# Supplementary material for: Visual pursuit behavior in mice maintains the pursued prey on the retinal region with least optic flow
Source: eLife journal article supplement (doi:10.7554/elife.70838), 2021-10-26
Supplement: fig6-data1 [file Arrows_LeftEye.xlsx]

## Sheet: Sheet1
X position	Y position	X offset	Y offset		Arrows scaled 0 to 1
0.0619673	0.0549538	0	0
0.0619673	0.145863	0	0
0.0619673	0.236772	0	0
0.0619673	0.327681	-0.030611	0.0115417
0.0619673	0.41859	-0.0336269	0.0136722
0.0619673	0.509499	-0.0362255	0.0145544
0.0619673	0.600408	-0.0382772	0.0144405
0.0619673	0.691317	-0.0399251	0.0137387
0.0619673	0.782227	0	0
0.0619673	0.873136	0	0
0.0619673	0.964045	0	0
0.152876	0.0549538	0	0
0.152876	0.145863	-0.0329363	0.00920047
0.152876	0.236772	-0.0359557	0.0128525
0.152876	0.327681	-0.0387699	0.0148228
0.152876	0.41859	-0.0413781	0.0152569
0.152876	0.509499	-0.0436911	0.0143664
0.152876	0.600408	-0.0454143	0.0124184
0.152876	0.691317	-0.0465744	0.00987926
0.152876	0.782227	-0.0471642	0.0071463
0.152876	0.873136	0	0
0.152876	0.964045	0	0
0.243786	0.0549538	0	0
0.243786	0.145863	-0.0388233	0.0154478
0.243786	0.236772	-0.0413688	0.0178215
0.243786	0.327681	-0.0437103	0.0182745
0.243786	0.41859	-0.0457393	0.0169275
0.243786	0.509499	-0.047585	0.0141722
0.243786	0.600408	-0.0488231	0.0102919
0.243786	0.691317	-0.0497043	0.00590625
0.243786	0.782227	-0.0500272	0.00141159
0.243786	0.873136	-0.0498561	-0.00250475
0.243786	0.964045	0	0
0.334695	0.0549538	-0.0396329	0.0185069
0.334695	0.145863	-0.0415622	0.0217539
0.334695	0.236772	-0.0433657	0.0228113
0.334695	0.327681	-0.0450361	0.0216874
0.334695	0.41859	-0.0465141	0.0186356
0.334695	0.509499	-0.047693	0.0139787
0.334695	0.600408	-0.0485375	0.00823036
0.334695	0.691317	-0.0489758	0.00198942
0.334695	0.782227	-0.0490749	-0.00420166
0.334695	0.873136	-0.048837	-0.00960986
0.334695	0.964045	-0.0482144	-0.0137286
0.425604	0.0549538	-0.0400237	0.0256885
0.425604	0.145863	-0.0409312	0.0278483
0.425604	0.236772	-0.0417972	0.0275531
0.425604	0.327681	-0.0426455	0.0249615
0.425604	0.41859	-0.043343	0.0202177
0.425604	0.509499	-0.0439208	0.0137967
0.425604	0.600408	-0.0441965	0.00625857
0.425604	0.691317	-0.0444608	-0.00169776
0.425604	0.782227	-0.0444897	-0.00948918
0.425604	0.873136	-0.044308	-0.0162914
0.425604	0.964045	-0.0439432	-0.0215138
0.516513	0.0549538	-0.0374428	0.0322792
0.516513	0.145863	-0.0372534	0.0334896
0.516513	0.236772	-0.0370765	0.0319977
0.516513	0.327681	-0.036891	0.0279487
0.516513	0.41859	-0.0367332	0.0216682
0.516513	0.509499	-0.0366128	0.0136304
0.516513	0.600408	-0.0365051	0.00449909
0.516513	0.691317	-0.0364695	-0.0050087
0.516513	0.782227	-0.0364791	-0.0142272
0.516513	0.873136	-0.0365621	-0.0222271
0.516513	0.964045	-0.036568	-0.0284417
0.607422	0.0549538	-0.0323885	0.0382512
0.607422	0.145863	-0.0308115	0.0384804
0.607422	0.236772	-0.0293818	0.0358913
0.607422	0.327681	-0.0281029	0.030557
0.607422	0.41859	-0.0269843	0.0228741
0.607422	0.509499	-0.0261773	0.01346
0.607422	0.600408	-0.0257292	0.00296736
0.607422	0.691317	-0.0255327	-0.00785664
0.607422	0.782227	-0.0256117	-0.0182494
0.607422	0.873136	-0.0260322	-0.0272455
0.607422	0.964045	-0.0267891	-0.0343612
0.698331	0.0549538	-0.0253886	0.0431378
0.698331	0.145863	-0.0223981	0.0425145
0.698331	0.236772	-0.0196893	0.0389972
0.698331	0.327681	-0.0172398	0.0326211
0.698331	0.41859	-0.0152442	0.0238569
0.698331	0.509499	-0.0138123	0.0133763
0.698331	0.600408	-0.0128917	0.00179302
0.698331	0.691317	-0.0126058	-0.0100234
0.698331	0.782227	-0.0129338	-0.0213123
0.698331	0.873136	-0.0138623	-0.0310758
0.698331	0.964045	0	0
0.78924	0.0549538	0	0
0.78924	0.145863	-0.0127931	0.0455477
0.78924	0.236772	-0.00873784	0.0412177
0.78924	0.327681	-0.00520965	0.0341029
0.78924	0.41859	-0.00235733	0.0245928
0.78924	0.509499	-0.00024294	0.0132993
0.78924	0.600408	0.000966712	0.000982936
0.78924	0.691317	0.001284	-0.0114658
0.78924	0.782227	0.000649085	-0.023338
0.78924	0.873136	-0.000844266	-0.0336086
0.78924	0.964045	0	0
0.880149	0.0549538	0	0
0.880149	0.145863	0	0
0.880149	0.236772	0.00240613	0.0425729
0.880149	0.327681	0.00699743	0.0349274
0.880149	0.41859	0.0106554	0.0249205
0.880149	0.509499	0.0133289	0.0132582
0.880149	0.600408	0.0147741	0.000573003
0.880149	0.691317	0.01504	-0.0121821
0.880149	0.782227	0.0140859	-0.0243089
0.880149	0.873136	0	0
0.880149	0.964045	0	0
0.971058	0.0549538	0	0
0.971058	0.145863	0	0
0.971058	0.236772	0	0
0.971058	0.327681	0	0
0.971058	0.41859	0.022707	0.0250449
0.971058	0.509499	0.0258321	0.013254
0.971058	0.600408	0.0275003	0.000567939
0.971058	0.691317	0	0
0.971058	0.782227	0	0
0.971058	0.873136	0	0
0.971058	0.964045	0	0
