# Supplementary material for: Visual pursuit behavior in mice maintains the pursued prey on the retinal region with least optic flow
Source: eLife journal article supplement (doi:10.7554/elife.70838), 2021-10-26
Supplement: fig6-data1 [file Arrows_RightEye.xlsx]

## Sheet: Sheet1
X position	Y position	X offset	Y offset		Arrows scaled 0 to 1
0.00621449	0.0105646	0	0
0.00621449	0.101474	0	0
0.00621449	0.192383	0	0
0.00621449	0.283292	0	0
0.00621449	0.374201	0	0
0.00621449	0.46511	-0.0221234	0.022821
0.00621449	0.556019	-0.0253206	0.0111014
0.00621449	0.646928	0	0
0.00621449	0.737837	0	0
0.00621449	0.828746	0	0
0.00621449	0.919656	0	0
0.0971236	0.0105646	0	0
0.0971236	0.101474	0	0
0.0971236	0.192383	0	0
0.0971236	0.283292	-0.00149454	0.0406577
0.0971236	0.374201	-0.00619708	0.032774
0.0971236	0.46511	-0.0100338	0.0227896
0.0971236	0.556019	-0.0128273	0.0111733
0.0971236	0.646928	-0.0144341	-0.00126404
0.0971236	0.737837	-0.0148499	-0.0137094
0.0971236	0.828746	0	0
0.0971236	0.919656	0	0
0.188033	0.0105646	0	0
0.188033	0.101474	0	0
0.188033	0.192383	0.0139307	0.0438696
0.188033	0.283292	0.00971176	0.0392651
0.188033	0.374201	0.00598039	0.0320916
0.188033	0.46511	0.00292599	0.0226028
0.188033	0.556019	0.000639074	0.0114918
0.188033	0.646928	-0.000759561	-0.000579417
0.188033	0.737837	-0.00123301	-0.0127006
0.188033	0.828746	-0.000761675	-0.024165
0.188033	0.919656	0	0
0.278942	0.0105646	0	0
0.278942	0.101474	0.0267614	0.0418603
0.278942	0.192383	0.0235707	0.0409813
0.278942	0.283292	0.0205595	0.0372511
0.278942	0.374201	0.0179258	0.0309092
0.278942	0.46511	0.0156793	0.0222809
0.278942	0.556019	0.0140062	0.0119702
0.278942	0.646928	0.0129183	0.000654709
0.278942	0.737837	0.0124621	-0.0108356
0.278942	0.828746	0.012639	-0.0217353
0.278942	0.919656	0.0134723	-0.0312772
0.369851	0.0105646	0	0
0.369851	0.101474	0.033663	0.0371523
0.369851	0.192383	0.0318263	0.0371887
0.369851	0.283292	0.0300996	0.0345294
0.369851	0.374201	0.0285599	0.029313
0.369851	0.46511	0.0272251	0.0218395
0.369851	0.556019	0.0261712	0.012639
0.369851	0.646928	0.0254781	0.00241466
0.369851	0.737837	0.0251437	-0.0081211
0.369851	0.828746	0.0251768	-0.0181965
0.369851	0.919656	0.025581	-0.0270979
0.46076	0.0105646	0.039023	0.0279563
0.46076	0.101474	0.0384355	0.0314992
0.46076	0.192383	0.0379023	0.0326431
0.46076	0.283292	0.0374286	0.0312377
0.46076	0.374201	0.0369643	0.0273659
0.46076	0.46511	0.0365412	0.0212993
0.46076	0.556019	0.0362247	0.0135058
0.46076	0.646928	0.0360301	0.00466049
0.46076	0.737837	0.0359337	-0.00465465
0.46076	0.828746	0.0358864	-0.0136462
0.46076	0.919656	0.0359744	-0.0215997
0.551669	0.0105646	0.0400255	0.0207942
0.551669	0.101474	0.0405352	0.0252334
0.551669	0.192383	0.04121	0.0275428
0.551669	0.283292	0.041829	0.0274736
0.551669	0.374201	0.0424986	0.0251465
0.551669	0.46511	0.0428755	0.0206172
0.551669	0.556019	0.043414	0.0145339
0.551669	0.646928	0.0437175	0.00723721
0.551669	0.737837	0.0438384	-0.00056422
0.551669	0.828746	0.0439278	-0.00822976
0.551669	0.919656	0.0438347	-0.0151022
0.642578	0.0105646	0	0
0.642578	0.101474	0.039779	0.0185705
0.642578	0.192383	0.0413996	0.0220991
0.642578	0.283292	0.0430331	0.0234615
0.642578	0.374201	0.0445581	0.0227191
0.642578	0.46511	0.0459115	0.0199988
0.642578	0.556019	0.0470481	0.0156453
0.642578	0.646928	0.0479488	0.0101216
0.642578	0.737837	0.0485011	0.00397242
0.642578	0.828746	0.0486978	-0.00219748
0.642578	0.919656	0.0487158	-0.00775967
0.733487	0.0105646	0	0
0.733487	0.101474	0.0358473	0.0118609
0.733487	0.192383	0.0382815	0.0165705
0.733487	0.283292	0.0406407	0.0193229
0.733487	0.374201	0.0429524	0.0202221
0.733487	0.46511	0.0450309	0.0192637
0.733487	0.556019	0.0468428	0.0167987
0.733487	0.646928	0.048318	0.0131271
0.733487	0.737837	0.0492874	0.00872654
0.733487	0.828746	0.049899	0.00414303
0.733487	0.919656	0.0500291	-5.18266e-05
0.824396	0.0105646	0	0
0.824396	0.101474	0	0
0.824396	0.192383	0.0319065	0.011109
0.824396	0.283292	0.034946	0.0152829
0.824396	0.374201	0.037853	0.0177602
0.824396	0.46511	0.0405358	0.0185905
0.824396	0.556019	0.0428834	0.0179212
0.824396	0.646928	0.0450428	0.0161712
0.824396	0.737837	0.0465285	0.0135477
0.824396	0.828746	0.0475269	0.0105832
0.824396	0.919656	0	0
0.915305	0.0105646	0	0
0.915305	0.101474	0	0
0.915305	0.192383	0	0
0.915305	0.283292	0.026206	0.0114534
0.915305	0.374201	0.0295022	0.0154105
0.915305	0.46511	0.0327337	0.0179213
0.915305	0.556019	0.0355989	0.0190312
0.915305	0.646928	0.0382402	0.019054
0.915305	0.737837	0.0402645	0.0181695
0.915305	0.828746	0	0
0.915305	0.919656	0	0
