# Supplementary material for: Visual pursuit behavior in mice maintains the pursued prey on the retinal region with least optic flow
Source: eLife journal article supplement (doi:10.7554/elife.70838), 2021-10-26
Supplement: fig6-data2 [file Arrows_LeftEye.xlsx]

## Sheet: Sheet1
X position	Yposition	Offset X	Offset Y		Arrows scaled 0 to 1
0	0	0	0
0	0.0909091	0	0
0	0.181818	0	0
0	0.272727	0	0
0	0.363636	0	0
0	0.454545	0	0
0	0.545455	0	0
0	0.636364	0	0
0	0.727273	0	0
0	0.818182	0	0
0	0.909091	0	0
0.0909091	0	0	0
0.0909091	0.0909091	0	0
0.0909091	0.181818	0	0
0.0909091	0.272727	-0.00288005	0.00313486
0.0909091	0.363636	-0.00446257	0.00386514
0.0909091	0.454545	-0.00658052	0.00475197
0.0909091	0.545455	-0.0110891	0.00695903
0.0909091	0.636364	-0.0216265	0.0115183
0.0909091	0.727273	-0.0377568	0.015684
0.0909091	0.818182	0	0
0.0909091	0.909091	0	0
0.181818	0	0	0
0.181818	0.0909091	0	0
0.181818	0.181818	-0.00155635	0.0018775
0.181818	0.272727	-0.00283132	0.00258012
0.181818	0.363636	-0.0045424	0.00332948
0.181818	0.454545	-0.00648662	0.00388139
0.181818	0.545455	-0.00901831	0.00431561
0.181818	0.636364	-0.0160169	0.00626558
0.181818	0.727273	-0.0316111	0.00909272
0.181818	0.818182	-0.0514222	0.00815548
0.181818	0.909091	0	0
0.272727	0	0	0
0.272727	0.0909091	-0.000357715	0.000755907
0.272727	0.181818	-0.000938344	0.000965263
0.272727	0.272727	-0.00229221	0.00182906
0.272727	0.363636	-0.00403724	0.00262313
0.272727	0.454545	-0.00593181	0.00313556
0.272727	0.545455	-0.00796741	0.00324656
0.272727	0.636364	-0.0116694	0.0033148
0.272727	0.727273	-0.0240498	0.00429267
0.272727	0.818182	-0.0438	0.00157567
0.272727	0.909091	-0.0636497	-0.0075141
0.363636	0	0	0
0.363636	0.0909091	-0.000144961	0.000268893
0.363636	0.181818	-0.00056155	0.000332415
0.363636	0.272727	-0.00142176	0.00079913
0.363636	0.363636	-0.00314311	0.00175713
0.363636	0.454545	-0.00487442	0.00231524
0.363636	0.545455	-0.00659263	0.00235723
0.363636	0.636364	-0.00905937	0.00198743
0.363636	0.727273	-0.0171749	0.00129216
0.363636	0.818182	-0.0346678	-0.00326675
0.363636	0.909091	-0.0535179	-0.0154068
0.454545	0	0	0
0.454545	0.0909091	-0.000211969	9.22e-06
0.454545	0.181818	-0.000615539	0.000112416
0.454545	0.272727	-0.00102809	0.000148359
0.454545	0.363636	-0.00203876	0.000670387
0.454545	0.454545	-0.00365187	0.0014911
0.454545	0.545455	-0.00510447	0.00165586
0.454545	0.636364	-0.0068398	0.0011525
0.454545	0.727273	-0.0117134	-0.00041037
0.454545	0.818182	-0.0255688	-0.00666262
0.454545	0.909091	-0.0414337	-0.0216873
0.545455	0	0	0
0.545455	0.0909091	-0.000360167	-0.000104497
0.545455	0.181818	-0.000672368	-6.89e-05
0.545455	0.272727	-0.00100751	-3.22e-05
0.545455	0.363636	-0.001347	-4.23e-05
0.545455	0.454545	-0.00245678	0.000607635
0.545455	0.545455	-0.00356458	0.00102345
0.545455	0.636364	-0.00468232	0.000562463
0.545455	0.727273	-0.00759239	-0.00132133
0.545455	0.818182	-0.0169891	-0.00912309
0.545455	0.909091	-0.0281723	-0.0266398
0.636364	0	0	0
0.636364	0.0909091	-0.000967701	0.00060462
0.636364	0.181818	-0.000828691	0.00013516
0.636364	0.272727	-0.000952211	-6.32e-05
0.636364	0.363636	-0.00120432	-8.5e-05
0.636364	0.454545	-0.00173685	0.000307176
0.636364	0.545455	-0.0023263	0.000696323
0.636364	0.636364	-0.00282914	0.000219542
0.636364	0.727273	-0.00423953	-0.0019076
0.636364	0.818182	-0.00864442	-0.0111735
0.636364	0.909091	-0.0140732	-0.0306237
0.727273	0	0	0
0.727273	0.0909091	-0.00151732	0.001793
0.727273	0.181818	-0.00126739	0.00148883
0.727273	0.272727	-0.00113111	0.00107898
0.727273	0.363636	-0.00112874	0.000788418
0.727273	0.454545	-0.00120741	0.00092196
0.727273	0.545455	-0.00123116	0.000956089
0.727273	0.636364	-0.00114702	0.000189753
0.727273	0.727273	-0.000556619	-0.00244553
0.727273	0.818182	0.000513519	-0.013258
0.727273	0.909091	0.000990544	-0.0339514
0.818182	0	0	0
0.818182	0.0909091	0	0
0.818182	0.181818	-0.00137179	0.00303997
0.818182	0.272727	-0.00101393	0.00279978
0.818182	0.363636	-0.000702744	0.00255169
0.818182	0.454545	-0.000303282	0.00228646
0.818182	0.545455	0.000190294	0.00168047
0.818182	0.636364	0.00127955	0.000633431
0.818182	0.727273	0.00551505	-0.00294675
0.818182	0.818182	0.0118976	-0.0152964
0.818182	0.909091	0	0
0.909091	0	0	0
0.909091	0.0909091	0	0
0.909091	0.181818	0	0
0.909091	0.272727	-0.000389471	0.0046293
0.909091	0.363636	0.000369534	0.00431719
0.909091	0.454545	0.00127573	0.00378179
0.909091	0.545455	0.00258211	0.00296999
0.909091	0.636364	0.00672862	0.00202475
0.909091	0.727273	0.0157241	-0.00314787
0.909091	0.818182	0	0
0.909091	0.909091	0	0
