# Supplementary material for: Visual pursuit behavior in mice maintains the pursued prey on the retinal region with least optic flow
Source: eLife journal article supplement (doi:10.7554/elife.70838), 2021-10-26
Supplement: fig6-data2 [file Arrows_RightEye.xlsx]

## Sheet: Sheet1
X position	Yposition	Offset X	Offset Y		Arrows scaled 0 to 1
0	0	0	0
0	0.0909091	0	0
0	0.181818	0	0
0	0.272727	0	0
0	0.363636	0	0
0	0.454545	0	0
0	0.545455	0	0
0	0.636364	0	0
0	0.727273	0	0
0	0.818182	0	0
0	0.909091	0	0
0.0909091	0	0	0
0.0909091	0.0909091	0	0
0.0909091	0.181818	0	0
0.0909091	0.272727	-0.00198534	0.00394591
0.0909091	0.363636	-0.00264361	0.00313767
0.0909091	0.454545	-0.00322543	0.0018744
0.0909091	0.545455	-0.00475292	5.94047e-05
0.0909091	0.636364	-0.00967914	-0.00650804
0.0909091	0.727273	-0.0144547	-0.0218669
0.0909091	0.818182	0	0
0.0909091	0.909091	0	0
0.181818	0	0	0
0.181818	0.0909091	0	0
0.181818	0.181818	-0.000465164	0.00305913
0.181818	0.272727	-0.000912643	0.00261443
0.181818	0.363636	-0.00122324	0.00230485
0.181818	0.454545	-0.00147905	0.00156463
0.181818	0.545455	-0.00174649	8.10747e-05
0.181818	0.636364	-0.00216711	-0.00562337
0.181818	0.727273	-0.00198469	-0.0209918
0.181818	0.818182	0.000204289	-0.0429967
0.181818	0.909091	0	0
0.272727	0	0	0
0.272727	0.0909091	0.000163854	0.00187703
0.272727	0.181818	-0.000322951	0.00144168
0.272727	0.272727	-0.000456076	0.00149456
0.272727	0.363636	-0.000338312	0.00166773
0.272727	0.454545	-1.39459e-05	0.0014104
0.272727	0.545455	0.000460004	0.000193712
0.272727	0.636364	0.0044144	-0.00479604
0.272727	0.727273	0.0108842	-0.0195677
0.272727	0.818182	0.0181416	-0.0413211
0.272727	0.909091	0.0259003	-0.0639138
0.363636	0	0	0
0.363636	0.0909091	0.000167568	0.00110787
0.363636	0.181818	-0.000190785	0.000985353
0.363636	0.272727	-0.000251126	0.00102081
0.363636	0.363636	0.000670028	0.00164899
0.363636	0.454545	0.00164634	0.00155164
0.363636	0.545455	0.0028763	0.000457391
0.363636	0.636364	0.0107582	-0.00390832
0.363636	0.727273	0.0236009	-0.0173593
0.363636	0.818182	0.0360879	-0.0375801
0.363636	0.909091	0.0470872	-0.0587915
0.454545	0	0	0
0.454545	0.0909091	0.000369896	0.00084042
0.454545	0.181818	-1.3725e-05	0.0007271
0.454545	0.272727	0.000656976	0.00126303
0.454545	0.363636	0.00200097	0.00183412
0.454545	0.454545	0.00344609	0.00175032
0.454545	0.545455	0.00555545	0.000809813
0.454545	0.636364	0.0170018	-0.00281225
0.454545	0.727273	0.0352107	-0.0142847
0.454545	0.818182	0.0521374	-0.0317784
0.454545	0.909091	0.0657983	-0.0501672
0.545455	0	0	0
0.545455	0.0909091	0.000464278	0.000501736
0.545455	0.181818	0.000301364	0.00058892
0.545455	0.272727	0.00184907	0.00143936
0.545455	0.363636	0.00325795	0.0018587
0.545455	0.454545	0.00508692	0.00185281
0.545455	0.545455	0.00807179	0.00119275
0.545455	0.636364	0.0225205	-0.00141908
0.545455	0.727273	0.0444595	-0.0103177
0.545455	0.818182	0.0642687	-0.024118
0.545455	0.909091	0.0793764	-0.0385307
0.636364	0	0	0
0.636364	0.0909091	0.000450859	0.000125497
0.636364	0.181818	0.000723734	0.000454756
0.636364	0.272727	0.00251568	0.00124491
0.636364	0.363636	0.00409728	0.001701
0.636364	0.454545	0.00620898	0.00184902
0.636364	0.545455	0.00989221	0.00159995
0.636364	0.636364	0.0266027	0.0002687
0.636364	0.727273	0.0500799	-0.00561791
0.636364	0.818182	0.0707574	-0.0151105
0.636364	0.909091	0.0859448	-0.0249003
0.727273	0	0	0
0.727273	0.0909091	0.000397928	-0.000203805
0.727273	0.181818	0.000959608	0.00019288
0.727273	0.272727	0.00257309	0.000838282
0.727273	0.363636	0.00423584	0.00138353
0.727273	0.454545	0.00651735	0.00175721
0.727273	0.545455	0.0108173	0.00203127
0.727273	0.636364	0.0286572	0.00220026
0.727273	0.727273	0.0512408	-0.000507315
0.727273	0.818182	0.0707768	-0.00551123
0.727273	0.909091	0.0846903	-0.0105498
0.818182	0	0	0
0.818182	0.0909091	0	0
0.818182	0.181818	0.000915656	-0.000148982
0.818182	0.272727	0.00223622	0.000396103
0.818182	0.363636	0.00378096	0.000996605
0.818182	0.454545	0.00593865	0.00159302
0.818182	0.545455	0.0108793	0.00251142
0.818182	0.636364	0.0279541	0.00425455
0.818182	0.727273	0.0475819	0.00461779
0.818182	0.818182	0.0643826	0.00384963
0.818182	0.909091	0	0
0.909091	0	0	0
0.909091	0.0909091	0	0
0.909091	0.181818	0	0
0.909091	0.272727	0.00171186	-2.54645e-05
0.909091	0.363636	0.00293164	0.000591305
0.909091	0.454545	0.00462003	0.00140057
0.909091	0.545455	0.0100952	0.00309147
0.909091	0.636364	0.0243716	0.00627163
0.909091	0.727273	0.0397464	0.00932546
0.909091	0.818182	0	0
0.909091	0.909091	0	0
