# Supplementary material for: Visual pursuit behavior in mice maintains the pursued prey on the retinal region with least optic flow
Source: eLife. 2021 Oct 26;10:e70838. doi: 10.7554/eLife.70838 (PMC8547958; doi:10.7554/eLife.70838)
Supplement: Figure 2—source data 1. [file elife-70838-fig2-data1.xlsx]

## Sheet: 2A
Left panel									Right panel
Mouse		Cricket		Nframes(mice)		Nframes(cricket)		Nmice	Mouse		Cricket		Nframes(mice)		Nframes(cricket)		Nmice
X(cm)	Y(cm)	X(cm)	Y(cm)	4011	4011	4011	4011	1	X(cm)	Y(cm)	X(cm)	Y(cm)	547118	547118	547118	547118	1
-77.6356	-21.9527	-65.5454	2.8574	2732	2732	3791	3791		NaN	NaN	NaN	NaN	67027	67027	50743	50743
-77.6219	-21.9848	-65.5454	2.84643						NaN	NaN	NaN	NaN
-77.5941	-21.8503	-65.6649	2.71621						NaN	NaN	NaN	NaN
-77.5733	-21.7829	-65.6442	2.66978						NaN	NaN	NaN	NaN
-77.4755	-21.6684	-65.6857	2.62094						NaN	NaN	NaN	NaN
-77.5258	-21.8416	-65.7402	2.49492						NaN	NaN	NaN	NaN
-77.4728	-21.6518	-65.712	2.50994						NaN	NaN	NaN	NaN
-77.5311	-21.7229	-65.7679	2.46592						NaN	NaN	NaN	NaN
-77.4399	-21.7984	-65.8664	2.42705						NaN	NaN	NaN	NaN
-77.1956	-21.8886	-65.856	2.31267						NaN	NaN	NaN	NaN
-77.3101	-21.7942	-65.8482	2.27928						NaN	NaN	NaN	NaN
-77.1456	-21.8179	-65.8541	2.21847						NaN	NaN	NaN	NaN
-77.1612	-21.7198	-65.8965	2.14313						NaN	NaN	NaN	NaN
-76.9882	-21.8756	-65.9547	2.07257						NaN	NaN	NaN	NaN
-76.9759	-21.888	-65.9547	2.07257						NaN	NaN	NaN	NaN
-76.891	-21.6264	-65.9889	1.92882						NaN	NaN	NaN	NaN
-76.64	-21.738	-66.0328	1.78097						NaN	NaN	NaN	NaN
-76.7007	-21.8924	-66.0496	1.76617						NaN	NaN	NaN	NaN
-76.4686	-21.7764	-66.0585	1.79031						NaN	NaN	NaN	NaN
-76.4332	-21.8564	-66.0605	1.84832						NaN	NaN	NaN	NaN
-76.343	-22.0884	-66.0748	1.82233						NaN	NaN	NaN	NaN
-76.0895	-21.9903	-66.0819	1.80933						NaN	NaN	NaN	NaN
-76.2743	-21.9641	-66.0972	1.73089						NaN	NaN	NaN	NaN
-76.0994	-22.1409	-66.0996	1.71079						NaN	NaN	NaN	NaN
-76.1614	-22.3291	-66.1332	1.659						NaN	NaN	NaN	NaN
-75.8313	-22.213	-66.1261	1.5907						NaN	NaN	NaN	NaN
-75.915	-22.1965	-66.1296	1.54495						NaN	NaN	NaN	NaN
-75.7168	-22.3861	-66.1981	1.49825						NaN	NaN	NaN	NaN
-75.5691	-22.4465	-66.2192	1.44226						NaN	NaN	NaN	NaN
-75.7372	-22.4987	-66.239	1.41428						NaN	NaN	NaN	NaN
-75.5141	-22.6328	-66.2269	1.39393						NaN	NaN	NaN	NaN
-75.355	-22.5714	-66.3019	1.32514						NaN	NaN	NaN	NaN
-75.2773	-22.6634	-66.3019	1.32514						NaN	NaN	NaN	NaN
-75.2997	-22.8203	-66.3019	1.32514						NaN	NaN	NaN	NaN
-74.8769	-22.8266	-66.415	1.30762						NaN	NaN	NaN	NaN
-74.9636	-22.8873	-66.415	1.30762						NaN	NaN	NaN	NaN
-74.8971	-22.9559	-66.4614	1.16859						NaN	NaN	NaN	NaN
-74.7361	-22.9918	-66.4817	1.01522						NaN	NaN	NaN	NaN
-74.8177	-22.8452	-66.5428	0.891361						NaN	NaN	NaN	NaN
-74.487	-22.9852	-66.5152	0.881943						NaN	NaN	NaN	NaN
-74.4725	-23.1181	-66.5303	0.84159						NaN	NaN	NaN	NaN
-74.3196	-23.1257	-66.5654	0.694496						NaN	NaN	NaN	NaN
-74.2754	-22.985	-66.5654	0.694496						NaN	NaN	NaN	NaN
-73.9554	-23.1521	-66.5654	0.694496						NaN	NaN	NaN	NaN
-74.1927	-23.201	-66.5654	0.694496						NaN	NaN	NaN	NaN
-73.7897	-23.2492	-66.5854	0.558906						NaN	NaN	NaN	NaN
-74.0358	-23.0578	-66.6312	0.428266						NaN	NaN	NaN	NaN
-73.5682	-23.128	-66.6417	0.342231						NaN	NaN	NaN	NaN
-73.6679	-23.1169	-66.6566	0.254812						NaN	NaN	NaN	NaN
-73.3719	-23.293	-66.6655	0.203458						NaN	NaN	NaN	NaN
-73.316	-23.2543	-66.6834	0.124308						NaN	NaN	NaN	NaN
-73.1678	-23.2221	-66.7018	0.0702728						NaN	NaN	NaN	NaN
-73.248	-23.2566	-66.7812	-0.0229854						NaN	NaN	NaN	NaN
-73.226	-23.1693	-66.7502	-0.0437473						NaN	NaN	NaN	NaN
-73.2148	-23.0319	-66.7655	-0.0413878						NaN	NaN	NaN	NaN
-72.9903	-23.1065	-66.7821	-0.0662086						NaN	NaN	NaN	NaN
-72.8754	-23.2759	-66.8288	-0.144466						NaN	NaN	NaN	NaN
-72.6756	-23.3462	-66.8319	-0.212308						NaN	NaN	NaN	NaN
-72.5044	-23.1827	-66.8626	-0.207559						NaN	NaN	NaN	NaN
-72.7754	-22.8525	-66.8714	-0.230889						NaN	NaN	NaN	NaN
-72.6068	-22.8578	-66.9227	-0.279131						NaN	NaN	NaN	NaN
-72.4533	-22.847	-66.9373	-0.368505						NaN	NaN	NaN	NaN
-72.1969	-22.8313	-66.9583	-0.40931						NaN	NaN	NaN	NaN
-72.0806	-23.2099	-66.9713	-0.450683						NaN	NaN	NaN	NaN
-71.635	-23.1694	-66.9713	-0.450683						NaN	NaN	NaN	NaN
-71.753	-23.2227	-67.0432	-0.572776						NaN	NaN	NaN	NaN
-71.5595	-22.7923	-67.0519	-0.617569						NaN	NaN	NaN	NaN
-71.3544	-23.1719	-67.0671	-0.659507						NaN	NaN	NaN	NaN
-71.2293	-22.8893	-67.0619	-0.733422						NaN	NaN	NaN	NaN
-70.9179	-23.2902	-67.0582	-0.773785						NaN	NaN	NaN	NaN
-70.7324	-23.2137	-67.0845	-0.801237						NaN	NaN	NaN	NaN
-70.5728	-23.0033	-67.0935	-0.833274						NaN	NaN	NaN	NaN
-70.4052	-23.1107	-67.1047	-0.886399						NaN	NaN	NaN	NaN
-70.2972	-23.1254	-67.1434	-1.02404						NaN	NaN	NaN	NaN
-70.1055	-23.2241	-67.1326	-1.05126						NaN	NaN	NaN	NaN
-70.1373	-23.3769	-67.1803	-1.05625						NaN	NaN	NaN	NaN
-69.7528	-22.9768	-67.1979	-1.10349						NaN	NaN	NaN	NaN
-70.0013	-22.7669	-67.3003	-1.22075						NaN	NaN	NaN	NaN
-69.9414	-22.6312	-67.2973	-1.2627						NaN	NaN	NaN	NaN
-69.7683	-22.9432	-67.3689	-1.32983						NaN	NaN	NaN	NaN
-69.6961	-22.6246	-67.3911	-1.33263						NaN	NaN	NaN	NaN
-69.566	-22.5563	-67.3995	-1.34934						NaN	NaN	NaN	NaN
-69.3086	-22.6571	-67.4562	-1.42021						NaN	NaN	NaN	NaN
-69.0419	-22.7669	-67.507	-1.47305						NaN	NaN	NaN	NaN
-69.0729	-22.7548	-67.4967	-1.5217						NaN	NaN	NaN	NaN
-68.8603	-22.6534	-67.519	-1.56589						NaN	NaN	NaN	NaN
-68.7601	-22.7242	-67.6138	-1.59571						NaN	NaN	NaN	NaN
-68.512	-22.5801	-67.6105	-1.67866						NaN	NaN	NaN	NaN
-68.2875	-22.7181	-67.6432	-1.74729						NaN	NaN	NaN	NaN
-68.2658	-22.6185	-67.7679	-1.84569						NaN	NaN	NaN	NaN
-68.1452	-22.5966	-67.7817	-1.91682						NaN	NaN	NaN	NaN
-68.0012	-22.6413	-67.9173	-2.03171						NaN	NaN	NaN	NaN
-67.8597	-22.6216	-67.8533	-2.05897						NaN	NaN	NaN	NaN
-67.6924	-22.4595	-67.9113	-2.13325						NaN	NaN	NaN	NaN
-67.6027	-22.488	-67.9546	-2.21036						NaN	NaN	NaN	NaN
-67.6267	-22.4558	-67.96	-2.22503						NaN	NaN	NaN	NaN
-67.3902	-22.5005	-68.0349	-2.30585						NaN	NaN	NaN	NaN
-67.2025	-22.3985	-68.112	-2.39669						NaN	NaN	NaN	NaN
-67.3155	-22.3748	-68.0514	-2.4177						NaN	NaN	NaN	NaN
-67.2361	-22.2511	-68.0764	-2.46981						NaN	NaN	NaN	NaN
-67.2017	-22.189	-68.16	-2.50876						NaN	NaN	NaN	NaN
-67.1071	-22.1592	-68.1902	-2.626						NaN	NaN	NaN	NaN
-67.0411	-22.0175	-68.2466	-2.70966						NaN	NaN	NaN	NaN
-67.0651	-22.0799	-68.2778	-2.8083						NaN	NaN	NaN	NaN
-66.998	-22.02	-68.3137	-2.85898						NaN	NaN	NaN	NaN
-66.9643	-21.9553	-68.3361	-2.90348						NaN	NaN	NaN	NaN
-66.9287	-21.8067	-68.3361	-2.90348						NaN	NaN	NaN	NaN
-66.8459	-21.7283	-68.4001	-2.9064						NaN	NaN	NaN	NaN
-66.7788	-21.6653	-68.4792	-3.01708						NaN	NaN	NaN	NaN
-66.5854	-21.6521	-68.5237	-3.09528						NaN	NaN	NaN	NaN
-66.7208	-21.5879	-68.5831	-3.22274						NaN	NaN	NaN	NaN
-66.7069	-21.3792	-68.6008	-3.27566						NaN	NaN	NaN	NaN
-66.5164	-21.289	-68.6487	-3.31951						NaN	NaN	NaN	NaN
-66.4627	-21.1486	-68.6493	-3.32842						NaN	NaN	NaN	NaN
-66.5765	-21.1595	-68.6992	-3.45443						NaN	NaN	NaN	NaN
-66.4569	-20.9746	-68.7087	-3.4664						NaN	NaN	NaN	NaN
-66.3271	-20.7305	-68.7771	-3.47563						NaN	NaN	NaN	NaN
-66.4618	-20.6794	-68.749	-3.49551						NaN	NaN	NaN	NaN
-66.4794	-20.5825	-68.749	-3.49551						NaN	NaN	NaN	NaN
-66.5609	-20.3412	-68.749	-3.49551						NaN	NaN	NaN	NaN
-66.5654	-20.187	-68.7964	-3.51483						NaN	NaN	NaN	NaN
-66.4282	-20.1674	-68.8488	-3.61146						NaN	NaN	NaN	NaN
-66.5749	-19.9014	-68.8556	-3.7303						NaN	NaN	NaN	NaN
-66.5652	-19.9625	-68.9773	-3.83839						NaN	NaN	NaN	NaN
-66.5492	-19.6714	-68.9285	-3.77893						NaN	NaN	NaN	NaN
-66.4859	-19.7414	-68.9796	-3.88782						NaN	NaN	NaN	NaN
-66.5199	-19.5978	-68.9807	-3.95184						NaN	NaN	NaN	NaN
-66.5729	-19.6295	-69.0375	-3.98854						NaN	NaN	NaN	NaN
-66.5593	-19.433	-69.0935	-4.01507						NaN	NaN	NaN	NaN
-66.6179	-19.4779	-69.1116	-4.04203						NaN	NaN	NaN	NaN
-66.5299	-19.2221	-69.2196	-4.14058						NaN	NaN	NaN	NaN
-66.5235	-19.1658	-69.2667	-4.17551						NaN	NaN	NaN	NaN
-66.4377	-19.028	-69.2749	-4.18352						NaN	NaN	NaN	NaN
-66.383	-19.0049	-69.3288	-4.29133						NaN	NaN	NaN	NaN
-66.3424	-18.8499	-69.3968	-4.3786						NaN	NaN	NaN	NaN
-66.3335	-18.665	-69.4231	-4.46033						NaN	NaN	NaN	NaN
-66.5378	-18.6437	-69.4235	-4.46898						NaN	NaN	NaN	NaN
-66.2797	-18.3507	-69.4558	-4.49952						NaN	NaN	NaN	NaN
-66.5046	-18.3446	-69.4682	-4.54233						NaN	NaN	NaN	NaN
-66.3854	-18.497	-69.467	-4.64857						NaN	NaN	NaN	NaN
-66.3799	-18.1588	-69.4526	-4.70784						NaN	NaN	NaN	NaN
-66.2096	-18.194	-69.5246	-4.89398						NaN	NaN	NaN	NaN
-66.4542	-18.0794	-69.5486	-4.97255						NaN	NaN	NaN	NaN
-66.4446	-17.9386	-69.5393	-5.07871						NaN	NaN	NaN	NaN
-66.3039	-17.9391	-69.6327	-5.1891						NaN	NaN	NaN	NaN
-66.2594	-17.8462	-69.6082	-5.13912						NaN	NaN	NaN	NaN
-66.2419	-17.6337	-69.6025	-5.21009						NaN	NaN	NaN	NaN
-66.0255	-17.6817	-69.749	-5.31885						NaN	NaN	NaN	NaN
-65.9948	-17.5203	-69.7041	-5.37709						NaN	NaN	NaN	NaN
-66.0181	-17.2953	-69.7585	-5.49191						NaN	NaN	NaN	NaN
-66.2588	-17.0984	-69.7136	-5.49969						NaN	NaN	NaN	NaN
-66.1925	-16.9502	-69.7393	-5.58099						NaN	NaN	NaN	NaN
-66.1192	-16.8948	-69.8178	-5.68558						NaN	NaN	NaN	NaN
-66.2694	-16.7385	-69.8301	-5.74283						NaN	NaN	NaN	NaN
-66.2981	-16.618	-69.8785	-5.76029						NaN	NaN	NaN	NaN
-66.3733	-16.4622	-69.9436	-5.79702						NaN	NaN	NaN	NaN
-66.5062	-16.3948	-69.9908	-5.81335						NaN	NaN	NaN	NaN
-66.6235	-16.0896	-69.9305	-5.92645						NaN	NaN	NaN	NaN
-66.6271	-15.894	-69.9527	-5.92966						NaN	NaN	NaN	NaN
-66.6815	-15.7888	-70.0005	-5.96253						NaN	NaN	NaN	NaN
-66.7841	-15.7161	-70.0172	-6.00344						NaN	NaN	NaN	NaN
-66.8214	-15.6142	-70.0538	-6.10184						NaN	NaN	NaN	NaN
-66.6618	-15.3846	-70.1081	-6.08221						NaN	NaN	NaN	NaN
-66.8299	-15.2153	-70.1174	-6.10158						NaN	NaN	NaN	NaN
-67.0794	-15.0566	-70.1529	-6.17307						NaN	NaN	NaN	NaN
-67.1792	-14.672	-70.2013	-6.18175						NaN	NaN	NaN	NaN
-67.1845	-14.6031	-70.2887	-6.24252						NaN	NaN	NaN	NaN
-67.2956	-14.4244	-70.3117	-6.2549						NaN	NaN	NaN	NaN
-67.3891	-14.3654	-70.3192	-6.27843						NaN	NaN	NaN	NaN
-67.5763	-14.1147	-70.3277	-6.34981						NaN	NaN	NaN	NaN
-67.7315	-14.2068	-70.333	-6.3766						NaN	NaN	NaN	NaN
-67.5909	-13.8378	-70.3515	-6.40845						NaN	NaN	NaN	NaN
-67.829	-13.573	-70.3986	-6.45289						NaN	NaN	NaN	NaN
-67.9027	-13.4923	-70.4238	-6.55663						NaN	NaN	NaN	NaN
-67.9705	-13.3886	-70.4697	-6.59771						NaN	NaN	NaN	NaN
-68.0409	-13.2236	-70.5427	-6.73528						NaN	NaN	NaN	NaN
-68.1359	-13.0954	-70.6065	-6.87355						NaN	NaN	NaN	NaN
-68.1056	-12.8502	-70.6073	-6.90526						NaN	NaN	NaN	NaN
-68.3932	-12.6258	-70.6497	-7.06768						NaN	NaN	NaN	NaN
-68.4105	-12.6873	-70.6712	-7.09556						NaN	NaN	NaN	NaN
-68.4562	-12.3327	-70.6912	-7.1809						NaN	NaN	NaN	NaN
-68.5868	-12.4694	-70.6323	-7.11147						NaN	NaN	NaN	NaN
-68.8705	-12.1765	-70.669	-7.12232						NaN	NaN	NaN	NaN
-68.8777	-11.9598	-70.7137	-7.09226						NaN	NaN	NaN	NaN
-68.7555	-11.8555	-70.7187	-7.17823						NaN	NaN	NaN	NaN
-69.0028	-11.6936	-70.7406	-7.25837						NaN	NaN	NaN	NaN
-69.0764	-11.3978	-70.7418	-7.36543						NaN	NaN	NaN	NaN
-69.213	-11.339	-70.7608	-7.40179						NaN	NaN	NaN	NaN
-68.8513	-10.8885	-70.7626	-7.49884						NaN	NaN	NaN	NaN
-69.2365	-11.0199	-70.811	-7.59216						NaN	NaN	NaN	NaN
-69.0369	-10.6447	-70.9041	-7.66878						NaN	NaN	NaN	NaN
-69.2731	-10.4348	-70.935	-7.7287						NaN	NaN	NaN	NaN
-69.3717	-10.3717	-70.9316	-7.76665						NaN	NaN	NaN	NaN
-69.3459	-10.0695	-70.9211	-7.73515						NaN	NaN	NaN	NaN
-69.3582	-9.87429	-70.972	-7.87726						NaN	NaN	NaN	NaN
-69.5264	-9.88359	-71.0187	-7.86813						NaN	NaN	NaN	NaN
-69.6277	-9.70534	-71.0421	-7.88159						NaN	NaN	NaN	NaN
-69.4824	-9.48726	-71.0481	-7.93414						NaN	NaN	NaN	NaN
-69.7216	-9.37297	-71.0791	-7.94367						NaN	NaN	NaN	NaN
-69.7811	-9.30207	-71.3555	-8.26422						NaN	NaN	NaN	NaN
-69.8823	-9.22996	-71.3555	-8.26422						NaN	NaN	NaN	NaN
-69.8303	-9.0081	-71.365	-8.25582						NaN	NaN	NaN	NaN
-70.2338	-8.81358	-71.4369	-8.22896						NaN	NaN	NaN	NaN
-70.3502	-8.703	-71.4544	-8.28427						NaN	NaN	NaN	NaN
-70.2242	-8.40388	-71.4925	-8.33749						NaN	NaN	NaN	NaN
-70.5339	-8.43996	-71.5262	-8.43404						NaN	NaN	NaN	NaN
-70.6503	-8.41491	NaN	NaN						NaN	NaN	NaN	NaN
-70.7257	-8.27529	NaN	NaN						NaN	NaN	NaN	NaN
-71.0028	-8.25353	NaN	NaN						NaN	NaN	NaN	NaN
-71.2095	-7.96922	NaN	NaN						NaN	NaN	NaN	NaN
-71.3666	-7.9233	NaN	NaN						NaN	NaN	NaN	NaN
-71.6494	-7.79229	NaN	NaN						NaN	NaN	NaN	NaN
-71.6657	-7.8189	NaN	NaN						NaN	NaN	NaN	NaN
-72.0017	-7.65133	NaN	NaN						NaN	NaN	NaN	NaN
-72.2068	-7.74719	NaN	NaN						NaN	NaN	NaN	NaN
-72.2505	-7.67809	NaN	NaN						NaN	NaN	NaN	NaN
-72.2955	-7.50813	NaN	NaN						NaN	NaN	NaN	NaN
-72.4729	-7.45136	NaN	NaN						NaN	NaN	NaN	NaN
-72.7557	-7.4245	NaN	NaN						NaN	NaN	NaN	NaN
-72.874	-7.82669	NaN	NaN						NaN	NaN	NaN	NaN
-72.9951	-7.56325	NaN	NaN						NaN	NaN	NaN	NaN
-73.2017	-7.71224	-75.2673	-8.9333						NaN	NaN	NaN	NaN
-73.5118	-7.80477	-75.4228	-9.26636						NaN	NaN	NaN	NaN
-73.7412	-7.85701	-75.6936	-9.25842						NaN	NaN	NaN	NaN
-73.9232	-7.98832	-75.9848	-9.24437						NaN	NaN	NaN	NaN
-74.1292	-8.14021	-76.2315	-9.2186						NaN	NaN	NaN	NaN
-74.2727	-8.14995	-76.3435	-9.34632						NaN	NaN	NaN	NaN
-74.302	-8.19004	-76.6599	-9.46272						NaN	NaN	NaN	NaN
-74.541	-8.34547	-76.4451	-9.02378						NaN	NaN	NaN	NaN
-74.7156	-8.3561	-76.6991	-9.1226						NaN	NaN	NaN	NaN
-74.8568	-8.57643	-76.6301	-9.16637						NaN	NaN	NaN	NaN
-74.9557	-9.03464	-76.9035	-9.31661						NaN	NaN	NaN	NaN
-75.0262	-9.21865	-76.9323	-9.43843						NaN	NaN	NaN	NaN
-75.5958	-9.13641	-77.1449	-9.40196						NaN	NaN	NaN	NaN
-75.5177	-9.56338	-77.2775	-9.19896						NaN	NaN	NaN	NaN
-75.7976	-9.77228	-77.4473	-9.18412						NaN	NaN	NaN	NaN
-75.8883	-9.93859	-78.0002	-9.06718						NaN	NaN	NaN	NaN
-76.0094	-10.1903	-78.4871	-8.93357						NaN	NaN	NaN	NaN
-76.3634	-10.2233	-79.1307	-8.72872						NaN	NaN	NaN	NaN
-76.5339	-10.6566	-79.455	-8.55965						NaN	NaN	NaN	NaN
-76.8839	-10.7582	-79.9809	-8.40358						NaN	NaN	NaN	NaN
-76.7453	-10.9544	-80.4783	-8.26072						NaN	NaN	NaN	NaN
-77.3458	-11.083	-80.8912	-7.98946						NaN	NaN	NaN	NaN
-77.3725	-11.2401	-81.3004	-7.80499						NaN	NaN	NaN	NaN
-77.5797	-11.2831	-81.7664	-7.56966						NaN	NaN	NaN	NaN
-77.6978	-11.3902	-82.2315	-7.29908						NaN	NaN	NaN	NaN
-77.943	-11.603	-82.7262	-6.97457						NaN	NaN	NaN	NaN
-78.0746	-11.606	-83.1415	-6.77841						NaN	NaN	NaN	NaN
-78.1184	-11.8312	-83.6428	-6.51979						NaN	NaN	NaN	NaN
-77.8719	-11.6351	-83.9707	-6.34987						NaN	NaN	NaN	NaN
-77.9128	-11.7952	-84.4663	-6.1362						NaN	NaN	NaN	NaN
-78.1707	-11.8451	-84.9554	-5.93117						NaN	NaN	NaN	NaN
-78.2782	-11.8885	-85.4951	-5.66607						NaN	NaN	NaN	NaN
-78.3541	-11.8	-85.9184	-5.46902						NaN	NaN	NaN	NaN
-78.3374	-12.0289	-86.3274	-5.25483						NaN	NaN	NaN	NaN
-78.3631	-12.1152	-86.7596	-5.04826						NaN	NaN	NaN	NaN
-78.4519	-12.1419	-87.1909	-4.78655						NaN	NaN	NaN	NaN
-78.6078	-12.2255	-87.5569	-4.65955						NaN	NaN	NaN	NaN
-78.7351	-12.1978	-88.0061	-4.37895						NaN	NaN	NaN	NaN
-78.6415	-12.1261	-88.5993	-4.17279						NaN	NaN	NaN	NaN
-78.5471	-12.0435	-89.0413	-3.97159						NaN	NaN	NaN	NaN
-78.6133	-12.0043	-89.4428	-3.69988						NaN	NaN	NaN	NaN
-78.7524	-12.0983	-89.9075	-3.49521						NaN	NaN	NaN	NaN
-78.8279	-11.9123	-90.4736	-3.28914						NaN	NaN	NaN	NaN
-78.6743	-12.0876	-90.8356	-3.0535						NaN	NaN	NaN	NaN
-78.8259	-12.2054	-91.2169	-2.89185						NaN	NaN	NaN	NaN
-78.7794	-12.377	-91.7658	-2.77878						NaN	NaN	NaN	NaN
-78.8884	-12.3476	-92.2733	-2.50494						NaN	NaN	NaN	NaN
-78.6322	-12.2344	-92.6305	-2.30663						NaN	NaN	NaN	NaN
-78.8375	-12.3966	-93.0673	-2.1154						NaN	NaN	NaN	NaN
-78.8338	-12.5301	-93.5997	-1.90839						NaN	NaN	NaN	NaN
-78.7872	-12.6347	-94.0957	-1.77753						NaN	NaN	NaN	NaN
-78.5822	-12.6088	-94.487	-1.47064						NaN	NaN	NaN	NaN
-78.3175	-12.7809	-94.7113	-1.42409						NaN	NaN	NaN	NaN
-78.5157	-12.7249	-95.161	-1.11625						NaN	NaN	NaN	NaN
-78.5088	-12.9028	-95.4818	-1.01029						NaN	NaN	NaN	NaN
-78.5372	-12.7918	-95.5916	-0.981764						NaN	NaN	NaN	NaN
-78.4579	-12.9903	-95.5176	-1.01308						NaN	NaN	NaN	NaN
-78.1897	-13.1113	-95.5124	-1.03951						NaN	NaN	NaN	NaN
-77.9936	-13.1552	-95.5063	-1.07037						NaN	NaN	NaN	NaN
-78.0447	-13.2905	-95.5066	-1.11135						NaN	NaN	NaN	NaN
-77.9072	-13.4836	-95.5198	-1.04664						NaN	NaN	NaN	NaN
-77.9263	-13.5078	-95.5021	-1.13294						NaN	NaN	NaN	NaN
-77.6781	-13.4911	-95.4525	-1.15152						NaN	NaN	NaN	NaN
-77.5982	-13.5842	-95.4308	-1.11464						NaN	NaN	NaN	NaN
-77.5492	-13.7643	-95.4192	-1.14501						NaN	NaN	NaN	NaN
-77.4944	-13.9913	-95.3767	-1.19						NaN	NaN	NaN	NaN
-77.3339	-13.7692	-95.3968	-1.15049						NaN	NaN	NaN	NaN
-77.3883	-14.2653	-95.4518	-1.15696						NaN	NaN	NaN	NaN
-77.2707	-14.3248	-95.3827	-1.19724						NaN	NaN	NaN	NaN
-77.2549	-14.5179	-95.3835	-1.16791						NaN	NaN	NaN	NaN
-77.1127	-14.6623	-95.3835	-1.16791						NaN	NaN	NaN	NaN
-76.996	-14.6735	-95.3394	-1.16181						NaN	NaN	NaN	NaN
-76.9089	-14.8463	-95.3119	-1.16804						NaN	NaN	NaN	NaN
-76.8827	-14.946	-95.2981	-1.16914						NaN	NaN	NaN	NaN
-76.8672	-15.1046	-95.2715	-1.23299						NaN	NaN	NaN	NaN
-76.7028	-15.0649	-95.2969	-1.26024						NaN	NaN	NaN	NaN
-76.7532	-15.2216	-95.2666	-1.25574						NaN	NaN	NaN	NaN
-76.5835	-15.2356	-95.2871	-1.23926						NaN	NaN	NaN	NaN
-76.565	-15.5565	-95.3212	-1.2224						NaN	NaN	NaN	NaN
-76.336	-15.788	-95.3124	-1.21692						NaN	NaN	NaN	NaN
-76.34	-15.6585	-95.2619	-1.17705						NaN	NaN	NaN	NaN
-76.3303	-15.8097	-95.2716	-1.19172						NaN	NaN	NaN	NaN
-76.1132	-15.9647	-95.3053	-1.21726						NaN	NaN	NaN	NaN
-76.2939	-16.0091	-95.2962	-1.26051						NaN	NaN	NaN	NaN
-76.2163	-16.2499	-95.3201	-1.26822						NaN	NaN	NaN	NaN
-75.9891	-16.3417	-95.3308	-1.23707						NaN	NaN	NaN	NaN
-76.3848	-16.5122	-95.2929	-1.17818						NaN	NaN	NaN	NaN
-76.3382	-16.5567	-95.2929	-1.17818						NaN	NaN	NaN	NaN
-76.1955	-16.6752	-95.2929	-1.17818						NaN	NaN	NaN	NaN
-76.1499	-16.961	-95.2929	-1.17818						NaN	NaN	NaN	NaN
-76.2368	-17.0007	-95.2929	-1.17818						NaN	NaN	NaN	NaN
-76.1181	-17.2982	-95.3026	-1.19284						NaN	NaN	NaN	NaN
-76.1701	-17.2946	-95.3026	-1.19284						NaN	NaN	NaN	NaN
-76.249	-17.5332	-95.3026	-1.19284						NaN	NaN	NaN	NaN
-76.2886	-17.9133	-95.3026	-1.19284						NaN	NaN	NaN	NaN
-76.3887	-17.9065	-95.3026	-1.19284						NaN	NaN	NaN	NaN
-76.2909	-18.2859	-95.3026	-1.19284						NaN	NaN	NaN	NaN
-76.5008	-18.3912	-95.3026	-1.19284						NaN	NaN	NaN	NaN
-76.5918	-18.4076	-95.2883	-1.19664						NaN	NaN	NaN	NaN
-76.5365	-18.5395	-95.2883	-1.19664						NaN	NaN	NaN	NaN
-76.6347	-18.6685	-95.282	-1.20615						NaN	NaN	NaN	NaN
-76.6266	-18.7282	-95.282	-1.20615						NaN	NaN	NaN	NaN
-76.7963	-19.0493	-95.2694	-1.22203						NaN	NaN	NaN	NaN
-76.6823	-19.142	-95.2694	-1.22203						NaN	NaN	NaN	NaN
-76.7448	-19.4539	-95.2694	-1.22203						NaN	NaN	NaN	NaN
-76.8864	-19.6265	-95.3123	-1.21063						NaN	NaN	NaN	NaN
-76.9309	-19.5074	-95.3123	-1.21063						NaN	NaN	NaN	NaN
-76.9814	-19.8698	-95.3123	-1.21063						NaN	NaN	NaN	NaN
-77.0222	-20.0573	-95.3123	-1.21063						NaN	NaN	NaN	NaN
-77.1586	-20.2576	-95.2694	-1.22203						NaN	NaN	NaN	NaN
-77.1472	-20.1203	-95.2474	-1.20002						NaN	NaN	NaN	NaN
-77.1715	-20.3527	-95.2111	-1.20075						NaN	NaN	NaN	NaN
-77.4077	-20.4521	-95.2254	-1.19697						NaN	NaN	NaN	NaN
-77.4912	-20.7184	-95.2397	-1.21212						NaN	NaN	NaN	NaN
-77.4199	-20.5916	-95.2838	-1.23718						NaN	NaN	NaN	NaN
-77.443	-20.7725	-95.2838	-1.23718						NaN	NaN	NaN	NaN
-77.8235	-20.9512	-95.2838	-1.23718						NaN	NaN	NaN	NaN
-77.8426	-20.9542	-95.2838	-1.23718						NaN	NaN	NaN	NaN
-78.2187	-21.0522	-95.2758	-1.2346						NaN	NaN	NaN	NaN
-77.8521	-21.0635	-95.2439	-1.20536						NaN	NaN	NaN	NaN
-78.3867	-20.8488	-95.3405	-1.22553						NaN	NaN	NaN	NaN
-78.1866	-21.0601	-95.3405	-1.22553						NaN	NaN	NaN	NaN
-78.4711	-20.96	-95.2296	-1.20916						NaN	NaN	NaN	NaN
-78.9929	-21.04	-95.2296	-1.20916						NaN	NaN	NaN	NaN
-78.911	-21.0125	-95.2296	-1.20916						NaN	NaN	NaN	NaN
-79.1316	-21.0559	-95.2296	-1.20916						NaN	NaN	NaN	NaN
-79.4399	-21.0206	-95.2296	-1.20916						NaN	NaN	NaN	NaN
-79.2741	-20.9162	-95.2729	-1.24622						NaN	NaN	NaN	NaN
-79.6072	-21.2272	-95.2998	-1.22967						NaN	NaN	NaN	NaN
-79.3222	-21.0934	-95.2998	-1.22967						NaN	NaN	NaN	NaN
-79.4656	-21.1915	-95.35	-1.2073						NaN	NaN	NaN	NaN
-79.7721	-20.8835	-95.3334	-1.14427						NaN	NaN	NaN	NaN
-80.0232	-20.963	-95.3195	-1.16276						NaN	NaN	NaN	NaN
-80.0185	-20.9542	-95.344	-1.22836						NaN	NaN	NaN	NaN
-80.3844	-21.0214	-95.344	-1.22836						NaN	NaN	NaN	NaN
-80.2356	-20.7674	-95.344	-1.22836						NaN	NaN	NaN	NaN
-80.3642	-20.9748	-95.3297	-1.23216						NaN	NaN	NaN	NaN
-80.6521	-20.7235	-95.3154	-1.23596						NaN	NaN	NaN	NaN
-80.6656	-20.8311	-95.3154	-1.23596						NaN	NaN	NaN	NaN
-80.9967	-20.8667	-95.3154	-1.23596						NaN	NaN	NaN	NaN
-80.9378	-20.7622	-95.2933	-1.19499						NaN	NaN	NaN	NaN
-81.1322	-20.8069	-95.2933	-1.19499						NaN	NaN	NaN	NaN
-81.2803	-20.7969	-95.2934	-1.2329						NaN	NaN	NaN	NaN
-81.3582	-20.6058	-95.2951	-1.24499						NaN	NaN	NaN	NaN
-81.4932	-20.5253	-95.2951	-1.24499						NaN	NaN	NaN	NaN
-81.6254	-20.5929	-95.2951	-1.24499						NaN	NaN	NaN	NaN
-81.697	-20.6321	-95.2855	-1.23033						NaN	NaN	NaN	NaN
-81.7346	-20.5294	-95.3042	-1.20178						NaN	NaN	NaN	NaN
-81.7541	-20.3412	-95.3388	-1.19904						NaN	NaN	NaN	NaN
-81.8345	-20.259	-95.3866	-1.1232						NaN	NaN	NaN	NaN
-82.0591	-20.346	-95.5944	-1.06311						NaN	NaN	NaN	NaN
-81.8439	-20.1963	-95.7629	-0.971902						NaN	NaN	NaN	NaN
-82.0222	-19.9756	-95.7836	-0.96427						NaN	NaN	NaN	NaN
-81.8684	-19.9939	-95.9623	-0.896028						NaN	NaN	NaN	NaN
-81.9208	-19.8827	-96.0811	-0.877252						NaN	NaN	NaN	NaN
-81.9513	-19.6255	-96.1651	-0.797965						NaN	NaN	NaN	NaN
-81.7952	-19.2959	-96.2326	-0.764943						NaN	NaN	NaN	NaN
-81.9261	-19.2363	-96.2556	-0.729795						NaN	NaN	NaN	NaN
-81.9945	-19.1364	-96.3128	-0.723183						NaN	NaN	NaN	NaN
-81.9875	-18.7323	-96.3419	-0.725603						NaN	NaN	NaN	NaN
-81.9547	-18.6575	-96.4483	-0.682065						NaN	NaN	NaN	NaN
-81.9908	-18.4058	-96.4533	-0.669483						NaN	NaN	NaN	NaN
-81.8078	-18.3035	-96.4652	-0.65636						NaN	NaN	NaN	NaN
-81.8516	-17.9666	-96.5436	-0.62748						NaN	NaN	NaN	NaN
-81.7867	-17.8022	-96.576	-0.599503						NaN	NaN	NaN	NaN
-81.713	-17.7678	-96.5977	-0.601065						NaN	NaN	NaN	NaN
-81.7909	-17.6246	-96.6047	-0.619392						NaN	NaN	NaN	NaN
-81.8239	-17.6221	-96.6047	-0.638254						NaN	NaN	NaN	NaN
-81.6788	-17.3913	-96.6935	-0.647459						NaN	NaN	NaN	NaN
-81.7527	-17.4237	-96.7504	-0.656213						NaN	NaN	NaN	NaN
-81.7322	-17.2299	-96.8221	-0.644596						NaN	NaN	NaN	NaN
-81.6806	-17.2348	-96.8708	-0.598818						NaN	NaN	NaN	NaN
-81.6385	-17.2371	-96.9135	-0.59219						NaN	NaN	NaN	NaN
-81.7934	-17.0748	-97.0819	-0.640962						NaN	NaN	NaN	NaN
-81.5837	-16.848	-97.4949	-0.633189						NaN	NaN	NaN	NaN
-81.9011	-16.9903	-98.5405	-0.73692						NaN	NaN	NaN	NaN
-81.823	-16.7601	-99.6869	-0.894821						NaN	NaN	NaN	NaN
-81.9428	-16.9038	-100.443	-0.910246						NaN	NaN	NaN	NaN
-81.7902	-16.6356	-101.319	-0.990293						NaN	NaN	NaN	NaN
-81.951	-16.6179	-102.263	-1.11053						NaN	NaN	NaN	NaN
-82.1344	-16.7906	-102.846	-1.11526						NaN	NaN	NaN	NaN
-82.1618	-16.4888	-103.686	-1.10156						NaN	NaN	NaN	NaN
-82.5282	-16.3489	-104.566	-1.22046						NaN	NaN	NaN	NaN
-82.4324	-16.2623	-105.54	-1.34423						NaN	NaN	NaN	NaN
-82.4319	-16.0463	-106.308	-1.44033						NaN	NaN	NaN	NaN
-82.601	-15.9682	-107.029	-1.44843						NaN	NaN	NaN	NaN
-82.7836	-15.934	-107.856	-1.5834						NaN	NaN	NaN	NaN
-82.8902	-15.8288	-108.788	-1.64396						NaN	NaN	NaN	NaN
-83.1097	-15.7447	-109.606	-1.69352						NaN	NaN	NaN	NaN
-83.1948	-15.3926	-110.3	-1.79891						NaN	NaN	NaN	NaN
-83.258	-15.535	-111.392	-1.88248						NaN	NaN	NaN	NaN
-83.4192	-15.3249	-112.225	-2.00479						NaN	NaN	NaN	NaN
-83.4989	-15.302	-112.735	-2.01516						NaN	NaN	NaN	NaN
-83.6937	-15.1714	-113.091	-2.00529						NaN	NaN	NaN	NaN
-83.8251	-14.9409	-113.278	-2.0589						NaN	NaN	NaN	NaN
-83.9762	-14.9383	-113.392	-2.05128						NaN	NaN	NaN	NaN
-84.0996	-14.832	-113.37	-2.06363						NaN	NaN	NaN	NaN
-84.3437	-14.5972	-113.29	-2.06423						NaN	NaN	NaN	NaN
-84.3566	-14.4636	-113.291	-2.06026						NaN	NaN	NaN	NaN
-84.5368	-14.3199	-113.199	-2.20147						NaN	NaN	NaN	NaN
-84.7173	-14.2135	-113.255	-2.34795						NaN	NaN	NaN	NaN
-84.7158	-13.8863	-113.14	-2.38527						NaN	NaN	NaN	NaN
-84.9714	-14.0075	-113.023	-2.45136						NaN	NaN	NaN	NaN
-85.0365	-13.7295	-112.888	-2.5084						NaN	NaN	NaN	NaN
-85.0294	-13.4641	-112.835	-2.61211						NaN	NaN	NaN	NaN
-85.2914	-13.3616	-112.836	-2.67573						NaN	NaN	NaN	NaN
-85.5091	-13.4209	-112.641	-2.72396						NaN	NaN	NaN	NaN
-85.7832	-13.1904	-112.511	-2.73417						NaN	NaN	NaN	NaN
-85.7284	-12.8148	-112.445	-2.77482						NaN	NaN	NaN	NaN
-85.9541	-12.7644	-112.199	-2.90415						NaN	NaN	NaN	NaN
-86.211	-12.6836	-112.122	-2.90993						NaN	NaN	NaN	NaN
-86.3727	-12.587	-112	-3.0037						NaN	NaN	NaN	NaN
-86.3767	-12.3405	-111.948	-3.11644						NaN	NaN	NaN	NaN
-86.4863	-12.2598	-111.677	-3.12798						NaN	NaN	NaN	NaN
-86.5855	-12.2721	-111.562	-3.15598						NaN	NaN	NaN	NaN
-86.8002	-11.9851	-111.423	-3.09638						NaN	NaN	NaN	NaN
-86.8699	-11.6573	-111.242	-3.1731						NaN	NaN	NaN	NaN
-87.0338	-11.7387	-110.917	-3.35376						NaN	NaN	NaN	NaN
-87.3157	-11.7586	-110.801	-3.45831						NaN	NaN	NaN	NaN
-87.3985	-11.6411	-110.532	-3.61886						NaN	NaN	NaN	NaN
-87.6037	-11.3619	-110.417	-3.71681						NaN	NaN	NaN	NaN
-87.6259	-11.2472	-109.989	-3.79576						NaN	NaN	NaN	NaN
-87.8343	-11.1444	-109.831	-3.87687						NaN	NaN	NaN	NaN
-88.0376	-11.1139	-109.674	-3.91852						NaN	NaN	NaN	NaN
-88.2556	-10.9626	-109.523	-4.08169						NaN	NaN	NaN	NaN
-88.304	-11.0237	-109.388	-4.21228						NaN	NaN	NaN	NaN
-88.4769	-10.8778	-109.226	-4.29673						NaN	NaN	NaN	NaN
-88.7642	-10.8524	-108.872	-4.39361						NaN	NaN	NaN	NaN
-88.9825	-10.8862	-108.631	-4.44724						NaN	NaN	NaN	NaN
-89.1467	-10.8062	-108.473	-4.52565						NaN	NaN	NaN	NaN
-89.2621	-10.7634	-108.238	-4.65565						NaN	NaN	NaN	NaN
-89.5041	-10.8007	-108.142	-4.72593						NaN	NaN	NaN	NaN
-89.7385	-10.7631	-107.771	-4.82033						NaN	NaN	NaN	NaN
-89.9062	-10.7093	-107.579	-4.87016						NaN	NaN	NaN	NaN
-90.1582	-10.778	-107.44	-4.93133						NaN	NaN	NaN	NaN
-90.5586	-10.7526	-107.314	-4.94881						NaN	NaN	NaN	NaN
-90.6071	-10.7599	-107.302	-4.95408						NaN	NaN	NaN	NaN
-90.9192	-10.5593	-107.223	-4.99085						NaN	NaN	NaN	NaN
-90.9362	-10.4866	-107.18	-4.88879						NaN	NaN	NaN	NaN
-91.2982	-10.5074	-107.128	-4.85853						NaN	NaN	NaN	NaN
-91.7879	-10.371	-107.01	-5.00139						NaN	NaN	NaN	NaN
-91.9609	-10.4912	-107.082	-4.96822						NaN	NaN	NaN	NaN
-92.0103	-10.2972	-107.038	-4.92748						NaN	NaN	NaN	NaN
-92.4587	-10.5318	-106.924	-4.99452						NaN	NaN	NaN	NaN
-92.5819	-10.3862	-106.921	-4.99714						NaN	NaN	NaN	NaN
-92.7277	-10.2099	-106.921	-5.03291						NaN	NaN	NaN	NaN
-93.117	-10.3124	-106.944	-5.00058						NaN	NaN	NaN	NaN
-93.299	-10.2824	-106.944	-5.00058						NaN	NaN	NaN	NaN
-93.5234	-10.2154	-106.944	-5.03636						NaN	NaN	NaN	NaN
-93.7308	-10.0922	-106.999	-5.09821						NaN	NaN	NaN	NaN
-94.0156	-10.0607	-107.016	-5.11968						NaN	NaN	NaN	NaN
-94.3289	-10.0526	-107.016	-5.11968						NaN	NaN	NaN	NaN
-94.8226	-10.0848	-107.016	-5.11968						NaN	NaN	NaN	NaN
-95.0603	-10.1219	-107.036	-5.05009						NaN	NaN	NaN	NaN
-95.2688	-10.1049	-107.021	-5.0677						NaN	NaN	NaN	NaN
-95.5073	-9.96896	-107.036	-5.11903						NaN	NaN	NaN	NaN
-95.7219	-9.94721	-107.036	-5.11903						NaN	NaN	NaN	NaN
-96.1063	-9.85526	-107.097	-5.20361						NaN	NaN	NaN	NaN
-96.4477	-9.70522	-107.097	-5.20361						NaN	NaN	NaN	NaN
-96.7469	-9.7441	-107.059	-5.20459						NaN	NaN	NaN	NaN
-96.9177	-9.71403	-107.044	-5.20559						NaN	NaN	NaN	NaN
-97.1534	-9.66619	-106.985	-5.20377						NaN	NaN	NaN	NaN
-97.5251	-9.50137	-106.986	-5.17072						NaN	NaN	NaN	NaN
-97.8526	-9.38332	-107.045	-5.17052						NaN	NaN	NaN	NaN
-97.886	-9.23685	-107.027	-5.12929						NaN	NaN	NaN	NaN
-98.4428	-9.09907	-107.027	-5.12929						NaN	NaN	NaN	NaN
-98.6244	-8.94466	-107.041	-5.12487						NaN	NaN	NaN	NaN
-98.8655	-8.89508	-107.041	-5.12487						NaN	NaN	NaN	NaN
-99.1231	-8.76777	-107.041	-5.12487						NaN	NaN	NaN	NaN
-99.4686	-8.76088	-107.041	-5.12487						NaN	NaN	NaN	NaN
-99.6465	-8.43267	-107.041	-5.12487						NaN	NaN	NaN	NaN
-99.9626	-8.30509	-107.041	-5.12487						NaN	NaN	NaN	NaN
-100.18	-8.18695	-107.041	-5.12487						NaN	NaN	NaN	NaN
-100.471	-8.1757	-107.041	-5.12487						NaN	NaN	NaN	NaN
-100.618	-8.00894	-107.041	-5.12487						NaN	NaN	NaN	NaN
-100.729	-7.98416	-107.041	-5.12487						NaN	NaN	NaN	NaN
-101.139	-7.80312	-107.041	-5.12487						NaN	NaN	NaN	NaN
-101.227	-7.76831	-107.041	-5.12487						NaN	NaN	NaN	NaN
-101.626	-7.59067	-107.041	-5.12487						NaN	NaN	NaN	NaN
-101.783	-7.49899	-107.063	-5.13289						NaN	NaN	NaN	NaN
-102.129	-7.43495	-107.063	-5.13289						NaN	NaN	NaN	NaN
-102.315	-7.29016	-107.077	-5.12845						NaN	NaN	NaN	NaN
-102.581	-7.23184	-107.077	-5.12845						NaN	NaN	NaN	NaN
-102.792	-7.15255	-107.077	-5.07371						NaN	NaN	NaN	NaN
-103.209	-7.0475	-107.102	-5.0264						NaN	NaN	NaN	NaN
-103.5	-6.88727	-107.091	-4.81825						NaN	NaN	NaN	NaN
-103.863	-6.81222	-107.066	-4.60164						NaN	NaN	NaN	NaN
-104.016	-6.69555	-107.168	-4.34358						NaN	NaN	NaN	NaN
-104.26	-6.49839	-107.226	-4.12905						NaN	NaN	NaN	NaN
-104.629	-6.5067	-107.284	-3.92592						NaN	NaN	NaN	NaN
-104.736	-6.44043	-107.28	-3.70926						NaN	NaN	NaN	NaN
-105.051	-6.16719	-107.375	-3.61608						NaN	NaN	NaN	NaN
-105.272	-6.24449	-107.594	-3.43854						NaN	NaN	NaN	NaN
-105.498	-6.02338	-107.813	-3.23299						NaN	NaN	NaN	NaN
-105.751	-5.91564	-108.137	-2.74095						NaN	NaN	NaN	NaN
-105.843	-5.70461	-108.266	-2.41013						NaN	NaN	NaN	NaN
-106.039	-5.62643	-108.559	-1.93284						NaN	NaN	NaN	NaN
-106.203	-5.56597	-108.742	-1.68904						NaN	NaN	NaN	NaN
-106.533	-5.49732	-109.096	-1.34456						NaN	NaN	NaN	NaN
-106.796	-5.24934	-109.343	-1.02761						NaN	NaN	NaN	NaN
-107.004	-5.03408	-109.565	-0.638659						NaN	NaN	NaN	NaN
-106.929	-4.77545	-109.835	-0.353255						NaN	NaN	NaN	NaN
-107.196	-4.51761	-110.059	-0.0265811						NaN	NaN	NaN	NaN
-107.399	-4.4334	-110.28	0.217042						NaN	NaN	NaN	NaN
-107.518	-4.16894	-110.626	0.567569						NaN	NaN	NaN	NaN
-107.674	-4.1099	-110.787	0.883277						NaN	NaN	NaN	NaN
-107.545	-3.77265	-111.429	1.31485						NaN	NaN	NaN	NaN
-107.832	-3.67879	-111.662	1.68058						NaN	NaN	NaN	NaN
-108.047	-3.3249	-111.927	1.95823						NaN	NaN	NaN	NaN
-108.07	-3.38212	-112.133	2.42468						NaN	NaN	NaN	NaN
-108.221	-3.4667	-112.562	2.69536						NaN	NaN	NaN	NaN
-108.168	-3.1985	-112.748	2.96642						NaN	NaN	NaN	NaN
-108.438	-2.96728	-113.017	3.20859						NaN	NaN	NaN	NaN
-108.491	-2.67601	-113.156	3.44977						NaN	NaN	NaN	NaN
-108.531	-2.67698	-113.492	3.73557						NaN	NaN	NaN	NaN
-108.412	-2.41981	-113.627	4.00694						NaN	NaN	NaN	NaN
-108.605	-2.39544	-113.668	4.10871						NaN	NaN	NaN	NaN
-108.602	-2.32499	-113.444	4.22902						NaN	NaN	NaN	NaN
-108.546	-2.27602	-113.358	4.23427						NaN	NaN	NaN	NaN
-108.839	-2.26326	-113.186	4.28031						NaN	NaN	NaN	NaN
-108.705	-2.45756	-113.104	4.40719						NaN	NaN	NaN	NaN
-108.801	-2.32139	-112.916	4.47675						NaN	NaN	NaN	NaN
-108.826	-2.29661	-112.899	4.59559						NaN	NaN	NaN	NaN
-108.864	-2.29213	-112.752	4.71562						NaN	NaN	NaN	NaN
-108.971	-2.37546	-112.718	4.7902						NaN	NaN	NaN	NaN
-109.183	-2.22856	-112.763	4.95046						NaN	NaN	NaN	NaN
-109.179	-2.25985	-112.97	5.0594						NaN	NaN	NaN	NaN
-109.191	-2.27911	-112.967	5.15741						NaN	NaN	NaN	NaN
-109.353	-2.27486	-112.968	5.15742						NaN	NaN	NaN	NaN
-109.309	-2.04927	-113.026	5.26677						NaN	NaN	NaN	NaN
-109.273	-2.13817	-113.038	5.31181						NaN	NaN	NaN	NaN
-109.491	-2.04889	-113.148	5.47082						NaN	NaN	NaN	NaN
-109.533	-1.97231	-113.159	5.47476						NaN	NaN	NaN	NaN
-109.494	-1.99117	-113.239	5.57874						NaN	NaN	NaN	NaN
-109.487	-1.84114	-113.278	5.62372						NaN	NaN	NaN	NaN
-109.623	-1.75475	-113.3	5.68478						NaN	NaN	NaN	NaN
-109.765	-1.65921	-113.35	5.72582						NaN	NaN	NaN	NaN
-109.941	-1.53535	-113.334	5.65628						NaN	NaN	NaN	NaN
-109.907	-1.48754	-113.294	5.61134						NaN	NaN	NaN	NaN
-110.012	-1.3942	-113.42	5.64454						NaN	NaN	NaN	NaN
-109.954	-1.20322	-113.402	5.62055						NaN	NaN	NaN	NaN
-110.011	-0.9715	-113.379	5.62503						NaN	NaN	NaN	NaN
-110.115	-0.897292	-113.435	5.56959						NaN	NaN	NaN	NaN
-110.212	-0.848825	-113.429	5.55773						NaN	NaN	NaN	NaN
-110.248	-0.564332	-113.409	5.54325						NaN	NaN	NaN	NaN
-110.334	-0.629159	-113.383	5.53586						NaN	NaN	NaN	NaN
-110.352	-0.376837	-113.405	5.54086						NaN	NaN	NaN	NaN
-110.545	-0.219174	-113.468	5.55598						NaN	NaN	NaN	NaN
-110.54	-0.200938	-113.457	5.59472						NaN	NaN	NaN	NaN
-110.649	-0.1423	-113.434	5.63043						NaN	NaN	NaN	NaN
-110.684	0.0250123	-113.474	5.68093						NaN	NaN	NaN	NaN
-110.668	0.235567	-113.515	5.70613						NaN	NaN	NaN	NaN
-110.63	0.484537	-113.612	5.69938						NaN	NaN	NaN	NaN
-110.857	0.604656	-113.6	5.70483						NaN	NaN	NaN	NaN
-110.897	0.773828	-113.621	5.72958						NaN	NaN	NaN	NaN
-110.853	0.932401	-113.66	5.77832						NaN	NaN	NaN	NaN
-111.038	1.03966	-113.66	5.77832						NaN	NaN	NaN	NaN
-111.218	1.25142	-113.615	5.78899						NaN	NaN	NaN	NaN
-111.049	1.37776	-113.561	5.78895						NaN	NaN	NaN	NaN
-111.17	1.42773	-113.469	5.90755						NaN	NaN	NaN	NaN
-111.226	1.4206	-113.469	5.90755						NaN	NaN	NaN	NaN
-111.18	1.53296	-113.402	5.93847						NaN	NaN	NaN	NaN
-111.185	1.44374	-113.367	6.04145						NaN	NaN	NaN	NaN
-111.253	1.36138	-113.4	6.05515						NaN	NaN	NaN	NaN
-111.28	1.40274	-113.398	6.06471						NaN	NaN	NaN	NaN
-111.261	1.62396	-113.387	6.07849						NaN	NaN	NaN	NaN
-111.231	1.6967	-113.449	6.11276						NaN	NaN	NaN	NaN
-111.245	1.69865	-113.426	6.11732						NaN	NaN	NaN	NaN
-111.265	1.84236	-113.537	6.20342						NaN	NaN	NaN	NaN
-111.157	2.09589	-113.547	6.21888						NaN	NaN	NaN	NaN
-111.253	2.05211	-113.631	6.25834						NaN	NaN	NaN	NaN
-111.322	2.11209	-113.553	6.30165						NaN	NaN	NaN	NaN
-111.356	2.23167	-113.604	6.35149						NaN	NaN	NaN	NaN
-111.411	2.14572	-113.57	6.39559						NaN	NaN	NaN	NaN
-111.377	2.42356	-113.57	6.39559						NaN	NaN	NaN	NaN
-111.422	2.40475	-113.57	6.39559						NaN	NaN	NaN	NaN
-111.52	2.47166	-113.559	6.41028						NaN	NaN	NaN	NaN
-111.707	2.5459	-113.559	6.41028						NaN	NaN	NaN	NaN
-111.708	2.57486	-113.57	6.40478						NaN	NaN	NaN	NaN
-111.906	2.6036	-113.57	6.40478						NaN	NaN	NaN	NaN
-111.896	2.72307	-113.573	6.36531						NaN	NaN	NaN	NaN
-111.925	2.85487	-113.573	6.36531						NaN	NaN	NaN	NaN
-112.056	2.90329	-113.608	6.32496						NaN	NaN	NaN	NaN
-111.931	2.81126	-113.546	6.29054						NaN	NaN	NaN	NaN
-111.876	2.91288	-113.58	6.25563						NaN	NaN	NaN	NaN
-111.91	3.29284	-113.591	6.2317						NaN	NaN	NaN	NaN
-111.944	3.45616	-113.591	6.2317						NaN	NaN	NaN	NaN
-111.899	3.65988	-113.591	6.2317						NaN	NaN	NaN	NaN
-112.002	3.53439	-113.614	6.22071						NaN	NaN	NaN	NaN
-111.94	3.8046	-113.614	6.22071						NaN	NaN	NaN	NaN
-111.921	4.00083	-113.614	6.22071						NaN	NaN	NaN	NaN
-111.95	4.10507	-113.572	6.20101						NaN	NaN	NaN	NaN
-112.042	4.23086	-113.572	6.20101						NaN	NaN	NaN	NaN
-112.02	4.2536	-113.572	6.20101						NaN	NaN	NaN	NaN
-112.089	4.42466	-113.572	6.20101						NaN	NaN	NaN	NaN
-112.076	4.5013	-113.572	6.20101						NaN	NaN	NaN	NaN
-112.099	4.54264	-113.572	6.20101						NaN	NaN	NaN	NaN
-112.14	4.90643	-113.572	6.20101						NaN	NaN	NaN	NaN
-112.075	4.71348	-113.593	6.20605						NaN	NaN	NaN	NaN
-112.179	4.83453	-113.537	6.24274						NaN	NaN	NaN	NaN
-112.165	5.07474	-113.589	6.26659						NaN	NaN	NaN	NaN
-112.152	5.23576	-113.589	6.26659						NaN	NaN	NaN	NaN
-112.158	5.3224	-113.589	6.26659						NaN	NaN	NaN	NaN
-112.145	5.31452	-113.589	6.26659						NaN	NaN	NaN	NaN
-112.112	5.36711	-113.567	6.26155						NaN	NaN	NaN	NaN
-112.188	5.43745	-113.567	6.28919						NaN	NaN	NaN	NaN
-112.106	5.46748	-113.556	6.26705						NaN	NaN	NaN	NaN
-112.083	5.63646	-113.59	6.25978						NaN	NaN	NaN	NaN
-112.117	5.57575	-113.578	6.27448						NaN	NaN	NaN	NaN
-112.117	5.58828	-113.578	6.27448						NaN	NaN	NaN	NaN
-112.058	5.62658	-113.567	6.27998						NaN	NaN	NaN	NaN
-112.062	5.63294	-113.587	6.29467						NaN	NaN	NaN	NaN
-111.963	5.5201	-113.56	6.26474						NaN	NaN	NaN	NaN
-111.945	5.69034	-113.581	6.26979						NaN	NaN	NaN	NaN
-111.919	5.73752	-113.581	6.26979						NaN	NaN	NaN	NaN
-111.899	5.90507	-113.581	6.26979						NaN	NaN	NaN	NaN
-111.806	5.89336	-113.581	6.26979						NaN	NaN	NaN	NaN
-111.822	5.88842	-113.603	6.27484						NaN	NaN	NaN	NaN
-111.839	5.88015	-113.591	6.28954						NaN	NaN	NaN	NaN
-111.82	5.92092	-113.591	6.28954						NaN	NaN	NaN	NaN
-111.818	5.97639	-113.613	6.2946						NaN	NaN	NaN	NaN
-111.821	5.94775	-113.379	6.28548						NaN	NaN	NaN	NaN
-111.881	6.22888	-113.384	6.3919						NaN	NaN	NaN	NaN
-111.89	6.09367	-112.988	6.35449						NaN	NaN	NaN	NaN
-111.919	6.238	-112.486	6.8524						NaN	NaN	NaN	NaN
-111.937	6.18495	-112.173	7.04615						NaN	NaN	NaN	NaN
-111.939	6.12755	-111.712	7.33707						NaN	NaN	NaN	NaN
-111.974	6.22684	-110.772	7.34964						NaN	NaN	NaN	NaN
-112.007	6.49403	-110.534	7.57512						NaN	NaN	NaN	NaN
-112.012	6.45259	-110.347	7.60578						NaN	NaN	NaN	NaN
-112.023	6.39328	-109.761	7.66268						NaN	NaN	NaN	NaN
-112.021	6.39863	-109.207	7.73428						NaN	NaN	NaN	NaN
-112.016	6.22568	-108.755	7.98741						NaN	NaN	NaN	NaN
-112.068	6.28638	-108.408	8.20898						NaN	NaN	NaN	NaN
-112.142	6.31451	-107.843	8.42056						NaN	NaN	NaN	NaN
-112.113	6.50626	-107.466	8.48688						NaN	NaN	NaN	NaN
-112.163	6.26851	-106.909	8.70141						NaN	NaN	NaN	NaN
-112.179	6.22002	-106.561	8.75772						NaN	NaN	NaN	NaN
-112.166	6.18513	-106.154	8.80543						NaN	NaN	NaN	NaN
-112.133	6.23803	-105.71	9.02561						NaN	NaN	NaN	NaN
-112.138	6.15443	-105.281	9.17188						NaN	NaN	NaN	NaN
-112.118	6.1925	-104.981	9.29587						NaN	NaN	NaN	NaN
-112.111	6.20752	-104.579	9.44605						NaN	NaN	NaN	NaN
-112.089	6.46514	-104.201	9.5825						NaN	NaN	NaN	NaN
-112.074	6.31783	-103.823	9.65714						NaN	NaN	NaN	NaN
-112.093	6.36967	-103.436	9.79613						NaN	NaN	NaN	NaN
-112.088	6.3451	-102.993	9.95215						NaN	NaN	NaN	NaN
-112.099	6.49229	-102.563	10.1601						NaN	NaN	NaN	NaN
-112.1	6.55446	-102.218	10.2644						NaN	NaN	NaN	NaN
-112.162	6.57035	-101.719	10.4564						NaN	NaN	NaN	NaN
-112.134	6.53042	-101.338	10.5875						NaN	NaN	NaN	NaN
-112.201	6.66216	-100.899	10.7386						NaN	NaN	NaN	NaN
-112.21	6.77499	-100.522	10.9872						NaN	NaN	NaN	NaN
-112.241	6.81395	-100.149	11.0287						NaN	NaN	NaN	NaN
-112.266	6.78484	-99.7628	11.2194						NaN	NaN	NaN	NaN
-112.325	6.80543	-99.2141	11.4152						NaN	NaN	NaN	NaN
-112.305	6.8214	-98.8343	11.5268						NaN	NaN	NaN	NaN
-112.302	6.81663	-98.5471	11.5592						NaN	NaN	NaN	NaN
-112.319	6.86053	-98.0935	11.6922						NaN	NaN	NaN	NaN
-112.405	6.99493	-97.7584	11.8128						NaN	NaN	NaN	NaN
-112.39	6.92309	-97.3223	11.9533						NaN	NaN	NaN	NaN
-112.425	6.98197	-96.8352	12.1697						NaN	NaN	NaN	NaN
-112.389	6.88715	-96.5982	12.2699						NaN	NaN	NaN	NaN
-112.366	7.04797	-96.2278	12.3167						NaN	NaN	NaN	NaN
-112.37	7.08099	-95.8049	12.468						NaN	NaN	NaN	NaN
-112.314	7.08326	-95.2369	12.6951						NaN	NaN	NaN	NaN
-112.291	7.04129	-94.9083	12.8188						NaN	NaN	NaN	NaN
-112.253	6.94515	-94.5236	12.9346						NaN	NaN	NaN	NaN
-112.246	7.00118	-94.1762	13.1						NaN	NaN	NaN	NaN
-112.201	7.1483	-93.7017	13.2055						NaN	NaN	NaN	NaN
-112.166	7.03798	-93.2588	13.3246						NaN	NaN	NaN	NaN
-112.15	7.16713	-92.9462	13.3961						NaN	NaN	NaN	NaN
-112.116	7.39676	-92.4653	13.6134						NaN	NaN	NaN	NaN
-112.091	7.19855	-92.1281	13.7074						NaN	NaN	NaN	NaN
-112.07	7.29717	-91.7955	13.8589						NaN	NaN	NaN	NaN
-112.104	7.23616	-91.4362	13.9523						NaN	NaN	NaN	NaN
-112.013	7.16839	-91.0269	14.0927						NaN	NaN	NaN	NaN
-112.032	7.20525	-90.7591	14.2053						NaN	NaN	NaN	NaN
-112.013	7.17763	-90.675	14.1928						NaN	NaN	NaN	NaN
-111.986	7.17398	-90.6961	14.3012						NaN	NaN	NaN	NaN
-111.991	7.24749	-90.7703	14.2396						NaN	NaN	NaN	NaN
-111.957	7.20521	-90.7924	14.2414						NaN	NaN	NaN	NaN
-111.992	7.22699	-90.8263	14.2782						NaN	NaN	NaN	NaN
-111.878	7.24847	-90.8364	14.3387						NaN	NaN	NaN	NaN
-111.884	7.23056	-90.8896	14.3188						NaN	NaN	NaN	NaN
-111.874	7.34157	-90.8918	14.4094						NaN	NaN	NaN	NaN
-111.86	7.28072	-90.8912	14.4247						NaN	NaN	NaN	NaN
-111.953	7.45859	-90.926	14.4215						NaN	NaN	NaN	NaN
-111.851	7.3163	-90.9696	14.4151						NaN	NaN	NaN	NaN
-111.863	7.28894	-90.95	14.4469						NaN	NaN	NaN	NaN
-111.87	7.28493	-90.994	14.5119						NaN	NaN	NaN	NaN
-111.729	7.36917	-90.9998	14.5695						NaN	NaN	NaN	NaN
-111.745	7.33671	-91.0444	14.6673						NaN	NaN	NaN	NaN
-111.711	7.1922	-90.9705	14.7119						NaN	NaN	NaN	NaN
-111.752	7.20142	-91.0353	14.7106						NaN	NaN	NaN	NaN
-111.648	7.41592	-90.9999	14.7241						NaN	NaN	NaN	NaN
-111.612	7.34239	-90.9439	14.7312						NaN	NaN	NaN	NaN
-111.623	7.21029	-90.8412	14.7222						NaN	NaN	NaN	NaN
-111.612	7.24549	-90.7318	14.72						NaN	NaN	NaN	NaN
-111.558	7.27496	-90.6301	14.6335						NaN	NaN	NaN	NaN
-111.518	7.22317	-90.6314	14.6932						NaN	NaN	NaN	NaN
-111.434	7.13735	-90.5767	14.6159						NaN	NaN	NaN	NaN
-111.382	7.09709	-90.6097	14.5288						NaN	NaN	NaN	NaN
-111.376	7.1933	-90.4986	14.5356						NaN	NaN	NaN	NaN
-111.31	7.03286	-90.5158	14.5391						NaN	NaN	NaN	NaN
-111.293	7.02944	-90.4849	14.5273						NaN	NaN	NaN	NaN
-111.272	6.9685	-90.3842	14.5416						NaN	NaN	NaN	NaN
-111.211	7.02141	-90.4254	14.541						NaN	NaN	NaN	NaN
-111.226	6.96916	-90.4592	14.5794						NaN	NaN	NaN	NaN
-111.147	6.85516	-90.5548	14.6363						NaN	NaN	NaN	NaN
-111.059	6.7887	-90.5023	14.5784						NaN	NaN	NaN	NaN
-111.092	6.84191	-90.4291	14.5616						NaN	NaN	NaN	NaN
-110.982	6.88515	-90.366	14.564						NaN	NaN	NaN	NaN
-110.917	6.76718	-90.3448	14.5629						NaN	NaN	NaN	NaN
-110.863	6.75612	-90.3096	14.5611						NaN	NaN	NaN	NaN
-110.777	6.76948	-90.2713	14.5537						NaN	NaN	NaN	NaN
-110.727	6.68481	-89.6744	14.409						NaN	NaN	NaN	NaN
-110.673	6.56554	-88.8992	14.2557						NaN	NaN	NaN	NaN
-110.634	6.60315	-88.0305	14.0639						NaN	NaN	NaN	NaN
-110.543	6.46844	-87.3716	13.9398						NaN	NaN	NaN	NaN
-110.436	6.34536	-86.5869	13.8433						NaN	NaN	NaN	NaN
-110.424	6.3275	-85.7412	13.6426						NaN	NaN	NaN	NaN
-110.379	6.19671	-85.0231	13.4836						NaN	NaN	NaN	NaN
-110.295	6.26073	-84.247	13.2767						NaN	NaN	NaN	NaN
-110.309	6.25629	-83.497	13.0902						NaN	NaN	NaN	NaN
-110.262	6.20717	-82.7145	13.0205						NaN	NaN	NaN	NaN
-110.154	6.04993	-81.979	12.7651						NaN	NaN	NaN	NaN
-110.084	6.03096	-81.1543	12.519						NaN	NaN	NaN	NaN
-110.003	6.02955	-80.4201	12.424						NaN	NaN	NaN	NaN
-109.924	5.9458	-79.6662	12.2476						NaN	NaN	NaN	NaN
-109.893	5.91398	-78.9461	12.1293						NaN	NaN	NaN	NaN
-109.91	5.79074	-78.162	11.9152						NaN	NaN	NaN	NaN
-109.858	5.7607	-77.338	11.7649						NaN	NaN	NaN	NaN
-109.821	5.74209	-76.6145	11.6161						NaN	NaN	NaN	NaN
-109.768	5.49713	-75.8583	11.4643						NaN	NaN	NaN	NaN
-109.653	5.37575	-75.1386	11.2176						NaN	NaN	NaN	NaN
-109.608	5.30228	-74.3908	11.0712						NaN	NaN	NaN	NaN
-109.6	5.31792	-73.6969	10.8888						NaN	NaN	NaN	NaN
-109.594	5.27481	-72.913	10.7235						NaN	NaN	NaN	NaN
-109.474	5.20435	-72.1558	10.5652						NaN	NaN	NaN	NaN
-109.406	5.0827	-71.4712	10.3891						NaN	NaN	NaN	NaN
-109.453	5.07958	-70.7046	10.1805						NaN	NaN	NaN	NaN
-109.383	4.96943	-70.0235	10.0215						NaN	NaN	NaN	NaN
-109.288	5.09243	-69.2456	9.91727						NaN	NaN	NaN	NaN
-109.252	5.0579	-68.4111	9.78353						NaN	NaN	NaN	NaN
-109.21	4.96273	-67.5353	9.49115						NaN	NaN	NaN	NaN
-109.102	4.86487	-66.876	9.36652						NaN	NaN	NaN	NaN
NaN	NaN	-65.9688	9.13019						NaN	NaN	NaN	NaN
NaN	NaN	-65.3946	8.90883						NaN	NaN	NaN	NaN
NaN	NaN	-64.8583	8.74083						NaN	NaN	NaN	NaN
NaN	NaN	-64.5941	8.49975						NaN	NaN	NaN	NaN
NaN	NaN	-64.3236	8.40133						NaN	NaN	NaN	NaN
NaN	NaN	-64.2693	8.27165						NaN	NaN	NaN	NaN
NaN	NaN	-64.1631	8.21805						NaN	NaN	NaN	NaN
NaN	NaN	-64.1899	8.28247						NaN	NaN	NaN	NaN
NaN	NaN	-64.276	8.30799						NaN	NaN	NaN	NaN
NaN	NaN	-64.2971	8.34862						NaN	NaN	NaN	NaN
NaN	NaN	-64.3586	8.39392						NaN	NaN	NaN	NaN
NaN	NaN	-64.3903	8.45045						NaN	NaN	NaN	NaN
NaN	NaN	-64.3903	8.45045						NaN	NaN	NaN	NaN
NaN	NaN	-64.3651	8.48833						NaN	NaN	NaN	NaN
NaN	NaN	-64.3961	8.51775						NaN	NaN	NaN	NaN
NaN	NaN	-64.4272	8.54715						NaN	NaN	NaN	NaN
NaN	NaN	-64.4272	8.54715						NaN	NaN	NaN	NaN
NaN	NaN	-64.4272	8.54715						NaN	NaN	NaN	NaN
NaN	NaN	-64.4272	8.54715						NaN	NaN	NaN	NaN
NaN	NaN	-64.4272	8.54715						NaN	NaN	NaN	NaN
NaN	NaN	-64.4211	8.59469						NaN	NaN	NaN	NaN
NaN	NaN	-64.4088	8.63918						NaN	NaN	NaN	NaN
NaN	NaN	-64.4211	8.59469						NaN	NaN	NaN	NaN
NaN	NaN	-64.4211	8.59469						NaN	NaN	NaN	NaN
NaN	NaN	-64.4147	8.59157						NaN	NaN	NaN	NaN
NaN	NaN	-64.399	8.60915						NaN	NaN	NaN	NaN
NaN	NaN	-64.4088	8.63918						NaN	NaN	NaN	NaN
NaN	NaN	-64.4215	8.64535						NaN	NaN	NaN	NaN
NaN	NaN	-64.4215	8.64535						NaN	NaN	NaN	NaN
NaN	NaN	-64.4484	8.62066						NaN	NaN	NaN	NaN
NaN	NaN	-64.4448	8.54307						NaN	NaN	NaN	NaN
NaN	NaN	-64.4747	8.53169						NaN	NaN	NaN	NaN
NaN	NaN	-64.4747	8.53169						NaN	NaN	NaN	NaN
NaN	NaN	-64.4747	8.53169						NaN	NaN	NaN	NaN
NaN	NaN	-64.4717	8.55547						NaN	NaN	NaN	NaN
NaN	NaN	-64.5012	8.53051						NaN	NaN	NaN	NaN
NaN	NaN	-64.5012	8.53051						NaN	NaN	NaN	NaN
NaN	NaN	-64.5012	8.53051						NaN	NaN	NaN	NaN
NaN	NaN	-64.5012	8.53051						NaN	NaN	NaN	NaN
NaN	NaN	-64.5315	8.53274						NaN	NaN	NaN	NaN
NaN	NaN	-64.5315	8.53274						NaN	NaN	NaN	NaN
NaN	NaN	-64.5315	8.53274						NaN	NaN	NaN	NaN
NaN	NaN	-64.5915	8.52361						NaN	NaN	NaN	NaN
NaN	NaN	-64.5824	8.54421						NaN	NaN	NaN	NaN
NaN	NaN	-64.5638	8.53472						NaN	NaN	NaN	NaN
NaN	NaN	-64.571	8.55752						NaN	NaN	NaN	NaN
NaN	NaN	-64.571	8.55752						NaN	NaN	NaN	NaN
NaN	NaN	-64.571	8.55752						NaN	NaN	NaN	NaN
NaN	NaN	-64.5772	8.56067						NaN	NaN	NaN	NaN
NaN	NaN	-64.5739	8.53372						NaN	NaN	NaN	NaN
NaN	NaN	-64.5801	8.53689						NaN	NaN	NaN	NaN
NaN	NaN	-64.5801	8.53689						NaN	NaN	NaN	NaN
NaN	NaN	-64.5801	8.53689						NaN	NaN	NaN	NaN
NaN	NaN	-64.5801	8.53689						NaN	NaN	NaN	NaN
NaN	NaN	-64.5739	8.53372						NaN	NaN	NaN	NaN
NaN	NaN	-64.5739	8.53372						NaN	NaN	NaN	NaN
NaN	NaN	-64.3423	8.55164						NaN	NaN	NaN	NaN
NaN	NaN	-64.3423	8.55164						NaN	NaN	NaN	NaN
NaN	NaN	-64.3423	8.55164						NaN	NaN	NaN	NaN
NaN	NaN	-64.3423	8.55164						NaN	NaN	NaN	NaN
NaN	NaN	-64.3582	8.53412						NaN	NaN	NaN	NaN
NaN	NaN	-64.3582	8.53412						NaN	NaN	NaN	NaN
NaN	NaN	-64.3582	8.53412						NaN	NaN	NaN	NaN
NaN	NaN	-64.3582	8.53412						NaN	NaN	NaN	NaN
NaN	NaN	-64.3552	8.55796						NaN	NaN	NaN	NaN
NaN	NaN	-64.3393	8.57551						NaN	NaN	NaN	NaN
NaN	NaN	-64.3454	8.52777						NaN	NaN	NaN	NaN
NaN	NaN	-64.3364	8.5994						NaN	NaN	NaN	NaN
NaN	NaN	-64.3552	8.55796						NaN	NaN	NaN	NaN
NaN	NaN	-64.3582	8.53412						NaN	NaN	NaN	NaN
NaN	NaN	-64.2181	8.58736						NaN	NaN	NaN	NaN
NaN	NaN	-64.2181	8.58736						NaN	NaN	NaN	NaN
NaN	NaN	-64.2181	8.58736						NaN	NaN	NaN	NaN
NaN	NaN	-64.2181	8.58736						NaN	NaN	NaN	NaN
NaN	NaN	-64.2181	8.58736						NaN	NaN	NaN	NaN
NaN	NaN	-64.2181	8.58736						NaN	NaN	NaN	NaN
NaN	NaN	-64.2181	8.58736						NaN	NaN	NaN	NaN
NaN	NaN	-64.2084	8.60812						NaN	NaN	NaN	NaN
NaN	NaN	-64.2084	8.60812						NaN	NaN	NaN	NaN
NaN	NaN	-64.2084	8.60812						NaN	NaN	NaN	NaN
NaN	NaN	-64.1956	8.65284						NaN	NaN	NaN	NaN
NaN	NaN	-64.1926	8.67677						NaN	NaN	NaN	NaN
NaN	NaN	-64.186	8.6737						NaN	NaN	NaN	NaN
NaN	NaN	-64.186	8.6737						NaN	NaN	NaN	NaN
NaN	NaN	-64.2022	8.65593						NaN	NaN	NaN	NaN
NaN	NaN	-64.2087	8.65901						NaN	NaN	NaN	NaN
NaN	NaN	NaN	NaN						NaN	NaN	NaN	NaN
NaN	NaN	-64.4996	8.5445						NaN	NaN	NaN	NaN
NaN	NaN	-64.4907	8.61588						NaN	NaN	NaN	NaN
NaN	NaN	-64.4936	8.59208						NaN	NaN	NaN	NaN
NaN	NaN	-64.4936	8.59208						NaN	NaN	NaN	NaN
NaN	NaN	-64.4936	8.59208						NaN	NaN	NaN	NaN
NaN	NaN	-64.4936	8.59208						NaN	NaN	NaN	NaN
NaN	NaN	-64.4936	8.59208						NaN	NaN	NaN	NaN
NaN	NaN	-64.4996	8.5445						NaN	NaN	NaN	NaN
NaN	NaN	-64.3566	8.47061						NaN	NaN	NaN	NaN
NaN	NaN	-64.3566	8.47061						NaN	NaN	NaN	NaN
NaN	NaN	-64.3566	8.47061						NaN	NaN	NaN	NaN
NaN	NaN	-64.3566	8.47061						NaN	NaN	NaN	NaN
NaN	NaN	-64.3537	8.49446						NaN	NaN	NaN	NaN
NaN	NaN	-64.3537	8.49446						NaN	NaN	NaN	NaN
NaN	NaN	-64.3444	8.51511						NaN	NaN	NaN	NaN
NaN	NaN	-64.3444	8.51511						NaN	NaN	NaN	NaN
NaN	NaN	-64.3444	8.51511						NaN	NaN	NaN	NaN
NaN	NaN	-64.3444	8.51511						NaN	NaN	NaN	NaN
NaN	NaN	-64.3444	8.51511						NaN	NaN	NaN	NaN
NaN	NaN	-64.2097	8.52051						NaN	NaN	NaN	NaN
NaN	NaN	-64.2097	8.52051						NaN	NaN	NaN	NaN
NaN	NaN	-64.2097	8.52051						NaN	NaN	NaN	NaN
NaN	NaN	-64.6328	8.48839						NaN	NaN	NaN	NaN
NaN	NaN	-64.6328	8.48839						NaN	NaN	NaN	NaN
NaN	NaN	-64.6361	8.51533						NaN	NaN	NaN	NaN
NaN	NaN	-64.6361	8.51533						NaN	NaN	NaN	NaN
NaN	NaN	-64.6389	8.49159						NaN	NaN	NaN	NaN
NaN	NaN	-64.6328	8.48839						NaN	NaN	NaN	NaN
NaN	NaN	-64.2116	8.58423						NaN	NaN	NaN	NaN
NaN	NaN	-64.3518	8.53095						NaN	NaN	NaN	NaN
NaN	NaN	-64.3518	8.53095						NaN	NaN	NaN	NaN
NaN	NaN	-64.3582	8.53412						NaN	NaN	NaN	NaN
NaN	NaN	-64.3582	8.53412						NaN	NaN	NaN	NaN
NaN	NaN	-64.371	8.54046						NaN	NaN	NaN	NaN
NaN	NaN	-64.3807	8.57054						NaN	NaN	NaN	NaN
NaN	NaN	-64.3807	8.57054						NaN	NaN	NaN	NaN
NaN	NaN	-64.3807	8.57054						NaN	NaN	NaN	NaN
NaN	NaN	-64.3807	8.57054						NaN	NaN	NaN	NaN
NaN	NaN	-64.3807	8.57054						NaN	NaN	NaN	NaN
NaN	NaN	-64.3807	8.57054						NaN	NaN	NaN	NaN
NaN	NaN	-64.3807	8.57054						NaN	NaN	NaN	NaN
NaN	NaN	-64.3807	8.57054						NaN	NaN	NaN	NaN
NaN	NaN	-64.3557	8.60877						NaN	NaN	NaN	NaN
NaN	NaN	-64.3518	8.53095						NaN	NaN	NaN	NaN
NaN	NaN	-64.3518	8.53095						NaN	NaN	NaN	NaN
NaN	NaN	-64.2164	8.71172						NaN	NaN	NaN	NaN
NaN	NaN	-64.4905	8.4145						NaN	NaN	NaN	NaN
NaN	NaN	-64.4951	8.6048						NaN	NaN	NaN	NaN
NaN	NaN	-64.3518	8.53095						NaN	NaN	NaN	NaN
NaN	NaN	-64.3518	8.53095						NaN	NaN	NaN	NaN
NaN	NaN	-64.3518	8.53095						NaN	NaN	NaN	NaN
NaN	NaN	-64.3518	8.53095						NaN	NaN	NaN	NaN
NaN	NaN	-64.3518	8.53095						NaN	NaN	NaN	NaN
NaN	NaN	-64.3518	8.53095						NaN	NaN	NaN	NaN
NaN	NaN	-64.3518	8.53095						NaN	NaN	NaN	NaN
NaN	NaN	-64.3518	8.53095						NaN	NaN	NaN	NaN
NaN	NaN	-64.3518	8.53095						NaN	NaN	NaN	NaN
NaN	NaN	-64.3518	8.53095						NaN	NaN	NaN	NaN
NaN	NaN	-64.3518	8.53095						NaN	NaN	NaN	NaN
NaN	NaN	-64.3518	8.53095						NaN	NaN	NaN	NaN
NaN	NaN	-64.3518	8.53095						NaN	NaN	NaN	NaN
NaN	NaN	-64.3518	8.53095						NaN	NaN	NaN	NaN
NaN	NaN	-64.3518	8.53095						NaN	NaN	NaN	NaN
NaN	NaN	-64.3518	8.53095						NaN	NaN	NaN	NaN
NaN	NaN	-64.3518	8.53095						NaN	NaN	NaN	NaN
NaN	NaN	-64.3518	8.53095						NaN	NaN	NaN	NaN
NaN	NaN	-64.3518	8.53095						NaN	NaN	NaN	NaN
NaN	NaN	-64.3518	8.53095						NaN	NaN	NaN	NaN
NaN	NaN	-64.3518	8.53095						NaN	NaN	NaN	NaN
NaN	NaN	-64.3518	8.53095						NaN	NaN	NaN	NaN
NaN	NaN	-64.3518	8.53095						NaN	NaN	NaN	NaN
NaN	NaN	-64.3518	8.53095						NaN	NaN	NaN	NaN
NaN	NaN	-64.3518	8.53095						NaN	NaN	NaN	NaN
NaN	NaN	-64.3518	8.53095						NaN	NaN	NaN	NaN
NaN	NaN	-64.3518	8.53095						NaN	NaN	NaN	NaN
NaN	NaN	-64.3518	8.53095						NaN	NaN	NaN	NaN
NaN	NaN	-64.3518	8.53095						NaN	NaN	NaN	NaN
NaN	NaN	-64.3325	8.5214						NaN	NaN	NaN	NaN
NaN	NaN	-64.3325	8.5214						NaN	NaN	NaN	NaN
NaN	NaN	-64.3454	8.52777						NaN	NaN	NaN	NaN
NaN	NaN	-64.3454	8.52777						NaN	NaN	NaN	NaN
NaN	NaN	-64.3454	8.52777						NaN	NaN	NaN	NaN
NaN	NaN	-64.3454	8.52777						NaN	NaN	NaN	NaN
NaN	NaN	-64.487	8.53818						NaN	NaN	NaN	NaN
NaN	NaN	-64.487	8.53818						NaN	NaN	NaN	NaN
NaN	NaN	-64.487	8.53818						NaN	NaN	NaN	NaN
NaN	NaN	NaN	NaN						NaN	NaN	NaN	NaN
NaN	NaN	-64.487	8.53818						NaN	NaN	NaN	NaN
NaN	NaN	-64.487	8.53818						NaN	NaN	NaN	NaN
NaN	NaN	-64.487	8.53818						NaN	NaN	NaN	NaN
NaN	NaN	-64.487	8.53818						NaN	NaN	NaN	NaN
NaN	NaN	-64.487	8.53818						NaN	NaN	NaN	NaN
NaN	NaN	-64.487	8.53818						NaN	NaN	NaN	NaN
NaN	NaN	-64.487	8.53818						NaN	NaN	NaN	NaN
NaN	NaN	-64.487	8.53818						NaN	NaN	NaN	NaN
NaN	NaN	-64.487	8.53818						NaN	NaN	NaN	NaN
NaN	NaN	-64.487	8.53818						NaN	NaN	NaN	NaN
NaN	NaN	-64.487	8.53818						NaN	NaN	NaN	NaN
NaN	NaN	-64.487	8.53818						NaN	NaN	NaN	NaN
NaN	NaN	-64.487	8.53818						NaN	NaN	NaN	NaN
NaN	NaN	-64.487	8.53818						NaN	NaN	NaN	NaN
NaN	NaN	-64.487	8.53818						NaN	NaN	NaN	NaN
NaN	NaN	-64.487	8.53818						NaN	NaN	NaN	NaN
NaN	NaN	-64.487	8.53818						NaN	NaN	NaN	NaN
NaN	NaN	-64.487	8.53818						NaN	NaN	NaN	NaN
NaN	NaN	-64.487	8.53818						NaN	NaN	NaN	NaN
NaN	NaN	-64.487	8.53818						NaN	NaN	NaN	NaN
NaN	NaN	-64.487	8.53818						NaN	NaN	NaN	NaN
NaN	NaN	-64.487	8.53818						NaN	NaN	NaN	NaN
NaN	NaN	-64.487	8.53818						NaN	NaN	NaN	NaN
NaN	NaN	-64.487	8.53818						NaN	NaN	NaN	NaN
NaN	NaN	-63.1122	9.01726						NaN	NaN	NaN	NaN
NaN	NaN	-63.1455	9.37774						NaN	NaN	NaN	NaN
NaN	NaN	-63.4151	9.39406						NaN	NaN	NaN	NaN
NaN	NaN	-63.1455	9.37774						NaN	NaN	NaN	NaN
NaN	NaN	-63.4587	9.33195						NaN	NaN	NaN	NaN
NaN	NaN	-63.1705	9.33447						NaN	NaN	NaN	NaN
NaN	NaN	-64.3611	8.35944						NaN	NaN	NaN	NaN
NaN	NaN	-64.3611	8.35944						NaN	NaN	NaN	NaN
NaN	NaN	-64.3626	8.42295						NaN	NaN	NaN	NaN
NaN	NaN	-64.3438	8.46415						NaN	NaN	NaN	NaN
NaN	NaN	-64.3566	8.47061						NaN	NaN	NaN	NaN
NaN	NaN	-64.363	8.47383						NaN	NaN	NaN	NaN
NaN	NaN	-64.363	8.47383						NaN	NaN	NaN	NaN
NaN	NaN	-64.3502	8.46738						NaN	NaN	NaN	NaN
NaN	NaN	-64.4905	8.4145						NaN	NaN	NaN	NaN
NaN	NaN	-64.4905	8.4145						NaN	NaN	NaN	NaN
NaN	NaN	-64.4918	8.47791						NaN	NaN	NaN	NaN
NaN	NaN	-64.4918	8.47791						NaN	NaN	NaN	NaN
NaN	NaN	-64.4918	8.47791						NaN	NaN	NaN	NaN
NaN	NaN	-64.4918	8.47791						NaN	NaN	NaN	NaN
NaN	NaN	-64.4918	8.47791						NaN	NaN	NaN	NaN
NaN	NaN	-64.4918	8.47791						NaN	NaN	NaN	NaN
NaN	NaN	-64.4918	8.47791						NaN	NaN	NaN	NaN
NaN	NaN	-64.4981	8.48112						NaN	NaN	NaN	NaN
NaN	NaN	-64.4981	8.48112						NaN	NaN	NaN	NaN
NaN	NaN	-64.4918	8.47791						NaN	NaN	NaN	NaN
NaN	NaN	-64.4826	8.49852						NaN	NaN	NaN	NaN
NaN	NaN	-64.4826	8.49852						NaN	NaN	NaN	NaN
NaN	NaN	-64.4826	8.49852						NaN	NaN	NaN	NaN
NaN	NaN	-64.4826	8.49852						NaN	NaN	NaN	NaN
NaN	NaN	-64.4826	8.49852						NaN	NaN	NaN	NaN
NaN	NaN	-64.4826	8.49852						NaN	NaN	NaN	NaN
NaN	NaN	-64.4826	8.49852						NaN	NaN	NaN	NaN
NaN	NaN	-64.4826	8.49852						NaN	NaN	NaN	NaN
NaN	NaN	-64.4957	8.48734						NaN	NaN	NaN	NaN
NaN	NaN	-64.4957	8.48734						NaN	NaN	NaN	NaN
NaN	NaN	-64.4657	8.47203						NaN	NaN	NaN	NaN
NaN	NaN	-64.4957	8.48734						NaN	NaN	NaN	NaN
NaN	NaN	-64.4957	8.48734						NaN	NaN	NaN	NaN
NaN	NaN	-64.4957	8.48734						NaN	NaN	NaN	NaN
NaN	NaN	-64.4957	8.48734						NaN	NaN	NaN	NaN
NaN	NaN	-64.4957	8.48734						NaN	NaN	NaN	NaN
NaN	NaN	-64.4957	8.48734						NaN	NaN	NaN	NaN
NaN	NaN	-64.4957	8.48734						NaN	NaN	NaN	NaN
NaN	NaN	-64.4957	8.48734						NaN	NaN	NaN	NaN
NaN	NaN	-64.4657	8.47203						NaN	NaN	NaN	NaN
NaN	NaN	-64.5256	8.50255						NaN	NaN	NaN	NaN
NaN	NaN	-64.4957	8.48734						NaN	NaN	NaN	NaN
NaN	NaN	-64.4957	8.48734						NaN	NaN	NaN	NaN
NaN	NaN	-64.4957	8.48734						NaN	NaN	NaN	NaN
NaN	NaN	-64.4957	8.48734						NaN	NaN	NaN	NaN
NaN	NaN	-64.4957	8.48734						NaN	NaN	NaN	NaN
NaN	NaN	-64.51	8.37419						NaN	NaN	NaN	NaN
NaN	NaN	-64.4957	8.48734						NaN	NaN	NaN	NaN
NaN	NaN	-64.5126	8.61552						NaN	NaN	NaN	NaN
NaN	NaN	-64.4957	8.48734						NaN	NaN	NaN	NaN
NaN	NaN	-64.5256	8.50255						NaN	NaN	NaN	NaN
NaN	NaN	-64.5126	8.61552						NaN	NaN	NaN	NaN
NaN	NaN	-64.5397	8.38977						NaN	NaN	NaN	NaN
NaN	NaN	-64.4957	8.48734						NaN	NaN	NaN	NaN
NaN	NaN	-64.4957	8.48734						NaN	NaN	NaN	NaN
NaN	NaN	-64.4665	8.46501						NaN	NaN	NaN	NaN
NaN	NaN	-64.4665	8.46501						NaN	NaN	NaN	NaN
NaN	NaN	-64.4665	8.46501						NaN	NaN	NaN	NaN
NaN	NaN	-64.4758	8.44439						NaN	NaN	NaN	NaN
NaN	NaN	-64.4758	8.44439						NaN	NaN	NaN	NaN
NaN	NaN	-64.4758	8.44439						NaN	NaN	NaN	NaN
NaN	NaN	-64.4758	8.44439						NaN	NaN	NaN	NaN
NaN	NaN	-64.4758	8.44439						NaN	NaN	NaN	NaN
NaN	NaN	-64.4758	8.44439						NaN	NaN	NaN	NaN
NaN	NaN	-64.4758	8.44439						NaN	NaN	NaN	NaN
NaN	NaN	-64.4758	8.44439						NaN	NaN	NaN	NaN
NaN	NaN	-64.4699	8.4921						NaN	NaN	NaN	NaN
NaN	NaN	-64.4699	8.4921						NaN	NaN	NaN	NaN
NaN	NaN	-64.4728	8.46824						NaN	NaN	NaN	NaN
NaN	NaN	-64.6176	8.60573						NaN	NaN	NaN	NaN
NaN	NaN	-64.6176	8.60573						NaN	NaN	NaN	NaN
NaN	NaN	-64.6176	8.60573						NaN	NaN	NaN	NaN
NaN	NaN	-64.3444	8.51511						NaN	NaN	NaN	NaN
NaN	NaN	-64.3473	8.49124						NaN	NaN	NaN	NaN
NaN	NaN	-64.3473	8.49124						NaN	NaN	NaN	NaN
NaN	NaN	-64.4826	8.49852						NaN	NaN	NaN	NaN
NaN	NaN	-64.4826	8.49852						NaN	NaN	NaN	NaN
NaN	NaN	-64.4762	8.49531						NaN	NaN	NaN	NaN
NaN	NaN	-64.4791	8.47147						NaN	NaN	NaN	NaN
NaN	NaN	-64.4791	8.47147						NaN	NaN	NaN	NaN
NaN	NaN	-64.4791	8.47147						NaN	NaN	NaN	NaN
NaN	NaN	-64.4791	8.47147						NaN	NaN	NaN	NaN
NaN	NaN	-64.4791	8.47147						NaN	NaN	NaN	NaN
NaN	NaN	-64.4791	8.47147						NaN	NaN	NaN	NaN
NaN	NaN	-64.4791	8.47147						NaN	NaN	NaN	NaN
NaN	NaN	-64.4791	8.47147						NaN	NaN	NaN	NaN
NaN	NaN	-64.4791	8.47147						NaN	NaN	NaN	NaN
NaN	NaN	-64.4791	8.47147						NaN	NaN	NaN	NaN
NaN	NaN	-64.4791	8.47147						NaN	NaN	NaN	NaN
NaN	NaN	-64.4791	8.47147						NaN	NaN	NaN	NaN
NaN	NaN	-64.4791	8.47147						NaN	NaN	NaN	NaN
NaN	NaN	-64.4791	8.47147						NaN	NaN	NaN	NaN
NaN	NaN	-64.4791	8.47147						NaN	NaN	NaN	NaN
NaN	NaN	NaN	NaN						NaN	NaN	NaN	NaN
NaN	NaN	NaN	NaN						NaN	NaN	NaN	NaN
NaN	NaN	-64.4791	8.47147						NaN	NaN	NaN	NaN
NaN	NaN	-64.4791	8.47147						NaN	NaN	NaN	NaN
NaN	NaN	-64.4791	8.47147						NaN	NaN	NaN	NaN
NaN	NaN	-64.3373	8.46091						NaN	NaN	NaN	NaN
NaN	NaN	-64.3373	8.46091						NaN	NaN	NaN	NaN
NaN	NaN	-64.3373	8.46091						NaN	NaN	NaN	NaN
NaN	NaN	-64.3373	8.46091						NaN	NaN	NaN	NaN
NaN	NaN	-64.3373	8.46091						NaN	NaN	NaN	NaN
NaN	NaN	-64.3373	8.46091						NaN	NaN	NaN	NaN
NaN	NaN	-64.3373	8.46091						NaN	NaN	NaN	NaN
NaN	NaN	-64.3373	8.46091						NaN	NaN	NaN	NaN
NaN	NaN	-64.3373	8.46091						NaN	NaN	NaN	NaN
NaN	NaN	-64.3373	8.46091						NaN	NaN	NaN	NaN
NaN	NaN	-64.3236	8.46146						NaN	NaN	NaN	NaN
NaN	NaN	-64.3236	8.46146						NaN	NaN	NaN	NaN
NaN	NaN	-64.3236	8.46146						NaN	NaN	NaN	NaN
NaN	NaN	-64.3236	8.46146						NaN	NaN	NaN	NaN
NaN	NaN	-64.3236	8.46146						NaN	NaN	NaN	NaN
NaN	NaN	-64.3236	8.46146						NaN	NaN	NaN	NaN
NaN	NaN	-64.3236	8.46146						NaN	NaN	NaN	NaN
NaN	NaN	-64.3236	8.46146						NaN	NaN	NaN	NaN
NaN	NaN	-64.3236	8.46146						NaN	NaN	NaN	NaN
NaN	NaN	-64.3236	8.46146						NaN	NaN	NaN	NaN
NaN	NaN	-64.3236	8.46146						NaN	NaN	NaN	NaN
NaN	NaN	-64.3236	8.46146						NaN	NaN	NaN	NaN
NaN	NaN	-64.3236	8.46146						NaN	NaN	NaN	NaN
NaN	NaN	-64.3236	8.46146						NaN	NaN	NaN	NaN
NaN	NaN	-64.3236	8.46146						NaN	NaN	NaN	NaN
NaN	NaN	-64.3236	8.46146						NaN	NaN	NaN	NaN
NaN	NaN	-64.3236	8.46146						NaN	NaN	NaN	NaN
NaN	NaN	-64.3236	8.46146						NaN	NaN	NaN	NaN
NaN	NaN	-64.3236	8.46146						NaN	NaN	NaN	NaN
NaN	NaN	-64.3236	8.46146						NaN	NaN	NaN	NaN
NaN	NaN	-64.3236	8.46146						NaN	NaN	NaN	NaN
NaN	NaN	-64.3236	8.46146						NaN	NaN	NaN	NaN
NaN	NaN	-64.3236	8.46146						NaN	NaN	NaN	NaN
NaN	NaN	-64.3236	8.46146						NaN	NaN	NaN	NaN
NaN	NaN	-64.3236	8.46146						NaN	NaN	NaN	NaN
NaN	NaN	-64.3236	8.46146						NaN	NaN	NaN	NaN
NaN	NaN	-64.3236	8.46146						NaN	NaN	NaN	NaN
NaN	NaN	-64.1826	8.51475						NaN	NaN	NaN	NaN
NaN	NaN	-64.1826	8.51475						NaN	NaN	NaN	NaN
NaN	NaN	-64.6072	8.48256						NaN	NaN	NaN	NaN
NaN	NaN	-64.6072	8.48256						NaN	NaN	NaN	NaN
NaN	NaN	-64.6072	8.48256						NaN	NaN	NaN	NaN
NaN	NaN	-64.6072	8.48256						NaN	NaN	NaN	NaN
NaN	NaN	-64.6072	8.48256						NaN	NaN	NaN	NaN
NaN	NaN	-64.6072	8.48256						NaN	NaN	NaN	NaN
NaN	NaN	-64.6072	8.48256						NaN	NaN	NaN	NaN
NaN	NaN	-64.6072	8.48256						NaN	NaN	NaN	NaN
NaN	NaN	-64.6237	8.50897						NaN	NaN	NaN	NaN
NaN	NaN	-64.6237	8.50897						NaN	NaN	NaN	NaN
NaN	NaN	-64.6237	8.50897						NaN	NaN	NaN	NaN
NaN	NaN	-64.6237	8.50897						NaN	NaN	NaN	NaN
NaN	NaN	-64.6237	8.50897						NaN	NaN	NaN	NaN
NaN	NaN	-64.3409	8.48803						NaN	NaN	NaN	NaN
NaN	NaN	-64.3409	8.48803						NaN	NaN	NaN	NaN
NaN	NaN	-64.3409	8.48803						NaN	NaN	NaN	NaN
NaN	NaN	-64.3409	8.48803						NaN	NaN	NaN	NaN
NaN	NaN	-64.3409	8.48803						NaN	NaN	NaN	NaN
NaN	NaN	-64.3409	8.48803						NaN	NaN	NaN	NaN
NaN	NaN	-64.3409	8.48803						NaN	NaN	NaN	NaN
NaN	NaN	-64.3409	8.48803						NaN	NaN	NaN	NaN
NaN	NaN	-64.3409	8.48803						NaN	NaN	NaN	NaN
NaN	NaN	-64.3409	8.48803						NaN	NaN	NaN	NaN
NaN	NaN	-64.3409	8.48803						NaN	NaN	NaN	NaN
NaN	NaN	-64.5638	8.4194						NaN	NaN	NaN	NaN
NaN	NaN	-64.5638	8.4194						NaN	NaN	NaN	NaN
NaN	NaN	-64.7467	8.5146						NaN	NaN	NaN	NaN
NaN	NaN	-64.7467	8.5146						NaN	NaN	NaN	NaN
NaN	NaN	-64.7467	8.5146						NaN	NaN	NaN	NaN
NaN	NaN	-64.7467	8.5146						NaN	NaN	NaN	NaN
NaN	NaN	-64.7467	8.5146						NaN	NaN	NaN	NaN
NaN	NaN	-64.7467	8.5146						NaN	NaN	NaN	NaN
NaN	NaN	-64.7467	8.5146						NaN	NaN	NaN	NaN
NaN	NaN	-64.5651	8.50115						NaN	NaN	NaN	NaN
NaN	NaN	-64.5651	8.50115						NaN	NaN	NaN	NaN
NaN	NaN	-64.5651	8.50115						NaN	NaN	NaN	NaN
NaN	NaN	-64.5651	8.50115						NaN	NaN	NaN	NaN
NaN	NaN	-64.5651	8.50115						NaN	NaN	NaN	NaN
NaN	NaN	-64.5651	8.50115						NaN	NaN	NaN	NaN
NaN	NaN	-64.5651	8.50115						NaN	NaN	NaN	NaN
NaN	NaN	-64.5651	8.50115						NaN	NaN	NaN	NaN
NaN	NaN	-64.5651	8.50115						NaN	NaN	NaN	NaN
NaN	NaN	-64.5651	8.50115						NaN	NaN	NaN	NaN
NaN	NaN	-64.5651	8.50115						NaN	NaN	NaN	NaN
NaN	NaN	-64.5651	8.50115						NaN	NaN	NaN	NaN
NaN	NaN	-64.5651	8.50115						NaN	NaN	NaN	NaN
NaN	NaN	-64.5651	8.50115						NaN	NaN	NaN	NaN
NaN	NaN	-64.5651	8.50115						NaN	NaN	NaN	NaN
NaN	NaN	-64.5651	8.50115						NaN	NaN	NaN	NaN
NaN	NaN	-64.5651	8.50115						NaN	NaN	NaN	NaN
NaN	NaN	-64.5651	8.50115						NaN	NaN	NaN	NaN
NaN	NaN	-64.5651	8.50115						NaN	NaN	NaN	NaN
NaN	NaN	-64.6237	8.50897						NaN	NaN	NaN	NaN
NaN	NaN	-64.6237	8.50897						NaN	NaN	NaN	NaN
NaN	NaN	-64.6237	8.50897						NaN	NaN	NaN	NaN
NaN	NaN	-64.6237	8.50897						NaN	NaN	NaN	NaN
NaN	NaN	-64.6237	8.50897						NaN	NaN	NaN	NaN
NaN	NaN	-64.6237	8.50897						NaN	NaN	NaN	NaN
NaN	NaN	-64.6237	8.50897						NaN	NaN	NaN	NaN
NaN	NaN	-64.6237	8.50897						NaN	NaN	NaN	NaN
NaN	NaN	-64.6204	8.48198						NaN	NaN	NaN	NaN
NaN	NaN	-64.6204	8.48198						NaN	NaN	NaN	NaN
NaN	NaN	-64.6204	8.48198						NaN	NaN	NaN	NaN
NaN	NaN	-64.4791	8.47147						NaN	NaN	NaN	NaN
NaN	NaN	-64.4791	8.47147						NaN	NaN	NaN	NaN
NaN	NaN	-64.4791	8.47147						NaN	NaN	NaN	NaN
NaN	NaN	-64.4791	8.47147						NaN	NaN	NaN	NaN
NaN	NaN	-64.4791	8.47147						NaN	NaN	NaN	NaN
NaN	NaN	-64.4791	8.47147						NaN	NaN	NaN	NaN
NaN	NaN	-64.4791	8.47147						NaN	NaN	NaN	NaN
NaN	NaN	-64.4914	8.42706						NaN	NaN	NaN	NaN
NaN	NaN	-64.4855	8.47469						NaN	NaN	NaN	NaN
NaN	NaN	-64.6175	8.50578						NaN	NaN	NaN	NaN
NaN	NaN	-64.6175	8.50578						NaN	NaN	NaN	NaN
NaN	NaN	-64.3287	8.53262						NaN	NaN	NaN	NaN
NaN	NaN	-64.3329	8.57236						NaN	NaN	NaN	NaN
NaN	NaN	-64.7506	8.60011						NaN	NaN	NaN	NaN
NaN	NaN	-64.6085	8.5264						NaN	NaN	NaN	NaN
NaN	NaN	-64.6237	8.50897						NaN	NaN	NaN	NaN
NaN	NaN	-64.6237	8.50897						NaN	NaN	NaN	NaN
NaN	NaN	-64.6237	8.50897						NaN	NaN	NaN	NaN
NaN	NaN	-64.6237	8.50897						NaN	NaN	NaN	NaN
NaN	NaN	-64.6237	8.50897						NaN	NaN	NaN	NaN
NaN	NaN	-64.6237	8.50897						NaN	NaN	NaN	NaN
NaN	NaN	-64.6237	8.50897						NaN	NaN	NaN	NaN
NaN	NaN	-64.6175	8.50578						NaN	NaN	NaN	NaN
NaN	NaN	-64.6175	8.50578						NaN	NaN	NaN	NaN
NaN	NaN	-64.6175	8.50578						NaN	NaN	NaN	NaN
NaN	NaN	-64.6175	8.50578						NaN	NaN	NaN	NaN
NaN	NaN	-64.6175	8.50578						NaN	NaN	NaN	NaN
NaN	NaN	-64.6175	8.50578						NaN	NaN	NaN	NaN
NaN	NaN	-64.6175	8.50578						NaN	NaN	NaN	NaN
NaN	NaN	-64.6175	8.50578						NaN	NaN	NaN	NaN
NaN	NaN	-64.6175	8.50578						NaN	NaN	NaN	NaN
NaN	NaN	-64.6175	8.50578						NaN	NaN	NaN	NaN
NaN	NaN	-64.6175	8.50578						NaN	NaN	NaN	NaN
NaN	NaN	-64.6175	8.50578						NaN	NaN	NaN	NaN
NaN	NaN	-64.6175	8.50578						NaN	NaN	NaN	NaN
NaN	NaN	-64.6175	8.50578						NaN	NaN	NaN	NaN
NaN	NaN	-64.6175	8.50578						NaN	NaN	NaN	NaN
NaN	NaN	-64.6175	8.50578						NaN	NaN	NaN	NaN
NaN	NaN	-64.6175	8.50578						NaN	NaN	NaN	NaN
NaN	NaN	-64.6175	8.50578						NaN	NaN	NaN	NaN
NaN	NaN	-64.6175	8.50578						NaN	NaN	NaN	NaN
NaN	NaN	-64.6175	8.50578						NaN	NaN	NaN	NaN
NaN	NaN	-64.6175	8.50578						NaN	NaN	NaN	NaN
NaN	NaN	-64.6175	8.50578						NaN	NaN	NaN	NaN
NaN	NaN	-64.6175	8.50578						NaN	NaN	NaN	NaN
NaN	NaN	-64.6175	8.50578						NaN	NaN	NaN	NaN
NaN	NaN	-64.6175	8.50578						NaN	NaN	NaN	NaN
NaN	NaN	-64.6175	8.50578						NaN	NaN	NaN	NaN
NaN	NaN	-64.6175	8.50578						NaN	NaN	NaN	NaN
NaN	NaN	-64.6175	8.50578						NaN	NaN	NaN	NaN
NaN	NaN	-64.6333	8.53908						NaN	NaN	NaN	NaN
NaN	NaN	-64.6333	8.53908						NaN	NaN	NaN	NaN
NaN	NaN	-64.6333	8.53908						NaN	NaN	NaN	NaN
NaN	NaN	-64.6209	8.53275						NaN	NaN	NaN	NaN
NaN	NaN	-64.6209	8.53275						NaN	NaN	NaN	NaN
NaN	NaN	-64.6237	8.50897						NaN	NaN	NaN	NaN
NaN	NaN	-64.6237	8.50897						NaN	NaN	NaN	NaN
NaN	NaN	-64.6237	8.50897						NaN	NaN	NaN	NaN
NaN	NaN	-64.6237	8.50897						NaN	NaN	NaN	NaN
NaN	NaN	-64.6237	8.50897						NaN	NaN	NaN	NaN
NaN	NaN	-64.6237	8.50897						NaN	NaN	NaN	NaN
NaN	NaN	-64.6299	8.51215						NaN	NaN	NaN	NaN
NaN	NaN	-64.6357	8.46464						NaN	NaN	NaN	NaN
NaN	NaN	-64.6295	8.46142						NaN	NaN	NaN	NaN
NaN	NaN	-64.6295	8.46142						NaN	NaN	NaN	NaN
NaN	NaN	-64.6113	8.50258						NaN	NaN	NaN	NaN
NaN	NaN	-64.6237	8.50897						NaN	NaN	NaN	NaN
NaN	NaN	-64.6299	8.51215						NaN	NaN	NaN	NaN
NaN	NaN	-64.6147	8.52958						NaN	NaN	NaN	NaN
NaN	NaN	-64.6237	8.50897						NaN	NaN	NaN	NaN
NaN	NaN	-64.6299	8.51215						NaN	NaN	NaN	NaN
NaN	NaN	-64.6299	8.51215						NaN	NaN	NaN	NaN
NaN	NaN	-64.6299	8.51215						NaN	NaN	NaN	NaN
NaN	NaN	-64.6299	8.51215						NaN	NaN	NaN	NaN
NaN	NaN	-64.6299	8.51215						NaN	NaN	NaN	NaN
NaN	NaN	-64.6299	8.51215						NaN	NaN	NaN	NaN
NaN	NaN	-64.6299	8.51215						NaN	NaN	NaN	NaN
NaN	NaN	-64.6299	8.51215						NaN	NaN	NaN	NaN
NaN	NaN	-64.6175	8.50578						NaN	NaN	NaN	NaN
NaN	NaN	-64.6175	8.50578						NaN	NaN	NaN	NaN
NaN	NaN	-64.6175	8.50578						NaN	NaN	NaN	NaN
NaN	NaN	-64.6175	8.50578						NaN	NaN	NaN	NaN
NaN	NaN	-64.6175	8.50578						NaN	NaN	NaN	NaN
NaN	NaN	-64.6175	8.50578						NaN	NaN	NaN	NaN
NaN	NaN	-64.6233	8.45819						NaN	NaN	NaN	NaN
NaN	NaN	-64.6295	8.46142						NaN	NaN	NaN	NaN
NaN	NaN	-64.6295	8.46142						NaN	NaN	NaN	NaN
NaN	NaN	-64.6295	8.46142						NaN	NaN	NaN	NaN
NaN	NaN	-64.6295	8.46142						NaN	NaN	NaN	NaN
NaN	NaN	-64.6295	8.46142						NaN	NaN	NaN	NaN
NaN	NaN	-64.6295	8.46142						NaN	NaN	NaN	NaN
NaN	NaN	-64.6295	8.46142						NaN	NaN	NaN	NaN
NaN	NaN	-64.6266	8.48519						NaN	NaN	NaN	NaN
NaN	NaN	-64.6113	8.50258						NaN	NaN	NaN	NaN
NaN	NaN	-64.6113	8.50258						NaN	NaN	NaN	NaN
NaN	NaN	-64.6113	8.50258						NaN	NaN	NaN	NaN
NaN	NaN	-64.6113	8.50258						NaN	NaN	NaN	NaN
NaN	NaN	-64.6113	8.50258						NaN	NaN	NaN	NaN
NaN	NaN	-64.6113	8.50258						NaN	NaN	NaN	NaN
NaN	NaN	-64.6113	8.50258						NaN	NaN	NaN	NaN
NaN	NaN	-64.6113	8.50258						NaN	NaN	NaN	NaN
NaN	NaN	-64.6113	8.50258						NaN	NaN	NaN	NaN
NaN	NaN	-64.6113	8.50258						NaN	NaN	NaN	NaN
NaN	NaN	-64.6113	8.50258						NaN	NaN	NaN	NaN
NaN	NaN	-64.6113	8.50258						NaN	NaN	NaN	NaN
NaN	NaN	-64.6204	8.48198						NaN	NaN	NaN	NaN
NaN	NaN	-64.6204	8.48198						NaN	NaN	NaN	NaN
NaN	NaN	-64.6113	8.50258						NaN	NaN	NaN	NaN
NaN	NaN	-64.4688	8.42854						NaN	NaN	NaN	NaN
NaN	NaN	-64.4761	8.48277						NaN	NaN	NaN	NaN
NaN	NaN	-64.4851	8.46215						NaN	NaN	NaN	NaN
NaN	NaN	-64.4851	8.46215						NaN	NaN	NaN	NaN
NaN	NaN	-64.4851	8.46215						NaN	NaN	NaN	NaN
NaN	NaN	-64.4851	8.46215						NaN	NaN	NaN	NaN
NaN	NaN	-64.4724	8.45567						NaN	NaN	NaN	NaN
NaN	NaN	-64.4724	8.45567						NaN	NaN	NaN	NaN
NaN	NaN	-64.4889	8.50172						NaN	NaN	NaN	NaN
NaN	NaN	-64.4889	8.50172						NaN	NaN	NaN	NaN
NaN	NaN	-64.4889	8.50172						NaN	NaN	NaN	NaN
NaN	NaN	-64.4889	8.50172						NaN	NaN	NaN	NaN
NaN	NaN	-64.4889	8.50172						NaN	NaN	NaN	NaN
NaN	NaN	-64.4889	8.50172						NaN	NaN	NaN	NaN
NaN	NaN	-64.4889	8.50172						NaN	NaN	NaN	NaN
NaN	NaN	-64.4889	8.50172						NaN	NaN	NaN	NaN
NaN	NaN	-64.4889	8.50172						NaN	NaN	NaN	NaN
NaN	NaN	-64.4889	8.50172						NaN	NaN	NaN	NaN
NaN	NaN	-64.4889	8.50172						NaN	NaN	NaN	NaN
NaN	NaN	-64.4889	8.50172						NaN	NaN	NaN	NaN
NaN	NaN	-64.4889	8.50172						NaN	NaN	NaN	NaN
NaN	NaN	-64.6299	8.51215						NaN	NaN	NaN	NaN
NaN	NaN	-64.6299	8.51215						NaN	NaN	NaN	NaN
NaN	NaN	-64.6299	8.51215						NaN	NaN	NaN	NaN
NaN	NaN	-64.6299	8.51215						NaN	NaN	NaN	NaN
NaN	NaN	-64.6299	8.51215						NaN	NaN	NaN	NaN
NaN	NaN	-64.6299	8.51215						NaN	NaN	NaN	NaN
NaN	NaN	-64.6299	8.51215						NaN	NaN	NaN	NaN
NaN	NaN	-64.6299	8.51215						NaN	NaN	NaN	NaN
NaN	NaN	-64.6299	8.51215						NaN	NaN	NaN	NaN
NaN	NaN	-64.6299	8.51215						NaN	NaN	NaN	NaN
NaN	NaN	-64.6299	8.51215						NaN	NaN	NaN	NaN
NaN	NaN	-64.6299	8.51215						NaN	NaN	NaN	NaN
NaN	NaN	-64.6299	8.51215						NaN	NaN	NaN	NaN
NaN	NaN	-64.6299	8.51215						NaN	NaN	NaN	NaN
NaN	NaN	-64.6204	8.48198						NaN	NaN	NaN	NaN
NaN	NaN	-64.6164	8.4424						NaN	NaN	NaN	NaN
NaN	NaN	-64.7582	8.5162						NaN	NaN	NaN	NaN
NaN	NaN	-64.7582	8.5162						NaN	NaN	NaN	NaN
NaN	NaN	-64.764	8.46871						NaN	NaN	NaN	NaN
NaN	NaN	-64.7671	8.49564						NaN	NaN	NaN	NaN
NaN	NaN	-64.6266	8.48519						NaN	NaN	NaN	NaN
NaN	NaN	-64.6266	8.48519						NaN	NaN	NaN	NaN
NaN	NaN	-64.6266	8.48519						NaN	NaN	NaN	NaN
NaN	NaN	-64.6237	8.50897						NaN	NaN	NaN	NaN
NaN	NaN	-64.6237	8.50897						NaN	NaN	NaN	NaN
NaN	NaN	-64.6237	8.50897						NaN	NaN	NaN	NaN
NaN	NaN	-64.6237	8.50897						NaN	NaN	NaN	NaN
NaN	NaN	-64.6237	8.50897						NaN	NaN	NaN	NaN
NaN	NaN	-64.6237	8.50897						NaN	NaN	NaN	NaN
NaN	NaN	-64.6237	8.50897						NaN	NaN	NaN	NaN
NaN	NaN	-64.6237	8.50897						NaN	NaN	NaN	NaN
NaN	NaN	-64.6237	8.50897						NaN	NaN	NaN	NaN
NaN	NaN	-64.6237	8.50897						NaN	NaN	NaN	NaN
NaN	NaN	-64.6237	8.50897						NaN	NaN	NaN	NaN
NaN	NaN	-64.6057	8.55023						NaN	NaN	NaN	NaN
NaN	NaN	-64.6057	8.55023						NaN	NaN	NaN	NaN
NaN	NaN	-64.6057	8.55023						NaN	NaN	NaN	NaN
NaN	NaN	-64.6057	8.55023						NaN	NaN	NaN	NaN
NaN	NaN	-64.6142	8.47877						NaN	NaN	NaN	NaN
NaN	NaN	-64.6142	8.47877						NaN	NaN	NaN	NaN
NaN	NaN	-64.6142	8.47877						NaN	NaN	NaN	NaN
NaN	NaN	-64.6142	8.47877						NaN	NaN	NaN	NaN
NaN	NaN	-64.6299	8.51215						NaN	NaN	NaN	NaN
NaN	NaN	-64.6299	8.51215						NaN	NaN	NaN	NaN
NaN	NaN	-64.6299	8.51215						NaN	NaN	NaN	NaN
NaN	NaN	-64.6299	8.51215						NaN	NaN	NaN	NaN
NaN	NaN	-64.6299	8.51215						NaN	NaN	NaN	NaN
NaN	NaN	-64.6299	8.51215						NaN	NaN	NaN	NaN
NaN	NaN	-64.6299	8.51215						NaN	NaN	NaN	NaN
NaN	NaN	-64.6299	8.51215						NaN	NaN	NaN	NaN
NaN	NaN	-64.6299	8.51215						NaN	NaN	NaN	NaN
NaN	NaN	-64.6299	8.51215						NaN	NaN	NaN	NaN
NaN	NaN	-64.6299	8.51215						NaN	NaN	NaN	NaN
NaN	NaN	-64.6299	8.51215						NaN	NaN	NaN	NaN
NaN	NaN	-64.6299	8.51215						NaN	NaN	NaN	NaN
NaN	NaN	-64.6237	8.50897						NaN	NaN	NaN	NaN
NaN	NaN	-64.6237	8.50897						NaN	NaN	NaN	NaN
NaN	NaN	-64.6237	8.50897						NaN	NaN	NaN	NaN
NaN	NaN	-64.6237	8.50897						NaN	NaN	NaN	NaN
NaN	NaN	-64.6237	8.50897						NaN	NaN	NaN	NaN
NaN	NaN	-64.6237	8.50897						NaN	NaN	NaN	NaN
NaN	NaN	-64.6237	8.50897						NaN	NaN	NaN	NaN
NaN	NaN	-64.6237	8.50897						NaN	NaN	NaN	NaN
NaN	NaN	-64.6237	8.50897						NaN	NaN	NaN	NaN
NaN	NaN	-64.6237	8.50897						NaN	NaN	NaN	NaN
NaN	NaN	-64.6237	8.50897						NaN	NaN	NaN	NaN
NaN	NaN	-64.6237	8.50897						NaN	NaN	NaN	NaN
NaN	NaN	-64.6237	8.50897						NaN	NaN	NaN	NaN
NaN	NaN	-64.6237	8.50897						NaN	NaN	NaN	NaN
NaN	NaN	-64.6237	8.50897						NaN	NaN	NaN	NaN
NaN	NaN	-64.6237	8.50897						NaN	NaN	NaN	NaN
NaN	NaN	-64.6237	8.50897						NaN	NaN	NaN	NaN
NaN	NaN	-64.6237	8.50897						NaN	NaN	NaN	NaN
NaN	NaN	-64.6237	8.50897						NaN	NaN	NaN	NaN
NaN	NaN	-64.6237	8.50897						NaN	NaN	NaN	NaN
NaN	NaN	-64.6237	8.50897						NaN	NaN	NaN	NaN
NaN	NaN	-64.6237	8.50897						NaN	NaN	NaN	NaN
NaN	NaN	-64.6237	8.50897						NaN	NaN	NaN	NaN
NaN	NaN	-64.6237	8.50897						NaN	NaN	NaN	NaN
NaN	NaN	-64.6237	8.50897						NaN	NaN	NaN	NaN
NaN	NaN	-64.6299	8.51215						NaN	NaN	NaN	NaN
NaN	NaN	-64.6328	8.48839						NaN	NaN	NaN	NaN
NaN	NaN	-64.6389	8.49159						NaN	NaN	NaN	NaN
NaN	NaN	-64.6389	8.49159						NaN	NaN	NaN	NaN
NaN	NaN	-64.6389	8.49159						NaN	NaN	NaN	NaN
NaN	NaN	-64.6389	8.49159						NaN	NaN	NaN	NaN
NaN	NaN	-64.6389	8.49159						NaN	NaN	NaN	NaN
NaN	NaN	-64.6389	8.49159						NaN	NaN	NaN	NaN
NaN	NaN	-64.6328	8.48839						NaN	NaN	NaN	NaN
NaN	NaN	-64.6175	8.50578						NaN	NaN	NaN	NaN
NaN	NaN	-64.6299	8.51215						NaN	NaN	NaN	NaN
NaN	NaN	-64.6389	8.49159						NaN	NaN	NaN	NaN
NaN	NaN	-64.6389	8.49159						NaN	NaN	NaN	NaN
NaN	NaN	-64.6389	8.49159						NaN	NaN	NaN	NaN
NaN	NaN	-64.6389	8.49159						NaN	NaN	NaN	NaN
NaN	NaN	-64.6389	8.49159						NaN	NaN	NaN	NaN
NaN	NaN	-64.6389	8.49159						NaN	NaN	NaN	NaN
NaN	NaN	-64.6389	8.49159						NaN	NaN	NaN	NaN
NaN	NaN	-64.6389	8.49159						NaN	NaN	NaN	NaN
NaN	NaN	-64.6389	8.49159						NaN	NaN	NaN	NaN
NaN	NaN	-64.6389	8.49159						NaN	NaN	NaN	NaN
NaN	NaN	-64.6389	8.49159						NaN	NaN	NaN	NaN
NaN	NaN	-64.6389	8.49159						NaN	NaN	NaN	NaN
NaN	NaN	-64.6389	8.49159						NaN	NaN	NaN	NaN
NaN	NaN	-64.6389	8.49159						NaN	NaN	NaN	NaN
NaN	NaN	-64.6389	8.49159						NaN	NaN	NaN	NaN
NaN	NaN	-64.6389	8.49159						NaN	NaN	NaN	NaN
NaN	NaN	-64.6389	8.49159						NaN	NaN	NaN	NaN
NaN	NaN	-64.6389	8.49159						NaN	NaN	NaN	NaN
NaN	NaN	-64.6389	8.49159						NaN	NaN	NaN	NaN
NaN	NaN	-64.6389	8.49159						NaN	NaN	NaN	NaN
NaN	NaN	-64.6389	8.49159						NaN	NaN	NaN	NaN
NaN	NaN	-64.6389	8.49159						NaN	NaN	NaN	NaN
NaN	NaN	-64.6389	8.49159						NaN	NaN	NaN	NaN
NaN	NaN	-64.6389	8.49159						NaN	NaN	NaN	NaN
NaN	NaN	-64.6237	8.50897						NaN	NaN	NaN	NaN
NaN	NaN	-64.6237	8.50897						NaN	NaN	NaN	NaN
NaN	NaN	-64.6237	8.50897						NaN	NaN	NaN	NaN
NaN	NaN	-64.6237	8.50897						NaN	NaN	NaN	NaN
NaN	NaN	-64.6237	8.50897						NaN	NaN	NaN	NaN
NaN	NaN	-64.6237	8.50897						NaN	NaN	NaN	NaN
NaN	NaN	-64.6237	8.50897						NaN	NaN	NaN	NaN
NaN	NaN	-64.6237	8.50897						NaN	NaN	NaN	NaN
NaN	NaN	-64.6237	8.50897						NaN	NaN	NaN	NaN
NaN	NaN	-64.6237	8.50897						NaN	NaN	NaN	NaN
NaN	NaN	-64.6237	8.50897						NaN	NaN	NaN	NaN
NaN	NaN	-64.6237	8.50897						NaN	NaN	NaN	NaN
NaN	NaN	-64.6237	8.50897						NaN	NaN	NaN	NaN
NaN	NaN	-64.6237	8.50897						NaN	NaN	NaN	NaN
NaN	NaN	-64.6237	8.50897						NaN	NaN	NaN	NaN
NaN	NaN	-64.6237	8.50897						NaN	NaN	NaN	NaN
NaN	NaN	-64.6237	8.50897						NaN	NaN	NaN	NaN
NaN	NaN	-64.6237	8.50897						NaN	NaN	NaN	NaN
NaN	NaN	-64.6237	8.50897						NaN	NaN	NaN	NaN
NaN	NaN	-64.6237	8.50897						NaN	NaN	NaN	NaN
NaN	NaN	-64.6237	8.50897						NaN	NaN	NaN	NaN
NaN	NaN	-64.6237	8.50897						NaN	NaN	NaN	NaN
NaN	NaN	-64.6237	8.50897						NaN	NaN	NaN	NaN
NaN	NaN	-64.6237	8.50897						NaN	NaN	NaN	NaN
NaN	NaN	-64.6237	8.50897						NaN	NaN	NaN	NaN
NaN	NaN	-64.6237	8.50897						NaN	NaN	NaN	NaN
NaN	NaN	-64.6237	8.50897						NaN	NaN	NaN	NaN
NaN	NaN	-64.6237	8.50897						NaN	NaN	NaN	NaN
NaN	NaN	-64.6237	8.50897						NaN	NaN	NaN	NaN
NaN	NaN	-64.6237	8.50897						NaN	NaN	NaN	NaN
NaN	NaN	-64.6237	8.50897						NaN	NaN	NaN	NaN
NaN	NaN	-64.6237	8.50897						NaN	NaN	NaN	NaN
NaN	NaN	-64.6237	8.50897						NaN	NaN	NaN	NaN
NaN	NaN	-64.6237	8.50897						NaN	NaN	NaN	NaN
NaN	NaN	-64.6328	8.48839						NaN	NaN	NaN	NaN
NaN	NaN	-64.6328	8.48839						NaN	NaN	NaN	NaN
NaN	NaN	-64.6328	8.48839						NaN	NaN	NaN	NaN
NaN	NaN	-64.6328	8.48839						NaN	NaN	NaN	NaN
NaN	NaN	-64.6328	8.48839						NaN	NaN	NaN	NaN
NaN	NaN	-64.6328	8.48839						NaN	NaN	NaN	NaN
NaN	NaN	-64.6328	8.48839						NaN	NaN	NaN	NaN
NaN	NaN	-64.6328	8.48839						NaN	NaN	NaN	NaN
NaN	NaN	-64.6328	8.48839						NaN	NaN	NaN	NaN
NaN	NaN	-64.6328	8.48839						NaN	NaN	NaN	NaN
NaN	NaN	-64.6328	8.48839						NaN	NaN	NaN	NaN
NaN	NaN	-64.6328	8.48839						NaN	NaN	NaN	NaN
NaN	NaN	-64.6328	8.48839						NaN	NaN	NaN	NaN
NaN	NaN	-64.6328	8.48839						NaN	NaN	NaN	NaN
NaN	NaN	-64.6328	8.48839						NaN	NaN	NaN	NaN
NaN	NaN	-64.6328	8.48839						NaN	NaN	NaN	NaN
NaN	NaN	-64.6328	8.48839						NaN	NaN	NaN	NaN
NaN	NaN	-64.6328	8.48839						NaN	NaN	NaN	NaN
NaN	NaN	-64.6328	8.48839						NaN	NaN	NaN	NaN
NaN	NaN	-64.6328	8.48839						NaN	NaN	NaN	NaN
NaN	NaN	-64.6328	8.48839						NaN	NaN	NaN	NaN
NaN	NaN	-64.6328	8.48839						NaN	NaN	NaN	NaN
NaN	NaN	-64.6328	8.48839						NaN	NaN	NaN	NaN
NaN	NaN	-64.9415	8.55712						NaN	NaN	NaN	NaN
NaN	NaN	-64.9393	8.44052						NaN	NaN	NaN	NaN
NaN	NaN	-64.4251	8.63635						NaN	NaN	NaN	NaN
NaN	NaN	-64.9449	8.67379						NaN	NaN	NaN	NaN
NaN	NaN	-64.9415	8.55712						NaN	NaN	NaN	NaN
NaN	NaN	-64.4251	8.63635						NaN	NaN	NaN	NaN
NaN	NaN	-64.9449	8.67379						NaN	NaN	NaN	NaN
NaN	NaN	-64.9415	8.55712						NaN	NaN	NaN	NaN
NaN	NaN	-64.6825	8.53803						NaN	NaN	NaN	NaN
NaN	NaN	-64.9415	8.55712						NaN	NaN	NaN	NaN
NaN	NaN	-65.2019	8.69231						NaN	NaN	NaN	NaN
NaN	NaN	-64.9449	8.67379						NaN	NaN	NaN	NaN
NaN	NaN	-64.686	8.65514						NaN	NaN	NaN	NaN
NaN	NaN	-64.6825	8.53803						NaN	NaN	NaN	NaN
NaN	NaN	-64.6825	8.53803						NaN	NaN	NaN	NaN
NaN	NaN	-64.9449	8.67379						NaN	NaN	NaN	NaN
NaN	NaN	-64.9415	8.55712						NaN	NaN	NaN	NaN
NaN	NaN	-64.9415	8.55712						NaN	NaN	NaN	NaN
NaN	NaN	-64.6825	8.53803						NaN	NaN	NaN	NaN
NaN	NaN	-64.9415	8.55712						NaN	NaN	NaN	NaN
NaN	NaN	-64.686	8.65514						NaN	NaN	NaN	NaN
NaN	NaN	-64.9415	8.55712						NaN	NaN	NaN	NaN
NaN	NaN	-64.686	8.65514						NaN	NaN	NaN	NaN
NaN	NaN	-64.6825	8.53803						NaN	NaN	NaN	NaN
NaN	NaN	-64.6825	8.53803						NaN	NaN	NaN	NaN
NaN	NaN	-64.6794	8.51112						NaN	NaN	NaN	NaN
NaN	NaN	-64.9359	8.69441						NaN	NaN	NaN	NaN
NaN	NaN	-64.9591	8.7566						NaN	NaN	NaN	NaN
NaN	NaN	-64.9566	8.64036						NaN	NaN	NaN	NaN
NaN	NaN	-64.9591	8.7566						NaN	NaN	NaN	NaN
NaN	NaN	-64.9533	8.75363						NaN	NaN	NaN	NaN
NaN	NaN	-64.6845	8.49869						NaN	NaN	NaN	NaN
NaN	NaN	-64.924	8.59822						NaN	NaN	NaN	NaN
NaN	NaN	-65.1817	8.61704						NaN	NaN	NaN	NaN
NaN	NaN	-64.6733	8.50795						NaN	NaN	NaN	NaN
NaN	NaN	-64.6855	8.5143						NaN	NaN	NaN	NaN
NaN	NaN	-64.6825	8.53803						NaN	NaN	NaN	NaN
NaN	NaN	-64.686	8.65514						NaN	NaN	NaN	NaN
NaN	NaN	-64.9449	8.67379						NaN	NaN	NaN	NaN
NaN	NaN	-64.9415	8.55712						NaN	NaN	NaN	NaN
NaN	NaN	-64.9298	8.55085						NaN	NaN	NaN	NaN
NaN	NaN	-64.6738	8.64902						NaN	NaN	NaN	NaN
NaN	NaN	-64.9298	8.55085						NaN	NaN	NaN	NaN
NaN	NaN	-64.9387	8.58076						NaN	NaN	NaN	NaN
NaN	NaN	-64.939	8.67076						NaN	NaN	NaN	NaN
NaN	NaN	-64.9357	8.55399						NaN	NaN	NaN	NaN
NaN	NaN	-64.6952	8.6345						NaN	NaN	NaN	NaN
NaN	NaN	-64.6952	8.6345						NaN	NaN	NaN	NaN
NaN	NaN	-64.9474	8.56024						NaN	NaN	NaN	NaN
NaN	NaN	-64.692	8.65819						NaN	NaN	NaN	NaN
NaN	NaN	-64.692	8.65819						NaN	NaN	NaN	NaN
NaN	NaN	-64.692	8.65819						NaN	NaN	NaN	NaN
NaN	NaN	-64.6886	8.54118						NaN	NaN	NaN	NaN
NaN	NaN	-64.692	8.65819						NaN	NaN	NaN	NaN
NaN	NaN	-64.9474	8.56024						NaN	NaN	NaN	NaN
NaN	NaN	-64.6886	8.54118						NaN	NaN	NaN	NaN
NaN	NaN	-64.9474	8.56024						NaN	NaN	NaN	NaN
NaN	NaN	-64.9474	8.56024						NaN	NaN	NaN	NaN
NaN	NaN	-64.9449	8.67379						NaN	NaN	NaN	NaN
NaN	NaN	-64.9415	8.55712						NaN	NaN	NaN	NaN
NaN	NaN	-64.6825	8.53803						NaN	NaN	NaN	NaN
NaN	NaN	-64.686	8.65514						NaN	NaN	NaN	NaN
NaN	NaN	-64.9269	8.57453						NaN	NaN	NaN	NaN
NaN	NaN	-64.9418	8.69742						NaN	NaN	NaN	NaN
NaN	NaN	-64.9387	8.58076						NaN	NaN	NaN	NaN
NaN	NaN	-64.6828	8.67886						NaN	NaN	NaN	NaN
NaN	NaN	-65.1958	8.59962						NaN	NaN	NaN	NaN
NaN	NaN	-64.6796	8.56177						NaN	NaN	NaN	NaN
NaN	NaN	-64.9418	8.69742						NaN	NaN	NaN	NaN
NaN	NaN	-64.9387	8.58076						NaN	NaN	NaN	NaN
NaN	NaN	-64.6828	8.67886						NaN	NaN	NaN	NaN
NaN	NaN	-64.9387	8.58076						NaN	NaN	NaN	NaN
NaN	NaN	-64.9387	8.58076						NaN	NaN	NaN	NaN
NaN	NaN	-64.6828	8.67886						NaN	NaN	NaN	NaN
NaN	NaN	-64.9504	8.53662						NaN	NaN	NaN	NaN
NaN	NaN	-64.6952	8.6345						NaN	NaN	NaN	NaN
NaN	NaN	-64.9504	8.53662						NaN	NaN	NaN	NaN
NaN	NaN	-64.9539	8.65322						NaN	NaN	NaN	NaN
NaN	NaN	-64.9417	8.60751						NaN	NaN	NaN	NaN
NaN	NaN	-64.9476	8.70043						NaN	NaN	NaN	NaN
NaN	NaN	-64.4219	8.66016						NaN	NaN	NaN	NaN
NaN	NaN	-64.6828	8.67886						NaN	NaN	NaN	NaN
NaN	NaN	-64.6796	8.56177						NaN	NaN	NaN	NaN
NaN	NaN	-64.4219	8.66016						NaN	NaN	NaN	NaN
NaN	NaN	-65.1958	8.59962						NaN	NaN	NaN	NaN
NaN	NaN	-64.6828	8.67886						NaN	NaN	NaN	NaN
NaN	NaN	-64.6828	8.67886						NaN	NaN	NaN	NaN
NaN	NaN	-64.9418	8.69742						NaN	NaN	NaN	NaN
NaN	NaN	-64.6828	8.67886						NaN	NaN	NaN	NaN
NaN	NaN	-64.6796	8.56177						NaN	NaN	NaN	NaN
NaN	NaN	-64.9418	8.69742						NaN	NaN	NaN	NaN
NaN	NaN	-64.6828	8.67886						NaN	NaN	NaN	NaN
NaN	NaN	-64.9418	8.69742						NaN	NaN	NaN	NaN
NaN	NaN	-64.6828	8.67886						NaN	NaN	NaN	NaN
NaN	NaN	-64.9418	8.69742						NaN	NaN	NaN	NaN
NaN	NaN	-64.6828	8.67886						NaN	NaN	NaN	NaN
NaN	NaN	-64.6828	8.67886						NaN	NaN	NaN	NaN
NaN	NaN	-65.1989	8.71585						NaN	NaN	NaN	NaN
NaN	NaN	-64.9387	8.58076						NaN	NaN	NaN	NaN
NaN	NaN	-64.6796	8.56177						NaN	NaN	NaN	NaN
NaN	NaN	-64.6796	8.56177						NaN	NaN	NaN	NaN
NaN	NaN	-64.6796	8.56177						NaN	NaN	NaN	NaN
NaN	NaN	-64.9418	8.69742						NaN	NaN	NaN	NaN
NaN	NaN	-64.6828	8.67886						NaN	NaN	NaN	NaN
NaN	NaN	-64.6892	8.63143						NaN	NaN	NaN	NaN
NaN	NaN	-65.2016	8.55252						NaN	NaN	NaN	NaN
NaN	NaN	-64.6892	8.63143						NaN	NaN	NaN	NaN
NaN	NaN	-64.6796	8.56177						NaN	NaN	NaN	NaN
NaN	NaN	-64.6796	8.56177						NaN	NaN	NaN	NaN
NaN	NaN	-64.6828	8.67886						NaN	NaN	NaN	NaN
NaN	NaN	-64.9418	8.69742						NaN	NaN	NaN	NaN
NaN	NaN	-64.6828	8.67886						NaN	NaN	NaN	NaN
NaN	NaN	-64.9366	8.46418						NaN	NaN	NaN	NaN
NaN	NaN	-64.9418	8.69742						NaN	NaN	NaN	NaN
NaN	NaN	-64.9387	8.58076						NaN	NaN	NaN	NaN
NaN	NaN	-64.9387	8.58076						NaN	NaN	NaN	NaN
NaN	NaN	-64.9366	8.46418						NaN	NaN	NaN	NaN
NaN	NaN	-64.6828	8.67886						NaN	NaN	NaN	NaN
NaN	NaN	-64.6796	8.56177						NaN	NaN	NaN	NaN
NaN	NaN	-64.6796	8.56177						NaN	NaN	NaN	NaN
NaN	NaN	-64.6828	8.67886						NaN	NaN	NaN	NaN
NaN	NaN	-64.6828	8.67886						NaN	NaN	NaN	NaN
NaN	NaN	-64.6828	8.67886						NaN	NaN	NaN	NaN
NaN	NaN	-64.6796	8.56177						NaN	NaN	NaN	NaN
NaN	NaN	-64.6796	8.56177						NaN	NaN	NaN	NaN
NaN	NaN	-64.9387	8.58076						NaN	NaN	NaN	NaN
NaN	NaN	-64.9387	8.58076						NaN	NaN	NaN	NaN
NaN	NaN	-64.6828	8.67886						NaN	NaN	NaN	NaN
NaN	NaN	-64.6828	8.67886						NaN	NaN	NaN	NaN
NaN	NaN	-64.9387	8.58076						NaN	NaN	NaN	NaN
NaN	NaN	-64.9387	8.58076						NaN	NaN	NaN	NaN
NaN	NaN	-64.6828	8.67886						NaN	NaN	NaN	NaN
NaN	NaN	-64.9387	8.58076						NaN	NaN	NaN	NaN
NaN	NaN	-64.6828	8.67886						NaN	NaN	NaN	NaN
NaN	NaN	-64.9387	8.58076						NaN	NaN	NaN	NaN
NaN	NaN	-64.6828	8.67886						NaN	NaN	NaN	NaN
NaN	NaN	-64.9418	8.69742						NaN	NaN	NaN	NaN
NaN	NaN	-64.6796	8.56177						NaN	NaN	NaN	NaN
NaN	NaN	-64.9418	8.69742						NaN	NaN	NaN	NaN
NaN	NaN	-64.6796	8.56177						NaN	NaN	NaN	NaN
NaN	NaN	-64.6828	8.67886						NaN	NaN	NaN	NaN
NaN	NaN	-64.9387	8.58076						NaN	NaN	NaN	NaN
NaN	NaN	-64.686	8.65514						NaN	NaN	NaN	NaN
NaN	NaN	-64.6952	8.6345						NaN	NaN	NaN	NaN
NaN	NaN	-64.6952	8.6345						NaN	NaN	NaN	NaN
NaN	NaN	-64.9539	8.65322						NaN	NaN	NaN	NaN
NaN	NaN	-64.6952	8.6345						NaN	NaN	NaN	NaN
NaN	NaN	-64.6916	8.51747						NaN	NaN	NaN	NaN
NaN	NaN	-64.9539	8.65322						NaN	NaN	NaN	NaN
NaN	NaN	-65.2072	8.55563						NaN	NaN	NaN	NaN
NaN	NaN	-64.6916	8.51747						NaN	NaN	NaN	NaN
NaN	NaN	-64.6952	8.6345						NaN	NaN	NaN	NaN
NaN	NaN	-64.9504	8.53662						NaN	NaN	NaN	NaN
NaN	NaN	-64.6857	8.5649						NaN	NaN	NaN	NaN
NaN	NaN	-64.9418	8.69742						NaN	NaN	NaN	NaN
NaN	NaN	-64.9418	8.69742						NaN	NaN	NaN	NaN
NaN	NaN	-64.6796	8.56177						NaN	NaN	NaN	NaN
NaN	NaN	-64.9418	8.69742						NaN	NaN	NaN	NaN
NaN	NaN	-64.9387	8.58076						NaN	NaN	NaN	NaN
NaN	NaN	-65.1958	8.59962						NaN	NaN	NaN	NaN
NaN	NaN	-64.6828	8.67886						NaN	NaN	NaN	NaN
NaN	NaN	-64.9387	8.58076						NaN	NaN	NaN	NaN
NaN	NaN	-64.4263	8.77777						NaN	NaN	NaN	NaN
NaN	NaN	-64.6828	8.67886						NaN	NaN	NaN	NaN
NaN	NaN	-64.6828	8.67886						NaN	NaN	NaN	NaN
NaN	NaN	-64.9418	8.69742						NaN	NaN	NaN	NaN
NaN	NaN	-64.6828	8.67886						NaN	NaN	NaN	NaN
NaN	NaN	-64.6828	8.67886						NaN	NaN	NaN	NaN
NaN	NaN	-64.9418	8.69742						NaN	NaN	NaN	NaN
NaN	NaN	-64.9387	8.58076						NaN	NaN	NaN	NaN
NaN	NaN	-64.9387	8.58076						NaN	NaN	NaN	NaN
NaN	NaN	-64.6828	8.67886						NaN	NaN	NaN	NaN
NaN	NaN	-65.1958	8.59962						NaN	NaN	NaN	NaN
NaN	NaN	-64.6897	8.66443						NaN	NaN	NaN	NaN
NaN	NaN	-64.6897	8.66443						NaN	NaN	NaN	NaN
NaN	NaN	-65.2001	8.46926						NaN	NaN	NaN	NaN
NaN	NaN	-64.9452	8.56644						NaN	NaN	NaN	NaN
NaN	NaN	-64.9485	8.68304						NaN	NaN	NaN	NaN
NaN	NaN	-64.9452	8.56644						NaN	NaN	NaN	NaN
NaN	NaN	-64.9485	8.68304						NaN	NaN	NaN	NaN
NaN	NaN	-64.9485	8.68304						NaN	NaN	NaN	NaN
NaN	NaN	-64.9485	8.68304						NaN	NaN	NaN	NaN
NaN	NaN	-64.6897	8.66443						NaN	NaN	NaN	NaN
NaN	NaN	-64.6863	8.5474						NaN	NaN	NaN	NaN
NaN	NaN	-64.943	8.44992						NaN	NaN	NaN	NaN
NaN	NaN	-64.6863	8.5474						NaN	NaN	NaN	NaN
NaN	NaN	-64.6897	8.66443						NaN	NaN	NaN	NaN
NaN	NaN	-64.6863	8.5474						NaN	NaN	NaN	NaN
NaN	NaN	-64.6897	8.66443						NaN	NaN	NaN	NaN
NaN	NaN	-64.6897	8.66443						NaN	NaN	NaN	NaN
NaN	NaN	-64.6941	8.78153						NaN	NaN	NaN	NaN
NaN	NaN	-64.9485	8.68304						NaN	NaN	NaN	NaN
NaN	NaN	-64.9452	8.56644						NaN	NaN	NaN	NaN
NaN	NaN	-64.9452	8.56644						NaN	NaN	NaN	NaN
NaN	NaN	-64.9452	8.56644						NaN	NaN	NaN	NaN
NaN	NaN	-64.6897	8.66443						NaN	NaN	NaN	NaN
NaN	NaN	-64.9485	8.68304						NaN	NaN	NaN	NaN
NaN	NaN	-64.6897	8.66443						NaN	NaN	NaN	NaN
NaN	NaN	-64.9485	8.68304						NaN	NaN	NaN	NaN
NaN	NaN	-64.6897	8.66443						NaN	NaN	NaN	NaN
NaN	NaN	-64.9452	8.56644						NaN	NaN	NaN	NaN
NaN	NaN	-64.6897	8.66443						NaN	NaN	NaN	NaN
NaN	NaN	-64.9452	8.56644						NaN	NaN	NaN	NaN
NaN	NaN	-64.9452	8.56644						NaN	NaN	NaN	NaN
NaN	NaN	-64.9452	8.56644						NaN	NaN	NaN	NaN
NaN	NaN	-64.9452	8.56644						NaN	NaN	NaN	NaN
NaN	NaN	-64.9452	8.56644						NaN	NaN	NaN	NaN
NaN	NaN	-64.9485	8.68304						NaN	NaN	NaN	NaN
NaN	NaN	-64.6897	8.66443						NaN	NaN	NaN	NaN
NaN	NaN	-64.9485	8.68304						NaN	NaN	NaN	NaN
NaN	NaN	-64.6897	8.66443						NaN	NaN	NaN	NaN
NaN	NaN	-64.9485	8.68304						NaN	NaN	NaN	NaN
NaN	NaN	-65.2054	8.70151						NaN	NaN	NaN	NaN
NaN	NaN	-64.6897	8.66443						NaN	NaN	NaN	NaN
NaN	NaN	-64.9452	8.56644						NaN	NaN	NaN	NaN
NaN	NaN	-64.6897	8.66443						NaN	NaN	NaN	NaN
NaN	NaN	-64.9452	8.56644						NaN	NaN	NaN	NaN
NaN	NaN	-64.6897	8.66443						NaN	NaN	NaN	NaN
NaN	NaN	-64.6897	8.66443						NaN	NaN	NaN	NaN
NaN	NaN	-65.2022	8.58534						NaN	NaN	NaN	NaN
NaN	NaN	-64.6863	8.5474						NaN	NaN	NaN	NaN
NaN	NaN	-64.9452	8.56644						NaN	NaN	NaN	NaN
NaN	NaN	-64.9452	8.56644						NaN	NaN	NaN	NaN
NaN	NaN	-64.9485	8.68304						NaN	NaN	NaN	NaN
NaN	NaN	-64.6863	8.5474						NaN	NaN	NaN	NaN
NaN	NaN	-64.9452	8.56644						NaN	NaN	NaN	NaN
NaN	NaN	-64.9485	8.68304						NaN	NaN	NaN	NaN
NaN	NaN	-64.9485	8.68304						NaN	NaN	NaN	NaN
NaN	NaN	-64.6897	8.66443						NaN	NaN	NaN	NaN
NaN	NaN	-64.6897	8.66443						NaN	NaN	NaN	NaN
NaN	NaN	-64.9452	8.56644						NaN	NaN	NaN	NaN
NaN	NaN	-64.429	8.64569						NaN	NaN	NaN	NaN
NaN	NaN	-64.9485	8.68304						NaN	NaN	NaN	NaN
NaN	NaN	-64.9528	8.7997						NaN	NaN	NaN	NaN
NaN	NaN	-64.6897	8.66443						NaN	NaN	NaN	NaN
NaN	NaN	-64.9485	8.68304						NaN	NaN	NaN	NaN
NaN	NaN	-64.9452	8.56644						NaN	NaN	NaN	NaN
NaN	NaN	-64.6897	8.66443						NaN	NaN	NaN	NaN
NaN	NaN	-64.6863	8.5474						NaN	NaN	NaN	NaN
NaN	NaN	-64.6863	8.5474						NaN	NaN	NaN	NaN
NaN	NaN	-64.6863	8.5474						NaN	NaN	NaN	NaN
NaN	NaN	-64.6941	8.78153						NaN	NaN	NaN	NaN
NaN	NaN	-64.9452	8.56644						NaN	NaN	NaN	NaN
NaN	NaN	-65.2022	8.58534						NaN	NaN	NaN	NaN
NaN	NaN	-64.429	8.64569						NaN	NaN	NaN	NaN
NaN	NaN	-64.9452	8.56644						NaN	NaN	NaN	NaN
NaN	NaN	-64.6897	8.66443						NaN	NaN	NaN	NaN
NaN	NaN	-64.9452	8.56644						NaN	NaN	NaN	NaN
NaN	NaN	-64.9452	8.56644						NaN	NaN	NaN	NaN
NaN	NaN	-64.6897	8.66443						NaN	NaN	NaN	NaN
NaN	NaN	-64.6897	8.66443						NaN	NaN	NaN	NaN
NaN	NaN	-64.6897	8.66443						NaN	NaN	NaN	NaN
NaN	NaN	-64.6897	8.66443						NaN	NaN	NaN	NaN
NaN	NaN	-64.429	8.64569						NaN	NaN	NaN	NaN
NaN	NaN	-64.6897	8.66443						NaN	NaN	NaN	NaN
NaN	NaN	-64.6897	8.66443						NaN	NaN	NaN	NaN
NaN	NaN	-64.6897	8.66443						NaN	NaN	NaN	NaN
NaN	NaN	-64.6897	8.66443						NaN	NaN	NaN	NaN
NaN	NaN	-64.6897	8.66443						NaN	NaN	NaN	NaN
NaN	NaN	-64.6863	8.5474						NaN	NaN	NaN	NaN
NaN	NaN	-64.6897	8.66443						NaN	NaN	NaN	NaN
NaN	NaN	-64.6863	8.5474						NaN	NaN	NaN	NaN
NaN	NaN	-64.6897	8.66443						NaN	NaN	NaN	NaN
NaN	NaN	-64.6897	8.66443						NaN	NaN	NaN	NaN
NaN	NaN	-64.6897	8.66443						NaN	NaN	NaN	NaN
NaN	NaN	-64.6897	8.66443						NaN	NaN	NaN	NaN
NaN	NaN	-64.6897	8.66443						NaN	NaN	NaN	NaN
NaN	NaN	-64.6863	8.5474						NaN	NaN	NaN	NaN
NaN	NaN	-64.9452	8.56644						NaN	NaN	NaN	NaN
NaN	NaN	-64.9452	8.56644						NaN	NaN	NaN	NaN
NaN	NaN	-64.429	8.64569						NaN	NaN	NaN	NaN
NaN	NaN	-64.6897	8.66443						NaN	NaN	NaN	NaN
NaN	NaN	-64.9452	8.56644						NaN	NaN	NaN	NaN
NaN	NaN	-64.6863	8.5474						NaN	NaN	NaN	NaN
NaN	NaN	-64.9452	8.56644						NaN	NaN	NaN	NaN
NaN	NaN	-64.9452	8.56644						NaN	NaN	NaN	NaN
NaN	NaN	-64.6897	8.66443						NaN	NaN	NaN	NaN
NaN	NaN	-64.9485	8.68304						NaN	NaN	NaN	NaN
NaN	NaN	-65.2022	8.58534						NaN	NaN	NaN	NaN
NaN	NaN	-65.2022	8.58534						NaN	NaN	NaN	NaN
NaN	NaN	-64.9205	8.6686						NaN	NaN	NaN	NaN
NaN	NaN	-64.6897	8.66443						NaN	NaN	NaN	NaN
NaN	NaN	-64.6863	8.5474						NaN	NaN	NaN	NaN
NaN	NaN	-64.9452	8.56644						NaN	NaN	NaN	NaN
NaN	NaN	-64.6897	8.66443						NaN	NaN	NaN	NaN
NaN	NaN	-64.9485	8.68304						NaN	NaN	NaN	NaN
NaN	NaN	-64.6897	8.66443						NaN	NaN	NaN	NaN
NaN	NaN	-64.9452	8.56644						NaN	NaN	NaN	NaN
NaN	NaN	-64.6863	8.5474						NaN	NaN	NaN	NaN
NaN	NaN	-64.9485	8.68304						NaN	NaN	NaN	NaN
NaN	NaN	-64.6863	8.5474						NaN	NaN	NaN	NaN
NaN	NaN	-64.6863	8.5474						NaN	NaN	NaN	NaN
NaN	NaN	-64.6897	8.66443						NaN	NaN	NaN	NaN
NaN	NaN	-64.9452	8.56644						NaN	NaN	NaN	NaN
NaN	NaN	-64.6863	8.5474						NaN	NaN	NaN	NaN
NaN	NaN	-64.9452	8.56644						NaN	NaN	NaN	NaN
NaN	NaN	-64.6897	8.66443						NaN	NaN	NaN	NaN
NaN	NaN	-64.9485	8.68304						NaN	NaN	NaN	NaN
NaN	NaN	-64.6863	8.5474						NaN	NaN	NaN	NaN
NaN	NaN	-64.9452	8.56644						NaN	NaN	NaN	NaN
NaN	NaN	-64.6863	8.5474						NaN	NaN	NaN	NaN
NaN	NaN	-64.6897	8.66443						NaN	NaN	NaN	NaN
NaN	NaN	-64.6897	8.66443						NaN	NaN	NaN	NaN
NaN	NaN	-64.9452	8.56644						NaN	NaN	NaN	NaN
NaN	NaN	-64.6897	8.66443						NaN	NaN	NaN	NaN
NaN	NaN	-64.6897	8.66443						NaN	NaN	NaN	NaN
NaN	NaN	-64.9452	8.56644						NaN	NaN	NaN	NaN
NaN	NaN	-64.6941	8.78153						NaN	NaN	NaN	NaN
NaN	NaN	-64.9485	8.68304						NaN	NaN	NaN	NaN
NaN	NaN	-64.9485	8.68304						NaN	NaN	NaN	NaN
NaN	NaN	-64.9485	8.68304						NaN	NaN	NaN	NaN
NaN	NaN	-64.429	8.64569						NaN	NaN	NaN	NaN
NaN	NaN	-64.9485	8.68304						NaN	NaN	NaN	NaN
NaN	NaN	-64.9452	8.56644						NaN	NaN	NaN	NaN
NaN	NaN	-64.9452	8.56644						NaN	NaN	NaN	NaN
NaN	NaN	-64.9452	8.56644						NaN	NaN	NaN	NaN
NaN	NaN	-64.9452	8.56644						NaN	NaN	NaN	NaN
NaN	NaN	-64.6897	8.66443						NaN	NaN	NaN	NaN
NaN	NaN	-64.6897	8.66443						NaN	NaN	NaN	NaN
NaN	NaN	-64.6897	8.66443						NaN	NaN	NaN	NaN
NaN	NaN	-64.6897	8.66443						NaN	NaN	NaN	NaN
NaN	NaN	-64.9452	8.56644						NaN	NaN	NaN	NaN
NaN	NaN	-64.6897	8.66443						NaN	NaN	NaN	NaN
NaN	NaN	-64.6897	8.66443						NaN	NaN	NaN	NaN
NaN	NaN	-64.6863	8.5474						NaN	NaN	NaN	NaN
NaN	NaN	-64.9485	8.68304						NaN	NaN	NaN	NaN
NaN	NaN	-64.9452	8.56644						NaN	NaN	NaN	NaN
NaN	NaN	-64.6897	8.66443						NaN	NaN	NaN	NaN
NaN	NaN	-64.9452	8.56644						NaN	NaN	NaN	NaN
NaN	NaN	-64.9452	8.56644						NaN	NaN	NaN	NaN
NaN	NaN	-64.6897	8.66443						NaN	NaN	NaN	NaN
NaN	NaN	-64.9485	8.68304						NaN	NaN	NaN	NaN
NaN	NaN	-64.6897	8.66443						NaN	NaN	NaN	NaN
NaN	NaN	-64.6897	8.66443						NaN	NaN	NaN	NaN
NaN	NaN	-64.6897	8.66443						NaN	NaN	NaN	NaN
NaN	NaN	-64.6863	8.5474						NaN	NaN	NaN	NaN
NaN	NaN	-64.6863	8.5474						NaN	NaN	NaN	NaN
NaN	NaN	-64.6863	8.5474						NaN	NaN	NaN	NaN
NaN	NaN	-64.6897	8.66443						NaN	NaN	NaN	NaN
NaN	NaN	-64.6863	8.5474						NaN	NaN	NaN	NaN
NaN	NaN	-64.9452	8.56644						NaN	NaN	NaN	NaN
NaN	NaN	-64.6897	8.66443						NaN	NaN	NaN	NaN
NaN	NaN	-64.6897	8.66443						NaN	NaN	NaN	NaN
NaN	NaN	-64.943	8.44992						NaN	NaN	NaN	NaN
NaN	NaN	-64.6897	8.66443						NaN	NaN	NaN	NaN
NaN	NaN	-64.6897	8.66443						NaN	NaN	NaN	NaN
NaN	NaN	-64.9485	8.68304						NaN	NaN	NaN	NaN
NaN	NaN	-64.6897	8.66443						NaN	NaN	NaN	NaN
NaN	NaN	-64.6897	8.66443						NaN	NaN	NaN	NaN
NaN	NaN	-64.6897	8.66443						NaN	NaN	NaN	NaN
NaN	NaN	-64.6863	8.5474						NaN	NaN	NaN	NaN
NaN	NaN	-64.9485	8.68304						NaN	NaN	NaN	NaN
NaN	NaN	-64.6897	8.66443						NaN	NaN	NaN	NaN
NaN	NaN	-64.6897	8.66443						NaN	NaN	NaN	NaN
NaN	NaN	-64.9452	8.56644						NaN	NaN	NaN	NaN
NaN	NaN	-64.6863	8.5474						NaN	NaN	NaN	NaN
NaN	NaN	-64.9485	8.68304						NaN	NaN	NaN	NaN
NaN	NaN	-64.9452	8.56644						NaN	NaN	NaN	NaN
NaN	NaN	-64.6897	8.66443						NaN	NaN	NaN	NaN
NaN	NaN	-64.6863	8.5474						NaN	NaN	NaN	NaN
NaN	NaN	-64.9452	8.56644						NaN	NaN	NaN	NaN
NaN	NaN	-64.6863	8.5474						NaN	NaN	NaN	NaN
NaN	NaN	-64.429	8.64569						NaN	NaN	NaN	NaN
NaN	NaN	-64.6897	8.66443						NaN	NaN	NaN	NaN
NaN	NaN	-65.2022	8.58534						NaN	NaN	NaN	NaN
NaN	NaN	-64.943	8.44992						NaN	NaN	NaN	NaN
NaN	NaN	-64.9452	8.56644						NaN	NaN	NaN	NaN
NaN	NaN	-64.6897	8.66443						NaN	NaN	NaN	NaN
NaN	NaN	-64.9452	8.56644						NaN	NaN	NaN	NaN
NaN	NaN	-64.6897	8.66443						NaN	NaN	NaN	NaN
NaN	NaN	-64.9452	8.56644						NaN	NaN	NaN	NaN
NaN	NaN	-64.9485	8.68304						NaN	NaN	NaN	NaN
NaN	NaN	-64.6863	8.5474						NaN	NaN	NaN	NaN
NaN	NaN	-64.9452	8.56644						NaN	NaN	NaN	NaN
NaN	NaN	-64.6897	8.66443						NaN	NaN	NaN	NaN
NaN	NaN	-64.9452	8.56644						NaN	NaN	NaN	NaN
NaN	NaN	-64.6897	8.66443						NaN	NaN	NaN	NaN
NaN	NaN	-64.6897	8.66443						NaN	NaN	NaN	NaN
NaN	NaN	-64.6863	8.5474						NaN	NaN	NaN	NaN
NaN	NaN	-64.6897	8.66443						NaN	NaN	NaN	NaN
NaN	NaN	-64.6863	8.5474						NaN	NaN	NaN	NaN
NaN	NaN	-64.9452	8.56644						NaN	NaN	NaN	NaN
NaN	NaN	-64.6897	8.66443						NaN	NaN	NaN	NaN
NaN	NaN	-64.9452	8.56644						NaN	NaN	NaN	NaN
NaN	NaN	-64.6863	8.5474						NaN	NaN	NaN	NaN
NaN	NaN	-64.9452	8.56644						NaN	NaN	NaN	NaN
NaN	NaN	-64.943	8.44992						NaN	NaN	NaN	NaN
NaN	NaN	-64.6897	8.66443						NaN	NaN	NaN	NaN
NaN	NaN	-64.9452	8.56644						NaN	NaN	NaN	NaN
NaN	NaN	-64.9452	8.56644						NaN	NaN	NaN	NaN
NaN	NaN	-64.9452	8.56644						NaN	NaN	NaN	NaN
NaN	NaN	-64.9485	8.68304						NaN	NaN	NaN	NaN
NaN	NaN	-64.6897	8.66443						NaN	NaN	NaN	NaN
NaN	NaN	-64.9452	8.56644						NaN	NaN	NaN	NaN
NaN	NaN	-64.429	8.64569						NaN	NaN	NaN	NaN
NaN	NaN	-65.2022	8.58534						NaN	NaN	NaN	NaN
NaN	NaN	-64.6863	8.5474						NaN	NaN	NaN	NaN
NaN	NaN	-64.6897	8.66443						NaN	NaN	NaN	NaN
NaN	NaN	-64.9452	8.56644						NaN	NaN	NaN	NaN
NaN	NaN	-64.9452	8.56644						NaN	NaN	NaN	NaN
NaN	NaN	-64.6897	8.66443						NaN	NaN	NaN	NaN
NaN	NaN	-64.6863	8.5474						NaN	NaN	NaN	NaN
NaN	NaN	-64.6897	8.66443						NaN	NaN	NaN	NaN
NaN	NaN	-64.6897	8.66443						NaN	NaN	NaN	NaN
NaN	NaN	-64.6863	8.5474						NaN	NaN	NaN	NaN
NaN	NaN	-64.9452	8.56644						NaN	NaN	NaN	NaN
NaN	NaN	-65.2022	8.58534						NaN	NaN	NaN	NaN
NaN	NaN	-64.6941	8.78153						NaN	NaN	NaN	NaN
NaN	NaN	-64.6897	8.66443						NaN	NaN	NaN	NaN
NaN	NaN	-64.9452	8.56644						NaN	NaN	NaN	NaN
NaN	NaN	-64.6897	8.66443						NaN	NaN	NaN	NaN
NaN	NaN	-64.6863	8.5474						NaN	NaN	NaN	NaN
NaN	NaN	-64.6897	8.66443						NaN	NaN	NaN	NaN
NaN	NaN	-64.6863	8.5474						NaN	NaN	NaN	NaN
NaN	NaN	-64.9485	8.68304						NaN	NaN	NaN	NaN
NaN	NaN	-64.9485	8.68304						NaN	NaN	NaN	NaN
NaN	NaN	-64.6897	8.66443						NaN	NaN	NaN	NaN
NaN	NaN	-64.6863	8.5474						NaN	NaN	NaN	NaN
NaN	NaN	-64.6897	8.66443						NaN	NaN	NaN	NaN
NaN	NaN	-64.6897	8.66443						NaN	NaN	NaN	NaN
NaN	NaN	-64.9452	8.56644						NaN	NaN	NaN	NaN
NaN	NaN	-64.9452	8.56644						NaN	NaN	NaN	NaN
NaN	NaN	-64.6863	8.5474						NaN	NaN	NaN	NaN
NaN	NaN	-64.6897	8.66443						NaN	NaN	NaN	NaN
NaN	NaN	-64.9452	8.56644						NaN	NaN	NaN	NaN
NaN	NaN	-64.9485	8.68304						NaN	NaN	NaN	NaN
NaN	NaN	-64.9485	8.68304						NaN	NaN	NaN	NaN
NaN	NaN	-64.6897	8.66443						NaN	NaN	NaN	NaN
NaN	NaN	-64.429	8.64569						NaN	NaN	NaN	NaN
NaN	NaN	-64.6897	8.66443						NaN	NaN	NaN	NaN
NaN	NaN	-64.9452	8.56644						NaN	NaN	NaN	NaN
NaN	NaN	-64.9452	8.56644						NaN	NaN	NaN	NaN
NaN	NaN	-64.9485	8.68304						NaN	NaN	NaN	NaN
NaN	NaN	-64.9452	8.56644						NaN	NaN	NaN	NaN
NaN	NaN	-64.9485	8.68304						NaN	NaN	NaN	NaN
NaN	NaN	-64.9452	8.56644						NaN	NaN	NaN	NaN
NaN	NaN	-64.9485	8.68304						NaN	NaN	NaN	NaN
NaN	NaN	-64.6897	8.66443						NaN	NaN	NaN	NaN
NaN	NaN	-64.9452	8.56644						NaN	NaN	NaN	NaN
NaN	NaN	-64.9485	8.68304						NaN	NaN	NaN	NaN
NaN	NaN	-65.2054	8.70151						NaN	NaN	NaN	NaN
NaN	NaN	-64.9485	8.68304						NaN	NaN	NaN	NaN
NaN	NaN	-64.9485	8.68304						NaN	NaN	NaN	NaN
NaN	NaN	-64.9485	8.68304						NaN	NaN	NaN	NaN
NaN	NaN	-64.9485	8.68304						NaN	NaN	NaN	NaN
NaN	NaN	-64.9452	8.56644						NaN	NaN	NaN	NaN
NaN	NaN	-64.9485	8.68304						NaN	NaN	NaN	NaN
NaN	NaN	-64.429	8.64569						NaN	NaN	NaN	NaN
NaN	NaN	-64.9452	8.56644						NaN	NaN	NaN	NaN
NaN	NaN	-64.9485	8.68304						NaN	NaN	NaN	NaN
NaN	NaN	-64.9452	8.56644						NaN	NaN	NaN	NaN
NaN	NaN	-64.9452	8.56644						NaN	NaN	NaN	NaN
NaN	NaN	-64.6897	8.66443						NaN	NaN	NaN	NaN
NaN	NaN	-64.6897	8.66443						NaN	NaN	NaN	NaN
NaN	NaN	-64.6897	8.66443						NaN	NaN	NaN	NaN
NaN	NaN	-64.9485	8.68304						NaN	NaN	NaN	NaN
NaN	NaN	-64.9452	8.56644						NaN	NaN	NaN	NaN
NaN	NaN	-64.6897	8.66443						NaN	NaN	NaN	NaN
NaN	NaN	-64.9452	8.56644						NaN	NaN	NaN	NaN
NaN	NaN	-64.6897	8.66443						NaN	NaN	NaN	NaN
NaN	NaN	-64.6897	8.66443						NaN	NaN	NaN	NaN
NaN	NaN	-64.6897	8.66443						NaN	NaN	NaN	NaN
NaN	NaN	-64.9452	8.56644						NaN	NaN	NaN	NaN
NaN	NaN	-64.9452	8.56644						NaN	NaN	NaN	NaN
NaN	NaN	-64.6897	8.66443						NaN	NaN	NaN	NaN
NaN	NaN	-64.6897	8.66443						NaN	NaN	NaN	NaN
NaN	NaN	-64.9485	8.68304						NaN	NaN	NaN	NaN
NaN	NaN	-64.6863	8.5474						NaN	NaN	NaN	NaN
NaN	NaN	-64.6897	8.66443						NaN	NaN	NaN	NaN
NaN	NaN	-64.9485	8.68304						NaN	NaN	NaN	NaN
NaN	NaN	-64.9485	8.68304						NaN	NaN	NaN	NaN
NaN	NaN	-64.6897	8.66443						NaN	NaN	NaN	NaN
NaN	NaN	-65.2022	8.58534						NaN	NaN	NaN	NaN
NaN	NaN	-65.2022	8.58534						NaN	NaN	NaN	NaN
NaN	NaN	-64.6897	8.66443						NaN	NaN	NaN	NaN
NaN	NaN	-64.9485	8.68304						NaN	NaN	NaN	NaN
NaN	NaN	-65.2054	8.70151						NaN	NaN	NaN	NaN
NaN	NaN	-65.2054	8.70151						NaN	NaN	NaN	NaN
NaN	NaN	-64.9452	8.56644						NaN	NaN	NaN	NaN
NaN	NaN	-64.9452	8.56644						NaN	NaN	NaN	NaN
NaN	NaN	-65.2022	8.58534						NaN	NaN	NaN	NaN
NaN	NaN	-64.9485	8.68304						NaN	NaN	NaN	NaN
NaN	NaN	-65.2054	8.70151						NaN	NaN	NaN	NaN
NaN	NaN	-64.9485	8.68304						NaN	NaN	NaN	NaN
NaN	NaN	-65.2022	8.58534						NaN	NaN	NaN	NaN
NaN	NaN	-64.9485	8.68304						NaN	NaN	NaN	NaN
NaN	NaN	-64.6897	8.66443						NaN	NaN	NaN	NaN
NaN	NaN	-64.9485	8.68304						NaN	NaN	NaN	NaN
NaN	NaN	-64.9485	8.68304						NaN	NaN	NaN	NaN
NaN	NaN	-64.9485	8.68304						NaN	NaN	NaN	NaN
NaN	NaN	-64.9485	8.68304						NaN	NaN	NaN	NaN
NaN	NaN	-64.9485	8.68304						NaN	NaN	NaN	NaN
NaN	NaN	-65.2022	8.58534						NaN	NaN	NaN	NaN
NaN	NaN	-64.9452	8.56644						NaN	NaN	NaN	NaN
NaN	NaN	-65.2022	8.58534						NaN	NaN	NaN	NaN
NaN	NaN	-64.9485	8.68304						NaN	NaN	NaN	NaN
NaN	NaN	-64.9485	8.68304						NaN	NaN	NaN	NaN
NaN	NaN	-65.2054	8.70151						NaN	NaN	NaN	NaN
NaN	NaN	-64.9485	8.68304						NaN	NaN	NaN	NaN
NaN	NaN	-64.9485	8.68304						NaN	NaN	NaN	NaN
NaN	NaN	-64.9452	8.56644						NaN	NaN	NaN	NaN
NaN	NaN	-64.9452	8.56644						NaN	NaN	NaN	NaN
NaN	NaN	-64.9485	8.68304						NaN	NaN	NaN	NaN
NaN	NaN	-64.9485	8.68304						NaN	NaN	NaN	NaN
NaN	NaN	-65.2022	8.58534						NaN	NaN	NaN	NaN
NaN	NaN	-64.6897	8.66443						NaN	NaN	NaN	NaN
NaN	NaN	-64.9485	8.68304						NaN	NaN	NaN	NaN
NaN	NaN	-65.2022	8.58534						NaN	NaN	NaN	NaN
NaN	NaN	-64.9452	8.56644						NaN	NaN	NaN	NaN
NaN	NaN	-64.9452	8.56644						NaN	NaN	NaN	NaN
NaN	NaN	-65.2054	8.70151						NaN	NaN	NaN	NaN
NaN	NaN	-64.6863	8.5474						NaN	NaN	NaN	NaN
NaN	NaN	-64.6897	8.66443						NaN	NaN	NaN	NaN
NaN	NaN	-64.9485	8.68304						NaN	NaN	NaN	NaN
NaN	NaN	-64.6897	8.66443						NaN	NaN	NaN	NaN
NaN	NaN	-64.9452	8.56644						NaN	NaN	NaN	NaN
NaN	NaN	-64.9485	8.68304						NaN	NaN	NaN	NaN
NaN	NaN	-64.9452	8.56644						NaN	NaN	NaN	NaN
NaN	NaN	-64.6897	8.66443						NaN	NaN	NaN	NaN
NaN	NaN	-64.6897	8.66443						NaN	NaN	NaN	NaN
NaN	NaN	-64.9485	8.68304						NaN	NaN	NaN	NaN
NaN	NaN	-65.1752	8.57058						NaN	NaN	NaN	NaN
NaN	NaN	-64.6897	8.66443						NaN	NaN	NaN	NaN
NaN	NaN	-64.6897	8.66443						NaN	NaN	NaN	NaN
[truncated: 545,121+ more rows]

## Sheet: 2B
Left panel																				Right panel							Mouse - Detect
	Mouse -All		Mouse - Detect		Mouse - Track		Cricket-All		Cricket-Detect		Cricket-Track		Nframes mice	Nframes mice	Nframes mice	Nframes cricket	Nframes cricket	Nframes cricket	Nmice		Mouse -All		Nframes mice	Nframes mice	Nframes mice	Nmice	X(cm)
	X(cm)	Y(cm)	X(cm)	Y(cm)	X(cm)	Y(cm)	X(cm)	Y(cm)	X(cm)	Y(cm)	X(cm)	Y(cm)	All frames	Det	Track	All frames	Det	Track	1		X(cm)	Y(cm)	All frames	Det	Track	1	Section 1	-76.5918	-76.5365	-76.6347	-76.6266	-76.7963	-76.6823	-76.7448	-76.8864	-76.9309	-76.9814	-77.0222	-77.1586	-77.1472	-77.1715	-77.4077	-77.4912	-77.4199	-77.443	-77.8235	-77.8426	-78.2187	-77.8521
	-104.63	-27.7224	-104.63	-27.7224	-104.69	-18.6346	-76.1912	-13.3969	-76.1912	-13.3969	-76.2184	-13.3245	337	101	183	337	101	183			NaN	NaN	547118				Section 2	-72.1054	-71.7889	-71.8705	-71.8021	-71.8133	-71.6285	-71.3232	-71.3297	-71.1392	-71.0342	-70.877	-70.8138	-70.6906	-70.4508	-70.3695	-70.2874	-70.0951	-70.1809	-70.0918	-70.0267	-69.7354	-69.5273
	-104.52	-27.5438	-104.52	-27.5438	-104.534	-18.5732	-76.1912	-13.3969	-76.1912	-13.3969	-76.2184	-13.3245	337	101	183	337	101	183			NaN	NaN	67027	3737	8365		Section 3	-105.953	-105.934	-105.922	-105.894	-105.869	-105.858	-105.833	-105.963	-105.895	-105.963	-105.891	-105.883	-106.097	-105.895	-105.991	-105.93	-105.949	-105.963	-105.881	-106.053	-106.134	-106.062
	-104.545	-27.5558	-104.545	-27.5558	-104.433	-18.5322	-76.1912	-13.3969	-76.1912	-13.3969	-76.2184	-13.3245									NaN	NaN					Section 4	-29.631	-29.5963	-29.6032	-29.5584	-29.4156	-29.3725	-29.3998	-29.3275	-29.3247	-29.1962	-28.8403	-28.8592	-28.9039	-29.2225	-29.0138	-28.8414	-28.8483	-28.5986	-28.536	-28.5354	-28.5435	-28.4699
	-104.541	-27.5694	-104.541	-27.5694	-104.412	-18.4558	-76.1912	-13.3969	-76.1912	-13.3969	-76.2178	-13.3083									NaN	NaN					Section 5	-105.996	-105.967	-106.102	-106.076	-106.088	-106.232	-106.273	-106.097	-106.122	-106.174	-106.135	-105.816	-105.85	-106.085	-105.929	-105.987	-105.907	-105.739	-105.782	-105.801	-105.74	-105.728
	-104.692	-27.4667	-104.692	-27.4667	-104.091	-18.3742	-76.1912	-13.3969	-76.1912	-13.3969	-76.2178	-13.3083									NaN	NaN					Section 6	-41.234	-41.0483	-40.8431	-40.8692	-40.802	-40.7375	-40.7698	-40.8204	-40.7912	-40.6261	-40.6558	-40.6506	-40.64	-40.6723	-40.5816	-40.5699	-40.4739	-40.4446	-40.5198	-40.5434	-40.5919	-40.4311
	-104.612	-27.5183	-104.612	-27.5183	-104.026	-18.2071	-76.1912	-13.3969	-76.1912	-13.3969	-76.2178	-13.3083									NaN	NaN					Section 7	-73.4985	-73.4322	-73.3609	-73.3552	-73.5666	-73.183	-73.2971	-73.2416	-73.2122	-73.1763	-73.3881	-73.1236	-73.2861	-73.3153	-73.3458	-73.3684	-73.4614	-73.6144	-73.5767	-73.501	-73.5354	-73.6211
	-104.31	-27.6591	-104.31	-27.6591	-103.874	-18.1705	-76.1912	-13.3969	-76.1912	-13.3969	-76.2178	-13.3083									NaN	NaN					Section 8	-24.6328	-24.6368	-24.7621	-24.7625	-24.9269	-24.9819	-25.0313	-24.7956	-24.6411	-24.705	-24.9184	-24.585	-24.7008	-25.0322	-24.5702	-24.9386	-25.0022	-24.5813	-24.7208	-24.9761	-24.7767	-24.8275
	-104.278	-27.6048	-104.278	-27.6048	-103.679	-18.0131	-76.2105	-13.3999	-76.2105	-13.3999	-76.2031	-13.3198									NaN	NaN					Section 9	-106.604	-106.63	-106.324	-106.481	-106.479	-106.455	-106.273	-106.311	-106.274	-106.206	-106.243	-106.237	-106.093	-106.086	-106.229	-106.079	-106.097	-105.982	-106.065	-106.096	-106.12	-106.082
	-104.297	-27.598	-104.297	-27.598	-103.635	-17.8441	-76.2105	-13.3999	-76.2105	-13.3999	-76.243	-13.3581									NaN	NaN					Section 10	-54.5901	-54.5368	-54.4289	-54.3742	-54.3613	-54.4233	-54.1721	-54.207	-54.3115	-54.3643	-54.0608	-54.0944	-54.2622	-53.9646	-53.9175	-54.0644	-54.0951	-53.9594	-53.915	-54.0264	-53.9536	-53.8325
	-104.384	-27.5974	-104.384	-27.5974	-103.375	-17.8412	-76.2105	-13.3999	-76.2105	-13.3999	-76.243	-13.3581									NaN	NaN					Section 11	-110.005	-109.904	-109.914	-109.782	-109.831	-109.793	-109.787	-109.668	-109.741	-109.659	-109.578	-109.582	-109.531	-109.606	-109.478	-109.487	-109.389	-109.442	-109.494	-109.478	-109.342	-109.445
	-104.576	-27.5146	-104.576	-27.5146	-103.472	-17.7664	-76.2105	-13.3999	-76.2105	-13.3999	-76.2399	-13.3878									NaN	NaN					Section 12	-109.626	-109.782	-109.888	-109.751	-109.867	-109.679	-109.809	-109.843	-109.928	-109.911	-109.737	-109.884	-109.855	-109.93	-109.756	-109.795	-109.849	-109.906	-109.893	-110.012	-110.105	-109.888
	-104.525	-27.3075	-104.525	-27.3075	-103.27	-17.7866	-76.1875	-13.4052	-76.1875	-13.4052	-76.2393	-13.3716									NaN	NaN					Section 13	-30.2277	-30.3048	-30.2788	-30.5332	-30.6875	-30.6173	-30.8181	-30.8376	-31.0817	-31.0839	-30.9515	-31.3465	-31.204	-31.2584	-31.4255	-31.265	-31.6061	-31.6138	-31.6621	-31.6406	-31.7763	-32.0503
	-104.654	-27.2876	-104.654	-27.2876	-103.099	-17.6254	-76.2105	-13.3999	-76.2105	-13.3999	-76.2059	-13.3626									NaN	NaN					Section 14	-46.8826	-46.7298	-46.7374	-46.5862	-46.694	-46.7415	-46.6831	-46.6701	-46.6912	-46.6943	-46.6812	-46.6758	-46.0143	-46.096	-46.1541	-46.1178	-46.4199	-46.4382	-46.4316	-46.4813	-46.2235	-46.3183
	-104.908	-27.1508	-104.908	-27.1508	-103.092	-17.3345	-76.1875	-13.4052	-76.1875	-13.4052	-76.1598	-13.3484									NaN	NaN					Section 15	-24.7682	-24.7144	-24.7848	-24.9099	-24.8714	-24.9386	-24.8401	-25.2237	-24.9459	-25.2895	-24.9761	-25.0884	-25.1902	-25.2544	-25.1915	-25.4359	-25.5365	-25.5191	-25.3345	-25.1425	-25.0929	-25.2269
	-104.591	-26.9769	-104.591	-26.9769	-102.871	-17.352	-76.1875	-13.4052	-76.1875	-13.4052	-76.1598	-13.3484									NaN	NaN					Section 16	-78.3921	-78.3543	-78.6953	-79.1026	-79.3891	-79.6233	-79.8622	-80.2573	-80.486	-80.4733	-81.0059	-81.2735	-81.5228	-81.7881	-81.824	-82.0354	-82.402	-82.6861	-82.7325	-82.8984	-83.2193	-83.4151
	-104.97	-26.9032	-104.97	-26.9032	-102.74	-17.3616	-76.1875	-13.4052	-76.1875	-13.4052	-76.1141	-13.3912									NaN	NaN					Section 17	-108.856	-108.861	-108.733	-108.642	-108.417	-108.795	-108.57	-108.436	-108.325	-108.334	-108.035	-108.046	-107.873	-107.758	-107.506	-107.32	-107.154	-106.95	-107.007	-106.687	-106.52	-106.309
	-104.953	-26.8533	-104.953	-26.8533	-102.667	-17.3217	-76.1875	-13.4052	-76.1875	-13.4052	-76.0285	-13.4281									NaN	NaN					Section 18	-38.7919	-38.7261	-38.743	-38.8016	-38.8417	-38.8225	-38.9503	-38.9241	-38.9372	-38.981	-38.7925	-38.8026	-38.7978	-38.782	-38.7863	-38.8046	-38.8355	-39.0001	-38.9416	-39.0605	-38.9962	-38.9979
	-104.914	-26.9296	-104.914	-26.9296	-102.686	-17.337	-76.1875	-13.4052	-76.1875	-13.4052	-75.9858	-13.5062									NaN	NaN					Section 19	-104.63	-104.52	-104.545	-104.541	-104.692	-104.612	-104.31	-104.278	-104.297	-104.384	-104.576	-104.525	-104.654	-104.908	-104.591	-104.97	-104.953	-104.914	-104.955	-104.915	-104.854	-105.06
	-104.955	-26.6116	-104.955	-26.6116	-102.525	-17.1298	-76.1875	-13.4052	-76.1875	-13.4052	-75.9858	-13.5062									NaN	NaN					Section 20	-59.7776	-59.713	-59.5604	-59.4899	-59.6343	-59.3872	-59.4483	-59.349	-59.3563	-59.3763	-59.2294	-59.1572	-59.2755	-59.0614	-58.9093	-59.204	-58.9372	-58.725	-58.8038	-58.7175	-58.8016	-58.7632
	-104.915	-26.5026	-104.915	-26.5026	-102.598	-17.1889	-76.2231	-13.4408	-76.2231	-13.4408	-75.9194	-13.5493									NaN	NaN					Section 21	-87.8613	-87.8608	-87.8036	-87.7841	-87.8587	-87.7941	-87.7906	-87.8908	-87.8862	-87.9199	-87.9735	-87.9759	-88.0307	-88.04	-88.0088	-88.0172	-88.1545	-88.1001	-88.0024	-87.8567	-87.9897	-87.9173
	-104.854	-26.3368	-104.854	-26.3368	-102.448	-16.9925	-76.2899	-13.4652	-76.2899	-13.4652	-75.8782	-13.5691									NaN	NaN					Section 22	-107.001	-107.044	-107.031	-106.949	-106.968	-106.96	-106.966	-106.983	-106.936	-106.96	-106.994	-107.008	-106.974	-106.964	-107.127	-107.072	-107.049	-107.022	-107.035	-107.102	-107.009	-107.089
	-105.06	-26.2578	-105.06	-26.2578	-102.266	-17.1873	-76.2649	-13.4801	-76.2649	-13.4801	-75.7585	-13.6153									NaN	NaN					Section 23	-104.351	-104.224	-104.264	-104.226	-104.212	-104.287	-104.11	-104.079	-104.124	-104.29	-104.257	-104.09	-104.086	-104.229	-104.261	-104.123	-104.243	-104.07	-104.111	-104.245	-103.943	-104.025
	-104.986	-26.1492	-104.986	-26.1492	-102.24	-17.1695	-76.2649	-13.4801	-76.2649	-13.4801	-75.6857	-13.6621									NaN	NaN					Section 24	-95.6496	-95.4775	-95.4874	-95.3024	-94.9767	-94.9524	-94.546	-94.6883	-94.5431	-94.422	-94.0642	-93.883	-93.7589	-93.6175	-93.2219	-93.1046	-93.0448	-92.755	-92.6297	-92.5328	-92.3493	-92.1551
	-104.984	-25.9633	-104.984	-25.9633	-101.887	-17.2858	-76.2477	-13.4266	-76.2477	-13.4266	-75.623	-13.6947									NaN	NaN					Section 25	-86.5409	-86.3103	-86.0593	-86.0457	-85.7759	-85.6816	-85.4506	-85.242	-85.2794	-84.9339	-84.7757	-84.6794	-84.3594	-84.1677	-84.001	-83.8617	-83.6203	-83.5524	-83.1929	-83.1715	-82.8561	-82.7995
	-105.031	-26.0019	-105.031	-26.0019	-102.037	-17.1049	-76.1887	-13.3898	-76.1887	-13.3898	-75.6552	-13.7598									NaN	NaN					Section 26	-23.1759	-23.123	-22.9958	-23.0877	-23.1519	-23.0892	-22.9844	-22.9951	-23.0394	-23.0503	-23.0958	-22.9357	-23.0642	-22.9998	-22.9674	-23.0249	-23.0183	-23.0253	-22.9908	-23.0116	-23.0321	-23.0386
	-104.896	-25.8188	-104.896	-25.8188	-101.692	-17.1568	-76.2306	-13.3661	-76.2306	-13.3661	-75.5608	-13.7951									NaN	NaN					Section 27	-82.4564	-82.3672	-82.2561	-82.1314	-81.897	-81.7939	-82.1316	-81.7933	-82.0127	-81.6806	-81.5217	-81.5785	-81.5418	-81.6027	-81.2606	-80.9681	-81.0172	-81.0901	-80.8352	-80.7113	-80.6796	-80.345
	-104.98	-25.7435	-104.98	-25.7435	-101.644	-17.2344	-76.2306	-13.3661	-76.2306	-13.3661	-75.5478	-13.8209									NaN	NaN					Section 28	-101.069	-101.136	-101.415	-101.272	-101.402	-101.559	-101.588	-101.739	-101.852	-101.896	-102.154	-102.121	-102.296	-102.32	-102.546	-102.705	-102.706	-102.888	-102.98	-103.161	-103.181	-103.25
	-104.815	-25.678	-104.815	-25.678	-101.478	-17.2668	-76.2306	-13.3661	-76.2306	-13.3661	-75.521	-13.8343									NaN	NaN					Section 29	-81.6237	-81.454	-81.575	-81.4679	-80.9872	-81.1417	-80.6834	-80.8858	-80.8805	-80.8101	-80.6533	-80.3296	-80.2465	-79.9917	-79.8157	-79.6584	-79.4054	-79.3661	-79.366	-79.0842	-78.8731	-78.8294
	-104.828	-25.5053	-104.828	-25.5053	-101.325	-17.2036	-76.25	-13.369	-76.25	-13.369	-75.521	-13.8343									NaN	NaN					Section 30	-35.8488	-36.3234	-36.2401	-36.2879	-36.3522	-36.4943	-36.406	-36.7698	-36.6577	-36.5403	-36.7838	-36.6591	-36.653	-36.8812	-36.8359	-36.8103	-36.8902	-37.0258	-36.8701	-36.9808	-36.9828	-37.1405
	-104.728	-25.3963	-104.728	-25.3963	-101.317	-17.1881	-76.2337	-13.3364	-76.2337	-13.3364	-75.4823	-13.8286									NaN	NaN					Section 31	-105.344	-105.307	-105.503	-105.4	-105.434	-105.485	-105.33	-105.352	-105.351	-105.338	-105.471	-105.366	-105.168	-105.154	-105.597	-105.417	-105.563	-105.511	-105.497	-105.399	-105.54	-105.472
	-104.727	-25.2591	-104.727	-25.2591	-101.26	-17.157	-76.1877	-13.347	-76.1877	-13.347	-75.4823	-13.8286									NaN	NaN					Section 32	-71.3471	-71.4077	-71.3405	-71.6893	-71.5044	-71.6385	-71.6063	-71.6038	-71.8777	-71.9345	-72.0767	-72.1518	-72.0982	-71.9261	-72.0729	-72.4059	-72.4875	-72.483	-72.4941	-72.7057	-72.5245	-72.8105
	-104.863	-25.2047	-104.863	-25.2047	-101.075	-17.1761	-76.1877	-13.347	-76.1877	-13.347	-75.4823	-13.8286									NaN	NaN					Section 33	-29.7197	-29.8241	-29.8488	-29.8905	-29.9914	-30.0072	-30.0092	-29.9647	-30.0618	-29.9259	-30.1162	-30.0401	-29.9607	-29.9583	-29.7936	-29.9652	-29.7991	-29.6066	-29.7392	-29.5487	-29.6047	-29.5456
	-104.927	-25.0519	-104.927	-25.0519	-101.035	-17.0172	-76.1877	-13.347	-76.1877	-13.347	-75.4409	-13.8688									NaN	NaN					Section 34	-105.998	-105.953	-106.002	-105.767	-105.641	-105.514	-105.487	-105.177	-105.16	-105.022	-105.022	-104.821	-104.527	-104.44	-104.452	-104.03	-104.046	-103.863	-103.661	-103.711	-103.649	-103.402
	-104.824	-24.8873	-104.824	-24.8873	-101.138	-17.0691	-76.1883	-13.3632	-76.1883	-13.3632	-75.4304	-13.9046									NaN	NaN					Section 35	-23.9699	-23.8819	-23.9627	-24.1526	-24.1107	-24.1548	-24.247	-24.0604	-23.9637	-24.0675	-24.0383	-24.0542	-24.2588	-24.2452	-24.0924	-24.1963	-24.1551	-24.1298	-23.947	-23.9401	-23.9065	-23.6069
	-104.917	-24.6657	-104.917	-24.6657	-101.05	-16.9416	-76.1425	-13.3535	-76.1425	-13.3535	-75.3932	-13.9131									NaN	NaN					Section 36	-99.1848	-99.231	-99.0988	-99.1256	-99.0457	-98.9863	-98.8668	-98.9073	-98.85	-98.8288	-98.771	-98.7275	-98.5792	-98.583	-98.5607	-98.5421	-98.516	-98.5531	-98.4706	-98.5112	-98.5853	-98.5296
	-104.888	-24.5521	-104.888	-24.5521	-100.984	-17.0316	-76.1757	-13.317	-76.1757	-13.317	-75.3938	-13.9293									NaN	NaN					Section 37	-71.859	-71.955	-71.9121	-71.9318	-71.8521	-71.8277	-71.9213	-71.9071	-71.919	-72.1781	-72.0761	-71.9959	-72.1852	-72.1121	-72.1105	-72.1325	-72.0759	-72.0228	-71.9426	-71.9643	-71.9623	-71.8532
	-104.867	-24.4022	-104.867	-24.4022	-100.941	-17.1338	-76.1615	-13.3447	-76.1615	-13.3447	-75.3945	-13.9456									NaN	NaN
	-104.794	-24.3819	-104.794	-24.3819	-100.991	-17.1441	-76.1646	-13.315	-76.1646	-13.315	-75.3659	-13.9844									NaN	NaN					Y(cm)
	-104.705	-24.3358	-104.705	-24.3358	-100.866	-16.9495	-76.1637	-13.2853	-76.1637	-13.2853	-75.3818	-14.0055									NaN	NaN					Section 1	-18.4076	-18.5395	-18.6685	-18.7282	-19.0493	-19.142	-19.4539	-19.6265	-19.5074	-19.8698	-20.0573	-20.2576	-20.1203	-20.3527	-20.4521	-20.7184	-20.5916	-20.7725	-20.9512	-20.9542	-21.0522	-21.0635
	-104.732	-24.2747	-104.732	-24.2747	-100.755	-17.0697	-76.1637	-13.2853	-76.1637	-13.2853	-75.3805	-13.9731									NaN	NaN					Section 2	55.637	56.0856	55.6327	55.7125	55.7146	55.6004	55.8701	55.4421	55.5422	55.4777	55.2979	54.7298	54.9221	54.981	55.1565	54.611	54.6322	54.6097	54.4307	54.4176	54.4746	54.3771
	-104.78	-24.0574	-104.78	-24.0574	-100.655	-17.215	-76.1637	-13.2853	-76.1637	-13.2853	-75.3805	-13.9731									NaN	NaN					Section 3	-23.0137	-23.1524	-23.2036	-23.2369	-23.169	-23.1232	-23.2762	-23.3684	-23.3869	-23.6549	-23.6786	-23.6923	-23.6899	-23.5607	-23.6748	-23.6663	-23.5954	-23.6884	-23.6232	-23.6728	-23.6173	-23.4601
	-104.756	-24.0261	-104.756	-24.0261	-100.576	-17.1128	-76.1637	-13.2853	-76.1637	-13.2853	-75.3805	-13.9731									NaN	NaN					Section 4	11.6421	11.7078	11.7267	11.9121	11.8438	11.8264	11.7609	11.8138	11.7977	11.8285	12.1082	12.0641	12.1212	11.6432	11.8489	11.7205	11.7082	11.7721	11.9014	11.8401	11.8095	11.838
	-104.676	-23.9368	-104.676	-23.9368	-100.507	-17.2413	-76.1637	-13.2853	-76.1637	-13.2853	-75.3799	-13.9569									NaN	NaN					Section 5	-0.165569	-0.0808113	0.123534	0.241167	0.172187	0.239546	0.309772	0.792057	0.91964	0.906892	1.19783	1.05808	1.49169	1.53359	1.71075	1.93894	2.05195	2.09027	2.41131	2.65896	2.56204	2.87504
	-104.707	-23.8467	-104.707	-23.8467	-100.244	-17.298	-76.1614	-13.224	-76.1614	-13.224	-75.3934	-13.9711									NaN	NaN					Section 6	45.0269	44.8271	44.9307	44.8121	44.815	44.5928	44.5878	44.3984	44.4367	44.5009	44.554	44.4743	44.418	44.3225	44.287	44.3273	44.2514	44.2124	44.341	44.4553	44.2176	44.3397
	-104.816	-23.7027	-104.816	-23.7027	-100.246	-17.4071	-76.1637	-13.2853	-76.1637	-13.2853	-75.3934	-13.9711									NaN	NaN					Section 7	-25.1422	-25.1665	-24.901	-24.9263	-24.8978	-24.9973	-24.8597	-24.8304	-24.8221	-24.8199	-25.0427	-24.7595	-24.9413	-24.7741	-24.7473	-24.6415	-24.621	-24.8401	-24.8349	-24.4255	-24.7116	-24.1764
	-104.641	-23.6612	-104.641	-23.6612	-99.94	-17.5282	-76.183	-13.2883	-76.183	-13.2883	-75.4358	-13.9687									NaN	NaN					Section 8	-23.0487	-22.9159	-23.2494	-22.7972	-22.943	-22.9256	-22.704	-22.5176	-22.4597	-22.3716	-22.1771	-22.357	-22.2466	-22.1103	-21.8462	-21.8085	-21.7038	-21.7615	-21.6209	-21.5203	-21.5602	-21.3148
	-104.753	-23.5649	-104.753	-23.5649	-99.9965	-17.3969	-76.1808	-13.227	-76.1808	-13.227	-75.4358	-13.9687									NaN	NaN					Section 9	7.74963	7.98318	7.96219	8.09656	8.06261	8.02565	8.18399	8.14203	8.17879	8.31738	8.31127	8.23251	8.27206	8.42159	8.40881	8.51068	8.43467	8.32534	8.57427	8.61573	8.65613	8.91719
	-104.755	-23.5896	-104.755	-23.5896	-99.7816	-17.6116	-76.183	-13.2883	-76.183	-13.2883	-75.4371	-14.001									NaN	NaN					Section 10	-10.7648	-10.7517	-10.7776	-10.8114	-10.89	-10.8977	-10.9502	-11.0307	-10.8078	-10.8981	-10.9596	-11.0018	-10.9936	-10.9396	-10.8997	-10.8618	-10.8311	-10.8397	-10.8179	-11.0381	-11.0274	-11.0504
	-104.782	-23.433	-104.782	-23.433	-99.7656	-17.5278	-76.183	-13.2883	-76.183	-13.2883	-75.4371	-14.001									NaN	NaN					Section 11	-25.5782	-25.3357	-25.45	-25.3606	-25.3141	-25.1628	-25.2248	-25.2226	-25.2987	-25.232	-25.2837	-25.1863	-25.2219	-25.2204	-25.2201	-25.1362	-25.1904	-25.2132	-25.2682	-25.0885	-25.1078	-24.846
	-104.79	-23.4502	-104.79	-23.4502	-99.4664	-17.6786	-76.183	-13.2883	-76.183	-13.2883	-75.4371	-14.001									NaN	NaN					Section 12	59.6283	59.4287	59.4633	59.9061	59.9056	60.0823	59.9566	59.9567	59.9672	59.7801	59.9364	59.9398	59.9764	59.9475	59.9264	60.0138	60.2778	60.2375	60.0743	60.0677	60.0193	60.0015
	-104.802	-23.3616	-104.802	-23.3616	-99.3919	-17.5707	-76.183	-13.2883	-76.183	-13.2883	-75.4364	-13.9848									NaN	NaN					Section 13	4.03016	4.06686	4.05158	4.02489	3.9915	4.11341	4.09189	4.04836	3.8801	3.90337	4.19321	4.03472	3.97148	4.08263	3.9568	4.18971	4.03089	4.02472	3.97536	3.96918	3.97706	4.15855
	-104.722	-23.2501	-104.722	-23.2501	-99.281	-17.5082	-76.183	-13.2883	-76.183	-13.2883	-75.4364	-13.9848									NaN	NaN					Section 14	15.1768	15.1857	15.3008	15.0961	15.3099	15.2556	15.2515	15.2572	15.2255	15.2129	15.1958	15.1814	15.3211	15.3868	15.3251	15.4372	15.2748	15.2484	15.2614	15.3284	15.4733	15.4537
	-104.692	-23.3566	-104.692	-23.3566	-99.1372	-17.539	-76.1884	-13.3197	-76.1884	-13.3197	-75.4364	-13.9848									NaN	NaN					Section 15	-23.5414	-23.4118	-23.4157	-23.3676	-23.1961	-23.474	-23.2577	-23.4452	-23.4152	-23.4472	-23.4202	-23.3412	-23.4734	-23.3681	-23.3144	-23.1617	-23.2094	-23.1642	-23.2595	-23.3423	-23.0656	-23.1965
	-104.742	-23.3069	-104.742	-23.3069	-98.9107	-17.5756	-76.1861	-13.2586	-76.1861	-13.2586	-75.4364	-13.9848									NaN	NaN					Section 16	-21.2306	-21.1033	-21.0475	-21.1064	-21.0868	-21.0853	-20.7454	-20.7586	-20.9024	-20.7305	-20.6728	-20.551	-20.6675	-20.508	-20.3466	-20.4747	-20.3684	-20.487	-20.3549	-20.4621	-20.5529	-20.5243
	-104.905	-23.3203	-104.905	-23.3203	-98.7394	-17.5646	-76.1861	-13.2586	-76.1861	-13.2586	-75.4364	-13.9848									NaN	NaN					Section 17	21.7232	21.8799	21.8771	22.1041	22.2011	22.4354	22.2858	22.4407	22.5232	22.7001	22.7556	22.6946	22.8527	23.0386	23.0382	23.1117	23.1327	23.3985	23.3548	23.5447	23.6163	23.9229
	-104.829	-23.1975	-104.829	-23.1975	-98.5528	-17.6143	-76.1861	-13.2586	-76.1861	-13.2586	-75.3391	-14.0341									NaN	NaN					Section 18	-25.5567	-25.5779	-25.5445	-25.6741	-25.7783	-25.7237	-25.9935	-26.0042	-26.0054	-25.946	-25.8019	-25.8057	-25.8007	-25.833	-25.9351	-25.7969	-25.7322	-25.9257	-25.8551	-25.9593	-25.8634	-25.7596
	-104.893	-23.2283	-104.893	-23.2283	-98.5076	-17.5452	-76.1881	-13.249	-76.1881	-13.249	-75.3391	-14.0341									NaN	NaN					Section 19	-27.7224	-27.5438	-27.5558	-27.5694	-27.4667	-27.5183	-27.6591	-27.6048	-27.598	-27.5974	-27.5146	-27.3075	-27.2876	-27.1508	-26.9769	-26.9032	-26.8533	-26.9296	-26.6116	-26.5026	-26.3368	-26.2578
	-104.848	-23.1991	-104.848	-23.1991	-98.4016	-17.6113	-76.1881	-13.249	-76.1881	-13.249	-75.3391	-14.0341									NaN	NaN					Section 20	-14.9797	-14.8493	-14.6113	-14.7811	-14.6125	-14.495	-14.4568	-14.4952	-14.2141	-14.0588	-14.0159	-13.9429	-13.8625	-13.8129	-13.6376	-13.485	-13.3431	-13.2139	-13.1623	-13.0967	-12.9466	-12.9415
	-105.101	-23.1086	-105.101	-23.1086	-98.0382	-17.5096	-76.1595	-13.335	-76.1595	-13.335	-75.3384	-14.0179									NaN	NaN					Section 21	11.7014	11.7311	11.6749	11.6152	11.5209	11.5851	11.5667	11.5617	11.5702	11.5432	11.5331	11.5184	11.5004	11.5082	11.4682	11.5571	11.6273	11.5367	11.4551	11.3596	11.4734	11.3441
	-105.123	-23.2343	-105.123	-23.2343	-97.8126	-17.3327	-76.1595	-13.335	-76.1595	-13.335	-75.3384	-14.0179									NaN	NaN					Section 22	57.3864	57.4608	57.4827	57.4705	57.8308	57.688	57.5975	57.4528	57.8199	57.9396	57.9371	57.9203	58.049	57.8967	58.1176	58.3576	58.3713	58.37	58.7794	59.1184	58.9786	59.1256
	-105.21	-23.0039	-105.21	-23.0039	-97.7792	-17.4302	-76.1593	-13.3234	-76.1593	-13.3234	-75.3384	-14.0179									NaN	NaN					Section 23	23.1432	23.1314	23.5052	23.6467	24	24.0266	24.3268	24.4204	24.4392	24.736	25.056	25.1213	25.3802	25.5532	25.6998	25.8462	26.0846	26.2183	26.2501	26.6262	26.6371	26.9105
	-105.248	-23.0453	-105.248	-23.0453	-97.5338	-17.4117	-76.1616	-13.3845	-76.1616	-13.3845	-75.388	-13.9887									NaN	NaN					Section 24	3.05271	2.98188	2.99567	3.01616	2.70244	2.93982	2.95137	2.99065	3.07307	3.04799	2.89338	2.80995	2.82733	2.70859	2.80814	2.84599	2.49651	2.59318	2.55608	2.46794	2.43581	2.42501
	-105.235	-23.0338	-105.235	-23.0338	-97.2411	-17.3071	-76.1593	-13.3234	-76.1593	-13.3234	-75.388	-13.9887									NaN	NaN					Section 25	10.8012	10.8009	10.8563	10.9382	10.62	10.7494	10.4501	10.5443	10.3147	10.3214	10.2281	10.24	10.1088	10.0698	10.026	9.9806	9.94872	9.81359	9.88679	9.6983	9.71709	9.69899
	-105.239	-22.8862	-105.239	-22.8862	-97.0525	-17.2511	-76.1593	-13.3234	-76.1593	-13.3234	-75.388	-13.9887									NaN	NaN					Section 26	-20.5742	-20.5415	-20.6317	-20.4613	-20.5197	-20.6306	-20.5366	-20.5358	-20.5915	-20.5289	-20.4954	-20.4147	-20.4418	-20.5253	-20.5058	-20.4258	-20.4227	-20.3342	-20.332	-20.2888	-20.2728	-20.2739
	-105.284	-22.8386	-105.284	-22.8386	-96.7476	-17.1215	-76.2003	-13.3905	-76.2003	-13.3905	-75.3846	-14.0184									NaN	NaN					Section 27	55.1272	54.9071	54.8534	54.7751	54.8713	54.8604	55.0992	55.0507	55.0605	54.9498	54.8953	54.9205	54.9711	55.2425	55.1088	55.1232	55.0365	55.1497	55.0205	55.049	55.1431	55.1871
	-105.258	-22.8448	-105.258	-22.8448	-96.5375	-17.144	-76.1949	-13.359	-76.1949	-13.359	-75.3846	-14.0184									NaN	NaN					Section 28	-14.8313	-14.8017	-14.8784	-14.9231	-14.885	-14.7988	-14.6639	-14.5408	-14.5607	-14.3184	-14.2118	-13.9	-13.8938	-13.6928	-13.5128	-13.5087	-13.3502	-13.2695	-13.141	-12.8458	-12.689	-12.5386
	-105.264	-22.7485	-105.264	-22.7485	-96.4501	-17.1148	-76.1949	-13.359	-76.1949	-13.359	-75.3846	-14.0184									NaN	NaN					Section 29	12.0475	11.9513	11.8852	11.7051	11.6045	11.5069	11.3356	11.0073	10.9378	10.8444	10.6824	10.5579	10.407	10.1925	10.1289	9.94472	9.61539	9.73008	9.68937	9.61067	9.36725	9.20791
	-105.515	-22.6426	-105.515	-22.6426	-96.0921	-16.9809	-76.1949	-13.359	-76.1949	-13.359	-75.388	-13.9887									NaN	NaN					Section 30	-11.6774	-11.8323	-12.0246	-12.0778	-12.0292	-12.2349	-12.2443	-12.111	-11.9963	-12.0886	-12.1046	-12.043	-11.82	-11.717	-11.7194	-11.3577	-11.3745	-11.3297	-11.1258	-11.0621	-10.9091	-10.6306
	-105.41	-22.5436	-105.41	-22.5436	-95.9582	-16.7948	-76.1949	-13.359	-76.1949	-13.359	-75.3379	-13.9656									NaN	NaN					Section 31	57.9898	58.0473	57.8469	57.7847	57.6683	57.6592	57.8996	57.8166	57.8436	57.8386	57.656	57.8704	57.9388	57.936	57.7781	57.8019	57.8244	57.8235	57.5705	57.6537	57.7704	57.7154
	-105.477	-22.5311	-105.477	-22.5311	-95.7909	-16.7226	-76.1949	-13.359	-76.1949	-13.359	-75.4037	-13.9683									NaN	NaN					Section 32	-6.6372	-6.32218	-6.25933	-5.93185	-5.77604	-5.67646	-5.4945	-5.20135	-5.31326	-5.28342	-5.19569	-5.20913	-4.87354	-4.80705	-4.64953	-4.55899	-4.4499	-4.39754	-4.19062	-4.08911	-4.0306	-3.8547
	-105.563	-22.4624	-105.563	-22.4624	-95.7522	-16.754	-76.1949	-13.359	-76.1949	-13.359	-75.4037	-13.9683									NaN	NaN					Section 33	-19.6813	-19.7247	-19.6799	-19.5936	-19.5442	-19.5267	-19.4961	-19.3503	-19.235	-19.2286	-19.121	-19.037	-18.931	-18.8774	-18.7616	-18.7356	-18.8304	-18.4729	-18.4378	-18.2737	-18.2922	-18.2202
	-105.583	-22.3334	-105.583	-22.3334	-95.5355	-16.6555	-76.1742	-13.4255	-76.1742	-13.4255	-75.4037	-13.9683									NaN	NaN					Section 34	-11.6433	-11.5309	-11.4692	-11.1716	-11.0926	-11.1861	-11.0163	-10.9633	-10.7581	-10.6985	-10.6869	-10.7097	-10.5279	-10.5267	-10.5361	-10.3553	-10.3226	-10.3978	-10.4402	-10.1763	-10.2048	-10.0672
	-105.592	-22.2953	-105.592	-22.2953	-95.3028	-16.6695	-76.1719	-13.3643	-76.1719	-13.3643	-75.4037	-13.9683									NaN	NaN					Section 35	13.8677	13.8063	13.9248	13.7354	13.7481	13.7659	13.7117	13.8725	13.9519	14.0066	13.7295	13.777	13.6812	13.6456	13.5611	13.5491	13.5392	13.6051	13.5016	13.4067	13.4511	13.6521
	-105.532	-21.8847	-105.532	-21.8847	-95.1426	-16.5602	-76.1719	-13.3643	-76.1719	-13.3643	-75.4037	-13.9683									NaN	NaN					Section 36	-15.3716	-15.2951	-15.3532	-15.2459	-15.2543	-15.1204	-15.3725	-15.3017	-14.9929	-14.9179	-14.8395	-14.8257	-14.5984	-14.5966	-14.4966	-14.4777	-14.2501	-14.2882	-14.138	-14.0537	-13.965	-14.1218
	-105.546	-21.8859	-105.546	-21.8859	-95.0582	-16.6397	-76.1699	-13.3739	-76.1699	-13.3739	-75.4037	-13.9683									NaN	NaN					Section 37	60.9111	60.8102	60.8253	60.7148	60.7694	60.7905	60.7445	60.5993	60.59	60.3869	60.5605	60.4536	60.5167	60.4961	60.5349	60.5041	60.5474	60.625	60.6891	60.6881	60.6821	60.817
	-105.416	-21.8386	-105.416	-21.8386	-94.8393	-16.6988	-76.1722	-13.4351	-76.1722	-13.4351	-75.3843	-13.9655									NaN	NaN
	-105.476	-21.6486	-105.476	-21.6486	-94.8207	-16.5837	-76.1699	-13.3739	-76.1699	-13.3739	-75.3843	-13.9655									NaN	NaN
	-105.669	-21.5361	-105.669	-21.5361	-94.6311	-16.586	-76.1722	-13.4351	-76.1722	-13.4351	-75.3843	-13.9655									NaN	NaN
	-105.513	-21.5303	-105.513	-21.5303	-94.3309	-16.6026	-76.2367	-13.2968	-76.2367	-13.2968	-75.3843	-13.9655									NaN	NaN
	-105.551	-21.3823	-105.551	-21.3823	-94.2093	-16.5986	-76.2033	-13.3224	-76.2033	-13.3224	-75.3843	-13.9655									NaN	NaN
	-105.496	-21.3359	-105.496	-21.3359	-94.0943	-16.678	-76.1803	-13.3277	-76.1803	-13.3277	-75.3843	-13.9655									NaN	NaN
	-105.453	-21.2125	-105.453	-21.2125	-94.108	-16.7123	-76.1803	-13.3277	-76.1803	-13.3277	-75.3508	-14.0384									NaN	NaN
	-105.514	-20.9495	-105.514	-20.9495	-93.9125	-16.6254	-76.1803	-13.3277	-76.1803	-13.3277	-75.3522	-14.0789									NaN	NaN
	-105.342	-21.0248	-105.342	-21.0248	-93.8364	-16.6251	-76.1803	-13.3277	-76.1803	-13.3277	-75.3685	-14.0617									NaN	NaN
	-105.359	-20.8184	-105.359	-20.8184	-93.6493	-16.6829	-76.1803	-13.3277	-76.1803	-13.3277	-75.3753	-14.0022									NaN	NaN
	-105.253	-20.702	-105.253	-20.702	-93.6384	-16.748	-76.1803	-13.3277	-76.1803	-13.3277	-75.3892	-14.0146									NaN	NaN
	-105.308	-20.4009	-105.308	-20.4009	-93.5534	-16.7082	-76.1803	-13.3277	-76.1803	-13.3277	-75.3698	-14.0118									NaN	NaN
	-105.296	-20.2094	-105.296	-20.2094	-93.6062	-16.7322	-76.1803	-13.3277	-76.1803	-13.3277	-75.3681	-14.0211									NaN	NaN
	-105.255	-20.1619	-105.255	-20.1619	-93.509	-16.7924	-76.1948	-13.3136	-76.1948	-13.3136	-75.3681	-14.0211									NaN	NaN
	-105.267	-19.9614	-105.267	-19.9614	-93.4951	-16.8342	-76.1948	-13.3136	-76.1948	-13.3136	-75.3681	-14.0211									NaN	NaN
	-105.374	-19.8613	-105.374	-19.8613	-93.3043	-16.9885	-76.1948	-13.3136	-76.1948	-13.3136	-75.3681	-14.0211									NaN	NaN
	-105.365	-19.9414	-105.365	-19.9414	-93.329	-16.8749	-76.1948	-13.3136	-76.1948	-13.3136	-75.3681	-14.0211									NaN	NaN
	-105.343	-19.6607	-105.343	-19.6607	-93.3407	-16.7363	-76.1968	-13.304	-76.1968	-13.304	-75.3664	-14.0305									NaN	NaN
	-105.418	-19.5171	-105.418	-19.5171	-93.0166	-16.5689	-76.1962	-13.2878	-76.1962	-13.2878	-75.3336	-14.0563									NaN	NaN
	-105.337	-19.364	-105.337	-19.364	-93.141	-16.6428	-76.1968	-13.304	-76.1968	-13.304	-75.3119	-14.0813									NaN	NaN
	-105.288	-19.2755	-105.288	-19.2755	-93.0498	-16.6162	-76.1968	-13.304	-76.1968	-13.304	-75.1066	-14.2335									NaN	NaN
	-105.129	-19.1074	-105.129	-19.1074	-92.9836	-16.4753	-76.1758	-13.2996	-76.1758	-13.2996	-75.1021	-14.1842									NaN	NaN
	-105.162	-19.1745	-105.162	-19.1745	-92.838	-16.3626	-76.1764	-13.3158	-76.1764	-13.3158	-75.0269	-14.2451									NaN	NaN
	-104.937	-18.9935	-104.937	-18.9935	-92.7973	-16.3213	-76.2164	-13.334	-76.2164	-13.334	-74.8429	-14.3296									NaN	NaN
	-104.88	-18.8983	-104.88	-18.8983	-92.6185	-16.2268	-76.2184	-13.3245	-76.2184	-13.3245	-74.8321	-14.3908									NaN	NaN
	-104.991	-18.6025	-104.991	-18.6025	-92.5097	-16.0715	-76.2184	-13.3245	-76.2184	-13.3245	-74.7238	-14.3479									NaN	NaN
	-104.69	-18.6346			-92.4249	-16.0257	-76.2184	-13.3245			-74.521	-14.4247									NaN	NaN
	-104.534	-18.5732			-92.1504	-16.1562	-76.2184	-13.3245			-74.5451	-14.4691									NaN	NaN
	-104.433	-18.5322			-91.701	-16.0168	-76.2184	-13.3245			-74.469	-14.5367									NaN	NaN
	-104.412	-18.4558			-91.6706	-16.0214	-76.2178	-13.3083			-74.398	-14.5748									NaN	NaN
	-104.091	-18.3742			-91.7503	-16.1463	-76.2178	-13.3083			-74.3004	-14.5941									NaN	NaN
	-104.026	-18.2071			-91.3733	-15.8733	-76.2178	-13.3083			-74.3029	-14.6552									NaN	NaN
	-103.874	-18.1705			-91.3719	-16.0415	-76.2178	-13.3083			-74.2698	-14.6589									NaN	NaN
	-103.679	-18.0131			-91.1684	-15.9226	-76.2031	-13.3198			-74.204	-14.82									NaN	NaN
	-103.635	-17.8441			-90.9719	-15.9859	-76.243	-13.3581			-74.1287	-14.7967									NaN	NaN
	-103.375	-17.8412			-90.7859	-16.0461	-76.243	-13.3581			-74.067	-14.9076									NaN	NaN
	-103.472	-17.7664			-90.7817	-15.9861	-76.2399	-13.3878			-74.023	-14.9193									NaN	NaN
	-103.27	-17.7866			-90.2905	-16.0601	-76.2393	-13.3716			-73.9706	-14.9309									NaN	NaN
	-103.099	-17.6254			-90.4129	-16.0406	-76.2059	-13.3626			-73.8443	-14.9886									NaN	NaN
	-103.092	-17.3345			-90.1658	-15.9915	-76.1598	-13.3484			-73.7736	-15.0305									NaN	NaN
	-102.871	-17.352			-90.1537	-16.2654	-76.1598	-13.3484			-73.7576	-15.1641									NaN	NaN
	-102.74	-17.3616			-89.8831	-16.26	-76.1141	-13.3912			-73.7041	-15.1793									NaN	NaN
	-102.667	-17.3217			-89.6002	-16.1078	-76.0285	-13.4281			-73.7041	-15.1793									NaN	NaN
	-102.686	-17.337			-89.5185	-16.2525	-75.9858	-13.5062			-73.7041	-15.1793									NaN	NaN
	-102.525	-17.1298			-89.2393	-16.2971	-75.9858	-13.5062			-73.6713	-15.2052									NaN	NaN
	-102.598	-17.1889			-89.0606	-16.0287	-75.9194	-13.5493			-73.6713	-15.2052									NaN	NaN
	-102.448	-16.9925			-88.8967	-15.9116	-75.8782	-13.5691			-73.7594	-15.175									NaN	NaN
	-102.266	-17.1873			-88.6196	-16.005	-75.7585	-13.6153			-73.7861	-15.1465									NaN	NaN
	-102.24	-17.1695			-88.6083	-16.0235	-75.6857	-13.6621			-73.7102	-15.1246									NaN	NaN
	-101.887	-17.2858			-88.3811	-15.8856	-75.623	-13.6947			-73.7667	-15.1439									NaN	NaN
	-102.037	-17.1049			-88.2863	-15.9597	-75.6552	-13.7598			-73.6432	-15.1972									NaN	NaN
	-101.692	-17.1568			-88.1929	-15.947	-75.5608	-13.7951			-73.5634	-15.2051									NaN	NaN
	-101.644	-17.2344			-87.8561	-16.1021	-75.5478	-13.8209			-73.402	-15.3086									NaN	NaN
	-101.478	-17.2668			-87.7707	-15.863	-75.521	-13.8343			-73.4723	-15.3112									NaN	NaN
	-101.325	-17.2036			-87.6997	-16.0393	-75.521	-13.8343			-73.5024	-15.3069									NaN	NaN
	-101.317	-17.1881			-87.6225	-16.0023	-75.4823	-13.8286			-73.5035	-15.2981									NaN	NaN
	-101.26	-17.157			-87.4063	-16.1893	-75.4823	-13.8286			-73.5599	-15.3173									NaN	NaN
	-101.075	-17.1761			-87.1402	-16.0917	-75.4823	-13.8286			-73.5075	-15.2682									NaN	NaN
	-101.035	-17.0172			-87.0495	-16.1968	-75.4409	-13.8688			-73.4145	-15.2891									NaN	NaN
	-101.138	-17.0691			-86.8836	-16.0372	-75.4304	-13.9046			-73.4156	-15.2803									NaN	NaN
	-101.05	-16.9416			-86.8179	-15.8493	-75.3932	-13.9131			-73.4592	-15.2909									NaN	NaN
	-100.984	-17.0316			-86.4117	-15.9715	-75.3938	-13.9293			-73.4592	-15.2909									NaN	NaN
	-100.941	-17.1338			-86.3989	-16.0956	-75.3945	-13.9456			-73.4592	-15.2909									NaN	NaN
	-100.991	-17.1441			-86.0972	-16.0315	-75.3659	-13.9844			-73.4592	-15.2909									NaN	NaN
	-100.866	-16.9495			-85.9085	-15.9536	-75.3818	-14.0055			-73.4592	-15.2909									NaN	NaN
	-100.755	-17.0697			-85.7606	-15.9017	-75.3805	-13.9731			-73.4592	-15.2909									NaN	NaN
	-100.655	-17.215			-85.5235	-15.9087	-75.3805	-13.9731			-73.4836	-15.2767									NaN	NaN
	-100.576	-17.1128			-85.4041	-15.7764	-75.3805	-13.9731			-73.4703	-15.2954									NaN	NaN
	-100.507	-17.2413			-85.3024	-15.6451	-75.3799	-13.9569			-73.5169	-15.2848									NaN	NaN
	-100.244	-17.298			-85.0649	-15.7093	-75.3934	-13.9711			-73.5169	-15.2848									NaN	NaN
	-100.246	-17.4071			-84.8144	-15.7368	-75.3934	-13.9711			-73.5169	-15.2848									NaN	NaN
	-99.94	-17.5282			-84.908	-15.7591	-75.4358	-13.9687			-73.5169	-15.2848									NaN	NaN
	-99.9965	-17.3969			-84.6228	-15.7384	-75.4358	-13.9687			-73.4486	-15.3204									NaN	NaN
	-99.7816	-17.6116			-84.219	-15.6518	-75.4371	-14.001			-73.3561	-15.3573									NaN	NaN
	-99.7656	-17.5278			-83.9224	-15.6821	-75.4371	-14.001			-73.3306	-15.4238									NaN	NaN
	-99.4664	-17.6786			-83.7557	-15.6202	-75.4371	-14.001			-73.2525	-15.4176									NaN	NaN
	-99.3919	-17.5707			-83.5889	-15.7779	-75.4364	-13.9848			-73.1718	-15.446									NaN	NaN
	-99.281	-17.5082			-83.5515	-15.6624	-75.4364	-13.9848			-73.0526	-15.5518									NaN	NaN
	-99.1372	-17.539			-83.2943	-15.6529	-75.4364	-13.9848			-72.8951	-15.6619									NaN	NaN
	-98.9107	-17.5756			-82.9769	-15.7327	-75.4364	-13.9848			-72.7399	-15.7497									NaN	NaN
	-98.7394	-17.5646			-82.6331	-15.709	-75.4364	-13.9848			-72.6278	-15.8597									NaN	NaN
	-98.5528	-17.6143			-82.5255	-15.7707	-75.3391	-14.0341			-72.381	-15.9877									NaN	NaN
	-98.5076	-17.5452			-82.1624	-15.8068	-75.3391	-14.0341			-72.32	-16.1203									NaN	NaN
	-98.4016	-17.6113			-81.8155	-15.8047	-75.3391	-14.0341			-72.1491	-16.1465									NaN	NaN
	-98.0382	-17.5096			-81.6031	-15.8471	-75.3384	-14.0179			-72.1302	-16.2331									NaN	NaN
	-97.8126	-17.3327			-81.3707	-15.8489	-75.3384	-14.0179			-72.1203	-16.3102									NaN	NaN
	-97.7792	-17.4302			-81.035	-15.7961	-75.3384	-14.0179			-72.0899	-16.3203									NaN	NaN
	-97.5338	-17.4117			-81.1038	-15.8072	-75.388	-13.9887			-72.0665	-16.3257									NaN	NaN
	-97.2411	-17.3071			-80.822	-15.788	-75.388	-13.9887			-72.0407	-16.3467									NaN	NaN
	-97.0525	-17.2511			-80.4772	-15.816	-75.388	-13.9887			-71.9486	-16.4031									NaN	NaN
	-96.7476	-17.1215			-80.2872	-15.8925	-75.3846	-14.0184			-71.8409	-16.4063									NaN	NaN
	-96.5375	-17.144			-80.0833	-15.9028	-75.3846	-14.0184			-71.7463	-16.5202									NaN	NaN
	-96.4501	-17.1148			-79.9095	-15.9066	-75.3846	-14.0184			-71.6807	-16.5589									NaN	NaN
	-96.0921	-16.9809			-79.532	-15.7168	-75.388	-13.9887			-71.6255	-16.5386									NaN	NaN
	-95.9582	-16.7948			-79.4005	-15.7237	-75.3379	-13.9656			-71.6807	-16.5589									NaN	NaN
	-95.7909	-16.7226			-79.0491	-15.722	-75.4037	-13.9683			-71.6733	-16.5271									NaN	NaN
	-95.7522	-16.754			-78.8236	-15.6658	-75.4037	-13.9683			-71.6762	-16.589									NaN	NaN
	-95.5355	-16.6555			-78.5272	-15.473	-75.4037	-13.9683			-71.6733	-16.5271									NaN	NaN
	-95.3028	-16.6695			-78.3905	-15.6535	-75.4037	-13.9683			-71.5885	-16.5295									NaN	NaN
	-95.1426	-16.5602			-78.0878	-15.5363	-75.4037	-13.9683			-71.5362	-16.571									NaN	NaN
	-95.0582	-16.6397			-77.6693	-15.7269	-75.4037	-13.9683			-71.5362	-16.571									NaN	NaN
	-94.8393	-16.6988			-77.6518	-15.6869	-75.3843	-13.9655			-71.5914	-16.5914									NaN	NaN
	-94.8207	-16.5837			-77.4745	-15.6538	-75.3843	-13.9655			-71.5323	-16.5786									NaN	NaN
	-94.6311	-16.586			-77.2251	-15.8012	-75.3843	-13.9655			-71.5128	-16.5763									NaN	NaN
	-94.3309	-16.6026			-77.057	-15.7332	-75.3843	-13.9655			-71.5128	-16.5763									NaN	NaN
	-94.2093	-16.5986			-76.7469	-15.8314	-75.3843	-13.9655			-71.5128	-16.5763									NaN	NaN
	-94.0943	-16.678			-76.6432	-15.976	-75.3843	-13.9655			-71.5017	-16.5772									NaN	NaN
	-94.108	-16.7123			-76.3847	-15.9586	-75.3508	-14.0384			-71.5017	-16.5772									NaN	NaN
	-93.9125	-16.6254					-75.3522	-14.0789													NaN	NaN
	-93.8364	-16.6251					-75.3685	-14.0617													NaN	NaN
	-93.6493	-16.6829					-75.3753	-14.0022													NaN	NaN
	-93.6384	-16.748					-75.3892	-14.0146													NaN	NaN
	-93.5534	-16.7082					-75.3698	-14.0118													NaN	NaN
	-93.6062	-16.7322					-75.3681	-14.0211													NaN	NaN
	-93.509	-16.7924					-75.3681	-14.0211													NaN	NaN
	-93.4951	-16.8342					-75.3681	-14.0211													NaN	NaN
	-93.3043	-16.9885					-75.3681	-14.0211													NaN	NaN
	-93.329	-16.8749					-75.3681	-14.0211													NaN	NaN
	-93.3407	-16.7363					-75.3664	-14.0305													NaN	NaN
	-93.0166	-16.5689					-75.3336	-14.0563													NaN	NaN
	-93.141	-16.6428					-75.3119	-14.0813													NaN	NaN
	-93.0498	-16.6162					-75.1066	-14.2335													NaN	NaN
	-92.9836	-16.4753					-75.1021	-14.1842													NaN	NaN
	-92.838	-16.3626					-75.0269	-14.2451													NaN	NaN
	-92.7973	-16.3213					-74.8429	-14.3296													NaN	NaN
	-92.6185	-16.2268					-74.8321	-14.3908													NaN	NaN
	-92.5097	-16.0715					-74.7238	-14.3479													NaN	NaN
	-92.4249	-16.0257					-74.521	-14.4247													NaN	NaN
	-92.1504	-16.1562					-74.5451	-14.4691													NaN	NaN
	-91.701	-16.0168					-74.469	-14.5367													NaN	NaN
	-91.6706	-16.0214					-74.398	-14.5748													NaN	NaN
	-91.7503	-16.1463					-74.3004	-14.5941													NaN	NaN
	-91.3733	-15.8733					-74.3029	-14.6552													NaN	NaN
	-91.3719	-16.0415					-74.2698	-14.6589													NaN	NaN
	-91.1684	-15.9226					-74.204	-14.82													NaN	NaN
	-90.9719	-15.9859					-74.1287	-14.7967													NaN	NaN
	-90.7859	-16.0461					-74.067	-14.9076													NaN	NaN
	-90.7817	-15.9861					-74.023	-14.9193													NaN	NaN
	-90.2905	-16.0601					-73.9706	-14.9309													NaN	NaN
	-90.4129	-16.0406					-73.8443	-14.9886													NaN	NaN
	-90.1658	-15.9915					-73.7736	-15.0305													NaN	NaN
	-90.1537	-16.2654					-73.7576	-15.1641													NaN	NaN
	-89.8831	-16.26					-73.7041	-15.1793													NaN	NaN
	-89.6002	-16.1078					-73.7041	-15.1793													NaN	NaN
	-89.5185	-16.2525					-73.7041	-15.1793													NaN	NaN
	-89.2393	-16.2971					-73.6713	-15.2052													NaN	NaN
	-89.0606	-16.0287					-73.6713	-15.2052													NaN	NaN
	-88.8967	-15.9116					-73.7594	-15.175													NaN	NaN
	-88.6196	-16.005					-73.7861	-15.1465													NaN	NaN
	-88.6083	-16.0235					-73.7102	-15.1246													NaN	NaN
	-88.3811	-15.8856					-73.7667	-15.1439													NaN	NaN
	-88.2863	-15.9597					-73.6432	-15.1972													NaN	NaN
	-88.1929	-15.947					-73.5634	-15.2051													NaN	NaN
	-87.8561	-16.1021					-73.402	-15.3086													NaN	NaN
	-87.7707	-15.863					-73.4723	-15.3112													NaN	NaN
	-87.6997	-16.0393					-73.5024	-15.3069													NaN	NaN
	-87.6225	-16.0023					-73.5035	-15.2981													NaN	NaN
	-87.4063	-16.1893					-73.5599	-15.3173													NaN	NaN
	-87.1402	-16.0917					-73.5075	-15.2682													NaN	NaN
	-87.0495	-16.1968					-73.4145	-15.2891													NaN	NaN
	-86.8836	-16.0372					-73.4156	-15.2803													NaN	NaN
	-86.8179	-15.8493					-73.4592	-15.2909													NaN	NaN
	-86.4117	-15.9715					-73.4592	-15.2909													NaN	NaN
	-86.3989	-16.0956					-73.4592	-15.2909													NaN	NaN
	-86.0972	-16.0315					-73.4592	-15.2909													NaN	NaN
	-85.9085	-15.9536					-73.4592	-15.2909													NaN	NaN
	-85.7606	-15.9017					-73.4592	-15.2909													NaN	NaN
	-85.5235	-15.9087					-73.4836	-15.2767													NaN	NaN
	-85.4041	-15.7764					-73.4703	-15.2954													NaN	NaN
	-85.3024	-15.6451					-73.5169	-15.2848													NaN	NaN
	-85.0649	-15.7093					-73.5169	-15.2848													NaN	NaN
	-84.8144	-15.7368					-73.5169	-15.2848													NaN	NaN
	-84.908	-15.7591					-73.5169	-15.2848													NaN	NaN
	-84.6228	-15.7384					-73.4486	-15.3204													NaN	NaN
	-84.219	-15.6518					-73.3561	-15.3573													NaN	NaN
	-83.9224	-15.6821					-73.3306	-15.4238													NaN	NaN
	-83.7557	-15.6202					-73.2525	-15.4176													NaN	NaN
	-83.5889	-15.7779					-73.1718	-15.446													NaN	NaN
	-83.5515	-15.6624					-73.0526	-15.5518													NaN	NaN
	-83.2943	-15.6529					-72.8951	-15.6619													NaN	NaN
	-82.9769	-15.7327					-72.7399	-15.7497													NaN	NaN
	-82.6331	-15.709					-72.6278	-15.8597													NaN	NaN
	-82.5255	-15.7707					-72.381	-15.9877													NaN	NaN
	-82.1624	-15.8068					-72.32	-16.1203													NaN	NaN
	-81.8155	-15.8047					-72.1491	-16.1465													NaN	NaN
	-81.6031	-15.8471					-72.1302	-16.2331													NaN	NaN
	-81.3707	-15.8489					-72.1203	-16.3102													NaN	NaN
	-81.035	-15.7961					-72.0899	-16.3203													NaN	NaN
	-81.1038	-15.8072					-72.0665	-16.3257													NaN	NaN
	-80.822	-15.788					-72.0407	-16.3467													NaN	NaN
	-80.4772	-15.816					-71.9486	-16.4031													NaN	NaN
	-80.2872	-15.8925					-71.8409	-16.4063													NaN	NaN
	-80.0833	-15.9028					-71.7463	-16.5202													NaN	NaN
	-79.9095	-15.9066					-71.6807	-16.5589													NaN	NaN
	-79.532	-15.7168					-71.6255	-16.5386													NaN	NaN
	-79.4005	-15.7237					-71.6807	-16.5589													NaN	NaN
	-79.0491	-15.722					-71.6733	-16.5271													NaN	NaN
	-78.8236	-15.6658					-71.6762	-16.589													NaN	NaN
	-78.5272	-15.473					-71.6733	-16.5271													NaN	NaN
	-78.3905	-15.6535					-71.5885	-16.5295													NaN	NaN
	-78.0878	-15.5363					-71.5362	-16.571													NaN	NaN
	-77.6693	-15.7269					-71.5362	-16.571													NaN	NaN
	-77.6518	-15.6869					-71.5914	-16.5914													NaN	NaN
	-77.4745	-15.6538					-71.5323	-16.5786													NaN	NaN
	-77.2251	-15.8012					-71.5128	-16.5763													NaN	NaN
	-77.057	-15.7332					-71.5128	-16.5763													NaN	NaN
	-76.7469	-15.8314					-71.5128	-16.5763													NaN	NaN
	-76.6432	-15.976					-71.5017	-16.5772													NaN	NaN
	-76.3847	-15.9586					-71.5017	-16.5772													NaN	NaN
	-76.2036	-16.0359					-71.5017	-16.5772													NaN	NaN
	-75.9766	-16.0131					-71.4945	-16.5538													NaN	NaN
	-75.76	-16.2104					-71.4945	-16.5538													NaN	NaN
	-75.4637	-16.0423					-71.4945	-16.5538													NaN	NaN
	-75.3868	-16.2988					-71.48	-16.5484													NaN	NaN
	-74.9931	-16.2932					-71.48	-16.5484													NaN	NaN
	-74.8025	-16.2442					-71.3893	-16.5971													NaN	NaN
	-74.4114	-16.2047					-71.3202	-16.6093													NaN	NaN
	-74.1288	-16.2006					-71.255	-16.6558													NaN	NaN
	-73.9821	-16.4327					-71.1776	-16.7239													NaN	NaN
	-73.6859	-16.4723					-71.0296	-16.8225													NaN	NaN
	-73.3657	-16.3719					-71.0619	-16.8078													NaN	NaN
	-73.1968	-16.5067					-70.8638	-16.8237													NaN	NaN
	-73.2397	-16.4755					-70.8397	-16.9185													NaN	NaN
	-72.7276	-16.2369					-70.8925	-16.9195													NaN	NaN
	-72.5461	-16.2013					-70.8028	-17.0034													NaN	NaN
	-72.3259	-16.2345					-70.7132	-17.0727													NaN	NaN
	-72.1557	-16.2275					-70.0418	-17.5701													NaN	NaN
	-71.9974	-16.1739					-69.504	-17.9111													NaN	NaN
	-71.682	-16.1495					-69.0469	-18.0792													NaN	NaN
	-71.3319	-16.0455					-68.7828	-18.3487													NaN	NaN
	-71.4763	-16.263					-68.281	-18.7321													NaN	NaN
	-70.9292	-16.0947					-67.9433	-18.9509													NaN	NaN
	-70.7703	-16.2142					-67.5955	-19.0799													NaN	NaN
	-70.5258	-16.1729					-67.1667	-19.2603													NaN	NaN
	-70.3784	-16.3381					-66.7453	-19.543													NaN	NaN
	-69.9968	-16.3521					-66.3021	-19.9595													NaN	NaN
	-69.821	-16.409					-65.8575	-20.3105													NaN	NaN
	-69.7795	-16.648					-65.4916	-20.5093													NaN	NaN
	-69.2894	-16.6531					-65.0758	-20.6904													NaN	NaN
	-69.3261	-16.6363					-64.7039	-21.1082													NaN	NaN
	-69.094	-16.8916					-64.3487	-21.3127													NaN	NaN
	-68.8626	-16.9083					-64.0532	-21.4332													NaN	NaN
	-68.8033	-17.3656					-63.4275	-21.8379													NaN	NaN
	-68.6496	-17.3454					-63.0286	-22.028													NaN	NaN
	-68.3283	-17.4833					-62.6403	-22.1807													NaN	NaN
	-68.1201	-17.5679					-62.4122	-22.4766													NaN	NaN
	-67.9036	-17.7651					-61.8426	-22.8329													NaN	NaN
	-67.7871	-17.9458					-61.4977	-23.0521													NaN	NaN
	-67.6815	-18.1928					-61.1502	-23.2914													NaN	NaN
	-67.4629	-18.3543					-60.8074	-23.528													NaN	NaN
	-67.3696	-18.3953					-60.1933	-23.9623													NaN	NaN
	-67.0209	-18.5369					-59.9351	-24.1761													NaN	NaN
	-66.8887	-18.6694					-59.4963	-24.5021													NaN	NaN
	-66.7896	-18.8744					-59.1312	-24.7883													NaN	NaN
	-66.667	-19.0981					-58.8246	-25.0264													NaN	NaN
	-66.4692	-19.1528					-58.527	-25.074													NaN	NaN
	-66.2726	-19.3787					-58.2185	-25.2016													NaN	NaN
	-66.1489	-19.5994					-58.184	-24.9292													NaN	NaN
	-65.9179	-19.5629					-57.7654	-25.2028													NaN	NaN
	-65.854	-19.8444					-57.6871	-25.0194													NaN	NaN
	-65.6438	-19.9332					-57.5329	-24.8699													NaN	NaN
	-65.5205	-20.1009					-57.282	-24.7891													NaN	NaN
																					NaN	NaN
																					NaN	NaN
																					NaN	NaN
																					NaN	NaN
																					NaN	NaN
																					NaN	NaN
																					NaN	NaN
																					NaN	NaN
																					NaN	NaN
																					NaN	NaN
																					NaN	NaN
																					NaN	NaN
																					NaN	NaN
																					NaN	NaN
																					NaN	NaN
																					NaN	NaN
																					NaN	NaN
																					NaN	NaN
																					NaN	NaN
																					NaN	NaN
																					NaN	NaN
																					NaN	NaN
																					NaN	NaN
																					NaN	NaN
																					NaN	NaN
																					NaN	NaN
																					NaN	NaN
																					NaN	NaN
																					NaN	NaN
																					NaN	NaN
																					NaN	NaN
																					NaN	NaN
																					NaN	NaN
																					NaN	NaN
																					NaN	NaN
																					NaN	NaN
																					NaN	NaN
																					NaN	NaN
																					NaN	NaN
																					NaN	NaN
																					NaN	NaN
																					NaN	NaN
																					NaN	NaN
																					NaN	NaN
																					NaN	NaN
																					NaN	NaN
																					NaN	NaN
																					NaN	NaN
																					NaN	NaN
																					NaN	NaN
																					NaN	NaN
																					NaN	NaN
																					NaN	NaN
																					NaN	NaN
																					NaN	NaN
																					NaN	NaN
																					NaN	NaN
																					NaN	NaN
																					NaN	NaN
																					NaN	NaN
																					NaN	NaN
																					NaN	NaN
																					NaN	NaN
																					NaN	NaN
																					NaN	NaN
																					NaN	NaN
																					NaN	NaN
																					NaN	NaN
																					NaN	NaN
																					NaN	NaN
																					NaN	NaN
																					NaN	NaN
																					NaN	NaN
																					NaN	NaN
																					NaN	NaN
																					NaN	NaN
																					NaN	NaN
																					NaN	NaN
																					NaN	NaN
																					NaN	NaN
																					NaN	NaN
																					NaN	NaN
																					NaN	NaN
																					NaN	NaN
																					NaN	NaN
																					NaN	NaN
																					NaN	NaN
																					NaN	NaN
																					NaN	NaN
																					NaN	NaN
																					NaN	NaN
																					NaN	NaN
																					NaN	NaN
																					NaN	NaN
																					NaN	NaN
																					NaN	NaN
																					NaN	NaN
																					NaN	NaN
																					NaN	NaN
																					NaN	NaN
																					NaN	NaN
																					NaN	NaN
																					NaN	NaN
																					NaN	NaN
																					NaN	NaN
																					NaN	NaN
																					NaN	NaN
																					NaN	NaN
																					NaN	NaN
																					NaN	NaN
																					NaN	NaN
																					NaN	NaN
																					NaN	NaN
																					NaN	NaN
																					NaN	NaN
																					NaN	NaN
																					NaN	NaN
																					NaN	NaN
																					NaN	NaN
																					NaN	NaN
																					NaN	NaN
																					NaN	NaN
																					NaN	NaN
																					NaN	NaN
																					NaN	NaN
																					NaN	NaN
																					NaN	NaN
																					NaN	NaN
																					NaN	NaN
																					NaN	NaN
																					NaN	NaN
																					NaN	NaN
																					NaN	NaN
																					NaN	NaN
																					NaN	NaN
																					NaN	NaN
																					NaN	NaN
																					NaN	NaN
																					NaN	NaN
																					NaN	NaN
																					NaN	NaN
																					NaN	NaN
																					NaN	NaN
																					NaN	NaN
																					NaN	NaN
																					NaN	NaN
																					NaN	NaN
																					NaN	NaN
																					NaN	NaN
																					NaN	NaN
																					NaN	NaN
																					NaN	NaN
																					NaN	NaN
																					NaN	NaN
																					NaN	NaN
																					NaN	NaN
																					NaN	NaN
																					NaN	NaN
																					NaN	NaN
																					NaN	NaN
																					NaN	NaN
																					NaN	NaN
																					NaN	NaN
																					NaN	NaN
																					NaN	NaN
																					NaN	NaN
																					NaN	NaN
																					NaN	NaN
																					NaN	NaN
																					NaN	NaN
																					NaN	NaN
																					NaN	NaN
																					NaN	NaN
																					NaN	NaN
																					NaN	NaN
																					NaN	NaN
																					NaN	NaN
																					NaN	NaN
																					NaN	NaN
																					NaN	NaN
																					NaN	NaN
																					NaN	NaN
																					NaN	NaN
																					NaN	NaN
																					NaN	NaN
																					NaN	NaN
																					NaN	NaN
																					NaN	NaN
																					NaN	NaN
																					NaN	NaN
																					NaN	NaN
																					NaN	NaN
																					NaN	NaN
																					NaN	NaN
																					NaN	NaN
																					NaN	NaN
																					NaN	NaN
																					NaN	NaN
																					NaN	NaN
																					NaN	NaN
																					NaN	NaN
																					NaN	NaN
																					NaN	NaN
																					NaN	NaN
																					NaN	NaN
																					NaN	NaN
																					NaN	NaN
																					NaN	NaN
																					NaN	NaN
																					NaN	NaN
																					NaN	NaN
																					NaN	NaN
																					NaN	NaN
																					NaN	NaN
																					NaN	NaN
																					NaN	NaN
																					NaN	NaN
																					NaN	NaN
																					NaN	NaN
																					NaN	NaN
																					NaN	NaN
																					NaN	NaN
																					NaN	NaN
																					NaN	NaN
																					NaN	NaN
																					NaN	NaN
																					NaN	NaN
																					NaN	NaN
																					NaN	NaN
																					NaN	NaN
																					NaN	NaN
																					NaN	NaN
																					NaN	NaN
																					NaN	NaN
																					NaN	NaN
																					NaN	NaN
																					NaN	NaN
																					NaN	NaN
																					NaN	NaN
																					NaN	NaN
																					NaN	NaN
																					NaN	NaN
																					NaN	NaN
																					NaN	NaN
																					NaN	NaN
																					NaN	NaN
																					NaN	NaN
																					NaN	NaN
																					NaN	NaN
																					NaN	NaN
																					NaN	NaN
																					NaN	NaN
																					NaN	NaN
																					NaN	NaN
																					NaN	NaN
																					NaN	NaN
																					NaN	NaN
																					NaN	NaN
																					NaN	NaN
																					NaN	NaN
																					NaN	NaN
																					NaN	NaN
																					NaN	NaN
																					NaN	NaN
																					NaN	NaN
																					NaN	NaN
																					NaN	NaN
																					NaN	NaN
																					NaN	NaN
																					NaN	NaN
																					NaN	NaN
																					NaN	NaN
																					NaN	NaN
																					NaN	NaN
																					NaN	NaN
																					NaN	NaN
																					NaN	NaN
																					NaN	NaN
																					NaN	NaN
																					NaN	NaN
																					NaN	NaN
																					NaN	NaN
																					NaN	NaN
																					NaN	NaN
																					NaN	NaN
																					NaN	NaN
																					NaN	NaN
																					NaN	NaN
																					NaN	NaN
																					NaN	NaN
																					NaN	NaN
																					NaN	NaN
																					NaN	NaN
																					NaN	NaN
																					NaN	NaN
																					NaN	NaN
																					NaN	NaN
																					NaN	NaN
																					NaN	NaN
																					NaN	NaN
																					NaN	NaN
																					NaN	NaN
																					NaN	NaN
																					NaN	NaN
																					NaN	NaN
																					NaN	NaN
																					NaN	NaN
																					NaN	NaN
																					NaN	NaN
																					NaN	NaN
																					NaN	NaN
																					NaN	NaN
																					NaN	NaN
																					NaN	NaN
																					NaN	NaN
																					NaN	NaN
																					NaN	NaN
																					NaN	NaN
																					NaN	NaN
																					NaN	NaN
																					NaN	NaN
																					NaN	NaN
																					NaN	NaN
																					NaN	NaN
																					NaN	NaN
																					NaN	NaN
																					NaN	NaN
																					NaN	NaN
																					NaN	NaN
																					NaN	NaN
																					NaN	NaN
																					NaN	NaN
																					NaN	NaN
																					NaN	NaN
																					NaN	NaN
																					NaN	NaN
																					NaN	NaN
																					NaN	NaN
																					NaN	NaN
																					NaN	NaN
																					NaN	NaN
																					NaN	NaN
																					NaN	NaN
																					NaN	NaN
																					NaN	NaN
																					NaN	NaN
																					NaN	NaN
																					NaN	NaN
																					NaN	NaN
																					NaN	NaN
																					NaN	NaN
																					NaN	NaN
																					NaN	NaN
																					NaN	NaN
																					NaN	NaN
																					NaN	NaN
																					NaN	NaN
																					NaN	NaN
																					NaN	NaN
																					NaN	NaN
																					NaN	NaN
																					NaN	NaN
																					NaN	NaN
																					NaN	NaN
																					NaN	NaN
																					NaN	NaN
																					NaN	NaN
																					NaN	NaN
																					NaN	NaN
																					NaN	NaN
																					NaN	NaN
																					NaN	NaN
																					NaN	NaN
																					NaN	NaN
																					NaN	NaN
																					NaN	NaN
																					NaN	NaN
																					NaN	NaN
																					NaN	NaN
																					NaN	NaN
																					NaN	NaN
																					NaN	NaN
																					NaN	NaN
																					NaN	NaN
																					NaN	NaN
																					NaN	NaN
																					NaN	NaN
																					NaN	NaN
																					NaN	NaN
																					NaN	NaN
																					NaN	NaN
																					NaN	NaN
																					NaN	NaN
																					NaN	NaN
																					NaN	NaN
																					NaN	NaN
																					NaN	NaN
																					NaN	NaN
																					NaN	NaN
																					NaN	NaN
																					NaN	NaN
																					NaN	NaN
																					NaN	NaN
																					NaN	NaN
																					NaN	NaN
																					NaN	NaN
																					NaN	NaN
																					NaN	NaN
																					NaN	NaN
																					NaN	NaN
																					NaN	NaN
																					NaN	NaN
																					NaN	NaN
																					NaN	NaN
																					NaN	NaN
																					NaN	NaN
																					NaN	NaN
																					NaN	NaN
																					NaN	NaN
																					NaN	NaN
																					NaN	NaN
																					NaN	NaN
																					NaN	NaN
																					NaN	NaN
																					NaN	NaN
																					NaN	NaN
																					NaN	NaN
																					NaN	NaN
																					NaN	NaN
																					NaN	NaN
																					NaN	NaN
																					NaN	NaN
																					NaN	NaN
																					NaN	NaN
																					NaN	NaN
																					NaN	NaN
																					NaN	NaN
																					NaN	NaN
																					NaN	NaN
																					NaN	NaN
																					NaN	NaN
																					NaN	NaN
																					NaN	NaN
																					NaN	NaN
																					NaN	NaN
																					NaN	NaN
																					NaN	NaN
																					NaN	NaN
																					NaN	NaN
																					NaN	NaN
																					NaN	NaN
																					NaN	NaN
																					NaN	NaN
																					NaN	NaN
																					NaN	NaN
																					NaN	NaN
																					NaN	NaN
																					NaN	NaN
																					NaN	NaN
																					NaN	NaN
																					NaN	NaN
																					NaN	NaN
																					NaN	NaN
																					NaN	NaN
																					NaN	NaN
																					NaN	NaN
																					NaN	NaN
																					NaN	NaN
																					NaN	NaN
																					NaN	NaN
																					NaN	NaN
																					NaN	NaN
																					NaN	NaN
																					NaN	NaN
																					NaN	NaN
																					NaN	NaN
																					NaN	NaN
																					NaN	NaN
																					NaN	NaN
																					NaN	NaN
																					NaN	NaN
																					NaN	NaN
																					NaN	NaN
																					NaN	NaN
																					NaN	NaN
																					NaN	NaN
																					NaN	NaN
																					NaN	NaN
																					NaN	NaN
																					NaN	NaN
																					NaN	NaN
																					NaN	NaN
																					NaN	NaN
																					NaN	NaN
																					NaN	NaN
																					NaN	NaN
																					NaN	NaN
																					NaN	NaN
																					NaN	NaN
																					NaN	NaN
																					NaN	NaN
																					NaN	NaN
																					NaN	NaN
																					NaN	NaN
																					NaN	NaN
																					NaN	NaN
																					NaN	NaN
																					NaN	NaN
																					NaN	NaN
																					NaN	NaN
																					NaN	NaN
																					NaN	NaN
																					NaN	NaN
																					NaN	NaN
																					NaN	NaN
																					NaN	NaN
																					NaN	NaN
																					NaN	NaN
																					NaN	NaN
																					NaN	NaN
																					NaN	NaN
																					NaN	NaN
																					NaN	NaN
																					NaN	NaN
																					NaN	NaN
																					NaN	NaN
																					NaN	NaN
																					NaN	NaN
																					NaN	NaN
																					NaN	NaN
																					NaN	NaN
																					NaN	NaN
																					NaN	NaN
																					NaN	NaN
																					NaN	NaN
																					NaN	NaN
																					NaN	NaN
																					NaN	NaN
																					NaN	NaN
																					NaN	NaN
																					NaN	NaN
																					NaN	NaN
																					NaN	NaN
																					NaN	NaN
																					NaN	NaN
																					NaN	NaN
																					NaN	NaN
																					NaN	NaN
																					NaN	NaN
																					NaN	NaN
																					NaN	NaN
																					NaN	NaN
																					NaN	NaN
																					NaN	NaN
																					NaN	NaN
																					NaN	NaN
																					NaN	NaN
																					NaN	NaN
																					NaN	NaN
																					NaN	NaN
																					NaN	NaN
																					NaN	NaN
																					NaN	NaN
																					NaN	NaN
																					NaN	NaN
																					NaN	NaN
																					NaN	NaN
																					NaN	NaN
																					NaN	NaN
																					NaN	NaN
																					NaN	NaN
																					NaN	NaN
																					NaN	NaN
																					NaN	NaN
																					NaN	NaN
																					NaN	NaN
																					NaN	NaN
																					NaN	NaN
																					NaN	NaN
																					NaN	NaN
																					NaN	NaN
																					NaN	NaN
																					NaN	NaN
																					NaN	NaN
																					NaN	NaN
																					NaN	NaN
																					NaN	NaN
																					NaN	NaN
																					NaN	NaN
																					NaN	NaN
																					NaN	NaN
																					NaN	NaN
																					NaN	NaN
																					NaN	NaN
																					NaN	NaN
																					NaN	NaN
																					NaN	NaN
																					NaN	NaN
																					NaN	NaN
																					NaN	NaN
																					NaN	NaN
																					NaN	NaN
																					NaN	NaN
																					NaN	NaN
																					NaN	NaN
																					NaN	NaN
																					NaN	NaN
																					NaN	NaN
																					NaN	NaN
																					NaN	NaN
																					NaN	NaN
																					NaN	NaN
																					NaN	NaN
																					NaN	NaN
																					NaN	NaN
																					NaN	NaN
																					NaN	NaN
																					NaN	NaN
																					NaN	NaN
																					NaN	NaN
																					NaN	NaN
																					NaN	NaN
																					NaN	NaN
																					NaN	NaN
																					NaN	NaN
																					NaN	NaN
																					NaN	NaN
																					NaN	NaN
																					NaN	NaN
																					NaN	NaN
																					NaN	NaN
																					NaN	NaN
																					NaN	NaN
																					NaN	NaN
																					NaN	NaN
																					NaN	NaN
																					NaN	NaN
																					NaN	NaN
																					NaN	NaN
																					NaN	NaN
																					NaN	NaN
																					NaN	NaN
																					NaN	NaN
																					NaN	NaN
																					NaN	NaN
																					NaN	NaN
																					NaN	NaN
																					NaN	NaN
																					NaN	NaN
																					NaN	NaN
																					NaN	NaN
																					NaN	NaN
																					NaN	NaN
																					NaN	NaN
																					NaN	NaN
																					NaN	NaN
																					NaN	NaN
																					NaN	NaN
																					NaN	NaN
																					NaN	NaN
																					NaN	NaN
																					NaN	NaN
																					NaN	NaN
																					NaN	NaN
																					NaN	NaN
																					NaN	NaN
																					NaN	NaN
																					NaN	NaN
																					NaN	NaN
																					NaN	NaN
																					NaN	NaN
																					NaN	NaN
																					NaN	NaN
																					NaN	NaN
																					NaN	NaN
																					NaN	NaN
																					NaN	NaN
																					NaN	NaN
																					NaN	NaN
																					NaN	NaN
																					NaN	NaN
																					NaN	NaN
																					NaN	NaN
																					NaN	NaN
																					NaN	NaN
																					NaN	NaN
																					NaN	NaN
																					NaN	NaN
																					NaN	NaN
																					NaN	NaN
																					NaN	NaN
																					NaN	NaN
																					NaN	NaN
																					NaN	NaN
																					NaN	NaN
																					NaN	NaN
																					NaN	NaN
																					NaN	NaN
																					NaN	NaN
																					NaN	NaN
																					NaN	NaN
																					NaN	NaN
																					NaN	NaN
																					NaN	NaN
																					NaN	NaN
																					NaN	NaN
																					NaN	NaN
																					NaN	NaN
																					NaN	NaN
																					NaN	NaN
																					NaN	NaN
																					NaN	NaN
																					NaN	NaN
																					NaN	NaN
																					NaN	NaN
																					NaN	NaN
																					NaN	NaN
																					NaN	NaN
																					NaN	NaN
																					NaN	NaN
																					NaN	NaN
																					NaN	NaN
																					NaN	NaN
																					NaN	NaN
																					NaN	NaN
																					NaN	NaN
																					NaN	NaN
																					NaN	NaN
																					NaN	NaN
																					NaN	NaN
																					NaN	NaN
																					NaN	NaN
																					NaN	NaN
																					NaN	NaN
																					NaN	NaN
																					NaN	NaN
																					NaN	NaN
																					NaN	NaN
																					NaN	NaN
																					NaN	NaN
																					NaN	NaN
																					NaN	NaN
																					NaN	NaN
																					NaN	NaN
																					NaN	NaN
																					NaN	NaN
																					NaN	NaN
																					NaN	NaN
																					NaN	NaN
																					NaN	NaN
																					NaN	NaN
																					NaN	NaN
																					NaN	NaN
																					NaN	NaN
																					NaN	NaN
																					NaN	NaN
																					NaN	NaN
																					NaN	NaN
																					NaN	NaN
																					NaN	NaN
																					NaN	NaN
																					NaN	NaN
																					NaN	NaN
																					NaN	NaN
																					NaN	NaN
																					NaN	NaN
																					NaN	NaN
																					NaN	NaN
																					NaN	NaN
																					NaN	NaN
																					NaN	NaN
																					NaN	NaN
																					NaN	NaN
																					NaN	NaN
																					NaN	NaN
																					NaN	NaN
																					NaN	NaN
																					NaN	NaN
																					NaN	NaN
																					NaN	NaN
																					NaN	NaN
																					NaN	NaN
																					NaN	NaN
																					NaN	NaN
																					NaN	NaN
																					NaN	NaN
																					NaN	NaN
																					NaN	NaN
																					NaN	NaN
																					NaN	NaN
																					NaN	NaN
																					NaN	NaN
																					NaN	NaN
																					NaN	NaN
																					NaN	NaN
																					NaN	NaN
																					NaN	NaN
																					NaN	NaN
																					NaN	NaN
																					NaN	NaN
																					NaN	NaN
																					NaN	NaN
																					NaN	NaN
																					NaN	NaN
																					NaN	NaN
																					NaN	NaN
																					NaN	NaN
																					NaN	NaN
																					NaN	NaN
																					NaN	NaN
																					NaN	NaN
																					NaN	NaN
																					NaN	NaN
																					NaN	NaN
																					NaN	NaN
																					NaN	NaN
																					NaN	NaN
																					NaN	NaN
																					NaN	NaN
																					NaN	NaN
																					NaN	NaN
																					NaN	NaN
																					NaN	NaN
																					NaN	NaN
																					NaN	NaN
																					NaN	NaN
																					NaN	NaN
																					NaN	NaN
																					NaN	NaN
																					NaN	NaN
																					NaN	NaN
																					NaN	NaN
																					NaN	NaN
																					NaN	NaN
																					NaN	NaN
																					NaN	NaN
																					NaN	NaN
																					NaN	NaN
																					NaN	NaN
																					NaN	NaN
																					NaN	NaN
																					NaN	NaN
																					NaN	NaN
																					NaN	NaN
																					NaN	NaN
																					NaN	NaN
																					NaN	NaN
																					NaN	NaN
																					NaN	NaN
																					NaN	NaN
																					NaN	NaN
																					NaN	NaN
																					NaN	NaN
																					NaN	NaN
																					NaN	NaN
																					NaN	NaN
																					NaN	NaN
																					NaN	NaN
																					NaN	NaN
																					NaN	NaN
																					NaN	NaN
																					NaN	NaN
																					NaN	NaN
																					NaN	NaN
																					NaN	NaN
																					NaN	NaN
																					NaN	NaN
																					NaN	NaN
																					NaN	NaN
																					NaN	NaN
																					NaN	NaN
																					NaN	NaN
																					NaN	NaN
																					NaN	NaN
																					NaN	NaN
																					NaN	NaN
																					NaN	NaN
																					NaN	NaN
																					NaN	NaN
																					NaN	NaN
																					NaN	NaN
																					NaN	NaN
																					NaN	NaN
																					NaN	NaN
																					NaN	NaN
																					NaN	NaN
																					NaN	NaN
																					NaN	NaN
																					NaN	NaN
																					NaN	NaN
																					NaN	NaN
																					NaN	NaN
																					NaN	NaN
																					NaN	NaN
																					NaN	NaN
																					NaN	NaN
																					NaN	NaN
																					NaN	NaN
																					NaN	NaN
																					NaN	NaN
																					NaN	NaN
																					NaN	NaN
																					NaN	NaN
																					NaN	NaN
																					NaN	NaN
																					NaN	NaN
																					NaN	NaN
																					NaN	NaN
																					NaN	NaN
																					NaN	NaN
																					NaN	NaN
																					NaN	NaN
																					NaN	NaN
																					NaN	NaN
																					NaN	NaN
																					NaN	NaN
																					NaN	NaN
																					NaN	NaN
																					NaN	NaN
																					NaN	NaN
																					NaN	NaN
																					NaN	NaN
																					NaN	NaN
																					NaN	NaN
																					NaN	NaN
																					NaN	NaN
																					NaN	NaN
																					NaN	NaN
																					NaN	NaN
																					NaN	NaN
																					NaN	NaN
																					NaN	NaN
																					NaN	NaN
																					NaN	NaN
																					NaN	NaN
																					NaN	NaN
																					NaN	NaN
																					NaN	NaN
																					NaN	NaN
																					NaN	NaN
																					NaN	NaN
																					NaN	NaN
																					NaN	NaN
																					NaN	NaN
																					NaN	NaN
																					NaN	NaN
																					NaN	NaN
																					NaN	NaN
																					NaN	NaN
																					NaN	NaN
																					NaN	NaN
																					NaN	NaN
																					NaN	NaN
																					NaN	NaN
																					NaN	NaN
																					NaN	NaN
																					NaN	NaN
																					NaN	NaN
																					NaN	NaN
																					NaN	NaN
																					NaN	NaN
																					NaN	NaN
																					NaN	NaN
																					NaN	NaN
																					NaN	NaN
																					NaN	NaN
																					NaN	NaN
																					NaN	NaN
																					NaN	NaN
																					NaN	NaN
																					NaN	NaN
																					NaN	NaN
																					NaN	NaN
																					NaN	NaN
																					NaN	NaN
																					NaN	NaN
																					NaN	NaN
																					NaN	NaN
																					NaN	NaN
																					NaN	NaN
																					NaN	NaN
																					NaN	NaN
																					NaN	NaN
																					NaN	NaN
																					NaN	NaN
																					NaN	NaN
																					NaN	NaN
																					NaN	NaN
																					NaN	NaN
																					NaN	NaN
																					NaN	NaN
																					NaN	NaN
																					NaN	NaN
																					NaN	NaN
																					NaN	NaN
																					NaN	NaN
																					NaN	NaN
																					NaN	NaN
																					NaN	NaN
																					NaN	NaN
																					NaN	NaN
																					NaN	NaN
																					NaN	NaN
																					NaN	NaN
																					NaN	NaN
																					NaN	NaN
																					NaN	NaN
																					NaN	NaN
																					NaN	NaN
																					NaN	NaN
																					NaN	NaN
																					NaN	NaN
																					NaN	NaN
																					NaN	NaN
																					NaN	NaN
																					NaN	NaN
																					NaN	NaN
																					NaN	NaN
																					NaN	NaN
																					NaN	NaN
																					NaN	NaN
																					NaN	NaN
																					NaN	NaN
																					NaN	NaN
																					NaN	NaN
																					NaN	NaN
																					NaN	NaN
																					NaN	NaN
																					NaN	NaN
																					NaN	NaN
																					NaN	NaN
																					NaN	NaN
																					NaN	NaN
																					NaN	NaN
																					NaN	NaN
																					NaN	NaN
																					NaN	NaN
																					NaN	NaN
																					NaN	NaN
																					NaN	NaN
																					NaN	NaN
																					NaN	NaN
																					NaN	NaN
																					NaN	NaN
																					NaN	NaN
																					NaN	NaN
																					NaN	NaN
																					NaN	NaN
																					NaN	NaN
																					NaN	NaN
																					NaN	NaN
																					NaN	NaN
																					NaN	NaN
																					NaN	NaN
																					NaN	NaN
																					NaN	NaN
																					NaN	NaN
																					NaN	NaN
																					NaN	NaN
																					NaN	NaN
																					NaN	NaN
																					NaN	NaN
																					NaN	NaN
																					NaN	NaN
																					NaN	NaN
																					NaN	NaN
																					NaN	NaN
																					NaN	NaN
																					NaN	NaN
																					NaN	NaN
																					NaN	NaN
																					NaN	NaN
																					NaN	NaN
																					NaN	NaN
																					NaN	NaN
																					NaN	NaN
																					NaN	NaN
																					NaN	NaN
																					NaN	NaN
																					NaN	NaN
																					NaN	NaN
																					NaN	NaN
																					NaN	NaN
																					NaN	NaN
																					NaN	NaN
																					NaN	NaN
																					NaN	NaN
																					NaN	NaN
																					NaN	NaN
																					NaN	NaN
																					NaN	NaN
																					NaN	NaN
																					NaN	NaN
																					NaN	NaN
																					NaN	NaN
																					NaN	NaN
																					NaN	NaN
																					NaN	NaN
																					NaN	NaN
																					NaN	NaN
																					NaN	NaN
																					NaN	NaN
																					NaN	NaN
																					NaN	NaN
																					NaN	NaN
																					NaN	NaN
																					NaN	NaN
																					NaN	NaN
																					NaN	NaN
																					NaN	NaN
																					NaN	NaN
																					NaN	NaN
																					NaN	NaN
																					NaN	NaN
																					NaN	NaN
																					NaN	NaN
																					NaN	NaN
																					NaN	NaN
																					NaN	NaN
																					NaN	NaN
																					NaN	NaN
																					NaN	NaN
																					NaN	NaN
																					NaN	NaN
																					NaN	NaN
																					NaN	NaN
																					NaN	NaN
																					NaN	NaN
																					NaN	NaN
																					NaN	NaN
																					NaN	NaN
																					NaN	NaN
																					NaN	NaN
																					NaN	NaN
																					NaN	NaN
																					NaN	NaN
																					NaN	NaN
																					NaN	NaN
																					NaN	NaN
																					NaN	NaN
																					NaN	NaN
																					NaN	NaN
																					NaN	NaN
																					NaN	NaN
																					NaN	NaN
																					NaN	NaN
																					NaN	NaN
																					NaN	NaN
																					NaN	NaN
																					NaN	NaN
																					NaN	NaN
																					NaN	NaN
																					NaN	NaN
																					NaN	NaN
																					NaN	NaN
																					NaN	NaN
																					NaN	NaN
																					NaN	NaN
																					NaN	NaN
																					NaN	NaN
																					NaN	NaN
																					NaN	NaN
																					NaN	NaN
																					NaN	NaN
																					NaN	NaN
																					NaN	NaN
																					NaN	NaN
																					NaN	NaN
																					NaN	NaN
																					NaN	NaN
																					NaN	NaN
																					NaN	NaN
																					NaN	NaN
																					NaN	NaN
																					NaN	NaN
																					NaN	NaN
																					NaN	NaN
																					NaN	NaN
																					NaN	NaN
																					NaN	NaN
																					NaN	NaN
																					NaN	NaN
																					NaN	NaN
																					NaN	NaN
																					NaN	NaN
																					NaN	NaN
																					NaN	NaN
																					NaN	NaN
																					NaN	NaN
																					NaN	NaN
																					NaN	NaN
																					NaN	NaN
																					NaN	NaN
																					NaN	NaN
																					NaN	NaN
																					NaN	NaN
																					NaN	NaN
																					NaN	NaN
																					NaN	NaN
																					NaN	NaN
																					NaN	NaN
																					NaN	NaN
																					NaN	NaN
																					NaN	NaN
																					NaN	NaN
																					NaN	NaN
																					NaN	NaN
																					NaN	NaN
																					NaN	NaN
																					NaN	NaN
																					NaN	NaN
																					NaN	NaN
																					NaN	NaN
																					NaN	NaN
																					NaN	NaN
																					NaN	NaN
																					NaN	NaN
																					NaN	NaN
																					NaN	NaN
																					NaN	NaN
																					NaN	NaN
																					NaN	NaN
																					NaN	NaN
																					NaN	NaN
																					NaN	NaN
																					NaN	NaN
																					NaN	NaN
																					NaN	NaN
																					NaN	NaN
																					NaN	NaN
																					NaN	NaN
																					NaN	NaN
																					NaN	NaN
																					NaN	NaN
																					NaN	NaN
																					NaN	NaN
																					NaN	NaN
																					NaN	NaN
																					NaN	NaN
																					NaN	NaN
																					NaN	NaN
																					NaN	NaN
																					NaN	NaN
																					NaN	NaN
																					NaN	NaN
																					NaN	NaN
																					NaN	NaN
																					NaN	NaN
																					NaN	NaN
																					NaN	NaN
																					NaN	NaN
																					NaN	NaN
																					NaN	NaN
																					NaN	NaN
																					NaN	NaN
																					NaN	NaN
																					NaN	NaN
																					NaN	NaN
																					NaN	NaN
																					NaN	NaN
																					NaN	NaN
																					NaN	NaN
																					NaN	NaN
																					NaN	NaN
																					NaN	NaN
																					NaN	NaN
																					NaN	NaN
																					NaN	NaN
																					NaN	NaN
																					NaN	NaN
																					NaN	NaN
																					NaN	NaN
																					NaN	NaN
																					NaN	NaN
																					NaN	NaN
																					NaN	NaN
																					NaN	NaN
																					NaN	NaN
																					NaN	NaN
																					NaN	NaN
																					NaN	NaN
																					NaN	NaN
																					NaN	NaN
																					NaN	NaN
																					NaN	NaN
																					NaN	NaN
																					NaN	NaN
																					NaN	NaN
																					NaN	NaN
																					NaN	NaN
																					NaN	NaN
																					NaN	NaN
																					NaN	NaN
																					NaN	NaN
																					NaN	NaN
																					NaN	NaN
																					NaN	NaN
																					NaN	NaN
																					NaN	NaN
																					NaN	NaN
																					NaN	NaN
																					NaN	NaN
																					NaN	NaN
																					NaN	NaN
																					NaN	NaN
																					NaN	NaN
																					NaN	NaN
																					NaN	NaN
																					NaN	NaN
																					NaN	NaN
																					NaN	NaN
																					NaN	NaN
																					NaN	NaN
																					NaN	NaN
																					NaN	NaN
																					NaN	NaN
																					NaN	NaN
																					NaN	NaN
																					NaN	NaN
																					NaN	NaN
																					NaN	NaN
																					NaN	NaN
																					NaN	NaN
																					NaN	NaN
																					NaN	NaN
																					NaN	NaN
																					NaN	NaN
																					NaN	NaN
																					NaN	NaN
																					NaN	NaN
																					NaN	NaN
																					NaN	NaN
																					NaN	NaN
																					NaN	NaN
																					NaN	NaN
																					NaN	NaN
																					NaN	NaN
																					NaN	NaN
																					NaN	NaN
																					NaN	NaN
																					NaN	NaN
																					NaN	NaN
																					NaN	NaN
																					NaN	NaN
																					NaN	NaN
																					NaN	NaN
																					NaN	NaN
																					NaN	NaN
																					NaN	NaN
																					NaN	NaN
																					NaN	NaN
																					NaN	NaN
																					NaN	NaN
																					NaN	NaN
																					NaN	NaN
																					NaN	NaN
																					NaN	NaN
																					NaN	NaN
																					NaN	NaN
																					NaN	NaN
																					NaN	NaN
																					NaN	NaN
																					NaN	NaN
																					NaN	NaN
																					NaN	NaN
																					NaN	NaN
																					NaN	NaN
																					NaN	NaN
																					NaN	NaN
																					NaN	NaN
																					NaN	NaN
																					NaN	NaN
																					NaN	NaN
																					NaN	NaN
																					NaN	NaN
																					NaN	NaN
																					NaN	NaN
																					NaN	NaN
																					NaN	NaN
																					NaN	NaN
																					NaN	NaN
																					NaN	NaN
																					NaN	NaN
																					NaN	NaN
																					NaN	NaN
																					NaN	NaN
																					NaN	NaN
																					NaN	NaN
																					NaN	NaN
																					NaN	NaN
																					NaN	NaN
																					NaN	NaN
																					NaN	NaN
																					NaN	NaN
																					NaN	NaN
																					NaN	NaN
																					NaN	NaN
																					NaN	NaN
																					NaN	NaN
																					NaN	NaN
																					NaN	NaN
																					NaN	NaN
																					NaN	NaN
																					NaN	NaN
																					NaN	NaN
																					NaN	NaN
																					NaN	NaN
																					NaN	NaN
																					NaN	NaN
																					NaN	NaN
																					NaN	NaN
																					NaN	NaN
																					NaN	NaN
																					NaN	NaN
																					NaN	NaN
																					NaN	NaN
																					NaN	NaN
																					NaN	NaN
																					NaN	NaN
																					NaN	NaN
																					NaN	NaN
																					NaN	NaN
																					NaN	NaN
																					NaN	NaN
																					NaN	NaN
																					NaN	NaN
																					NaN	NaN
																					NaN	NaN
																					NaN	NaN
																					NaN	NaN
																					NaN	NaN
																					NaN	NaN
																					NaN	NaN
																					NaN	NaN
																					NaN	NaN
																					NaN	NaN
																					NaN	NaN
																					NaN	NaN
																					NaN	NaN
																					NaN	NaN
																					NaN	NaN
																					NaN	NaN
																					NaN	NaN
																					NaN	NaN
																					NaN	NaN
																					NaN	NaN
																					NaN	NaN
																					NaN	NaN
																					NaN	NaN
																					NaN	NaN
																					NaN	NaN
																					NaN	NaN
																					NaN	NaN
																					NaN	NaN
																					NaN	NaN
																					NaN	NaN
																					NaN	NaN
																					NaN	NaN
																					NaN	NaN
																					NaN	NaN
																					NaN	NaN
																					NaN	NaN
																					NaN	NaN
																					NaN	NaN
																					NaN	NaN
																					NaN	NaN
																					NaN	NaN
																					NaN	NaN
																					NaN	NaN
																					NaN	NaN
																					NaN	NaN
																					NaN	NaN
																					NaN	NaN
																					NaN	NaN
																					NaN	NaN
																					NaN	NaN
																					NaN	NaN
																					NaN	NaN
																					NaN	NaN
																					NaN	NaN
																					NaN	NaN
																					NaN	NaN
																					NaN	NaN
																					NaN	NaN
																					NaN	NaN
																					NaN	NaN
																					NaN	NaN
																					NaN	NaN
																					NaN	NaN
																					NaN	NaN
																					NaN	NaN
																					NaN	NaN
																					NaN	NaN
																					NaN	NaN
																					NaN	NaN
																					NaN	NaN
																					NaN	NaN
																					NaN	NaN
																					NaN	NaN
																					NaN	NaN
																					NaN	NaN
																					NaN	NaN
																					NaN	NaN
																					NaN	NaN
																					NaN	NaN
																					NaN	NaN
																					NaN	NaN
																					NaN	NaN
																					NaN	NaN
																					NaN	NaN
																					NaN	NaN
																					NaN	NaN
																					NaN	NaN
																					NaN	NaN
																					NaN	NaN
																					NaN	NaN
																					NaN	NaN
																					NaN	NaN
																					NaN	NaN
																					NaN	NaN
																					NaN	NaN
																					NaN	NaN
																					NaN	NaN
																					NaN	NaN
																					NaN	NaN
																					NaN	NaN
																					NaN	NaN
																					NaN	NaN
																					NaN	NaN
																					NaN	NaN
																					NaN	NaN
																					NaN	NaN
																					NaN	NaN
																					NaN	NaN
																					NaN	NaN
																					NaN	NaN
																					NaN	NaN
																					NaN	NaN
																					NaN	NaN
																					NaN	NaN
																					NaN	NaN
																					NaN	NaN
																					NaN	NaN
																					NaN	NaN
																					NaN	NaN
																					NaN	NaN
																					NaN	NaN
																					NaN	NaN
																					NaN	NaN
																					NaN	NaN
																					NaN	NaN
																					NaN	NaN
																					NaN	NaN
																					NaN	NaN
																					NaN	NaN
																					NaN	NaN
																					NaN	NaN
																					NaN	NaN
																					NaN	NaN
																					NaN	NaN
																					NaN	NaN
																					NaN	NaN
																					NaN	NaN
																					NaN	NaN
																					NaN	NaN
																					NaN	NaN
																					NaN	NaN
																					NaN	NaN
																					NaN	NaN
																					NaN	NaN
																					NaN	NaN
																					NaN	NaN
																					NaN	NaN
																					NaN	NaN
																					NaN	NaN
																					NaN	NaN
																					NaN	NaN
																					NaN	NaN
																					NaN	NaN
																					NaN	NaN
																					NaN	NaN
																					NaN	NaN
																					NaN	NaN
																					NaN	NaN
																					NaN	NaN
																					NaN	NaN
																					NaN	NaN
																					NaN	NaN
																					NaN	NaN
																					NaN	NaN
																					NaN	NaN
																					NaN	NaN
																					NaN	NaN
																					NaN	NaN
																					NaN	NaN
																					NaN	NaN
																					NaN	NaN
																					NaN	NaN
																					NaN	NaN
																					NaN	NaN
																					NaN	NaN
																					NaN	NaN
																					NaN	NaN
																					NaN	NaN
																					NaN	NaN
																					NaN	NaN
																					NaN	NaN
																					NaN	NaN
																					NaN	NaN
																					NaN	NaN
																					NaN	NaN
																					NaN	NaN
																					NaN	NaN
																					NaN	NaN
																					NaN	NaN
																					NaN	NaN
																					NaN	NaN
																					NaN	NaN
																					NaN	NaN
																					NaN	NaN
																					NaN	NaN
																					NaN	NaN
																					NaN	NaN
																					NaN	NaN
																					NaN	NaN
																					NaN	NaN
																					NaN	NaN
																					NaN	NaN
																					NaN	NaN
																					NaN	NaN
																					NaN	NaN
																					NaN	NaN
																					NaN	NaN
																					NaN	NaN
																					NaN	NaN
																					NaN	NaN
																					NaN	NaN
																					NaN	NaN
																					NaN	NaN
																					NaN	NaN
																					NaN	NaN
																					NaN	NaN
																					NaN	NaN
																					NaN	NaN
																					NaN	NaN
																					NaN	NaN
																					NaN	NaN
																					NaN	NaN
																					NaN	NaN
																					NaN	NaN
																					NaN	NaN
																					NaN	NaN
																					NaN	NaN
																					NaN	NaN
																					NaN	NaN
																					NaN	NaN
																					NaN	NaN
																					NaN	NaN
																					NaN	NaN
																					NaN	NaN
[truncated: 545,121+ more rows]
[truncated: 681 more columns]

## Sheet: 2C
Detect	N =	6553
Time (s)	-0.5	-0.495	-0.49	-0.485	-0.48	-0.475	-0.47	-0.465	-0.46	-0.455	-0.45	-0.445	-0.44	-0.435	-0.43	-0.425	-0.42	-0.415	-0.41	-0.405	-0.4	-0.395	-0.39	-0.385	-0.38	-0.375	-0.37	-0.365	-0.36	-0.355	-0.35	-0.345	-0.34	-0.335	-0.33	-0.325	-0.32	-0.315	-0.31	-0.305	-0.3	-0.295	-0.29	-0.285	-0.28	-0.275	-0.27	-0.265	-0.26
	Euc Dist (cm)
Sequence 1	30.1996	30.1764	30.1041	29.8954	29.7165	29.6549	29.6517	29.2662	29.3299	29.1602	28.988	28.9186	28.7941	28.6286	28.5711	28.4673	28.4851	28.3704	28.3271	28.0922	27.984	27.7873	27.7939	27.5703	27.4744	27.2645	27.2547	27.1051	27.1303	26.9167	26.7444	26.6374	26.5952	26.5018	26.3654	26.2222	26.3584	26.1658	26.1174	26.0795	25.957	25.8762	25.9032	25.7397	25.7548	25.7008	25.5034	25.45	25.5017
Sequence 2	40.6639	40.7275	40.7559	40.9328	40.884	40.8824	40.9613	40.9926	40.8647	40.9807	40.964	40.823	40.7666	41.0634	40.8979	40.885	40.9442	41.056	41.0325	41.1454	41.2577	41.3336	41.3094	41.3221	41.3708	41.6159	41.6113	41.5822	41.5674	41.4945	41.5412	41.4977	41.4754	41.4783	41.5166	41.5209	41.5385	41.5233	41.5166	41.6107	41.8461	41.7209	41.8898	41.9532	41.9897	42.1201	42.1219	42.1956	42.2204
Sequence 3	30.4806	30.3241	30.4646	30.4495	30.4429	30.3819	30.377	30.0446	30.0173	30.0538	29.9035	29.8798	29.851	29.8884	29.6878	29.6436	29.4573	29.5507	29.1072	29.2824	29.2738	29.1929	28.9582	29.0076	28.8548	29.0156	29.0817	28.9231	28.7989	28.9362	28.8933	28.712	28.6219	28.6162	28.6955	28.4363	28.3996	28.4587	28.4003	28.3448	28.3123	28.2691	28.1706	27.9827	28.1978	27.8926	27.8241	27.9002	27.8349
Sequence 4	25.2348	25.2019	25.1524	25.1692	25.234	25.1744	25.182	25.1487	25.0876	25.0739	24.8483	24.966	25.0183	25.098	25.229	25.0779	24.8775	25.1566	25.1485	24.7671	25.1636	24.9354	25.0367	24.9261	24.8957	24.9131	24.9172	24.8069	24.7054	24.8585	24.7841	24.5807	24.7456	24.7057	24.6752	24.4419	24.4985	24.6444	24.3163	24.1427	24.3421	24.2687	24.3451	24.3197	24.2161	24.169	24.3201	24.1288	24.1879
Sequence 5	54.0454	53.9614	53.9645	53.8968	53.9397	53.776	53.8988	53.788	53.7925	53.7399	53.6228	53.8879	53.7144	53.7912	53.6808	53.6431	53.6679	53.6987	53.6137	53.5577	53.4399	53.5303	53.5673	53.6466	53.618	53.4892	53.4094	53.4269	53.4015	53.2812	53.3919	53.3016	53.252	53.0821	53.3125	53.144	53.01	52.8954	53.064	52.9911	52.9418	52.8046	52.8107	52.9126	52.6943	52.7591	52.7105	52.8624	52.6948
Sequence 6	25.4577	25.589	25.5935	25.6408	25.7205	25.8693	26.0411	26.0982	25.9853	26.2007	26.3075	26.3221	26.2339	26.3546	26.2804	26.4149	26.3885	26.5049	26.3734	26.3728	26.1822	26.449	25.9624	26.2623	25.9446	25.6688	25.704	25.5997	25.3773	25.4001	25.4633	25.5617	25.59	25.1771	25.0628	25.0307	24.8592	24.7483	24.8267	24.436	24.5172	24.3427	24.3225	24.2385	24.1186	23.9073	23.763	23.7374	23.737
Sequence 7	47.6938	48.1007	47.6405	47.7101	47.7508	47.6017	47.8187	47.3867	47.4616	47.3675	47.1668	46.5922	46.7747	46.7916	46.9648	46.4127	46.409	46.3957	46.2083	46.1875	46.2085	46.0883	46.0611	45.9951	45.8656	45.9404	45.9573	45.7503	45.5643	45.6283	45.5375	45.396	45.6252	45.2469	45.5586	45.0283	45.0979	45.3059	45.3316	45.0992	45.1284	44.9501	45.1222	44.9408	44.8442	44.5125	44.4721	44.5521	44.3874
Sequence 8	25.2638	25.3837	25.4277	25.4693	25.3931	25.3368	25.498	25.5925	25.605	25.884	25.9141	25.9262	25.9069	25.7683	25.8809	25.8791	25.814	25.9104	25.8645	25.9207	25.8734	25.7056	25.5506	25.4936	25.4188	25.5135	25.4624	25.6986	25.3292	25.2977	25.1559	25.7131	25.6099	25.4756	25.4542	25.3503	25.5459	25.4397	25.5059	25.3989	25.5492	25.4724	25.5248	25.4952	25.5045	25.5995	25.6384	25.4586	25.4604
Sequence 9	NaN	29.7733	29.8825	29.9238	30.0457	30.1229	30.1122	30.1265	30.1783	30.336	30.5913	30.6451	30.5362	30.4814	30.6177	30.8244	30.8233	31.0736	31.1176	31.1317	31.1692	31.2352	31.3408	31.2966	31.377	31.4076	31.5045	31.633	31.6289	31.6275	31.7319	31.9399	31.8749	31.9256	32.0327	32.1049	32.2652	32.1184	32.191	32.2199	32.1948	32.099	32.0636	31.9773	31.9978	31.9545	31.9023	31.9682	31.9397
Sequence 10	42.8958	42.9104	42.8734	42.7709	42.9866	42.9477	42.9131	42.4567	42.3354	42.3951	42.2065	42.4846	42.0956	42.1128	42.0186	41.9925	41.9128	41.9007	41.5151	41.2726	41.3839	41.0658	40.8747	40.7978	40.5422	40.5712	40.4021	40.2227	40.1614	40.0196	39.8463	39.9165	39.6787	39.6022	39.3778	39.4851	39.1766	39.1892	38.9276	38.9276	38.8351	38.9537	38.7164	38.84	38.9159	38.7511	38.8105	38.8247	38.7842
Sequence 11	28.4762	28.3895	28.5887	28.4701	28.5087	28.3394	28.3351	28.1333	28.181	28.3096	28.3384	28.2698	28.2269	28.103	28.1203	28.1612	28.1716	28.152	28.2264	28.3159	28.0893	28.3202	28.2012	28.5555	28.3588	28.3884	28.2931	28.2526	28.3575	28.2987	28.5277	28.56	28.5135	28.3546	28.4074	28.3661	28.438	28.4979	28.5379	28.6044	28.4624	28.5444	28.5268	28.6866	28.6026	28.6269	28.7034	28.9551	28.789
Sequence 12	NaN	40.9577	40.8925	40.9196	41.0984	40.9361	41.096	41.0803	41.1342	41.0937	41.3126	41.0846	41.2292	41.3061	41.2829	41.4063	41.5132	41.6588	41.6216	41.6582	41.706	41.7892	41.9322	41.8993	42.1875	42.4424	42.3143	42.2947	42.617	42.6487	42.7532	42.645	42.7835	42.8399	43.0564	42.9433	43.0952	43.2058	43.2044	43.2561	43.1597	43.3423	43.4433	43.4194	43.5146	43.4614	43.4798	43.5978	43.6613
Sequence 13	27.7197	27.8042	28.2413	27.8583	28.1121	28.1073	27.987	27.7844	27.7467	27.6852	27.6171	27.8241	27.7491	27.8067	27.5402	27.5859	27.5418	27.6623	27.6339	27.6494	27.7434	27.5711	27.6798	27.6326	27.7923	27.5591	27.4952	27.5674	27.5287	27.2666	27.191	27.107	27.1614	27.1461	27.0728	26.7372	26.9956	26.8767	27.0086	26.8289	26.8949	26.9899	27.0608	26.9033	26.9615	26.9669	26.8483	26.8375	26.9296
Sequence 14	53.2248	52.9212	52.983	52.8361	52.8707	52.9487	52.8116	52.8517	52.8184	52.6942	52.695	52.7754	52.7525	52.6126	52.655	52.5571	52.6321	52.7633	52.5082	52.459	52.3993	52.1473	52.0447	51.9901	51.8849	51.7968	51.7622	51.672	51.6811	51.3724	51.4153	51.2458	51.4677	51.2644	51.2844	51.2717	51.0813	51.2288	51.1221	50.8541	50.804	50.8118	50.6413	50.5779	50.5315	50.424	50.3798	50.2917	50.2467
Sequence 15	31.0638	31.1218	31.3264	31.4178	31.4807	31.3431	31.6617	31.6014	31.6766	31.5866	32.1048	32.0791	31.8983	32.2569	32.3175	32.0852	32.0622	32.1779	32.2815	32.1368	32.2087	32.3936	32.6939	32.7499	32.7366	32.8219	32.8953	32.9782	32.996	33.0762	33.2003	33.2388	33.2569	33.2962	33.3554	33.3628	33.458	33.3533	33.5028	33.4661	33.5121	33.7879	33.639	33.7639	33.8482	33.7277	33.6401	33.7531	33.5986
Sequence 16	32.2364	31.9844	32.0922	31.9314	31.926	31.7809	31.8261	31.7605	31.8709	31.7717	31.7742	31.7112	31.712	31.7705	31.6765	31.618	31.5972	31.6157	31.7263	31.5722	31.4721	31.3379	31.3465	31.3425	31.2728	31.1772	31.1077	30.8242	30.7322	30.6142	30.4598	30.2342	30.1936	30.1422	30.0703	30.0208	29.8451	29.8092	29.5679	29.6198	29.2774	29.1344	28.9674	28.9126	28.6943	28.5708	28.4815	28.3604	28.2722
Sequence 17	NaN	70.0872	70.1525	70.6014	70.636	70.814	70.7006	70.6991	70.7358	70.5849	70.7324	70.7349	70.785	70.7489	70.7391	70.7822	71.1006	70.9879	70.8442	70.9018	70.8837	70.895	70.9145	71.0342	71.1329	71.2757	71.1647	71.0573	71.3015	71.3609	71.3362	71.2409	71.3423	71.5852	71.3166	71.3609	71.3887	71.4587	71.3354	71.3035	71.3162	71.3641	71.3526	71.2826	71.0776	71.0149	71.0739	71.154	71.2496
Sequence 18	NaN	100.206	100.348	100.086	100.008	100.078	99.9003	99.9361	99.8789	99.8464	99.8206	99.5994	99.8414	99.7319	99.6722	99.7096	99.4005	99.3982	99.3867	99.4072	99.2927	98.9694	98.9545	98.7672	98.7303	98.6924	98.457	98.7865	98.6593	98.545	98.5258	98.4804	98.4241	98.505	98.3412	97.9466	98.1283	98.1382	98.1451	98.01	97.9301	97.8867	97.948	97.8225	97.7528	97.5699	97.4695	97.3971	97.4791
Sequence 19	33.6875	33.642	33.7894	33.6025	33.8746	33.8737	33.9142	34.0929	34.1531	34.2498	34.3909	34.5547	34.2078	34.3743	34.3972	34.6729	34.8703	35.0769	35.2457	35.3742	35.3793	35.5876	35.4007	35.8268	35.7273	35.8457	35.5962	36.0461	36.1123	35.9729	36.1102	36.3084	36.2973	36.25	36.2598	36.365	36.3896	36.228	36.177	36.1564	36.3466	36.2435	36.2824	36.2033	36.0244	36.1567	36.0565	35.8325	35.7245
Sequence 20	27.6505	27.6178	27.6162	27.4414	27.436	27.4641	27.7331	27.4396	27.888	27.7314	28.1704	28.0677	27.9752	27.8439	27.9734	27.7974	27.7394	27.6782	27.7929	27.9476	27.943	27.8779	27.9208	27.8725	28.0386	27.9833	27.9193	28.043	28.1887	28.1177	28.2162	28.0795	28.1208	28.3275	28.2188	28.1538	28.3385	28.2468	28.341	28.3199	28.3473	28.5332	28.5564	28.4225	28.6853	28.1938	27.8472	27.5178	27.3423
Sequence 21	15.5088	16.2825	16.6181	17.1238	17.6531	18.2375	18.6522	19.1161	19.6915	20.5348	20.7569	21.1893	21.7263	21.9369	22.1114	22.2099	21.9077	21.9107	21.8974	22.1162	22.2686	22.3626	22.4311	22.4243	22.5809	22.6993	22.7248	22.8423	22.8107	22.961	22.9047	22.9758	23.0125	22.9135	22.8387	22.8986	22.7939	22.8628	22.7878	22.7042	22.6063	22.4602	22.1335	22.0974	21.8297	21.6578	21.4819	21.3789	21.2821
Sequence 22	24.6303	24.6643	24.5292	24.3798	24.1307	24.3852	24.2859	24.1351	23.9556	23.8675	23.5581	23.6315	23.403	23.2351	22.9942	22.7964	22.6359	22.3221	22.4016	22.0251	21.8417	21.5086	21.4684	21.3183	21.089	20.9293	20.8629	20.421	20.4043	20.2393	20.0594	19.7068	19.6758	19.5011	19.2506	19.1359	18.9555	18.6108	18.5123	18.4099	18.1151	18.0404	17.8905	17.66	17.6406	17.4188	17.2649	16.9855	16.9872
Sequence 23	NaN	71.1045	71.061	70.9916	70.9182	70.9858	70.8365	70.8449	70.7523	70.6182	70.7688	70.8345	70.8313	70.8287	70.8735	70.7658	70.7442	70.5678	70.6519	70.5049	70.5368	70.5031	70.486	70.5891	70.2736	70.2875	70.3004	70.3839	70.4081	70.2792	70.1726	70.2235	70.1607	70.0485	70.201	70.1492	69.7959	69.9652	69.8594	69.6858	69.8275	69.783	69.7512	69.6461	69.6165	69.6628	69.5627	69.6779	69.6913
Sequence 24	32.0099	31.81	31.8369	31.8417	31.9359	31.8901	31.6845	31.6145	31.6312	31.7077	31.8377	31.729	31.8159	31.9976	31.6284	31.9685	31.9395	31.9508	31.8379	31.7218	31.5342	31.6998	31.5888	31.5472	31.6809	31.4394	31.4961	31.3226	31.244	31.1275	31.1134	31.2118	31.1904	31.0197	31.0463	30.9589	30.885	30.8137	30.7285	30.7343	30.6892	30.6599	30.5518	30.575	30.5901	30.4004	30.4827	30.4797	30.432
Sequence 25	NaN	78.5749	78.3754	78.5463	78.3887	78.2231	78.1813	78.224	77.95	77.7646	77.6778	77.5862	77.531	77.4468	77.2782	77.1888	77.0101	76.8395	76.8286	76.6137	76.4258	76.3954	76.2096	76.2084	75.9941	75.975	75.7659	75.6561	75.5662	75.4236	75.397	75.1375	75.0068	74.984	74.75	74.842	74.6685	74.5143	74.2236	74.1895	74.1763	74.1024	74.0547	73.8227	73.8732	73.732	73.7295	73.6757	73.551
Sequence 26	NaN	38.9296	37.9955	37.4535	36.8989	36.4195	35.8735	35.6582	35.2662	34.9444	34.82	34.4466	34.2382	33.9449	33.6454	33.499	33.3647	32.9841	32.7712	32.4952	32.3967	32.1058	31.9994	31.8078	31.5678	31.2841	31.3879	31.2245	30.7675	30.693	30.6916	30.6376	30.5056	30.4159	30.3088	30.2709	30.197	30.1088	29.9871	29.9273	29.8151	29.7486	29.8077	29.8351	29.8049	29.9372	29.8809	29.9792	29.9804
Sequence 27	28.8859	28.9307	28.9257	28.8241	28.8892	28.8637	28.8544	28.8587	28.8484	28.8925	28.8985	28.91	28.8981	28.8707	29.0815	29.0458	29.0394	29.0242	29.1312	29.2444	29.1435	29.2186	29.3022	29.3077	29.4731	29.613	29.441	29.5326	29.6017	29.7281	29.9013	29.8827	29.8956	29.5706	29.5778	29.6874	29.6199	29.7539	29.7856	29.5206	29.6959	29.483	29.7401	29.548	29.5565	29.4765	29.5303	29.6434	29.5774
Sequence 28	39.737	39.5331	39.4354	39.339	39.2198	39.2154	38.8989	38.8091	38.8163	38.8528	38.7258	38.5726	38.4968	38.5967	38.5786	38.4018	38.4486	38.2007	38.2626	38.2898	37.9574	37.9155	37.8158	37.6936	37.6951	37.633	37.4916	37.3211	37.3649	37.2987	37.145	36.8671	36.9082	36.678	36.7739	36.6958	36.3697	36.4011	36.3793	36.4083	36.3284	36.2814	36.2714	36.1628	36.1478	36.0759	35.8328	35.9378	35.9448
Sequence 29	39.8086	39.6008	39.6132	39.4224	38.9888	39.0858	38.7486	38.8877	38.8104	38.7426	38.3546	38.1622	38.0803	37.8639	37.6167	37.5118	37.2585	37.0712	36.9429	36.8254	36.6576	36.49	36.3201	36.1332	36.0927	36.0158	35.8569	35.63	35.7564	35.6028	35.5909	35.4406	35.5006	35.2564	35.2475	35.534	35.4532	35.2108	35.1905	35.241	35.0435	35.0659	34.9838	35.0069	34.9428	34.94	34.7973	34.9307	34.8181
Sequence 30	NaN	62.7894	62.5882	62.6237	62.289	62.2459	61.8295	61.7747	61.676	61.2898	61.2273	61.1565	60.8166	60.6385	60.4764	60.3211	60.1183	59.9707	59.7203	59.5696	59.3214	59.2664	59.0231	59.0028	58.8944	58.6701	58.5067	58.4634	58.2191	58.1045	58.0586	57.741	57.772	57.4334	57.3789	57.2256	56.9424	56.7497	56.5989	56.4878	56.4157	56.1804	55.8919	55.8566	55.6702	55.4495	55.5248	55.2356	55.0483
Sequence 31	NaN	76.078	76.1059	75.9869	75.9987	76.1273	76.0292	75.9636	76.0099	76.0382	76.0082	75.9703	75.9786	76.0581	75.9887	75.9183	75.987	75.8982	75.9036	75.8922	75.9151	75.9176	75.979	76.0562	76.0767	76.1264	76.0754	75.8963	75.9818	75.8946	75.9636	76.0594	76.125	76.064	76.112	76.2872	76.3155	76.2853	76.0591	76.0459	76.1242	76.2562	76.2464	76.2514	76.2061	76.131	76.1303	76.2463	76.032
Sequence 32	NaN	64.8548	64.7926	64.7001	64.5685	64.4437	64.8374	64.4891	64.7058	64.3577	64.1864	64.1788	64.1267	64.2203	63.8797	63.5979	63.5605	63.6928	63.4196	63.3156	63.2279	62.891	62.9949	62.6334	62.4671	62.4624	62.2621	62.0925	61.8789	61.6792	61.6221	61.3567	61.3847	61.3251	61.148	60.8657	60.6345	60.4446	60.4215	60.2266	60.0394	60.0285	59.8923	59.4309	59.2395	58.9485	58.7879	58.8035	58.5322
Sequence 33	34.8505	34.6663	34.86	34.9389	34.8813	34.7525	34.6198	34.4714	34.4748	34.2315	34.1337	33.8055	33.7178	33.5171	33.3042	33.2688	33.1129	33.0219	32.8785	32.5952	32.4423	32.2789	32.2842	32.0477	31.8748	31.5669	31.7734	31.4594	31.222	31.2839	31.0632	30.8995	30.4876	30.6554	30.2485	30.242	29.964	29.7719	29.6961	29.403	29.4628	29.1972	28.9196	29.2235	28.9493	28.6726	28.6913	28.4901	28.4942
Sequence 34	22.6883	22.5628	22.5462	22.3425	22.2443	22.2473	22.0346	21.7975	21.9173	21.8909	21.7093	21.6315	21.5217	21.3105	21.3414	21.2032	20.9867	21.1452	21.0971	21.024	20.7819	20.6229	20.7372	20.8366	20.7888	20.9188	21.0224	21.226	21.2158	21.1966	21.7008	22.2736	23.2874	23.8528	24.6065	25.2973	25.874	26.3213	27.1958	27.7219	28.6848	29.2023	29.7872	30.2467	30.7964	31.5804	32.1185	32.6799	33.4455
Sequence 35	42.7521	42.2805	42.3746	42.3789	42.3085	42.1835	42.3031	41.9122	42.0205	42.1199	41.8374	41.9651	41.9591	41.6871	41.7532	41.7891	41.7142	41.5701	41.725	41.6087	41.6033	41.4338	41.4336	41.5416	41.6133	41.4162	41.589	41.4899	41.3837	41.4672	41.2934	41.1887	41.0648	41.2653	41.2218	41.1283	40.914	41.1093	40.8917	40.7572	40.4994	40.6536	40.5112	40.4417	40.3403	40.2268	39.9924	39.9002	39.8227
Sequence 36	NaN	71.7923	72.0324	72.0126	71.9738	72.0134	71.8627	71.8327	71.9158	71.9158	72.0521	71.928	71.724	71.6744	72.1302	71.9486	72.0915	72.0408	72.0515	71.946	72.0747	72.0046	71.9942	71.8885	71.882	71.9973	71.9571	71.9781	71.9563	71.8409	71.8392	71.8427	72.0051	71.7779	71.913	71.957	72.0122	71.8384	72.0515	71.9006	71.8497	71.8415	71.8993	71.9505	71.8883	71.8368	72.0003	72.0505	72.0388
Sequence 37	39.1733	38.8513	38.8036	38.4174	38.3021	38.145	37.9748	37.6843	37.7408	37.6983	37.5876	37.5901	37.2648	37.234	37.0489	36.8986	36.7819	36.7302	36.5216	36.3847	36.3598	36.1314	36.0936	36.1491	35.9623	35.7506	35.7957	35.7364	35.5784	35.7257	35.5746	35.8485	35.7617	35.5303	35.2863	35.3962	35.2647	35.2297	35.268	35.149	34.959	34.9152	34.9558	34.9836	35.0419	34.6905	34.6307	34.5397	34.6518
Sequence 38	NaN	68.1672	68.1551	68.0912	67.9926	67.9723	67.9555	67.8185	67.6147	67.6192	67.5071	67.4366	67.3191	67.2278	67.2197	67.1184	67.2286	66.9637	66.9188	66.7799	66.764	66.7087	66.5078	66.3858	66.1809	66.1406	65.8985	65.7685	65.5955	65.3731	65.2562	65.0256	64.8329	64.7143	64.4599	64.2954	63.9042	64.0108	63.52	63.6372	63.3042	63.1905	63.1222	62.8352	62.7859	62.7456	62.6278	62.5241	62.3908
Sequence 39	31.3228	31.2409	31.2631	30.9284	30.7906	30.7045	30.6169	30.3035	30.2131	30.0582	30.0497	29.8707	29.5294	29.4473	29.4602	29.0037	29.004	28.8635	28.6923	28.64	28.5996	28.2889	28.2386	28.2078	27.956	27.9728	27.7175	27.7549	27.6085	27.5136	27.3734	27.161	27.2138	27.0373	27.0213	26.6142	26.7737	26.5219	26.5707	26.7066	26.2331	26.4429	26.5433	26.5058	26.5772	26.4366	26.5451	26.298	26.5995
Sequence 40	46.9182	46.9711	46.8602	47.0604	47.0445	47.0304	47.0915	46.902	46.8168	46.7629	47.0363	46.9932	47.1037	47.1381	47.1515	47.2276	47.2359	47.0987	47.19	47.279	47.3044	47.0782	47.0304	47.0906	47.226	47.2434	47.1567	47.0696	47.1261	47.2189	47.3703	47.3468	47.4013	47.3896	47.2759	47.1759	47.1658	47.194	47.3957	47.2707	47.1574	47.1201	47.1312	47.1547	46.9409	46.911	46.9086	46.8489	46.9376
Sequence 41	52.0506	51.983	52.0342	51.9373	51.916	51.777	52.0427	51.9649	51.6261	51.5475	51.4605	51.4482	51.19	51.1885	51.0821	51.0749	50.9215	50.9013	50.7377	50.6592	50.5746	50.726	50.6136	50.5477	50.3168	50.3875	50.3224	50.1952	50.2152	50.2092	50.0492	50.0016	49.9705	49.6398	49.4829	49.5202	49.3734	49.2474	49.1227	49.153	48.8416	48.7844	48.8407	48.6938	48.5313	48.3208	48.0819	47.8022	47.732
Sequence 42	41.9021	41.8128	41.855	41.8465	41.9212	41.9441	41.8523	42.012	42.0005	41.7604	41.8464	41.8498	41.5872	41.662	41.6613	41.6408	41.7131	41.7574	41.8365	41.8146	41.8171	41.9819	41.9699	42.0269	42.0194	41.9731	41.967	41.9533	41.9696	41.8276	42.0339	41.8867	41.9678	42.1405	42.148	42.1339	41.9957	42.259	42.3136	42.2974	42.1585	42.1479	42.5206	42.5399	42.5309	42.404	42.4012	42.4378	42.4481
Sequence 43	74.7046	74.6662	74.0382	74.104	73.7829	73.6524	73.3331	72.7935	72.8343	72.5373	72.4033	72.0622	71.6544	71.4843	71.4645	71.112	70.5786	70.4019	70.3037	70.1837	70.0607	69.7192	69.5546	69.504	69.2916	69.0609	69.0326	68.7087	68.5236	68.376	68.2262	68.0136	67.7017	67.4497	67.3324	67.2794	67.0833	66.9942	66.8374	66.7945	66.5278	66.4518	66.3798	65.9754	65.9013	65.7941	65.5352	65.457	65.2685
Sequence 44	21.4135	21.7725	22.2612	22.5653	23.1587	23.4094	23.5571	24.3943	24.4772	25.0105	25.4152	25.736	26.2455	26.5304	27.0358	27.2176	27.6567	28.1005	28.4594	29.1841	29.2797	29.787	30.1722	30.5491	31.0134	31.4873	31.93	32.4305	32.5671	33.0291	32.666	32.945	32.8081	32.9176	32.5205	32.4794	32.2995	32.0012	31.9862	31.6605	31.5997	31.55	31.4801	31.383	31.1549	31.2367	31.1573	31.0459	30.8435
Sequence 45	30.1038	29.9642	29.8538	29.6842	29.9395	29.5382	29.297	29.3261	29.2033	28.9871	28.7862	28.8597	28.7958	28.9208	28.9712	28.4193	28.6577	28.5375	28.5296	28.296	28.2898	28.3404	28.307	28.3273	28.4528	28.4293	28.439	28.5369	28.4535	28.4625	28.7325	28.7908	28.4466	28.8358	28.9038	28.8217	28.9315	29.2185	29.2183	29.2432	29.2331	29.1489	29.3879	29.3141	29.4168	29.4033	29.3243	29.6851	29.7448
Sequence 46	56.4135	56.4098	56.3885	56.4838	56.5547	56.4971	56.5167	56.5346	56.5092	56.6262	56.5501	56.6113	56.6395	56.6229	56.5936	56.5871	56.562	56.5571	56.7599	56.4978	56.5958	56.7333	56.8194	56.6768	56.6625	56.6818	56.7239	56.7	56.7323	56.7874	56.5951	56.6199	56.64	56.6162	56.3689	56.5371	56.49	56.5784	56.5281	56.521	56.4621	56.4706	56.3822	56.3653	56.3073	56.3128	56.3036	56.1347	55.914
Sequence 47	54.6491	54.658	54.6289	54.4582	54.3946	54.4151	54.6699	54.253	54.1279	54.1674	54.1892	54.068	54.0256	53.8875	53.697	53.8311	53.6485	53.6336	53.7547	53.6719	53.3919	53.3658	53.2387	53.2189	53.0607	52.9881	52.8798	52.9024	52.8271	52.7335	52.7676	52.841	52.7209	52.7061	52.8121	52.7149	52.5486	52.6102	52.4524	52.4469	52.1501	52.125	52.2188	52.1297	52.0569	51.8559	51.792	51.7212	51.7506
Sequence 48	35.4298	35.537	35.691	35.0371	35.0377	34.8767	34.7301	34.7926	34.3737	34.2181	34.0569	34.0561	34.0397	33.8774	33.9633	34.0742	33.9056	33.7291	33.3689	33.4845	33.7973	33.8168	33.7282	33.5963	33.5156	33.5562	33.856	33.8176	33.8124	33.9484	34.3772	34.4542	34.2465	34.6748	34.7643	34.8892	34.9805	35.0415	35.0066	35.1759	35.2111	35.0459	34.8222	35.0083	34.9345	34.9245	34.827	34.7583	34.6213
Sequence 49	55.1536	54.9281	54.9706	54.8013	54.7302	54.5685	54.4637	54.3418	54.1796	54.1261	53.7865	53.7895	53.6495	53.4526	53.3339	53.3128	53.1598	53.198	52.871	52.7591	52.8824	52.6384	52.7638	52.5213	52.323	52.0271	52.1673	52.0954	51.892	51.9625	51.8191	51.5929	51.3801	51.2587	51.0863	51.0255	50.9473	50.8053	50.7182	50.6841	50.378	50.2195	50.1245	50.2614	50.0752	49.8675	49.8886	49.7487	49.8209
Sequence 50	36.0222	36.0631	36.109	36.3348	36.3501	36.4135	36.1034	36.1272	36.3836	36.284	36.3659	36.3075	36.4272	36.3621	36.3082	36.4016	36.1567	36.2746	36.4034	36.2239	36.2704	36.2567	36.3253	36.3436	36.334	36.344	36.3921	36.3907	36.4839	36.2172	36.179	36.2069	36.2018	36.3461	36.5508	36.348	36.1596	36.1151	36.2217	36.3652	36.2992	36.3309	36.2176	36.0633	36.1184	36.0764	36.1606	36.1191	36.183
Sequence 51	89.2653	89.2708	89.2065	89.0129	89.0341	88.8068	88.8172	88.7188	88.582	88.5892	88.5346	88.4116	88.418	88.1214	88.15	88.1414	88.1218	87.9453	87.9315	87.8015	87.795	87.8175	87.7449	87.6683	87.6562	87.556	87.3481	87.3279	87.2914	87.076	87.2963	86.7962	86.652	86.4671	86.4249	86.3272	86.1797	86.2452	85.9529	85.7895	85.7118	85.7006	85.5942	85.6482	85.6721	85.4723	85.2333	85.337	85.3638
Sequence 52	45.6589	45.3781	45.2021	44.8402	44.5357	44.2959	44.0309	44.0056	43.6778	43.486	43.1983	43.1112	42.8459	42.4924	42.3634	42.0774	41.9899	41.8331	41.6559	41.5804	41.395	40.8322	40.5302	40.5605	40.2066	40.1067	39.6749	39.5386	39.3105	38.9884	38.9304	38.4444	38.5851	37.8323	37.8387	38.0538	37.7681	37.5713	37.199	36.9636	36.8066	36.508	36.348	36.1095	35.99	35.9731	35.8826	35.477	35.5367
Sequence 53	34.9703	34.6785	34.5635	34.4118	34.447	34.2608	34.1454	33.9363	33.9481	33.6568	33.635	33.4625	33.2895	33.3694	33.2544	33.0656	33.0768	33.1651	33.0257	32.6917	32.6474	32.2746	32.3135	32.0434	31.9628	31.7993	31.8416	31.7731	31.4108	31.3529	31.4632	30.9945	31.0929	30.9696	30.8323	30.7742	30.6095	30.3865	30.5411	30.1272	30.2409	30.0567	30.0834	29.9467	30.1345	30.0305	29.7968	29.6633	29.6654
Sequence 54	27.2748	27.0021	26.9363	26.9789	26.9091	26.9109	26.7636	26.7039	26.7978	26.7877	26.7882	26.8244	26.8539	26.7504	26.7238	26.6017	26.638	26.6328	26.624	26.6241	26.6468	26.6015	26.5815	26.6618	26.7029	26.8405	26.9343	26.9532	26.885	26.9806	27.0096	27.1069	27.2784	27.3153	27.3271	27.5127	27.5205	27.638	27.7681	27.7668	27.7129	27.7694	27.6132	27.7944	27.9322	27.7705	27.8039	28.0697	28.1102
Sequence 55	27.8746	27.7227	27.5742	27.4793	27.3082	27.2003	27.1508	27.0929	27.0879	26.8481	26.901	26.9438	26.5791	26.661	26.5068	26.3536	26.516	26.2913	26.4789	26.4105	26.3503	26.3199	26.2854	26.0722	26.0978	26.2629	26.1404	25.9661	25.9104	25.8512	25.7462	25.6824	25.6952	25.5657	25.4569	25.3385	25.4275	25.163	25.2721	25.2446	25.1274	25.4126	25.2706	25.5008	25.48	25.447	25.4551	25.6455	25.5699
Sequence 56	44.2349	44.2858	44.3479	44.0269	43.9374	43.8886	43.8677	43.3307	43.5939	43.5891	43.3613	43.3875	43.0847	43.1649	43.0471	42.7497	42.8267	42.7458	42.6685	42.4933	42.5517	42.2099	42.1735	42.1422	41.7804	41.7469	41.565	41.425	41.1821	41.1408	40.8145	40.7306	40.4627	40.1391	40.3508	40.2012	40.0772	39.8548	40.0514	39.8615	39.9388	39.7441	39.7057	39.6401	39.6577	39.5533	39.3746	39.2653	39.1826
Sequence 57	90.8328	90.7372	90.6716	90.5207	90.3637	90.5496	90.3632	90.2757	90.2309	90.1873	90.2792	90.1757	90.0998	90.1165	89.7915	90.1241	89.7535	89.7146	89.8416	89.8361	89.861	89.8669	90.2123	90.1124	90.3015	90.374	90.5489	90.5955	90.3945	90.5829	90.7319	90.8559	90.8234	90.7385	90.9385	91.1106	91.0144	91.1963	91.1833	91.368	91.4606	91.6726	91.6499	91.6393	91.8852	91.8472	91.8474	92.1289	92.3661
Sequence 58	64.9094	65.1894	65.1183	65.1196	65.2018	65.2363	65.2284	65.3247	65.2901	65.2582	65.2409	65.271	65.1905	65.1499	65.1384	65.1721	65.061	65.094	65.0395	65.0286	65.0627	65.0937	65.1149	65.1334	65.1315	65.1184	65.1062	65.122	65.1001	65.1039	65.1327	65.1458	65.1357	65.1511	65.1433	65.1045	65.0856	65.0881	65.0875	65.0675	65.0898	65.2091	65.0823	65.1739	65.1539	65.0896	65.3725	65.3895	65.3068
Sequence 59	52.6128	52.4542	52.318	52.2225	51.9835	51.9141	51.6932	51.5439	51.2986	51.2546	51.185	51.1591	50.8596	50.809	50.6303	50.5829	50.4136	50.2923	50.2705	50.1597	50.0588	50.0142	49.9012	49.7486	49.7001	49.5788	49.4053	49.2837	49.132	49.0538	48.8472	48.6972	48.4655	48.2605	48.1248	47.9195	47.7394	47.5636	47.3594	47.3551	47.1838	46.9475	46.8119	46.699	46.6409	46.3146	46.2746	46.2406	46.0859
Sequence 60	88.8526	88.6913	89.3581	89.0088	89.1593	89.0865	88.9036	89.1123	89.2922	89.3346	89.371	89.4207	89.4345	89.5379	89.4703	89.8386	89.7002	89.7287	89.6675	89.5837	89.8022	89.6288	89.9354	89.8211	89.8078	89.9307	89.9781	89.9772	90.0414	89.7484	89.9146	90.1445	90.2688	89.8418	90.1311	90.1149	90.0552	90.0898	90.0507	90.2307	90.1272	89.9185	89.4592	88.9224	89.9527	89.8911	89.4613	89.7028	89.5724
Sequence 61	44.4478	44.4792	44.5172	44.5493	44.5517	44.3794	44.4545	44.5519	44.4285	44.4285	44.338	44.4934	44.3149	44.4572	44.3932	44.5284	44.4293	44.3639	44.3356	44.2868	44.2032	44.2993	44.7645	44.3986	44.3764	44.4008	44.7762	44.4894	44.6539	44.5402	44.5541	44.6373	44.6978	44.6059	44.6919	44.9651	44.7154	44.7417	44.5103	44.7528	44.6591	44.8485	44.7359	44.6027	44.5145	44.6759	44.6526	44.6321	44.5429
Sequence 62	54.3395	54.2207	54.2553	54.2262	54.1297	53.9678	53.9862	54.0914	54.1318	54.0327	53.6663	53.8387	53.7908	53.8579	53.7436	53.4544	53.5794	53.5698	53.5506	53.4529	53.3555	53.554	53.4016	53.0628	53.2884	53.2516	53.2427	53.0707	52.8202	52.8338	52.7193	52.6483	52.5	52.5886	52.3959	52.2975	52.3594	52.4883	52.2549	52.1127	51.9006	51.9659	52.0706	52.0845	51.9977	51.9439	51.8478	51.8969	51.6665
Sequence 63	22.6695	22.4321	22.2672	22.0623	22.0118	21.8779	21.7544	21.5692	21.4303	21.3282	21.193	20.8834	21.1725	20.7697	20.6536	20.8399	20.8353	20.8585	20.8061	20.9843	21.037	20.9893	21.1029	21.118	21.1553	21.3065	21.1087	21.3992	21.3842	21.5204	21.4002	21.4167	21.2522	21.2335	21.193	20.9881	20.9723	20.9552	21.0491	21.0551	20.9844	21.0468	20.9046	20.9315	21.1467	21.2508	21.2109	21.2503	21.313
Sequence 64	54.4277	54.3196	54.4125	54.5324	54.4199	54.5122	54.2916	54.4736	54.2964	54.1351	54.2805	54.1184	53.9663	54.1208	53.8159	53.9903	53.8923	53.7681	53.7504	53.4516	53.4958	53.4477	53.6075	53.4281	53.2949	53.1524	52.9368	53.129	52.9976	52.5996	52.8832	52.4924	52.4901	52.7044	52.6413	52.4482	52.2378	52.4367	52.3621	52.4308	52.2319	52.1613	52.4572	52.2876	52.2296	52.1166	52.1255	52.2834	52.0094
Sequence 65	38.5063	38.5943	38.5351	38.1605	38.2144	38.1011	38.3567	38.1284	38.3082	38.4245	38.3576	38.4518	38.4256	38.4763	38.174	38.6841	38.2954	38.5474	38.5392	38.5755	38.4754	38.4205	38.3684	38.2263	38.2433	38.2767	38.4143	38.394	38.0393	37.9207	37.8174	38.0856	38.3089	38.0886	38.1288	37.8566	37.7164	37.8699	38.0028	37.9394	37.7425	37.701	37.6812	37.624	37.5523	37.4551	37.6626	37.6139	37.6175
Track	N =	15608
Time(s)	0.005	0.01	0.015	0.02	0.025	0.03	0.035	0.04	0.045	0.05	0.055	0.06	0.065	0.07	0.075	0.08	0.085	0.09	0.095	0.1	0.105	0.11	0.115	0.12	0.125	0.13	0.135	0.14	0.145	0.15	0.155	0.16	0.165	0.17	0.175	0.18	0.185	0.19	0.195	0.2	0.205	0.21	0.215	0.22	0.225	0.23	0.235	0.24	0.245
	Euc Dist (cm)
Sequence 1	22.9331	22.8295	22.9142	22.7556	22.7197	22.653	22.5567	22.6067	22.5416	22.4244	22.4527	22.431	22.3822	22.2376	22.133	22.2261	22.1015	21.959	22.0146	21.8778	21.7637	21.7661	21.7211	21.5916	21.5722	21.4689	21.4455	21.3847	21.3771	21.2962	21.2335	21.2247	21.0666	21.0895	21.111	21.0583	21.0177	20.8745	20.7609	20.754	20.5422	20.4742	20.4512	20.2624	20.1221	20.0573	20.0174	20.0342	19.9169
Sequence 2	37.615	37.349	37.386	36.9069	36.933	36.7989	36.4847	36.2692	36.2591	36.1003	36.0561	35.7076	35.6665	35.4993	35.3714	35.1649	35.1991	34.8926	34.9072	34.7141	34.4732	34.4049	34.5476	34.1574	34.0112	34.0469	33.9443	33.7637	33.5419	33.4538	33.4083	33.2988	33.0544	32.8863	32.6802	32.5464	32.4176	32.1682	32.0617	31.9693	31.8558	31.827	31.6946	31.5724	31.507	31.3805	31.034	31.081	30.9134
Sequence 3	24.8606	24.8209	24.8187	24.4702	24.4741	24.0531	24.0489	24.0482	24.0221	23.9254	23.8005	23.6881	23.6527	23.5327	23.4616	23.4366	23.2501	22.7956	22.7982	22.6435	22.391	22.4712	22.3084	22.2664	22.0691	21.9644	21.9607	21.9021	21.8131	21.6977	21.4154	21.4368	21.1051	20.9578	20.7308	20.4994	20.4197	20.254	20.1935	19.6956	19.6868	19.4746	19.3202	19.3186	19.1038	19.0763	19.0405	18.8784	18.7049
Sequence 4	22.9886	22.9236	22.8501	22.9572	22.7767	22.7794	22.6903	22.7171	22.5287	22.4251	22.3344	22.2774	22.2572	22.0359	22.0853	21.8359	21.9173	21.7232	21.672	21.6905	21.3669	21.3048	21.183	21.1074	20.9699	20.7633	20.8312	20.4877	20.333	20.3734	20.2889	19.9793	19.9081	19.8447	19.7942	19.5152	19.4835	19.2394	19.2019	19.1517	18.7556	18.6433	18.7335	18.3616	18.7038	18.6672	18.628	18.3688	18.2315
Sequence 5	51.0036	51.0039	51.0539	51.0078	50.8314	50.8362	50.8777	50.8061	50.7494	50.5986	50.5699	50.6096	50.5075	50.5187	50.3921	50.3285	50.3571	50.2791	50.0687	49.9497	49.9878	49.8766	49.7364	49.5921	49.4087	49.3534	49.1482	48.8914	49.1193	49.002	48.7341	48.753	48.5133	48.2682	48.1769	48.0913	47.9937	47.8459	47.7135	47.5772	47.5879	47.3737	47.162	47.0812	47.056	46.89	46.9193	46.5866	46.5222
Sequence 6	31.3609	31.1146	30.8658	30.521	30.2054	30.0034	29.6872	29.2766	28.8117	28.6377	28.1332	27.7769	27.4313	27.2232	26.8212	26.6053	26.1893	25.8123	25.3162	24.9101	24.4846	24.0607	23.5725	23.1665	22.8019	22.3526	22.1585	21.7704	21.1283	20.6929	20.3426	19.966	19.6636	19.0534	18.7014	18.3693	17.8624	17.7938	17.3475	17.2632	16.8864	16.2223	16.1842	16.0051	15.544	15.3842	15.1746	14.8875	14.7141
Sequence 7	40.2653	39.9418	39.8241	39.858	39.7799	39.6757	39.5633	39.5439	39.5829	39.1916	39.1844	39.1749	38.9331	38.8711	38.6529	38.6731	38.48	38.4902	38.229	38.1947	37.9505	37.9447	37.8508	37.6321	37.5041	37.1501	37.2643	36.5537	37.0894	37.6569	36.7313	36.6105	36.4409	36.2769	36.1527	36.0668	35.8457	35.7491	35.5651	35.4169	35.1043	35.0709	34.8799	34.6933	34.4274	34.2563	34.1841	34.0362	33.7322
Sequence 8	24.6528	24.5418	24.5661	24.4878	24.3113	24.406	24.211	24.1931	24.1399	24.0746	23.9627	23.7494	23.3773	23.3766	23.2857	23.189	23.064	23.1315	22.8672	22.8069	22.9235	22.8807	22.6472	22.9096	22.6097	22.384	22.029	21.9454	21.7168	21.5134	21.1631	20.8049	20.4949	20.556	20.2566	19.7353	19.5281	19.5378	19.2643	18.8143	18.4959	18.277	18.0883	17.8201	17.7234	17.5905	17.2862	16.8557	16.6549
Sequence 9	31.9715	31.8959	31.7091	31.7911	31.5634	31.4144	31.3385	31.0725	31.2374	30.8636	30.818	30.6393	30.7678	30.8027	30.5908	30.7434	30.6168	30.4353	30.3583	30.2412	30.3328	30.2197	30.2028	29.8607	30.0863	29.7046	29.7472	29.4539	29.4864	29.3918	29.4144	29.3171	29.3565	29.187	28.8198	28.8159	28.7797	28.7291	28.4611	28.4866	28.4835	28.269	28.1667	28.3251	28.1976	28.143	28.1162	28.004	27.8425
Sequence 10	38.8535	38.7384	38.6545	38.4525	38.5761	38.2428	38.2364	38.0636	37.8805	37.82	37.5619	37.6082	37.4418	37.2809	37.2072	37.0424	36.8871	36.7415	36.5378	36.3563	36.1714	35.7835	35.7243	35.5677	35.3147	35.0666	34.7344	34.6322	34.3058	34.1332	33.8324	33.732	33.4105	33.2058	32.8743	32.7121	32.5116	32.5492	32.1764	32.255	31.9233	31.7095	31.5709	31.1461	31.0237	30.783	30.6377	30.4702	30.273
Sequence 11	28.1479	28.216	28.1899	27.8762	27.9031	27.8377	27.9568	27.5204	27.3856	27.4037	27.2044	26.9868	26.8423	26.7421	26.4908	26.2991	26.0993	26.018	25.8395	25.6375	25.6027	25.5603	25.3686	25.2103	25.1648	24.9968	24.9522	24.8201	24.5924	24.519	24.351	24.2489	23.9184	23.8595	23.6869	23.5112	23.3068	23.1165	23.0013	22.73	22.7321	22.4426	22.3776	22.0692	21.8574	21.6108	21.4435	21.0933	21.0773
Sequence 12	44.0845	44.011	43.9735	43.8422	43.9534	43.9003	43.9235	43.9804	43.8169	43.7473	43.7906	43.6615	43.6468	43.542	43.5414	43.4749	43.3683	43.1763	43.2439	43.1831	43.1075	42.862	42.7488	42.6282	42.6063	42.3377	42.0938	41.9904	41.8084	41.6528	41.5019	41.454	41.2205	41.0383	40.8371	40.6376	40.5244	40.2968	40.0207	40.192	39.9133	39.6306	39.493	39.4061	39.2148	39.0564	38.9565	38.901	38.6047
Sequence 13	28.289	28.3109	28.1978	28.0294	27.9519	27.8532	27.8384	27.7333	27.4151	27.2404	27.1747	26.8926	26.7042	26.5217	26.3294	26.2223	25.8989	25.9529	25.5761	25.6894	25.5111	25.3863	25.1596	25.1179	24.9265	24.8565	24.7685	24.6109	24.634	24.5987	24.3486	24.105	23.8832	23.7219	23.6402	23.6487	23.2232	23.1097	23.2046	22.7987	22.6081	22.475	22.1757	22.218	21.943	21.8508	21.5741	21.3436	21.2311
Sequence 14	47.1642	47.1991	47.2721	47.0392	46.8136	46.9613	46.9236	47.0012	46.8463	46.7942	47.2388	46.9958	46.868	47.0154	46.8054	46.7451	46.7327	46.6198	46.4514	46.3846	46.1974	46.0936	45.9341	45.7503	45.5649	45.6574	45.365	45.0477	45.0966	44.9257	44.6493	44.5297	44.4587	44.3088	43.9785	44.055	43.8423	43.7668	43.5256	43.1956	43.1336	42.9518	42.7557	42.6268	42.3656	41.9968	41.7174	41.6571	41.4048
Sequence 15	31.3996	31.3679	31.4173	31.4676	31.3651	31.2325	31.1673	31.2258	30.8644	30.8624	30.7312	30.7026	30.6426	30.3541	30.0121	30.01	29.8533	29.687	29.3908	29.5712	29.2644	29.0529	28.7809	29.0495	28.7093	28.5272	28.5799	28.3912	28.3416	28.084	28.0732	27.8068	27.5327	27.4445	27.3517	27.0681	26.8355	26.7402	26.5633	26.1942	26.1547	26.0579	25.9136	25.6387	25.452	25.3881	25.1761	25.1356	24.8442
Sequence 16	24.717	24.502	24.152	24.4175	24.1706	24.1534	24.1798	24.1928	24.202	23.9391	23.9456	23.8901	23.7891	23.6522	23.5658	23.5139	23.4811	23.2447	23.3951	23.3576	23.2172	23.1169	23.0313	22.7728	22.827	22.8096	22.6397	22.5263	22.5256	22.4364	22.3709	22.0773	22.1648	21.9714	21.9163	21.8099	21.5754	21.5503	21.3876	21.3121	21.1581	20.9829	21.1053	20.9207	20.896	20.7829	20.7291	20.6041	20.6032
Sequence 17	67.1583	66.9533	66.8116	66.8737	66.5854	66.1736	65.9714	65.7242	65.6826	65.2252	65.3209	65.0685	64.9417	64.6669	64.5797	64.3722	64.2615	64.1139	63.8334	63.5299	63.603	63.3837	63.3232	63.048	62.995	62.8676	62.6832	62.4543	62.2996	62.1219	61.9801	61.851	61.6341	61.4834	61.3201	61.2361	61.0324	60.7509	60.6582	60.7206	60.3772	60.4312	60.1632	59.9707	59.9085	59.6732	59.5299	59.1917	59.0997
Sequence 18	91.9273	91.7169	91.3434	91.1847	91.3289	90.9891	90.8743	90.8468	90.5832	90.4972	90.3742	90.2946	90.1673	90.0168	89.8505	89.8118	89.7235	89.5898	89.3315	89.4043	89.1384	88.991	88.9159	88.6917	88.56	88.5589	88.35	88.3056	88.1969	88.0709	87.9495	87.8085	87.5607	87.4723	87.5386	87.3065	87.2171	87.088	87.0145	86.8262	86.7107	86.7307	86.4757	86.3812	86.1757	86.0831	85.9677	85.7399	85.5983
Sequence 19	34.535	34.3504	34.3729	34.3997	34.2911	34.4405	34.2461	34.052	33.9029	33.8926	33.5301	33.6551	33.4333	33.1539	33.2066	32.8735	32.9674	32.7712	32.7306	32.6416	32.5594	32.491	32.438	32.4146	32.3397	32.3752	32.1157	31.9137	31.7479	31.664	31.6529	31.5222	31.2774	31.2516	31.0733	30.958	30.6961	30.6949	30.6708	30.3544	30.359	30.3415	30.1899	30.0448	29.9394	29.9293	29.8015	29.8583	29.9706
Sequence 20	20.4563	20.3912	20.423	20.342	20.3708	20.3848	20.1971	20.2215	20.3473	20.0482	20.161	19.8471	19.7575	19.8486	19.4385	19.3472	19.3291	19.2925	18.9416	18.9045	18.7962	18.853	18.5343	18.4321	18.2965	18.0639	17.6848	17.4312	17.4539	17.1202	16.9733	16.7172	16.4619	16.2315	16.1371	15.8504	15.809	15.6331	15.8317	15.5596	15.3746	15.0107	15.0289	14.8311	14.8246	14.626	14.5104	14.211	13.9574
Sequence 21	26.3628	26.036	25.616	25.6046	25.3077	25.0331	24.6705	24.0503	23.9897	23.5277	23.0425	22.8253	22.4597	21.9682	21.6907	21.2338	20.8321	20.3538	19.85	19.3952	19.0497	18.3637	17.9449	17.8269	17.2083	16.7358	16.3473	15.9029	15.5744	15.3596	14.8488	14.5065	14.1791	13.7692	13.3874	13.1619	12.7034	12.4267	12.2682	11.9326	11.7535	11.6884	11.4855	11.2634	11.1221	11.0037	10.685	10.4568	10.3536
Sequence 22	41.6341	41.5077	41.4718	41.261	41.1236	41.0542	40.9887	41.0042	40.7292	40.7252	40.6352	40.632	40.4289	40.3338	40.1467	40.0404	40.0211	39.9904	39.8216	39.7092	39.7439	39.7419	39.644	39.5156	39.3343	39.1185	39.0335	38.9399	38.8492	38.6991	38.51	38.3395	38.1667	37.8783	37.9213	37.6902	37.5996	37.404	37.0893	36.9508	36.9218	36.7869	36.8789	36.7454	36.4542	36.4426	36.4141	36.3493	36.0583
Sequence 23	69.6255	69.5301	69.4108	69.3758	69.1608	69.2344	69.168	68.9451	68.8756	68.7007	68.5739	68.4947	68.271	68.2146	68.0918	67.8983	67.718	67.6855	67.5018	67.418	67.1757	67.1188	66.8895	66.6961	66.538	66.411	66.3032	66.0972	65.9811	65.8191	65.4315	65.0512	64.877	64.9322	64.6607	64.5655	64.2881	64.1434	64.1083	63.7033	63.4862	63.2419	63.0283	62.966	62.5699	62.305	62.0347	62.061	61.5089
Sequence 24	29.0098	28.8502	28.7509	28.7305	28.3912	28.296	28.1492	27.9325	27.8112	27.5519	27.6422	27.4408	27.2859	27.2679	27.0542	26.9629	26.9595	27.0148	26.8241	26.9574	26.8245	26.7726	26.8173	26.5405	26.6245	26.3795	26.3507	26.2146	26.0541	26.0829	26.0269	25.85	25.8211	25.945	25.8678	25.8172	25.7859	25.8516	25.688	25.5946	25.5194	25.4272	25.3797	25.1109	25.1302	24.8026	24.8375	24.6576	24.6321
Sequence 25	68.9667	68.8986	68.7608	68.521	68.5021	68.3326	68.1725	67.8473	67.9644	67.8816	67.6909	67.6611	67.4138	67.182	67.1568	67.0208	67.0327	66.8761	66.6486	66.4622	66.4567	66.3651	66.1572	65.8154	65.7957	65.7695	65.4849	65.1372	65.1093	64.8241	64.8782	64.9471	64.6939	64.7524	64.75	64.4756	64.3442	64.3994	64.4422	64.2347	64.2798	64.2786	64.2623	64.1812	63.9795	63.9263	63.9721	63.9086	63.8142
Sequence 26	28.7925	28.8702	28.8918	28.71	28.6244	28.4693	28.5845	28.4631	28.456	28.2797	28.2927	28.1566	28.2398	28.0799	27.9606	28.0288	27.7408	27.9142	27.6874	27.7226	27.6581	27.5505	27.5445	27.3844	27.0756	27.2249	27.0697	26.942	26.9507	26.8804	26.854	26.8868	26.7349	26.6303	26.5648	26.6073	26.3887	26.3088	26.5359	26.3964	26.0618	25.9574	25.6908	25.5322	25.4114	25.5184	25.353	25.1502	24.9149
Sequence 27	28.8457	28.838	28.8755	28.8156	28.5137	28.6717	28.6457	28.399	28.2629	28.4	28.4184	28.3648	28.2717	28.3244	28.2173	28.1804	28.2135	28.0262	28.0022	27.982	27.898	27.7856	27.7795	27.5991	27.1498	27.2365	26.9802	27.2899	27.1606	27.2004	27.371	27.055	26.8389	26.6429	26.5399	26.6527	26.3367	26.3578	26.4679	26.1588	25.9319	25.9099	26.1263	25.7368	25.6651	25.5043	25.4135	25.2185	25.0723
Sequence 28	33.9245	33.8293	33.9108	33.8975	33.974	34.0047	33.7829	33.3675	33.5698	33.2119	33.0564	32.9661	32.8162	32.8036	32.7436	32.4035	32.1765	32.0637	31.7279	31.6392	31.5823	31.4508	31.1126	30.9935	30.884	30.6421	30.383	30.2979	30.2915	30.0388	29.9139	29.7838	29.602	29.4181	29.1995	29.076	28.8007	28.75	28.5202	28.4439	28.3217	28.2833	28.1615	27.8881	27.5291	27.3548	27.3414	27.1419	26.8769
Sequence 29	30.7528	30.6359	30.6779	30.6399	30.5144	30.3966	30.1408	30.0177	30.0412	29.8926	29.9623	29.5474	29.3991	29.3986	29.1886	28.7638	28.7014	28.5478	28.3693	28.1837	28.1326	27.6941	27.497	27.5573	27.1296	26.9449	26.8649	26.5633	26.3743	26.1799	25.9985	25.759	25.5734	25.3267	25.252	25.051	24.9201	24.8409	24.6011	24.4449	24.2616	24.1778	24.4203	23.973	23.8794	23.6171	23.4739	23.2951	23.1755
Sequence 30	47.2401	47.1882	47.1788	47.1991	46.9289	46.7889	46.7088	46.6378	46.4969	46.6511	46.3788	46.2778	46.159	46.0516	46.1348	45.8223	45.7997	45.6752	45.4843	45.4004	45.3028	45.2692	44.9027	45.2236	45.152	45.0699	45.0313	44.8758	44.8479	44.815	44.6872	44.5957	44.4576	44.3204	44.2101	44.1181	43.9968	43.8248	43.6908	43.6367	43.4364	43.5143	43.2223	43.0512	42.9198	42.7796	42.4426	42.439	42.3286
Sequence 31	74.9658	74.7584	74.4798	74.621	74.4885	74.432	74.2203	74.0762	73.9478	73.7068	73.5632	73.4893	73.2284	73.1268	73.0667	72.8339	72.6779	72.5725	72.2946	72.254	72.0046	72.0031	71.77	71.7847	71.5589	71.3815	71.1604	70.9234	70.8908	70.633	70.5697	70.2879	70.323	70.0608	69.7978	69.6965	69.5211	69.3464	69.1981	68.9774	68.8407	68.6133	68.4816	68.2569	68.0342	67.649	67.5291	67.3133	67.0347
Sequence 32	48.4496	48.3234	48.2531	47.8851	47.8571	47.7974	47.486	47.3464	47.044	46.8842	46.7095	46.4751	46.2486	46.0327	45.6741	45.622	45.3712	44.9401	44.6053	44.2397	43.8203	43.6642	43.3992	43.1884	42.7893	42.2371	42.0671	41.567	41.2525	41.037	40.8155	40.4379	39.9281	39.8706	39.3318	39.0801	38.6726	38.4208	37.9428	37.7272	37.0812	36.8335	36.3837	36.3124	36.015	35.7686	35.3643	34.9759	34.8578
Sequence 33	24.3876	24.3053	24.281	24.0685	24.1341	23.8405	23.6733	23.5563	22.9447	22.8296	22.6583	22.6503	22.2515	22.0089	22.0512	22.5013	22.4357	21.8308	22.0854	21.8636	21.6451	21.6308	21.3683	21.4247	21.1947	21.1219	21.0047	20.8665	20.6744	20.5928	20.5015	20.3636	20.3347	20.2557	19.952	19.9634	19.9373	19.6545	19.7042	19.3944	19.2843	19.1961	19.1144	19.1084	19.1737	18.9687	19.039	18.8835	18.8208
Sequence 34	34.1478	33.6168	33.6841	33.5202	33.3726	33.185	32.9831	32.5434	32.5544	32.0642	31.9611	31.8387	31.529	31.3421	31.3523	31.0045	30.9449	30.6684	30.3273	30.5194	30.3897	29.8992	29.5431	29.5127	29.3864	29.2055	28.9284	28.5541	28.6141	28.2078	27.975	27.6942	27.6846	27.3495	27.3992	27.1079	26.9403	26.8081	26.752	26.605	26.127	26.4352	25.9838	25.7841	25.8042	25.9197	25.5514	25.3908	25.5377
Sequence 35	35.4354	35.3534	35.4375	34.7881	34.7988	34.8624	34.5131	34.1998	34.0377	33.8741	33.7502	33.479	33.5302	33.0434	33.0604	32.7833	32.575	32.3187	32.0613	32.0799	31.8893	31.7544	31.4411	31.2219	31.0485	31.0012	30.9315	30.4765	30.3002	29.9063	29.6947	29.4452	29.1307	28.8988	28.7083	28.476	28.2616	28.2153	27.8593	27.5681	27.4304	27.1352	27.063	26.7477	26.4505	26.2992	26.037	25.6227	25.616
Sequence 36	72.3506	72.1891	72.2703	72.3548	72.2181	72.1996	71.9917	72.0199	71.9568	72.018	72.0254	72.0544	71.55	71.6163	71.5127	71.5388	71.4224	71.3413	71.156	71.3166	70.9314	71.1351	70.9636	70.9804	70.9128	70.7048	70.6022	70.4873	70.389	70.2395	70.149	70.1121	70.0722	69.8689	69.6606	69.5407	69.3869	69.1137	69.0815	68.7559	68.6041	68.4532	68.1807	68.1362	67.8573	67.8161	67.4934	67.4789	67.1476
Sequence 37	35.9451	35.772	35.8148	35.8855	35.8449	35.6579	35.6564	35.7783	35.6237	35.5925	35.3834	35.4642	35.4835	35.4019	35.1546	35.114	35.239	35.0054	34.9768	35.0964	35.0458	34.9419	35.1217	34.8667	34.9599	35.3225	35.3304	34.8968	34.9501	34.565	34.5033	34.5085	34.4953	34.5547	34.2629	34.0867	34.0515	33.9134	34.0274	33.9075	33.4738	33.6572	33.3848	33.059	32.9546	32.8176	32.8073	32.6116	32.1461
Sequence 38	54.5858	54.6675	54.3053	54.3119	54.1398	53.9741	53.7806	53.5956	53.6829	53.4661	53.5736	53.2587	53.2293	53.2448	53.1987	53.1736	53.065	52.9977	52.8615	53.0102	52.5806	52.6775	52.3045	52.3249	52.1676	51.8658	51.9887	51.5883	51.598	51.5602	51.3077	51.2146	51.0637	50.9115	51.0407	50.8336	50.74	50.7162	50.5938	50.3544	50.456	50.0592	49.9187	49.8645	49.6895	49.6516	49.5388	49.484	49.2996
Sequence 39	26.3131	26.1424	26.0444	25.921	25.9319	25.7536	25.6127	25.3897	25.3287	25.2117	24.9392	24.9079	24.7141	24.414	24.3065	24.228	23.9933	23.9046	23.8558	23.5894	23.4038	23.3176	23.1784	22.9488	22.9513	22.6028	22.5904	22.4328	22.2395	22.3742	22.1543	22.192	22.0039	22.0793	21.9496	21.8194	21.6575	21.7338	21.6646	21.4416	21.4936	21.108	21.25	21.1583	21.1288	21.0865	20.7316	20.9498	20.8099
Sequence 40	45.8831	45.643	45.6272	45.5486	45.4032	45.2037	44.9885	44.9139	45.1727	44.9011	44.7238	44.5095	44.6426	44.3017	44.3252	43.9946	43.972	43.7474	43.7476	43.7879	43.6174	43.4575	43.2948	43.1905	43.0515	42.9886	42.6633	42.597	42.3425	42.311	42.0342	41.8009	41.6255	41.5123	41.4388	41.0261	41.041	40.8606	40.47	40.4665	40.2677	40.1322	39.876	39.4952	39.4512	39.0917	38.9436	38.722	38.4258
Sequence 41	44.5742	44.3867	44.2647	44.189	44.0901	43.8916	43.5485	43.3657	43.2979	43.1082	42.8411	42.7068	42.5405	42.4273	42.2708	41.9384	41.8322	41.5563	41.2543	41.2615	40.9442	40.7796	40.5983	40.596	40.3424	40.0711	39.9479	39.6607	39.3473	39.385	39.1165	38.9745	38.671	38.354	37.9581	38.042	37.9216	37.6687	37.523	37.3604	37.0144	36.8249	36.7042	36.4534	36.2314	36.0118	35.8546	35.7115	35.6043
Sequence 42	41.0383	40.8528	40.6673	40.6385	40.6203	40.7352	40.2796	40.3088	40.2587	40.1124	39.9463	39.9428	39.7275	39.7623	39.6086	39.2415	38.97	39.2141	38.9023	38.5987	38.65	38.5648	38.2179	38.0872	37.7894	37.4618	37.4213	37.1587	36.9468	36.7643	36.5892	36.2677	36.1185	36.0548	35.9153	35.8676	35.5936	35.6074	35.3523	34.9909	34.9387	34.7377	34.5079	34.4193	34.2944	34.0385	33.9743	33.7268	33.6313
Sequence 43	61.2492	61.1894	60.9945	60.935	60.9594	60.9194	60.7708	60.6671	60.8447	60.7719	60.7781	60.5884	60.4316	60.4987	60.4502	60.5734	60.2187	60.0068	59.9781	59.9487	59.6776	59.5442	59.5091	59.3918	59.1402	59.1102	58.9865	58.8989	58.8291	58.6662	58.3874	58.2095	58.225	57.9522	57.8733	57.7449	57.463	57.2602	57.0233	56.9446	56.7783	56.633	56.4014	56.1334	56.0087	55.8804	55.7697	55.5517	55.3865
Sequence 44	30.1954	30.0133	29.9655	29.7184	29.4328	29.3546	29.3565	29.1326	28.8318	28.8495	28.808	28.4606	28.3516	28.2047	27.7012	27.6715	27.5501	27.62	27.38	26.9092	26.5348	26.4604	26.3912	26.104	25.8923	26.0502	25.2938	25.3042	24.9952	24.7809	24.7771	24.41	24.3515	23.9402	24.0203	23.456	23.3566	23.3476	23.2274	22.9244	22.6537	22.4893	22.6221	22.3508	22.1015	21.8856	21.8716	21.6879	21.3581
Sequence 45	29.559	29.2029	29.1505	29.2116	28.728	28.6979	28.6409	28.4585	28.3591	28.0566	27.7719	27.6954	27.6186	27.2118	27.2158	26.8734	26.6838	26.3867	26.1046	25.8516	25.8985	25.6465	25.391	25.1663	24.8708	24.627	24.3664	24.3178	24.2047	23.9007	23.5437	23.3047	23.245	23.3001	23.2042	22.9226	22.8025	22.6582	22.4269	22.414	22.0857	22.0332	21.7295	21.7174	21.705	21.3527	21.2785	21.3835	21.2564
Sequence 46	53.8687	53.8794	53.7653	53.9983	53.7727	53.8039	53.5413	53.5733	53.5205	53.5446	53.5038	53.3057	53.3568	53.2395	53.1037	53.021	53.1425	53.0017	52.7941	52.8856	52.7117	52.6337	52.4235	52.4064	52.3493	52.3599	52.3594	52.2412	52.1518	51.9679	52.0436	51.9617	51.8896	52.0096	51.902	51.8184	51.6658	51.7785	51.5536	51.5838	51.4379	51.3712	51.1663	51.234	51.2151	51.1635	50.9146	50.8298	50.6919
Sequence 47	47.8701	47.6619	47.4721	47.6665	47.4167	47.3517	47.1561	47.15	47.1454	46.8328	46.7121	46.8246	46.753	46.4378	46.569	46.3513	46.2312	46.2107	46.5859	46.1635	46.0955	46.1085	46.2746	46.2745	45.8353	45.9382	45.8674	45.6473	45.6268	45.5796	45.5015	45.3957	45.434	45.3071	45.327	45.1532	45.2796	45.2016	45.1279	44.9044	44.8633	44.963	44.8329	44.6074	44.6458	44.4457	44.5206	44.467	44.404
Sequence 48	48.8907	48.8589	48.6168	48.6684	48.6881	48.0935	48.3126	48.0916	47.8263	47.8366	47.7963	47.7697	47.398	47.1095	47.0998	46.6327	46.7624	46.3274	46.4407	46.0153	45.8349	45.7189	45.4302	45.1507	44.8407	44.746	44.2422	44.6131	44.1041	43.9666	43.3124	43.4263	42.6958	42.8748	42.6961	42.52	42.7263	42.5287	42.7345	42.4834	41.944	41.8887	41.8565	41.2536	41.0349	41.4354	40.8039	40.7435	39.9818
Sequence 49	46.4253	46.3353	46.2136	46.0268	45.8016	45.8234	45.6775	45.6221	45.5897	45.4076	45.3572	45.4017	45.0253	45.0685	45.0188	44.9169	44.8929	44.7273	44.5828	44.5312	44.4205	44.4243	44.5204	44.5449	44.3293	44.4322	44.3301	44.3176	44.1515	44.2931	44.0165	43.8208	43.9538	43.8317	43.8416	43.7009	43.4951	43.5777	43.4157	43.2102	43.1528	42.9749	42.9896	43.1592	42.7018	42.7367	42.7206	42.7724	42.5124
Sequence 50	35.9998	35.8556	36.1942	35.9275	35.7984	35.9353	35.8883	36.135	35.8458	36.0592	35.8018	35.6674	35.5724	35.485	35.5416	35.2891	35.4184	35.5634	35.4225	35.2696	35.3108	35.358	35.2433	35.2794	35.1049	35.0192	35.1741	35.0066	34.851	34.9185	34.922	34.6738	34.6143	34.6528	34.7656	34.2738	34.1734	34.3929	34.0955	33.9405	33.9346	34.0449	33.7374	33.7154	33.5219	33.4201	33.1332	33.0562	32.7629
Sequence 51	84.0706	83.7728	84.3117	83.8403	84.1762	83.8613	83.7633	83.3643	83.4986	83.5268	83.2226	83.2593	83.4643	83.31	82.9945	82.8489	82.9193	82.7502	82.6376	82.3908	82.2651	82.2475	82.1918	81.8603	81.6347	81.3933	81.1485	81.0348	80.8936	80.617	80.8746	80.7604	80.1547	80.2047	80.4639	79.7212	80.0233	79.5089	79.554	79.0414	78.919	78.2066	78.2905	78.2256	78.425	78.2411	78.2668	78.044	77.674
Sequence 52	31.1317	30.8356	30.5552	30.3771	30.3343	30.0703	29.8031	29.7035	29.6773	29.131	29.0556	29.0013	28.734	28.4288	28.2131	27.9822	27.9412	27.883	27.3498	27.415	27.4118	27.0922	26.9911	26.6513	26.8023	26.4535	26.2355	25.9449	26.1753	25.6019	25.351	25.5043	25.1058	24.884	24.7711	24.6383	24.1331	24.1222	23.9383	23.5407	23.0881	23.1926	22.836	22.642	22.4108	22.2627	21.9554	21.7949	21.4399
Sequence 53	26.5586	26.3575	26.4913	26.3583	26.4302	26.1411	26.2591	26.0625	25.9567	25.8532	25.8559	25.6568	25.5413	25.4808	25.4204	25.2372	24.9982	24.7803	24.5305	24.5502	24.4222	24.0293	23.8691	23.8606	23.6402	23.2759	23.2693	23.1198	22.9368	22.7148	22.5425	22.3541	22.2691	22.0274	21.8707	21.6497	21.5363	21.2896	21.125	20.892	20.6186	20.4467	20.2742	20.0076	19.8958	19.6624	19.4706	19.4603	19.159
Sequence 54	27.8331	27.6934	27.5568	27.7862	27.6988	27.6321	27.3461	27.2664	27.3251	27.2217	27.2012	27.0113	26.927	26.7704	26.6475	26.44	26.3137	26.4439	26.2983	26.0243	25.9367	25.8473	25.8314	25.5353	25.3478	25.0713	24.7454	24.8865	24.5803	24.4861	24.2732	23.9656	23.8451	23.8431	23.5185	23.3426	23.2676	23.2299	23.0242	22.8615	22.6182	22.4286	22.2982	22.2804	21.9277	21.8931	21.6139	21.4585	21.3206
Sequence 55	25.7884	25.5362	25.4434	25.2699	25.2449	24.9062	24.7621	24.6315	24.453	24.303	24.2791	24.0568	24.0395	23.9145	23.6696	23.6296	23.4276	23.2566	23.1077	23.1665	22.8549	22.6924	22.5506	22.4496	22.3338	22.3314	22.0874	21.753	21.7329	21.5721	21.4425	21.3103	21.085	20.9711	20.8983	20.7902	20.6606	20.5287	20.3621	20.1031	20.0298	19.8886	19.6836	19.6258	19.428	19.2375	19.0395	18.9944	18.7672
Sequence 56	35.8934	35.7384	35.8328	35.8693	35.6235	35.6382	35.556	35.6027	35.4106	35.3021	35.3716	35.2484	35.2376	35.1511	35.213	35.0164	34.9105	34.9724	34.7415	35.0456	35.1103	34.6841	34.8658	34.8081	34.5671	34.6231	34.6513	34.3778	34.6588	34.4636	34.2741	34.2098	34.1234	34.1439	33.995	34.1994	34.0634	33.8461	33.8673	33.8539	33.5795	33.6228	33.662	33.417	33.3994	33.2121	33.1426	33.1189	32.9383
Sequence 57	94.6323	94.5249	94.6296	94.3766	94.3545	94.2347	93.9937	94.0811	94.0601	93.7098	93.8928	93.7095	93.5377	93.3343	93.3493	93.2684	93.1495	92.953	92.8935	92.6694	92.7714	92.7678	92.6572	92.66	92.4865	92.4294	92.3902	92.376	92.3422	92.2604	92.1714	92.1269	91.9455	91.8998	91.9371	91.8686	91.7797	91.563	91.4802	91.4598	91.4149	91.584	91.396	91.3877	91.3039	91.2097	91.2324	91.18	91.1396
Sequence 58	61.1337	60.5677	60.9782	60.9831	60.833	60.8927	60.8844	60.6533	60.5245	60.465	60.2776	60.5238	60.2716	60.4471	60.2816	60.4386	60.1727	60.357	60.0498	60.1856	60.0941	59.9791	59.6216	59.7691	59.462	59.6433	59.8466	59.4825	59.0983	59.1421	59.1522	58.7147	58.9405	59.1195	58.6324	58.6998	58.5485	58.319	58.0178	58.1802	57.7645	57.6758	57.9388	57.6744	57.615	57.5198	56.9993	57.1092	57.2505
Sequence 59	39.0928	38.9969	38.9472	38.8675	38.7018	38.6276	38.3944	38.1449	38.1738	37.9838	37.9133	37.8498	37.7241	37.6177	37.4225	37.3652	37.2103	36.936	36.8783	36.6671	36.5635	36.3827	36.304	36.0389	35.8438	35.7251	35.5796	35.4703	35.2209	35.0583	35.0007	34.9625	34.6367	34.5724	34.5562	34.3851	34.2691	34.0821	33.9396	33.9414	33.604	33.4956	33.3898	33.2323	32.9649	32.9091	32.8343	32.7886	32.6738
Sequence 60	86.7441	86.8002	86.6567	86.515	86.1467	86.3183	86.1635	86.0044	86.2778	85.8871	85.9267	85.5525	85.8124	85.6474	85.4537	85.3739	85.2411	85.1943	84.8591	85.1032	84.8895	84.6201	84.3753	84.5572	84.3914	84.351	84.2827	84.2343	84.0818	83.9082	83.8329	83.7551	83.6849	83.5909	83.2627	83.2441	82.9292	83.0561	82.9992	82.7718	82.5715	82.3712	82.2188	82.2087	81.5715	81.7485	81.4398	81.3264	81.0988
Sequence 61	41.7052	41.4412	41.4063	41.4909	41.4635	41.045	41.115	40.9699	41.0177	40.8738	40.8749	40.6971	40.3741	40.4238	39.9448	39.8185	39.8436	39.5065	39.53	39.4808	39.2322	39.1502	39.0734	39.0129	38.8717	38.7005	38.7849	38.3246	38.3849	38.3876	38.1487	38.2409	38.2057	37.9608	38.01	37.9481	38.0374	37.9107	37.7817	37.6826	37.7168	37.8522	37.5601	37.2455	37.0887	37.0765	36.9744	36.7333	36.4666
Sequence 62	49.7926	49.6931	49.403	49.6449	49.5285	49.4382	49.0755	49.4239	49.3655	49.2897	49.2132	48.9571	49.0675	49.0441	48.8675	48.9256	48.6531	48.6241	48.5275	48.327	48.4448	48.4141	48.3198	48.2023	48.021	47.9481	47.9006	47.7001	47.8128	47.4557	47.3296	47.2421	47.1015	46.9653	46.9956	46.557	46.6173	46.4301	46.3906	45.997	45.87	45.9266	45.6639	45.5235	45.8274	45.7333	45.4885	45.1778	45.0595
Sequence 63	20.2601	20.3621	20.4408	20.2972	20.094	20.0384	19.9673	19.9722	19.7075	19.5446	19.3397	19.3293	19.2229	18.9886	19.0481	18.7034	18.5082	18.3753	18.3742	18.208	18.0732	18.0465	17.6402	17.6186	17.6374	17.5601	17.3213	16.9319	17.0305	16.885	16.8617	16.5768	16.6965	16.458	16.1585	16.2971	15.7283	15.8378	15.5656	15.348	15.3882	15.0522	14.8894	15.067	14.7042	14.5663	14.5444	14.1888	13.8135
Sequence 64	49.9885	49.8755	49.6848	49.6222	49.458	49.6133	49.3915	49.3709	49.2074	49.195	49.2372	48.9722	48.9157	48.8997	48.9443	48.6555	48.6777	48.6935	48.4746	48.6727	48.3183	48.2924	48.3882	48.384	48.1887	48.1642	47.9913	48.0686	47.8495	47.8215	47.6516	47.6435	47.5697	47.4423	47.3611	47.2367	47.2418	47.1373	47.0953	46.9151	47.1755	46.9486	47.0127	46.9058	46.8911	46.6563	46.6457	46.6255	46.5235
Sequence 65	35.5344	35.0993	35.0922	35.1876	35.0652	35.1317	35.0954	34.9901	34.6643	34.4606	34.7416	34.2952	34.5408	34.6066	34.1916	34.1906	33.739	34.0659	34.0002	33.9398	33.8938	33.6031	33.8426	33.9412	33.7391	33.8199	33.6584	33.5614	33.3942	33.6668	33.3683	33.2039	33.5436	33.37	33.0945	33.4102	33.2328	33.3183	33.0718	32.983	33.1327	33.0328	32.8628	32.6127	32.8623	32.8119	32.7525	32.391	32.3684
[truncated: 670 more columns]

## Sheet: 2D
Target Bearing (Deg)									Target Bearing (Deg)
Detect									Track
	Mouse 1	Mouse 2	Mouse 3	N	Centers	P	SD			Mouse 1	Mouse 2	Mouse 3	N	Centers	P	SD
	16.604	-101.289	19.9988	4406	-177.5	0	0			38.8492	26.3845	35.5953	13624	-177.5	0	0
	16.3682	-100.051	18.7694		-172.5	0	0			38.3336	26.4865	35.3744		-172.5	0	0
	16.2449	-100.028	16.4582		-167.5	0	0			38.1395	27.2644	34.6993		-167.5	0	0
	15.4424	-99.9614	14.0085		-162.5	0	0			37.5914	26.6248	34.874		-162.5	0	0
	16.1021	-100.819	14.1853		-157.5	0.0002849	0.000493462			35.0483	28.5542	33.6722		-157.5	0	0
	15.7795	-100.217	10.2305		-152.5	0.000997151	0.00172712			35.3037	28.9579	35.0435		-152.5	0	0
	15.7459	-100.389	11.1534		-147.5	0.000854701	0.00148039			36.2279	27.716	33.9356		-147.5	0	0
	16.8445	-100.67	14.2738		-142.5	0.0011396	0.00197385			35.2565	27.7215	35.456		-142.5	0	0
	13.7854	-99.4096	14.3437		-137.5	0.000997151	0.00172712			36.6152	29.2314	36.1935		-137.5	0	0
	16.0639	-98.445	16.8281		-132.5	0.000997151	0.00172712			36.2508	29.4701	34.573		-132.5	0	0
	16.5128	-98.4576	16.198		-127.5	0.000854701	0.00148039			34.8126	29.1887	33.5958		-127.5	0	0
	15.1511	-98.3193	16.747		-122.5	0.0011396	0.00197385			34.6164	27.777	34.8145		-122.5	0	0
	15.9498	-96.9423	15.5939		-117.5	0.000712251	0.00123365			35.0487	26.5856	33.5032		-117.5	0	0
	18.4784	-96.569	17.0476		-112.5	0.0017094	0.00296077			32.333	29.3816	34.591		-112.5	0	0
	17.4267	-95.8236	15.6339		-107.5	0.00213675	0.00370096			30.5407	27.6412	31.8823		-107.5	0	0
	19.2443	-96.4757	18.0963		-102.5	0.00697173	0.00613368			30.9808	28.9217	31.5817		-102.5	0	0
	19.5033	-94.0966	17.0432		-97.5	0.00847904	0.00767675			30.1681	28.623	31.9679		-97.5	0	0
	19.8257	-94.2395	16.0657		-92.5	0.0107351	0.0121542			30.4026	30.3251	33.0314		-92.5	0	0
	20.8908	-92.3688	15.3273		-87.5	0.00952593	0.0150891			31.0356	30.5022	33.1437		-87.5	4.42321e-05	7.66123e-05
	21.9503	-91.386	14.0698		-82.5	0.0101106	0.0089658			31.76	29.9989	33.5432		-82.5	4.42321e-05	7.66123e-05
	22.2843	-89.6923	16.5394		-77.5	0.0201482	0.0176837			32.3983	31.237	36.5823		-77.5	0.000430077	0.00038961
	23.3806	-87.1065	17.1137		-72.5	0.0210345	0.0190659			32.7235	30.8049	37.5754		-72.5	0.00165633	0.00172915
	24.4189	-84.3539	19.0776		-67.5	0.0143791	0.0174274			31.291	30.9745	35.2921		-67.5	0.00169513	0.00161996
	21.3762	-81.9776	16.4561		-62.5	0.0103989	0.0180114			30.2781	28.5235	36.7855		-62.5	0.00320583	0.00284731
	23.1835	-79.4191	14.821		-57.5	0.0109687	0.0189983			29.6383	27.5732	37.9118		-57.5	0.00513437	0.00457026
	22.6147	-77.8385	19.8044		-52.5	0.011396	0.0197385			28.8891	25.9418	39.5289		-52.5	0.00632657	0.00875743
	23.4394	-76.4403	17.9512		-47.5	0.0230054	0.0332364			27.5752	25.6359	38.9388		-47.5	0.00794548	0.00966845
	21.8302	-74.3742	12.5627		-42.5	0.0118588	0.0172308			26.553	23.9334	40.1752		-42.5	0.0100707	0.0105819
	22.6344	-73.9392	12.3532		-37.5	0.0219722	0.0231561			27.2264	20.4473	37.7737		-37.5	0.0110263	0.0121653
	24.2147	-73.0875	11.761		-32.5	0.0323963	0.016802			25.467	19.1899	40.5884		-32.5	0.0139613	0.012881
	24.7019	-70.8505	10.5986		-27.5	0.0349734	0.045309			25.45	17.3065	40.7469		-27.5	0.013512	0.0122879
	24.6175	-71.5356	10.5343		-22.5	0.0371018	0.0431886			25.3461	15.5445	41.9163		-22.5	0.0282411	0.0151794
	24.556	-69.4974	7.36343		-17.5	0.0419663	0.0462738			25.116	11.5622	43.0655		-17.5	0.0470747	0.0328331
	25.3672	-68.2068	7.6315		-12.5	0.0243012	0.0141389			24.6895	10.3761	44.0047		-12.5	0.0545322	0.0423705
	24.3034	-68.0751	9.71622		-7.5	0.0604683	0.0714407			24.0093	8.5875	44.7891		-7.5	0.0759158	0.0497403
	23.5326	-65.9392	6.9687		-2.5	0.0281418	0.0245192			24.8881	6.74239	41.6465		-2.5	0.115745	0.0315088
	23.7846	-66.2703	5.45522		2.5	0.0365088	0.0436897			26.5855	3.25385	41.7803		2.5	0.115175	0.0230773
	23.3217	-65.1477	4.76291		7.5	0.0433153	0.0480682			25.9812	2.03243	41.4989		7.5	0.116677	0.0527854
	22.4837	-63.3351	3.12627		12.5	0.0165298	0.0109884			26.8419	1.1785	43.1079		12.5	0.0764217	0.0246221
	21.2387	-62.5914	0.844405		17.5	0.0448121	0.0200148			27.9791	0.503111	43.8392		17.5	0.0406995	0.042783
	22.666	-60.5543	-0.196419		22.5	0.0620552	0.0459933			28.875	-0.797692	38.4917		22.5	0.031874	0.0208565
	21.0509	-62.3012	-1.39125		27.5	0.0269671	0.00991016			28.1298	-0.574168	41.6111		27.5	0.0421917	0.0146303
	22.9984	-60.4987	-1.11539		32.5	0.0301804	0.0170979			28.0835	-1.80373	39.7914		32.5	0.0266938	0.0136794
	22.9311	-61.9596	1.35713		37.5	0.0301769	0.00764057			28.2655	0.193402	41.491		37.5	0.0209176	0.00900297
	22.8105	-59.8689	0.493169		42.5	0.0213134	0.0157292			28.2566	-1.77125	40.7929		42.5	0.0178739	0.0209461
	22.0973	-60.6422	0.609714		47.5	0.0321354	0.0328399			28.13	-1.32069	41.4603		47.5	0.00975001	0.0103507
	23.901	-60.0071	0.327083		52.5	0.0196016	0.017971			25.9737	-0.328643	44.2566		52.5	0.0125677	0.00925424
	24.1661	-59.1057	0.862562		57.5	0.0209168	0.0228048			25.7621	-1.89775	41.2455		57.5	0.0222469	0.0251994
	25.4989	-60.9109	6.06999		62.5	0.0137927	0.014073			26.2644	-2.13729	43.0501		62.5	0.0167755	0.0189826
	27.7493	-60.8128	5.6539		67.5	0.00775351	0.00800898			26.3648	-3.01869	44.0672		67.5	0.0197106	0.0220383
	27.1866	-59.196	5.47292		72.5	0.0118994	0.0141725			27.0905	0.200557	43.8101		72.5	0.0119914	0.0111062
	30.3044	-59.3773	6.64545		77.5	0.0187485	0.0292059			28.1126	0.430231	44.6328		77.5	0.00238348	0.00243775
	31.1232	-57.3742	5.25705		82.5	0.0206102	0.0342283			26.9066	-1.55894	43.8444		82.5	0.0089322	0.015471
	31.7782	-55.1998	8.76793		87.5	0.0161563	0.0261548			27.9652	-3.96406	43.5988		87.5	0.00933821	0.0161742
	31.7289	-53.0351	8.86074		92.5	0.0111921	0.0175674			30.3483	-4.62846	45.9405		92.5	0.00121803	0.00210968
	35.0762	-49.9065	6.9619		97.5	0.00561676	0.00899848			28.849	-4.55405	43.5208		97.5	0	0
	35.4694	-45.7445	8.0649		102.5	0.00686236	0.0107947			32.2628	-5.00269	43.7271		102.5	0	0
	35.2436	-40.0742	8.26567		107.5	0.00810795	0.012592			32.1776	-5.53945	44.0139		107.5	0	0
	37.3767	-33.9974	13.4432		112.5	0.0041045	0.00603306			36.2005	-6.31361	44.0215		112.5	0	0
	39.3841	-28.7218	11.3068		117.5	0.00571781	0.0084664			36.4131	-4.80619	44.7318		117.5	0	0
	38.6484	-24.8321	14.1692		122.5	0.00702304	0.00936089			33.6302	-4.89127	44.0219		122.5	0	0
	40.7698	-18.3855	14.0148		127.5	0.0115317	0.0135635			34.7388	-4.02952	44.687		127.5	0	0
	7.19047	-12.4424	18.4205		132.5	0.00293182	0.00415944			32.1686	-4.62134	41.2831		132.5	0	0
	7.19008	-10.3036	20.5199		137.5	0.0011396	0.00197385			30.5303	-4.44262	41.4046		137.5	0	0
	5.93577	-3.43285	20.958		142.5	0.00014245	0.000246731			27.7033	-4.55697	39.4412		142.5	0	0
	5.83665	-1.37753	24.301		147.5	0	0			27.6689	-2.38311	34.7657		147.5	0	0
	3.53095	-0.363711	24.6264		152.5	0	0			26.1564	-2.90241	38.3709		152.5	0	0
	3.15178	3.31949	27.3102		157.5	0	0			24.8754	-1.08822	35.2101		157.5	0	0
	3.06856	4.27606	27.0281		162.5	0	0			24.1495	-3.28907	35.1525		162.5	0	0
	2.0816	5.8938	28.4273		167.5	0	0			23.9741	-1.42304	32.3731		167.5	0	0
	1.19202	7.79066	27.7308		172.5	0	0			23.7025	-3.28892	32.2247		172.5	0	0
	0.620175	9.13826	30.4132		177.5	0	0			22.8121	0.27488	32.0042		177.5	0	0
	-0.0598189	8.03645	29.5845							21.3612	-1.30777	29.2792
	-2.13261	10.5612	32.2772							21.333	0.17318	29.3016
	-2.41073	11.2835	30.886							20.7299	-1.37889	27.5165
	-3.99048	8.54107	30.92							14.2008	0.158084	27.9679
	-5.24334	10.8747	32.0357							11.7795	0.824064	26.6724
	-8.23867	11.078	33.3271							11.0536	1.25128	27.5423
	-8.80782	13.5978	32.0485							10.2822	0.388946	27.1813
	-7.40274	15.7209	32.2805							7.56564	1.67731	28.0501
	-8.9331	16.2903	35.9076							7.31097	1.5197	28.0973
	-9.01345	18.8809	34.0391							7.62933	-1.85736	29.0713
	-8.22144	19.225	36.9325							5.50255	1.25138	27.5817
	-9.55436	21.3285	38.7164							7.52576	-1.50649	28.6809
	-8.23176	18.4795	36.1196							4.83327	-1.05625	29.3024
	-6.8734	19.7017	34.278							4.09247	-49.9417	27.4877
	-6.00299	20.7252	34.403							4.70246	-48.5053	29.2254
	-5.21688	21.8073	50.9787							7.76541	-46.6668	28.9451
	-6.46627	22.9438	49.383							8.55996	-46.3313	26.8599
	-4.83912	22.8663	48.6277							8.249	-46.5114	28.2911
	-5.50604	20.8881	46.9661							9.19167	-44.2642	27.0886
	-5.15448	23.8818	44.2844							10.2943	-45.5997	25.9148
	-6.03292	24.0872	44.8577							9.97024	-45.5622	28.7662
	-6.87712	25.404	45.5624							10.0381	-46.1923	26.5395
	-7.35509	24.444	42.356							7.84345	-45.0093	27.8984
	-7.99739	24.4096	44.6746							7.82041	-45.0618	26.2949
	-8.37418	24.4122	43.1862							8.0916	-47.3651	29.0565
	-9.85176	26.0034	45.5124							6.04504	-46.7496	29.9822
	-10.1166	24.8927	45.1733							4.59485	-46.041	27.281
	-9.89853	23.5277	44.0541							5.02913	-44.9354	30.5755
	-9.68858	25.187	44.7287							3.51018	-44.9772	29.9795
	-9.52436	-58.8847	47.5364							4.45352	-40.9317	26.1006
	-9.6941	-59.9564	45.3925							4.59769	-40.2603	25.9132
	-9.56546	-58.9971	44.3109							4.77439	-38.4615	27.2284
	-9.21437	-59.1368	44.5637							5.5399	-33.622	24.0725
	-8.46649	-61.8318	44.9483							6.10953	-33.4382	24.0332
	-9.36527	-58.2352	43.9605							6.93428	-30.3162	27.9485
	-10.2681	-58.4256	45.7912							5.77156	-28.8342	27.3059
	-10.5545	-56.7837	45.1698							7.09121	-25.6661	25.7268
	-10.1593	-56.5215	44.677							5.98741	-24.4628	25.7247
	-9.62509	-55.2779	44.7425							5.68038	-20.6298	25.7617
	-9.86926	-54.4417	46.4506							4.49877	-22.6682	26.699
	-8.67604	-51.0117	48.2693							5.71598	-21.5449	23.5836
	-7.95678	-51.6625	46.4308							5.76236	-21.5941	21.2363
	-7.51696	-51.088	44.3714							7.58976	-21.3054	22.7617
	-6.49926	-53.4565	46.4507							5.95846	-21.2254	23.6903
	-5.16282	-51.8024	46.9556							1.85656	-21.1535	20.1965
	-4.97015	-51.1573	49.2715							2.43254	-19.51	18.261
	-4.79171	-51.0721	45.7824							2.87751	-17.8162	15.2176
	-3.42011	-52.6318	46.9194							2.63891	-17.7115	15.5166
	-2.01524	-53.6461	45.8234							2.26066	-13.4303	12.4239
	-2.27103	-55.1182	44.5875							2.39309	-11.9208	12.9006
	-0.644671	-54.7436	46.4069							2.16318	-9.97798	11.3699
	-1.01315	-57.0279	45.8765							-1.32171	-8.9551	12.5414
	0.83127	-55.7397	45.9997							0.942834	-7.84595	11.5098
	0.0737038	-57.4174	46.902							4.39675	-5.69109	12.1698
	0.537053	-57.4634	46.5138							3.91341	-4.71885	13.8119
	-0.125906	-57.4526	46.1764							3.41491	-5.56909	14.6677
	-0.132963	-58.5957	44.256							7.84863	-4.28192	17.1734
	1.18612	-59.1968	45.4751							8.2277	-5.49923	17.7059
	1.08795	-58.1282	45.1452							8.6146	-5.42245	18.0794
	1.31036	-59.861	42.5687							9.11334	-5.54121	18.2095
	0.255579	-57.9943	42.189							10.799	-6.44138	20.4079
	1.2011	-60.0104	40.7841							10.6243	-6.57806	20.014
	1.40077	-59.7817	40.0965							9.364	-6.48829	19.7322
	1.80323	-62.2036	39.6058							6.29415	-6.52438	21.3895
	3.00371	-60.2614	37.2197							7.26598	-6.13387	21.3128
	2.9759	-62.2225	36.4679							6.26953	-6.0217	21.5568
	2.94784	-64.2374	34.8469							5.38687	-7.09806	21.2482
	4.04925	-64.9079	36.6021							2.53494	-7.55006	22.6961
	5.15957	-67.3404	36.3409							2.96261	-7.16865	23.9701
	6.69863	-67.9875	34.4577							3.66348	-8.84131	25.1519
	8.05255	-68.667	36.9891							5.10843	-6.80207	25.7312
	8.21067	-71.2154	36.5953							5.16357	-7.81878	27.6628
	8.63227	-67.8281	36.5015							5.48746	-7.59064	31.2878
	6.44111	-67.7198	39.326							5.51602	-8.06469	31.5912
	6.30748	-64.8707	39.3467							9.03895	-8.99812	32.05
	6.3886	-62.4435	42.8869							5.4742	-8.43996	34.0692
	7.15387	-61.4105	44.0164							58.9535	-8.53131	37.3323
	6.61699	-60.9708	43.4136							61.8599	-7.99177	37.5082
	7.96977	-59.5789	45.2898							57.7474	-8.27338	41.1612
	7.7542	-60.3227	46.537							59.6344	-6.72346	42.4501
	6.10045	-57.9703	49.1877							58.7927	-5.9703	43.6581
	6.03157	-56.5323	50.367							58.434	-4.64906	40.6996
	5.64117	-56.5071	51.751							58.4882	-2.35262	41.971
	5.61526	-56.2952	50.5548							57.3952	0.616933	41.9674
	5.27666	-54.9788	52.5762							54.7388	2.90077	43.0112
	4.99675	-54.2589	52.6015							57.7626	5.63268	42.9708
	4.53574	-51.812	55.1976							55.0293	6.88038	43.0632
	5.08436	-50.1358	56.5694							55.556	7.68682	43.2247
	5.75702	-48.237	56.9149							54.5302	11.6278	42.6233
	9.41972	-48.3649	59.4468							55.1413	12.8127	44.8475
	9.35117	-46.2353	56.9258							55.7137	10.4778	44.0674
	-13.817	-45.964	58.1691							56.3422	11.8968	42.9164
	-14.4847	-44.7563	59.5803							56.1028	11.9731	42.9372
	-15.7456	-43.2087	58.3692							57.6597	12.3775	42.127
	-15.7864	-45.3367	58.6869							60.1628	11.8401	42.4479
	-16.6194	-43.8985	58.5922							59.3569	13.0041	42.0775
	-15.74	-46.4029	58.7524							58.9125	11.1473	42.5875
	-14.0525	-45.3161	58.749							58.5176	12.0018	41.4987
	-16.2271	-44.6268	59.1682							59.2129	10.9	43.7941
	-14.0693	-46.3703	63.5219							57.826	10.7242	44.0553
	-13.5528	-45.427	63.1824							60.565	9.7928	45.0763
	-16.7908	-45.8167	62.4322							59.2517	9.71714	45.3647
	-16.1874	-45.386	60.8329							58.8948	10.0215	47.2692
	-16.7499	-46.0856	61.0623							56.9447	8.92191	48.6677
	-17.1661	-44.188	58.403							55.4473	10.2261	48.6576
	-17.6895	-43.4734	59.5397							55.0109	9.81273	46.7753
	-18.3592	-41.8567	59.2645							52.2386	10.1286	47.9326
	-16.9787	-39.8785	57.8841							52.8807	8.85497	49.9284
	-19.9907	-39.2458	57.3029							51.2594	9.89583	47.3239
	-17.5326	-38.9808	54.8528							50.7096	11.2149	48.018
	-16.7586	-38.2244	52.733							50.3702	9.48286	48.345
	-17.3493	-39.914	51.8733							51.6882	9.57051	45.8623
	-18.2025	-42.508	49.4569							50.5632	8.28747	47.8534
	-20.0719	-40.2119	47.5521							51.6837	8.48353	46.3796
	-18.5546	-44.742	46.4246							54.2719	6.6126	45.9219
	-19.9228	-48.5414	42.2598							54.7364	7.02628	45.973
	-22.1796	-51.4757	-22.0341							56.2314	4.39178	44.5066
	-23.3769	-55.1546	-21.3586							58.1587	4.51942	46.2074
	-20.184	-58.1787	-26.1851							58.8819	2.66752	44.1947
	-22.2246	-59.4012	-23.4741							58.7319	1.40314	43.5457
	-21.6632	-60.0301	-28.8669							61.2965	1.56092	45.108
	-21.5695	-61.1721	-27.8817							63.5977	2.0467	42.0746
	-24.4458	-60.8833	-21.2283							62.2023	3.03945	42.8999
	-24.1537	-59.6978	-23.0336							62.2145	2.41591	42.6022
	-25.4778	-60.3228	-23.8809							64.618	3.01802	42.9358
	-22.4486	-59.6594	-24.2476							63.5661	2.24907	42.6561
	-25.1763	-58.8573	-21.4695							62.293	2.09588	42.8817
	-26.5076	-56.0179	-23.5513							64.2926	1.0412	42.6808
	-24.4683	-53.9493	-21.7898							62.3019	-0.195289	45.0013
	-23.9304	-52.5639	-24.0352							61.5177	-2.21182	44.7392
	-22.8969	-114.62	-20.8077							61.2736	-2.55037	43.819
	-24.6356	-115.387	-18.9614							61.9369	-4.72741	44.3905
	-26.5952	-111.772	-21.164							61.6425	-3.82905	43.6437
	-27.007	-112.641	-19.577							62.9098	-3.90383	44.732
	-27.2179	-107.562	-19.519							63.8117	-5.64946	42.4723
	-26.6889	-106.935	-17.4437							63.2265	-5.59462	39.3049
	-17.2149	-107.065	-14.0508							66.2291	-4.42452	41.6286
	-15.1126	-106.451	-16.1173							65.3142	-3.58539	41.4513
	-15.5554	-106.523	-14.6094							64.5221	-3.37384	41.2678
	-15.7208	-108.838	-14.5658							64.6941	-4.29785	40.1456
	-15.148	-109.729	-16.2427							62.6557	-4.11369	39.8235
	-13.1584	-109.386	-15.0818							62.4132	-2.20571	39.126
	-31.1975	-103.356	-14.021							59.8714	-2.18881	38.4611
	-24.5116	-103.825	-15.8443							58.316	0.355046	40.8148
	-24.6655	-102.325	-15.5195							57.6519	-1.37754	37.1706
	-25.5402	-100.808	-12.7586							57.1926	-0.25841	35.8332
	-26.6168	-101.323	-19.1826							56.4273	2.54953	34.5491
	-27.4312	-100.48	-18.8027							56.6914	2.07527	33.4027
	-25.4508	-100.874	-15.9582							58.1686	1.54594	33.729
	-24.8524	-100.817	-16.8952							58.6434	3.76193	31.7757
	-25.0536	-96.6183	-19.0904							59.1432	6.57248	30.7019
	-27.174	-97.3111	-18.8999							61.1758	4.86217	28.8308
	-24.8255	-89.1743	-17.9665							61.268	2.93634	26.7466
	-25.0678	-91.2513	-18.0465							63.8515	1.41078	24.171
	-23.8368	-88.5227	-18.9675							65.6042	0.566585	23.1152
	-23.2944	-89.7989	-18.8071							65.9972	-2.61745	21.8123
	-26.5205	-89.2993	-17.78							67.1075	-3.47714	20.186
	-24.0824	-93.3784	-15.6383							69.9477	-3.39186	17.948
	-25.2958	-88.744	-17.9395							69.4155	-4.41819	18.2343
	-25.1402	-85.8865	-18.7827							70.1887	-6.86628	17.3
	-24.3982	-86.8749	-18.7293							68.6404	-6.37784	19.5482
	-25.9353	-92.8674	-18.6376							69.0584	-8.74326	20.4592
	-26.8028	-91.5078	-16.8244							66.8959	-8.11615	21.479
	-27.6066	-91.9699	-18.6143							68.2586	-10.9299	17.4654
	-27.1346	-88.7894	-19.1572							68.9547	-8.31011	17.4733
	-27.8246	-91.9771	-19.1134							68.1494	-2.39943	18.8551
	-31.2198	-91.0878	-21.0352							66.6867	-3.72025	21.049
	-30.412	-89.8768	-23.2616							66.8203	-2.04102	20.7323
	-32.0114	-88.1056	-23.0409							69.4139	1.50812	18.9745
	-31.8456	-89.1062	-20.3839							67.4521	0.867585	20.4992
	-33.2813	-89.1484	-20.4788							67.8708	3.33796	18.9782
	-33.4486	-86.2984	-20.4492							71.6142	4.01738	14.8751
	-45.994	-88.1833	-20.3604							70.0974	2.85372	13.7013
	-46.8439	-85.6145	-18.6933							72.3584	5.1086	15.7272
	-43.2368	-84.541	-18.6717							72.7352	7.68454	13.8222
	-39.3188	-84.605	-18.7531							72.3796	9.01262	9.08283
	-39.779	-84.8642	-18.7733							72.2244	10.9601	9.67977
	-36.2318	-81.042	-18.1973							72.5969	12.6979	9.39388
	-36.5511	-79.5488	-14.8204							72.5406	13.2966	6.07371
	-34.797	-78.9979	-16.1907							71.2805	16.0201	7.50626
	-35.069	-77.1937	-15.9785							71.0722	18.447	5.74344
		-76.9852	-13.5482							70.5573	19.6799	5.02906
		-75.3717	-11.8215							72.5668	22.6103	3.69813
		-75.2609	-11.3471							72.9226	22.7062	0.276976
		-75.0973	-11.5254							72.6713	23.6428	1.36128
		-74.2818	-11.0685							74.172	25.6523	1.30211
		-74.3021	-10.4502							74.9967	26.2607	-1.48313
		-75.6573	-10.671							77.6373	29.297	-2.78724
		-25.6344	-10.6529							78.2698	30.448	-0.332361
		-23.4787	-10.5966							80.8831	30.6705	-3.85263
		-21.0105	-10.6214							81.1763	33.2569	-3.36053
		-16.5221	-11.6736							84.2472	35.1143	-3.14093
		-14.6	-11.2505							84.1598	37.6585	-5.21835
		-12.7416	-11.1499							84.4088	37.8299	-0.71593
		22.6882	-8.38126							86.2027	38.7472	-4.74937
		22.6286	-8.04817							86.4319	39.8834	-4.10097
		21.164	-4.91843							87.5271	40.3394	-5.49115
		23.6418	-7.66627							88.078	40.0822	-4.05519
		22.5596	-7.89488							88.7415	38.8592	-5.97508
		21.826	-8.09067							89.9859	38.2901	-6.57114
		21.427	-6.15654							89.8768	35.9021	-7.59645
		22.216	-8.60729							90.9124	35.6741	-6.78236
		22.3138	-8.51548							90.2313	34.7475	-8.1745
		23.1089	-8.37906							89.7954	34.2512	-3.39797
		21.8642	-4.91154							88.0535	34.9738	-5.48215
		22.3256	-4.67226							86.5022	35.7973	-3.14828
		21.8027	-4.9867							84.5633	37.1626	-3.93782
		20.9749	-4.58963							83.5163	39.3928	-7.19599
		21.1535	-1.7221							80.7252	40.0747	-5.52904
		23.7056	-1.48712							80.4279	42.0087	-4.84953
		22.0393	2.59933							80.9336	44.7706	-6.27507
		23.9025	2.79245							80.6201	44.751	-6.33408
		25.9549	5.02856							80.1678	46.4937	-5.65499
		29.0649	6.76196							81.263	45.8181	-6.68992
		30.661	8.95516							82.4463	45.647	-6.23988
		32.9587	8.41149							81.6636	44.9897	-5.11379
		33.4273	9.1965							82.2844	45.0136	-2.27857
		34.522	88.5694							84.7812	45.6369	-0.869741
		34.3528	89.8411							85.3287	45.5101	2.22047
		34.2784	89.6795							84.3966	43.4755	1.66322
		36.2329	89.7547							86.7225	43.129	0.243334
		34.597	88.6915							84.3347	41.9991	0.311567
		33.7145	90.2956							87.3398	39.6854	1.58718
		34.8178	90.4033							85.0712	38.836	-1.38638
		35.9299	89.8054							85.9512	39.3	-1.67877
		35.027	90.3275							85.6536	35.4629	-3.17148
		36.8619	90.5224							85.4393	32.2229	-3.83601
		36.6538	91.7824							86.184	29.191	-3.97646
		38.7207	89.268							85.4449	27.9295	-2.94008
		39.6101	89.8683							87.3839	21.9164	-3.04918
		39.6537	89.9526							87.8736	18.9852	-2.0101
		40.7305	89.7126							90.0715	18.4166	-2.09148
		41.1907	91.1693							87.4567	15.01	-2.04486
		40.149	87.2966							87.6422	11.4928	-2.71391
		2.61416	90.058							84.7885	5.34313	-1.19494
		-0.519269	89.5216							84.0071	1.98092	-5.12104
		-0.409892	91.604							80.6579	-1.0804	-5.63846
		-0.0128033	90.0414							77.3376	-3.94633	-1.89409
		1.05871	90.7274							75.3372	-5.65287	-3.71864
		1.88469	95.5							73.4601	-9.60455	-5.65
		1.82391	93.7662							69.7987	-8.05391	-5.47852
		1.40238	95.6407							68.9617	-11.0801	-0.915076
		3.65114	95.0232							66.2705	-11.0288	-2.2734
		3.09687	93.8061							65.4422	-11.6353	-1.62808
		4.24652	94.521							65.9347	-10.7208	2.31338
		4.24137	95.5296							64.2946	-11.4	-0.393143
		7.2478	95.8261							67.8549	-10.4487	5.49387
		6.46675	94.2684							68.4718	-12.0477	1.53296
		6.14955	92.6267							66.1773	-10.7195	0.205277
		7.25414	92.7309							67.7416	-12.7299	1.11927
		7.60762	94.1021							68.8459	-11.5097	1.93202
		8.6631	91.2726							68.2769	-14.1829	2.72628
		8.77785	89.8612							66.671	-14.1891	-0.339681
		9.57427	90.2308							65.9894	-14.9304	4.61839
		10.4882	88.0898							67.6994	-16.8938	4.04271
		10.5447	87.2816							68.2826	-21.2558	42.3667
		11.7848	87.7235							66.2957	-25.8545	39.9504
		13.5923	85.8092							65.5193	-34.0502	38.3375
		12.991	85.8801							66.6785	-40.1894	34.2868
		14.0109	85.4736							64.475	-44.8648	32.612
		15.6192	86.3161							62.7238	-55.6585	28.5815
		14.9561	84.8548							60.7704	-64.8122	25.8482
		16.3802	83.9435							60.624	-70.2711	23.2451
		17.5623	80.4125							59.4355	-77.6113	19.4666
		18.4514	82.3169							57.4658	-84.553	17.1304
		18.825	80.0113							55.2989	-87.5664	10.6143
		19.3732	80.2126							52.3323	40.1132	12.3539
		18.6642	79.0007							48.3853	41.8347	7.76331
		17.9326	80.837							43.7945	42.9527	7.4114
		19.0413	79.5883							39.6864	42.5163	7.11696
		20.7542	79.7532							35.3588	39.973	6.41152
		21.4934	81.0224							29.1477	39.5305	8.06438
		21.7795	80.3787							25.9172	37.6085	5.34095
		22.0665	78.0216							18.9486	37.7534	5.71449
		25.0438	75.8112							14.616	40.0369	9.75211
		27.4785	76.9439							11.2697	37.4876	9.91531
		28.0369	76.6806							7.28503	38.897	10.6536
		30.9191	77.1643							3.7319	39.9593	13.7547
		31.843	78.1087							1.69659	41.9212	13.5169
		34.3783	78.1829							-0.00299213	44.1582	18.2965
		35.8867	78.4295							-2.95963	41.8145	18.7773
		38.1649	79.6723							-2.55404	42.5283	20.9021
		39.6843	78.4208							-0.262109	40.7766	20.8429
		41.3912	78.307							-0.392214	41.8171	23.1916
		43.4891	79.5962							0.184841	40.6021	21.4947
		44.6649	79.7077							0.098826	43.1479	20.5072
		45.7046	81.8628							0.708058	41.1233	19.651
		43.9498	81.1562							2.16987	40.8596	15.5778
		44.6169	81.7504							2.5742	38.5732	14.6009
		43.0709	82.6225							7.69958	39.5978	11.5492
		41.1758	81.9743							8.7272	40.6455	12.6036
		39.0199	81.4658							10.1543	41.137	8.96755
		39.0325	84.28							11.478	41.1161	6.86804
		37.0052	82.8776							12.2239	40.7283	4.96239
		37.1458	82.1526							13.3494	39.1945	6.46235
		36.9921	82.2804							14.2861	40.7082	5.53696
		37.3085	81.3217							12.6749	40.8116	5.56064
		38.7383	82.0136							14.6175	36.7328	4.8186
		41.3823	82.0884							14.547	37.5806	4.20418
		43.8989	79.4765							15.572	36.7613	5.70378
		46.6716	76.7947							13.0791	31.1777	7.17351
		48.6927	79.6777							13.541	33.0989	5.04301
		51.5202	78.7912							13.0052	30.4455	4.68256
		54.8442	77.9165							9.47407	33.5232	5.18184
		57.1809	75.5321							9.49564	30.7978	2.93889
		60.2698	76.1684							11.4636	34.2376	3.6694
		60.7229	75.1958							11.6557	30.5102	5.07805
		62.6154	74.6236							12.0764	29.9486	10.0281
		63.4666	78.3043							13.5774	28.9279	6.74132
		64.0133	76.3274							13.3791	26.8175	8.99698
		62.9801	77.4016							13.1266	21.8909	9.19195
		62.7574	78.0099							12.7412	21.1354	9.3077
		60.6663	76.7474							13.2514	17.9283	10.4604
		58.5664	77.4222							11.3561	12.5864	11.7135
		58.0166	76.8845							11.2543	10.9315	13.9819
		58.0176	76.0306							10.9678	5.4345	13.2048
		57.1321	74.7416							10.0742	2.59804	11.8931
		54.8772	75.0947							9.6042	0.47071	14.4827
		57.3332	79.2607							8.73915	-0.0631874	14.5792
		57.6672	79.1293							8.29612	-2.26554	14.7345
		59.35	78.5575							7.1059	-2.45439	13.3105
		59.8474	78.1939							8.14215	-0.624778	13.2385
		61.4802	75.7632							6.92756	-1.18695	11.5191
		64.31	74.5684							5.75128	-3.39585	8.318
		65.8598	74.4174							6.81693	-4.51005	9.61487
		65.8296	74.0167							6.19875	-4.42317	6.70605
		64.9461	74.6941							3.92427	-3.43214	2.4777
		63.3755	73.5173							2.62913	-4.8638	0.933724
		62.9718	74.488							2.88675	-4.26243	2.24513
		57.4183	75.8191							4.36058	-4.80925	-0.997467
		56.351	75.92							4.36153	-4.73664	-0.515479
		54.0955	77.4815							4.73856	-3.76451	5.09231
		50.8501	78.3501							2.3648	-5.76124	1.08268
		47.3462	79.1042							5.28009	-7.86493	2.7119
		45.9347	78.1649							4.86004	-6.1353	3.54944
		-34.0041	79.9501							3.18129	-5.50007	4.88767
		-36.3623	79.971							4.08788	-5.03194	6.98605
		-37.3781	80.684							4.54919	-4.88605	8.83752
		-37.3764	79.8453							5.00256	-4.34182	8.82351
		-40.5978	80.4835							6.5931	-3.37932	5.96907
		-40.1478	81.9909							6.92801	-2.77099	7.29453
		-40.1309	79.7557							9.87694	-0.976578	8.22735
		-39.795	80.1773							8.02006	-2.52815	8.7896
		-40.0905	80.4579							8.3013	-1.69423	6.19756
		-40.5855	82.8048							9.9702	-2.69628	7.26929
		-42.8493	80.9645							11.9667	-4.37328	6.40275
		-42.7415	79.9588							10.9276	-3.57505	4.90389
		-42.6974	81.5637							11.2461	-4.17371	6.36645
		-41.9688	80.3208							13.1745	-5.77476	9.36614
		-41.4953	79.2954							13.5219	-4.85555	4.94738
		-42.2001	77.8668							11.6099	-5.86018	4.26928
		-43.581	76.5717							11.1097	-5.80412	5.18813
		-43.0445	77.6971							11.4515	-4.73939	6.54446
		-43.3727	74.0342							10.6286	-6.55955	6.63652
		-43.9312	74.9446							12.7464	-4.62116	7.51868
		-43.9455	72.0373							11.501	-5.1272	4.3712
		-46.2693	71.3787							10.6822	-7.04403	5.8279
		-45.6267	71.5565							11.7038	-6.04243	3.2806
		-47.5207	72.7935							8.02011	-4.29985	0.402854
		-44.2395	74.7811							9.99661	-7.18841	3.54487
		-45.4831	73.5227							8.08313	-5.99558	-0.553769
		-42.8496	72.5978							8.76109	-7.04605	-0.402318
		-42.718	72.1662							6.33366	-5.60923	-0.780728
		-42.3557	74.6226							6.91934	-4.57938	-1.21687
		-38.427	74.3073							5.89416	-5.19383	-1.86096
		-39.2271	74.1271							6.77433	-6.38082	-1.52683
		-35.7895	75.0676							5.98636	-7.6606	-0.473914
		-33.0394	76.8594							4.61878	-5.78877	-0.778387
		-30.3051	78.5698							4.43091	-5.80392	1.86246
		-27.8601	78.7933							2.94755	-7.21897	-1.3675
		-24.7913	80.9366							1.6023	-6.13448	1.75106
		-21.3087	82.1821							2.77084	-5.69705	3.84846
		-20.0874	82.4683							-0.246318	-5.04108	5.61329
		-15.6583	83.3225							1.65082	-4.36846	2.36404
		-12.9559	83.491							-0.822682	-4.69225	3.44221
		-8.90673	84.0926							-0.601451	-5.22281	4.40551
		-3.71026	83.8696							-1.61902	-3.29946	11.2861
		0.253744	84.0281							-0.978987	-4.76434	8.36632
		5.85142	83.072							-0.428997	-3.07607	12.4789
		9.42158	85.1855							-1.25156	-3.79488	11.1478
		14.5362	83.4421							3.40136	-5.10554	9.25482
		18.8714	84.1533							4.06838	-3.87965	10.4055
		24.2466	82.0387							4.0398	-6.32504	11.0479
		28.8492	83.4043							5.18582	-6.37929	9.664
		34.1448	84.5279							4.40495	-8.72587	10.5785
		38.7952	84.0404							3.81655	-7.37736	10.7779
		43.0248	83.732							4.27311	-9.41325	9.61539
		46.6531	84.8755							4.39321	-9.07481	9.71647
		50.3638	83.7434							2.92858	-8.45267	8.25449
		53.7493	87.1982							2.67451	-8.06326	6.48638
		55.5495	85.6875							2.30456	-8.30256	4.80102
		60.8533	85.2574							1.54094	-7.91637	5.25601
		59.66	86.7982							1.72367	-7.3241	2.70599
		60.802	85.4574							1.95249	-6.11203	1.9012
		60.9564	85.099							1.93338	-6.05391	2.39365
		61.3007	85.1579							-1.37058	-6.59486	1.86619
		60.3428	84.7913							-1.38237	-8.75665	1.39584
		61.1749	84.3442							-2.38032	-6.3826	-0.947681
		60.0261	81.291							-3.40454	-6.07562	-2.4237
		59.064	82.8465							0.550004	-5.29753	-2.26359
		58.2634	80.4529							-1.53234	-5.62621	-0.175203
		58.6131	81.1302							0.162038	-6.80079	-2.21106
		58.3826	79.9586							1.13333	-6.10676	-1.16184
		58.3432	80.416							-2.36653	-6.13837	-1.69642
		56.4527	79.4549							-1.88992	-4.78216	-1.53773
		58.6438	80.2733							-2.36321	-4.32556	-1.93863
		60.0517	79.4126							-1.85528	-6.5945	-2.17345
		62.0015	78.6317							-0.189681	-6.15705	-3.21369
		63.6983	81.8804							2.0092	-2.90631	-3.08543
		65.2468	81.0963							3.11596	-4.63802	-4.48824
		66.4343	81.0376							5.37674	-4.65818	-4.58433
		68.5339	84.3752							5.4303	-3.22287	-2.9614
		69.166	80.5741							4.59748	-5.08215	-2.36379
		69.9382	82.3662							5.49397	-5.44714	-3.13213
		70.6615	80.6183							7.22636	-5.08221	-1.89022
		73.8592	78.3423							4.75619	-5.12127	0.486233
		72.039	78.0699							2.61009	-5.21645	-0.337684
		73.506	77.3872							3.1377	-4.92592	-1.47732
		74.6656	76.6856							4.32351	-7.81802	-0.195158
		76.7261	1.49361							2.89593	-8.16491	-0.465142
		74.8927	1.28906							2.4312	-7.84074	0.427745
		76.1249	2.51728							2.11832	-4.73386	1.6745
		77.0744	2.83261							0.189525	-6.2974	5.05986
		76.9245	0.725811							-1.82116	-5.09165	1.96271
		77.4298	-0.0313101							-4.78061	-6.45002	3.47499
		74.2236	3.44312							-4.51918	-7.59842	3.50932
		73.4526	2.06824							-5.15968	-9.10465	1.36815
		73.4715	3.44868							-4.68019	-7.70036	3.31233
		73.7333	5.58035							-6.11003	-8.42029	-0.479854
		72.4711	6.97442							-6.29809	-9.79394	-1.29661
		71.9234	6.61181							-6.0265	-9.29955	-5.23033
		72.3411	9.86453							-4.85115	-8.11049	-5.41573
		69.9159	13.0453							-4.87511	-8.44332	-7.2216
		72.0612	10.9859							-12.1539	-8.59402	-4.07076
		69.6478	16.4518							-12.3457	-10.1466	-6.8008
		71.2575	16.3147							-13.2285	-8.93371	-7.97251
		-1.76175	15.7259							-10.6027	-10.2895	-10.4859
		-0.864843	15.4717							-12.0693	-6.44386	-8.46414
		-0.644806	17.5102							-15.3592	-8.61062	-9.86688
		-3.12808	15.6541							-14.7024	-8.57903	-7.83362
		-2.4926	18.1786							-13.8189	-8.78389	-7.82315
		-2.82043	18.2723							-14.4281	-7.02163	-8.84321
		-2.22391	16.8051							-14.382	-8.48058	-8.07734
		-3.88426	17.0621							-12.3005	-8.31307	-6.18786
		-4.39558	17.527							-9.30522	-7.86101	-4.38981
		-5.57978	18.8218							-8.31821	-7.44817	-3.08287
		-4.59159	20.8588							-9.30492	-7.82328	-3.17148
		-5.68613	19.4928							-9.68672	-7.23561	-3.3369
		-6.89294	21.9403							-8.0207	-7.77506	-0.135496
		-7.1427	22.6226							-8.78465	-8.01121	1.39991
		-6.53501	25.9049							-5.75717	-8.54738	3.005
		-6.49095	23.1675							-8.3054	-9.6467	4.30256
		-6.87483	27.5104							-3.49676	-9.3578	3.81664
		-7.74633	28.5518							-4.6208	-12.0734	4.69702
		-8.89148	27.8091							-1.90184	-11.1061	4.43156
		-8.90769	29.1435							-1.03022	-11.6002	6.9313
		-9.08665	29.1138							-1.16746	-12.7348	8.61421
		-9.62961	30.6564							-2.2065	-12.0205	9.81006
		91.0831	33.6981							-2.07345	-12.0193	8.1259
		88.1152	31.4886							-2.4315	-14.6472	5.98896
		87.5731	34.6485							-2.64583	-12.6073	5.33821
		85.0273	31.7021							-3.82717	-14.1291	3.44
		82.5979	35.1859							-1.69232	-14.2224	3.94199
		80.7145	35.3074							-1.64219	-14.3739	2.77248
		78.1046	36.6524							-3.71977	-11.9369	3.5889
		74.9731	39.3607							-1.86375	-12.8427	2.96143
		70.1121	37.558							-0.966556	-13.6779	3.91734
		67.4737	42.5563							-1.89366	-14.1442	3.53421
		64.4999	43.862							-1.00555	-13.344	4.19624
		63.7159	45.6513							-1.22432	-14.4509	4.8031
		61.8985	46.4211							-0.577622	-9.59939	6.04637
		56.759	48.7145							0.42541	-12.1118	6.26722
		56.0172	47.8082							-1.80724	-10.1332	5.33545
		53.7383	48.5445							-0.935175	-9.62163	6.59224
		52.1123	48.9215							-2.75822	-8.65357	7.48957
		53.5571	49.3221							-4.07995	-11.5838	6.81708
		54.2259	51.6667							-5.55464	-8.82866	7.06428
		51.4295	50.3141							-4.48177	-8.07849	6.8548
		55.9777	51.4184							-5.18214	-8.92548	5.0219
		54.8544	52.6102							-4.12227	-7.48065	4.63941
		54.6223	53.6857							-3.93161	-10.3519	4.21689
		54.6038	53.5857							-4.14618	-9.43227	5.75322
		53.9341	52.0408							-3.09507	-10.2733	2.79039
		55.0192	55.0251							-2.3953	-11.4327	0.0769788
		52.544	54.335							-0.847131	-11.8632	2.93804
		52.097	54.1317							1.10362	-13.5104	2.52992
		50.1419	51.2134							1.0899	-14.6838	3.94972
		49.2471	49.6063							3.03493	-18.1289	3.47764
		48.33	49.2402							7.07803	-16.4725	5.89565
		45.4129	47.9282							3.92177	-14.9294	4.37589
		46.1615	49.3528							7.51513	-17.5389	4.80256
		43.6495	48.4914							7.45359	-18.132	4.62384
		43.5462	53.24							4.66701	-21.5293	6.6663
		40.093	57.139							6.76123	-21.4549	9.18249
		42.5312	56.6581							7.85658	-22.6239	10.7775
		41.4062	58.8083							5.25115	-25.6613	10.0523
		44.3543	61.635							7.64458	-26.0567	10.5907
		46.2255	63.4991							6.15807	-23.3683	9.94523
		46.025	64.7206							4.53837	-25.317	11.5136
		47.8967	67.4158							6.43018	-23.9707	12.9349
		48.1764	69.0442							8.03684	-25.4902	12.1881
		47.6432	70.2743							9.85347	-25.7151	13.9982
		47.0252	68.7734							10.9771	-23.0642	12.0291
		46.1798	71.6897							13.9872	-25.4502	11.115
		44.7869	69.8579							13.5743	-25.4405	12.5299
		42.8929	69.8499							12.5439	-25.7746	11.4006
		47.8033	69.5283							13.6618	-25.8248	13.2056
		45.0635	69.29							10.5302	-24.8387	14.1573
		44.6731	69.6224							9.27717	-23.4589	12.6807
		47.2189	66.2624							12.9835	-26.9208	12.658
		45.4583	68.7417							11.8981	-28.1998	11.9807
		44.2665	66.915							9.1098	-28.6861	11.7667
		44.7601	66.9852							11.2905	-27.9499	13.6523
		45.5955	63.9283							10.5801	-31.0924	12.1345
		45.8052	65.5914							9.79477	-31.4756	13.8025
		45.5247	62.6613							10.5057	-27.0035	14.4075
		46.0461	64.6355							6.22754	-26.8389	16.1252
		46.3465	64.6137							8.40225	-28.7316	12.6451
		47.9771	64.6237							3.56473	-33.6133	14.2943
		46.028	64.907							3.72271	-34.7619	14.2103
		42.9948	62.406							3.47604	-34.4198	16.2903
		45.9446	61.7779							3.14983	-31.7621	11.6038
		41.361	60.3312							0.101319	-32.3213	15.905
		43.8984	59.5217							-0.51295	-34.9424	13.087
		43.2987	59.1851							-1.51719	-33.7044	11.5226
		41.1975	59.3641							-0.273541	-33.7276	9.67232
		43.2515	59.5609							3.02283	-36.815	13.2505
		42.0907	57.9179							0.685489	-35.0478	9.12467
		42.5261	58.6991							6.85725	-35.2095	7.57508
		43.1443	59.4999							5.29915	-32.0082	6.45538
		42.9137	57.8925							9.34403	-38.339	5.20481
		43.0741	57.4102							9.3176	-38.7552	5.93509
		39.4788	55.2752							6.50423	-38.891	6.00874
		37.6256	55.2455							5.11777	-34.8558	4.82812
		35.3405	53.1594							8.24457	-42.8824	6.2079
		33.086	50.9957							8.27205	-39.815	5.93136
		32.2882	45.5856							3.85635	-35.1495	75.0157
		28.5899	44.6537							5.85863	-38.9026	74.5966
		26.0731	41.6036							5.33293	-32.1837	73.2914
		24.2967	42.6939							4.81814	-36.6727	72.8855
		21.0693	39.1376							5.17607	-41.9865	73.4076
		19.0089	36.3359							6.37862	-41.5221	72.639
		18.8248	35.2424							5.8462	-41.7875	71.7337
		16.788	29.8665							5.45731	-42.5175	71.473
		14.5047	26.1284							9.43773	-40.9436	72.3627
		14.3493	22.1614							8.28526	-40.6091	73.062
		16.9735	21.385							6.63687	-39.4126	72.7917
		16.7171	22.1992							10.8935	-40.0506	70.2157
		15.0323	18.5536							9.1869	-37.8594	69.9034
		14.7373	19.1238							15.4351	-35.7849	69.1207
		16.3266	19.2194							14.7272	-32.55	65.8364
		16.0996	22.1968							14.0228	-29.5519	62.1628
		16.2273	18.929							11.337	-27.9471	60.8193
		15.3931	22.5738							13.2222	-28.8217	60.5599
		15.6737	24.5615							9.27259	-28.2732	59.6216
		14.7572	23.7823							11.0606	-25.1611	56.3357
		14.5986	26.3954							11.8997	-25.3778	56.1503
		13.7771	29.1198							7.89139	-23.9065	51.1961
		12.1592	27.841							9.48693	-12.3912	54.8803
		23.5056	27.5513							6.17954	-13.3345	53.3947
		22.5073	26.4585							7.28408	-10.1305	51.6741
		26.8092	25.8389							7.49562	-9.83546	48.598
		27.7774	29.756							5.03569	-7.65009	49.0531
		29.3628	23.2682							7.08885	-9.15826	50.7678
		30.5728	22.5468							8.53822	-8.80544	48.4157
		32.4261	23.0567							9.1591	-5.03275	48.2894
		34.5197	23.0557							9.4688	-3.63939	48.3721
		35.2875	24.1236							5.39376	-7.49909	48.1216
		35.93	24.9746							6.64202	-8.14797	47.5772
		38.1347	22.8776							4.3735	-6.9516	49.7983
		40.2955	24.6057							7.37813	-7.38142	50.7997
		40.1088	24.6864							2.628	-6.9141	47.8669
		39.7841	25.1416							0.720213	-6.51306	48.7949
		40.9469	23.7507							2.51544	41.9216	46.9532
		42.6492	24.3278							5.35597	38.7894	48.1708
		41.5304	25.3408							2.91904	37.8072	46.3548
		41.4742	28.6502							0.301101	33.9132	45.7534
		39.5737	30.4525							2.90645	31.3732	43.6976
		40.0953	30.5592							-0.393917	29.3842	45.5981
		39.9131	35.294							-4.04616	26.5389	40.2143
		37.4855	34.1283							-1.46584	23.6392	38.5915
		36.4343	34.4633							2.44445	23.2046	36.2112
		35.7462	33.1087							2.03502	21.1717	34.377
		34.2278	33.6175							6.29491	20.8864	32.013
		35.4907	34.3624							6.04992	17.522	31.2205
		33.8427	35.026							6.14365	16.9799	29.0965
		33.6438	31.389							3.53692	15.9179	26.9317
		32.3316	32.7061							-0.363799	15.8008	26.7983
		31.2156	32.5484							0.364769	14.8472	25.1094
		31.7721	31.383							1.05723	14.3214	23.4078
		34.0439	34.254							2.75054	12.6811	26.1639
		34.233	33.1739							-2.24238	11.5897	22.4669
		35.0383	34.4373							-2.55195	10.7704	25.1464
		36.4344	34.2192							-0.404609	9.6762	23.8139
		36.5179	35.5477							-2.25297	9.63131	20.9261
		34.7356	36.0921							-0.509888	9.29333	21.7039
		35.3655	37.8898							-3.05152	8.86443	21.0595
		35.4643	38.5517							-1.95793	7.03635	20.5802
		32.5099	40.5969							-4.81118	7.69324	21.3635
		32.0664	40.9827							-34.1866	6.92293	19.7812
		30.2059	43.9639							-32.8867	7.9515	20.0797
		28.0546	46.647							-36.7509	8.53469	21.3855
		27.1611	49.6609							-35.3134	8.03943	19.7008
		26.3631	49.3973							-21.099	7.80072	23.1656
		24.0425	49.8396							-19.8874	8.76244	20.2248
		24.8572	52.9412							-19.1539	8.49565	21.7513
		23.1424	55.2167							-16.6829	9.75356	20.9639
		24.8268	57.9723							-15.8922	10.2645	21.825
		23.7399	58.9496							-15.2166	11.8157	21.1584
		23.6757	60.0579							-14.2161	12.1103	23.1354
		24.9825	59.9158							-12.5241	12.688	22.3884
		24.2662	58.6705							-12.3932	13.0458	26.6341
		23.2078	59.1644							-9.43148	14.0488	24.4847
		24.1659	59.5469							-12.0359	15.125	25.1007
		24.5983	59.5467							-9.26964	15.9614	26.8302
		25.1193	58.0636							-11.375	18.1117	27.1581
		25.1256	59.0928							-9.30488	16.2693	28.271
		25.6428	59.6881							-9.88209	18.4389	27.201
		24.5761	57.6968							-9.65109	17.1269	28.2094
		25.9806	55.8341							-9.83563	16.4015	30.6423
		29.4174	55.6767							-12.4525	16.6579	26.9828
		28.8542	-33.521							-11.3723	14.953	30.082
		30.8533	-33.9807							-13.7155	17.9357	31.7674
		33.6039	-34.1854							-14.8369	16.8505	30.2354
		34.0191	-32.6362							-17.7828	16.1789	32.4476
		37.3768	-34.6196							-17.6712	17.8884	29.5134
		37.4956	-34.5263							-17.9231	19.0881	30.874
		41.0599	-34.6503							-4.41405	19.0172	31.9141
		45.4028	-34.4192							-3.13938	19.595	30.3116
		49.1423	-33.8625							-3.96819	22.4026	29.3858
		49.561	-33.6611							-4.18397	21.1881	30.8763
		49.8072	-32.1281							-2.56482	22.9449	31.0689
		50.5896	-32.3291							-4.87347	24.6587	32.1946
		52.3168	-32.7461							-2.31081	25.4584	31.8341
		51.6059	-33.328							-2.69823	25.9551	28.961
		51.6203	-33.2259							-2.03374	24.8433	29.3592
		51.2405	-33.2807							-2.84357	25.961	31.8429
		51.1787	-33.8575							-2.48292	25.8671	33.6717
		51.353	-33.7651							-2.40572	23.8515	30.4461
		50.422	-33.4439							-3.03995	22.7752	33.6681
		50.4461	-33.4233							-0.147633	21.1174	34.292
		52.4142	-33.3346							-1.38557	19.9205	36.3572
		52.2989	-31.8098							-1.02337	18.7464	30.2719
		50.6502	-31.9491							-3.03695	17.2158	32.4981
		52.8821	-32.3123							-1.06888	14.783	28.8078
		52.9885	-32.434							-0.290228	13.0867	31.035
		54.3312	-33.1343							-1.89381	11.5495	27.4791
		55.7237	-31.2879							-0.413188	8.75612	26.9685
		56.8441	-30.7569							1.01426	7.92726	27.3012
		56.9283	-31.4581							2.73606	6.71828	26.3962
		57.8013	-27.0352							2.60291	3.90047	23.4258
		55.6467	-27.1493							0.968557	4.45459	25.1897
		55.4983	-26.6324							1.77136	5.47712	25.0869
		55.4646	-25.6672							0.651193	3.54396	21.8817
		53.6986	-24.3982							-0.172444	3.75075	25.7569
		53.0918	-23.0429							-2.10015	1.80132	28.3969
		52.5662	-23.3632							-3.80866	3.37975	27.1869
		51.542	-19.9375							-8.58746	-0.0485427	27.8897
		49.6116	-20.0248							-7.38271	1.04089	27.1741
		47.7131	-18.502							-9.2985	0.706195	26.0113
		-41.8059	-18.2442							-8.19109	0.0246457	25.7271
		-43.253	-16.094							-8.07876	-0.83689	24.2829
		-43.2724	-11.6901							-8.6498	-1.16311	23.1575
		-46.9519	-9.65547							-5.55502	-0.929213	22.6577
		-46.0449	-6.71381							-8.3386	-0.143555	20.9061
		-46.3269	-9.16896							-8.43209	-0.421063	19.4701
		-46.9589	-6.99182							-4.39346	0.413178	19.6654
		-47.1459	-4.70774							-3.22593	0.335295	20.156
		-45.9152	-0.859195							-2.48197	0.608078	16.8581
		-46.4491	30.2236							-4.09344	-0.411597	15.3105
		-47.3542	30.9001							-0.203718	0.156863	18.5126
		-47.8726	28.2385							0.832371	0.908648	16.9459
		-47.3365	28.9861							3.59694	-0.00135654	16.4766
		-46.3684	30.3678							5.05267	-0.324666	13.0633
		-45.8371	28.767							6.0875	0.723179	14.0216
		-48.2052	28.7818							7.45895	0.0912808	15.587
		-48.4232	29.2964							7.76262	1.51459	15.5293
		-48.9151	27.1718							11.0562	0.645326	13.5841
		-48.8783	27.025							10.062	2.53282	13.2203
		-48.4972	27.6246							11.3813	2.12232	11.6046
		-49.1458	29.8646							10.0954	4.37637	12.5128
		-50.4275	28.1592							9.78859	4.38445	12.8612
		-50.7752	28.2959							9.35773	2.59959	12.5242
		-51.2366	31.0014							9.8589	3.92429	10.4175
		-51.5184	30.6745							7.96379	3.74856	8.89767
		-50.681	30.9128							7.33264	4.09881	9.67149
		-52.1079	29.0446							6.41446	2.43149	6.73579
		-50.961	30.2583							6.34462	1.64996	9.28497
		-50.2383	31.2208							3.50342	1.5412	9.02084
		-46.6617	29.8456							4.51164	1.53083	9.09034
		-45.8167	32.4691							1.42246	-1.40903	6.80153
		-48.0025	29.2624							2.49003	-3.53459	8.472
		-46.4324	30.7087							-0.171457	-4.29796	8.34698
		-46.0977	30.5103							-4.7357	-7.68424	9.67785
		-45.6981	29.0886							-5.95979	-9.1543	10.6422
		-46.9138	56.618							-0.161693	-10.9933	10.6664
		-46.9105	54.8205							-0.801187	-11.6602	11.8077
		-48.3745	57.452							-1.98564	-11.0882	12.3973
		-48.1209	57.1174							-0.863914	-12.7195	13.3206
		-50.3448	55.4439							-1.83746	-11.7783	13.5979
		-52.3321	56.794							-5.08875	-13.1856	15.454
		-51.9594	57.524							-6.31301	-11.8249	16.2979
		-53.1144	59.7212							-7.39633	-9.83842	19.2949
		-56.1636	62.3199							-9.51126	-11.0593	19.666
		-55.5916	63.4852							-8.67603	-10.3357	19.4023
		-55.8292	64.6912							-18.1545	-10.1949	19.7051
		-56.9601	70.1821							-20.3388	-10.7211	22.2966
		-59.3942	69.3337							-16.542	-9.53505	24.4878
		-59.1901	71.5058							-17.9655	-7.8331	23.2063
		-59.4533	74.3861							-17.2923	-4.98883	25.6638
		-60.7699	73.0087							-20.3479	-5.48193	27.2876
		-60.8315	78.6345							-16.5715	-4.3785	29.6504
		-61.1078	77.8017							-16.465	-5.03616	29.4081
		-62.8447	79.8145							-20.8031	-7.56238	32.2756
		-64.3354	82.0171							-19.9642	-5.82362	33.3893
		-62.2693	82.2405							-22.1657	-5.62241	34.3115
		-64.4214	83.9728							-23.2238	-3.54396	33.0102
		-64.8697	83.5093							-21.7842	-4.76297	35.0178
		-66.1792	82.8481							-23.5436	-3.5502	32.419
		-66.4869	83.0409							-22.1064	-4.84382	33.2593
		-67.312	80.0903							-20.3805	-2.25354	32.8045
		-69.3852	78.3318							-21.5586	-2.73342	29.3273
		-70.2022	79.5117							-17.6617	-2.36337	30.4838
		-71.0004	79.565							-18.627	-0.366645	30.1181
		-73.072	78.4724							-19.8687	-2.22214	35.8482
		-72.1343	74.0285							-18.2297	0.445751	33.0306
		-73.9725	72.9724							-16.1436	-2.93803	29.2873
		-73.7731	73.6271							-17.0249	-3.1527	35.3814
		-74.8532	73.3523							-17.9562	-3.01649	30.9125
		-72.662	71.9224							-15.3268	-0.62359	30.467
		-73.015	70.6488							-16.3126	-2.83894	33.1656
		-71.7311	71.0729							-16.3637	-0.784758	30.3825
		-71.3855	71.095							-15.7202	-1.53206	33.2118
		-68.8406	72.6635							-14.5965	-2.67389	28.5895
		-68.0973	74.0898							-16.4461	-3.02186	24.1405
		-66.9246	74.2799							-15.6421	-0.579637	30.3145
		-67.2078	76.8833							-16.669	-1.39857	30.6638
		-65.6454	79.4956							-17.9852	-3.23218	25.4491
		-67.8381	85.7528							-20.7097	-1.88242	24.5007
		-68.0972	84.7784							-17.8476	-3.28975	23.014
		-68.9016	88.1272							-19.0189	-4.74788	22.5928
		-69.437	88.9598							-20.8124	-4.76962	20.2156
		-71.0392	90.656							-22.4763	-1.9865	20.242
		-70.3479	93.2014							-20.3845	-2.25737	20.718
		-69.2546	96.3728							-21.1329	1.30929	19.6736
		-70.0218	98.322							-22.6616	0.599923	19.7085
		-72.4705	101.788							-24.3953	0.198139	12.6003
		-74.7039	105.068							-21.9839	4.38113	15.873
		-74.1445	104.755							-21.7833	68.3595	17.6144
		-74.7461	111.397								67.9755	15.5658
		-74.8434	109.932								67.0958	17.0691
		-74.4121	113.423								63.2799	16.3039
		-73.0265	115.988								62.9064	15.0244
		-71.4881	118.383								61.0035	15.3215
		-72.6232	119.652								61.035	14.377
		-71.4289	121.864								56.9132	16.477
		-71.2479	122.289								57.1208	17.2155
		-71.0843	125.685								56.3474	17.3614
		-72.4547	126.281								53.0965	19.0342
		-72.4243	126.956								51.5434	18.854
		-72.6332	129.126								48.9559	21.4085
		-154.286	125.409								48.185	22.5737
		-154.34	129.607								45.8928	22.5841
		-153.004	128.611								45.5157	24.0315
		-151.396	127.481								46.6218	25.1727
		-148.754	127.628								45.6394	25.0249
		-146.88	127.33								44.4448	26.608
		-144.067	128.835								45.6268	23.0218
		-143.622	128.421								46.4858	25.6337
		-141.481	128.994								46.2956	25.6876
		-138.452	126.74								47.244	25.4513
		-138.033	126.912								46.9279	23.8072
		-135.017	126.637								47.3026	27.3246
		-133.663	127.237								47.2336	23.0918
		-130.847	124.047								46.7715	22.0925
		-130.673	125.272								46.0675	21.6731
		-128.273	121.336								43.254	21.7277
		-126.799	121.242								41.931	16.8323
		-123.615	118.614								40.9075	14.7438
		-122.363	115.834								37.9333	11.7464
		-121.148	115.549								37.6614	12.1854
		-118.547	112.857								35.9806	11.1835
		-117.858	112.277								37.2685	5.48777
		-114.343	110.926								35.3039	8.0416
		-112.181	109.547								35.1721	4.00375
		-112.193	104.107								36.4332	1.94049
		-109.743	102.746								35.4715	1.57205
		-108.32	101.296								34.4064	0.832658
		-106.28	97.6504								30.8044	1.31402
		-104.804	96.0128								33.7033	0.811491
		-102.823	89.9128								32.0688	-0.465365
		-102.17	87.6259								29.1194	-0.335373
		-101.19	87.3313								25.7737	-0.540638
		-100.729	83.8075								24.0368	-0.284154
		-101.205	82.3261								21.6311	-1.45593
		-99.3117	76.805								19.8073	-1.14191
		-99.7408	44.1011								18.7125	-1.36567
		-86.1139	45.3638								17.1325	0.568364
		-84.3935	47.736								14.7874	-1.7986
		-81.3937	45.222								12.0255	-1.15738
		-79.5337	45.799								12.4742	-0.32928
		-77.2642	46.4907								11.2109	2.0842
		-76.5228	45.901								10.5645	1.19404
		-73.4125	48.1135								9.69222	1.65432
		-72.1387	47.4823								8.68871	0.969371
		-68.6845	46.7956								8.723	1.20409
		-68.6565	45.6737								7.86689	3.47259
		-66.8275	46.4912								6.97616	1.18745
		-66.9001	45.5162								4.98956	-0.49027
		-65.891	45.1546								5.99308	1.48545
		-64.4911	45.1345								4.26539	-0.0623978
		-61.3745	46.4474								1.14121	-1.21524
		-60.1706	45.5306								1.64555	-0.694557
		-58.1761	47.0985								1.16534	-0.712097
		-55.641	44.3812								1.31998	1.29565
		-52.1477	41.4585								1.92334	-0.909217
		-47.0269	40.2798								-0.0589896	-1.54549
		142.598	36.536								0.149789	-0.506887
		139.993	34.2366								-0.548831	-2.65062
		137.957	29.2995								0.917452	-1.86957
		138.727	29.5243								-1.11443	-3.77981
		136.275	25.4457								-1.19384	-3.1462
		136.168	23.1606								-2.53361	-4.02253
		134.886	23.6104								-2.61768	-3.22576
		133.453	20.2907								-5.1515	-2.99781
		127.16	17.5543								-4.95695	-4.90203
		127.84	16.5968								-5.22641	-2.70955
		126.369	12.9048								-7.27442	-2.82505
		125.991	14.1025								-6.94437	-3.16509
		125.598	14.1466								-5.38188	-0.868935
		125.864	14.4801								-5.30552	-0.102308
		126.715	14.6588								-7.23532	-0.68919
		126.372	15.3921								-5.89954	0.509579
		126.549	13.8149								-5.76889	-1.43295
		127.699	11.2472								-6.50986	-2.2165
		128.816	11.9647								-4.24663	-2.68846
		129.079	13.0425								-5.06148	-0.125968
		128.001	14.3102								-4.11737	-0.228571
		124.842	13.6022								-3.59615	-0.700333
		123.32	14.1481								-3.17502	-3.29567
		120.74	13.314								-5.63302	-5.26608
		120.3	15.3471								-4.29613	-4.08745
		118.015	13.9094								-2.79402	-2.36413
		115.946	15.3566								-2.16944	-4.20673
		112.466	15.4655								-3.39189	-3.22471
		109.843	14.6219								-1.63353	-3.1615
		106.644	14.0822								-2.59499	-3.17803
		104.363	15.133								-2.30273	-4.73199
		101.531	14.7136								-3.67831	-5.45229
		97.5487	13.714								-0.941143	-4.90792
		92.523	16.3009								-0.724412	-6.90002
		89.3754	16.5434								0.230906	-6.79758
		84.3567	18.4832								-1.13299	-7.08253
		78.2338	20.5025								-0.872061	-7.06744
		75.8228	18.7416								-1.38002	-11.8603
		69.8572	19.3205								-2.87901	-12.4187
		-52.1757	20.8387								-3.11416	-10.7536
		-48.2127	18.1892								-4.22465	-13.6735
		-49.9175	18.5323								-7.01402	-13.4699
		-48.8034	17.3026								-7.49451	-12.0789
		-46.8166	17.7731								-7.87177	-12.1669
		-46.7427	20.4188								-10.0427	-13.6019
		-48.5961	19.6982								-8.93365	-11.7868
		-49.2177	18.8431								-8.90505	-11.9033
		-48.6752	19.5228								-8.93281	-11.2177
		-48.4197	22.4412								-9.30618	-8.40433
		-48.1995	22.8577								-8.40049	-8.50577
		-48.1339	23.739								-9.40123	-8.70352
		-45.0676	23.7514								-8.57232	-5.88411
		-47.3655	25.4907								-9.91589	-12.5747
		-47.9131	24.3963								-9.12929	-7.50246
		-47.2627	26.8273								-6.46078	75.192
		-48.3874	27.4436								-7.95996	72.2929
		-48.8249	26.3123								-8.42352	72.6786
		-48.9036	24.9178								-10.4419	68.139
		-48.131	24.2178								-9.27274	65.5956
		-49.3876	25.4322								-12.3634	63.8309
		-51.4108	23.5496								-11.5151	61.9763
		-47.8704	25.8936								-13.4366	61.0764
		-50.4335	22.8092								-13.7482	57.3621
		-48.161	21.9659								-14.3848	56.0843
		-46.1902	20.7613								-13.3588	52.3253
		-42.8773	19.7144								-14.9457	50.3832
		-43.6908	20.0494								-13.9222	46.4697
		-44.253	20.4546								-13.5277	43.9351
		-41.2205	17.2822								-12.5943	41.6641
		-39.8841	18.4643								-13.1235	41.06
		-40.0727	17.0081								-13.6291	39.2018
		-38.5855	17.4012								-11.5723	38.679
		-37.2291	17.7519								-13.2823	36.5135
		-38.2386	18.048								-12.5676	35.3949
		-38.336	15.8957								-12.2943	37.7479
		-37.3637	17.5812								-9.82301	33.8283
		-38.8202	17.2712								-11.375	33.8559
		-39.0632	13.8478								-11.3999	34.8583
		-35.9482	7.32097								-11.6089	35.7482
		-38.5213	8.28461								-11.5839	34.703
		-39.4019	92.4049								-11.9771	35.5563
		-37.0891	91.1953								-11.0536	34.0235
		-39.7029	91.0422								-11.3658	34.7021
		-37.2485	91.2616								-11.7758	36.0541
		-38.3038	89.7184								-11.7244	33.7176
		-37.9043	88.1493								-12.3158	32.7045
		-36.6449	87.5974								-13.5717	36.1619
		-36.2308	87.2878								-10.9444	31.6536
		-35.7672	87.0827								-11.8388	32.1249
		-35.8212	85.9799								-12.4005	32.7923
		-35.4524	84.4938								-11.0032	31.3242
		-34.3463	84.6946								-11.373	30.3009
		-35.1069	86.4797								-9.98743	31.2641
		-34.8613	83.41								-11.6551	27.8264
		-35.1838	84.5185								-12.1487	26.2552
		-34.4134	83.8076								-11.3327	32.231
		-34.7124	82.9139								-11.5082	31.8376
		-38.3708	82.8836								-11.2259	28.6101
		-38.4196	83.0807								-11.0255	24.3498
		-37.3961	85.6712								-11.4127	28.2568
		-39.101	83.7487								-12.9601	26.0921
		-41.5794	83.6258								-12.4274	28.183
		-41.91	83.3319								-12.8091	29.4332
		-43.6473	83.253								-15.4988	28.7747
		-44.7954	86.159								-15.2122	28.5212
		-46.1786	85.9419								-15.6324	29.0412
		-46.8939	85.8144								-17.3792	31.3445
		-46.7586	85.5683								-16.783	28.4695
		-48.1445	85.122								-17.2517	27.9404
		-48.2169	87.1649								-16.7267	27.8837
		-50.4863	87.1895								-16.3402	32.5473
		-48.6572	86.7652								-14.8565	29.3851
		-47.8878	85.2713								-13.8019	26.0398
		-49.6779	86.0667								-16.2928	26.9834
		-49.3124	86.9651								-14.3683	27.5816
		-49.0979	86.6994								-12.5993	26.5521
		-49.4173	85.8241								-12.109	28.2032
		-49.6583	86.7238								-12.9442	27.6245
		-49.242	87.4361								-14.0358	28.024
		-51.2425	88.9538								-15.0576	27.6075
		-50.9035	87.3722								-15.0097	24.8872
		-51.1358	87.7431								-16.5716	26.5509
		-49.0307	91.6847								-16.041	29.4966
		-50.847	89.5965								-17.058	27.2485
		-51.6864	91.5739								-15.3221	29.1066
		-51.0809	92.9449								-16.2948	28.9294
		-51.36	93.0263								-14.3066	29.0162
		-50.8851	91.5983								-14.4548	28.9037
		-47.3255	93.5676								-12.6711	26.0381
		-47.4362	93.0981								-12.8586	25.0912
		-50.4352	92.7942								-12.2098	23.7754
		-49.1124	94.0517								-12.1208	22.1807
		-48.4693	91.5678								-12.5832	20.613
		-49.1402	94.6699								-13.6492	19.0168
		-48.8723	95.7437								-15.2476	13.8447
		-48.2821	96.7124								-15.2058	12.1054
		-46.4798	95.1639								-16.3728	14.2255
		-46.2651	94.8141								-16.6771	14.4694
		-45.7431	94.0966								-16.1327	16.7904
		-47.619	94.1113								-17.6759	17.0375
		-53.6141	93.046								-16.8014	14.7886
		-53.6626	94.2348								-15.6754	17.2235
		-51.7608	94.099								-16.8849	17.8024
		-49.0441	94.552								-15.7011	19.0227
		-49.3026	95.531								-15.1769	18.1309
		-46.4574	90.5977								-15.6849	19.0722
		-46.7614	94.5806								-18.8576	11.9351
		-43.7092	93.3877								-17.5916	14.4687
		-45.3459	92.2285								-17.2633	17.5805
		-45.459	92.0467								-18.0336	13.554
		-45.651	91.704								-17.1511	14.2533
		-45.2512	90.7793								-17.1165	13.492
		-44.3835	89.68								-16.9654	14.2316
		-45.923	90.4307								-15.6598	13.783
		-46.9796	89.2293								-13.6258	11.2369
		-45.7997	87.3417								-12.3516	10.8837
		-42.8776	87.0355								-12.0186	9.32241
		-42.5981	86.9792								-10.7152	12.0825
		-44.0624	83.1441								-9.81936	12.5957
		-39.5615	83.7731								-11.0058	13.5819
		-43.4953	81.4496								-10.2015	15.1076
		-40.5585	78.9713								-9.93263	16.6982
		-40.7572	78.3993								-11.9654	16.0815
		-32.5525	81.4166								-12.8047	17.7288
		-35.319	82.4448								-12.9512	9.91902
		-34.3794	79.7206								-13.3747	8.54658
		-34.4622	82.1737								-14.0368	8.65875
		-34.4151	80.7857								-13.5122	5.23828
		-30.888	81.9462								-13.3016	4.41818
		-31.0984	81.8668								-13.5417	4.98121
		-32.8512	79.8197								-17.2571	4.7484
		-32.272	80.7634								-15.1157	6.11186
		-33.563	80.7587								-16.7011	4.4672
		-31.2597	82.1887								-13.6198	4.53568
		-32.7908	80.6298								-13.9945	5.5873
		-30.8363	80.4475								-14.9857	8.66472
		-30.7939	79.5012								-11.1199	12.217
		-29.1352	77.6574								-13.4864	12.6563
		-30.3372	78.95								-13.1338	13.6078
		-30.8863	77.5896								-13.6914	11.9485
		-29.1766	75.4682								-13.4284	15.5482
		-26.6539	103.833								-12.5319	11.5207
		-27.9124	104.486								-13.825	9.90992
		-27.836	105.015								-13.2075	8.53295
		-26.5439	105.079								-14.0817	7.63215
		-23.7299	106.115								-15.2277	7.78767
		-22.9993	106.246								-15.1679	8.43084
		-20.4955	106.348								-14.04	7.43362
		-19.104	108.537								-13.6133	7.36321
		-16.9731	108.694								-13.862	9.29891
		-13.894	107.825								-14.1589	8.93824
		-9.19272	107.877								-12.847	6.42564
		-6.50768	108.283								-12.1664	5.95834
		-0.880691	105.955								-10.7884	5.83401
		1.26383	107.604								-9.23379	5.7144
		6.33581	108.271								-10.4702	1.93554
		8.34647	108.345								-8.58667	3.90414
		11.0594	105.872								-9.23273	4.24897
		16.51	105.891								-10.1975	1.31507
		17.0506	104.556								-9.78309	1.64311
		21.507	105.065								-11.8902	1.77004
		19.9455	105.454								-11.4477	0.119569
		23.6154	106.213								-11.1306	0.147328
		28.3267	106.254								-10.8973	-0.0886889
		34.8988	106.371								-12.5569	5.13646
		35.5225	106.341								-12.4182	3.60327
		36.001	106.967								-12.1013	7.32032
		40.9866	0.728257								-9.21762	8.61362
		36.9968	1.7115								-9.57457	10.4826
		36.4791	-0.0610341								-8.92083	11.2402
		24.2797	-9.99852								-8.70222	12.0958
		22.1866	-8.38004								-8.83162	15.5973
		22.1243	-10.4657								-9.0925	14.9564
		21.3294	-8.84045								-9.91436	16.7219
		20.6034	-6.65805								-8.87419	20.2622
		18.8633	-6.58967								-4.52811	19.3896
		18.5582	-5.92326								-7.77772	16.0298
		18.6314	30.1203								-8.14244	18.9743
		18.7997	27.4252								-7.90363	18.9377
		16.8779	26.1491								-8.04409	18.0269
		14.288	24.8144								-9.92605	18.1213
		14.5356	26.5816								-9.35969	15.7725
		13.3721	27.4292								-8.98088	18.2822
		12.9438	28.7276								-9.99787	14.9536
		12.0514	28.7247								-9.59459	16.9425
		12.1503	30.6431								-12.5442	18.1626
		12.6546	33.2958								-11.6284	17.298
		13.7939	34.3266								-13.4908	18.0655
		14.9947	33.1705								-12.896	16.5942
		16.6776	33.9403								-10.761	16.2077
		-27.7864	34.2849								-10.4108	14.4601
		-28.4793	34.9718								-8.99924	14.1841
		-28.7185	35.3485								-7.64962	13.7372
		-29.6216	36.3001								-8.12194	14.0988
		-28.8254	35.0485								-7.90111	11.9094
		-27.0514	36.4971								-5.45045	8.36261
		-26.9131	37.8062								-4.69905	8.63
		-27.2916	36.9669								-9.06847	9.60332
		-28.1784	36.3259								-8.45917	8.41523
		-27.8283	35.3336								-9.31443	6.27006
		-27.8133	35.8843								-12.8327	4.23739
		-30.2352	35.214								-12.2666	6.7013
		-31.1437	35.7565								-14.1754	8.51968
		-32.3686	36.299								-13.3403	7.26184
		-34.5814	36.5606								-13.3755	7.11545
		-34.2514	36.9292								-11.9303	6.2591
		-36.6575	36.2781								-12.7745	6.40098
		-37.0004	36.8746								-14.5273	6.47535
		-39.9727	36.0223								-14.7911	7.72975
		-41.2303	35.2847								-12.4651	10.7742
		-42.9417	35.7078								-9.50427	11.5674
		-45.1822	35.0936								-9.26831	8.97427
		-48.5	34.6458								-5.52725	5.31085
		-48.978	34.2333								-11.036	7.74952
		-48.9168	34.5694								-10.537	6.49526
		-48.4316	34.2709								-11.1042	7.73684
		-48.7137	34.9323								-10	5.16812
		-46.8154	35.1303								-9.56361	7.42203
		-44.1873	34.7525								-13.8951	5.08586
		-42.5272	34.742								-11.3004	4.84973
		-39.925	35.1224								-10.8444	8.08797
		-36.5946	35.2016								-16.0742	5.63693
		-32.1968	33.6627								-14.6151	6.54478
		-27.7132	34.9132								-19.3087	8.34943
		-24.1321	33.6475								-16.1206	7.95709
		-19.9898	34.3668								-17.8512	7.83109
		-17.7449	35.0553								-17.8846	8.2677
		-16.0311	35.4632								-19.4691	9.5602
		-12.5914	35.5817								13.8205	10.6347
		-9.72434	35.6992								12.1392	7.74073
		-6.89046	35.4033								13.3873	9.4246
		-6.2461	35.6777								12.732	10.29
		-6.00232	36.5797								12.9018	8.70062
		-4.04624	36.3975								12.3642	7.86857
		-4.46968	35.6886								11.7147	7.08244
		-2.40867	35.3593								12.4273	6.79263
		-5.08533	35.6077								11.0858	3.58712
		-1.82675	34.6706								11.2855	5.82549
		-0.5069	34.3004								8.8311	5.36059
		-0.0219571	32.8013								8.53687	3.79953
		3.82386	31.3378								7.7761	4.1051
		6.86389	32.611								7.81996	0.750622
		11.891	28.6395								7.15102	2.49072
		17.2241	27.7657								7.0112	1.08283
		21.6542	26.1364								8.06928	2.88698
		54.7413	24.0683								5.49951	6.28553
		57.0691	23.8999								8.09356	6.83514
		56.5013	23.4704								7.82751	5.25053
		56.1673	24.2826								8.02683	7.95336
		54.9868	24.9834								8.80706	7.47442
		54.3775	26.6804								8.67974	11.343
		52.5889	30.5484								8.61494	8.31165
		52.3332	28.9784								8.75398	11.4389
		51.0504	31.2031								6.32896	10.4713
		50.4138	35.1525								6.23086	10.2649
		50.57	33.5319								4.50901	11.5317
		49.2956	33.9629								3.10636	9.99
		49.4236	33.4339								4.6389	11.4224
		47.5133	31.2198								5.24404	9.11679
		44.5587	34.1803								4.62118	8.70677
		43.6007	32.8667								3.00038	9.25171
		42.9616	31.8949								2.91297	8.15439
		42.6045	35.8665								3.55652	8.15737
		42.6547	33.2608								1.40451	4.47287
		44.041	33.7308								-1.06619	5.33925
		44.8446	32.0566								0.201121	6.44908
		44.743	32.9479								2.00025	3.22839
		49.7102	32.8672								3.22217	3.79515
		49.2786	34.3194								2.63695	8.22715
		51.4439	28.9553								3.2036	9.51497
		47.7988	28.0593								2.41962	6.93217
		46.8829	30.5056								2.82822	6.42231
		45.345	31.2944								1.31329	4.64398
		47.6195	32.0022								-1.61452	7.64189
		41.5154	32.2212								-2.40521	1.8011
		35.8076	35.493								-3.95409	1.23693
		35.7597	38.0557								-6.40902	0.920653
		32.9034	38.7374								-7.11095	-1.59679
		31.2387	127.45								-6.84269	-4.54552
		27.5139	129.094								-6.84727	-5.04073
		26.0274	127.56								-8.69849	-8.17287
		25.5059	127.181								-7.54681	-8.65366
		22.9638	128.904								-6.03157	-10.3022
		20.7041	127.082								-5.41311	-9.80375
		-77.7677	125.916								-3.69877	-8.09544
		-80.7657	128.122								-4.25092	-10.3088
		-80.8722	129.841								-4.07775	-7.7866
		-78.038	127.894								-1.86045	-10.9047
		-75.874	127.938								-1.83716	-8.00655
		-75.9921	130.13								-1.73604	-6.81594
		-76.1671	127.186								-1.46542	-3.42867
		-71.101	126.717								-0.79209	-7.13714
		-67.6298	127.005								1.58568	-4.34201
		-65.7214	127.033								1.39315	-4.89533
		-60.3822	126.624								2.10916	-4.90551
		-57.744	126.1								1.7607	-7.3753
		-54.1288	122.717								2.71003	-5.06943
		-51.7967	121.447								2.63458	-4.39754
		-46.8606	125.975								-1.28677	-9.07468
		-44.6533	129.431								-1.51392	-5.79113
		-41.6585	120.504								-0.661793	-6.53931
		-40.2903	125.393								-2.94222	-6.87801
		-39.9491	121.686								-3.80329	-6.69276
		-37.9408	123.489								-4.11964	-8.53703
		-37.9063	126.653								-2.46144	-8.27694
		-37.144	121.933								-4.13992	-8.02368
		-38.578	127.878								-3.96089	-8.57907
		-38.0011	120.559								-2.95004	-8.47018
		-38.2428	121.895								-2.55615	-7.99066
		-38.7997	126.924								-2.22328	-6.0755
		-38.1358	128.134								-2.29004	-6.31205
		-37.0444	117.357								-0.916472	-5.49125
		-36.6671	118.692								-0.28565	-6.66367
		-34.4578	117.41								-1.05227	-9.15636
		-34.3334	116.627								-0.637553	-9.15342
		-34.2569	114.532								-2.06953	-10.6846
		-32.332	113.634								-1.55722	-11.7955
		-31.3445	115.712								-3.83958	-10.5094
		-30.4136	113.144								-4.31765	-11.2641
		-31.932	112.873								-5.39613	-11.4825
		-32.1897	113.883								-6.31319	-11.3334
		-32.2823	112.829								-5.38384	-13.2782
		-32.097	115.918								-7.45419	-14.4677
		-33.8937	117.982								-6.31142	-12.4771
		-31.5593	120.822								-4.26067	-11.8888
		-29.3768	122.497								-5.87309	-12.0579
		-26.8041	122.42								-4.35834	-13.7553
		-23.2871	124.047								-3.12411	-12.644
		-18.703	126.037								-3.99474	-12.0219
		-15.2964	124.6								-5.29242	-12.1239
		-11.0476	126.467								-4.26682	-9.4667
		-7.5996	125.353								-2.80529	-11.5823
		-5.69189	123.289								-2.07596	-12.2475
		-2.23563	121.69								-1.10309	-13.8775
		0.446935	118.581								-2.1741	-12.9205
		2.49814	117.856								-1.95889	-15.3854
		3.28057	118.9								-4.10112	-17.9525
		5.57726	117.152								-4.07817	-17.869
		9.27004	118.886								-3.18535	-19.6993
		10.3061	118.505								-6.27484	-22.0181
		13.572	117.333								-5.29105	-23.1582
		19.7174	118.89								-4.14416	-26.272
		23.5792	119.434								-6.47699	-32.362
		27.8467	119.925								-4.67287	-29.7087
		33.055	119.963								-7.13719	-32.4204
		34.6418	121.2								-4.18541	-31.79
		37.647	121.303								-4.75375	-31.6431
		40.3436	123.854								-4.99469	-32.077
		41.9043	123.175								-5.56239	-30.5373
		44.7906	123.076								-7.47299	-29.0837
		45.9689	121.978								-7.76056	-28.3913
		47.8563	122.079								-5.33947	-26.1115
		49.1996	120.871								-6.5025	-26.1493
		49.7009	119.491								-5.57507	-25.2862
		51.7474	118.516								-4.98163	-24.7883
		54.5345	116.038								-9.40951	-23.6428
		52.6395	113.633								-7.84709	-23.8524
		55.1412	111.414								-7.00509	-23.4132
		55.1277	110.83								-7.08872	-20.683
		57.4997	110.189								-6.26375	-20.2609
		59.3756	111.375								-4.34608	-19.6015
		60.2977	108.806								-4.49893	-19.213
		60.881	110.515								-3.28918	-17.8701
		64.6904	108.752								-2.48208	-17.4524
		65.394	109.479								-0.545141	-18.0823
		66.6066	107.901								-0.796829	-17.3086
		69.3171	110.355								-1.30313	-15.9769
		69.3478	107.256								-4.2053	-16.222
		70.3792	106.719								45.7817	-15.9934
		68.809	104.418								44.7128	-15.8
		66.9837	100.955								42.5805	-17.9652
		63.0376	101.127								42.1155	-17.0092
		61.0248	96.6868								38.8813	-16.4752
		59.3413	95.9392								38.1663	-16.89
		58.4578	92.804								37.0635	-19.215
		55.1404	88.2149								37.2153	-13.2256
		53.7908	83.6893								37.0004	-12.5826
		53.6766	81.3529								36.9175	-12.7752
		50.4631	78.2972								37.5367	-10.9453
		49.2254	-98.836								34.1408	-10.8703
		50.3094	-99.7806								33.1957	-9.41152
		49.3934	-99.4835								33.8515	-9.39236
		49.8179	-98.7865								29.7959	-11.1018
		47.0608	-100.564								27.5647	-7.0095
		46.39	-97.7195								27.0121	-9.3618
		-36.255	-99.4421								25.2139	-6.69029
		-34.5092	-97.3283								24.5116	-9.00098
		-32.4023	-96.4147								22.4768	-7.96172
		-5.61204	-96.8415								22.973	-8.36795
		-8.81322	-95.0085								20.6915	-7.14816
		-9.01041	-95.0914								20.31	-7.61981
		-8.33671	-93.0782								21.6074	-7.63603
		-8.04659	-92.5262								19.6446	-6.42043
		-6.57827	-90.6052								20.9012	-9.40864
		-6.39081	-90.3656								20.7292	-6.87634
		-7.93457	-91.3547								22.5552	-10.1901
		-6.2915	-90.9128								22.5954	-8.33662
		-7.2221	-90.8197								23.4923	-11.9691
		-6.18796	-91.0138								22.5443	-9.58195
		-4.44671	-91.7109								24.5113	-9.74226
		-5.1723	-91.9388								23.4183	-7.83359
		-1.30392	-93.8322								22.9004	-11.4594
		-1.8245	-92.8672								22.7692	-9.96526
		-1.49885	-90.583								22.5628	-8.87633
		-158.055	-92.0208								22.957	-8.24416
		-156.185	-97.5502								20.206	-8.37835
		-154.555	-98.7616								19.5058	-10.064
		-151.712	-100.55								19.8846	-8.34427
		-151.401	-97.4612								18.3969	-7.05595
		-148.919	-98.4455								17.3915	-10.2442
		-147.611	-100.776								15.5561	-7.59642
		-146.703	-103.587								14.6825	-9.73387
		-145.333	-102.746								14.5097	-10.8825
		-144.608	-101.65								13.7675	-8.83234
		-143.085	-104.566								11.4205	-7.36295
		-143.403	-103.559								11.3347	-9.74931
		-142.423	-103.576								9.99945	-10.0626
		-140.344	-103.096								10.782	-11.1608
		-139.164	-103.505								9.97637	-9.77438
		-137.515	-103.059								8.74869	-6.71824
		-137.62	-102.582								7.70633	-9.04897
		-136.087	-101.1								10.0983	-9.31432
		-133.391	-100.773								9.83338	-9.0188
		-133.084	-100.236								9.25587	-5.81609
		-132.405	-101.317								8.3702	-7.05967
		-131.189	-95.5529								9.6348	-11.3817
		-128.655	-95.775								10.466	-9.32404
		-128.102	-95.3002								10.7269	-8.14491
		-129.465	-95.1647								10.2468	-7.59069
		-129.652	-90.7918								11.9485	-5.60816
		-122.575	-88.8961								13.0751	-4.46594
		-120.892	-87.3694								13.6087	-6.91878
		-120.048	-85.6237								14.145	-9.15343
		-120.273	-83.2712								12.2149	-11.227
		-120.061	-82.4559								14.0291	-13.0925
		-118.576	-77.9355								16.4885	-12.3829
		-118.252	-75.9936								18.8968	-7.99788
		-114.933	-77.3861								19.8612	-12.5949
		-113.34	-77.1867								20.6032	63.2421
		-110.829	-75.718								21.1656	61.5356
		-108.786	-73.8925								21.8895	60.8626
		-106.111	-74.8795								22.2978	57.9382
		-103.472	-71.8273								21.7314	53.5594
		-101.183	-75.2222								21.3462	48.9943
		-99.5662	-74.2165								20.575	43.3902
		-95.7758	-76.4841								19.4137	39.9851
		-94.6515	-78.0298								17.7109	39.3069
		-93.5856	-76.2357								18.8023	38.5478
		-92.4952	-73.6835								15.9573	35.3825
		-90.6393	-76.1791								14.496	34.1146
		-91.264	-76.0229								14.7908	35.8813
		-91.4586	-76.0057								13.4491	32.6767
		-91.7514	-78.1924								14.1103	33.3683
		-93.5242	-75.8614								14.6207	35.1817
		-94.6045	-74.5209								15.6129	35.3474
		-95.3258	-78.2864								15.3091	36.1159
		-95.3175	-78.182								17.633	37.5701
		-94.6064	-76.6948								15.8482	36.8948
		-94.3213	-77.0059								16.3495	34.8399
		-94.1554	-76.1384								16.3387	38.07
		-90.8971	-77.8381								16.1043	37.6539
		-90.831	-77.915								13.5416	38.4536
		-87.3181	-78.199								15.6923	38.1983
		-84.4114	-78.0892								14.5277	37.3979
		-84.2807	-77.6585								14.8728	37.9847
		-23.956	-78.3836								12.3522	38.2241
		-24.2417	-79.4464								14.5562	37.3571
		-24.2584	-79.4816								14.0925	37.6224
		-26.4504	-80.667								13.5482	39.8473
		-33.2571	-80.0441								13.2181	40.7186
		-36.433	-80.8223								12.5074	41.7206
		-40.8431	-79.8079								15.4541	40.831
		-46.0089	-80.1766								14.8169	41.4946
		-44.1505	-80.7461								14.6415	41.2288
		-45.395	-75.3454								14.7963	44.3847
		-57.0146	-77.4644								13.8082	41.2013
		-59.8905	-77.9858								14.3927	42.2648
		-71.5691	-76.9294								14.2979	41.748
		-74.2188	-79.0866								13.5329	44.0479
		-82.2838	-77.4993								13.4124	42.7641
		-83.9124	129.946								13.9775	43.5371
		-89.9145	130.367								10.7704	44.5046
		-89.713	129.117								10.9249	43.5241
		-93.4581	126.539								10.8344	44.2923
		-95.8581	124.173								7.66363	44.0562
		-96.3795	122.489								7.42045	45.6574
		-97.1505	122.279								3.96476	45.2542
		-101.1	121.161								5.03866	47.2351
		-101.313	117.442								3.14924	47.56
		-100.053	111.464								4.45351	47.5047
		-107.525	109.506								2.8645	47.6702
		-97.7038	109.964								3.677	47.7789
		-96.2673	112.764								2.8292	48.2604
		-103.14	107.651								2.37783	47.0917
		-106.04	107.911								4.78938	48.7901
		-113.029	107.2								2.09409	50.2519
		-111.895	109.584								2.26193	48.7306
		-112.199	108.066								1.87666	53.2646
		-92.3905	106.6								0.913444	51.0089
		-93.2887	109.48								1.12768	52.0551
		-98.4976	102.433								1.8475	50.7857
		-89.862	104.897								2.90888	52.0788
		-89.8716	102.838								1.9784	50.0994
		-92.5971	97.398								2.50698	51.197
		-88.0638	102.384								1.95368	49.3532
		-86.6792	99.4747								1.64718	48.72
		-85.2715	97.3819								4.76889	47.9359
		-87.5043	94.2057								3.62927	52.3888
		-82.5921	92.7792								6.48864	53.5257
		-83.9743	92.9077								5.42176	45.703
		-82.9134	87.0592								5.19136	46.9789
		-81.6341	86.0925								7.12644	45.9109
		-82.0527	83.4677								7.38468	44.5723
		-78.8306	81.5039								7.45204	44.5748
		-78.9901	80.1452								4.70276	44.585
		-83.0954	74.0868								7.95794	42.5173
		-81.9875	70.9329								8.2615	43.2104
		-79.7087	70.4512								6.19391	40.7986
		-81.338	67.5467								7.19983	40.4842
		-82.462	66.3632								4.10425	36.9509
		-82.2262	64.5375								4.01299	35.7106
		-81.4143	61.3461								3.51789	35.3485
		-81.9562	59.1996								3.47284	36.3048
		-82.1009	57.8182								1.00372	31.9377
		-81.2061	55.9687								2.26281	33.7983
		-80.8361	54.5054								2.01652	34.2832
		-79.8565	52.5829								4.18869	35.0038
		-79.1321	51.6794								3.22345	33.137
		-79.2859	54.305								2.60895	34.9335
		-78.5199	52.0119								3.85663	37.6496
		-76.0098	51.7159								4.45792	37.3376
		-74.1304	51.8832								4.32626	39.4829
		-74.2453	52.6922								5.9722	39.8834
		-74.2524	50.9929								6.40731	38.106
		-74.1109	48.6552								5.88538	39.4021
		-73.8356	49.2837								8.17964	42.4479
		-73.9395	47.3847								6.12253	41.9345
		-75.1384	47.766								8.11195	43.2974
		-74.0134	47.9896								5.37553	43.8934
		-74.8394	45.8867								7.62156	42.8516
		-74.5142	48.5567								6.96721	43.0219
		-73.8502	48.0821								8.11042	44.4485
		-73.7913	47.329								10.181	43.471
		-74.2689	45.9677								8.38038	42.7699
		-78.0318	46.6021								10.2256	44.1614
		-79.8256	45.4152								8.11275	46.2736
		-76.4502	45.4993								7.91659	44.1557
		-75.8361	46.8171								8.62167	47.6886
		-74.9785	44.4415								10.4205	48.0386
		-76.393	44.3744								11.7022	44.8033
		-71.4539	44.5287								12.7863	48.2034
		-61.5675	44.9574								11.9414	50.3238
		-59.2854	45.0382								13.7816	50.6123
		-59.5341	47.5689								15.0284	53.6767
		-53.7122	47.6989								16.2043	52.4711
		-53.2044	49.1182								14.4414	51.117
		-48.8881	49.4721								16.5988	51.6609
		-48.8033	49.0082								17.1764	47.8928
		-44.4779	48.799								16.9739	50.8298
		-42.6379	49.5717								17.0035	44.4931
		-59.223	49.7111								18.0964	44.5351
		-60.0847	50.4879								16.9832	46.1354
		-60.3011	50.0503								18.3019	49.4926
		-61.4533	49.8765								15.2065	44.0191
		-60.6733	51.3204								14.6607	44.1475
		-64.7787	51.3455								12.81	41.3717
		-63.9385	52.1023								13.3175	39.2736
		-65.3726	52.9381								12.8176	42.3171
		-66.9328	52.493								13.0193	39.7624
		-67.6869	52.4568								12.9972	41.6091
		-69.7715	53.3756								13.4975	41.274
		-69.9496	53.4435								14.5798	38.3897
		-71.5821	54.9516								13.9836	41.2203
		-72.4949	53.8923								13.283	42.3063
		-73.145	54.8789								14.9465	41.666
		-73.9264	54.7749								16.5714	43.4904
		-73.6751	54.5552								17.6365	40.542
		-76.5042	54.4778								16.3181	43.1858
		-77.2054	54.1633								17.0124	40.0743
		-75.5868	55.2173								14.3022	41.1111
		-75.9425	56.0458								16.4383	39.7742
		-76.7521	11.6244								16.3761	42.6193
		-76.7338	11.0769								16.0884	42.0463
		-76.6	11.5423								16.9468	42.0534
		-76.4785	10.5056								15.2154	40.6686
		-75.3752	9.34516								16.6345	40.5594
		-75.3249	11.0086								17.9888	42.6359
		-75.4254	13.2373								15.8868	48.6427
		-73.3544	15.4819								17.3838	41.8727
		-70.8341	15.6649								12.9222	44.1224
		-69.0721	19.1205								15.5767	49.033
		-66.7824	17.7665								14.6799	45.6562
		-67.8438	20.6505								14.6526	44.6861
		-63.1102	24.3722								14.5396	44.8109
		-60.6425	26.7254								15.186	46.2872
		-61.3339	29.0504								14.9352	48.7219
		-58.6701	28.9024								15.5435	46.0409
		-57.7978	34.0223								15.3411	47.305
		-57.8697	36.2995								17.4141	47.3096
		-59.3651	39.6485								17.0557	46.5982
		-60.1195	40.8193								17.2592	47.0518
		-59.7558	42.5753								15.8734	49.6437
		-60.565	44.4542								18.3797	48.0417
		-62.6879	47.2287								18.9276	50.6089
		-62.8858	51.1599								16.4041	52.0323
		-63.0318	51.9391								18.3447	53.5614
		-61.6765	53.2483								15.5144	45.535
		-62.047	56.8981								16.6907	52.4355
		-62.3598	56.755								14.9177	55.1613
		-59.9261	57.2181								12.8498	54.9612
		-61.1352	59.9736								15.567	53.3133
		-60.1251	63.6648								16.2072	54.1764
		-60.6828	64.6507								15.3198	52.0472
		-60.333	71.0745								13.3226	49.113
		-60.6523	72.5698								18.2147	57.1641
		-61.5606	71.2994								12.0207	54.9348
		-62.7157	71.4662								11.575	56.6218
		-63.7359	72.3159								12.4017	55.7798
		-65.6055	73.9673								14.0432	49.9534
		-64.0058	69.6621								13.0635	52.4573
		-66.5182	69.4857								10.4535	53.1617
		-67.4334	77.3209								12.958	51.2524
		-67.6306	78.1963								15.7071	51.594
		-66.532	77.7189								9.559	50.7246
		-66.9645	76.9466								14.0158	47.4706
		-68.3405	77.9924								15.2466	47.6662
		-65.7384	79.3739								-72.3287	42.752
		-67.7346	81.037								-73.6167	49.3541
		-67.4029	75.7895								-74.2446	43.7869
		-66.9762	78.4465								-74.8768	46.3887
		-64.9977	78.6053								-76.4774	43.4278
		-65.5749	80.0369								-74.4432	42.1017
		-67.85	81.574								-73.1724	41.8547
		-66.3985	83.7115								-73.0303	43.6305
		-68.3884	86.9355								-70.3095	42.0844
		-67.4797	85.4018								-67.5739	42.9376
		-69.3383	86.3363								-65.5043	45.3509
		-68.6399	87.1547								-61.7618	44.5211
		-68.6156	88.2323								-59.2829	43.1216
		-69.9267	89.1001								-55.4606	44.3222
		-70.7505	89.6065								-50.0752	56.446
		-71.7224	89.131								-47.5352	54.9187
		-70.7558	89.1495								-40.6929	54.1709
		-69.5767	93.8457								-39.6609	52.4098
		-70.7192	94.6391								-40.1046	51.521
		-70.3479	96.5686								-35.9322	47.0782
		-69.537	97.6446								-37.896	45.3451
		-69.5177	97.5896								-36.5494	36.8581
		-71.5022	98.4498								-35.7234	37.6055
		-71.8452	99.0399								-35.2763	33.5206
		-74.1578	100.41								-35.6908	30.9954
		-73.7371	100.087								-34.9413	21.5991
		-72.9222	100.752								-37.075	21.6969
		-72.9108	102.491								-37.4114	21.6693
		-73.139	102.692								-35.2171	20.8706
		-73.9513	101.993								-36.7498	21.505
		-71.3027	102.01								-36.6685	21.4333
		-69.6889	101.189								-35.0573	19.1874
		-69.5993	102.685								-36.6446	18.0406
		-69.1404	101.547								-34.0794	16.5816
		-65.9018	101.915								-34.9859	15.6663
		134.131	101.295								-33.7825	18.0832
		133.662	100.618								-32.5248	15.5857
		133.986	103.605								-30.7223	19.2991
		133.456	102.338								-33.0727	18.7924
		135.018	101.081								-31.5003	19.3702
		132.774	99.7171								-30.9227	18.0051
		135.322	99.362								-30.96	18.3966
		134.07	100.896								-31.3119	17.1188
		134.799	101.94								-32.3938	17.2235
		134.149	101.733								-32.3498	12.5025
		135.072	100.832								-31.2749	17.1485
		134.046	98.3948								-33.2549	12.9979
		133.045	96.9078								-32.9205	15.6701
		132.063	98.1099								-31.6404	18.3012
		131.916	96.4201								-32.0371	14.652
		131.574	87.5736								-32.0272	14.4977
		132.536	89.9988								-32.5596	14.9436
		130.323	87.0311								-31.7122	17.1358
		129.63	87.4609								-33.0332	16.4389
		129.669	85.9662								-32.0188	20.1866
		128.051	86.4403								-33.6676	17.8319
		127.815	-82.1902								-33.7648	15.4999
		130.369	-82.0315								-33.1475	14.7156
		127.126	-81.4088								-33.1593	13.8295
		126.301	-80.2646								-34.3207	15.1773
		124.35	-79.2378								-36.1202	17.2564
		123.059	-79.9114								-35.9824	16.7253
		121.641	-78.6169								-34.8044	18.9578
		120.038	-78.7121								-34.7109	19.8666
		116.645	-76.7511								-36.2865	21.0427
		117.55	-77.9108								-36.7787	20.0592
		114.778	-77.4921								-34.749	20.2545
		110.235	-75.8602								-33.7177	18.131
		109.048	-75.5907								-35.56	18.0702
		106.147	-75.5851								-33.4978	16.8161
		103.052	-73.8538								-33.6458	13.9704
		99.5689	-73.7779								-35.9619	11.8708
		94.9635	-74.9584								-35.3392	11.1132
		93.0393	-73.1851								-38.8921	9.91861
		90.2268	-74.586								-40.2709	5.18636
		85.424	-73.6369								-40.2567	6.91696
		81.9507	-72.7714								-42.9754	5.6189
		76.598	-73.6137								-44.6171	5.7066
		73.1584	-70.3798								-45.857	5.43608
		-48.9962	-70.831								-45.0428	6.78996
		-49.104	-71.0979								-46.4983	7.07676
		-48.0602	-71.8094								-45.7202	6.30153
		-49.4548	-70.7264								-46.6177	8.5682
		-48.696	-71.8968								-44.4687	7.64935
		-47.8795	-71.8131								-44.6363	10.1107
		-48.4054	-71.5219								-42.4241	12.3243
		-48.2736	-71.3929								-39.6291	12.4102
		-47.9143	-70.3235								-38.6933	14.4573
		-48.0151	-70.7808								-35.5395	13.8529
		-47.225	-70.702								-34.1417	16.2379
		-47.8983	-72.9529								-30.8653	14.269
		-47.1454	-70.6161								-28.8274	15.1468
		-43.1005	-73.7474								-28.7072	18.1021
		-42.9896	-73.7899								-26.0217	17.6536
		-41.2331	-75.2064								-25.8894	18.9076
		-39.4975	-75.6679								-22.9261	20.4315
		-37.6598	-76.6989								-21.9851	20.0429
		-36.5931	-77.2324								-18.8433	20.9949
		-33.7515	-77.5732								-19.7748	22.1704
		-32.6724	-79.3384								-19.6828	24.8163
		-32.4843	-78.4773								-16.9421	21.9207
		-33.2188	-79.1054								-15.7173	27.3022
		-31.8102	-77.8109								-17.6108	27.9668
		-32.7111	-80.2006								-14.9001	26.0775
		-30.8738	-80.3049								-14.0113	26.9036
		-31.7816	-78.7594								-11.7696	25.8143
		-32.3866	-81.1785								-11.2212	26.4662
		-31.6933	-80.7736								-10.6932	24.1019
		-31.4545	-80.5458								-11.7317	27.0248
		-32.0653	-80.9776								-10.3176	25.785
		-35.6928	-80.655								-11.1466	29.5421
		-34.3318	-82.3264								-10.1974	26.89
		-37.0375	-81.7612								-10.9003	26.7543
		-36.2338	-83.27								-12.034	23.7459
		-38.4172	-80.855								-12.1484	23.0758
		-37.3197	-81.279								-11.4581	19.6005
		-36.9114	-80.1098								-12.5712	17.9024
		-37.6586	-79.4565								-10.4467	15.9351
		-37.1032	-78.7052								-10.7754	15.3062
		-37.7377	-78.4048								-9.03348	14.0162
		-36.4248	-76.4923								-9.67753	11.9146
		-35.3969	-75.8878								-5.99058	12.0484
		-36.6606	-77.1835								-6.51046	9.79305
		-36.8861	-74.3284								-6.1139	10.3842
		-36.8549	-74.9623								-4.49918	10.0269
		-35.8661	-74.1577								-5.03614	9.24363
		-37.4093	-73.5701								-2.73192	8.79863
		-37.225	-73.6813								-3.96707	8.08157
		-36.9116	-71.7315								-4.02311	6.47244
		-37.5141	-72.0799								-3.96329	8.23156
		-37.8969	-71.9121								-3.40481	9.15639
		-37.6709	-70.1673								-2.12217	8.81838
		-36.2903	-70.5949								-5.09249	9.35192
		-37.3269	-67.8758								-4.26815	8.93245
		-35.3925	-67.0016								-3.74502	9.18365
		-34.4026	-66.4616								-4.20521	7.25745
		-33.7621	-68.8003								-2.80225	6.89978
		-33.0015	-69.1786								-4.33046	9.01801
		-32.2245	-69.1884								-2.25421	7.36803
		-31.6864	-68.8948								-1.94373	10.495
		-29.7241	-68.7581								-0.833402	8.73794
		-30.9746	-70.3677								-0.200359	9.535
		-31.0033	-69.3853								2.96409	8.94406
		-29.9964	-69.9442								3.31276	11.002
		-30.5461	-68.0491								3.3577	9.97887
		-31.4089	-68.9474								4.69759	8.89324
		-32.2211	-67.4845								6.56679	9.12818
		-33.8229	-67.3663								6.31839	7.87482
		-36.2541	-66.0285								6.36383	9.58734
		-35.9291	-70.8215								10.3225	6.44626
		-37.8782	-68.2814								9.90425	7.81982
		-38.9555	-68.5514								10.2853	10.2069
		-40.6912	-71.1561								10.9576	5.29058
		-42.5542	-70.9773								10.6748	2.7297
		-44.147	-71.6845								9.81972	2.4088
		-44.3658	-71.3486								11.442	-2.42072
		-48.6589	-73.6514								9.09182	-0.1913
		-48.6061	76.5823								12.3085	-1.78046
		-50.1728	72.1881								10.3557	29.8032
		-51.6743	73.0302								10.0215	33.1726
		-51.8597	64.55								9.88238	32.5248
		-51.3247	66.6672								10.6124	27.6944
		-51.3842	66.4014								7.27453	29.4449
		-50.9874	70.3551								7.57103	29.7269
		-49.9332	66.9004								8.53539	31.2104
		-52.5784	65.5915								10.7154	29.9485
		-52.4923	66.1093								13.6086	29.3104
		-52.4437	66.5202								10.5602	27.4476
		-53.2301	64.9524								11.3547	27.2265
		-54.3727	63.4144								10.0492	27.8136
		-55.4387	63.8643								10.8275	27.758
		-56.3816	69.6085								12.696	27.2241
		-58.9093	63.909								10.8399	29.0831
		-59.4887	63.8705								10.948	27.979
		-59.6871	61.5762								11.4832	27.9774
		-59.8572	62.969								11.0004	27.2681
		-60.5414	61.6802								12.0966	27.8029
		-59.5262	60.9953								14.8852	27.4604
		-59.565	62.5996								14.9155	27.7231
		-57.8626	59.2145								14.9181	27.5741
		-50.6906	59.0296								15.0631	28.7508
		-50.5369	58.1475								14.8858	27.8033
		-52.0125	56.7879								17.3953	29.5351
		-51.844	56.3829								16.4634	29.3116
		-49.0406	56.6003								18.5082	28.9751
		-50.2642	55.0088								-46.9098	29.5775
		-49.4748	52.4382								-43.5994	29.5699
		-50.4522	51.1876								-38.654	28.6624
		-52.1421	50.0034								-38.9326	29.0769
		-49.9841	45.2921								-37.8726	32.6049
		-49.3964	46.672								-36.4187	30.806
		-52.1029	44.7631								-36.6581	31.1386
		-53.2099	45.5609								-36.0601	34.1669
		-52.8706	46.01								-36.5004	32.3143
		-54.6018	45.1823								-35.8743	31.1023
		-54.6934	43.9712								-36.2521	29.2567
		-56.5317	44.4199								-35.6544	29.2211
		-58.2409	46.1949								-38.2408	29.1485
		-62.5376	47.3468								-39.8289	28.808
		-63.8388	47.1422								-38.4715	31.3629
		-65.3156	48.1503								-39.0807	30.0553
		-65.7799	48.9971								-38.7924	27.855
		-68.6474	50.0269								-38.7291	28.9719
		-73.08	47.5522								-40.6403	29.0197
		-76.1661	47.2829								-41.7481	30.1167
		-79.2521	47.6859								-40.3862	31.8293
		-82.4853	48.5484								-42.2261	33.0854
		-83.4747	47.0953								-42.3825	32.855
		-85.0512	47.0827								-42.6514	31.5271
		-86.1229	47.7307								-43.7414	33.128
		-88.4335	47.5021								-42.1555	33.5951
		-87.8678	48.1592								-44.3472	35.2293
		-91.24	48.4768								-41.4753	36.5518
		-91.2756	47.1076								-43.2444	35.1443
		-91.4521	45.6792								-41.3085	35.3454
		-91.4765	46.052								-43.241	38.3524
		-91.0203	47.2029								-41.7838	36.0016
		-91.3654	50.9544								-42.3408	35.6131
		-89.85	49.844								-42.4513	34.5634
		-89.4635	49.7439								-44.4158	31.1919
		-90.2489	49.1394								-45.93	32.899
		-90.0938	53.318								-45.1804	27.5358
		-88.4016	51.8458								-48.5254	26.2188
		-88.9204	53.7654								-48.119	24.4236
		-86.4175	54.689								-48.6288	22.5263
		-88.3419	54.4864								-49.7418	21.9903
		-86.9104	54.2156								-49.2421	20.6665
		-86.9383	58.7665								-49.4881	21.3126
		-87.4356	61.2821								-50.9887	21.1599
		-88.1728	59.4595								-50.9035	18.7924
		-88.9156	60.9763								-51.2338	19.4947
		-85.5333	59.2975								-51.8495	19.3544
		-88.1404	58.9789								-51.2315	17.4372
		-86.7171	60.1711								-50.79	18.6467
		-85.0777	61.5995								-51.3326	17.0676
		-87.3677	63.6448								-52.9161	17.9742
		-87.1048	60.8101								-52.4438	15.7721
		-86.3542	62.2806								-50.3953	14.944
		-89.1374	63.7842								-52.5663	14.5895
		-89.3738	62.6272								-51.4124	9.92873
		-90.0456	62.44								-53.1217	11.536
		-89.7352	64.2372								-50.6336	12.3318
		-93.1571	61.922								-51.5912	11.6694
		-92.9265	62.5362								-50.9976	9.14195
		-92.8247	58.9454								-53.7871	9.44272
		-94.6787	59.0578								-53.2075	9.04247
		-94.7407	57.8574								-55.5244	8.49712
		-93.3984	60.8852								-54.8767	10.7714
		-95.5829	55.2963								-56.8465	10.2529
		-94.1301	59.0112								-56.7253	7.59008
		-96.1289	58.2471								-57.7594	8.84037
		-96.0312	59.6922								-59.1223	5.05592
		-95.4342	59.9711								-58.524	4.03319
		-92.6635	63.2526								-60.3253	1.23434
		-95.1569	65.2378								-61.3338	2.19416
		-91.588	66.3887								-62.6894	2.3246
		-91.0689	66.8222								-64.8536	0.401298
		-87.5808	68.0734								-66.563	-1.45243
		-87.674									-66.8491	-1.36584
		-87.6806									-68.2792	-2.12862
		-88.762									-68.2324	-2.92802
		-90.5602									-70.8833	-3.65531
		-90.2301									-71.4389	-2.25291
		-89.6787									-69.2565	-2.87947
		-90.5266									-71.0762	-3.55476
		-89.8079									-71.9152	-2.85859
		-92.468									-72.1171	-1.04952
		-92.243									-72.4432	-2.15015
		-92.9266									-71.4523	-1.90259
		-96.333									-71.1305	0.203495
		-96.6762									-71.3557	-1.56875
		-97.3475									-70.5206	-1.47654
		-96.5846									-70.1857	-0.774547
		-96.1576									-71.218	-2.52269
		-96.0452									-71.0261	-3.40194
		-95.6786									-70.2327	-1.81533
		-91.145									-70.5359	-2.35956
		-91.6229									-68.6838	-2.50845
		-84.5624									-67.1498	-3.22016
		-78.7521									-65.1268	-3.68063
		-18.0735									-64.9176	0.071551
		-21.8281									-62.7092	-2.00068
		-21.3301									-61.978	-2.18728
		-22.0433									-57.8635	-2.78836
		-22.4817									-55.2672	-0.470898
		-21.9898									-54.6506	1.59792
		-20.9204									-50.26	8.10926
		-19.8317									-49.2683	76.9257
		-18.178									-46.0194	70.6095
		-15.4109									-44.1875	72.324
		-13.965									-38.7984	71.5986
		-10.5685									-35.3929	70.297
		-9.48822									-32.0548	66.8968
		-6.83081									-30.6084	67.12
		-1.88402									-29.4997	62.5222
		-0.437421									-26.8543	61.4904
		2.83643									-24.0906	60.4039
		5.89347									-24.2568	56.9172
		10.8215									-23.9563	54.5659
		15.2497									-23.0323	55.7294
		17.9598									-23.7816	53.6225
		20.7704									-21.939	52.0456
		24.4301									-21.0515	53.2716
		26.3853									-22.2882	52.571
		31.8915									-20.8146	54.0815
		35.1794									-21.0489	53.1346
		38.8218									-18.5477	52.277
		41.4725									-18.1196	53.564
		43.4449									-16.0897	54.5129
		45.9636									-17.1979	54.1589
		46.8663									-17.6273	54.6216
		48.5429									-14.9402	53.6579
		49.5473									-17.4148	54.645
		49.9826									-16.8697	53.9607
		50.7391									-16.9586	54.062
		48.0012									-17.9907	54.8784
		48.9886									-18.8466	55.6681
		47.7759									-20.1288	54.3239
		45.8756									-19.0857	54.4084
		45.6597									-19.413	53.6946
		44.4652									-19.2394	56.4775
		41.1281									-16.8864	56.2903
		43.7358									-18.9342	54.9926
		44.8643									-18.2559	56.8174
		44.4157									-17.0418	56.9326
		45.9186									-20.2461	55.3147
		46.5262									-18.3048	56.8525
		46.3159									-19.9267	55.3552
		46.1487									-21.5364	56.2143
		47.8254									-21.2734	53.7961
		46.4185									-21.5037	55.5471
		46.3936									-18.7639	54.5186
		44.8019									-19.4123	54.9055
		45.8098									-16.5662	50.7948
		43.7957									-15.1923	51.7975
		43.0197									-13.6588	50.6724
		43.4065									-12.0728	48.2472
		45.1021									-10.846	48.7554
		44.9268									-8.3187	49.8913
		42.9247									-10.8345	51.6161
		44.4137									65.71	52.5715
		42.0164									61.6058	54.5195
		39.6734									56.6449	53.5317
		36.6952									53.586	55.0207
		33.1536									47.0905	52.125
		29.3119									41.1778	51.4161
		23.9504									38.5162	51.1616
		21.185									31.9553	48.27
		19.6051									28.1711	46.8254
		16.9264									22.0807	44.8215
		14.3289									18.1164	44.9507
		12.5352									10.926	40.3899
		8.92965									9.05228	40.8401
		8.07688									4.12385	37.6461
		6.16571									2.34234	37.1541
		5.70953									-2.87649	33.9068
		5.1604									-4.82432	33.4216
		4.7807									-7.38231	30.77
		2.91909									-9.4683	30.3667
		0.628104									-10.191	28.8183
		-1.41713									-11.1068	29.8169
		-1.83014									-10.5242	30.8046
		-5.19405									-10.7302	31.3862
		-5.46491									-12.4225	27.7692
		-9.57319									-10.9425	29.1834
		-11.7741									-12.1564	29.8017
		-11.5236									-12.5716	26.8009
		-11.3347									-10.3785	26.0466
		-13.8291									-9.9274	24.5951
		-13.1687									-10.2682	24.9803
		-14.2861									-6.7425	28.1482
		-12.0764									-8.29314	24.2939
		-13.8795									-7.38257	23.1949
		-13.8038									-6.45053	23.1337
		-13.4975									-6.75713	23.2088
		-10.5996									-7.85755	20.8863
		-10.1767									-4.44666	17.1108
		-8.34621									-5.78647	13.9636
		-7.21767									-6.85494	15.0274
		-3.99386									-6.01549	12.7319
		-4.78755									-7.86611	7.74693
		-72.6198									-6.64214	2.51435
		-69.6467									-6.70324	5.62047
		-67.3694									-6.48528	4.12273
		-62.8539									-7.78523	1.32001
		-59.4299									-7.90104	-2.29759
		-59.3278									-6.72892	-1.93882
		-55.1399									-6.95273	-4.10921
		-52.136									-8.03625	-4.77486
		-48.201									-6.66509	-5.4978
		-47.393									-7.2978	-3.51438
		-44.5987									-6.14765	-6.14491
		-42.3168									-5.74973	-4.96045
		-39.2296									-8.05199	-4.14356
		-36.9649									-7.45137	-5.09024
		-35.5007									-6.87467	-6.70636
		-34.5362									-7.99492	-8.2644
		-30.978									-7.71808	-10.0992
		-30.9327									-6.04616	-13.265
		-30.9968									-7.57477	-12.3433
		-30.0459									-8.25346	-13.6055
		-31.1108									-9.67476	-13.1096
		-30.4545									-7.58513	-12.0681
		-31.722									-9.27096	-17.2887
		-33.7315									-10.7517	-14.2661
		-33.2117									-10.0959	-13.1783
		-36.2367									-9.57976	-13.8564
		-36.9665									-11.155	-10.2066
		-36.3833									-10.413	-10.8094
		-36.2648									-10.2372	-6.58115
		-35.7081									-9.81299	-7.34392
		-35.563									-7.986	-3.43307
		-33.7207									-9.49107	0.25151
		-32.9956									-9.56837	-0.783615
		-33.0343									-8.98869	-0.831358
		-31.092									-8.04074	2.7562
		-31.3194									-7.21901	2.63427
		-32.2559									-7.95372	2.23913
		-32.3914									-7.82343	-0.137561
		-33.9672									-8.49052	-0.972841
		-36.9151									-6.22943	-0.64899
		-36.9814									-7.79278	-0.738101
		-40.4382									-7.42375	-4.84917
		-41.9959									-6.65932	-4.41544
		-43.6024									-7.96213	-5.16407
		-46.5313									-7.83381	-3.26946
		-48.0734									-7.25458	0.32523
		-50.5663									-6.73586	-4.80494
		-52.0856									-8.02016	-5.30495
		-52.5928									-5.75033	-8.78194
		-54.3697									-6.52215	-11.0865
		-55.0089									-6.61693	-10.3023
		-57.2123									-6.57959	-10.2305
		-58.2704									-4.73016	-8.75881
		-60.1126									-4.6826	-9.60445
		-63.1799									-4.09657	-10.5146
		-63.1181									-5.19891	-11.6442
		-65.934									-5.59819	-11.3947
		-66.518									-4.0719	-8.66603
		-66.5344									-2.62497	-9.38277
		-68.6704									-5.11542	5.44147
		-69.3209									-5.22141	1.17506
[truncated: 5,539 more rows]

## Sheet: 2H
NB: when plotted Y axis 0 is located in top top left corner in Fig 2H
Contour
Left Eye 95%		Individual coutour segments located between points where X=13. Number of vertices for each contour given as Y value below each X=13 value.
X	13	1024	1023	1023	1022	1022	1022	1021.5	1022	1022	1023	1024	13	929	929	930	930	931	932	932	933	934	935	936	936	937	937	938	938	939	940	940	940	940	940	940.5	941	942	943	944	944	945	946	946	947	947	948	949	950
Y	11	510	511	512	511	511	510	509	508	508	507	508	3869	492	492	492	492	492.5	492	492	492	492	492	492	492	493	493	494	494	495	495	495	496	497	498	499	499.333	499.5	500	499	499	498.5	498	498	497	496	497	497	497
Right Eye 95%		Individual coutour segments located between points where X=15. Number of vertices for each contour given as Y value below each X=15 value.
X	15	1	1.53571	1.57692	1.57692	1.51724	1.48387	1.5	1.48387	1.48387	1.51724	1.55556	1.68182	1.83333	1.78947	1.88235	1.9375	2	2.33333	2.5	3	4	4	5	6	7	8	9	9	10	11	11	12	12.5	13	14	15	15.5	16	16	17	18	19	19	18.6667	19	20	21	22
Y	2664	489.556	489	488	487	486	485	484	483	482	481	480	479	478	477	476	475	474.5	475	476	477	476	476	475.5	476	475	475.75	476	476	476.333	477	477	477.5	477	476.5	476	476.333	476	475	475	475	475	474	473	472	471	471.5	471.5	471.75
Left Eye 75%		Individual coutour segments located between points where X=57. Number of vertices for each contour given as Y value below each X=57 value.
X	57	877	877	878	878.333	878.75	878.667	878.25	879	879	880	880.4	880	879.6	879	878	877.667	878	878.2	879	879	880	880	881	881	881.5	882	882	883	883.5	883.5	884	885	886	886	886	885	884	883	882.667	883	883.5	884	884.5	885	885.333	885.5	886	887
Y	2109	554	554	553.667	554	555	556	557	558	558	558.333	559	559.5	560	560.429	560.667	561	561.5	562	563	563	564	564	565	565	566	567	567	567.5	568	569	570	569	570	570	570	570	571	570	571	571.5	572	572.167	572	571.5	572	573	574	574
Right Eye 75%		Individual coutour segments located between points where X=78. Number of vertices for each contour given as Y value below each X=78 value.
X	78	92	92	92	78	86	86	87	88	89	90	91	92	93	93	93	93	92	91	92	93	94	94.5	95	96	96	97	98	98.5	99	100	101	102	103	104	105	105.75	106	107	107	108	109	110	110	110	109	108.333	109	110
Y	3	529	529	529	1757	530	530	530	530	529.5	529.5	529.25	529	530	530	531	531	531	532	533	532.5	532.5	533	533.143	534	534	534.667	535	534	533.833	534	533.667	534	533.667	533.667	533.571	534	534.333	535	535	535.5	536	536	536	536	536	537	537.4	537.667
Left Eye 50%		Individual coutour segments located between points where X=142. Number of vertices for each contour given as Y value below each X=142 value.
X	142	852.8	853	853.25	854	854.75	855	855.333	856	856.5	857	858	859	859.5	860	861	862	862	863	863	863	863	863.2	863.6	864	864.125	864	863.75	863	862	861.857	862	863	863	863	862.5	862	861.25	862	862.143	862	861.556	862	863	863	864	864	864	863.333
Y	1241	619	618.875	619	619.6	619	618.75	619	619.333	619	618.6	618.5	618.571	619	619.6	620	620	620	621	621	622	623	624	625	625.667	626	626.5	627	627.6	627.889	628	629	629	629	629	630	630.25	631	631.75	632	632.2	633	633.4	633	633	633	633	633	634
Right Eye 50%		Individual coutour segments located between points where X=161. Number of vertices for each contour given as Y value below each X=161 value.
X	161	194.429	195	195.667	196	196.75	197	197.5	197	196	195	194.667	194	193.4	194	194.429	161	198	198	199	199.143	199	198	198	161	219	219	219	161	220.167	221	222	223	224	225	226	226.667	227	228	228.5	229	229	230	230.5	230	229.667	230	230.667	231
Y	15	589	588.765	589	589.4	590	590.5	591	591.143	591.375	591.667	591	590.6	590	589.333	589	7	590	590	589.875	590	590.2	590	590	3	590	590	590	1113	590	589.444	589.75	589.286	589.5	589.333	589.556	590	590.333	590.6	591	592	592	592.75	593	593.333	594	594.25	594	593.5
Left Eye 75%		Individual coutour segments located between points where X=214. Number of vertices for each contour given as Y value below each X=214 value.
X	214	830	830	830	214	831.6	832	832.667	832	831.6	214	830	830	830	214	831	831	831	214	828.429	829	830	831	831	830.833	831	832	832.4	832	832.75	833	834	835	836	836.429	837	838	839	839.5	840	841	842	842	842.5	843	844	844.857	845	845.75
Y	3	642	642	642	5	642	641.333	642	642.25	642	3	642	642	642	3	643	643	643	1405	644	643.429	643.375	643	643	644	645	644.333	645	646	647	647.333	647.571	647.333	647.231	647	646.429	646.5	646.182	646	645.5	645.6	645	645	644	643.667	643.538	644	644.143	645
Right Eye 75%		Individual coutour segments located between points where X=236. Number of vertices for each contour given as Y value below each X=236 value.
X	236	269.25	270	270.75	271	272	273	274	275	275.333	275.875	276	277	277.778	278	279	280	281	282	283	283.667	284	285	285.333	285.625	286	287	287.5	287.667	288	288	288.333	288.6	289	290	290	290	290	289	288.5	288	287.333	287	286	286	285	284.6	284.667	285
Y	153	612	611.85	612	612.091	612.471	612.4	612.583	612.667	613	614	614.111	614.364	615	615.143	615.125	615	615.333	615.2	615.571	616	616.375	616.667	617	618	618.25	618.5	619	620	621	621	622	623	623.333	624	624	625	625	625.556	626	626.333	626	625.6	626	626	626.6	627	628	628.6
[truncated: 5,000 more columns]
