# Supplementary material for: Visual pursuit behavior in mice maintains the pursued prey on the retinal region with least optic flow
Source: eLife. 2021 Oct 26;10:e70838. doi: 10.7554/eLife.70838 (PMC8547958; doi:10.7554/eLife.70838)
Supplement: Figure 3—source data 3. [file elife-70838-fig3-data3.xlsx]

## Sheet: 3C
RGC radial dist (o)	mean	SD	Left eye radial dist (o)	mean	SD	Right eye radial dist (o)	mean	SD	Hist centers	P RGC	P left eye	P right eye
9.99884	3.07241	4.45085	53.9313	64.2603	7.50156	81.9861	63.3155	9.9478	2.5	0.694303	0	0
10.041			53.8987			82.0477			7.5	0.187699	0	0
10.0612			54.0381			81.76			12.5	0.117999	0	0
10.1106			54.3175			81.8214			17.5	0	0	0
10.1397			54.4576			81.8831			22.5	0	0	0
10.1719			54.5978			81.9452			27.5	0	0	0
10.2069			54.0061			82.0076			32.5	0	0	0
10.2449			54.1452			82.0703			37.5	0	0	0
10.3757			54.4241			80.9985			42.5	0	0	0.0289849
10.4769			54.5639			81.0567			47.5	0	0.0180251	0.0864421
10.5315			54.7038			81.174			52.5	0	0.105095	0.126272
10.5887			54.844			81.2332			57.5	0	0.187564	0.132187
10.7758			54.9844			81.3525			62.5	0	0.229211	0.15715
10.8431			53.8367			81.5953			67.5	0	0.210362	0.172805
10.9129			53.9751			81.6568			72.5	0	0.162261	0.156952
10.985			54.1138			81.7186			77.5	0	0.085628	0.119607
11.0594			54.2527			81.7808			82.5	0	0.00185401	0.0195993
11.1362			54.3917			81.8433			87.5	0	0	0
11.2151			54.531			81.9061
11.4649			54.6705			80.8909
11.8264			54.8102			80.9495
0			54.9501			81.0085
0			55.0902			81.0678
9.80999			55.2306			81.1274
9.8086			55.3711			81.1873
9.81036			55.5118			81.2476
9.81527			53.9454			81.3083
9.82332			54.0835			81.3693
9.83451			54.2219			81.4306
9.84882			54.3605			81.4922
9.86625			54.4993			81.5542
9.88676			54.6383			81.6165
9.91036			54.7775			81.6791
9.93701			54.9169			81.7421
9.96669			55.0566			80.551
9.99937			55.1964			80.6087
10.035			55.3365			80.6667
10.0736			55.4767			80.7251
10.1151			55.6172			80.7839
10.1595			55.7579			80.8429
10.2067			53.9167			80.9024
10.2567			54.0544			80.9621
10.3095			54.1923			81.0222
10.365			54.3303			81.0826
10.4231			54.4687			81.1434
10.4839			54.6072			81.2045
10.5472			54.7459			81.2659
10.6131			54.8849			81.3277
10.6815			55.024			81.3898
10.7523			55.1634			81.4522
10.8255			55.303			81.5149
10.901			55.4428			81.578
10.9789			55.5827			80.3274
11.0589			55.7229			80.3849
11.1412			56.0039			80.4427
11.2257			56.4269			80.5009
11.3122			53.7523			80.5594
11.4008			54.0264			80.6183
11.4914			54.1637			80.6775
11.5839			54.3013			80.737
11.6784			54.4391			80.7969
11.7747			54.5772			80.8571
11.8729			54.7154			80.9176
0			54.8539			80.9785
0			54.9926			81.0397
0			55.1315			81.1013
0			55.2706			81.1632
9.63423			55.4099			81.2254
9.63282			55.5494			81.2879
9.63461			55.6891			81.3508
9.63961			55.829			81.414
9.64781			55.9691			81.4776
9.6592			56.1095			81.7351
9.67377			56.25			81.8003
9.69151			56.3907			80.104
9.7124			56.5316			80.1613
9.73642			53.9995			80.2189
9.76354			54.1363			80.2768
9.79374			54.2734			80.3351
9.827			54.4108			80.3937
9.86328			54.5483			80.4527
9.90254			54.6861			80.512
9.94476			54.824			80.5717
9.98989			54.9622			80.6317
10.0379			55.1006			80.692
10.0887			55.2392			80.7527
10.1424			55.3781			80.8137
10.1988			55.5171			80.875
10.2579			55.6564			80.9367
10.3196			55.7958			80.9987
10.3839			55.9355			81.0611
10.4509			56.0753			81.1238
10.5203			56.2154			81.1868
10.5922			56.3556			81.2501
10.6665			56.4961			81.3138
10.7431			56.6368			81.3778
10.8221			54.1101			81.4421
10.9033			54.2467			81.5068
10.9868			54.3835			81.5718
11.0724			54.5205			81.6371
11.1601			54.6578			81.7027
11.2499			54.7953			81.7687
11.3417			54.933			79.2235
11.4355			55.0709			79.2764
11.5311			55.209			79.3296
11.6287			55.3474			79.5458
11.7281			55.4859			79.7677
11.8292			55.6247			79.8807
11.9321			55.7637			79.9378
12.0367			55.9029			79.9951
12.1429			56.0422			80.0529
0			56.1818			80.1109
0			56.3216			80.1694
0			56.4616			80.2281
0			56.6018			80.2872
0			53.9491			80.3466
0			54.085			80.4064
9.45848			54.221			80.4665
9.45704			54.3573			80.527
9.45886			54.4939			80.5878
9.46395			54.6307			80.6489
9.4723			54.7676			80.7104
9.48391			54.9048			80.7722
9.49875			55.0423			80.8343
9.51681			55.1799			80.8968
9.53808			55.3178			80.9596
9.56254			55.4559			81.0228
9.59016			55.5941			81.0862
9.6209			55.7326			81.15
9.65476			55.8713			81.2142
9.69168			56.0103			81.2786
9.73164			56.1494			81.3434
9.77459			56.2887			81.4085
9.82051			56.4282			81.474
9.86934			56.568			81.5398
9.92105			56.7079			81.6059
9.97558			56.848			81.6723
10.0329			57.1289			78.8992
10.093			57.2696			78.951
10.1557			57.4105			79.0033
10.2211			59.2594			79.0558
10.2891			54.061			79.1088
10.3596			54.1965			79.1621
10.4326			54.3323			79.2157
10.508			54.4684			79.2697
10.5858			54.6046			79.3241
10.6659			54.7411			79.3788
10.7484			54.8778			79.4339
10.833			55.0148			79.4893
10.9198			55.1519			79.545
11.0087			55.2893			79.6012
11.0998			55.4269			79.6576
11.1928			55.5647			79.7144
11.2878			55.7027			79.7716
11.3847			55.8409			79.8291
11.4835			55.9794			79.8869
11.5841			56.118			79.9451
11.6865			56.2569			80.0036
11.7907			56.3959			80.0625
11.8965			56.5352			80.1217
12.0039			56.6747			80.1813
12.2236			56.8143			80.2412
12.3357			56.9542			80.3014
12.4493			57.0943			80.362
0			57.2345			80.4229
0			57.375			80.4842
0			57.5157			80.5458
0			59.2182			80.6077
0			59.3613			80.67
0			59.5045			80.7326
0			54.1731			80.7955
0			54.3084			80.8588
9.28272			54.444			80.9224
9.28126			54.5797			80.9863
9.28312			54.7157			81.0506
9.2883			54.8519			81.1152
9.29681			54.9884			81.1801
9.30863			55.125			81.2454
9.32375			55.2619			81.3109
9.34216			55.399			81.3768
9.36382			55.5363			81.4431
9.38873			55.6738			81.5096
9.41686			55.8116			81.6437
9.44817			55.9495			78.6795
9.48264			56.0877			78.7312
9.52023			56.2261			78.7831
9.56091			56.3647			78.8355
9.60462			56.5035			78.8882
9.65135			56.6425			78.9412
9.70103			56.7817			78.9947
9.75363			56.9211			79.0484
9.8091			57.0607			79.1025
9.86739			57.2005			79.157
9.92845			57.3405			79.2118
9.99222			57.4807			79.267
10.0587			57.6211			79.3225
10.1277			57.7617			79.3784
10.1994			59.0356			79.4347
10.2735			59.3206			79.4912
10.3501			59.4634			79.5482
10.4291			59.6064			79.6054
10.5104			54.1509			79.663
10.594			54.2857			79.721
10.6799			54.4207			79.7793
10.7679			54.5559			79.838
10.8581			54.6914			79.897
10.9504			54.8271			79.9563
11.0447			54.9631			80.016
11.1409			55.0992			80.076
11.2391			55.2356			80.1364
11.3392			55.3722			80.1971
11.4411			55.509			80.2581
11.5447			55.6461			80.3195
11.6501			55.7833			80.3813
11.7572			55.9208			80.4433
11.8659			56.0585			80.5057
11.9762			56.1964			80.5684
12.0881			56.3345			80.6315
12.2015			56.4729			80.6949
12.3163			56.6114			80.7586
0			56.7501			80.8227
0			56.8891			80.8871
0			57.0282			80.9518
0			57.1676			81.0169
0			57.3071			81.0822
0			57.4469			81.1479
0			57.5868			81.214
0			57.7269			81.2803
0			57.8673			81.347
0			58.0078			81.414
0			59.1388			81.4814
9.10697			59.281			78.4601
9.10547			59.4234			78.5115
9.10737			59.566			78.5632
9.11266			59.7087			78.6153
9.12133			59.8516			78.6678
9.13338			54.264			78.7206
9.14879			54.3985			78.7737
9.16754			54.5333			78.8273
9.18962			54.6683			78.8811
9.215			54.8035			78.9354
9.24366			54.9389			78.99
9.27556			55.0745			79.0449
9.31066			55.2104			79.1002
9.34894			55.3465			79.1558
9.39036			55.4829			79.2118
9.43487			55.6194			79.2682
9.48243			55.7562			79.3249
9.53299			55.8932			79.3819
9.58652			56.0304			79.4393
9.64295			56.1678			79.4971
9.70223			56.3055			79.5551
9.76432			56.4433			79.6136
9.82917			56.5814			79.6724
9.89671			56.7196			79.7315
9.96689			56.8581			79.7909
10.0397			56.9968			79.8507
10.115			57.1357			79.9109
10.1927			57.2748			79.9714
10.2729			57.414			80.0322
10.3555			57.5535			80.0934
10.4404			57.6932			80.1549
10.5275			57.8331			80.2167
10.6168			57.9732			80.2789
10.7083			58.1135			80.3415
10.8018			58.2539			80.4043
10.8974			58.3946			80.4675
10.9949			58.9591			80.531
11.0944			59.1007			80.5949
11.1958			59.2425			80.6591
11.2989			59.3844			80.7236
11.4039			59.5265			80.7885
11.5106			59.6689			80.8536
11.619			59.8114			80.9192
11.7289			59.954			80.985
11.8405			60.0969			81.0512
11.9537			60.2399			81.1177
12.0683			60.3831			81.1845
12.1844			60.5265			81.2516
0			61.8243			81.3191
0			62.1145			78.292
0			62.2598			78.3434
0			62.4053			78.3953
0			62.551			78.4475
0			63.1351			78.5001
0			63.4281			78.553
0			49.1009			78.6063
0			54.5117			78.6599
0			54.6462			78.7139
0			54.7809			78.7682
0			54.9158			78.8229
0			55.051			78.878
0			55.1864			78.9334
0			55.322			78.9892
8.93122			55.4578			79.0453
8.92969			55.5939			79.1018
8.93163			55.7301			79.1586
8.93702			55.8666			79.2157
8.94586			56.0034			79.2733
8.95814			56.1403			79.3311
8.97386			56.2775			79.3893
8.99298			56.4148			79.4479
9.01548			56.5524			79.5068
9.04135			56.6902			79.566
9.07055			56.8282			79.6256
9.10306			56.9664			79.6855
9.13883			57.1048			79.7458
9.17783			57.2435			79.8064
9.22001			57.3823			79.8674
9.26534			57.5213			79.9287
9.31377			57.6605			79.9903
9.36524			57.8			80.0523
9.41972			57.9396			80.1146
9.47714			58.0794			80.1773
9.53746			58.2194			80.2402
9.60061			58.3596			80.3036
9.66655			58.5			80.3672
9.73522			58.6406			80.4312
9.80656			58.7814			80.4955
9.88051			58.9224			80.5602
9.95702			59.0635			80.6252
10.036			59.2049			80.6905
10.1175			59.3464			80.7561
10.2013			59.4881			80.8221
10.2874			59.63			80.8884
10.3758			59.7721			80.955
10.4664			59.9143			81.022
10.5592			60.0568			81.0893
10.654			60.1994			81.1569
10.7509			60.3421			81.2248
10.8498			60.4851			77.3026
10.9506			60.6282			78.1238
11.0533			60.7715			78.1754
11.1578			60.915			78.2274
11.264			61.0586			78.2797
11.372			61.2024			78.3324
11.4817			61.4905			78.3854
11.593			61.6348			78.4388
11.7059			61.7793			78.4926
11.8203			61.9239			78.5467
11.9362			62.0687			78.6012
12.0536			62.2137			78.656
12.1724			62.3588			78.7111
12.2925			62.504			78.7667
12.414			62.6494			78.8226
12.6607			62.795			78.8788
13.2982			63.2326			78.9354
0			63.3788			78.9923
0			63.5252			79.0496
0			54.3576			79.1072
0			54.4913			79.1652
0			54.6253			79.2235
0			54.7595			79.2822
0			54.8939			79.3412
0			55.0285			79.4006
0			55.1634			79.4603
0			55.2985			79.5204
0			55.4338			79.5808
0			55.5694			79.6415
0			55.7052			79.7026
0			55.8412			79.764
0			55.9774			79.8258
0			56.1139			79.8879
8.75547			56.2505			79.9503
8.75391			56.3874			80.0131
8.75588			56.5245			80.0762
8.76138			56.6619			80.1397
8.7704			56.7994			80.2035
8.78293			56.9371			80.2676
8.79896			57.0751			80.332
8.81846			57.2132			80.3968
8.84141			57.3516			80.4619
8.86778			57.4901			80.5274
8.89756			57.6289			80.5932
8.93069			57.7679			80.6593
8.96715			57.9071			80.7257
9.00689			58.0464			80.7925
9.04987			58.186			80.8596
9.09605			58.3257			80.927
9.14537			58.4657			80.9947
9.19779			58.6058			81.0628
9.25325			58.7462			77.0876
9.3117			58.8867			77.1327
9.37308			59.0274			77.1782
9.43734			59.1683			77.224
9.50441			59.3094			77.8534
9.57424			59.4507			77.9044
9.64677			59.5922			77.9558
9.72194			59.7338			78.0075
9.79968			59.8756			78.0595
9.87994			60.0176			78.112
9.96266			60.1598			78.1648
10.0478			60.3022			78.2179
10.1352			60.4447			78.2714
10.2249			60.5874			78.3253
10.3169			60.7303			78.3795
10.411			60.8734			78.4341
10.5071			61.0166			78.489
10.6054			61.16			78.5443
10.7056			61.3036			78.6
10.8077			61.4473			78.656
10.9117			61.5912			78.7123
11.0176			61.7353			78.769
11.1252			61.8795			78.8261
11.2345			62.0239			78.8835
11.3455			62.1684			78.9412
11.4582			62.3132			78.9993
11.5724			62.458			79.0578
11.6881			62.6031			79.1166
11.8053			62.7482			79.1757
11.924			62.8936			79.2352
12.044			63.1847			79.2951
12.1654			63.3305			79.3553
12.2881			63.6226			79.4158
12.4121			63.7689			79.4766
12.5373			63.9153			79.5379
12.6638			49.2313			79.5994
12.7914			49.3532			79.6613
13.0499			54.4721			79.7235
13.1808			54.6055			79.7861
13.3127			54.7391			79.849
0			54.873			79.9123
0			55.0072			79.9758
0			55.1415			80.0397
0			55.2761			80.104
0			55.411			80.1686
0			55.546			80.2335
0			55.6813			80.2988
0			55.8168			80.3643
0			55.9526			80.4302
0			56.0885			80.4965
0			56.2247			80.5631
0			56.3611			80.63
0			56.4977			80.6972
0			56.6346			80.7647
0			56.7716			80.8326
0			56.9089			80.9008
0			57.0464			80.9694
0			57.184			81.0382
0			57.3219			81.1074
8.57972			57.46			76.7844
8.57813			57.5983			76.9177
8.58014			57.7368			76.9629
8.58576			57.8756			77.0084
8.59496			58.0145			77.0544
8.60774			58.1536			77.1007
8.62409			58.2929			77.7363
8.64399			58.4324			77.7877
8.6674			58.5721			77.8395
8.69431			58.712			77.8917
8.72467			58.8521			77.9443
8.75846			58.9924			77.9972
8.79563			59.1328			78.0504
8.83614			59.2735			78.1041
8.87995			59.4143			78.158
8.92701			59.5554			78.2124
8.97726			59.6966			78.2671
9.03065			59.838			78.3221
9.08713			59.9795			78.3775
9.14664			60.1213			78.4333
9.20912			60.2632			78.4894
9.27452			60.4054			78.5459
9.34276			60.5476			78.6027
9.41379			60.6901			78.6599
9.48755			60.8328			78.7174
9.56397			60.9756			78.7753
9.64298			61.1186			78.8335
9.72454			61.2617			78.8921
9.80856			61.405			78.951
9.895			61.5485			79.0103
9.98378			61.6922			79.0699
10.0748			61.836			79.1299
10.1681			61.98			79.1902
10.2636			62.1242			79.2508
10.3611			62.2685			79.3118
10.4607			62.413			79.3732
10.5623			62.5576			79.4348
10.6659			62.7024			79.4969
10.7712			62.8474			79.5592
10.8785			62.9925			79.6219
10.9874			63.1378			79.685
11.0981			63.2832			79.7483
11.2105			63.4288			79.812
11.3244			63.5745			79.8761
11.44			63.7204			79.9405
11.557			63.8664			80.0052
11.6756			64.0126			80.0702
11.7955			49.116			80.1356
11.9168			49.237			80.2013
12.0395			49.3582			80.2674
12.1635			49.4798			80.3338
12.2888			49.6018			80.4005
12.4152			54.4539			80.4675
12.5429			54.5868			80.5349
12.6717			54.7199			80.6026
12.8017			54.8533			80.6706
12.9327			54.9869			80.7389
13.0647			55.1208			80.8076
13.1978			55.2549			80.8766
13.4669			55.3892			80.9459
0			55.5238			81.0155
0			55.6586			76.6584
0			55.7936			76.7029
0			55.9288			76.7478
0			56.0643			76.7931
0			56.2			76.8387
0			56.3359			76.8848
0			56.472			76.9312
0			56.6084			77.5681
0			56.745			77.6197
0			56.8817			77.6716
0			57.0187			77.7239
0			57.1559			77.7766
0			57.2934			77.8296
0			57.431			77.883
0			57.5688			77.9367
0			57.7069			77.9908
0			57.8451			78.0453
0			57.9836			78.1001
0			58.1222			78.1553
0			58.2611			78.2108
0			58.4001			78.2667
0			58.5394			78.3229
0			58.6788			78.3795
0			58.8185			78.4365
8.40397			58.9583			78.4938
8.40235			59.0983			78.5514
8.4044			59.2385			78.6094
8.41013			59.3789			78.6678
8.41953			59.5195			78.7265
8.43258			59.6603			78.7855
8.44927			59.8013			78.8449
8.46957			59.9424			78.9046
8.49347			60.0838			78.9647
8.52092			60.2253			79.0252
8.5519			60.367			79.0859
8.58637			60.5088			79.1471
8.62428			60.6509			79.2085
8.6656			60.7931			79.2703
8.71026			60.9355			79.3325
8.75823			61.0781			79.395
8.80944			61.2209			79.4578
8.86385			61.3638			79.521
8.92139			61.5069			79.5845
8.98199			61.6501			79.6483
9.04561			61.7935			79.7125
9.11218			61.9371			79.777
9.18163			62.0809			79.8418
9.2539			62.2248			79.907
9.32892			62.3689			79.9725
9.40662			62.5132			80.0384
9.48695			62.6576			80.1046
9.56984			62.8021			80.1711
9.65521			62.9469			80.2379
9.743			63.0918			80.3051
9.83316			63.2368			80.3726
9.92561			63.382			80.4404
10.0203			63.5274			80.5086
10.1171			63.6729			80.5771
10.2161			63.8185			80.6459
10.3171			63.9643			80.715
10.4201			64.1103			80.7844
10.525			49.3645			80.8542
10.6318			49.4855			80.9243
10.7404			49.6068			76.444
10.8507			54.3047			76.4883
10.9628			54.4369			76.5329
11.0765			54.5692			76.5779
11.1919			54.7019			76.6233
11.3088			54.8347			76.669
11.4272			54.9678			76.7152
11.547			55.1012			76.7617
11.6683			55.2348			76.8086
11.7909			55.3686			76.8558
11.9149			55.5026			77.197
12.0402			55.6369			77.2978
12.1667			55.7714			77.4001
12.2944			55.9062			77.4517
12.4233			56.0411			77.5038
12.5534			56.1763			77.5562
12.6845			56.3118			77.609
12.8167			56.4474			77.6621
12.95			56.5833			77.7156
13.0843			56.7194			77.7694
13.2195			56.8557			77.8237
13.3557			56.9922			77.8782
0			57.1289			77.9332
0			57.2659			77.9885
0			57.403			78.0441
0			57.5404			78.1001
0			57.678			78.1565
0			57.8157			78.2132
0			57.9537			78.2702
0			58.0919			78.3277
0			58.2303			78.3854
0			58.3689			78.4436
0			58.5077			78.502
0			58.6467			78.5608
0			58.7859			78.62
0			58.9253			78.6795
0			59.0649			78.7394
0			59.2046			78.7996
0			59.3446			78.8602
0			59.4847			78.9211
0			59.6251			78.9823
0			59.7656			79.0439
0			59.9063			79.1059
0			60.0472			79.1681
0			60.1883			79.2308
0			60.3296			79.2937
0			60.471			79.357
0			60.6127			79.4206
0			60.7545			79.4846
8.22823			60.8965			79.5489
8.22657			61.0386			79.6136
8.22867			61.181			79.6786
8.23452			61.3235			79.7439
8.24412			61.4662			79.8095
8.25744			61.609			79.8755
8.27448			61.752			79.9418
8.29522			61.8952			80.0085
8.31961			62.0386			80.0755
8.34764			62.1821			80.1428
8.37926			62.3258			80.2104
8.41443			62.4696			80.2784
8.45312			62.6137			80.3466
8.49526			62.7578			80.4153
8.54082			62.9022			80.4842
8.58973			63.0467			80.5535
8.64195			63.1913			80.6231
8.6974			63.3362			80.693
8.75603			63.4811			80.7632
8.81778			63.6263			80.8338
8.88257			63.7715			80.9046
8.95035			63.917			76.2299
9.02105			64.0626			76.2739
9.09459			64.2083			76.3182
9.17091			64.3542			76.3629
9.24995			64.7927			76.408
9.33162			49.4923			76.4535
9.41588			49.613			76.4994
9.50263			49.734			76.5456
9.59182			49.8553			76.5922
9.68339			54.2894			76.6392
9.77725			54.421			76.6866
9.87335			54.5528			76.7343
9.97163			54.6849			77.0285
10.072			54.8173			77.0788
10.1744			54.9498			77.1295
10.2789			55.0827			77.1806
10.3852			55.2157			77.2838
10.4934			55.349			77.336
10.6034			55.4826			77.3885
10.7152			55.6164			77.4414
10.8287			55.7504			77.4946
10.9438			55.8846			77.5482
11.0605			56.0191			77.6022
11.1788			56.1538			77.6565
11.2985			56.2887			77.7112
11.4197			56.4239			77.7663
11.5424			56.5592			77.8217
11.6663			56.6948			77.8774
11.7916			56.8307			77.9336
11.9182			56.9667			77.99
12.046			57.1029			78.0469
12.175			57.2394			78.1041
12.3051			57.3761			78.1616
12.4364			57.513			78.2195
12.5688			57.6501			78.2777
12.7022			57.7874			78.3363
12.8366			57.9249			78.3953
12.9721			58.0627			78.4546
13.1085			58.2006			78.5142
13.2458			58.3387			78.5742
0			58.4771			78.6346
0			58.6156			78.6952
0			58.7543			78.7563
0			58.8933			78.8177
0			59.0324			78.8794
0			59.1717			78.9414
0			59.3113			79.0038
0			59.451			79.0666
0			59.5909			79.1297
0			59.731			79.1931
0			59.8713			79.2569
0			60.0117			79.321
0			60.1524			79.3854
0			60.2932			79.4502
0			60.4342			79.5153
0			60.5755			79.5808
0			60.7168			79.6466
0			60.8584			79.7127
0			61.0001			79.7791
0			61.1421			79.8459
0			61.2842			79.913
0			61.4264			79.9805
0			61.5689			80.0482
0			61.7115			80.1163
0			61.8543			80.1848
0			61.9972			80.2535
0			62.1404			80.3226
0			62.2836			80.392
0			62.4271			80.4617
8.05248			62.5707			80.5318
8.05079			62.7145			80.6022
8.05293			62.8585			80.6729
8.05891			63.0026			80.7439
8.06872			63.1468			80.8152
8.08233			63.2913			81.1038
8.09974			63.4358			81.1767
8.12092			63.5806			76.1037
8.14584			63.7255			76.1482
8.17446			63.8705			76.193
8.20675			64.0158			76.2382
8.24266			64.1611			76.2838
8.28215			64.3066			76.3298
8.32516			64.4523			76.3761
8.37164			64.5981			76.4228
8.42154			64.8902			76.4699
8.47479			49.6205			76.5174
8.53132			49.9825			76.5652
8.59109			54.4062			76.6134
8.65401			54.5375			76.662
8.72002			54.6691			76.86
8.78906			54.8009			76.9105
8.86104			54.933			76.9613
8.9359			55.0653			77.0125
9.01357			55.1978			77.064
9.09397			55.3306			77.1159
9.17703			55.4637			77.1682
9.26269			55.5969			77.2208
9.35087			55.7304			77.2738
9.44149			55.8642			77.3272
9.5345			55.9981			77.3809
9.62982			56.1323			77.435
9.72738			56.2668			77.4894
9.82711			56.4014			77.5442
9.92896			56.5363			77.5994
10.0329			56.6714			77.6549
10.1387			56.8067			77.7108
10.2465			56.9423			77.7671
10.3562			57.078			77.8237
10.4676			57.214			77.8806
10.5809			57.3502			77.9379
10.6958			57.4867			77.9956
10.8123			57.6233			78.0536
10.9304			57.7601			78.112
11.0501			57.8972			78.1707
11.1712			58.0344			78.2298
11.2938			58.1719			78.2892
11.4177			58.3096			78.349
11.5431			58.4475			78.4091
11.6697			58.5855			78.4695
11.7975			58.7238			78.5304
11.9266			58.8623			78.5915
12.0569			59.001			78.653
12.1883			59.1399			78.7149
12.3208			59.279			78.7771
12.4544			59.4182			78.8396
12.5891			59.5577			78.9025
12.7247			59.6973			78.9657
12.8613			59.8372			79.0293
12.9989			59.9772			79.0932
13.1373			60.1174			79.1574
13.2767			60.2579			79.222
13.4169			60.3984			79.2869
13.6997			60.5392			79.3521
13.8423			60.6802			79.4177
0			60.8213			79.4836
0			60.9627			79.5499
0			61.1042			79.6165
0			61.2458			79.6834
0			61.3877			79.7507
0			61.5297			79.8182
0			61.6719			79.8861
0			61.8143			79.9544
0			61.9568			80.023
0			62.0996			80.0918
0			62.2425			80.1611
0			62.3855			80.2306
0			62.5287			80.3005
0			62.6721			80.3707
0			62.8157			80.4412
0			62.9594			80.512
0			63.1033			80.5832
0			63.2473			80.6547
0			63.3915			80.7265
0			63.5359			80.9438
0			63.6804			81.0169
0			63.8251			81.0902
0			63.9699			75.7593
0			64.1149			75.8457
0			64.26			75.8895
0			64.4053			75.9336
0			64.5507			75.9782
0			64.6963			76.0231
0			64.988			76.0684
0			49.7489			76.1141
0			50.11			76.1602
0			54.3926			76.2066
7.87674			54.6544			76.2534
7.87501			54.7857			76.3006
7.8772			54.9172			76.3482
7.88331			55.049			76.3961
7.89333			55.181			76.4444
7.90725			55.3133			76.4931
7.92505			55.4458			76.5422
7.94669			55.5786			76.5916
7.97215			55.7116			76.6414
8.0014			55.8448			76.7422
8.03438			55.9783			76.7931
8.07106			56.112			76.8444
8.11138			56.2459			76.896
8.15529			56.38			76.948
8.20274			56.5144			77.0004
8.25366			56.649			77.0532
8.30798			56.7839			77.1063
8.36565			56.9189			77.1598
8.42659			57.0542			77.2136
8.49073			57.1897			77.2678
8.558			57.3254			77.3224
8.62833			57.4614			77.3773
8.70164			57.5975			77.4326
8.77786			57.7339			77.4882
8.85691			57.8705			77.5442
8.93873			58.0073			77.6006
9.02322			58.1443			77.6573
9.11032			58.2815			77.7144
9.19996			58.4189			77.7718
9.29206			58.5565			77.8296
9.38655			58.6944			77.8878
9.48335			58.8324			77.9463
9.5824			58.9706			78.0051
9.68363			59.109			78.0643
9.78697			59.2477			78.1238
9.89235			59.3865			78.1837
9.99971			59.5255			78.244
10.109			59.6647			78.3046
10.2201			59.8041			78.3655
10.3331			59.9437			78.4268
10.4477			60.0835			78.4884
10.5641			60.2235			78.5504
10.682			60.3636			78.6127
10.8016			60.504			78.6754
10.9227			60.6445			78.7384
11.0452			60.7852			78.8018
11.1691			60.9261			78.8655
11.2945			61.0672			78.9295
11.4211			61.2085			78.9939
11.5491			61.3499			79.0586
11.6783			61.4915			79.1236
11.8087			61.6333			79.189
11.9402			61.7753			79.2547
12.0729			61.9174			79.3208
12.2067			62.0597			79.3872
12.3415			62.2022			79.4539
12.4774			62.3449			79.521
12.6142			62.4877			79.5883
12.752			62.6307			79.6561
12.8907			62.7738			79.7241
13.0303			62.9172			79.7925
13.1708			63.0607			79.8612
13.3121			63.2043			79.9302
13.4543			63.3481			79.9996
13.5972			63.4921			80.0693
13.7408			63.6362			80.1393
0			63.7805			80.2096
0			63.9249			80.2803
0			64.0696			80.3513
0			64.2143			80.4226
0			64.3592			80.4942
0			64.5043			80.5661
0			64.6495			80.6384
0			64.7949			80.711
0			65.0861			80.7839
0			65.2319			80.8571
0			48.8153			80.9306
0			48.932			81.0045
0			49.049			81.0786
0			49.1663			75.5888
0			49.284			75.6754
0			49.6391			75.7193
0			49.7582			75.7636
0			50.4795			75.8082
0			50.6009			75.8532
0			50.7226			75.8986
0			53.9909			75.9444
0			54.1204			75.9906
0			54.2501			76.0371
0			54.3801			76.084
0			54.5103			76.1313
0			54.6408			76.179
0			54.7716			76.2271
0			54.9026			76.2755
0			55.0339			76.3243
0			55.1654			76.3735
0			55.2971			76.423
0			55.4291			76.4729
0			55.5613			76.5232
0			55.6938			76.5739
0			55.8265			76.6249
0			55.9595			76.6763
7.701			56.0927			76.7281
7.69923			56.2261			76.7802
7.70147			56.3598			76.8327
7.70772			56.4936			76.8856
7.71797			56.6278			76.9388
7.73221			56.7621			76.9924
7.7504			56.8967			77.0463
7.77253			57.0315			77.1007
7.79856			57.1665			77.1554
7.82845			57.3017			77.2104
7.86216			57.4372			77.2658
7.89964			57.5729			77.3216
7.94083			57.7087			77.3777
7.98568			57.8449			77.4342
8.03413			57.9812			77.491
8.08611			58.1177			77.5482
8.14155			58.2544			77.6058
8.20039			58.3914			77.6637
8.26255			58.5286			77.722
8.32795			58.6659			77.7806
8.39653			58.8035			77.8395
8.4682			58.9413			77.8989
8.54289			59.0792			77.9585
8.62051			59.2174			78.0186
8.70099			59.3558			78.0789
8.78426			59.4944			78.1397
8.87022			59.6331			78.2007
8.95881			59.7721			78.2621
9.04995			59.9112			78.3239
9.14356			60.0506			78.386
9.23957			60.1901			78.4485
9.33789			60.3299			78.5113
9.43847			60.4698			78.5744
9.54123			60.6099			78.6379
9.64609			60.7502			78.7017
9.753			60.8906			78.7659
9.86188			61.0313			78.8304
9.97267			61.1721			78.8952
10.0853			61.3131			78.9604
10.1997			61.4543			79.0259
10.3159			61.5957			79.0918
10.4337			61.7373			79.158
10.5531			61.879			79.2245
10.6741			62.0209			79.2914
10.7966			62.163			79.3586
10.9206			62.3052			79.4261
11.0459			62.4476			79.4939
11.1726			62.5902			79.5621
11.3007			62.733			79.6307
11.43			62.8759			79.6995
11.5605			63.019			79.7687
11.6922			63.1622			79.8382
11.8251			63.3057			79.908
11.959			63.4492			79.9782
12.0941			63.593			80.0486
12.2301			63.7369			80.1194
12.3672			63.8809			80.1906
12.5052			64.0252			80.262
12.6442			64.1695			80.3338
12.7841			64.3141			80.4058
12.9249			64.4588			80.4783
13.0665			64.6036			80.551
13.2089			64.7486			80.624
13.3521			64.8938			80.6974
13.4961			65.0391			80.7711
13.6409			65.1845			80.845
0			65.3301			80.9193
0			48.9471			80.994
0			49.0634			81.0689
0			49.1801			81.1441
0			49.2972			81.2197
0			49.4145			81.2955
0			49.7688			81.3717
0			49.8875			75.5052
0			50.0066			75.5491
0			50.126			75.5935
0			50.3659			75.6382
0			50.4863			75.6834
0			50.607			75.7289
0			50.728			75.7748
0			50.8494			75.821
0			53.9812			75.8677
0			54.1101			75.9147
0			54.2393			75.9621
0			54.3687			76.0099
0			54.4984			76.0581
0			54.6284			76.1066
0			54.7586			76.1555
0			54.8891			76.2048
0			55.0198			76.2544
0			55.1508			76.3045
0			55.282			76.3549
0			55.4135			76.4056
0			55.5452			76.4568
0			55.6772			76.5083
0			55.8094			76.5602
0			55.9418			76.6124
0			56.0745			76.665
0			56.2074			76.718
0			56.3406			76.7713
0			56.4739			76.8251
0			56.6076			76.8791
0			56.7414			76.9336
0			56.8755			76.9884
0			57.0098			77.0435
0			57.1443			77.0991
0			57.2791			77.155
7.52526			57.414			77.2112
7.52344			57.5492			77.2678
7.52574			57.6846			77.3248
7.53214			57.8203			77.3821
7.54263			57.9561			77.4398
7.55719			58.0922			77.4978
7.57581			58.2285			77.5562
7.59845			58.3649			77.6149
7.62507			58.5016			77.674
7.65564			58.6385			77.7335
7.69011			58.7756			77.7933
7.72842			58.9129			77.8534
7.77052			59.0505			77.9139
7.81635			59.1882			77.9748
7.86584			59.3261			78.036
7.91892			59.4642			78.0975
7.97553			59.6025			78.1594
8.03558			59.7411			78.2217
8.099			59.8798			78.2843
8.16572			60.0187			78.3472
8.23564			60.1578			78.4105
8.3087			60.2971			78.4741
8.38481			60.4365			78.538
8.46388			60.5762			78.6023
8.54584			60.7161			78.667
8.6306			60.8561			78.7319
8.71808			60.9963			78.7973
8.80821			61.1368			78.8629
8.90089			61.2774			78.9289
8.99605			61.4181			78.9952
9.09361			61.5591			79.0619
9.1935			61.7002			79.1289
9.29564			61.8415			79.1962
9.39996			61.983			79.2639
9.50638			62.1247			79.3319
9.61484			62.2665			79.4002
9.72527			62.4085			79.4689
9.83759			62.5507			79.5379
9.95176			62.6931			79.6072
10.0677			62.8356			79.6768
10.1854			62.9783			79.7468
10.3047			63.1211			79.8171
10.4256			63.2642			79.8877
10.548			63.4073			79.9586
10.672			63.5507			80.0299
10.7973			63.6942			80.1015
10.9241			63.8379			80.1734
11.0522			63.9817			80.2456
11.1816			64.1257			80.3182
11.3123			64.2699			80.3911
11.4442			64.4142			80.4642
11.5772			64.5586			80.5377
11.7114			64.7033			80.6116
11.8466			64.848			80.6857
11.9829			64.993			80.7602
12.1202			65.138			80.8349
12.2585			65.2833			80.91
12.3978			65.4287			80.9854
12.538			65.5742			81.0611
12.679			49.0792			81.1371
12.8209			49.1952			81.2134
12.9637			49.3116			81.29
13.1072			49.4283			75.2912
13.2515			49.5454			75.3349
13.3966			49.7806			75.379
13.5424			49.8987			75.4235
13.6889			50.255			75.4683
0			50.3744			75.5135
0			50.4942			75.5592
0			50.6143			75.6051
0			50.7347			75.6515
0			50.8555			75.6983
0			50.9766			75.7454
0			54.1009			75.7929
0			54.2296			75.8408
0			54.3585			75.8891
0			54.4877			75.9377
0			54.6171			75.9867
0			54.7468			76.0361
0			54.8767			76.0859
0			55.0069			76.136
0			55.1373			76.1865
0			55.268			76.2374
0			55.399			76.2887
0			55.5302			76.3403
0			55.6616			76.3923
0			55.7933			76.4446
0			55.9252			76.4974
0			56.0574			76.5505
0			56.1898			76.6039
0			56.3225			76.6578
0			56.4553			76.712
0			56.5885			76.7665
0			56.7218			76.8214
0			56.8554			76.8767
0			56.9892			76.9324
0			57.1232			76.9884
0			57.2575			77.0447
0			57.392			77.1015
0			57.5267			77.1586
0			57.6616			77.216
0			57.7968			77.2738
0			57.9321			77.332
0			58.0677			77.3905
0			58.2035			77.4493
0			58.3395			77.5086
0			58.4757			77.5681
0			58.6122			77.6281
0			58.7488			77.6884
0			58.8857			77.749
7.34952			59.0227			77.81
7.34766			59.16			77.8713
7.35001			59.2975			77.933
7.35656			59.4351			77.995
7.3673			59.573			78.0574
7.38221			59.7111			78.1201
7.40127			59.8493			78.1831
7.42444			59.9878			78.2466
7.45169			60.1264			78.3103
7.48297			60.2653			78.3744
7.51822			60.4043			78.4388
7.55741			60.5436			78.5036
7.60046			60.683			78.5687
7.6473			60.8226			78.6342
7.69788			60.9624			78.7
7.75211			61.1024			78.7661
7.80993			61.2426			78.8326
7.87124			61.3829			78.8994
7.93598			61.5234			78.9665
8.00405			61.6642			79.034
8.07538			61.805			79.1018
8.14988			61.9461			79.1699
8.22745			62.0874			79.2384
8.30802			62.2288			79.3072
8.39151			62.3704			79.3763
8.47781			62.5122			79.4457
8.56685			62.6541			79.5155
8.65855			62.7962			79.5856
8.75281			62.9385			79.6561
8.84956			63.081			79.7268
8.94872			63.2236			79.7979
9.05021			63.3664			79.8693
9.15395			63.5094			79.9411
9.25987			63.6525			80.0131
9.36788			63.7958			80.0855
9.47792			63.9392			80.1582
9.58993			64.0828			80.2312
9.70382			64.2266			80.3045
9.81954			64.3705			80.3782
9.93703			64.5146			80.4521
10.0562			64.6588			80.5264
10.177			64.8032			80.601
10.2994			64.9478			80.6759
10.4234			65.0925			80.7512
10.5488			65.2373			80.8267
10.6756			65.3824			80.9025
10.8038			65.5275			80.9787
10.9333			65.6728			81.0552
11.0641			65.8183			81.1319
11.1962			49.2115			81.2864
11.3294			49.3272			75.1647
11.4637			49.4433			75.2089
11.5992			49.5597			75.2535
11.7358			49.6765			75.2984
11.8733			49.911			75.3437
12.0119			50.3843			75.3895
12.1514			50.5034			75.4356
12.2919			50.6229			75.482
12.4333			50.7427			75.5289
12.5755			50.8628			75.5761
12.7186			50.9832			75.6237
12.8625			54.0929			75.6717
13.0071			54.221			75.7201
13.1525			54.3494			75.7689
13.2987			54.478			75.818
13.4456			54.6069			75.8675
13.5931			54.736			75.9174
0			54.8654			75.9676
0			54.9951			76.0182
0			55.125			76.0692
0			55.2552			76.1206
0			55.3856			76.1723
0			55.5163			76.2244
0			55.6472			76.2769
0			55.7784			76.3298
0			55.9098			76.383
0			56.0414			76.4366
0			56.1733			76.4905
0			56.3055			76.5448
0			56.4378			76.5995
0			56.5704			76.6545
0			56.7033			76.7099
0			56.8364			76.7657
0			56.9697			76.8218
0			57.1032			76.8783
0			57.237			76.9352
0			57.371			76.9924
0			57.5052			77.05
0			57.6396			77.1079
0			57.7743			77.1662
0			57.9092			77.2248
0			58.0443			77.2838
0			58.1796			77.3432
0			58.3151			77.4029
0			58.4509			77.4629
0			58.5869			77.5233
0			58.723			77.5841
0			58.8594			77.6452
0			58.996			77.7066
0			59.1328			77.7685
0			59.2698			77.8306
0			59.407			77.8931
0			59.5445			77.956
0			59.6821			78.0192
0			59.8199			78.0827
0			59.9579			78.1466
0			60.0961			78.2108
0			60.2345			78.2754
0			60.3731			78.3403
0			60.5119			78.4055
0			60.6509			78.4711
0			60.7901			78.537
0			60.9294			78.6033
0			61.069			78.6699
0			61.2087			78.7369
0			61.3487			78.8041
7.17378			61.4888			78.8717
7.17188			61.6291			78.9397
7.17429			61.7695			79.008
7.181			61.9102			79.0766
7.192			62.051			79.1455
7.20728			62.192			79.2148
7.22679			62.3332			79.2844
7.25052			62.4746			79.3543
7.27842			62.6161			79.4245
7.31044			62.7578			79.4951
7.34653			62.8997			79.566
7.38662			63.0418			79.6372
7.43066			63.184			79.7088
7.47857			63.3264			79.7807
7.53028			63.469			79.8529
7.58571			63.6117			79.9254
7.64478			63.7546			79.9982
7.70741			63.8976			80.0714
7.77351			64.0409			80.1449
7.843			64.1842			80.2187
7.91578			64.3278			80.2928
7.99176			64.4715			80.3672
8.07086			64.6153			80.442
8.15298			64.7593			80.517
8.23803			64.9035			80.5924
8.32592			65.0479			80.6681
8.41657			65.1923			80.7441
8.50989			65.337			80.8204
8.60578			65.4818			80.897
8.70417			65.6267			80.9739
8.80497			65.7718			81.0512
8.90809			65.917			81.1287
9.01347			49.3441			81.2066
9.12101			49.4595			74.9946
9.23065			49.5753			75.0388
9.34231			49.6914			75.0835
9.45592			49.8079			75.1285
9.57141			50.0418			75.174
9.68871			50.5138			75.2198
9.80777			50.6326			75.266
9.9285			50.7518			75.3126
10.0509			50.8713			75.3595
10.1748			50.9911			75.4069
10.3002			51.1113			75.4546
10.4271			51.2317			75.5027
10.5554			54.2136			75.5512
10.685			54.3414			75.6
10.816			54.4695			75.6493
10.9482			54.5978			75.6989
11.0816			54.7264			75.7489
11.2162			54.8553			75.7992
11.3519			54.9844			75.85
11.4887			55.1138			75.9011
11.6265			55.2434			75.9526
11.7654			55.3733			76.0044
11.9052			55.5035			76.0566
12.046			55.6339			76.1092
12.1877			55.7645			76.1622
12.3302			55.8954			76.2155
12.4736			56.0265			76.2692
12.6178			56.1579			76.3233
12.7629			56.2895			76.3777
12.9086			56.4214			76.4325
13.0552			56.5535			76.4877
13.2024			56.6858			76.5432
13.3503			56.8184			76.5991
13.4989			56.9512			76.6553
13.6482			57.0843			76.712
13.798			57.2175			76.7689
0			57.351			76.8263
0			57.4848			76.884
0			57.6187			76.942
0			57.7529			77.0004
0			57.8873			77.0592
0			58.0219			77.1183
0			58.1568			77.1778
0			58.2918			77.2376
0			58.4271			77.2978
0			58.5626			77.3583
0			58.6983			77.4192
0			58.8342			77.4805
0			58.9704			77.542
0			59.1067			77.604
0			59.2432			77.6663
0			59.38			77.7289
0			59.5169			77.7919
0			59.6541			77.8552
0			59.7915			77.9189
0			59.929			77.9829
0			60.0668			78.0473
0			60.2048			78.112
0			60.3429			78.177
0			60.4813			78.2424
0			60.6198			78.3081
0			60.7586			78.3742
0			60.8975			78.4406
0			61.0366			78.5073
0			61.1759			78.5744
0			61.3154			78.6418
0			61.4551			78.7096
0			61.595			78.7777
0			61.735			78.8461
0			61.8752			78.9148
0			62.0157			78.9839
0			62.1563			79.0533
0			62.297			79.123
0			62.438			79.1931
0			62.5791			79.2635
0			62.7204			79.3342
0			62.8619			79.4053
0			63.0035			79.4766
0			63.1454			79.5483
0			63.2874			79.6204
0			63.4295			79.6927
0			63.5718			79.7654
0			63.7143			79.8384
0			63.857			79.9117
0			63.9998			79.9853
0			64.1428			80.0592
0			64.286			80.1335
0			64.4293			80.2081
0			64.5728			80.283
6.99805			64.7164			80.3582
6.9961			64.8602			80.4337
6.99857			65.0041			80.5095
7.00545			65.1482			80.5857
7.01673			65.2925			80.6621
7.03238			65.4369			80.7389
7.05238			65.5815			80.816
7.07669			65.7262			80.8934
7.10528			65.8711			80.9711
7.13807			66.0161			81.1274
7.17502			49.2479			74.7804
7.21607			49.3623			74.8244
7.26114			49.477			74.8688
7.31017			49.5921			74.9135
7.36306			49.7076			74.9587
7.41974			49.8234			75.0042
7.48012			49.9395			75.0502
7.54412			50.1728			75.0965
7.61164			50.5254			75.1431
7.68259			50.6436			75.1902
7.75687			50.7621			75.2377
7.8344			51.0002			75.2855
7.91506			51.1197			75.3337
7.99878			51.2396			75.3823
8.08546			51.3597			75.4313
8.17499			54.0804			75.4806
8.2673			54.2074			75.5303
8.36228			54.3346			75.5804
8.45985			54.4621			75.6309
8.55991			54.5899			75.6817
8.66239			54.718			75.733
8.76719			54.8463			75.7846
8.87424			54.9749			75.8365
8.98345			55.1037			75.8889
9.09475			55.2328			75.9416
9.20806			55.3622			75.9946
9.3233			55.4918			76.0481
9.44042			55.6216			76.1019
9.55933			55.7518			76.1561
9.67997			55.8821			76.2106
9.80228			56.0127			76.2656
9.92619			56.1436			76.3209
10.0517			56.2747			76.3765
10.1786			56.4061			76.4325
10.307			56.5377			76.4889
10.4368			56.6695			76.5456
10.5679			56.8016			76.6027
10.7002			56.9339			76.6602
10.8338			57.0664			76.718
10.9687			57.1992			76.7762
11.1046			57.3322			76.8347
11.2417			57.4654			76.8936
11.3798			57.5989			76.9528
11.5189			57.7326			77.0125
11.6591			57.8665			77.0724
11.8001			58.0006			77.1327
11.9422			58.135			77.1934
12.085			58.2696			77.2544
12.2288			58.4044			77.3158
12.3734			58.5394			77.3775
12.5188			58.6746			77.4396
12.6649			58.8101			77.502
12.8118			58.9457			77.5648
12.9594			59.0816			77.6279
13.1077			59.2177			77.6913
13.2567			59.354			77.7551
13.4063			59.4905			77.8193
13.5566			59.6272			77.8838
13.7075			59.7641			77.9486
13.8589			59.9012			78.0138
0			60.0385			78.0793
0			60.176			78.1452
0			60.3137			78.2114
0			60.4516			78.2779
0			60.5897			78.3448
0			60.728			78.412
0			60.8665			78.4796
0			61.0052			78.5475
0			61.1441			78.6157
0			61.2832			78.6843
0			61.4224			78.7531
0			61.5618			78.8224
0			61.7015			78.8919
0			61.8413			78.9618
0			61.9813			79.032
0			62.1215			79.1025
0			62.2618			79.1734
0			62.4023			79.2446
0			62.5431			79.3161
0			62.6839			79.388
0			62.825			79.4601
0			62.9663			79.5326
0			63.1077			79.6054
0			63.2493			79.6786
0			63.391			79.752
0			63.5329			79.8258
0			63.675			79.8999
0			63.8173			79.9743
0			63.9597			80.049
0			64.1023			80.1241
0			64.2451			80.1994
0			64.388			80.2751
0			64.5311			80.3511
0			64.6744			80.4274
0			64.8178			80.504
0			64.9613			80.5809
0			65.1051			80.6581
0			65.2489			80.7357
0			65.393			80.8135
0			65.5372			80.8917
0			65.6815			80.9701
0			65.826			74.5665
0			65.9707			74.6102
0			49.3817			74.6543
0			49.4958			74.6988
0			49.6102			74.7436
0			49.725			74.7889
0			49.8401			74.8345
0			49.9556			74.8805
0			50.1876			74.927
0			50.7737			74.9737
0			51.0105			75.0209
0			51.1294			75.0685
6.82232			51.2486			75.1164
6.82032			51.3681			75.1647
6.82285			51.488			75.2134
6.82991			54.2022			75.2625
6.84147			54.3289			75.312
6.85753			54.4559			75.3618
6.87804			54.5831			75.412
6.90297			54.7106			75.4626
6.93226			54.8384			75.5135
6.96587			54.9664			75.5649
7.00374			55.0947			75.6166
7.04578			55.2233			75.6687
7.09193			55.3521			75.7211
7.14212			55.4812			75.774
7.19625			55.6105			75.8271
7.25423			55.7401			75.8807
7.31598			55.87			75.9347
7.3814			56.0001			75.989
7.4504			56.1304			76.0436
7.52286			56.261			76.0987
7.59871			56.3918			76.1541
7.67783			56.5229			76.2098
7.76013			56.6542			76.266
7.8455			56.7858			76.3225
7.93385			56.9176			76.3793
8.02508			57.0496			76.4366
8.11909			57.1819			76.4941
8.21578			57.3144			76.5521
8.31507			57.4471			76.6104
8.41685			57.5801			76.669
8.52105			57.7133			76.7281
8.62757			57.8467			76.7874
8.73633			57.9804			76.8472
8.84724			58.1142			76.9073
8.96023			58.2483			76.9677
9.07522			58.3827			77.0285
9.19213			58.5172			77.0896
9.3109			58.652			77.1511
9.43144			58.7869			77.213
9.5537			58.9221			77.2752
9.6776			59.0575			77.3378
9.80309			59.1931			77.4007
9.93011			59.329			77.4639
10.0586			59.465			77.5275
10.1885			59.6013			77.5914
10.3198			59.7377			77.6557
10.4523			59.8744			77.7204
10.5861			60.0112			77.7853
10.7212			60.1483			77.8507
10.8574			60.2855			77.9163
10.9947			60.423			77.9823
11.1331			60.5607			78.0487
11.2726			60.6985			78.1153
11.413			60.8366			78.1824
11.5544			60.9748			78.2497
11.6968			61.1133			78.3174
11.84			61.2519			78.3854
11.9841			61.3907			78.4538
12.1291			61.5297			78.5225
12.2749			61.6689			78.5915
12.4214			61.8083			78.6609
12.5687			61.9479			78.7306
12.7167			62.0876			78.8006
12.8654			62.2276			78.871
13.0148			62.3677			78.9416
13.1648			62.508			79.0126
13.3155			62.6484			79.084
13.4667			62.7891			79.1556
13.6186			62.9299			79.2276
13.771			63.0709			79.2999
13.924			63.2121			79.3726
14.0775			63.3535			79.4455
0			63.495			79.5188
0			63.6367			79.5924
0			63.7786			79.6663
0			63.9206			79.7406
0			64.0628			79.8151
0			64.2052			79.89
0			64.3477			79.9652
0			64.4904			80.0407
0			64.6333			80.1165
0			64.7763			80.1927
0			64.9195			80.2691
0			65.0628			80.3459
0			65.2063			80.4229
0			65.35			80.5003
0			65.4938			80.578
0			65.6378			80.656
0			65.7819			80.7343
0			65.9262			80.8129
0			66.0706			74.3097
0			49.5157			74.3528
0			49.6295			74.44
0			49.7436			74.4842
0			49.8581			74.5288
0			49.9729			74.5737
0			50.0881			74.6191
0			50.2036			74.6648
0			50.9041			74.711
0			51.1403			74.7575
0			51.2588			74.8044
0			51.3778			74.8517
0			51.497			74.8993
0			51.7365			74.9474
0			54.0724			74.9958
0			54.1982			75.0446
0			54.3244			75.0938
0			54.4508			75.1433
0			54.5775			75.1933
0			54.7044			75.2436
0			54.8316			75.2943
0			54.9591			75.3454
0			55.0869			75.3968
0			55.2149			75.4487
0			55.3432			75.5009
0			55.4717			75.5534
0			55.6005			75.6064
0			55.7296			75.6597
0			55.8589			75.7134
0			55.9885			75.7674
0			56.1183			75.8219
0			56.2484			75.8766
0			56.3787			75.9318
0			56.5092			75.9873
0			56.64			76.0432
0			56.7711			76.0995
6.64659			56.9024			76.1561
6.64454			57.0339			76.2131
6.64714			57.1657			76.2704
6.65438			57.2977			76.3281
6.66625			57.4299			76.3862
6.68273			57.5624			76.4446
6.70377			57.6951			76.5034
6.72934			57.828			76.5626
6.75939			57.9612			76.6221
6.79386			58.0946			76.6819
6.83267			58.2282			76.7422
6.87577			58.362			76.8027
6.92305			58.4961			76.8637
6.97445			58.6304			76.9249
7.02987			58.7649			76.9866
7.08922			58.8996			77.0486
7.15239			59.0345			77.1109
7.2193			59.1697			77.1736
7.28982			59.305			77.2366
7.36387			59.4406			77.3
7.44134			59.5764			77.3637
7.52212			59.7123			77.4278
7.6061			59.8485			77.4922
7.69318			59.9849			77.557
7.78326			60.1216			77.6221
7.87623			60.2584			77.6876
7.97199			60.3954			77.7534
8.07045			60.5326			77.8195
8.1715			60.67			77.886
8.27506			60.8076			77.9528
8.38102			60.9454			78.0199
8.48929			61.0834			78.0874
8.5998			61.2216			78.1553
8.71245			61.36			78.2234
8.82717			61.4986			78.292
8.94387			61.6373			78.3608
9.06248			61.7763			78.43
9.18292			61.9154			78.4995
9.30512			62.0548			78.5693
9.42901			62.1943			78.6395
9.55453			62.334			78.71
9.68162			62.4739			78.7808
9.81021			62.6139			78.8519
9.94025			62.7542			78.9234
10.0717			62.8946			78.9952
10.2044			63.0352			79.0674
10.3385			63.1759			79.1398
10.4738			63.3169			79.2126
10.6102			63.458			79.2857
10.7478			63.5993			79.3592
10.8865			63.7408			79.4329
11.0263			63.8824			79.507
11.1671			64.0242			79.5814
11.3088			64.1662			79.6561
11.4515			64.3083			79.7311
11.5952			64.4506			79.8064
11.7397			64.5931			79.8821
11.885			64.7357			79.9581
12.0311			64.8785			80.0343
12.1781			65.0215			80.1109
12.3257			65.1646			80.1879
12.4742			65.3079			80.2651
12.6233			65.4513			80.3426
12.7731			65.5949			80.4205
12.9235			65.7387			80.4986
13.0746			65.8826			80.5771
13.2263			66.0266			80.6558
13.3786			66.1708			73.9295
13.5314			49.65			74.1393
13.6848			49.7635			74.1824
13.8388			49.8773			74.2259
13.9932			49.9915			74.2698
14.1481			50.106			74.3141
14.3036			50.2209			74.3588
0			50.3361			74.4039
0			51.0347			74.4493
0			51.1523			74.4952
0			51.2703			74.5414
0			51.3886			74.588
0			51.5072			74.635
0			54.1954			74.6824
0			54.321			74.7302
0			54.4468			74.7783
0			54.5729			74.8269
0			54.6993			74.8758
0			54.826			74.9251
0			54.9529			74.9748
0			55.0802			75.0248
0			55.2076			75.0753
0			55.3354			75.1261
0			55.4634			75.1773
0			55.5916			75.2288
0			55.7202			75.2808
0			55.8489			75.3331
0			55.978			75.3858
0			56.1073			75.4388
0			56.2368			75.4923
0			56.3666			75.5461
0			56.4967			75.6002
0			56.6269			75.6548
0			56.7575			75.7097
0			56.8883			75.765
0			57.0193			75.8206
0			57.1505			75.8766
0			57.282			75.933
0			57.4138			75.9898
0			57.5457			76.0469
0			57.678			76.1043
0			57.8104			76.1622
0			57.9431			76.2204
0			58.076			76.2789
0			58.2091			76.3379
0			58.3424			76.3971
0			58.476			76.4568
0			58.6098			76.5168
0			58.7438			76.5771
0			58.8781			76.6378
0			59.0125			76.6989
0			59.1472			76.7603
0			59.2821			76.822
0			59.4172			76.8842
0			59.5525			76.9466
0			59.688			77.0094
0			59.8238			77.0726
0			59.9597			77.1361
0			60.0959			77.2
0			60.2322			77.2642
0			60.3688			77.3288
0			60.5055			77.3937
0			60.6425			77.4589
0			60.7797			77.5245
0			60.917			77.5904
0			61.0546			77.6567
0			61.1923			77.7233
0			61.3303			77.7903
0			61.4684			77.8576
0			61.6068			77.9252
0			61.7453			77.9932
6.47087			61.884			78.0615
6.46876			62.0229			78.1302
6.47143			62.162			78.1991
6.47887			62.3012			78.2685
6.49106			62.4407			78.3381
6.50798			62.5803			78.4081
6.52959			62.7202			78.4784
6.55584			62.8602			78.549
6.58668			63.0004			78.62
6.62204			63.1407			78.6913
6.66186			63.2812			78.7629
6.70605			63.422			78.8349
6.75452			63.5629			78.9072
6.8072			63.7039			78.9798
6.86397			63.8451			79.0527
6.92473			63.9865			79.126
6.9894			64.1281			79.1995
7.05784			64.2699			79.2734
7.12997			64.4118			79.3477
7.20566			64.5539			79.4222
7.28481			64.6961			79.4971
7.3673			64.8385			79.5722
7.45303			64.9811			79.6477
7.54188			65.1238			79.7235
7.63374			65.2667			79.7997
7.72851			65.4098			79.8761
7.82609			65.553			79.9528
7.92636			65.6963			80.0299
8.02922			65.8399			80.1073
8.13458			65.9836			80.185
8.24235			66.1274			80.263
8.35243			66.2714			80.3413
8.46472			49.7846			80.4199
8.57915			49.8977			80.4988
8.69562			50.0112			80.578
8.81406			50.1251			80.6575
8.93439			50.2393			80.7374
9.05654			50.932			73.926
9.18042			51.0486			73.9688
9.30598			51.1656			74.012
9.43314			51.283			74.0557
9.56184			51.4006			74.0997
9.69202			51.5186			74.1441
9.82362			51.6369			74.1889
9.95658			51.7556			74.234
10.0909			54.1937			74.2796
10.2264			54.3187			74.3255
10.3631			54.444			74.3719
10.501			54.5695			74.4186
10.6401			54.6954			74.4657
10.7801			54.8215			74.5132
10.9213			54.9479			74.5611
11.0634			55.0745			74.6094
11.2065			55.2015			74.658
11.3505			55.3287			74.707
11.4953			55.4561			74.7564
11.6411			55.5839			74.8062
11.7876			55.7118			74.8564
11.935			55.8401			74.9069
12.083			55.9686			74.9579
12.2319			56.0974			75.0092
12.3814			56.2264			75.0609
12.5316			56.3556			75.1129
12.6825			56.4852			75.1653
12.834			56.6149			75.2182
12.9861			56.745			75.2713
13.1389			56.8752			75.3249
13.2921			57.0057			75.3788
13.446			57.1365			75.4331
13.6003			57.2675			75.4878
13.7552			57.3987			75.5428
13.9106			57.5302			75.5982
14.0665			57.6619			75.654
14.2228			57.7938			75.7101
0			57.926			75.7666
0			58.0584			75.8235
0			58.191			75.8807
0			58.3239			75.9383
0			58.457			75.9963
0			58.5903			76.0546
0			58.7238			76.1133
0			58.8576			76.1723
0			58.9916			76.2317
0			59.1258			76.2915
0			59.2602			76.3516
0			59.3948			76.4121
0			59.5297			76.4729
0			59.6647			76.5341
0			59.8			76.5957
0			59.9355			76.6576
0			60.0712			76.7198
0			60.2071			76.7824
0			60.3432			76.8454
0			60.4795			76.9087
0			60.616			76.9723
0			60.7527			77.0363
0			60.8896			77.1007
0			61.0267			77.1654
0			61.164			77.2304
0			61.3016			77.2958
0			61.4393			77.3615
0			61.5772			77.4276
0			61.7152			77.494
0			61.8535			77.5608
0			61.992			77.6279
0			62.1307			77.6953
0			62.2695			77.7631
0			62.4085			77.8312
0			62.5478			77.8997
0			62.6872			77.9684
0			62.8267			78.0376
0			62.9665			78.107
0			63.1064			78.1768
0			63.2466			78.2469
0			63.3869			78.3174
0			63.5274			78.3882
0			63.668			78.4593
0			63.8088			78.5308
0			63.9498			78.6025
0			64.091			78.6746
0			64.2324			78.7471
0			64.3739			78.8198
0			64.5156			78.8929
0			64.6574			78.9663
0			64.7994			79.04
0			64.9416			79.1141
0			65.0839			79.1884
0			65.2265			79.2631
0			65.3691			79.3381
0			65.512			79.4134
0			65.6549			79.4891
0			65.7981			79.565
0			65.9414			79.6413
0			66.0849			79.7179
0			66.2285			79.7948
0			66.3723			79.872
0			66.5162			79.9496
0			49.9194			80.0274
0			50.0322			80.1055
0			50.1454			80.184
6.29514			50.259			80.2628
6.29298			50.3729			80.3418
6.29572			50.4872			80.4212
6.30337			50.9478			80.5009
6.3159			51.0638			80.5809
6.33328			51.1801			73.6291
6.35549			51.2968			73.6708
6.38246			51.4138			73.7129
6.41413			51.5312			73.7555
6.45044			51.6489			73.7984
6.49131			51.7669			73.8417
6.53665			54.1931			73.8854
6.58637			54.3175			73.9295
6.64038			54.4423			73.974
6.69856			54.5673			74.0189
6.76082			54.6925			74.0642
6.82703			54.8181			74.1099
6.89709			54.9439			74.1559
6.97088			55.0701			74.2024
7.04828			55.1964			74.2492
7.12918			55.3231			74.2964
7.21345			55.45			74.344
7.30098			55.5772			74.392
7.39166			55.7046			74.4404
7.48537			55.8323			74.4892
7.582			55.9603			74.5383
7.68143			56.0885			74.5878
7.78356			56.217			74.6377
7.88829			56.3458			74.688
7.99551			56.4748			74.7387
8.10513			56.604			74.7897
8.21704			56.7335			74.8411
8.33116			56.8633			74.8929
8.4474			56.9933			74.9451
8.56566			57.1235			74.9976
8.68588			57.254			75.0506
8.80796			57.3847			75.1039
8.93183			57.5157			75.1575
9.05742			57.6469			75.2116
9.18466			57.7783			75.266
9.31347			57.91			75.3208
9.4438			58.0419			75.3759
9.57559			58.174			75.4315
9.70877			58.3064			75.4874
9.84328			58.439			75.5436
9.97908			58.5718			75.6002
10.1161			58.7049			75.6572
10.2543			58.8382			75.7146
10.3937			58.9717			75.7723
10.5341			59.1054			75.8304
10.6756			59.2393			75.8889
10.8181			59.3735			75.9477
10.9615			59.5079			76.0068
11.1059			59.6425			76.0664
11.2512			59.7773			76.1263
11.3973			59.9123			76.1865
11.5443			60.0475			76.2471
11.6921			60.1829			76.3081
11.8406			60.3186			76.3694
11.9899			60.4544			76.4311
12.1398			60.5905			76.4931
12.2905			60.7268			76.5555
12.4418			60.8632			76.6182
12.5938			60.9999			76.6813
12.7463			61.1368			76.7448
12.8995			61.2738			76.8086
13.0532			61.4111			76.8727
13.2075			61.5485			76.9372
13.3623			61.6862			77.002
13.5176			61.824			77.0672
13.6734			61.9621			77.1327
13.8297			62.1003			77.1986
13.9865			62.2387			77.2648
14.1437			62.3773			77.3314
0			62.5161			77.3983
0			62.6551			77.4655
0			62.7943			77.5331
0			62.9336			77.601
0			63.0731			77.6693
0			63.2129			77.7379
0			63.3527			77.8068
0			63.4928			77.8761
0			63.6331			77.9457
0			63.7735			78.0156
0			63.9141			78.0859
0			64.0548			78.1565
0			64.1958			78.2274
0			64.3369			78.2987
0			64.4782			78.3703
0			64.6196			78.4422
0			64.7613			78.5144
0			64.903			78.587
0			65.045			78.6599
0			65.1871			78.7331
0			65.3294			78.8067
0			65.4718			78.8806
0			65.6145			78.9547
0			65.7572			79.0293
0			65.9002			79.1041
0			66.0432			79.1793
0			66.1865			79.2547
0			66.3299			79.3305
0			66.4734			79.4066
0			66.6172			79.4831
0			49.0584			79.5598
0			49.387			79.6369
0			49.9423			79.7142
0			50.0545			79.7919
0			50.167			79.8699
0			50.2799			79.9482
0			50.3931			80.0268
0			50.5068			80.1057
0			50.6207			80.185
0			51.0801			80.2645
0			51.1958			80.3443
[truncated: 27,127 more rows]
