# Supplementary material for: Visual pursuit behavior in mice maintains the pursued prey on the retinal region with least optic flow
Source: eLife. 2021 Oct 26;10:e70838. doi: 10.7554/eLife.70838 (PMC8547958; doi:10.7554/eLife.70838)
Supplement: Figure 4—source data 1. [file elife-70838-fig4-data1.xlsx]

## Sheet: 4B
Left Eye	Head X (o)	Eye X (o)	N	Right Eye (o)	Head X (o)	Eye X (o)	N			Left Eye	Head Y (o)	Eye Y (o)	N	Right Eye (o)	Head Y (o)	Eye Y (o)	N
	15.7385	-2.83324	154625		15.7385	-5.23147	154625				-44.9994	23.624	165432		-44.9994	27.9484	165432
	20.5956	-3.63548			20.5956	-5.73999					-43.892	23.5898			-43.892	28.4483
	23.2312	-4.45916			23.2312	-6.25822					-44.4081	23.5607			-44.4081	28.9612
	25.4668	-5.22386			25.4668	-6.6235					-44.0004	23.5932			-44.0004	29.4172
	26.0994	-5.68249			26.0994	-6.28117					-44.1082	23.8864			-44.1082	29.5928
	28.4987	-6.15439			28.4987	-5.92783					-42.3607	19.8138			-42.3607	27.0299
	28.5388	-6.62559			28.5388	-5.5739					-41.3291	20.273			-41.3291	26.6125
	18.5061	-2.01964			18.5061	-3.61285					-41.199	20.7353			-41.199	26.1946
	18.2877	-2.6875			18.2877	-3.87921					-43.1065	21.1907			-43.1065	25.7863
	18.1768	-3.37711			18.1768	-4.14306					-41.5428	22.5131			-41.5428	25.4678
	20.6864	-4.07179			20.6864	-4.39826					-39.8066	24.3507			-39.8066	25.2047
	20.2575	-5.2352			20.2575	-4.81605					-40.2777	26.2221			-40.2777	24.9395
	20.933	-6.61897			20.933	-5.32196					-39.2426	26.7791			-39.2426	24.6513
	21.9887	-7.96845			21.9887	-5.82542					-38.8339	23.6972			-38.8339	24.276
	23.053	-8.60316			23.053	-6.36536					-39.763	20.6345			-39.763	23.8969
	19.9958	-7.31977			19.9958	-7.05811					-41.4451	17.6702			-41.4451	23.5232
	20.7396	-5.90286			20.7396	-7.74627					-39.0986	16.7171			-39.0986	23.6238
	22.6926	-4.39307			22.6926	-8.41371					-38.0374	16.0393			-38.0374	23.7791
	23.321	-4.5709			23.321	-9.44715					-37.7496	15.3778			-37.7496	23.921
	23.2641	-4.98815			23.2641	-10.533					-38.6594	16.3518			-38.6594	24.1142
	25.1016	-5.39773			25.1016	-11.6008					-38.2241	18.9874			-38.2241	24.36
	27.0769	-6.86394			27.0769	-11.9303					-36.1799	21.6538			-36.1799	24.5996
	28.1902	-9.29507			28.1902	-11.5169					-37.2309	24.1626			-37.2309	24.867
	26.7231	-11.6265			26.7231	-11.1101					-37.7479	24.7094			-37.7479	25.289
	27.1054	-13.7489			27.1054	-10.8883					-38.8678	25.2473			-38.8678	25.6922
	27.3237	-14.4054			27.3237	-11.9922					-37.3905	25.8061			-37.3905	26.0987
	27.8179	-15.053			27.8179	-13.0746					-38.3281	25.4182			-38.3281	26.362
	31.3165	-15.7278			31.3165	-14.1951					-36.5427	24.7349			-36.5427	26.5742
	29.0736	-15.6358			29.0736	-14.4246					-35.85	24.0333			-35.85	26.7919
	27.6917	-15.2953			27.6917	-14.3612					-35.7633	23.9602			-35.7633	26.9898
	31.6627	-14.942			31.6627	-14.296					-36.3209	24.9145			-36.3209	27.1492
	30.5872	-14.5805			30.5872	-14.1536					-36.3906	25.895			-36.3906	27.3123
	32.0666	-14.22			32.0666	-13.8892					-38.9795	26.8766			-38.9795	27.4748
	31.6785	-13.8467			31.6785	-13.6171					-38.3588	30.2763			-38.3588	27.7883
	32.2942	-13.4697			32.2942	-13.3442					-39.761	33.7975			-39.761	28.1049
	34.0962	-15.0107			34.0962	-12.5202					-41.5173	37.3409			-41.5173	28.4162
	30.5772	-16.4716			30.5772	-11.6691					-39.0612	39.3434			-39.0612	28.3496
	32.6129	-17.7986			32.6129	-10.8133					-38.7896	40.3937			-38.7896	28.033
	29.9195	-17.8059			29.9195	-9.96148					-39.1486	41.4042			-39.1486	27.7094
	28.3974	-16.985			28.3974	-9.08657					-39.3444	40.6862			-39.3444	27.3937
	28.7083	-16.1134			28.7083	-8.21969					-39.3481	34.0333			-39.3481	27.0909
	27.3187	-14.8386			27.3187	-7.40212					-40.6637	27.5671			-40.6637	26.785
	25.416	-11.8463			25.416	-6.6438					-39.9336	21.4785			-39.9336	26.4828
	22.6185	-8.37359			22.6185	-5.88752					-38.9133	23.3704			-38.9133	26.2249
	23.1078	-4.53436			23.1078	-5.14975					-38.3455	26.8697			-38.3455	25.9702
	21.5756	-6.03732			21.5756	-4.00137					-39.1398	30.3878			-39.1398	25.7143
	20.2628	-8.51624			20.2628	-2.77318					-38.956	28.2616			-38.956	25.4281
	16.9628	-10.8386			16.9628	-1.56966					-40.5615	19.962			-40.5615	25.1199
	16.3413	-9.29246			16.3413	-0.660014					-40.3643	12.6657			-40.3643	24.8189
	16.6931	-2.86853			16.6931	-0.121752					-40.6885	6.83537			-40.6885	24.5301
	17.0363	4.05297			17.0363	0.404235					-39.5591	8.27183			-39.5591	24.4511
	15.6568	11.0258			15.6568	0.923541					-41.5428	9.72624			-41.5428	24.3737
	15.0602	9.26421			15.0602	1.22815					-41.0646	11.264			-41.0646	24.2943
	13.1279	7.5853			13.1279	1.52571					-40.1422	13.822			-40.1422	24.3145
	13.6993	5.90992			13.6993	1.83014					-39.7281	16.8232			-39.7281	24.3746
	12.5713	4.13678			12.5713	2.31347					-41.528	19.7849			-41.528	24.4316
	12.2087	2.46046			12.2087	2.87061					-40.7025	22.0338			-40.7025	24.4143
	11.9225	0.988413			11.9225	3.41482					-41.7572	22.6112			-41.7572	24.2451
	9.82501	0.156729			9.82501	3.78472					-40.5482	23.1552			-40.5482	24.0806
	11.9354	0.431339			11.9354	3.76774					-40.3929	23.6956			-40.3929	23.9116
	10.9775	0.708341			10.9775	3.75113					-40.57	24.357			-40.57	24.7899
	9.82557	1.00249			9.82557	3.73394					-40.9484	25.0158			-40.9484	25.6986
	9.17197	0.459862			9.17197	3.43023					-42.5019	25.6976			-42.5019	26.6298
	8.34599	-0.105676			8.34599	3.1174					-41.6116	25.9939			-41.6116	27.1681
	6.72356	-0.679466			6.72356	2.79419					-42.863	26.0045			-42.863	27.406
	6.7766	-0.445538			6.7766	2.98454					-43.6151	26.0219			-43.6151	27.6467
	7.74055	0.363591			7.74055	3.54714					-16.2074	9.17933			-16.2074	-0.932347
	4.34745	1.18861			4.34745	4.12626					-17.7269	9.61422			-17.7269	-0.925241
	-24.9258	17.6277			-24.9258	20.7034					-14.8859	10.0779			-14.8859	-0.917965
	-24.8478	16.5989			-24.8478	20.724					-14.7679	10.5596			-14.7679	-0.910695
	-23.1558	15.5495			-23.1558	20.7452					-15.936	10.9234			-15.936	-1.0225
	-20.4595	14.5049			-20.4595	20.7663					-15.9386	11.2303			-15.9386	-1.21364
	-19.3197	13.8916			-19.3197	20.3095					-15.5105	11.5412			-15.5105	-1.41297
	-19.3299	13.5002			-19.3299	19.5606					-14.694	12.1493			-14.694	-1.57495
	-19.9522	13.1104			-19.9522	18.8116					-15.0419	13.7625			-15.0419	-1.61357
	-21.2445	12.3655			-21.2445	18.388					-15.4245	15.4494			-15.4245	-1.63849
	-22.7846	10.4941			-22.7846	18.8943					-13.6085	17.1634			-13.6085	-1.64958
	-23.0553	8.67959			-23.0553	19.3999					-13.4455	18.0591			-13.4455	-1.61248
	-21.9203	6.96375			-21.9203	19.8927					-13.8876	18.8382			-13.8876	-1.56703
	-22.8093	5.74839			-22.8093	20.2863					-13.2746	19.6222			-13.2746	-1.52061
	-22.8422	4.61853			-22.8422	20.6624					-13.6046	18.3863			-13.6046	-1.46763
	-20.5813	3.5217			-20.5813	21.0294					-13.7036	15.1344			-13.7036	-1.41089
	-20.5428	4.44323			-20.5428	21.3043					-11.9488	12.1834			-11.9488	-1.35591
	-20.7013	7.65589			-20.7013	21.4727					-12.2447	9.93202			-12.2447	-1.59773
	-19.8109	10.9651			-19.8109	21.6372					-15.7321	12.0246			-15.7321	-4.24056
	-21.3446	13.9446			-21.3446	21.949					-14.1549	14.0297			-14.1549	-6.74422
	-21.6484	12.2812			-21.6484	23.2038					-14.2237	16.0324			-14.2237	-9.17135
	-23.147	10.7372			-23.147	24.0371					-13.9958	16.0844			-13.9958	-11.1264
	-22.2452	9.22614			-22.2452	24.4881					-13.6897	15.4184			-13.6897	-12.9027
	-22.8359	9.07208			-22.8359	24.6982					-12.4304	14.7078			-12.4304	-14.7147
	-22.9596	9.35119			-22.9596	24.8613					-9.93093	13.7622			-9.93093	-16.0437
	-23.4097	9.58189			-23.4097	24.9717					-9.97093	12.46			-9.97093	-16.5022
	-21.447	9.81838			-21.447	24.8503					-6.28739	11.1173			-6.28739	-16.9754
	-22.4647	10.1689			-22.4647	24.4148					-7.4388	9.7672			-7.4388	-17.452
	-22.2199	10.5719			-22.2199	23.9775					-7.20393	9.06655			-7.20393	-17.8482
	-23.2074	11.0192			-23.2074	23.5491					-4.73276	8.30398			-4.73276	-18.1337
	-23.9006	10.4457			-23.9006	24.1258					-0.0901131	7.48631			-0.0901131	-18.296
	-23.3628	9.85019			-23.3628	24.7472					-1.12387	6.92742			-1.12387	-18.4589
	-23.3362	9.27724			-23.3362	25.3611					-3.27188	6.53802			-3.27188	-18.6565
	-22.6785	9.2222			-22.6785	25.8998					-2.86923	6.13338			-2.86923	-18.813
	-21.8162	9.50897			-21.8162	26.4216					-2.16142	9.07458			-2.16142	-2.60877
	-21.2428	9.79216			-21.2428	26.9464					-6.49744	10.5429			-6.49744	-2.36521
	-24.0866	7.63022			-24.0866	18.0562					-7.2262	12.0216			-7.2262	-2.11095
	-25.1486	6.08163			-25.1486	17.9569					-7.74123	12.8841			-7.74123	-1.87376
	-24.3446	4.60537			-24.3446	17.8624					-7.94503	12.186			-7.94503	-1.7174
	-22.6913	3.36239			-22.6913	17.8671					-7.99445	11.4584			-7.99445	-1.56501
	-24.3963	2.44401			-24.3963	18.0899					-8.05634	10.6996			-8.05634	-1.40913
	-24.2673	1.26201			-24.2673	18.3076					-7.46637	11.1337			-7.46637	-1.26634
	-23.9468	-0.24324			-23.9468	18.5306					-6.71147	11.6453			-6.71147	-1.12819
	-23.5158	-1.02492			-23.5158	18.6252					-5.69655	12.1786			-5.69655	-0.986498
	-23.764	-1.72623			-23.764	18.709					-6.42102	12.13			-6.42102	-1.02858
	-23.1715	-2.44616			-23.1715	18.7953					-5.64941	11.6655			-5.64941	-1.21245
	-22.2711	-1.51504			-22.2711	18.9653					-5.03742	11.2193			-5.03742	-1.40164
	-23.1764	0.517967			-23.1764	19.1947					-4.47498	10.7642			-4.47498	-1.57838
	-22.8901	2.4043			-22.8901	19.4298					-8.22617	10.257			-8.22617	-1.69099
	-21.8841	3.89939			-21.8841	19.5899					-4.60726	9.74214			-4.60726	-1.80243
	-21.3562	4.41517			-21.3562	19.4104					-4.49117	9.2321			-4.49117	-1.90986
	-21.6376	4.94784			-21.6376	19.2246					-6.67808	9.5426			-6.67808	-1.85982
	-21.9249	5.48491			-21.9249	19.0367					-4.93242	10.074			-4.93242	-1.76811
	-21.1231	5.42359			-21.1231	18.5996					-6.09578	10.6057			-6.09578	-1.6763
	-22.1827	5.20469			-22.1827	18.0853					-4.00137	10.6697			-4.00137	-1.5309
	-22.6526	4.98527			-22.6526	17.5713					-8.19467	10.0615			-8.19467	-1.29611
	-23.0249	4.973			-23.0249	17.1139					-7.84061	9.45498			-7.84061	-1.05673
	-20.6425	5.26422			-20.6425	16.7121					-7.17892	8.85533			-7.17892	-0.818119
	-20.608	5.56076			-20.608	16.3124					-8.22812	7.92892			-8.22812	-0.568145
	-20.3975	5.8749			-20.3975	15.9249					-8.64654	7.02207			-8.64654	-0.313028
	-19.5729	6.97849			-19.5729	15.5821					-8.64793	6.15634			-8.64793	-0.0590043
	-20.0925	8.09932			-20.0925	15.241					-11.0596	6.1943			-11.0596	0.056709
	-19.0104	9.2104			-19.0104	14.9096					-11.2306	6.73324			-11.2306	0.0921031
	-18.5646	9.18561			-18.5646	14.6862					-11.1502	7.27531			-11.1502	0.127257
	-18.8272	8.52769			-18.8272	14.5254					-9.29134	7.6742			-9.29134	0.176655
	-18.2627	7.88074			-18.2627	14.366					-9.87303	7.6742			-9.87303	0.265744
	-19.4352	7.4137			-19.4352	14.2396					-9.17785	7.67419			-9.17785	0.355202
	-19.106	7.4137			-19.106	14.2012					-10.2859	7.6742			-10.2859	0.442885
	-19.2409	7.4137			-19.2409	14.163					-11.1508	7.03802			-11.1508	0.485359
	-18.8035	7.4137			-18.8035	14.1259					-10.7864	6.3363			-10.7864	0.522011
	-19.4184	8.16526			-19.4184	13.9808					-9.96499	5.66556			-9.96499	0.557724
	-20.0752	9.0184			-20.0752	13.8226					-10.1635	5.30713			-10.1635	0.61299
	-20.1537	9.85924			-20.1537	13.6685					-10.233	5.25449			-10.233	0.685857
	-20.3109	10.5828			-20.3109	13.677					-10.1002	5.2042			-10.1002	0.756335
	-20.4664	11.1675			-20.4664	13.8448					-10.2749	5.19432			-10.2749	0.829865
	-20.6125	11.7362			-20.6125	14.0081					-10.2938	5.45403			-10.2938	0.912855
	-20.3419	12.1289			-20.3419	14.1795					-10.2634	5.72006			-10.2634	0.993377
	-20.373	11.2936			-20.373	14.3743					-10.2403	6.00539			-10.2403	1.07535
	-20.2572	10.4764			-20.2572	14.5648					-10.2633	5.94237			-10.2633	1.17829
	-20.2614	9.63756			-20.2614	14.7601					-10.2705	5.77177			-10.2705	1.28467
	-20.3156	9.78317			-20.3156	15.0074					-9.98316	5.60076			-9.98316	1.39271
	-19.7158	10.236			-19.7158	15.2656					-9.61924	5.22217			-9.61924	1.53217
	-20.0543	10.6999			-20.0543	15.5304					-11.0567	4.53432			-11.0567	1.72124
	-20.2859	11.4574			-20.2859	15.4944					-11.5049	3.85817			-11.5049	1.91704
	-17.8178	12.6731			-17.8178	14.9782					-11.0348	3.21456			-11.0348	2.11461
	-17.9312	13.9291			-17.9312	14.4506					-10.9868	4.17251			-10.9868	2.15931
	-18.6237	15.1904			-18.6237	13.9255					-12.746	5.17439			-12.746	2.20474
	-18.736	14.0052			-18.736	14.0312					-12.6367	6.20202			-12.6367	2.25011
	-19.5298	12.8219			-19.5298	14.1391					-12.9142	6.69242			-12.9142	2.27138
	-20.8363	11.6621			-20.8363	14.2473					-13.0209	6.85662			-13.0209	2.27849
	-20.9762	11.2421			-20.9762	14.2982					-11.2348	7.02036			-11.2348	2.2856
	-20.5568	11.2559			-20.5568	14.3152					-11.8582	7.17344			-11.8582	2.30674
	-19.2619	11.2701			-19.2619	14.3322					-12.4299	7.30492			-12.4299	2.3769
	-19.9769	11.2975			-19.9769	14.383					-12.118	7.43635			-12.118	2.44667
	-20.2673	11.3706			-20.2673	14.552					-11.9806	7.56434			-11.9806	2.51428
	-20.5219	11.4439			-20.5219	14.7212					-12.4032	8.62226			-12.4032	2.87677
	-20.7795	11.5153			-20.7795	14.8862					-11.4444	9.88931			-11.4444	3.29195
	-19.3979	10.2095			-19.3979	14.687					-11.4604	11.1661			-11.4604	3.6964
	-19.2468	8.6852			-19.2468	14.4207					-11.3627	11.1829			-11.3627	3.98003
	-18.052	7.23182			-18.052	14.1612					-11.4272	9.75414			-11.4272	4.11434
	-18.0524	7.40813			-18.0524	14.0015					-11.0162	8.44037			-11.0162	4.24545
	-18.1054	9.47181			-18.1054	13.963					-11.6042	7.37287			-11.6042	4.38176
	-18.6937	11.5137			-18.6937	13.9251					-12.5237	8.28316			-12.5237	4.53864
	-19.6236	13.3265			-19.6236	13.8893					-15.0165	9.19939			-15.0165	4.69176
	-18.7175	12.1128			-18.7175	13.8867					-15.0192	10.1654			-15.0192	4.84863
	-18.4867	10.947			-18.4867	13.8839					-14.6378	10.4483			-14.6378	4.95669
	-19.5554	9.77225			-19.5554	13.8808					-12.6707	10.4483			-12.6707	5.04481
	-17.9108	9.43794			-17.9108	13.7788					-12.4485	10.4483			-12.4485	5.13056
	-17.3125	9.43793			-17.3125	13.6364					-13.9507	10.4483			-13.9507	5.31327
	-16.8657	9.43794			-16.8657	13.4967					-13.6438	10.4483			-13.6438	5.68577
	-16.8982	9.43794			-16.8982	13.3195					-14.2866	10.4483			-14.2866	6.05128
	-17.356	9.43793			-17.356	13.077					-13.7373	10.4483			-13.7373	6.42761
	-17.3202	9.43794			-17.3202	12.8422					-13.9239	11.596			-13.9239	6.20322
	-17.7076	9.43793			-17.7076	12.6036					-13.8357	12.795			-13.8357	5.95534
	-17.9353	8.15627			-17.9353	13.0543					-13.9755	14.0464			-13.9755	5.69956
	-18.1886	6.87047			-18.1886	13.5188					-14.8347	14.6284			-14.8347	5.61255
	-17.9788	5.58125			-17.9788	13.9869					-13.0517	14.7099			-13.0517	5.64741
	-17.0332	5.00428			-17.0332	14.0275					-11.3505	14.7923			-11.3505	5.68213
	-14.4618	4.93158			-14.4618	13.7677					-11.2687	14.9597			-11.2687	5.73329
	-15.9031	4.85626			-15.9031	13.5015					-12.5044	15.458			-12.5044	5.85088
	-16.1979	4.69592			-16.1979	13.3197					-12.9654	15.9711			-12.9654	5.97227
	-16.0236	4.21594			-16.0236	13.4677					-14.691	16.4879			-14.691	6.09487
	-15.2962	3.72831			-15.2962	13.6193					-14.2869	16.2571			-14.2869	6.13569
	-15.6054	3.24374			-15.6054	13.7713					-11.984	15.8592			-11.984	6.16007
	-15.0267	3.45933			-15.0267	13.846					-15.3963	15.4649			-15.3963	6.18436
	-15.5724	3.83525			-15.5724	13.9066					-14.9174	15.0621			-14.9174	6.14329
	-16.2618	4.21291			-16.2618	13.9671					-13.8824	14.6235			-13.8824	6.01423
	-16.0346	4.60423			-16.0346	13.8649					-15.3455	14.1887			-15.3455	5.8839
	-16.4695	5.03679			-16.4695	13.5463					-15.4075	13.7701			-15.4075	5.7645
	-17.2103	5.47253			-17.2103	13.2282					-15.137	13.3832			-15.137	5.82243
	-17.3236	5.88189			-17.3236	12.9401					-14.1126	12.9902			-14.1126	5.88012
	-18.6665	5.92331			-18.6665	13.0795					-13.8729	12.6008			-13.8729	5.9362
	-18.1579	5.96821			-18.1579	13.219					-16	12.3997			-16	6.31911
	-18.368	6.01558			-18.368	13.3554					-15.7324	12.2931			-15.7324	6.85548
	-18.6218	5.9459			-18.6218	12.836					-16.0361	12.1828			-16.0361	7.36949
	-15.7723	5.81515			-15.7723	11.9711					-13.1403	12.593			-13.1403	7.75113
	-16.8377	5.6862			-16.8377	11.1051					-15.5401	14.2667			-15.5401	7.80186
	-13.0278	5.70436			-13.0278	10.3603					-15.6532	15.8684			-15.6532	7.8511
	-13.5563	6.12707			-13.5563	10.0066					-15.4074	17.4736			-15.4074	7.90124
	-13.0088	6.59647			-13.0088	9.66147					-15.4469	17.5532			-15.4469	8.54783
	-12.9635	7.13736			-12.9635	9.30809					-13.6597	17.4614			-13.6597	9.23969
	-12.6614	6.58677			-12.6614	9.62483					-15.1441	17.3326			-15.1441	9.952
	-12.6911	5.93848			-12.6911	10.008					-16.0167	17.3325			-16.0167	10.9447
	-13.254	5.26959			-13.254	10.4132					-17.558	17.4576			-17.558	12.15
	-15.6848	5.59118			-15.6848	10.8175					-17.848	17.58			-17.848	13.3807
	-16.1568	6.74093			-16.1568	11.217					-16.4011	17.8169			-16.4011	14.5586
	-16.0272	7.9183			-16.0272	11.6412					-22.0721	18.6556			-22.0721	15.4547
	-12.3469	8.9086			-12.3469	11.9249					-21.438	19.5179			-21.438	16.3912
	-13.2825	8.91637			-13.2825	11.4199					-20.2696	20.3782			-20.2696	17.3404
	-13.1043	8.93094			-13.1043	10.9148					-21.884	19.5718			-21.884	17.8286
	-12.6641	8.95231			-12.6641	10.4252					-23.6621	18.3917			-23.6621	18.1777
	-12.0329	10.1912			-12.0329	10.2533					-23.828	17.2414			-23.828	18.5367
	-11.1703	11.7438			-11.1703	10.1685					-24.1088	17.1546			-24.1088	18.7843
	-10.7425	13.3621			-10.7425	10.0807					-24.0644	18.5165			-24.0644	18.866
	-11.5344	13.8458			-11.5344	10.3248					-24.8195	19.9315			-24.8195	18.9463
	-10.7639	12.7181			-10.7639	11.0358					-25.4624	21.2867			-25.4624	19.0069
	-11.9092	11.6063			-11.9092	11.7672					-21.5027	20.0532			-21.5027	18.5161
	-11.8034	10.5955			-11.8034	12.48					-23.3635	18.8152			-23.3635	18.0139
	-12.3397	11.5593			-12.3397	12.4839					-23.657	17.6046			-23.657	17.512
	-14.1718	12.5842			-14.1718	12.4895					-26.9141	15.8107			-26.9141	23.648
	-14.2971	13.6463			-14.2971	12.4967					-26.0855	14.7128			-26.0855	23.5318
	-13.402	13.1061			-13.402	8.76395					-26.6586	13.5616			-26.6586	23.4128
	-13.1839	12.8433			-13.1839	8.97007					-27.9002	12.3872			-27.9002	23.2939
	-12.4757	12.6107			-12.4757	9.18192					-28.4624	13.4991			-28.4624	23.3046
	-12.364	12.4155			-12.364	9.39403					-24.905	14.7503			-24.905	23.3162
	-11.6558	10.6705			-11.6558	8.92732					-24.3457	16.0696			-24.3457	23.3262
	-10.9754	8.87644			-10.9754	8.43675					-23.5505	16.6585			-23.5505	23.2637
	-9.77268	7.10723			-9.77268	7.9466					-23.7402	16.7465			-23.7402	23.148
	-9.38088	6.71881			-9.38088	7.43582					-24.5293	16.8375			-24.5293	23.0297
	-8.23037	7.23904			-8.23037	6.89085					-24.1999	16.9099			-24.1999	22.997
	-9.06656	7.75767			-9.06656	6.34711					-22.8413	16.9099			-22.8413	23.2884
	-9.032	8.15684			-9.032	5.71231					-22.8888	16.9099			-22.8888	23.5717
	-8.45393	8.15683			-8.45393	4.65371					-23.0192	16.9098			-23.0192	23.8471
	-8.08485	8.15683			-8.08485	3.59229					-23.3157	15.596			-23.3157	24.2496
	-8.17356	8.15684			-8.17356	2.52823					-24.0014	14.0629			-24.0014	24.6886
	-8.37619	9.49688			-8.37619	2.27184					-25.2408	12.5927			-25.2408	25.129
	-7.58998	11.1613			-7.58998	2.15536					-25.4324	11.2663			-25.4324	25.2391
	-5.09321	12.874			-5.09321	2.0408					-24.1129	9.99354			-24.1129	24.9655
	-5.78464	14.1654			-5.78464	1.82276					-24.1675	8.73566			-24.1675	24.6915
	-6.63267	15.0144			-6.63267	1.47277					-26.0585	7.60739			-26.0585	24.4031
	-6.54107	15.9053			-6.54107	1.12568					-27.9008	7.60738			-27.9008	23.8676
	-6.60395	16.7507			-6.60395	0.854285					-24.1635	7.60739			-24.1635	23.3305
	-6.71764	16.7507			-6.71764	1.41598					-24.0337	7.60738			-24.0337	22.8057
	-8.47692	16.7507			-8.47692	1.97399					-25.5989	21.653			-25.5989	25.1906
	-6.53761	16.7507			-6.53761	2.51411					-26.7355	21.4273			-26.7355	25.6288
	-5.33624	2.86057			-5.33624	-3.13566					-27.4314	21.1964			-27.4314	26.0764
	-5.4214	2.75024			-5.4214	-2.48927					-25.9083	21.6609			-25.9083	26.4766
	-3.46705	2.63326			-3.46705	-1.82055					-24.7528	22.662			-24.7528	26.8317
	-1.89188	1.98431			-1.89188	-1.86212					-25.1803	23.7099			-25.1803	27.1951
	-1.62365	0.956616			-1.62365	-2.44784					-28.1547	24.5806			-28.1547	27.182
	0.99942	-0.0841795			0.99942	-3.04764					-25.7583	24.5755			-25.7583	25.5378
	0.0802703	-0.958061			0.0802703	-3.26919					-27.1951	24.5639			-27.1951	23.8393
	0.916045	-1.14053			0.916045	-1.879					-26.9325	24.5456			-26.9325	22.1273
	1.20579	-1.3317			1.20579	-0.495768					-26.2955	24.1212			-26.2955	21.7683
	2.38426	-1.52701			2.38426	0.849029					-26.4063	23.5867			-26.4063	21.7286
	4.45533	-1.48974			4.45533	0.458014					-25.7742	23.0535			-25.7742	21.6845
	3.13605	-1.39095			3.13605	-0.362076					-25.9863	22.0596			-25.9863	21.6206
	4.70817	-1.28912			4.70817	-1.17862					-28.2496	20.4026			-28.2496	21.5232
	4.97541	-0.558214			4.97541	-1.24884					-27.8327	18.799			-27.8327	21.4163
	4.95668	1.11284			4.95668	-0.278883					-27.1159	17.3833			-27.1159	21.2999
	4.29624	2.81451			4.29624	0.68428					-27.9975	19.0873			-27.9975	21.086
	3.8439	4.41847			3.8439	1.58333					-28.2662	20.8025			-28.2662	20.8719
	5.45168	3.25379			5.45168	1.38068					-27.6317	22.4826			-27.6317	20.6631
	6.1561	2.13644			6.1561	1.17914					-26.777	24.4257			-26.777	20.8409
	3.10729	1.09168			3.10729	0.983904					-27.8542	26.5688			-27.8542	21.2313
	1.98926	-0.70918			1.98926	0.951561					-26.9079	28.7431			-26.9079	21.6126
	2.94979	-2.89017			2.94979	1.01156					-27.9675	30.0816			-27.9675	22.1346
	3.54093	-4.97641			3.54093	1.07277					-29.3795	28.8434			-29.3795	22.9922
	4.05254	-6.36215			4.05254	0.750783					-29.8974	27.5974			-29.8974	23.8385
	6.85626	-5.81181			6.85626	-0.607342					-29.0818	26.373			-29.0818	24.6538
	6.31406	-5.24927			6.31406	-1.97917					-30.0583	26.692			-30.0583	25.016
	5.87737	-4.68706			5.87737	-3.33157					-29.7105	27.1976			-29.7105	25.3183
	8.8718	-5.07345			8.8718	-4.19599					-28.1058	27.6924			-28.1058	25.6083
	9.37275	-5.57454			9.37275	-5.00299					-28.0005	27.6618			-28.0005	25.8334
	8.36481	-6.06446			8.36481	-5.79549					-29.2513	27.1291			-29.2513	25.9948
	8.9332	-6.2447			8.9332	-6.32244					-29.4612	26.6079			-29.4612	26.1519
	11.2542	-6.12079			11.2542	-6.58137					-29.0088	26.1984			-29.0088	26.283
	13.2442	-5.99464			13.2442	-6.83467					-29.104	26.5679			-29.104	26.2331
	13.9194	-6.07945			13.9194	-7.11796					-29.2431	26.9497			-29.2431	26.1826
	13.5967	-7.50669			13.5967	-7.54386					-30.0259	27.3617			-30.0259	26.129
	11.2531	-8.91229			11.2531	-7.96021					-29.7189	26.892			-29.7189	25.92
	13.1044	-10.3651			13.1044	-8.38731					-29.2548	26.1528			-29.2548	25.6693
	11.8432	-10.8483			11.8432	-8.46906					-28.7607	25.3866			-28.7607	25.4137
	12.1651	-11.0134			12.1651	-8.44369					-28.637	24.1912			-28.637	24.9053
	11.6736	-11.1684			11.6736	-8.41675					-28.2693	22.3505			-28.2693	24.0136
	12.021	-11.1939			12.021	-8.46969					-28.2732	20.4558			-28.2732	23.1062
	11.9654	-10.9964			11.9654	-8.64033					-23.7245	18.5465			-23.7245	22.2033
	13.8102	-10.74			13.8102	-8.80443					-24.7079	16.363			-24.7079	21.3178
	11.3859	-10.4291			11.3859	-8.9594					-23.6015	14.1218			-23.6015	20.4166
	10.3055	-9.93189			10.3055	-9.21535					-22.8924	11.8778			-22.8924	19.5218
	12.5252	-9.36042			12.5252	-9.46453					-20.9157	11.8974			-20.9157	18.7705
	12.4183	-8.72777			12.4183	-9.70085					-22.6296	13.2912			-22.6296	18.0724
	13.3377	-8.91294			13.3377	-10.1821					-19.235	14.6927			-19.235	17.3745
	11.2328	-9.60736			11.2328	-10.8435					-22.5986	16.1461			-22.5986	16.5516
	14.1458	-10.2809			14.1458	-11.5139					-20.314	17.9082			-20.314	15.2067
	12.434	-10.9403			12.434	-11.8328					-17.2355	19.6406			-17.2355	13.8394
	14.2265	-11.6764			14.2265	-11.0881					-18.4798	21.3029			-18.4798	12.4873
	13.1492	-12.3862			13.1492	-10.4307					-15.9336	22.9601			-15.9336	11.3615
	15.188	-13.0572			15.188	-9.8724					-13.9046	24.6411			-13.9046	10.2795
	13.9041	-14.7187			13.9041	-10.4004					-11.1029	26.3101			-11.1029	9.22005
	15.0773	-16.5516			15.0773	-11.0994					-9.20591	25.6935			-9.20591	8.1871
	16.0952	-18.3431			16.0952	-11.7686					-12.2331	22.4653			-12.2331	7.23217
	13.479	-19.2586			13.479	-12.0649					-8.11201	19.3039			-8.11201	6.32342
	16.0418	-19.0677			16.0418	-11.9277					-7.48665	16.2305			-7.48665	5.44182
	15.7206	-18.7836			15.7206	-11.7775					-7.49754	14.7457			-7.49754	4.80712
	17.7277	-18.4731			17.7277	-11.6684					-5.32798	13.2839			-5.32798	4.19809
	19.4446	-18.7684			19.4446	-12.116					-4.42277	11.7835			-4.42277	3.58876
	19.3832	-19.0341			19.3832	-12.5503					-4.45058	9.8884			-4.45058	3.2124
	19.9188	-19.2831			19.9188	-12.9905					-3.40658	7.8855			-3.40658	2.92853
	20.0279	-18.6255			20.0279	-13.6054					-3.18236	5.8363			-3.18236	2.63619
	18.4037	-17.6139			18.4037	-14.2767					-3.12292	4.83451			-3.12292	2.37632
	21.5616	-16.5436			21.5616	-14.967					-2.63891	5.84097			-2.63891	2.18856
	19.6917	-16.135			19.6917	-15.2857					-0.483025	6.83511			-0.483025	2.01334
	19.5118	-17.0458			19.5118	-14.8864					-1.10996	7.85898			-1.10996	1.84327
	17.4114	-17.9314			17.4114	-14.4931					-1.78439	7.77609			-1.78439	1.90258
	19.5389	-18.83			19.5389	-14.0893					-2.15476	7.6429			-2.15476	1.96668
	18.195	-19.5381			18.195	-14.6622					-3.72447	7.49066			-3.72447	2.03081
	18.5014	-20.22			18.5014	-15.2685					-4.04215	5.79439			-4.04215	2.03112
	19.1653	-20.9194			19.1653	-15.9075					-1.62416	3.09441			-1.62416	1.9882
	19.6368	-20.7351			19.6368	-16.4356					-1.72033	0.316589			-1.72033	1.94286
	17.9466	-19.9123			17.9466	-16.8682					-1.27126	-1.48225			-1.27126	1.9082
	20.5984	-19.0085			20.5984	-17.3124					-0.0350868	0.371762			-0.0350868	1.91601
	22.8292	-18.8073			22.8292	-17.7734					-1.32605	2.31778			-1.32605	1.92136
	23.1664	-21.3379			23.1664	-18.2805					-0.897962	4.30135			-0.897962	1.92404
	25.3581	-23.9077			25.3581	-18.8044					-0.147812	2.34369			-0.147812	1.20043
	25.6232	-26.4555			25.6232	-19.3317					0.88115	-0.493553			0.88115	0.289346
	27.4843	-25.884			27.4843	-20.6685					-0.757211	-3.3234			-0.757211	-0.637399
	27.0699	-24.6067			27.0699	-22.2114					-0.806055	-5.30053			-0.806055	-1.12989
	28.4643	-23.2823			28.4643	-23.7526					-0.999356	-6.31112			-0.999356	-1.08487
	28.6847	-22.145			28.6847	-24.9699					-0.773084	-7.31598			-0.773084	-1.04016
	29.4676	-21.2249			29.4676	-25.8442					-1.44087	-8.1949			-1.44087	-0.997478
	29.3874	-20.2959			29.3874	-26.7171					-1.15948	-7.39548			-1.15948	-0.967635
	29.6043	-19.4435			29.6043	-27.4604					-0.581228	-6.59515			-0.581228	-0.938467
	30.124	-19.6857			30.124	-26.3209					0.0725041	-5.81142			0.0725041	-0.91084
	29.7737	-19.9249			29.7737	-25.179					-0.495485	-6.21384			-0.495485	-0.993389
	30.6508	-20.156			30.6508	-24.0597					2.42681	-7.18869			2.42681	-1.13395
	29.289	-19.8302			29.289	-22.8923					1.71996	-8.14119			1.71996	-1.27806
	29.028	-19.2302			29.028	-21.7136					-1.03208	-9.1177			-1.03208	-1.47487
	27.8323	-18.6347			27.8323	-20.5634					0.874277	-10.0707			0.874277	-1.77598
	29.2992	-17.4695			29.2992	-19.4664					-0.140508	-10.9498			-0.140508	-2.07379
	27.549	-15.0123			27.549	-18.549					-0.27716	-11.7941			-0.27716	-2.38287
	25.7836	-12.5995			25.7836	-17.6559					1.99004	-8.73651			1.99004	-2.62761
	25.2229	-10.1139			25.2229	-16.7434					1.27391	-5.4867			1.27391	-2.88011
	22.9568	-10.858			22.9568	-15.213					0.222983	-2.20599			0.222983	-3.16051
	24.5601	-11.727			24.5601	-13.6867					0.224222	-0.35301			0.224222	-3.43438
	20.8486	-12.4949			20.8486	-12.1369					2.00845	0.312881			2.00845	-3.69965
	18.2833	-12.3322			18.2833	-10.4305					1.42232	0.988136			1.42232	-3.9963
	18.7119	-11.4843			18.7119	-8.64432					1.02581	1.4639			1.02581	-4.40663
	17.336	-10.6081			17.336	-6.82234					0.931298	0.986601			0.931298	-5.24931
	15.3225	-9.69136			15.3225	-5.06944					0.667783	0.510252			0.667783	-6.10336
	13.6102	-8.62165			13.6102	-3.6382					1.45671	0.0470327			1.45671	-6.94779
	10.5694	-7.52388			10.5694	-2.16199					0.788778	-0.076091			0.788778	-7.09565
	11.2496	-6.4241			11.2496	-0.675316					2.2081	-0.108349			2.2081	-6.82697
	7.4169	-6.83662			7.4169	-0.571399					4.61869	-0.13599			4.61869	-6.28403
	9.13045	-7.71801			9.13045	-0.960354					3.17426	0.405434			3.17426	-6.02603
	8.18326	-8.64569			8.18326	-1.44372					3.54124	1.69015			3.54124	-6.51192
	6.0552	-8.79605			6.0552	-0.994942					3.0329	2.95539			3.0329	-7.03854
	5.05878	-7.78369			5.05878	0.740197					5.8436	4.15875			5.8436	-7.6048
	2.76306	-6.7158			2.76306	2.40213					5.30548	5.07504			5.30548	-8.67507
	2.77647	-5.67183			2.77647	3.9291					3.28557	6.00646			3.28557	-9.77951
	1.09063	-6.17891			1.09063	4.87003					3.14786	6.93039			3.14786	-10.8883
	2.89339	-6.68826			2.89339	5.74835					6.45151	5.58901			6.45151	-12.0131
	-0.609046	-7.18799			-0.609046	6.53861					5.90402	3.08606			5.90402	-13.119
	-1.45378	-5.34524			-1.45378	6.92552					4.23837	0.727279			4.23837	-14.1469
	-3.28996	-2.10821			-3.28996	7.17552					6.33026	-1.3403			6.33026	-14.9946
	-1.99149	1.21837			-1.99149	7.46815					10.7692	-3.14912			10.7692	-15.5209
	-4.36106	3.96598			-4.36106	8.09621					9.12828	-4.94798			9.12828	-15.9082
	-6.24448	5.14047			-6.24448	9.64567					8.79662	-6.69165			8.79662	-16.1511
	-7.98028	6.38016			-7.98028	11.2092					7.05456	-4.82522			7.05456	-16.6311
	-7.69009	7.65528			-7.69009	12.7395					7.14953	-2.39924			7.14953	-17.0518
	-8.47657	5.97856			-8.47657	14.4717					8.78004	0.0180172			8.78004	-17.3559
	-8.9429	3.98482			-8.9429	16.2474					8.34723	0.720359			8.34723	-17.4579
	-8.81443	2.14014			-8.81443	17.9926					7.43615	-0.281508			7.43615	-17.3889
	-9.66029	2.80979			-9.66029	19.2895					8.07903	-1.10695			8.07903	-17.2679
	-8.88364	5.95743			-8.88364	20.0764					7.10286	-1.91006			7.10286	-16.9941
	-10.2162	8.98878			-10.2162	20.8272					7.31806	-3.41268			7.31806	-15.992
	-11.7323	11.8889			-11.7323	21.4834					7.53212	-4.83575			7.53212	-14.9908
	-13.3379	13.5326			-13.3379	21.3847					7.55665	-6.24588			7.55665	-13.9451
	-12.0091	15.1918			-12.0091	21.2153					8.11161	-5.22628			8.11161	-13.2293
	-13.1991	16.9479			-13.1991	20.9672					8.06232	-3.42206			8.06232	-12.6539
	-15.8496	16.5389			-15.8496	21.4736					7.65876	-1.5735			7.65876	-12.0754
	-15.0419	15.4757			-15.0419	22.2453					7.35924	0.214712			7.35924	-11.5585
	-15.3978	14.4732			-15.3978	23.0453					7.46295	1.87852			7.46295	-11.1595
	-15.9138	13.4046			-15.9138	23.9943					4.14278	3.60326			4.14278	-10.7764
	-17.5718	12.1779			-17.5718	25.1633					3.69962	5.34557			3.69962	-10.4196
	-15.9378	10.9897			-15.9378	26.368					1.50847	4.39302			1.50847	-10.2842
	-16.318	9.86997			-16.318	27.5796					1.50458	3.42729			1.50458	-10.142
	-18.7995	11.1939			-18.7995	27.7214					-1.04172	2.49539			-1.04172	-9.99337
	-19.0074	12.5914			-19.0074	27.8514					1.1238	1.88149			1.1238	-10.3871
	-19.5945	14.0138			-19.5945	27.9777					1.26231	1.44183			1.26231	-11.1401
	-19.4951	14.9223			-19.4951	27.993					2.66159	1.00802			2.66159	-11.8709
	-20.5588	15.5191			-20.5588	27.9601					5.65286	0.411213			5.65286	-12.9402
	-21.3986	16.12			-21.3986	27.9548					6.92399	-0.847454			6.92399	-15.3793
	-20.3159	16.6338			-20.3159	28.4239					6.60323	-2.10522			6.60323	-17.7724
	-20.4623	16.8753			-20.4623	30.6117					8.57715	-3.3369			8.57715	-20.068
	-21.4119	17.1334			-21.4119	32.8809					18.8354	-11.7785			18.8354	-16.4935
	-20.4679	17.4023			-20.4679	35.1926					21.1022	-11.1273			21.1022	-15.5799
	-8.72733	6.53529			-8.72733	7.60458					17.6987	-10.4313			17.6987	-14.6434
	-8.57493	4.99753			-8.57493	7.84347					16.4536	-9.38766			16.4536	-13.5359
	-8.23367	3.43998			-8.23367	8.07519					17.2949	-7.05962			17.2949	-11.7568
	-8.12686	2.33663			-8.12686	8.23994					17.21	-4.68586			17.21	-9.92535
	-10.3164	3.07427			-10.3164	8.12054					15.2646	-2.325			15.2646	-8.08794
	-11.5744	3.84878			-11.5744	7.91006					14.2746	-1.76555			14.2746	-6.9211
	-10.8167	4.64695			-10.8167	7.61229					12.6073	-1.60532			12.6073	-5.86567
	-9.04645	5.08446			-9.04645	7.75115					13.0632	-1.44427			13.0632	-4.80647
	-10.8845	5.44151			-10.8845	7.98856					8.47635	-1.38886			8.47635	-3.7963
	-10.7873	5.78952			-10.7873	8.20291					8.91028	-1.44636			8.91028	-2.80235
	-10.719	6.65358			-10.719	8.76605					7.32189	-1.46348			7.32189	-1.81829
	-12.6624	8.26985			-12.6624	9.86744					7.95016	-1.48002			7.95016	-0.891926
	-12.9235	9.86699			-12.9235	10.9759					8.45351	-2.57086			8.45351	-0.647408
	-13.4424	11.4076			-13.4424	12.0212					6.78868	-3.63438			6.78868	-0.403436
	-13.2308	13.0243			-13.2308	11.8375					7.22769	-4.64534			7.22769	-0.165791
	-12.4164	14.6656			-12.4164	11.6522					6.81996	-4.57576			6.81996	-1.9136
	-13.1103	16.2933			-13.1103	11.4697					5.71489	-3.86907			5.71489	-4.7079
	-13.2409	15.1938			-13.2409	11.7301					5.71917	-3.09273			5.71917	-7.44026
	-14.1764	12.5973			-14.1764	12.1473					6.43356	-2.7195			6.43356	-10.0827
	-14.6585	10.0154			-14.6585	12.4638					5.01546	-3.6474			5.01546	-12.3181
	-14.5411	7.89467			-14.5411	12.7701					13.9172	-4.58012			13.9172	-14.5411
	-15.1269	7.2334			-15.1269	13.2397					15.5223	-5.51143			15.5223	-16.7381
	-15.2889	6.58543			-15.2889	13.71					16.896	-5.65095			16.896	-17.1147
	-14.3046	5.95402			-14.3046	14.1802					19.1898	-5.70277			19.1898	-17.2825
	-11.6225	6.12245			-11.6225	15.1331					19.5074	-5.7534			19.5074	-17.4379
	-12.1669	6.37789			-12.1669	16.1396					21.3906	-5.00148			21.3906	-17.7698
	-12.82	6.62789			-12.82	17.1269					23.1588	-3.44805			23.1588	-18.2657
	-12.172	5.39748			-12.172	17.7846					22.3778	-1.84249			22.3778	-18.7511
	-12.4414	2.85701			-12.4414	18.1097					27.7706	-0.6078			27.7706	-19.163
	-11.3562	0.422071			-11.3562	18.4085					28.8141	-2.0895			28.8141	-19.0734
	-11.1551	-1.28565			-11.1551	18.51					28.2902	-3.44948			28.2902	-18.9516
	-9.55265	1.23406			-9.55265	17.548					24.3878	-4.74949			24.3878	-18.7918
	-10.4466	3.72876			-10.4466	16.61					23.7768	-5.64266			23.7768	-18.1067
	-11.2879	6.32023			-11.2879	15.6517					22.8554	-6.43932			22.8554	-17.2904
	-12.8691	7.24805			-12.8691	15.4598					22.0184	-7.28928			22.0184	-16.4468
	-12.1054	7.6752			-12.1054	15.4738					23.6186	-7.45616			23.6186	-15.1209
	-9.27497	8.12685			-9.27497	15.4661					17.6152	-6.5679			17.6152	-13.1524
	-8.43587	8.20806			-8.43587	14.7022					18.043	-5.66144			18.043	-11.1958
	-10.5777	7.73077			-10.5777	12.7701					13.4798	-4.7655			13.4798	-9.32508
	-8.51862	7.25932			-8.51862	10.6652					13.5771	-4.21458			13.5771	-8.74764
	-8.68331	6.80269			-8.68331	8.45984					13.5139	-3.64595			13.5139	-8.16666
	-6.52932	6.13004			-6.52932	7.47599					13.8127	-3.07313			13.8127	-7.59635
	-6.32966	5.44712			-6.32966	6.45802					14.7167	-2.79196			14.7167	-7.51099
	-6.2836	4.77024			-6.2836	5.43002					14.7716	-2.67086			14.7716	-7.70636
	-6.31347	4.111			-6.31347	4.85911					16.2693	-2.54562			16.2693	-7.90309
	-5.24779	3.43468			-5.24779	4.54132					17.199	-2.58586			17.199	-8.20707
	-8.03863	2.75893			-8.03863	4.22423					15.8491	-3.15612			15.8491	-8.88145
	-7.52301	2.41991			-7.52301	4.20171					18.4868	-3.71994			18.4868	-9.56741
	-10.6122	3.10433			-10.6122	5.08198					17.5011	-4.26399			17.5011	-10.2477
	-10.0761	3.79503			-10.0761	5.93557					15.6941	-4.95391			15.6941	-10.0022
	-9.2623	4.47539			-9.2623	6.74263					16.8554	-5.66321			16.8554	-9.62527
	-11.6012	5.09158			-11.6012	5.73844					18.5481	-6.35378			18.5481	-9.28239
	-10.7113	5.70387			-10.7113	4.40242					18.9124	-7.08965			18.9124	-9.12188
	-9.19378	6.31331			-9.19378	3.06102					17.6776	-7.84325			17.6776	-9.14601
	-7.98998	7.26896			-7.98998	2.57484					18.1532	-8.56075			18.1532	-9.17286
	-8.25794	8.58109			-8.25794	3.0642					15.4984	-8.95976			15.4984	-9.17652
	-7.43413	9.88121			-7.43413	3.54095					18.5576	-6.54602			18.5576	-8.9524
	-9.63103	10.6257			-9.63103	3.89837					14.695	-3.95734			14.695	-8.73641
	-6.52027	6.36727			-6.52027	3.17324					13.9075	-1.07375			13.9075	-8.51665
	-8.04182	2.37251			-8.04182	2.46617					13.4134	-1.47569			13.4134	-8.4172
	-5.73492	-1.58319			-5.73492	1.7383					13.4355	-3.0939			13.4355	-8.35455
	-5.63935	-1.70003			-5.63935	1.36696					13.6395	-4.73671			13.6395	-8.27972
	-5.74243	-0.417266			-5.74243	1.1327					13.7807	-5.33521			13.7807	-8.2829
	-7.08787	0.945735			-7.08787	0.890342					16.3324	-3.98791			16.3324	-8.44932
	-6.58999	1.35887			-6.58999	0.669231					16.2002	-2.65376			16.2002	-8.61175
	-5.98339	-0.067243			-5.98339	0.490698					16.3931	-1.26892			16.3931	-8.7781
	-5.4621	-1.42925			-5.4621	0.316283					18.5158	-1.08036			18.5158	-9.20721
	-6.3821	-2.79518			-6.3821	0.137453					13.6462	-0.930213			13.6462	-9.63365
	-7.5138	-3.34243			-7.5138	0.180276					17.5276	-0.774148			17.5276	-10.0701
	-10.8968	-3.85206			-10.8968	0.230194					18.5667	-3.39568			18.5667	-10.403
	-8.07131	-4.37361			-8.07131	0.282874					18.5021	-7.53075			18.5021	-10.659
	-10.0996	-1.50874			-10.0996	0.382564					17.4075	-11.3462			17.4075	-10.9216
	-6.74613	3.81184			-6.74613	0.509558					16.8678	-13.9778			16.8678	-11.059
	-6.95969	9.62266			-6.95969	0.638339					17.6963	-13.8876			17.6963	-10.7487
	-10.9235	14.171			-10.9235	0.743517					17.6216	-13.775			17.6216	-10.4304
	-8.36821	12.9366			-8.36821	0.767912					18.3934	-13.642			18.3934	-10.1116
	-7.15637	11.6711			-7.15637	0.794494					18.1088	-13.0093			18.1088	-9.56567
	-7.58876	10.4053			-7.58876	0.822684					17.852	-12.2491			17.852	-8.95142
	-7.94462	9.29789			-7.94462	0.277767					16.5066	-11.4716			16.5066	-8.32554
	-5.1889	8.20921			-5.1889	-0.386761					17.7273	-9.92256			17.7273	-7.9049
	-3.93094	7.13432			-3.93094	-1.04365					17.2782	-7.19754			17.2782	-7.72014
	-1.94015	4.64227			-1.94015	-1.38706					12.0467	-4.267			12.0467	-7.52814
	-1.72977	0.372308			-1.72977	-1.37097					13.455	-1.53397			13.455	-7.3137
	-5.25477	-3.75252			-5.25477	-1.35587					12.5923	-3.57628			12.5923	-6.80041
	-2.54085	-7.28276			-2.54085	-1.39299					12.7008	-5.54122			12.7008	-6.28084
	-4.23575	-4.8017			-4.23575	-2.20701					11.8751	-7.37523			11.8751	-5.76879
	-3.91938	-2.2579			-3.91938	-3.01563					12.2865	-8.61418			12.2865	-5.70586
	-4.59315	0.284384			-4.59315	-3.79826					13.7072	-9.51134			13.7072	-5.86011
	-4.56885	2.85991			-4.56885	-3.89552					13.8451	-10.3108			13.8451	-6.01107
	-3.38608	5.37767			-3.38608	-3.66827					14.2185	-11.4402			14.2185	-6.21613
	-4.92016	7.81343			-4.92016	-3.4488					15.3638	-13.2641			15.3638	-6.53912
	-3.75303	10.8096			-3.75303	-3.07775					13.626	-14.7949			13.626	-6.86066
	-3.90737	15.0653			-3.90737	-2.3777					14.5192	-16.0898			14.5192	-7.19627
	-4.66911	19.3395			-4.66911	-1.70808					14.986	-16.2127			14.986	-7.26288
	-6.88548	23.8283			-6.88548	-1.03643					14.4436	-16.2538			14.4436	-7.30689
	-5.21397	24.2685			-5.21397	-1.04903					14.8868	-16.2957			14.8868	-7.35202
	-5.80338	24.381			-5.80338	-1.11362					13.5086	-14.6313			13.5086	-6.66433
	-5.22227	24.4964			-5.22227	-1.17972					13.283	-11.0315			13.283	-5.38964
	-5.7768	20.2904			-5.7768	-1.61912					14.7577	-6.63117			14.7577	-4.06211
	-5.69097	13.118			-5.69097	-2.32642					9.06063	-2.19338			9.06063	-2.86931
	-5.65727	6.30784			-5.65727	-3.02495					9.53793	-0.305682			9.53793	-2.41307
	-3.28117	0.859675			-3.28117	-3.54231					9.69041	1.64563			9.69041	-1.92511
	-3.97816	-0.314831			-3.97816	-3.3229					9.52781	3.61282			9.52781	-1.41728
	-3.98786	-1.46321			-3.98786	-3.1245					9.02688	1.89039			9.02688	-0.762191
	-3.17219	-2.55737			-3.17219	-2.95341					8.47339	-0.422829			8.47339	0.00313254
	-3.07216	1.71137			-3.07216	-1.59042					10.7515	-2.22897			10.7515	0.827529
	-2.89171	7.45577			-2.89171	0.112125					10.9753	-2.40587			10.9753	1.71459
	-4.44164	13.0869			-4.44164	1.78434					6.85584	-0.842543			6.85584	2.59835
	-4.31427	15.599			-4.31427	3.02499					4.98313	0.80131			4.98313	3.49653
	-6.71213	13.9555			-6.71213	3.67914					4.51178	2.56199			4.51178	4.36871
	-6.60198	12.34			-6.60198	4.35521					4.98423	6.20179			4.98423	4.77353
	-6.61771	10.7169			-6.61771	5.04179					3.81415	10.029			3.81415	5.17986
	-7.98163	7.5334			-7.98163	5.82342					3.32642	13.9317			3.32642	5.57847
	-10.9604	4.58051			-10.9604	6.62684					4.03535	13.6046			4.03535	5.44607
	-10.9292	1.91297			-10.9292	7.43464					3.04201	11.1407			3.04201	5.03145
	-13.0919	2.84471			-13.0919	8.109					5.43825	8.83772			5.43825	4.61748
	-10.8309	5.68943			-10.8309	8.74047					2.40226	6.92347			2.40226	4.2763
	-14.3192	8.62228			-14.3192	9.37099					1.8708	5.49548			1.8708	4.10046
	-14.3206	10.8482			-14.3206	9.72398					7.17099	4.06705			7.17099	3.92287
	-12.1452	11.1499			-12.1452	9.34914					7.07287	2.67284			7.07287	3.74786
	-15.5772	11.4821			-15.5772	8.9752					7.0696	3.0707			7.0696	3.64192
	-15.7944	11.8354			-15.7944	8.61104					5.62324	3.71888			5.62324	3.5454
	-15.473	11.189			-15.473	8.39271					4.43145	4.35994			4.43145	3.45069
	-16.9815	10.4134			-16.9815	8.19505					4.89351	3.46181			4.89351	3.24875
	-15.4401	9.66308			-15.4401	8.00235					6.78903	1.07934			6.78903	2.94466
	-14.9389	10.1649			-14.9389	7.98499					6.91706	-1.18927			6.91706	2.6478
	-14.0837	11.9941			-14.0837	8.14009					4.58953	-2.91989			4.58953	2.28872
	-14.2151	13.8993			-14.2151	8.28746					7.30465	-1.03035			7.30465	1.55992
	-12.1609	15.4445			-12.1609	8.3941					6.38606	0.858024			6.38606	0.851521
	-13.5515	13.5188			-13.5515	8.22124					8.45519	2.83112			8.45519	0.129162
	-13.8108	11.7353			-13.8108	8.04165					7.16677	1.43834			7.16677	-0.297564
	-12.1356	10.0042			-12.1356	7.84659					6.79342	-0.963306			6.79342	-0.623294
	-12.8774	11.1315			-12.8774	8.23773					6.01926	-3.33566			6.01926	-0.960885
	-14.0655	13.2467			-14.0655	8.80572					5.42524	-4.56567			5.42524	-1.35503
	-15.2252	15.5281			-15.2252	9.37687					5.18664	-4.02275			5.18664	-1.82963
	-13.6139	17.5178			-13.6139	9.80321					5.85493	-3.46683			5.85493	-2.3154
	-16.432	18.834			-16.432	9.99677					4.05438	-2.91008			4.05438	-2.80174
	-16.3772	20.1805			-16.3772	10.1928					6.49266	-3.34541			6.49266	-4.02261
	-16.477	21.528			-16.477	10.3869					7.29762	-3.78046			7.29762	-5.29074
	-18.5238	20.6527			-18.5238	11.7062					6.92021	-4.1993			6.92021	-6.56725
	-20.9164	19.7266			-20.9164	13.0547					6.59442	-4.46449			6.59442	-7.1378
	-20.1016	18.7813			-20.1016	14.39					7.0841	-4.64359			7.0841	-7.27962
	-19.7906	18.8455			-19.7906	15.0596					7.39596	-4.81457			7.39596	-7.42259
	-19.6689	19.565			-19.6689	15.3381					9.15835	-5.07824			9.15835	-7.63578
	-21.8605	20.287			-21.8605	15.6165					9.1268	-5.68935			9.1268	-8.12513
	-22.6666	21.2761			-22.6666	16.0472					8.43635	-6.23973			8.43635	-8.62474
	-22.4936	23.3322			-22.4936	17.0626					8.54124	-6.71703			8.54124	-9.12235
	-24.6785	25.4055			-24.6785	18.0709					8.12502	-7.19604			8.12502	-9.50267
	-22.2739	27.4445			-22.2739	19.0483					8.17222	-7.68112			8.17222	-9.86772
	-22.5498	27.8231			-22.5498	18.507					7.97103	-8.16734			7.97103	-10.2442
	-22.5023	27.877			-22.5023	17.675					7.5916	-8.47032			7.5916	-10.447
	-22.7781	27.9355			-22.7781	16.8473					7.5263	-8.59128			7.5263	-10.4577
	-25.4972	28.0611			-25.4972	16.4131					5.89364	-8.72171			5.89364	-10.4684
	-26.0098	28.2607			-26.0098	16.3904					5.75287	-8.75552			5.75287	-10.5364
	-25.646	28.4561			-25.646	16.3677					5.56369	-7.67609			5.56369	-11.2277
	-25.3444	28.4723			-25.3444	16.4193					5.29852	-6.55962			5.29852	-11.9297
	-26.7044	26.7005			-26.7044	17.2509					4.08198	-5.43745			4.08198	-12.6251
	-27.4534	24.9895			-27.4534	18.0648					4.00268	-4.96678			4.00268	-13.0493
	-29.527	23.3768			-29.527	18.842					7.94072	-4.7785			7.94072	-13.3465
	-29.5682	22.1404			-29.5682	19.1465					7.86397	-4.58438			7.86397	-13.6318
	-28.5576	21.0488			-28.5576	19.255					9.24131	-4.03284			9.24131	-14.1676
	-29.4569	19.9663			-29.4569	19.3652					10.3551	-2.70636			10.3551	-15.2069
	-30.0959	18.3034			-30.0959	19.781					10.7745	-1.28851			10.7745	-16.2313
	-30.459	15.5878			-30.459	20.7967					10.5949	0.275682			10.5949	-17.2845
	-30.271	12.9841			-30.271	21.7885					10.2906	-3.26775			10.2906	-17.8337
	-30.3858	10.3833			-30.3858	22.7988					14.3207	-6.53076			14.3207	-18.3386
	-30.5018	15.18			-30.5018	22.9162					14.3953	-9.36851			14.3953	-18.8506
	-28.8889	20.5607			-28.8889	22.9996					13.0414	-11.2365			13.0414	-19.2178
	-28.9379	26.4727			-28.9379	23.0967					14.949	-12.689			14.949	-19.4766
	-30.8867	29.2666			-30.8867	23.1963					13.8457	-14.2118			13.8457	-19.7416
	-28.5836	29.6452			-28.5836	23.2904					15.2348	-15.42			15.2348	-20.0372
	-30.1502	30.1093			-30.1502	23.3884					15.227	-15.2368			15.227	-20.4447
	-28.3013	30.4027			-28.3013	23.5038					15.7946	-15.0419			15.7946	-20.863
	-28.3049	29.7331			-28.3049	23.6791					13.6434	-14.8401			13.6434	-21.2813
	-29.3184	29.0486			-29.3184	23.8594					13.8255	-14.0415			13.8255	-21.5015
	-30.0992	28.3669			-30.0992	24.04					14.636	-12.9371			14.636	-21.6849
	-30.1579	25.5508			-30.1579	24.3563					14.3689	-11.6751			14.3689	-21.8701
	-30.6988	22.2232			-30.6988	24.7114					11.9055	2.98443			11.9055	-19.1578
	-30.4937	18.966			-30.4937	25.0651					8.93785	5.27469			8.93785	-18.6419
	-27.9784	5.62628			-27.9784	22.1727					8.65724	7.55126			8.65724	-18.1138
	-27.5526	3.73605			-27.5526	20.7738					8.49646	9.01978			8.49646	-17.5706
	-27.7477	1.98331			-27.7477	19.4195					8.99784	8.29774			8.99784	-17.0651
	-28.2637	0.920029			-28.2637	18.5076					9.16547	7.59731			9.16547	-16.5669
	-27.9304	1.46596			-27.9304	18.7419					9.06717	6.88447			9.06717	-16.0519
	-25.5571	2.00721			-25.5571	18.9819					9.05452	6.67424			9.05452	-15.8735
	-25.5749	2.57024			-25.5749	19.2391					8.6903	6.51351			8.6903	-15.7279
	-25.4593	2.78407			-25.4593	18.7704					8.34644	6.35746			8.34644	-15.5855
	-26.5579	2.9636			-26.5579	18.2305					6.8904	6.28263			6.8904	-15.3807
	-26.3117	3.13891			-26.3117	17.7051					6.69123	6.28264			6.69123	-15.127
	-24.7455	3.22331			-24.7455	17.1324					6.51114	6.28263			6.51114	-14.882
	-25.3004	3.22331			-25.3004	16.5314					5.05313	5.96542			5.05313	-14.6502
	-25.1432	3.22332			-25.1432	15.9453					4.84877	3.91419			4.84877	-14.5154
	-23.0429	3.48713			-23.0429	15.3915					6.46196	1.97139			6.46196	-14.3833
	-22.5857	5.26033			-22.5857	15.1069					7.11806	0.0343768			7.11806	-14.2464
	-23.1121	7.05691			-23.1121	14.8309					7.55096	-0.671409			7.55096	-14.3107
	-23.3617	8.9771			-23.3617	14.5484					6.79564	-1.01983			6.79564	-14.4299
	-23.5355	9.82106			-23.5355	14.507					6.71424	-1.37234			6.71424	-14.5514
	-23.6756	10.3304			-23.6756	14.535					7.99077	-1.60173			7.99077	-14.6242
	-25.0935	10.8552			-25.0935	14.5642					7.78766	-1.64971			7.78766	-14.6242
	-25.7049	11.2021			-25.7049	14.5821					7.51673	-1.69877			7.51673	-14.6242
	-24.7307	11.2752			-24.7307	14.5821					7.99582	-1.76752			7.99582	-14.6157
	-25.1458	11.3501			-25.1458	14.5821					8.55671	-2.78223			8.55671	-14.2027
	-24.7194	11.4491			-24.7194	14.5749					6.75292	-3.80836			6.75292	-13.7821
	-24.0838	12.7155			-24.0838	14.2156					7.85933	-4.82002			7.85933	-13.3641
	-23.1196	14.0385			-23.1196	13.8404					9.79183	-4.20921			9.79183	-12.8693
	-22.5002	15.3892			-22.5002	13.4578					11.888	-2.4606			11.888	-12.3204
	-21.4194	13.4223			-21.4194	12.8786					8.84363	-0.483826			8.84363	-11.7795
	-20.6523	9.54198			-20.6523	12.1521					9.91571	0.497284			9.91571	-11.3264
	-18.8462	5.74163			-18.8462	11.4021					9.3565	-2.00684			9.3565	-11.0719
	-18.2367	3.16365			-18.2367	10.6463					7.57356	-4.55184			7.57356	-10.8182
	-15.1867	3.8706			-15.1867	9.86239					10.66	-7.06911			10.66	-10.5712
	-16.6396	4.69691			-16.6396	9.07912					10.9572	-6.59868			10.9572	-10.2243
	-14.9018	5.62234			-14.9018	8.3151					11.363	-5.5988			11.363	-9.86792
	-15.1663	3.76402			-15.1663	7.66004					10.3878	-4.56629			10.3878	-9.5258
	-12.7652	1.48849			-12.7652	7.01875					10.9776	-4.30902			10.9776	-9.27011
	-14.3896	-0.703736			-14.3896	6.38816					11.0176	-4.94589			11.0176	-9.11165
	-11.0415	-1.58077			-11.0415	5.84739					10.5191	-5.56343			10.5191	-8.95854
	-10.3486	-1.0201			-10.3486	5.42281					10.449	-6.17543			10.449	-8.81987
	-9.19003	-0.468501			-9.19003	5.0096					11.2458	-6.62282			11.2458	-8.83215
	-10.5801	-0.0155692			-10.5801	4.50919					12.2305	-7.05963			12.2305	-8.85774
	-6.98755	-0.540083			-6.98755	3.38658					12.2901	-7.50712			12.2901	-8.8977
	-8.33123	-1.05236			-8.33123	2.28621					14.2442	-7.10794			14.2442	-8.86523
	-4.91309	-1.57746			-4.91309	1.15458					13.3472	-6.38699			13.3472	-8.80954
	-5.25336	-2.97166			-5.25336	-0.105644					14.2525	-5.61533			14.2525	-8.75816
	-3.99386	-4.63493			-3.99386	-1.38071					14.4774	-5.45275			14.4774	-8.76131
	-2.2613	-6.32915			-2.2613	-2.68668					15.6645	-6.42492			15.6645	-8.85498
	-3.66682	-7.53428			-3.66682	-3.98267					14.3435	-7.41997			14.3435	-8.95291
	-2.37054	-7.85556			-2.37054	-5.23232					16.9873	-8.42001			16.9873	-9.05313
	1.2532	-8.17903			1.2532	-6.50619					15.7485	-6.50315			15.7485	-9.5267
	-2.23651	-8.49912			-2.23651	-7.78145					14.3275	-4.51922			14.3275	-10.004
	1.66583	-10.5801			1.66583	-8.92825					14.5614	-2.44566			14.5614	-10.4989
	1.47906	-12.6014			1.47906	-10.0435					15.4623	-3.05672			15.4623	-10.6775
	2.26384	-14.6225			2.26384	-11.1848					16.4944	-5.42653			16.4944	-10.6439
	1.48275	-14.8067			1.48275	-12.0717					15.7138	-7.84481			15.7138	-10.6108
	4.01792	-13.7638			4.01792	-12.7733					17.1942	-9.56287			17.1942	-11.0443
	4.07222	-12.6412			4.07222	-13.4907					17.5691	-8.86859			17.5691	-13.0845
	7.36601	-12.1138			7.36601	-14.5119					17.1541	-8.13025			17.1541	-15.2073
	4.32001	-13.803			4.32001	-16.5359					17.3277	-7.36432			17.3277	-17.3644
	5.05541	-15.5242			5.05541	-18.5722					17.5494	-6.80168			17.5494	-16.9063
	6.50866	-17.2398			6.50866	-20.5791					20.2045	-6.26133			20.2045	-15.9936
	6.93306	-17.9234			6.93306	-18.8167					21.0467	-5.71885			21.0467	-15.1358
	5.44641	-18.4332			5.44641	-16.33					20.9229	-4.15055			20.9229	-14.7227
	5.11773	-18.9401			5.11773	-13.8676					24.1652	-1.22737			24.1652	-14.7664
	5.03702	-20.3271			5.03702	-12.5884					24.9668	1.7419			24.9668	-14.8095
	3.35498	-22.8051			3.35498	-12.6351					25.8219	4.59772			25.8219	-14.8698
	5.76482	-25.2274			5.76482	-12.6825					24.8223	6.62881			24.8223	-15.2079
	5.44697	-27.4681			5.44697	-12.6402					26.5615	8.66042			26.5615	-15.5546
	4.57873	-28.7765			4.57873	-11.3326					26.5249	10.6432			26.5249	-15.9017
	4.94173	-30.0691			4.94173	-10.0299					27.3215	8.59515			27.3215	-15.9062
	4.93271	-31.3183			4.93271	-8.76327					23.0942	4.76255			23.0942	-15.7445
	0.240546	-28.9541			0.240546	-8.21303					23.9002	1.11134			23.9002	-15.5808
	-0.340529	-24.9213			-0.340529	-8.00438					24.9764	-1.84263			24.9764	-15.0958
	-0.752833	-20.9261			-0.752833	-7.80621					21.8754	-3.22986			21.8754	-13.9471
	-1.7139	-17.2307			-1.7139	-7.09622					22.8814	-4.51837			22.8814	-12.8662
	-1.70658	-14.573			-1.70658	-5.25015					20.4521	-5.76572			20.4521	-11.802
	-1.99276	-11.9635			-1.99276	-3.4395					20.4388	-4.39106			20.4388	-11.4394
	-3.10374	-9.27356			-3.10374	-1.57523					19.8292	-2.90501			19.8292	-11.1128
	-2.54366	-8.96229			-2.54366	-1.47275					19.9823	-1.43403			19.9823	-10.7599
	-4.32007	-8.79477			-4.32007	-1.52773					-0.509938	-4.38076			-0.509938	5.36148
	-4.36115	-8.59079			-4.36115	-1.61643					0.644195	-3.2291			0.644195	5.42634
	-10.9952	12.6299			-10.9952	8.11555					0.693716	-1.97666			0.693716	5.46817
	-10.305	9.64306			-10.305	6.70389					3.32448	-1.43362			3.32448	5.48267
	-9.35282	6.76612			-9.35282	5.32218					3.62148	-2.60028			3.62148	5.46975
	-6.58396	4.76394			-6.58396	3.99689					4.1517	-3.76758			4.1517	5.44764
	-5.0238	4.60605			-5.0238	2.86378					1.9617	-4.99837			1.9617	5.41535
	-6.87831	4.48068			-6.87831	1.76223					3.035	-3.08651			3.035	4.71027
	-5.29792	4.38156			-5.29792	0.631832					3.6384	-1.16984			3.6384	4.18516
	-3.59207	3.16963			-3.59207	-1.42482					2.46104	0.704526			2.46104	3.85284
	-4.29405	1.99906			-4.29405	-3.53164					3.14741	1.15903			3.14741	4.66695
	1.97049	0.847031			1.97049	-5.73587					4.11492	0.631805			4.11492	6.16557
	-2.09153	0.0879835			-2.09153	-6.8949					3.74982	0.0690151			3.74982	7.70465
	0.417336	-0.388505			0.417336	-7.26895					5.72606	-0.882318			5.72606	9.00973
	3.4309	-0.869163			3.4309	-7.64466					6.17025	-3.24323			6.17025	9.3513
	3.81589	-1.09874			3.81589	-8.36882					5.5376	-5.68532			5.5376	9.66817
	6.42313	-0.330224			6.42313	-10.4472					4.6547	-8.14672			4.6547	9.95292
	8.12196	0.551626			8.12196	-12.5895					6.73011	-11.0766			6.73011	10.0933
	7.49162	1.53215			7.49162	-14.7435					7.6491	-14.2447			7.6491	10.1398
	11.1384	2.37538			11.1384	-17.3097					8.02131	-17.4801			8.02131	10.1071
	12.313	3.35185			12.313	-20.1007					7.64459	-18.7387			7.64459	10.1014
	17.0516	4.51255			17.0516	-22.9718					9.75579	-17.3825			9.75579	10.2009
	19.4493	3.86773			19.4493	-25.092					10.3949	-15.935			10.3949	10.2863
	18.7992	0.713716			18.7992	-26.2897					8.65332	-14.5431			8.65332	10.1269
	22.1586	-2.36121			22.1586	-27.4977					10.4106	-15.1881			10.4106	5.5921
	24.6765	-5.22109			24.6765	-28.4545					10.2651	-15.8298			10.2651	1.125
	24.931	-6.48683			24.931	-24.8568					10.8094	-16.4519			10.8094	-3.13984
	25.3147	-7.75528			25.3147	-21.2119					11.1172	-16.6003			11.1172	-5.24764
	28.2879	-8.99365			28.2879	-17.5715					13.0167	-16.5082			13.0167	-6.26202
	29.547	-9.39765			29.547	-16.7565					13.6209	-16.4196			13.6209	-7.24894
	29.3879	-9.37112			29.3879	-17.4193					12.9241	-17.0274			12.9241	-8.11552
	28.9732	-9.3453			28.9732	-18.0544					13.1519	-19.3334			13.1519	-8.62397
	30.6188	-9.10347			30.6188	-18.284					13.5371	-21.5889			13.5371	-9.11177
	32.0825	-8.30198			32.0825	-17.506					14.4694	-23.9024			14.4694	-9.60255
	32.2099	-7.46298			32.2099	-16.7399					16.1202	-25.0769			16.1202	-9.55476
	32.7485	-6.5427			32.7485	-15.9482					16.6538	-26.1446			16.6538	-9.45998
	32.0077	-5.86224			32.0077	-15.3945					16.591	-27.1924			16.591	-9.36975
	32.9981	-5.18825			32.9981	-14.8664					16.2211	-26.5784			16.2211	-9.32802
	33.968	-4.50605			33.968	-14.3508					16.6245	-24.3939			16.6245	-9.32802
	34.1984	-6.42935			34.1984	-14.1079					16.5221	-22.1251			16.5221	-9.32802
	34.7913	-10.4956			34.7913	-14.1079					16.2691	-20.4554			16.2691	-9.40467
	34.1314	-14.3168			34.1314	-14.1079					16.7382	-22.8306			16.7382	-9.88881
	34.2622	-17.1587			34.2622	-14.1909					19.4302	-25.1097			19.4302	-10.3636
	36.8316	-14.9501			36.8316	-14.7134					17.844	-27.3988			17.844	-10.8521
	37.1046	-12.707			37.1046	-15.2221					19.2207	-27.4235			19.2207	-11.1281
	36.9225	-10.3103			36.9225	-15.7418					20.6784	-26.8358			20.6784	-11.3389
	38.7856	-9.53871			38.7856	-15.9759					20.0084	-26.2343			20.0084	-11.5529
	40.4278	-9.25024			40.4278	-16.1286					20.3417	-25.4927			20.3417	-11.5578
	38.7734	-8.96085			38.7734	-16.286					20.8762	-24.5233			20.8762	-11.269
	40.8802	-9.9469			40.8802	-15.9471					19.98	-23.4687			19.98	-10.9837
	38.5435	-12.7097			38.5435	-14.9093					19.9922	-22.3915			19.9922	-10.716
	36.7746	-15.4877			36.7746	-13.8627					20.8692	-22.4651			20.8692	-10.6989
	36.7853	-18.1336			36.7853	-12.8659					21.2141	-22.5406			21.2141	-10.6818
	38.5654	-17.9693			38.5654	-13.0392					21.6741	-22.6162			21.6741	-10.665
	37.7761	-17.801			37.7761	-13.2168					21.5664	-20.6367			21.5664	-10.2845
	38.3898	-17.6324			38.3898	-13.3949					21.5366	-17.3716			21.5366	-9.68118
	38.015	-19.6522			38.015	-15.1437					21.4421	-14.0634			21.4421	-9.07417
	38.2545	-22.8602			38.2545	-17.8386					24.394	-11.1304			24.394	-8.54802
	38.2134	-25.9322			38.2134	-20.5165					22.427	-9.07056			22.427	-8.11636
	40.543	-27.3997			40.543	-23.1739					24.8041	-6.98124			24.8041	-7.5202
	41.4454	-24.619			41.4454	-26.0513					21.1409	-4.91624			21.1409	-6.78351
	42.9848	-21.8781			42.9848	-28.8735					22.4743	-1.1962			22.4743	-5.50487
	45.9399	-19.2357			45.9399	-31.564					20.6294	2.84229			20.6294	-4.16352
	47.489	-21.9255			47.489	-32.1376					18.3187	6.85573			18.3187	-2.85647
	33.3523	-3.1702			33.3523	-13.3925					17.0312	7.17554			17.0312	-1.56041
	32.7079	-4.33192			32.7079	-11.7895					18.9171	3.59153			18.9171	-0.303763
	28.607	-5.42261			28.607	-10.2822					18.2322	0.132147			18.2322	0.925877
	23.961	-5.1743			23.961	-8.92554					18.3149	-2.94184			18.3149	2.07765
	19.8312	-3.47202			19.8312	-7.71978					18.0668	-2.74782			18.0668	2.38014
	18.8823	-1.81707			18.8823	-6.50308					16.8892	-2.55886			16.8892	2.67406
	15.7692	-0.254196			15.7692	-5.24721					17.0851	-2.36562			17.0851	2.9737
	11.3352	1.25409			11.3352	-3.40789					16.5034	-2.61939			16.5034	2.22129
	9.62113	2.74901			9.62113	-1.55193					14.658	-3.03502			14.658	1.15503
	8.6881	4.19461			8.6881	0.276126					16.7021	-3.47419			16.7021	0.107108
	6.69835	2.16375			6.69835	0.612813					16.0963	-4.76737			16.0963	-0.818881
	5.39869	-0.904423			5.39869	0.355976					16.1148	-7.51646			16.1148	-1.56566
	-0.231164	-3.57664			-0.231164	0.113562					16.8349	-10.3609			16.8349	-2.30515
	-2.38106	-3.15978			-2.38106	0.4825					15.1006	-13.2368			15.1006	-3.02019
	-4.0523	3.17867			-4.0523	2.04653					13.8237	-15.0236			13.8237	-3.3264
	-7.28411	9.84781			-7.28411	3.59861					12.0027	-16.7521			12.0027	-3.62214
	-7.38839	17.1997			-7.38839	5.21448					10.8774	-18.5216			10.8774	-3.92757
	-9.79309	19.1012			-9.79309	4.5488					12.0352	-20.0739			12.0352	-4.04568
	-9.53274	20.7419			-9.53274	3.87906					11.2738	-21.441			11.2738	-4.04417
	-10.9383	22.4154			-10.9383	3.25914					10.1126	-22.8353			10.1126	-4.04595
	-12.8581	17.197			-12.8581	4.75351					10.1801	-23.2598			10.1801	-4.00232
	-11.0374	8.17905			-11.0374	7.67423					12.6567	-20.4679			12.6567	-3.80223
	-12.6164	-0.0189997			-12.6164	10.7117					12.239	-17.4697			12.239	-3.59656
	-13.9201	-4.77327			-13.9201	13.2806					12.0033	-14.3636			12.0033	-3.39057
	-14.9105	0.159726			-14.9105	13.9451					12.1533	-11.3512			12.1533	-3.39911
	-14.5719	5.23266			-14.5719	14.6566					10.233	-8.2593			10.233	-3.45527
	-17.5209	10.3302			-17.5209	15.4001					13.5902	-5.15095			13.5902	-3.52142
	-17.583	10.8647			-17.583	16.3053					12.6023	-7.75626			12.6023	-3.58401
	-20.9026	10.4934			-20.9026	17.2771					15.0033	-16.9456			15.0033	-3.65005
	-20.2016	10.1413			-20.2016	18.2539					15.9074	-25.5721			15.9074	-3.73535
	-19.8132	11.077			-19.8132	19.3155					15.3613	-32.4591			15.3613	-3.81767
	-22.7626	13.7172			-22.7626	20.5411					16.8841	-30.725			16.8841	-3.64802
	-22.3609	16.4118			-22.3609	21.7691					17.102	-28.834			17.102	-3.47719
	-24.8295	18.8634			-24.8295	22.9786					15.8829	-26.8581			15.8829	-3.30926
	-25.101	17.6922			-25.101	24.4938					16.0458	-27.2654			16.0458	-3.09706
	-26.5597	16.6493			-26.5597	26.0211					17.1792	-28.7691			17.1792	-2.8698
	-29.1915	15.7484			-29.1915	27.5229					18.4784	-30.2318			18.4784	-2.65003
	-29.4697	16.339			-29.4697	27.9191					17.898	-30.9556			17.898	-2.448
	-30.9155	17.6292			-30.9155	27.7424					18.9512	-30.0525			18.9512	-2.29404
	-31.8569	18.8988			-31.8569	27.5429					17.984	-29.1676			17.984	-2.14894
	-31.7362	19.504			-31.7362	28.1009					15.4862	-28.2634			15.4862	-2.0064
	-34.4018	18.4109			-34.4018	30.4942					16.7693	-31.787			16.7693	-1.98263
	-35.8776	17.277			-35.8776	32.8015					16.4817	-35.284			16.4817	-1.97579
	-36.6431	16.0465			-36.6431	35.1343					16.0344	-38.6185			16.0344	-1.97849
	-27.1755	13.322			-27.1755	20.9792					14.8478	-39.9983			14.8478	-2.10024
	-26.3109	13.7464			-26.3109	20.599					15.4313	-40.0426			15.4313	-2.30185
	-26.0292	14.1901			-26.0292	20.2224					14.8631	-40.088			14.8631	-2.50661
	-25.8011	14.6803			-25.8011	19.8307					14.653	-39.8402			14.653	-2.67234
	-25.5943	14.4969			-25.5943	19.5854					12.9741	-38.2734			12.9741	-2.67457
	-25.5416	14.087			-25.5416	19.3862					11.2182	-36.5709			11.2182	-2.67702
	-23.8336	13.6667			-23.8336	19.17					11.5942	-34.7802			11.5942	-2.67965
	-23.5494	13.9292			-23.5494	18.9812					11.8433	-34.3788			11.8433	-3.01611
	-23.6083	15.3076			-23.6083	18.8599					12.4616	-34.2822			12.4616	-3.4457
	-23.5311	16.6988			-23.5311	18.7355					13.207	-34.1472			13.207	-3.87636
	-23.3211	18.0665			-23.3211	18.6112					12.4974	-33.6291			12.4974	-4.12458
	-22.6734	16.2963			-22.6734	18.8952					12.5372	-32.5774			12.5372	-4.13088
	-22.4889	14.5039			-22.4889	19.1897					12.8119	-31.5164			12.8119	-4.13742
	-21.5205	12.7561			-21.5205	19.4853					12.8901	-30.4699			12.8901	-4.12915
	-21.2941	12.0114			-21.2941	19.5997					13.6076	-29.8567			13.6076	-3.85112
	-21.2043	11.8875			-21.2043	19.5997					13.0333	-29.2192			13.0333	-3.56432
	-21.432	11.7684			-21.432	19.5997					14.7461	-28.5727			14.7461	-3.27556
	-21.666	11.8405			-21.666	19.585					15.213	-27.6142			15.213	-3.1608
	-22.6688	12.5004			-22.6688	19.5235					15.2492	-26.4667			15.2492	-3.131
	-25.2385	13.1771			-25.2385	19.4604					15.299	-25.3185			15.299	-3.103
	-26.6942	13.8546			-26.6942	19.3972					14.8354	-24.2378			14.8354	-3.12954
	-26.7718	14.3975			-26.7718	19.5505					14.4246	-23.2419			14.4246	-3.29401
	-24.884	14.9504			-24.884	19.7456					14.0825	-22.2436			14.0825	-3.45939
	-24.0545	15.5231			-24.0545	19.9408					12.6935	-21.2613			12.6935	-3.62268
	-24.0922	15.514			-24.0922	20.1511					12.0877	-20.9473			12.0877	-3.63374
	-24.0227	14.8336			-24.0227	20.388					12.1973	-20.6938			12.1973	-3.62734
	-23.9784	14.157			-23.9784	20.6254					12.5133	-20.43			12.5133	-3.62129
	-24.0797	13.4626			-24.0797	20.7442					12.2466	-19.9912			12.2466	-3.53678
	-23.7085	12.3761			-23.7085	19.5855					11.5834	-19.4037			11.5834	-3.38314
	-23.3762	11.3204			-23.3762	18.4219					12.5185	-18.8242			12.5185	-3.23773
	-23.2595	10.3196			-23.2595	17.2813					12.1183	-18.3103			12.1183	-3.28587
	-22.2847	10.7758			-22.2847	17.3319					13.6666	-18.3301			13.6666	-4.51138
	-22.1666	11.834			-22.1666	17.9018					14.1858	-18.3486			14.1858	-5.70613
	-22.3294	12.8449			-22.3294	18.4587					15.4462	-18.3667			15.4462	-6.92891
	-23.4658	13.6816			-23.4658	18.7384					14.9131	-21.1936			14.9131	-8.50522
	-19.4381	14.2137			-19.4381	18.4024					16.0991	-24.7377			16.0991	-10.0848
	-18.9761	14.8446			-18.9761	18.0735					19.233	-28.2764			19.233	-11.6271
	-18.945	15.6085			-18.945	17.7335					20.2402	-30.278			20.2402	-12.1295
	-21.4116	13.9364			-21.4116	17.3459					19.832	-29.9943			19.832	-11.0934
	-21.9114	12.3415			-21.9114	16.964					19.7968	-29.7016			19.7968	-10.0135
	-21.954	10.8898			-21.954	16.5717					21.8805	-29.4224			21.8805	-8.93862
	-22.0389	10.6899			-22.0389	16.56					25.3993	-31.0167			25.3993	-10.7516
	-21.2673	11.3925			-21.2673	16.8299					26.2422	-32.5815			26.2422	-12.6116
	-21.6594	12.2125			-21.6594	17.1062					28.5365	-34.0683			28.5365	-14.4741
	-21.2853	13.01			-21.2853	17.3563					35.1081	-27.8098			35.1081	-17.5656
	-21.9754	13.3024			-21.9754	17.4922					36.2722	-26.4621			36.2722	-17.6207
	-21.595	13.6343			-21.595	17.631					35.6649	-25.1504			35.6649	-17.7029
	-21.9821	13.9965			-21.9821	17.7692					38.8351	-23.9266			38.8351	-18.0344
	-19.525	13.0109			-19.525	17.2571					36.8992	-22.812			36.8992	-18.6048
	-19.9325	11.7219			-19.9325	16.5812					36.004	-21.6701			36.004	-19.1562
	-16.633	10.4769			-16.633	15.9065					36.2416	-20.6193			36.2416	-19.6987
	-17.4175	9.73225			-17.4175	15.2038					33.4065	-20.3395			33.4065	-20.4503
	-17.5428	9.58756			-17.5428	14.4275					33.0709	-20.036			33.0709	-21.1873
	-17.3875	9.45316			-17.3875	13.6573					32.7251	-19.7166			32.7251	-21.8923
	-16.3377	9.31769			-16.3377	12.9169					32.9858	-16.5657			32.9858	-22.8159
	-14.9919	8.84957			-14.9919	12.3353					34.0599	-12.281			34.0599	-23.8228
	-15.0222	8.38315			-15.0222	11.7547					31.6501	-8.07809			31.6501	-24.807
	-15.2863	7.91982			-15.2863	11.1762					30.6718	-6.97923			30.6718	-25.0036
	-15.1827	6.12369			-15.1827	10.8527					28.8713	-11.7459			28.8713	-23.659
	-15.2955	3.78469			-15.2955	10.6377					29.1945	-15.8694			29.1945	-22.3871
	-14.6271	1.64143			-14.6271	10.4202					28.3873	-19.4483			28.3873	-21.1275
	-14.3589	0.833078			-14.3589	10.1283					26.2835	-18.0567			26.2835	-22.591
	-13.3063	2.95938			-13.3063	9.62708					25.0725	-16.5308			25.0725	-24.1077
	-12.0229	5.25495			-12.0229	9.1204					23.1078	-14.967			23.1078	-25.6483
	-11.5142	7.65331			-11.5142	8.62351					24.1171	-11.4548			24.1171	-25.029
	-11.1149	7.36215			-11.1149	8.37049					20.851	-5.65144			20.851	-23.0473
	-10.0081	6.79391			-10.0081	8.14226					17.987	1.3609			17.987	-21.1591
	-10.2006	6.26961			-10.2006	7.91625					17.0955	7.02982			17.0955	-19.5048
	-11.6068	6.0685			-11.6068	7.88298					16.0865	5.08181			16.0865	-18.2537
	-11.2931	6.19442			-11.2931	8.03265					16.3049	3.38956			16.3049	-16.9837
	-11.3286	6.37061			-11.3286	8.17935					16.3364	2.03121			16.3364	-15.7234
	-11.5475	6.49116			-11.5475	8.31731					16.0382	2.71937			16.0382	-15.1071
	-12.5231	6.00867			-12.5231	8.38012					17.9464	3.75566			17.9464	-14.6172
	-12.9137	5.59542			-12.9137	8.44117					12.7935	4.72796			12.7935	-14.1452
	-11.6027	5.23005			-11.6027	8.50343					11.8275	4.50615			11.8275	-13.6297
	-11.0563	4.81597			-11.0563	8.79988					11.7298	2.90911			11.7298	-13.0158
	-11.2296	4.38542			-11.2296	9.10997					10.3739	1.43231			10.3739	-12.4065
	-9.17231	3.9457			-9.17231	9.37288					8.15996	0.296721			8.15996	-11.8221
	-8.61877	4.11593			-8.61877	9.33368					7.35753	2.30972			7.35753	-11.2806
	-8.639	5.21343			-8.639	8.8978					10.1366	4.28896			10.1366	-10.7806
	-7.3037	6.34692			-7.3037	8.44699					4.7804	6.17994			4.7804	-10.3334
	-9.17238	7.48184			-9.17238	7.99639					3.58644	7.17971			3.58644	-9.72331
	-8.95639	7.96904			-8.95639	7.88424					4.02684	7.66784			4.02684	-9.02082
	-9.27972	8.45986			-9.27972	7.76921					6.23691	8.05254			6.23691	-8.32828
	-9.05095	8.94832			-9.05095	7.65402					3.72583	8.2487			3.72583	-8.06466
	-7.91108	9.65615			-7.91108	7.85617					5.81608	8.17223			5.81608	-8.90731
	-8.83966	10.5269			-8.83966	8.25562					5.42752	8.10768			5.42752	-9.79158
	-9.22344	11.4002			-9.22344	8.65556					3.79723	8.05751			3.79723	-10.7603
	-8.37233	11.6509			-8.37233	9.13327					-4.9376	14.8142			-4.9376	6.69776
	-9.36651	10.025			-9.36651	9.90333					-6.93563	13.7469			-6.93563	7.03647
	-13.0374	8.48732			-13.0374	10.6743					-7.44863	12.6573			-7.44863	7.36527
	-11.1179	7.07173			-11.1179	11.4277					-7.12459	11.4931			-7.12459	7.70011
	-10.808	7.20702			-10.808	11.627					-7.55161	11.3678			-7.55161	8.15404
	-11.2546	7.59395			-11.2546	11.7325					-7.5775	11.6014			-7.5775	8.63767
	-14.2265	7.97166			-14.2265	11.8356					-7.40985	11.8427			-7.40985	9.13567
	-14.5992	8.02595			-14.5992	11.7814					-4.83753	11.7625			-4.83753	9.43688
	-10.9712	7.71962			-10.9712	11.5591					-4.75063	11.1691			-4.75063	9.39786
	-9.94029	7.41581			-9.94029	11.3454					-4.95745	10.5935			-4.95745	9.35762
	-10.1804	7.20117			-10.1804	11.1372					-5.49013	10.0492			-5.49013	9.31719
	-9.65079	7.7583			-9.65079	10.9088					-5.23144	11.2984			-5.23144	9.40925
	-9.8715	8.32896			-9.8715	10.6709					-5.3778	12.6633			-5.3778	9.5035
	-9.10815	8.89907			-9.10815	10.4294					-5.13149	14.1008			-5.13149	9.59681
	-9.01247	8.95452			-9.01247	10.2545					-4.65384	14.9892			-4.65384	9.63262
	-9.35847	8.81426			-9.35847	10.1093					-3.77017	15.4865			-3.77017	9.63262
	-9.60016	8.68552			-9.60016	9.96739					-3.08574	15.9926			-3.08574	9.63261
	-9.94415	7.91131			-9.94415	9.94823					-4.35677	16.291			-4.35677	9.62051
	-10.3686	5.99223			-10.3686	10.1631					-5.93979	15.935			-5.93979	9.57078
	-9.162	4.21133			-9.162	10.3735					-6.92475	15.5809			-6.92475	9.52114
	-9.51585	2.48751			-9.51585	10.5889					-6.03504	15.2375			-6.03504	9.47282
	-10.9554	4.17908			-10.9554	10.3468					-5.97306	14.5082			-5.97306	9.51705
	-11.678	5.92278			-11.678	10.098					-5.00029	13.6885			-5.00029	9.57786
	-11.0249	7.7079			-11.0249	9.84363					-4.73836	12.8667			-4.73836	9.63817
	-11.5729	7.9077			-11.5729	10.5255					-4.88401	12.7933			-4.88401	9.66709
	-10.8783	6.994			-10.8783	11.677					-4.695	13.5546			-4.695	9.66188
	-10.4183	5.98143			-10.4183	12.6887					-4.51212	14.3037			-4.51212	9.65624
	-10.9687	5.01623			-10.9687	13.3045					-4.62811	15.0745			-4.62811	9.70153
	-10.6886	4.45251			-10.6886	13.0523					-5.67587	16.4423			-5.67587	10.3204
	-10.3491	3.82285			-10.3491	12.7927					-6.36494	17.8338			-6.36494	10.9308
	-8.53084	3.14205			-8.53084	12.5322					-6.50755	19.2141			-6.50755	11.5186
	-7.86414	0.671407			-7.86414	11.6645					-7.00323	19.3174			-7.00323	11.8297
	-8.24114	-2.10152			-8.24114	10.6511					-6.68312	18.8834			-6.68312	12.0166
	-8.98663	-4.75147			-8.98663	9.63683					-8.79935	18.4866			-8.79935	12.1948
	-6.81065	-5.83507			-6.81065	9.21284					-9.22113	17.5972			-9.22113	12.4832
	-6.2208	-5.14637			-6.2208	9.49641					-6.71201	15.6304			-6.71201	12.9996
	-6.10227	-4.44802			-6.10227	9.78021					-6.71921	13.6943			-6.71921	13.5008
	-4.89496	-3.73194			-4.89496	10.0317					-6.53084	11.6892			-6.53084	14.0143
	-6.86684	-2.60576			-6.86684	9.88245					-9.4376	13.985			-9.4376	14.1577
	-8.9612	-1.4852			-8.9612	9.73268					-9.12834	16.4937			-9.12834	14.2757
	-7.25292	-0.39467			-7.25292	9.58566					-9.12633	19.0798			-9.12633	14.395
	-5.93129	-0.188791			-5.93129	9.41445					-9.2234	19.1538			-9.2234	14.3069
	-6.04733	-0.397172			-6.04733	9.23324					-9.19025	17.3198			-9.19025	14.0686
	-5.77534	-0.596867			-5.77534	9.05598					-8.57059	15.3807			-8.57059	13.8243
	-6.46483	-0.825942			-6.46483	8.97168					-9.1554	13.9572			-9.1554	13.6086
	-6.77888	-1.11786			-6.77888	9.10544					-8.27904	14.8849			-8.27904	13.5167
	-6.44974	-1.40283			-6.44974	9.23668					-9.01722	15.783			-9.01722	13.4223
	-7.38613	-1.69304			-7.38613	9.37094					-7.65204	16.6267			-7.65204	13.3277
	-7.5259	0.0645938			-7.5259	9.2426					-6.96797	15.7793			-6.96797	13.1359
	-8.76012	2.00716			-8.76012	9.09735					-9.98317	14.4772			-9.98317	12.9115
	-6.3872	4.08893			-6.3872	8.94742					-8.26548	13.1267			-8.26548	12.6813
	-6.56576	4.88858			-6.56576	8.48189					-9.04522	12.0742			-9.04522	12.3867
	-6.2105	4.59248			-6.2105	7.76552					-6.44995	11.4134			-6.44995	11.9901
	-6.24135	4.2939			-6.24135	7.06529					-5.79652	10.7462			-5.79652	11.5866
	-6.97758	3.78256			-6.97758	6.54104					-5.25169	10.1043			-5.25169	11.1928
	-6.34131	2.33204			-6.34131	6.923					-4.9226	9.84148			-4.9226	10.9639
	-5.26201	0.957677			-5.26201	7.29647					-4.70433	9.55972			-4.70433	10.7305
	-5.16335	-0.41714			-5.16335	7.68199					-3.22666	9.25961			-3.22666	10.4932
	-3.92513	-0.537939			-3.92513	7.7563					-3.26587	11.2234			-3.26587	10.5202
	-5.57514	-0.334618			-5.57514	7.75009					-2.72153	14.4292			-2.72153	10.6766
	-4.1825	-0.112568			-4.1825	7.74333					-2.60251	17.7094			-2.60251	10.8326
	-8.18939	0.911127			-8.18939	7.76619					-3.32465	19.1338			-3.32465	11.0395
	-5.64636	3.03899			-5.64636	7.82919					-1.95494	15.9882			-1.95494	11.3905
	-7.06262	5.28943			-7.06262	7.89327					-3.48255	12.894			-3.48255	11.7394
	-8.23773	7.52478			-8.23773	7.97614					-3.75908	9.95399			-3.75908	12.0756
	-5.4404	7.66601			-5.4404	8.51029					-3.84697	10.877			-3.84697	12.4349
	-9.04256	7.81028			-9.04256	9.05575					-3.46805	12.2253			-3.46805	12.795
	-8.16769	7.95415			-8.16769	9.59944					-2.76672	13.5463			-2.76672	13.1457
	-6.51473	8.76099			-6.51473	9.92532					-4.49345	13.3559			-4.49345	13.4399
	-10.0313	9.97456			-10.0313	10.1439					-4.53313	11.7438			-4.53313	13.6754
	-10.0727	11.2322			-10.0727	10.3582					-4.63021	10.1524			-4.63021	13.9051
	-7.0526	10.6758			-7.0526	10.4219					-4.37772	8.98776			-4.37772	14.1183
	-9.94743	5.31686			-9.94743	10.0922					-3.98888	10.6025			-3.98888	14.2053
	-9.00309	0.356788			-9.00309	9.75992					-3.65066	12.1529			-3.65066	14.2904
	-9.59285	-4.15309			-9.59285	9.43151					-3.89382	13.7119			-3.89382	14.3778
	-8.79813	-0.193637			-8.79813	8.68614					-5.62829	13.9163			-5.62829	12.5654
	-7.92191	5.50981			-7.92191	7.8894					-6.13494	13.7073			-6.13494	10.2286
	-9.77343	11.7679			-9.77343	7.11507					-4.48315	13.4728			-4.48315	7.8358
	-9.3019	14.6643			-9.3019	6.87694					-4.3187	12.9661			-4.3187	6.44167
	-7.87966	13.5914			-7.87966	7.17849					-4.76669	12.101			-4.76669	6.60249
	-8.20047	12.5621			-8.20047	7.47054					-5.07977	11.2395			-5.07977	6.76466
	-8.67624	11.7172			-8.67624	7.80293					-2.55776	10.4028			-2.55776	6.9276
	-8.97753	12.2003			-8.97753	8.3677					-2.52522	9.62419			-2.52522	7.27184
	-9.00902	12.6726			-9.00902	8.92083					-2.28026	8.77604			-2.28026	7.62445
	-11.9473	13.1572			-11.9473	9.48932					-6.29606	7.87486			-6.29606	7.97703
	-10.5256	12.7009			-10.5256	9.97763					-5.55659	8.0343			-5.55659	8.26186
	-10.385	11.9644			-10.385	10.4282					-4.18607	8.84667			-4.18607	8.51805
	-10.4953	11.2238			-10.4953	10.8897					-5.349	9.65504			-5.349	8.77212
	-11.8796	9.56725			-11.8796	11.2191					-7.11802	10.7053			-7.11802	8.95245
	-11.0786	6.5369			-11.0786	11.324					-6.16349	12.6671			-6.16349	8.92482
	-11.5438	3.59242			-11.5438	11.4315					-6.24085	14.6794			-6.24085	8.89473
	-11.257	0.80545			-11.257	11.5391					-5.5382	16.6877			-5.5382	8.86296
	-12.0942	6.26855			-12.0942	10.6877					-6.13236	16.0016			-6.13236	8.7991
	-12.0621	12.4872			-12.0621	9.81941					-6.07297	14.863			-6.07297	8.73277
	-12.3703	19.3232			-12.3703	8.95908					-7.62476	13.7529			-7.62476	8.67048
	-12.4194	20.823			-12.4194	8.59635					-6.39142	13.0401			-6.39142	8.38805
	-10.8841	18.9213			-10.8841	8.53637					-5.07093	12.7862			-5.07093	7.86836
	-11.1531	17.1021			-11.1531	8.47353					-2.58086	12.5354			-2.58086	7.35599
	-11.9	16.0701			-11.9	8.43135					-3.99209	12.2274			-3.99209	6.91897
	-11.6212	17.1626			-11.6212	8.45812					-2.70326	11.4072			-2.70326	7.09656
	-11.549	18.2812			-11.549	8.4855					-2.30777	10.593			-2.30777	7.27883
	-10.4466	19.3988			-10.4466	8.51284					-2.77692	9.80407			-2.77692	7.46105
	-11.6806	17.1962			-11.6806	8.78204					-2.97469	9.19259			-2.97469	7.52852
	-14.1123	14.3472			-14.1123	9.09668					-2.82957	8.63102			-2.82957	7.55006
	-12.1674	11.452			-12.1674	9.41032					-2.20172	8.05652			-2.20172	7.5712
	-13.2893	10.1921			-13.2893	9.76316					-2.45679	8.42457			-2.45679	7.6186
	-13.468	10.7018			-13.468	10.1821					-2.71112	10.6516			-2.71112	7.71378
	-13.0659	11.2022			-13.0659	10.602					-4.5344	12.8864			-4.5344	7.80633
	-11.3441	11.6957			-11.3441	10.9937					-4.02808	15.2221			-4.02808	7.9004
	-9.91388	12.3481			-9.91388	11.195					-2.24819	14.0333			-2.24819	7.79461
	-11.5684	13.0027			-11.5684	11.3992					-3.18333	12.8302			-3.18333	7.68504
	-12.3887	13.644			-12.3887	11.6015					-2.15039	11.656			-2.15039	7.57202
	-11.6887	14.8861			-11.6887	11.8477					-1.8799	10.9037			-1.8799	5.86765
	-13.294	16.3797			-13.294	12.1095					-2.55798	10.432			-2.55798	3.13183
	-12.9931	17.8472			-12.9931	12.365					-1.65437	9.96271			-1.65437	0.302473
	-13.1188	18.053			-13.1188	12.2598					-1.33967	9.47112			-1.33967	-1.91526
	-13.9134	15.6041			-13.9134	11.3869					-1.27842	8.86184			-1.27842	-1.87304
	-14.2092	13.2184			-14.2092	10.5051					-1.237	8.24017			-1.237	-1.83066
	-12.6924	10.7815			-12.6924	9.57147					0.177544	7.62422			0.177544	-1.78924
	-11.5961	11.2174			-11.5961	9.28125					-0.0504973	9.89683			-0.0504973	-1.80104
	-11.5124	11.7945			-11.5124	9.03019					1.20591	12.9257			1.20591	-1.83287
	-11.2477	12.3988			-11.2477	8.77305					1.18534	16.0763			1.18534	-1.8748
	-10.8076	12.1054			-10.8076	8.51265					1.35022	17.4005			1.35022	-1.92233
	-7.60455	11.1851			-7.60455	8.25532					2.01645	16.4359			2.01645	-1.96937
	-7.43855	10.2727			-7.43855	7.99194					1.81693	15.476			1.81693	-2.01575
	-7.71208	9.90671			-7.71208	7.79382					2.03396	14.576			2.03396	-2.05302
	-7.52847	11.646			-7.52847	7.85981					0.575051	14.1763			0.575051	-1.97461
	-7.21346	13.463			-7.21346	7.92737					1.34743	13.7955			1.34743	-1.89654
	-9.65854	15.3194			-9.65854	7.99505					1.5692	13.4417			1.5692	-1.82047
	-8.3105	15.1894			-8.3105	7.95831					1.97088	13.8422			1.97088	-1.7889
	-6.05233	14.6209			-6.05233	7.89682					1.42918	14.5911			1.42918	-1.77755
	-7.96867	14.0733			-7.96867	7.83549					2.60651	15.3246			2.60651	-1.76534
	-9.5539	14.9314			-9.5539	8.12428					0.123125	15.9394			0.123125	-1.73485
	-8.21991	17.7087			-8.21991	8.89702					-0.251164	16.2481			-0.251164	-1.66625
	-9.4178	20.5172			-9.4178	9.6735					2.6721	16.5521			2.6721	-1.59925
	-10.7041	23.0944			-10.7041	10.4221					1.41009	16.8644			1.41009	-1.53098
	-9.11938	21.7902			-9.11938	10.9975					1.32754	14.6472			1.32754	-1.45193
	-12.4987	20.516			-12.4987	11.5739					1.6039	12.3603			1.6039	-1.37438
	-12.3581	19.271			-12.3581	12.1512					1.59008	10.081			1.59008	-1.29495
	-13.8622	18.6293			-13.8622	11.8466					1.90834	8.9896			1.90834	-0.866151
	-12.8702	18.2508			-12.8702	11.108					1.91666	8.78918			1.91666	-0.153573
	-13.0058	17.884			-13.0058	10.3626					-0.342483	8.5603			-0.342483	0.549008
	-11.7305	17.3862			-11.7305	9.89967					0.165432	8.60069			0.165432	1.19664
	-11.5869	16.5082			-11.5869	10.0959					-2.62147	10.124			-2.62147	1.49354
	-11.2539	15.6331			-11.2539	10.2924					-3.95541	11.6364			-3.95541	1.78083
	-11.1608	14.7816			-11.1608	10.4844					-3.7311	13.2191			-3.7311	2.07427
	-10.3148	12.7911			-10.3148	10.2268					-2.64419	14.1493			-2.64419	2.15665
	-10.7364	10.7207			-10.7364	9.92441					-1.97585	14.8742			-1.97585	2.18566
	-10.8217	8.73325			-10.8217	9.62994					-3.29588	15.5992			-3.29588	2.21686
	-10.2368	9.53044			-10.2368	9.40089					-1.16874	15.0699			-1.16874	2.23431
	-9.71219	13.0174			-9.71219	9.23574					-2.33914	12.9169			-2.33914	2.2319
	-9.7854	16.7041			-9.7854	9.07476					-4.52585	10.8011			-4.52585	2.23086
	-9.13961	20.0078			-9.13961	9.04582					-1.7083	8.85912			-1.7083	2.22148
	-9.51447	19.3637			-9.51447	9.74935					-1.72518	8.82583			-1.72518	1.9804
	-11.4892	18.7472			-11.4892	10.4322					-2.82811	8.79071			-2.82811	1.73093
	-10.2133	18.1319			-10.2133	11.1235					-1.71199	8.75451			-1.71199	1.47889
	-12.0883	17.419			-12.0883	11.4559					-1.802	7.8522			-1.802	1.21711
	-11.8764	16.6863			-11.8764	11.6744					-1.66935	6.47359			-1.66935	0.942456
	-11.9178	15.9216			-11.9178	11.8913					-1.47304	5.10248			-1.47304	0.667023
	-12.4757	14.3366			-12.4757	11.8623					-1.32224	5.24698			-1.32224	0.471907
	-12.8915	11.7125			-12.8915	11.4829					-2.05162	9.80832			-2.05162	0.489463
	-12.5934	9.17061			-12.5934	11.089					-1.11183	14.8253			-1.11183	0.524201
	-13.5243	6.98712			-13.5243	10.7086					-2.40799	20.1273			-2.40799	0.575007
	-13.5091	13.5885			-13.5091	11.0718					-3.08897	14.4741			-3.08897	0.677677
	-13.7007	20.9021			-13.7007	11.3961					-2.27209	7.84291			-2.27209	0.790784
	-12.0248	28.746			-12.0248	11.6701					-2.74116	2.00858			-2.74116	0.906154
	-11.7115	28.6742			-11.7115	11.6135					-3.51474	-0.279942			-3.51474	0.838024
	-11.6237	23.9327			-11.6237	11.3844					-2.96796	0.496213			-2.96796	0.583997
	-11.767	19.3167			-11.767	11.1558					-3.34769	1.26966			-3.34769	0.33547
	-12.0498	15.1577			-12.0498	10.9062					-2.25675	1.94646			-2.25675	0.0560633
	-12.4157	11.7988			-12.4157	10.5755					-2.94155	1.7244			-2.94155	-0.379497
	-13.1675	8.69815			-13.1675	10.2592					-2.92882	1.5093			-2.92882	-0.802972
	-12.3354	5.87752			-12.3354	9.96425					-1.69791	1.29072			-1.69791	-1.23496
	-13.4278	5.63636			-13.4278	11.043					-2.42408	1.92349			-2.42408	-1.37018
	-15.3209	5.80203			-15.3209	12.333					-1.67122	2.82326			-1.67122	-1.40112
	-15.0911	5.97401			-15.0911	13.5915					-1.72765	3.75447			-1.72765	-1.42588
	-13.837	7.4379			-13.837	14.4711					-0.694371	5.35318			-0.694371	-1.41854
	-16.3182	10.3775			-16.3182	14.9324					-0.298263	8.11225			-0.298263	-1.36808
	-16.4712	13.4235			-16.4712	15.384					-0.389038	11.0985			-0.389038	-1.31655
	-15.4912	16.3004			-15.4912	15.8072					-0.146527	14.2298			-0.146527	-1.2652
	-16.7275	15.9813			-16.7275	15.9165					-1.41168	8.47264			-1.41168	-0.749803
	-16.8748	15.6618			-16.8748	16.0257					-3.16009	3.14121			-3.16009	-0.206781
	-16.9261	15.3476			-16.9261	16.1327					-3.07184	-1.44737			-3.07184	0.349279
	-16.9543	15.1569			-16.9543	15.6948					-2.03243	-1.81866			-2.03243	0.553036
	-18.637	15.0115			-18.637	15.0494					-2.48678	0.0402725			-2.48678	0.537944
	-17.2404	14.8681			-17.2404	14.4106					-2.48558	1.97809			-2.48558	0.526368
	-17.6551	15.223			-17.6551	14.3059					-6.14293	3.36544			-6.14293	0.523503
	-17.5678	16.5005			-17.5678	15.2146					-6.84346	2.94808			-6.84346	0.537047
	-16.8081	17.7681			-16.8081	16.1033					-2.90726	2.54473			-2.90726	0.550887
	-17.1227	19.0929			-17.1227	17.0192					-4.0453	2.16577			-4.0453	0.564678
	-16.7645	18.6594			-16.7645	18.3586					-3.39937	2.582			-3.39937	0.589461
	-16.8901	18.1897			-16.8901	19.6994					-2.89655	3.27132			-2.89655	0.621493
	-16.3791	17.7003			-16.3791	21.0972					-3.4354	4.1111			-3.4354	0.658784
	-18.6863	17.7708			-18.6863	22.1916					-5.65224	4.56116			-5.65224	0.577618
	-18.9455	18.1949			-18.9455	23.0594					-4.10859	4.47852			-4.10859	0.358739
	-19.5298	18.6108			-19.5298	23.9592					-2.46554	4.39843			-2.46554	0.144091
	-20.4966	18.9928			-20.4966	24.4821					-3.73872	4.30151			-3.73872	-0.0768234
	-19.0823	19.3184			-19.0823	23.6714					-1.97438	3.98201			-1.97438	-0.466214
	-19.1561	19.6715			-19.1561	22.8425					-1.77715	3.669			-1.77715	-0.852711
	-19.2226	20.0443			-19.2226	22.0152					-2.62719	3.36979			-2.62719	-1.22716
	-19.0367	18.8634			-19.0367	21.4212					-3.46719	2.80185			-3.46719	-1.31995
	-19.8592	17.3668			-19.8592	20.844					-1.5274	2.1579			-1.5274	-1.29315
	-20.0957	15.8854			-20.0957	20.2562					-0.985499	1.56885			-0.985499	-1.26755
	-20.1675	16.36			-20.1675	19.9388					0.447766	1.31811			0.447766	-0.846678
	-19.9656	19.2529			-19.9656	19.9371					-2.90919	1.77112			-2.90919	0.371294
	-20.8398	22.2477			-20.8398	19.9347					-4.10252	2.29197			-4.10252	1.54906
	-20.8884	24.9376			-20.8884	19.9867					-3.51256	2.90348			-3.51256	2.74355
	-23.2117	23.0509			-23.2117	20.7982					-3.24825	2.22262			-3.24825	2.78659
	-22.5118	21.3222			-22.5118	21.613					-2.53075	1.48369			-2.53075	2.77232
	-22.417	19.7827			-22.417	22.4113					-3.00332	0.717264			-3.00332	2.75726
	-22.1076	20.0304			-22.1076	22.4317					-4.06409	1.02204			-4.06409	2.70267
	-23.0514	21.0965			-23.0514	22.0954					-4.10575	2.10919			-4.10575	2.62061
	-23.9888	22.1853			-23.9888	21.7697					-3.73184	3.23417			-3.73184	2.53627
	-23.0287	22.177			-23.0287	21.5193					-4.19412	3.881			-4.19412	2.45724
	-23.207	19.5995			-23.207	21.4505					-3.87445	2.59603			-3.87445	2.40227
	-23.149	17.1273			-23.149	21.384					-3.84762	1.33719			-3.84762	2.34631
	-22.6493	14.6278			-22.6493	21.3162					-2.72474	0.136225			-2.72474	2.29061
	-22.8171	15.0544			-22.8171	21.5853					-3.46769	0.591388			-3.46769	2.25625
	-22.9923	15.6701			-22.9923	21.8713					-3.4882	1.42693			-3.4882	2.22543
	-22.4881	16.3011			-22.4881	22.1647					-0.120618	2.26051			-0.120618	2.19462
	-22.8764	16.7775			-22.8764	22.05					-2.453	2.22907			-2.453	2.29592
	-23.2344	17.1387			-23.2344	21.6191					-1.8571	1.14652			-1.8571	2.57376
	-23.9148	17.5292			-23.9148	21.1806					-3.94157	0.203757			-3.94157	2.84498
	-24.858	18.0998			-24.858	20.8134					-3.62127	-0.506658			-3.62127	3.09789
	-23.6258	19.4069			-23.6258	20.779					-2.12102	0.370169			-2.12102	3.26561
	-23.0652	20.6924			-23.0652	20.755					-2.82655	1.26808			-2.82655	3.42944
	-22.7912	22.0183			-22.7912	20.7409					-2.71808	2.18574			-2.71808	3.58935
	-23.9244	22.3292			-23.9244	21.2035					-6.27115	3.14209			-6.27115	4.30285
	-23.4141	22.4004			-23.4141	21.7717					-6.57327	4.14781			-6.57327	5.3021
	-24.944	22.489			-24.944	22.3573					-6.73714	5.15654			-6.73714	6.29769
	-26.5228	22.171			-26.5228	22.8543					-5.88969	5.94873			-5.88969	7.00809
	-24.1107	21.3546			-24.1107	23.2269					-5.83362	6.28661			-5.83362	7.0958
	-24.57	20.5909			-24.57	23.6187					-6.16652	6.63821			-6.16652	7.18306
	-26.06	19.9473			-26.06	23.9867					-6.65968	6.9945			-6.65968	7.26778
	-23.4045	20.3179			-23.4045	23.6547					-6.71727	8.14729			-6.71727	6.95654
	-23.9335	20.6912			-23.9335	23.316					-7.57917	9.46086			-7.57917	6.60455
	-23.9301	21.059			-23.9301	22.9778					-8.07378	10.8236			-8.07378	6.26016
	-23.7631	20.53			-23.7631	22.7442					-6.99678	9.54013			-6.99678	5.71836
	-22.7116	19.5276			-22.7116	22.556					-7.40886	6.01539			-7.40886	5.0101
	-26.0979	18.5263			-26.0979	22.3689					-5.98622	2.80968			-5.98622	4.31662
	-25.2804	17.6959			-25.2804	22.3617					-5.76416	0.361945			-5.76416	3.60092
	-23.9373	17.2385			-23.9373	22.8244					-4.16763	1.0312			-4.16763	2.85095
	-21.0689	16.7891			-21.0689	23.2866					-5.81537	1.69163			-5.81537	2.1116
	-22.0681	16.3606			-22.0681	23.7347					-3.37358	2.37103			-3.37358	1.35145
	-22.8652	15.6113			-22.8652	22.6232					-5.3257	2.78281			-5.3257	0.839157
	-22.4669	14.8228			-22.4669	21.3194					-1.54586	3.10536			-1.54586	0.409537
	-22.727	14.0526			-22.727	20.0469					-4.22205	3.43396			-4.22205	-0.0325377
	-21.2548	13.5948			-21.2548	19.5902					-4.86516	4.60546			-4.86516	0.0345837
	-20.2863	13.4551			-20.2863	19.9307					-3.5099	7.0735			-3.5099	0.839394
	-22.4661	13.3217			-22.4661	20.2504					-4.48805	9.73678			-4.48805	1.66388
	-21.56	13.4257			-21.56	20.4871					-5.32742	12.3179			-5.32742	2.49125
	-22.2392	15.0356			-22.2392	20.2194					-6.3691	7.03804			-6.3691	3.42888
	-20.6936	16.5779			-20.6936	19.9585					-6.48178	2.50192			-6.48178	4.42207
	-19.7799	18.1262			-19.7799	19.6916					-8.08645	-1.01058			-8.08645	5.44437
	-19.5911	17.5603			-19.5911	19.2567					-7.34947	-1.17337			-7.34947	6.0615
	-20.9956	16.3429			-20.9956	18.7797					-9.75664	0.450251			-9.75664	6.45826
	-20.2562	15.0894			-20.2562	18.2941					-8.82804	2.42694			-8.82804	6.85546
	-20.9219	13.8842			-20.9219	17.8698					-9.45454	4.89588			-9.45454	7.34059
	-20.8605	12.8233			-20.8605	17.5534					-11.556	8.28011			-11.556	8.14875
	-21.0349	11.7705			-21.0349	17.2299					-9.14087	11.7265			-9.14087	8.97249
	-20.5667	10.7564			-20.5667	16.9078					-11.6498	15.1315			-11.6498	9.79124
	-19.884	11.5695			-19.884	16.9141					-11.5738	16.1222			-11.5738	9.86858
	-20.1828	12.4296			-20.1828	16.919					-15.5728	16.7115			-15.5728	9.80956
	-20.1398	13.3169			-20.1398	16.9223					-13.0428	17.2782			-13.0428	9.73473
	-19.8399	13.4379			-19.8399	16.8193					-11.6191	16.0346			-11.6191	9.292
	-18.9033	13.0758			-18.9033	16.6479					-12.0009	13.0212			-12.0009	8.47923
	-21.73	12.7082			-21.73	16.4766					-11.3438	10.2602			-11.3438	7.68491
	-12.7706	12.0841			-12.7706	12.2411					-9.93735	7.86974			-9.93735	6.96828
	-11.6751	13.1884			-11.6751	13.1232					-9.23083	7.35582			-9.23083	7.00899
	-14.485	14.2665			-14.485	13.9798					-9.47377	6.84363			-9.47377	7.04946
	-15.245	14.3398			-15.245	14.5196					-9.53122	6.34235			-9.53122	7.08899
	-17.6843	12.3631			-17.6843	14.3419					-9.70739	6.06822			-9.70739	7.40751
	-16.9966	10.6785			-16.9966	14.1687					-11.4835	5.86269			-11.4835	7.82204
	-17.5751	9.20651			-17.5751	13.9916					-10.4634	5.64293			-10.4634	8.22049
	-17.3268	8.61839			-17.3268	13.764					-10.4984	5.14828			-10.4984	8.32227
	-15.0143	8.09937			-15.0143	13.5364					-10.9	4.22011			-10.9	7.8804
	-14.8137	7.57758			-14.8137	13.3007					-9.17509	3.34456			-9.17509	7.4545
	-14.6017	7.60043			-14.6017	13.4476					-9.85707	2.47633			-9.85707	7.0221
	-14.7798	8.04219			-14.7798	13.895					-8.75804	2.40094			-8.75804	6.08571
	-15.562	8.5089			-15.562	14.3691					-8.39831	2.34705			-8.39831	5.20414
	3.0006	-3.62067			3.0006	1.01494					-6.04271	2.29494			-6.04271	4.34755
	6.6223	-2.49755			6.6223	0.446949					-7.0626	2.74737			-7.0626	3.55829
	4.94965	-1.27982			4.94965	-0.11922					-5.60216	3.52025			-5.60216	2.82063
	2.33987	-0.0833042			2.33987	-0.403639					-3.88773	4.31592			-3.88773	2.07926
	5.66605	1.04832			5.66605	0.1193					-4.172	4.75214			-4.172	1.46648
	3.94115	2.61029			3.94115	0.650555					-2.31939	3.93725			-2.31939	1.25811
	3.48315	4.57118			3.48315	1.17736					-1.50781	3.10052			-1.50781	1.03667
	3.08046	2.54553			3.08046	1.31844					-1.00533	2.26226			-1.00533	0.8072
	4.6993	-0.0762687			4.6993	1.40838					0.00605841	2.69034			0.00605841	1.1299
	6.18991	-2.62827			6.18991	1.49853					0.953723	3.4089			0.953723	1.5625
	5.15959	-3.41618			5.15959	1.46705					0.996958	4.16984			0.996958	1.99018
	3.59774	-2.43815			3.59774	1.30637					1.19287	3.6903			1.19287	2.24525
	6.437	-1.46213			6.437	1.14568					1.79734	1.78344			1.79734	2.3122
	3.83741	-0.593335			3.83741	0.950112					2.06249	0.0429314			2.06249	2.37954
	4.84131	-0.448918			4.84131	0.39813					4.16016	-1.25909			4.16016	2.45996
	4.6521	-0.301371			4.6521	-0.158173					1.24581	0.77133			1.24581	2.72929
	7.50641	-0.153393			7.50641	-0.709032					2.42321	2.83156			2.42321	2.98935
	11.0231	-0.486426			11.0231	-1.25333					2.41882	4.8594			2.41882	3.2342
	8.63194	-0.983655			8.63194	-1.79007					0.899223	4.63816			0.899223	3.44222
	9.02229	-1.44233			9.02229	-2.31435					-0.386854	3.39688			-0.386854	3.63883
	12.5864	-1.71005			12.5864	-2.62364					-1.30933	2.20407			-1.30933	3.83612
	15.3505	-1.62675			15.3505	-2.48844					-0.691012	1.66214			-0.691012	3.91281
	13.4259	-1.53835			13.4259	-2.3494					-1.94664	2.67943			-1.94664	3.70002
	13.9791	-1.44001			13.9791	-2.1991					-2.30028	3.78923			-2.30028	3.49306
	16.0977	-1.66476			16.0977	-2.46376					-2.07297	5.04823			-2.07297	3.28056
	18.6225	-1.76326			18.6225	-2.74087					-1.72182	4.86842			-1.72182	3.35245
	14.6534	-1.71701			14.6534	-3.0291					-1.74057	4.59705			-1.74057	3.44097
	18.1429	-1.68699			18.1429	-3.24954					-2.71934	4.32635			-2.71934	3.53045
	18.3718	-1.62973			18.3718	-3.41709					-3.14872	4.79703			-3.14872	3.79028
	16.9921	-1.41538			16.9921	-3.59046					-4.092	5.82225			-4.092	4.1792
	5.50622	-3.99018			5.50622	-4.05785					-4.22054	6.85305			-4.22054	4.57702
	6.48601	-3.54999			6.48601	-3.9702					-4.64855	7.57797			-4.64855	4.98261
	6.99938	-1.06825			6.99938	-3.87886					-4.58472	6.97371			-4.58472	5.42825
	9.17407	3.13409			9.17407	-3.78575					-5.13293	6.4175			-5.13293	5.88295
	7.56019	4.57346			7.56019	-3.14833					-4.58209	5.88278			-4.58209	6.36857
	10.4072	3.99449			10.4072	-2.18496					-5.56551	6.28351			-5.56551	6.68581
	10.905	3.41474			10.905	-1.21732					-6.5135	6.87706			-6.5135	6.94898
	6.17949	3.12442			6.17949	-0.362975					-7.49754	7.46354			-7.49754	7.21512
	10.0837	3.62551			10.0837	0.245846					-9.40132	8.39384			-9.40132	7.66836
	6.01178	4.13355			6.01178	0.857436					-9.03665	9.78454			-9.03665	8.3629
	5.85897	4.63202			5.85897	1.45357					-9.69544	11.2058			-9.69544	9.07206
	4.27026	4.2471			4.27026	4.60806					-12.8169	12.5308			-12.8169	9.7523
	1.44885	4.15621			1.44885	4.02677					-11.9228	11.9945			-11.9228	9.87689
	2.48706	4.0709			2.48706	3.46122					-12.3567	11.4431			-12.3567	10.0054
	2.97468	3.98759			2.97468	2.88731					-12.7163	10.8887			-12.7163	10.135
	1.26175	2.10359			1.26175	2.48382					-14.4994	10.9161			-14.4994	10.2702
	1.62369	-0.206075			1.62369	2.07628					-12.9044	11.2604			-12.9044	10.4156
	2.55835	-2.24793			2.55835	1.61716					-14.7453	11.6271			-14.7453	10.5643
	1.4278	-3.02233			1.4278	1.83174					-12.0442	12.041			-12.0442	10.6715
	2.58759	-1.81645			2.58759	3.30352					-11.8735	12.5716			-11.8735	10.6709
	-0.334782	-0.599522			-0.334782	4.73764					-13.0041	13.1072			-13.0041	10.6678
	2.76484	0.682447			2.76484	6.1975					-15.1212	13.6316			-15.1212	10.6627
	0.944309	0.35897			0.944309	5.83919					-14.31	13.9648			-14.31	10.7965
	1.52757	0.0123082			1.52757	5.47485					-13.1813	14.2863			-13.1813	10.9368
	2.04055	-0.359544			2.04055	5.10349					-12.8545	14.614			-12.8545	11.0631
	1.0835	-0.0891366			1.0835	5.05802					-11.4328	14.6257			-11.4328	10.8772
	-0.426895	0.566055			-0.426895	5.21199					-13.5085	14.3074			-13.5085	10.3983
	-0.12458	1.23056			-0.12458	5.37041					-13.214	13.9824			-13.214	9.93124
	-1.50484	1.77976			-1.50484	5.55756					-12.3402	13.6939			-12.3402	9.50706
	0.55794	1.97949			0.55794	5.82696					-13.6635	13.8057			-13.6635	9.42598
	-5.12226	2.18026			-5.12226	6.09595					-13.5449	13.9632			-13.5449	9.34595
	-9.56847	2.37737			-9.56847	6.3572					-11.9337	14.1736			-11.9337	9.26308
	-9.93508	4.69909			-9.93508	7.3566					-12.8066	14.6773			-12.8066	9.39936
	-9.35565	7.5828			-9.35565	8.51961					-13.8607	15.2798			-13.8607	9.6027
	-9.22115	10.6057			-9.22115	9.69016					-12.6686	15.928			-12.6686	9.81177
	-12.963	8.47778			-12.963	11.4416					-13.2402	16.7922			-13.2402	9.939
	-11.2688	8.07907			-11.2688	10.6462					-13.1816	17.95			-13.1816	9.92879
	-12.1378	7.67585			-12.1378	9.836					-14.4002	19.1536			-14.4002	9.91735
	-11.2841	7.84675			-11.2841	9.9021					-14.6374	20.3669			-14.6374	9.90452
	-8.94508	8.39143			-8.94508	10.606					-15.216	19.3089			-15.216	9.79999
	-14.5697	8.90264			-14.5697	11.3306					-15.4659	18.2431			-15.4659	9.6943
	-7.0238	10.6698			-7.0238	12.3209					-15.4799	17.1963			-15.4799	9.59002
	-8.25919	9.87189			-8.25919	13.3518					-15.6993	16.7485			-15.6993	9.42487
	-10.3748	9.11745			-10.3748	14.3858					-14.3328	16.6477			-14.3328	9.21507
	-10.7845	8.31611			-10.7845	14.4127					-15.0503	16.5496			-15.0503	9.00407
	-8.91696	7.41375			-8.91696	13.3763					-27.3988	9.88173			-27.3988	12.4109
	-11.068	6.53772			-11.068	12.2869					-25.1347	9.48688			-25.1347	12.2884
	-11.3897	5.74391			-11.3897	11.2299					-23.0497	9.12379			-23.0497	12.1602
	-10.1481	5.23847			-10.1481	10.6068					-26.5976	9.85976			-26.5976	12.199
	-11.7355	4.73798			-11.7355	9.98804					-27.0916	12.98			-27.0916	12.6199
	-11.1222	4.25783			-11.1222	9.39134					-27.0304	16.0736			-27.0304	13.031
	-11.578	2.78168			-11.578	9.43364					-25.829	19.2697			-25.829	13.4524
	-10.8401	0.935891			-10.8401	9.72572					-25.1501	19.0454			-25.1501	14.1496
	-9.44756	-0.863915			-9.44756	10.0153					-26.5895	18.5957			-26.5895	14.8467
	-10.7883	-1.55089			-10.7883	10.1312					-27.877	18.1152			-27.877	15.5603
	-8.11933	-0.0599135			-8.11933	9.89596					-27.7813	18.2773			-27.7813	16.3192
	-10.1854	1.42921			-10.1854	9.65551					-28.7063	18.9064			-28.7063	17.0986
	-10.9092	2.98954			-10.9092	9.39801					-28.6469	19.5134			-28.6469	17.8981
	-16.0808	8.99151			-16.0808	12.4644					-35.9037	34.1911			-35.9037	25.1029
	-17.3229	8.21028			-17.3229	12.3847					-34.4986	31.7552			-34.4986	25.0217
	-15.9553	7.44137			-15.9553	12.2959					-37.0322	29.3549			-37.0322	24.9388
	-16.0116	6.70272			-16.0116	12.1995					-33.8859	26.5044			-33.8859	24.7637
	-18.7031	7.58648			-18.7031	12.521					-35.5778	22.2795			-35.5778	24.3308
	-19.264	8.79826			-19.264	12.935					-36.1768	17.8934			-36.1768	23.8849
	-17.9289	9.99931			-17.9289	13.3504					-33.2011	13.4878			-33.2011	23.4367
	-20.5601	10.9612			-20.5601	13.5132					-35.7683	14.8912			-35.7683	23.5526
	-19.917	11.7042			-19.917	13.3719					-34.0009	17.2886			-34.0009	23.753
	-19.9287	12.4521			-19.9287	13.2263					-32.7943	19.805			-32.7943	23.9533
	4.95325	-0.107334			4.95325	6.70911					-30.0504	20.9303			-30.0504	24.4014
	1.83843	0.545067			1.83843	7.27945					-33.6821	20.5486			-33.6821	25.1305
	-0.883712	1.38635			-0.883712	7.85133					-34.7168	20.1608			-34.7168	25.8619
	2.56786	1.93624			2.56786	8.04949					-35.2614	19.7723			-35.2614	26.5895
	0.98326	1.30777			0.98326	7.24048					-35.5248	19.3345			-35.5248	27.4376
	-3.65079	0.694973			-3.65079	6.4278					-36.6272	18.8952			-36.6272	28.2833
	-2.00661	0.111955			-2.00661	5.63094					-36.6061	18.4623			-36.6061	29.1113
	-4.1612	0.576314			-4.1612	4.93529					-35.8892	19.2128			-35.8892	29.7454
	-0.118267	1.18949			-0.118267	4.25284					-36.5886	20.4237			-36.5886	30.298
	-3.45604	1.8015			-3.45604	3.5822					-37.66	21.6039			-37.66	30.8364
	-2.58189	1.88337			-2.58189	3.14484					-37.9931	22.6306			-37.9931	31.505
	-3.5119	1.42514			-3.5119	2.95223					-37.9941	23.2989			-37.9941	32.392
	0.0139046	0.97591			0.0139046	2.76735					-37.8205	23.9482			-37.8205	33.258
	-0.560341	0.496809			-0.560341	2.61697					-40.1617	24.6127			-40.1617	34.149
	-2.11533	-0.0999869			-2.11533	2.69852					-38.7349	27.0536			-38.7349	35.2066
	-2.43769	-0.673517			-2.43769	2.77471					-39.4598	29.4704			-39.4598	36.2459
	-3.16912	-1.24812			-3.16912	2.84876					-39.3187	31.9079			-39.3187	37.3115
	-1.29967	-1.42678			-1.29967	2.70827					-39.931	34.2403			-39.931	38.0632
	-0.407634	-1.47938			-0.407634	2.4992					-41.8469	36.4276			-41.8469	38.5814
	-1.43457	-1.53255			-1.43457	2.29191					-42.9123	38.6115			-42.9123	39.1123
	-5.39531	-1.67774			-5.39531	1.94749					-42.8211	41.6677			-42.8211	35.7544
	-3.37327	-1.97219			-3.37327	1.37869					-42.3817	32.7528			-42.3817	35.4476
	-1.91672	-2.25805			-1.91672	0.820005					-42.6774	23.3271			-42.6774	35.1348
	-1.35904	-2.55055			-1.35904	0.241727					-41.5079	13.9184			-41.5079	34.8228
	0.325931	-2.92296			0.325931	0.532397					-41.4645	10.8076			-41.4645	34.7331
	-1.61281	-3.28633			-1.61281	0.81501					-41.593	10.861			-41.593	34.755
	0.751379	-3.66034			0.751379	1.1016					-42.5724	10.904			-42.5724	34.7718
	-0.829294	-4.57604			-0.829294	0.518709					-42.0382	11.061			-42.0382	34.7907
	1.88084	-5.78977			1.88084	-0.577408					-42.2528	11.5558			-42.2528	34.8287
	1.31943	-7.02701			1.31943	-1.70824					-42.2835	12.0159			-42.2835	34.8643
	6.14549	-7.91533			6.14549	-2.63406					-42.2407	12.4287			-42.2407	34.8963
	7.65087	-7.73487			7.65087	-2.88891					-41.9281	18.4458			-41.9281	36.2831
	8.08287	-7.55665			8.08287	-3.14934					-43.7418	19.0488			-43.7418	36.0678
	8.61698	-7.38501			8.61698	-3.40912					-43.1782	20.2411			-43.1782	35.6342
	11.3803	-7.1511			11.3803	-4.75317					-43.6918	23.0227			-43.6918	33.6592
	12.6636	-6.88915			12.6636	-6.34932					-43.0109	26.6523			-43.0109	31.0547
	13.5586	-6.61541			13.5586	-7.98929					-42.8409	30.2965			-42.8409	28.4784
	15.0714	-6.2542			15.0714	-8.23644					-41.1918	32.039			-41.1918	26.6986
	16.9952	-5.80277			16.9952	-6.9162					-44.097	30.2483			-44.097	26.4347
	16.5339	-5.36782			16.5339	-5.59307					-43.769	28.5298			-43.769	26.1599
	16.6149	-5.07406			16.6149	-4.3584					-41.3005	26.8084			-41.3005	25.8617
	14.9793	-5.91062			14.9793	-3.71372					-42.7469	26.8862			-42.7469	25.7111
	15.6987	-6.61585			15.6987	-3.06613					-40.7478	26.9774			-40.7478	25.5635
	16.6301	-7.17418			16.6301	-2.42734					-44.294	27.072			-44.294	25.4112
	14.5778	-6.49514			14.5778	-1.56241					-41.6161	26.9817			-41.6161	25.3215
	14.1121	-5.34048			14.1121	-0.620256					-41.6272	26.7882			-41.6272	25.2726
	9.81464	-4.21129			9.81464	0.288482					-43.0604	26.5995			-43.0604	25.2223
	15.2817	-3.71178			15.2817	0.815913					-43.7235	26.3844			-43.7235	25.2105
	8.68648	-4.55479			8.68648	0.542236					-43.1014	26.0599			-43.1014	25.3287
	10.7818	-5.37059			10.7818	0.285356					-43.2429	25.7234			-43.2429	25.4642
	12.8501	-6.20286			12.8501	0.0314711					-42.7043	22.6702			-42.7043	25.9128
	8.32476	-4.47918			8.32476	0.446376					-44.2212	19.6482			-44.2212	26.2386
	11.6638	-2.5148			11.6638	0.877802					-43.1318	16.8313			-43.1318	26.5578
	7.71	-0.342893			7.71	1.31356					-40.6346	17.6288			-40.6346	23.4876
	8.5045	0.118361			8.5045	1.05677					-42.5956	17.1411			-42.5956	23.2035
	7.70133	-0.753872			7.70133	0.313643					-42.0554	16.6378			-42.0554	22.9061
	9.30437	-1.65871			9.30437	-0.443297					-42.0062	16.2646			-42.0062	22.9377
	7.63746	-2.66236			7.63746	-0.817221					-42.179	15.9817			-42.179	23.2112
	6.7343	-3.95367			6.7343	0.30896					-43.7651	15.6665			-43.7651	23.4901
	8.57247	-5.2125			8.57247	1.45612					-37.2667	16.81			-37.2667	17.6514
	9.15367	-6.40543			9.15367	2.5973					-36.7343	18.2947			-36.7343	17.7134
	9.17498	-6.63433			9.17498	2.23006					-37.6384	19.794			-37.6384	17.7716
	9.10537	-6.65957			9.10537	1.55962					-37.4833	21.1528			-37.4833	18.3692
	8.97053	-6.68612			8.97053	0.885849					-37.3763	22.4391			-37.3763	19.5367
	8.91311	-6.58207			8.91311	0.266587					-39.5483	23.7436			-39.5483	20.6888
	8.82826	-6.28278			8.82826	-0.282378					-36.4075	24.8586			-36.4075	21.6379
	9.10484	-5.92802			9.10484	-0.839741					-36.3497	24.5017			-36.3497	21.2461
	11.5909	-5.54599			11.5909	-1.41677					-36.0599	24.1204			-36.0599	20.8586
	9.23798	-5.45806			9.23798	-2.27992					-35.8558	23.727			-35.8558	20.4871
	9.98968	-5.37107			9.98968	-3.16972					-35.54	24.4223			-35.54	20.1053
	10.1349	-5.287			10.1349	-4.06502					-35.4349	25.5835			-35.4349	19.7278
	8.52519	-4.40729			8.52519	-2.89521					-36.1686	26.7665			-36.1686	19.3658
	7.28251	-3.12993			7.28251	-0.699143					-35.15	26.9194			-35.15	19.2892
	5.24687	-1.85664			5.24687	1.52027					-33.2687	25.0564			-33.2687	19.7504
	2.84162	-0.638955			2.84162	3.15566					-32.9618	23.286			-32.9618	20.2003
	2.74366	0.587072			2.74366	3.4866					-34.1886	21.5237			-34.1886	20.6607
	1.70216	1.84596			1.70216	3.81744					-36.0719	14.6335			-36.0719	22.6477
	0.971478	3.10777			0.971478	4.14026					-32.8915	15.7751			-32.8915	23.1265
	-2.27633	2.14687			-2.27633	6.00574					-32.9331	16.954			-32.9331	23.6158
	-4.80711	1.33895			-4.80711	8.06452					-34.0589	18.1439			-34.0589	24.1047
	-3.92186	0.966393			-3.92186	10.1144					-37.4519	17.9974			-37.4519	24.76
	-19.8647	12.8043			-19.8647	17.4153					-34.3862	17.6146			-34.3862	25.4646
	-17.8597	11.7196			-17.8597	16.6421					-35.9374	17.2633			-35.9374	26.1668
	-17.1083	10.6538			-17.1083	15.8663					-35.1732	16.7967			-35.1732	26.4154
	-16.981	9.63787			-16.981	15.1107					-35.3148	16.1392			-35.3148	26.1273
	-16.103	9.8098			-16.103	14.2452					-36.3595	15.494			-36.3595	25.8414
	-16.2223	10.5255			-16.2223	13.3308					-44.1978	27.9373			-44.1978	23.5452
	-16.1067	11.2954			-16.1067	12.4232					-42.9623	25.0672			-42.9623	23.6048
	-14.6066	10.9778			-14.6066	11.6288					-42.6646	22.1333			-42.6646	23.6669
	-14.6229	8.4121			-14.6229	11.1243					-41.9146	20.2748			-41.9146	23.6848
	-13.5372	5.97219			-13.5372	10.6302					-39.0804	21.3083			-39.0804	23.5747
	-11.3051	3.53949			-11.3051	10.1224					-40.4438	22.3501			-40.4438	23.46
	-9.75264	3.61991			-9.75264	9.16132					-41.0013	23.3747			-41.0013	23.3434
	-9.57789	3.80193			-9.57789	8.15375					-40.8619	22.4536			-40.8619	23.3289
	-7.32673	3.98754			-7.32673	7.06689					-37.2651	21.2535			-37.2651	23.3243
	-6.59261	3.86149			-6.59261	6.33759					-38.3513	20.0614			-38.3513	23.3153
	-6.6624	3.50982			-6.6624	5.87923					-38.1756	19.5773			-38.1756	23.1319
	-7.88904	3.13945			-7.88904	5.3773					-37.923	19.8192			-37.923	22.7832
	-3.73585	3.18904			-3.73585	4.97642					-37.1699	20.0551			-37.1699	22.4441
	-5.80185	4.94			-5.80185	5.0952					-38.0415	20.3814			-38.0415	22.2065
	-8.12236	6.83251			-8.12236	5.21495					-37.3148	21.2807			-37.3148	22.6777
	-8.56219	8.8281			-8.56219	5.33292					-38.9283	22.1692			-38.9283	23.1388
	-0.784832	-4.60166			-0.784832	8.09866					-36.1945	23.0844			-36.1945	23.6095
	-2.41846	-5.13983			-2.41846	8.05102					-36.8216	23.7773			-36.8216	23.9395
	0.568408	-5.71072			0.568408	8.00859					-36.2825	24.3926			-36.2825	24.2218
	-1.22013	-5.27247			-1.22013	7.4728					-35.9359	25.0008			-35.9359	24.5006
	-1.13183	-3.54522			-1.13183	6.5144					-37.1474	25.1528			-37.1474	24.9297
	-1.87227	-1.42421			-1.87227	5.58118					-36.6948	24.5259			-36.6948	25.5999
	-0.176445	0.45735			-0.176445	4.71922					-38.1866	23.9156			-38.1866	26.2514
	1.13959	-1.1021			1.13959	4.30698					-38.7876	23.2895			-38.7876	26.9187
	0.270845	-2.64286			0.270845	3.90611					-38.9787	23.3656			-38.9787	26.8255
	0.744909	-4.2334			0.744909	3.49869					-39.8609	23.4443			-39.8609	26.7309
	0.140908	-4.67408			0.140908	3.73951					-39.5615	23.5269			-39.5615	26.6327
	0.693958	-4.74822			0.693958	4.1457					-38.2854	24.2908			-38.2854	27.061
	1.55304	-4.76806			1.55304	4.5606					-40.1354	25.4681			-40.1354	27.7912
	0.701268	-4.3582			0.701268	5.02384					-40.0666	26.7028			-40.0666	28.5334
	0.934938	-3.42111			0.934938	5.5451					-38.7738	27.556			-38.7738	29.0627
	-1.91663	-2.46933			-1.91663	6.07984					-41.8149	27.1457			-41.8149	28.9441
	-0.927852	-1.48789			-0.927852	6.63983					-41.9499	26.7232			-41.9499	28.822
	-1.41248	0.653767			-1.41248	7.97059					-41.6308	26.2987			-41.6308	28.6994
	-5.41806	2.81231			-5.41806	9.34795					-42.5681	25.508			-42.5681	30.1092
	-4.2012	4.92922			-4.2012	10.7368					-41.1412	24.6291			-41.1412	31.7981
	-5.36477	5.86621			-5.36477	10.9842					-42.0285	23.7436			-42.0285	33.474
	-6.94245	6.20039			-6.94245	10.5915					-44.8526	21.5366			-44.8526	27.7165
	-8.92109	6.53771			-8.92109	10.187					-42.5565	22.7944			-42.5565	27.2005
	-10.0936	6.99326			-10.0936	10.0726					-42.3587	23.7702			-42.3587	26.7712
	-10.8576	7.82965			-10.8576	10.8218					-41.4554	25.9916			-41.4554	25.7056
	-9.3874	8.66909			-9.3874	11.5741					-41.1836	28.3008			-41.1836	24.6125
	-9.43741	9.49491			-9.43741	12.3147					-42.1757	30.6413			-42.1757	23.518
	-11.6896	9.21564			-11.6896	12.305					-41.5795	30.5454			-41.5795	22.5832
	-12.5317	8.8038			-12.5317	12.1763					-38.2537	29.9243			-38.2537	21.7013
	-14.6269	8.42466			-14.6269	12.038					-40.0901	29.2883			-40.0901	20.7938
	-7.42774	22.3425			-7.42774	9.53629					-36.16	28.2075			-36.16	20.5993
	-7.98904	18.8263			-7.98904	9.28892					-38.3026	26.596			-38.3026	21.2945
	-7.71946	15.2964			-7.71946	9.03719					-37.3892	24.945			-37.3892	22.0073
	-7.13758	11.842			-7.13758	8.78663					-35.1122	23.3743			-35.1122	22.6877
	-5.11124	10.0077			-5.11124	8.2777					-35.6341	23.0784			-35.6341	22.8298
	-6.62372	8.86805			-6.62372	7.62494					-35.5894	22.7701			-35.5894	22.9669
	-6.24497	7.71158			-6.24497	6.97592					-35.6183	22.4564			-35.6183	23.0953
	-2.72126	6.39952			-2.72126	6.35436					-39.0222	21.845			-39.0222	23.5088
	-3.94652	4.57084			-3.94652	5.7364					-36.6536	21.0988			-36.6536	24.0406
	-1.99928	2.70344			-1.99928	5.12173					-36.8435	20.3799			-36.8435	24.5333
	-1.35454	0.843219			-1.35454	4.52491					-38.8966	20.2541			-38.8966	24.9324
	-2.30591	1.17033			-2.30591	3.99003					-38.1894	21.4774			-38.1894	25.2244
	-2.42838	1.75491			-2.42838	3.46541					-37.1937	22.673			-37.1937	25.515
	-1.93515	2.32306			-1.93515	2.9548					-38.5226	23.8122			-38.5226	25.7971
	0.130532	2.41927			0.130532	2.95365					-38.938	27.6163			-38.938	26.7694
	-1.19516	2.09107			-1.19516	3.43595					-40.9407	31.6448			-40.9407	27.7738
	-1.71704	1.79905			-1.71704	3.90988					-39.7111	35.5017			-39.7111	28.7155
	1.63336	1.90841			1.63336	4.31394					-32.755	17.5754			-32.755	17.5677
	-3.42553	4.44546			-3.42553	4.19971					-31.6486	18.5924			-31.6486	18.3172
	-1.12405	7.09307			-1.12405	4.08233					-32.8478	19.6377			-32.8478	19.0676
	1.74434	9.98462			1.74434	3.95602					-32.7064	20.6785			-32.7064	19.7966
	-0.570273	8.41841			-0.570273	4.26694					-33.158	19.8157			-33.158	20.477
	-3.55581	5.69584			-3.55581	4.69853					-32.4359	18.1691			-32.4359	21.1226
	-1.99019	3.12112			-1.99019	5.13461					-31.9385	16.5591			-31.9385	21.7439
	-7.2036	6.95631			-7.2036	6.56718					-32.6269	16.0977			-32.6269	22.2986
	-8.20015	6.76544			-8.20015	5.92835					-33.8002	18.0652			-33.8002	22.707
	-6.1364	6.56714			-6.1364	5.27651					-35.8933	20.1179			-35.8933	23.1046
	-3.81489	6.10084			-3.81489	4.93363					-35.3706	22.3481			-35.3706	23.5107
	-5.35976	4.90997			-5.35976	5.46775					-36.3033	21.9472			-36.3033	25.0102
	-4.95491	3.71297			-4.95491	6.01553					-37.1153	21.4291			-37.1153	26.5058
	-2.32033	2.53929			-2.32033	6.56387					-36.3068	20.8851			-36.3068	28.0214
	-5.95064	2.19637			-5.95064	6.19625					-36.4229	20.9283			-36.4229	29.3483
	-4.8282	1.95782			-4.8282	5.68796					-37.2021	21.3856			-37.2021	30.5157
	-4.40075	1.71846			-4.40075	5.17985					-38.2527	21.8452			-38.2527	31.6978
	-4.59224	1.64535			-4.59224	4.80734					-38.3517	21.7042			-38.3517	32.7802
	-3.95252	1.76157			-3.95252	4.5627					-38.0936	19.34			-38.0936	33.4823
	-2.98081	1.90248			-2.98081	4.3239					-41.0128	16.9942			-41.0128	34.1986
	-5.80565	2.21569			-5.80565	4.20688					-41.3526	14.7276			-41.3526	34.9134
	-3.86971	3.98345			-3.86971	5.11102					-39.2666	33.2411			-39.2666	25.2891
	-4.82527	5.81637			-4.82527	6.01372					-41.2843	34.345			-41.2843	24.1118
	-2.77045	7.66892			-2.77045	6.89342					-39.8074	35.4051			-39.8074	22.9629
	-1.89872	7.38844			-1.89872	7.44525					-39.1525	33.1271			-39.1525	22.1964
	-3.04996	6.40722			-3.04996	7.86372					-38.87	27.9907			-38.87	21.7795
	-6.1897	5.63322			-6.1897	8.27436					-37.8209	23.0314			-37.8209	21.368
	-4.34264	5.72362			-4.34264	8.82329					-36.0852	18.9053			-36.0852	20.8544
	-5.03921	7.1924			-5.03921	9.61596					-37.1665	19.1741			-37.1665	19.8652
	-3.74766	8.61734			-3.74766	10.3939					-33.7733	19.4704			-33.7733	18.8944
	-3.32399	10.0611			-3.32399	11.1916					-33.9988	19.8068			-33.9988	17.8987
	-7.15796	9.80834			-7.15796	11.9113					-34.1312	21.2131			-34.1312	17.6035
	-8.96559	9.48798			-8.96559	12.6198					-34.4679	22.8494			-34.4679	17.5008
	-6.71937	9.13954			-6.71937	13.3501					-32.1698	24.5057			-32.1698	17.3939
	-5.86759	9.27895			-5.86759	8.2504					-32.5302	25.4886			-32.5302	17.392
	-2.90647	6.02718			-2.90647	6.09024					-32.8441	25.5221			-32.8441	17.5442
	-1.49444	2.75175			-1.49444	3.94357					-32.3633	25.5685			-32.3633	17.7044
	-0.979519	0.901326			-0.979519	2.77579					-31.2982	25.5898			-31.2982	17.8809
	2.00901	0.780189			2.00901	2.76095					-32.7282	24.4722			-32.7282	18.4231
	2.08343	0.669477			2.08343	2.74596					-31.5517	23.4253			-31.5517	18.9641
	2.5525	0.548387			2.5525	2.70718					-30.8582	22.4804			-30.8582	19.4889
	4.38351	0.160779			4.38351	2.38998					-33.6128	21.8794			-33.6128	20.0908
	3.86143	-0.23686			3.86143	2.06515					-34.0865	21.4109			-34.0865	20.7623
	3.48633	-0.635042			3.48633	1.74046					-33.2493	20.9448			-33.2493	21.4311
	5.33812	0.387561			5.33812	1.92462					-34.8117	20.4218			-34.8117	22.0506
	5.89328	2.09836			5.89328	2.33604					-37.5818	19.6876			-37.5818	22.591
	4.28145	3.83693			4.28145	2.74211					-35.6625	18.9689			-35.6625	23.1274
	4.88797	4.70725			4.88797	3.48606					-35.6035	18.2794			-35.6035	23.6494
	2.58293	3.66076			2.58293	5.05008					-37.0252	19.3354			-37.0252	24.2961
	2.24408	2.64072			2.24408	6.61835					-37.0418	20.6513			-37.0418	24.9615
	4.60409	1.67035			4.60409	8.15274					-37.2733	21.9704			-37.2733	25.6255
	-0.755137	1.76144			-0.755137	8.22644					-41.998	4.17836			-41.998	25.502
	-2.12733	1.97311			-2.12733	8.16056					-42.2856	5.61798			-42.2856	24.9962
	-2.44952	2.21548			-2.44952	8.07761					-39.7776	7.34394			-39.7776	24.478
	-3.83864	2.73082			-3.83864	8.10397					-39.8027	9.31577			-39.8027	23.9588
	-5.05494	3.40785			-5.05494	8.23459					-37.1539	10.1015			-37.1539	23.5988
	-3.65024	4.01902			-3.65024	8.36189					-36.3466	10.2722			-36.3466	23.3015
	-5.12588	4.32548			-5.12588	8.3658					-39.3366	10.469			-39.3366	23.0001
	-7.13069	3.26544			-7.13069	7.74225					-37.6756	10.8568			-37.6756	22.7404
	-5.84042	2.23375			-5.84042	7.13342					-35.1404	11.7483			-35.1404	22.5694
	-2.27807	1.17554			-2.27807	6.50712					-36.4504	12.6952			-36.4504	22.3955
	-5.0609	0.702729			-5.0609	5.67279					-37.781	13.676			-37.781	22.2231
	-1.83271	0.389432			-1.83271	4.80765					-39.1048	13.5516			-39.1048	22.0713
	-2.15445	0.0640735			-2.15445	3.92516					-39.3576	13.2991			-39.3576	21.9209
	-1.03843	-0.314207			-1.03843	3.19314					-38.0912	13.0587			-38.0912	21.7724
	-0.73716	-0.74313			-0.73716	2.68422					-38.2301	13.5596			-38.2301	21.9898
	1.17664	-1.16782			1.17664	2.16188					-35.9199	14.7378			-35.9199	22.5476
	0.91125	-1.57463			0.91125	1.64259					-36.3649	15.8765			-36.3649	23.0896
	4.17336	-1.90101			4.17336	1.249					-37.1096	16.4081			-37.1096	23.6244
	4.86094	-2.23457			4.86094	0.844951					-37.9238	13.2016			-37.9238	24.0492
	4.91724	-2.56737			4.91724	0.44001					-38.6656	10.1865			-38.6656	24.463
	4.91922	-1.95946			4.91922	0.388083					-36.3333	7.23289			-36.3333	24.8858
	4.95619	-0.772461			4.95619	0.525042					-40.0756	9.11497			-40.0756	25.2243
	2.31141	0.471682			2.31141	0.660871					-39.0407	12.5178			-39.0407	25.5344
	3.97621	1.70245			3.97621	0.871881					-39.1723	16.1422			-39.1723	25.8576
	2.80417	2.86619			2.80417	1.31441					-40.5047	13.4444			-40.5047	27.1997
	1.89353	4.03509			1.89353	1.75769					-41.8542	13.4553			-41.8542	27.0242
	2.1267	5.18799			2.1267	2.19373					-40.0304	13.4667			-40.0304	26.8425
	2.34878	4.24988			2.34878	1.92059					-39.9089	13.7852			-39.9089	26.6654
	0.381131	3.05234			0.381131	1.54319					-40.1216	14.9824			-40.1216	26.5098
	1.64043	1.8917			1.64043	1.16099					-38.8042	16.2402			-38.8042	26.3481
	2.92331	1.18992			2.92331	0.623677					-39.2429	17.5288			-39.2429	26.1842
	2.84473	0.87313			2.84473	-0.0785078					-37.3013	17.6858			-37.3013	26.3212
	2.94691	0.559174			2.94691	-0.779282					-37.3583	17.6821			-37.3583	26.5041
	-1.39122	0.252302			-1.39122	-1.29036					-38.3772	17.6752			-38.3772	26.6861
	2.15537	-0.0696998			2.15537	-0.59968					-39.0026	18.2049			-39.0026	27.0406
	3.27732	-0.357101			3.27732	0.0980661					-37.5822	19.3209			-37.5822	27.5982
	0.928752	-0.604865			0.928752	0.786068					-39.8253	20.4281			-39.8253	28.1603
	3.66765	0.901684			3.66765	0.277312					-39.9706	21.1832			-39.9706	28.6703
	5.14824	3.13504			5.14824	-0.652069					-40.9706	19.0544			-40.9706	28.7931
	2.26823	5.46507			2.26823	-1.56511					-42.0022	16.9916			-42.0022	28.9083
	3.15141	6.90154			3.15141	-2.21595					-42.8215	15.0455			-42.8215	29.0135
	7.47784	6.48108			7.47784	-2.36957					-39.3193	16.5352			-39.3193	29.195
	5.37116	6.07094			5.37116	-2.52188					-42.0475	19.3509			-42.0475	29.4058
	6.08471	5.65117			6.08471	-2.68027					-44.5031	22.0783			-44.5031	29.6104
	6.47537	6.0286			6.47537	-2.894					-43.2213	23.5857			-43.2213	29.8007
	8.27412	6.43444			8.27412	-3.10036					-44.4783	21.17			-44.4783	30.2355
	7.49493	6.88231			7.49493	-3.30888					-44.0541	22.3435			-44.0541	31.2731
	7.98086	5.66242			7.98086	-3.90235					-44.6358	19.3388			-44.6358	29.5538
	12.1119	3.46352			12.1119	-4.73029					-43.3043	21.0798			-43.3043	29.2779
	12.0448	1.25357			12.0448	-5.5918					-43.4866	21.7405			-43.4866	29.0052
	11.7803	-0.434866			11.7803	-6.0758					-44.278	20.9292			-44.278	28.7774
	13.0608	-0.553925			13.0608	-5.32609					-44.4058	20.0936			-44.4058	28.544
	12.8048	-0.675848			12.8048	-4.57629					-44.1089	19.3201			-44.1089	28.3258
	13.9584	-0.79773			13.9584	-3.84388					-44.609	19.3363			-44.609	28.2893
	12.6662	-0.15689			12.6662	-3.65317					-44.6779	19.3738			-44.6779	28.2117
	11.2542	0.633578			11.2542	-3.54866					-44.5036	18.3009			-44.5036	28.0164
	13.0871	1.42668			13.0871	-3.44395					-42.8099	16.7531			-42.8099	27.7434
	9.99956	0.778221			9.99956	-3.13743					-41.3021	15.2633			-41.3021	27.4681
	9.9334	-1.39795			9.9334	-2.58437					-43.0235	14.6727			-43.0235	27.2996
	10.5638	-3.36217			10.5638	-2.03363					-42.1255	15.9544			-42.1255	27.3492
	7.20003	-5.13476			7.20003	-1.39176					-44.1319	18.5498			-44.1319	27.3839
	8.09773	-7.26898			8.09773	0.47542					-43.2038	19.7921			-43.2038	28.2582
	6.37486	-8.83296			6.37486	2.29536					-43.3938	22.1826			-43.3938	30.1166
	4.0654	-9.74129			4.0654	4.01649					-44.901	22.6414			-44.901	30.5531
	5.41799	-8.36535			5.41799	4.66404					-44.358	24.1938			-44.358	31.3888
	5.10529	-5.68223			5.10529	4.84182					-44.8388	24.3974			-44.8388	31.1536
	3.8421	-2.55166			3.8421	5.00689					-44.384	24.439			-44.384	30.9826
	4.32535	-0.464434			4.32535	5.30291					-44.3642	24.2094			-44.3642	30.9485
	0.730038	-1.51631			0.730038	5.87111					-44.1669	22.5529			-44.1669	31.4642
	2.50244	-2.47638			2.50244	6.41786					-42.8455	18.1965			-42.8455	32.3184
	0.382676	-3.39147			0.382676	6.97036					-44.4529	16.5888			-44.4529	32.5917
	1.90625	-2.89709			1.90625	6.40921					-44.5484	17.9069			-44.5484	34.1904
	1.0593	-2.08795			1.0593	5.79557					-42.8255	27.5272			-42.8255	28.1794
	0.559044	-1.07548			0.559044	5.20656					-43.2068	24.2266			-43.2068	26.6593
	1.1847	-0.827942			1.1847	5.55251					-44.0679	26.2876			-44.0679	25.6487
	0.912824	-1.27756			0.912824	6.60932					-42.2848	28.3066			-42.2848	24.6606
	-2.87096	-1.69365			-2.87096	7.63895					-41.3282	30.3797			-41.3282	23.6469
	-0.405693	-1.8426			-0.405693	8.43752					-39.2222	27.2998			-39.2222	22.7734
	-0.200351	-0.912967			-0.200351	8.16238					-38.0022	23.8887			-38.0022	21.9037
	-2.35688	0.00429183			-2.35688	7.88143					-36.6166	20.5346			-36.6166	21.0508
	-5.02364	0.950043			-5.02364	7.58199					-36.3222	19.7217			-36.3222	20.5349
	-4.73047	3.72001			-4.73047	8.78241					-36.7574	20.901			-36.7574	20.2854
	-5.72304	6.98469			-5.72304	10.3006					-34.5489	22.0544			-34.5489	20.034
	-7.82213	10.4829			-7.82213	11.8597					-36.078	23.0904			-36.078	19.8851
	-10.5085	14.4891			-10.5085	13.0169					-34.4976	23.5034			-34.4976	20.2229
	-12.3393	19.0162			-12.3393	13.639					-34.1508	23.8968			-34.1508	20.5542
	-12.9264	23.8755			-12.9264	14.2825					-36.3908	24.288			-36.3908	20.8935
	-15.6028	28.4114			-15.6028	14.8685					-36.0112	21.4781			-36.0112	20.6607
	-16.5617	25.4158			-16.5617	14.5444					-34.3197	18.2278			-34.3197	20.3033
	-15.8579	22.4174			-15.8579	14.2079					-34.0934	15.1664			-34.0934	19.9351
	-15.9217	19.4988			-15.9217	13.8667					-33.9178	12.0798			-33.9178	20.1853
	-15.3896	17.7123			-15.3896	13.5867					-34.9976	9.05795			-34.9976	21.1998
	-14.3075	16.4136			-14.3075	13.3243					-34.9356	6.39335			-34.9356	22.2384
	-13.7753	15.1679			-13.7753	13.0601					-35.8782	4.40265			-35.8782	23.2354
	-14.4075	13.9421			-14.4075	12.7479					-35.2946	5.64057			-35.2946	23.692
	-9.96956	12.5621			-9.96956	12.2946					-35.828	7.10555			-35.828	24.1595
	-11.9932	11.1892			-11.9932	11.8424					-36.3188	8.76187			-36.3188	24.6267
	-11.2729	9.8557			-11.2729	11.4021					-38.182	10.2274			-38.182	24.6893
	-9.86415	10.0428			-9.86415	10.0799					-39.3822	11.6095			-39.3822	24.5646
	-9.8534	10.4136			-9.8534	8.65413					-39.9556	12.9967			-39.9556	24.4435
	-6.65973	10.7926			-6.65973	7.25264					-40.372	14.1567			-40.372	24.3252
	-5.47964	10.2775			-5.47964	6.34458					-36.866	14.861			-36.866	24.1946
	-6.54216	8.95654			-6.54216	5.91704					-38.6333	15.5928			-38.6333	24.0622
	-5.25037	7.69			-5.25037	5.49612					-38.3348	16.3327			-38.3348	23.9311
	-5.03298	6.31161			-5.03298	5.02295					-39.3677	15.6593			-39.3677	24.6638
	-5.03684	4.40194			-5.03684	4.29899					-39.6305	14.8298			-39.6305	25.4791
	-1.35027	2.70768			-1.35027	3.56214					-36.8246	14.0199			-36.8246	26.2639
	-2.65598	1.15754			-2.65598	2.77805					-38.2968	14.2493			-38.2968	27.1762
	-3.55037	3.93906			-3.55037	2.32526					-41.2435	15.4608			-41.2435	28.1945
	-1.46843	8.64813			-1.46843	1.97236					-41.5452	16.6791			-41.5452	29.1915
	-1.68445	14.3583			-1.68445	1.59607					-41.7174	18.198			-41.7174	30.2351
	-2.3742	15.2656			-2.3742	1.45301					-43.1704	21.1673			-43.1704	31.4228
	-0.11105	8.23523			-0.11105	1.67851					-44.07	24.1341			-44.07	32.5765
	-0.0505416	1.58489			-0.0505416	1.9053					-44.573	27.2178			-44.573	33.7472
	-0.420901	-4.37906			-0.420901	2.10884					-40.8258	18.1408			-40.8258	25.0504
	2.80513	-0.638194			2.80513	1.16375					-40.7586	17.8215			-40.7586	24.332
	4.69678	3.33425			4.69678	0.204876					-38.3205	17.5116			-38.3205	23.6332
	4.82716	7.76566			4.82716	-0.820755					-40.2899	17.1948			-40.2899	22.9172
	2.36962	8.43912			2.36962	-0.696743					-37.5254	17.6599			-37.5254	22.9892
	4.51954	6.94369			4.51954	0.0741901					-38.189	18.1337			-38.189	23.0847
	2.3917	5.48734			2.3917	0.862716					-39.0197	18.6199			-39.0197	23.1865
	5.5517	4.39614			5.5517	1.59018					-37.7796	18.1658			-37.7796	23.5882
	4.01495	4.16242			4.01495	2.13166					-38.9971	17.1445			-38.9971	24.1783
	4.28644	3.92527			4.28644	2.68298					-38.9808	16.1644			-38.9808	24.7816
	2.50231	3.69032			2.50231	3.23086					-42.3253	12.3812			-42.3253	30.756
	2.97575	2.24865			2.97575	3.33293					-41.6362	11.7968			-41.6362	31.4189
	2.25318	0.700549			2.25318	3.37524					-40.7191	11.2212			-40.7191	32.0789
	3.27614	-0.744517			3.27614	3.41526					-43.454	10.6683			-43.454	32.7191
	0.660202	-1.71765			0.660202	3.5325					-42.5336	12.1845			-42.5336	32.8873
	3.2327	-2.33537			3.2327	3.70575					-41.9274	13.9821			-41.9274	33.0163
	1.56941	-2.95675			1.56941	3.84025					-42.1935	15.8416			-42.1935	33.1398
	4.89988	1.87189			4.89988	3.64758					-43.6404	18.0148			-43.6404	33.347
	5.73685	1.48791			5.73685	4.34757					-44.0729	20.426			-44.0729	33.6164
	5.8829	1.1126			5.8829	5.02962					-44.5654	22.8799			-44.5654	33.8731
	2.55836	0.726089			2.55836	5.72994					-44.4032	24.9868			-44.4032	34.1409
	5.37559	0.575494			5.37559	6.02164					-42.9807	24.7177			-42.9807	34.4565
	0.777162	0.434046			0.777162	6.29265					-43.9253	24.1336			-43.9253	35.0609
	-0.96807	0.287188			-0.96807	6.56948					-35.9467	25.1152			-35.9467	28.8595
	-2.65708	1.31137			-2.65708	6.93395					-37.1298	29.0811			-37.1298	27.7792
	-3.37862	3.08494			-3.37862	7.34655					-34.7736	33.0557			-34.7736	26.6938
	-4.6374	4.88744			-4.6374	7.76592					-35.7302	33.9474			-35.7302	25.9526
	-11.0473	13.2286			-11.0473	8.39687					-34.689	31.296			-34.689	25.5776
	-11.6568	14.1107			-11.6568	8.0325					-33.1023	28.6782			-33.1023	25.2021
	-11.049	14.9895			-11.049	7.65734					-33.9234	26.2648			-33.9234	24.8477
	-14.3625	15.8433			-14.3625	7.28125					-33.022	25.1623			-33.022	24.649
	-12.8537	13.6851			-12.8537	7.70031					-30.4674	24.0659			-30.4674	24.4466
	-11.3356	11.3546			-11.3356	8.18405					-30.7048	22.9781			-30.7048	24.2409
	-11.105	9.15625			-11.105	8.65571					-31.4208	24.576			-31.4208	24.2772
	-14.2055	6.9199			-14.2055	8.41416					-32.5587	27.337			-32.5587	24.4126
	-13.1328	4.73661			-13.1328	7.57179					-32.842	30.1282			-32.842	24.5481
	-9.78757	2.70366			-9.78757	6.74292					-32.903	31.8812			-32.903	24.7929
	-7.98558	0.916467			-7.98558	5.84403					-34.2989	31.5551			-34.2989	25.2821
	-7.50937	0.101706			-7.50937	4.73551					-34.3553	31.2014			-34.3553	25.7699
	-5.34133	-0.687829			-5.34133	3.65405					-34.4556	30.8254			-34.4556	26.2456
	-4.1086	-1.49027			-4.1086	2.54718					-34.5835	27.4255			-34.5835	26.3531
	-0.516573	-4.46094			-0.516573	2.00818					-33.8052	23.8386			-33.8052	26.4371
	-0.417904	-7.75692			-0.417904	1.61544					-34.4171	20.3466			-34.4171	26.5188
	-0.749374	-10.971			-0.749374	1.20301					-34.5466	18.1389			-34.5466	26.5826
	0.35606	-13.0734			0.35606	0.9238					-34.1955	16.9713			-34.1955	26.6311
	-1.46475	-13.7227			-1.46475	0.841303					-35.2954	15.8422			-35.2954	26.6778
	-1.37276	-14.2835			-1.37276	0.754847					-33.7824	15.1331			-33.7824	26.6955
	-6.31404	0.739709			-6.31404	8.9132					-31.5322	16.3428			-31.5322	26.583
	-7.98676	-1.40579			-7.98676	9.0792					-34.064	17.5796			-34.064	26.4686
	-5.49803	-3.37697			-5.49803	9.21767					-33.5509	18.9071			-33.5509	26.3464
	-6.94058	-3.89574			-6.94058	9.19866					-32.7821	18.3934			-32.7821	26.2485
	-5.31036	-2.79516			-5.31036	9.01927					-34.1822	17.4571			-34.1822	26.1591
	-5.45099	-1.57835			-5.45099	8.84074					-33.7967	16.4928			-33.7967	26.067
	-8.63423	-0.340867			-8.63423	8.63249					-33.791	15.8673			-33.791	26.291
	-4.20622	0.252278			-4.20622	8.00081					-32.5985	15.7399			-32.5985	26.9183
	-5.52469	0.867216			-5.52469	7.37033					-32.2821	15.6704			-32.2821	27.5605
	-5.20529	1.50257			-5.20529	6.74234					-34.9419	15.6961			-34.9419	28.2042
	-4.89734	0.656187			-4.89734	6.65319					-34.4297	16.3244			-34.4297	28.8671
	-6.62698	-0.70272			-6.62698	6.77729					-34.8821	16.9659			-34.8821	29.5383
	-6.70497	-1.91951			-6.70497	6.90195					-34.1789	17.6052			-34.1789	30.2015
	-6.36945	-2.59589			-6.36945	7.10802					-32.6986	17.9958			-32.6986	23.8448
	-5.81522	-2.48787			-5.81522	7.49699					-33.438	18.4311			-33.438	23.8861
	-6.14433	-2.42568			-6.14433	7.88516					-32.8861	18.8593			-32.8861	23.9189
	-5.12176	-2.406			-5.12176	8.26409					-32.6117	19.2744			-32.6117	23.9464
	-5.3945	-1.64976			-5.3945	8.07988					-32.1583	17.0163			-32.1583	24.1314
	-4.90119	-0.609223			-4.90119	7.85966					-31.4767	14.8517			-31.4767	24.3114
	-5.62184	0.628182			-5.62184	7.6436					-33.0138	12.6789			-33.0138	24.495
	-4.78835	1.65722			-4.78835	7.40478					-32.5031	13.022			-32.5031	24.9074
	-4.09676	2.40524			-4.09676	7.15214					-32.2493	14.7998			-32.2493	25.4283
	-3.06321	3.15758			-3.06321	6.905					-31.8955	16.6646			-31.8955	25.9478
	-1.16188	3.45398			-1.16188	6.56236					-34.2966	18.2124			-34.2966	26.3369
	-1.83417	1.62676			-1.83417	5.83715					-34.5611	18.7279			-34.5611	26.3776
	-3.3694	-0.142943			-3.3694	5.13173					-35.0577	19.2787			-35.0577	26.4197
	-4.74003	-1.94924			-4.74003	4.40879					-33.939	19.8558			-33.939	26.4625
	-3.53767	-1.76696			-3.53767	4.09295					-34.2328	18.3351			-34.2328	26.3738
	-1.43487	-1.12617			-1.43487	3.88047					-34.8109	16.4961			-34.8109	26.2596
	-2.24287	-0.462416			-2.24287	3.66275					-35.1518	14.6857			-35.1518	26.1409
	-3.95946	0.764854			-3.95946	3.64487					-35.4037	13.9744			-35.4037	26.1469
	-5.953	2.65781			-5.953	3.87375					-33.8039	14.3514			-33.8039	26.2867
	-3.13918	4.55858			-3.13918	4.09178					-35.381	14.7328			-35.381	26.4264
	-5.20462	6.28767			-5.20462	4.33392					-35.6221	15.3034			-35.6221	26.6216
	-5.42527	5.69711			-5.42527	5.27258					-38.9703	17.7201			-38.9703	27.3704
	-7.06065	5.08777			-7.06065	6.24044					-36.6725	20.1663			-36.6725	28.1144
	-8.46651	4.4738			-8.46651	7.21484					-38.271	22.5772			-38.271	28.8359
	-12.6885	4.83292			-12.6885	11.4386					-42.6818	23.8035			-42.6818	31.2368
	-11.0833	4.41836			-11.0833	10.4863					-42.7267	25.5777			-42.7267	31.032
	-11.4269	4.01619			-11.4269	9.55674					-40.1934	27.4416			-40.1934	30.8075
	-10.7841	3.62379			-10.7841	8.6168					-42.9687	29.1537			-42.9687	30.5487
	-10.8511	4.97304			-10.8511	8.88245					-42.379	28.5922			-42.379	30.0603
	-11.0227	6.37054			-11.0227	9.14266					-42.3511	28.0147			-42.3511	29.5528
	-10.2229	7.8839			-10.2229	9.41016					-42.0913	27.4349			-42.0913	29.0382
	-11.8018	7.42994			-11.8018	8.30568					-41.9584	27.6313			-41.9584	28.5479
	-11.2775	5.89156			-11.2775	6.45407					-37.8511	28.1513			-37.8511	28.0498
	-10.6163	4.37867			-10.6163	4.56283					-37.1484	28.6432			-37.1484	27.5501
	-7.66366	3.00924			-7.66366	3.18413					-37.3864	28.1324			-37.3864	26.9903
	-7.99763	1.91805			-7.99763	3.29162					-39.3488	25.3859			-39.3488	26.2505
	-5.98175	0.796767			-5.98175	3.40094					-40.3456	22.6733			-40.3456	25.506
	-5.08402	-0.334656			-5.08402	3.51016					-41.2728	20.064			-41.2728	24.7748
	-4.47431	0.560533			-4.47431	2.85075					-39.7894	21.2614			-39.7894	24.5491
	-3.55506	1.82238			-3.55506	2.06645					-35.5607	22.8104			-35.5607	24.3669
	-1.12488	3.14018			-1.12488	1.28488					-36.1433	24.352			-36.1433	24.1884
	0.363804	3.58446			0.363804	0.927496					-38.5577	24.9606			-38.5577	24.142
	-0.590966	3.09848			-0.590966	0.992029					-38.7097	24.7355			-38.7097	24.2095
	-0.539713	2.61423			-0.539713	1.05669					-36.4262	24.5139			-36.4262	24.2746
	-2.32136	2.03986			-2.32136	1.10279					-37.3478	24.0473			-37.3478	24.4255
	-1.73828	0.537308			-1.73828	0.986734					-37.7046	22.4051			-37.7046	24.9992
	-0.484328	-0.862642			-0.484328	0.860064					-37.8639	20.8285			-37.8639	25.5524
	0.493883	-2.13028			0.493883	0.725998					-38.0177	19.2478			-38.0177	26.1094
	3.58722	0.153131			3.58722	3.53866					-42.124	20.2063			-42.124	26.3981
	6.2192	-1.36456			6.2192	2.13933					-38.0476	21.8295			-38.0476	26.6128
	4.77821	-2.90581			4.77821	0.71662					-40.5177	23.5252			-40.5177	26.8315
	8.25487	-4.32176			8.25487	-0.518585					-40.8912	25.0891			-40.8912	27.2468
	8.96807	-4.40663			8.96807	0.270034					-41.7408	26.394			-41.7408	27.9185
	7.64402	-4.48805			7.64402	1.06867					-42.1537	27.7364			-42.1537	28.6033
	7.86459	-4.56395			7.86459	1.85795					-42.2808	28.9295			-42.2808	29.2803
	9.54195	-4.61221			9.54195	1.90585					-42.9373	26.3097			-42.9373	29.9249
	8.63818	-4.6689			8.63818	1.63325					-43.4962	23.7628			-43.4962	30.5776
	8.49886	-4.7484			8.49886	1.36068					-44.5724	21.3617			-44.5724	31.221
	8.23847	-4.45752			8.23847	0.948119					-43.3075	20.2864			-43.3075	33.2612
	9.772	-3.18151			9.772	0.194545					-43.6599	14.4126			-43.6599	29.5868
	8.75322	-1.78878			8.75322	-0.547022					-43.0175	17.7596			-43.0175	29.543
	9.22214	-0.319498			9.22214	-1.25966					-44.7121	20.5374			-44.7121	29.1685
	8.12677	-1.46581			8.12677	-0.952107					-43.6575	18.8883			-43.6575	28.9895
	7.32412	-2.82993			7.32412	-0.558327					-39.5046	19.8255			-39.5046	28.9111
	8.73834	-4.15372			8.73834	-0.174199					-41.0521	20.7716			-41.0521	28.8342
	8.97114	-4.5346			8.97114	-0.186678					-41.3523	21.3631			-41.3523	28.749
	7.65485	-4.11732			7.65485	-0.540192					-40.6222	20.2509			-40.6222	28.6342
	7.16466	-3.72951			7.16466	-0.886452					-40.8287	19.1648			-40.8287	28.5151
	12.5171	-3.20033			12.5171	-1.29016					-41.292	18.0522			-41.292	28.3862
	9.20276	-1.89606			9.20276	-1.95641					-41.2185	21.7105			-41.2185	28.3061
	8.06079	-0.59729			8.06079	-2.62805					-41.7561	26.4982			-41.7561	28.2391
	8.66252	0.754993			8.66252	-3.33514					-41.1322	31.5626			-41.1322	28.17
	12.8678	-0.064908			12.8678	-3.13558					-41.1922	33.86			-41.1922	28.2151
	7.91228	-1.40248			7.91228	-2.70158					-39.8932	32.4711			-39.8932	28.3951
	7.83908	-2.73471			7.83908	-2.25664					-42.0517	31.0414			-42.0517	28.5677
	5.47596	-3.60089			5.47596	-1.68225					-41.9446	29.6316			-41.9446	28.6902
	6.74372	-3.82579			6.74372	-0.942541					-40.2802	28.6602			-40.2802	28.2141
	4.62593	-4.03215			4.62593	-0.17634					-40.411	27.6646			-40.411	27.7283
	5.70973	-4.11602			5.70973	0.601494					-41.2188	26.6685			-41.2188	27.2445
	1.08671	-1.65565			1.08671	1.56623					-42.8671	25.7041			-42.8671	27.6826
	0.630836	0.888881			0.630836	2.56706					-41.7445	24.7198			-41.7445	28.5744
	-3.22567	3.45557			-3.22567	3.5788					-41.7441	23.7301			-41.7441	29.4617
	-2.04725	4.8964			-2.04725	4.19969					-41.8278	23.6			-41.8278	30.262
	-2.53919	5.71559			-2.53919	4.605					-40.1209	25.6043			-40.1209	30.9298
	-2.41388	6.55574			-2.41388	5.02663					-40.0579	27.6321			-40.0579	31.5922
	-0.0349043	6.72367			-0.0349043	5.50514					-40.1326	29.632			-40.1326	32.2336
	-3.26623	5.32372			-3.26623	6.10573					-43.2382	31.5068			-43.2382	32.7026
	-3.43744	4.09512			-3.43744	6.72596					-43.7745	33.3876			-43.7745	33.1397
	-4.24651	3.08428			-4.24651	7.35128					-43.4355	35.2371			-43.4355	33.5519
	-4.4569	2.8449			-4.4569	7.83366					-41.8178	34.6017			-41.8178	33.9851
	-3.4013	2.72611			-3.4013	8.31304					-41.1954	31.6837			-41.1954	34.4353
	-3.49522	2.66794			-3.49522	8.79251					-43.3685	28.8573			-43.3685	34.8737
	-1.99852	2.465			-1.99852	9.57682					-42.9363	25.7252			-42.9363	35.3045
	-2.29016	2.09097			-2.29016	10.6846					-42.708	21.1736			-42.708	35.6353
	-1.09694	1.74364			-1.09694	11.7863					-42.4271	16.7547			-42.4271	35.9636
	10.4031	1.55065			10.4031	4.23557					-43.9609	24.0354			-43.9609	28.3006
	8.05839	0.1661			8.05839	3.43399					-43.1258	22.3449			-43.1258	28.0835
	7.40727	-1.23248			7.40727	2.61641					-42.9612	20.701			-42.9612	27.8731
	7.51182	-2.61146			7.51182	1.80254					-43.5203	19.0144			-43.5203	27.658
	14.5025	-1.41791			14.5025	1.3508					-43.7605	18.3909			-43.7605	27.5671
	15.2543	0.370954			15.2543	0.948258					-43.2087	17.8072			-43.2087	27.4824
	14.2935	2.29994			14.2935	0.547201					-42.738	17.2111			-42.738	27.3969
	14.4572	2.65467			14.4572	0.143881					-42.6848	15.1332			-42.6848	27.4604
	14.4684	1.14985			14.4684	-0.284486					-44.3255	12.2323			-44.3255	27.6184
	7.11121	-0.30519			7.11121	-0.713082					-43.4131	9.38542			-43.4131	27.7805
	15.0645	-1.43841			15.0645	-1.13168					-43.6677	7.80845			-43.6677	27.9251
	15.3993	0.175677			15.3993	-1.54979					-42.5222	10.2921			-42.5222	28.0072
	18.2885	1.82078			18.2885	-1.96531					-41.8957	12.8574			-41.8957	28.0854
	19.1886	3.50458			19.1886	-2.37993					-41.6732	15.6182			-41.6732	28.1634
	19.0114	2.96731			19.0114	-2.72329					-41.7749	15.3843			-41.7749	27.3579
	19.9649	1.53619			19.9649	-3.04892					-42.0638	14.6115			-42.0638	26.3973
	18.6064	0.101984			18.6064	-3.37258					-42.4114	13.825			-42.4114	25.4096
	20.7718	-1.42966			20.7718	-3.77306					-42.4244	14.2455			-42.4244	24.44
	23.565	-3.22418			23.565	-4.35355					-42.4847	15.9629			-42.4847	23.5033
	24.7238	-4.9948			24.7238	-4.93357					-42.1734	17.6827			-42.1734	22.5421
	25.1267	-6.69891			25.1267	-5.49817					-42.3774	19.3198			-42.3774	21.6607
	21.9539	-6.72221			21.9539	-6.231					-41.2139	20.5273			-41.2139	21.5804
	18.6286	-6.6373			18.6286	-6.96855					-40.5279	21.7759			-40.5279	21.4969
	17.8246	-6.54371			17.8246	-7.68467					-39.2693	23.0431			-39.2693	21.4117
	25.9812	-7.32031			25.9812	-8.13239					-39.3622	23.7458			-39.3622	21.4731
	22.5847	-8.76892			22.5847	-8.36386					-31.2034	24.2399			-31.2034	21.5996
	24.7102	-10.1912			24.7102	-8.5894					-37.6098	24.7433			-37.6098	21.7289
	24.9978	-11.3071			24.9978	-8.95517					-34.7786	6.37844			-34.7786	22.5017
	25.0259	-10.9485			25.0259	-9.88757					-35.8467	6.87742			-35.8467	23.1906
	25.3857	-10.5831			25.3857	-10.7971					-36.0692	7.3701			-36.0692	23.8597
	28.226	-10.1932			28.226	-11.728					-42.968	32.0804			-42.968	27.6571
	29.061	-13.1944			29.061	-12.1223					-43.7607	34.7073			-43.7607	27.6182
	30.8781	-16.7457			30.8781	-12.3884					-41.888	19.8169			-41.888	28.7738
	29.1871	-20.2682			29.1871	-12.6607					-42.3594	21.042			-42.3594	28.8406
	27.5069	-22.0459			27.5069	-13.3302					-42.1278	22.294			-42.1278	28.9086
	28.817	-21.6512			28.817	-14.49					-41.4019	23.5426			-41.4019	28.9762
	30.7077	-21.2255			30.7077	-15.6853					-42.5554	22.6983			-42.5554	29.3749
	30.6092	-20.7962			30.6092	-16.8147					-44.3369	6.56816			-44.3369	27.5735
	34.7063	-20.6325			34.7063	-16.7958					-44.742	11.8899			-44.742	27.1949
	35.0123	-20.453			35.0123	-16.7751					-44.7097	10.5661			-44.7097	27.1405
	34.4291	-20.2617			34.4291	-16.7532					-44.2919	22.0066			-44.2919	30.2763
	39.116	-20.1445			39.116	-17.7815					-44.2497	18.8969			-44.2497	30.4151
	39.1167	-20.0517			39.1167	-19.353					-42.2722	15.85			-42.2722	30.5559
	40.7096	-19.9455			40.7096	-20.9295					-43.1623	14.8338			-43.1623	30.6669
	41.7952	-20.3412			41.7952	-22.3939					-42.6387	13.8549			-42.6387	30.7735
	42.6681	-22.0342			42.6681	-23.712					-41.8415	12.8599			-41.8415	30.8813
	43.2852	-23.7225			43.2852	-25.0318					-41.8145	13.3495			-41.8145	30.9498
	43.0089	-25.3703			43.0089	-26.3218					-41.6603	14.6096			-41.6603	30.9913
	45.1751	-27.1952			45.1751	-27.5441					-40.7613	15.9258			-40.7613	31.0268
	48.3821	-29.0615			48.3821	-28.7717					-40.1791	16.8847			-40.1791	30.9952
	44.9875	-30.9061			44.9875	-29.9795					-40.2459	16.8458			-40.2459	30.806
	48.2973	-30.8146			48.2973	-30.3418					-40.2329	16.8066			-40.2329	30.6112
	45.9069	-28.918			45.9069	-29.9009					-41.4093	16.7679			-41.4093	30.4153
	46.6636	-27.0699			46.6636	-29.4678					-41.7898	16.2968			-41.7898	30.2907
	47.2327	-24.8846			47.2327	-28.9688					-42.1318	15.7667			-42.1318	30.1698
	47.3583	-21.0707			47.3583	-28.1657					-42.8595	15.2421			-42.8595	30.0476
	46.9257	-17.2472			46.9257	-27.3553					-42.598	14.4748			-42.598	30.0219
	49.5965	-13.4641			49.5965	-26.5571					-42.6215	13.4354			-42.6215	30.088
	43.921	-16.3646			43.921	-22.6221					-42.6204	12.4007			-42.6204	30.152
	42.2472	-20.4474			42.2472	-17.8266					-42.9242	11.5441			-42.9242	30.2368
	41.5134	-23.4334			41.5134	-13.2581					-42.1076	11.7916			-42.1076	30.5059
	45.8554	-23.1493			45.8554	-10.3162					-40.3313	12.0494			-40.3313	30.7753
	42.2208	-19.3433			42.2208	-9.87258					-40.2544	12.3113			-40.2544	31.0393
	44.1905	-15.6966			44.1905	-9.43494					-40.2291	14.3211			-40.2291	31.0405
	42.2463	-12.0443			42.2463	-8.98001					-39.4589	17.0101			-39.4589	30.9462
	36.6992	-12.472			36.6992	-8.39224					-38.9623	19.7286			-38.9623	30.8512
	37.1888	-12.8974			37.1888	-7.79472					-37.5769	22.0002			-37.5769	30.8031
	34.5868	-13.3397			34.5868	-7.16114					-35.8174	23.2918			-35.8174	30.8367
	34.3974	-13.8756			34.3974	-6.62952					-36.2747	24.5679			-36.2747	30.8601
	28.4532	-14.4392			28.4532	-6.13408					-37.6301	25.8978			-37.6301	30.8756
	29.7096	-15.0021			29.7096	-5.58108					-37.6038	25.1017			-37.6038	30.7478
	-3.5935	6.99122			-3.5935	7.5238					-36.3824	24.2764			-36.3824	30.6154
	-2.72482	5.33924			-2.72482	7.24725					-35.6728	23.473			-35.6728	30.4838
	-4.65078	3.72124			-4.65078	6.96464					-34.6963	21.4005			-34.6963	30.3478
	-5.88922	2.17938			-5.88922	6.68275					-34.172	18.5647			-34.172	30.209
	-0.472421	-2.94391			-0.472421	4.39808					-35.1563	15.8491			-35.1563	30.0692
	-0.0662631	-2.5055			-0.0662631	4.73964					-35.3376	14.0391			-35.3376	29.8564
	-1.21222	-2.03894			-1.21222	5.07405					-35.4208	15.3402			-35.4208	29.4126
	-1.75176	-1.51967			-1.75176	5.41968					-35.2564	16.613			-35.2564	28.9594
	-1.34604	-1.02795			-1.34604	5.2062					-36.1951	17.9196			-36.1951	28.4736
	-3.0764	-0.546926			-3.0764	4.98658					-36.2734	18.0748			-36.2734	28.0216
	-2.59589	-0.0500383			-2.59589	4.76045					-36.5285	18.0316			-36.5285	27.5906
	-3.56598	1.614			-3.56598	4.79994					-36.8168	17.9864			-36.8168	27.152
	-4.13463	4.10362			-4.13463	5.01033					-34.9023	16.2981			-34.9023	27.1171
	-3.92982	6.79853			-3.92982	5.22518					-35.3297	12.9851			-35.3297	27.5201
	-2.76945	8.32893			-2.76945	5.29494					-36.6674	9.77038			-36.6674	27.9361
	-3.39884	5.44114			-3.39884	4.86305					-36.3395	8.16294			-36.3395	28.355
	-6.23694	2.72842			-6.23694	4.4388					-34.2799	19.814			-34.2799	28.7383
	-6.9768	0.0556068			-6.9768	4.00153					-35.1272	32.3376			-35.1272	29.0817
	-6.76296	0.823515			-6.76296	5.19066					-37.3589	45.1811			-37.3589	29.375
	-5.53474	2.17575			-5.53474	6.48503					-38.8266	44.1906			-38.8266	29.6315
	-5.27256	3.55979			-5.27256	7.63974					-38.9623	37.7524			-38.9623	29.8926
	-5.13287	4.14535			-5.13287	8.34274					-39.9449	31.5596			-39.9449	30.1516
	-5.63311	3.88451			-5.63311	8.64203					-40.3202	27.9104			-40.3202	30.2691
	-4.11232	3.68973			-4.11232	8.90767					-41.0413	28.771			-41.0413	30.108
	-5.61547	3.48071			-5.61547	9.07649					-39.8844	29.6265			-39.8844	29.9489
	-3.4533	2.47081			-3.4533	8.67639					-41.7266	30.4546			-41.7266	29.7957
	-3.72619	1.45529			-3.72619	8.26882					-36.9825	27.8277			-36.9825	30.2122
	-6.21007	0.452392			-6.21007	7.86109					-43.8671	25.0347			-43.8671	30.6543
	-6.14802	-0.348487			-6.14802	7.68727					-44.0565	22.3654			-44.0565	31.0746
	-7.16282	-1.12081			-7.16282	7.60028					-43.8955	20.1208			-43.8955	31.2781
	-6.52704	-1.92417			-6.52704	7.50841					-42.7408	18.2642			-42.7408	31.3089
	-6.19377	9.55252			-6.19377	5.42873					-44.1098	16.5075			-44.1098	31.3357
	-5.79626	8.81486			-5.79626	4.75164					-44.4025	16.0408			-44.4025	31.0518
	-4.98646	8.09777			-4.98646	4.03754					-33.4847	21.0817			-33.4847	20.4262
	11.9673	5.20789			11.9673	3.75146					-33.4999	21.4775			-33.4999	20.4389
	11.1846	1.12095			11.1846	3.04945					-33.492	21.8821			-33.492	20.4477
	13.9663	-2.67337			13.9663	2.33697					-33.4591	20.748			-33.4591	20.5403
	13.0602	-5.86261			13.0602	1.71459					-34.27	18.5839			-34.27	20.691
	13.5251	-7.0137			13.5251	1.77544					-36.6604	16.5166			-36.6604	20.8375
	12.7759	-8.15685			12.7759	1.83794					-36.4034	15.677			-36.4034	20.9638
	13.8871	-9.26436			13.8871	1.9006					-34.3006	19.5358			-34.3006	21.0088
	17.0384	4.17551			17.0384	10.2828					-32.9553	23.6011			-32.9553	21.0524
	15.6931	4.12376			15.6931	9.4488					-32.9868	28.0264			-32.9868	21.0967
	15.551	4.07064			15.551	8.62402					-33.1415	28.3961			-33.1415	21.1721
	12.5491	4.01746			12.5491	7.82764					-33.1023	27.9408			-33.1023	21.2508
	12.4697	3.17013			12.4697	7.67627					-34.4767	27.4616			-34.4767	21.3306
	13.5902	2.14273			13.5902	7.71273					-35.6982	26.4463			-35.6982	21.1525
	17.0222	1.19108			17.0222	7.74789					-35.8158	24.8777			-35.8158	20.6816
	17.6071	0.753313			17.6071	7.6576					-35.8272	23.3049			-35.8272	20.1969
	14.1145	1.05847			14.1145	7.37889					-37.176	21.6848			-37.176	19.7588
	16.2342	1.36188			16.2342	7.10655					-33.5933	19.2031			-33.5933	19.8625
	18.6265	1.71915			18.6265	6.83781					-32.5842	16.7932			-32.5842	19.9478
	18.6605	4.00557			18.6605	7.03795					-31.175	14.5277			-31.175	20.0119
	19.1322	6.41576			19.1322	7.2303					-28.6491	18.019			-28.6491	19.5194
	16.8523	9.04432			16.8523	7.42307					-29.2341	18.4362			-29.2341	19.5423
	15.7058	9.67099			15.7058	7.26779					-29.2344	18.8591			-29.2344	19.5653
	14.5017	9.138			14.5017	6.93359					-29.2521	19.2766			-29.2521	19.588
	14.3739	8.58833			14.3739	6.59699					-30.6866	17.9893			-30.6866	19.3903
	14.8995	7.61719			14.8995	6.3537					-29.8332	16.3053			-29.8332	19.1361
	15.5593	5.63468			15.5593	6.35123					-30.5995	14.728			-30.5995	18.8906
	14.4656	3.7162			14.4656	6.34876					-31.7703	12.8821			-31.7703	18.8088
	15.3819	1.91498			15.3819	6.3464					-32.6544	10.6838			-32.6544	18.9645
	15.2508	-2.42892			15.2508	1.64034					-28.1897	8.62044			-28.1897	19.1122
	16.853	-3.61981			16.853	0.79417					-28.1622	6.72188			-28.1622	19.2627
	17.764	-4.83231			17.764	-0.0707058					-35.7431	8.57325			-35.7431	19.4818
	19.2966	-6.27777			19.2966	-0.550808					-34.6802	10.4381			-34.6802	19.6954
	23.3319	-8.02305			23.3319	-0.514214					-34.509	12.4024			-34.509	19.9138
	23.2121	-9.69525			23.2121	-0.479287					-33.9503	13.713			-33.9503	20.1436
	17.8204	-3.20761			17.8204	-0.277578					-33.8309	14.6487			-33.8309	20.3749
	16.5793	-3.3865			16.5793	-0.00423835					-33.7775	15.6158			-33.7775	20.6129
	17.4769	-3.54455			17.4769	0.276358					-33.7956	16.1768			-33.7956	20.9166
	18.981	-3.67639			18.981	0.557587					-33.703	15.69			-33.703	21.3783
	15.0609	-3.09433			15.0609	0.883534					-33.6909	15.1975			-33.6909	21.8562
	17.0122	-2.43495			17.0122	1.2224					-34.2696	14.7114			-34.2696	22.339
	17.0728	-1.77678			17.0728	1.56342					-34.7421	16.5827			-34.7421	22.4914
	27.2458	-5.29829			27.2458	0.552445					-34.564	18.9275			-34.564	22.6063
	26.7598	-5.42767			26.7598	0.284959					-35	21.4507			-35	22.717
	29.169	-5.56147			29.169	0.0143348					-35.374	19.2142			-35.374	22.8412
	28.0542	-5.69632			28.0542	-0.252811					-36.3362	12.794			-36.3362	22.9867
	27.642	-6.01632			27.642	-0.731201					-36.4966	7.17306			-36.4966	23.1325
	27.3348	-6.32993			27.3348	-1.21958					-36.0992	3.42243			-36.0992	23.2664
	28.3821	-6.6232			28.3821	-1.69789					-37.3661	5.80696			-37.3661	23.3436
	26.4434	-4.06802			26.4434	-1.957					-36.9533	8.38602			-36.9533	23.4197
	25.801	0.871906			25.801	-2.04845					-36.6504	11.067			-36.6504	23.4929
	25.5527	6.14854			25.5527	-2.13536					-39.2142	15.2918			-39.2142	25.2444
	26.576	10.1037			26.576	-2.19933					-39.6097	16.687			-39.6097	24.9047
	25.9471	6.79486			25.9471	-2.17411					-39.5036	18.0929			-39.5036	24.5654
	25.4947	3.71192			25.4947	-2.14943					-38.1351	17.6842			-38.1351	24.4099
	25.49	0.700595			25.49	-2.12408					-37.5187	16.1575			-37.5187	24.3662
	25.6089	0.875793			25.6089	-2.94481					-38.7244	14.7354			-38.7244	24.3122
	27.1008	1.70788			27.1008	-3.91879					-19.1754	17.3164			-19.1754	21.4076
	27.7009	2.58993			27.7009	-4.91264					-19.9596	16.8055			-19.9596	21.3596
	28.3734	2.01189			28.3734	-5.44294					-20.0127	16.3164			-20.0127	21.3076
	27.1857	-0.287907			27.1857	-5.4141					-19.9705	15.8283			-19.9705	21.2493
	27.1346	-2.5922			27.1346	-5.38403					-19.1899	15.3677			-19.1899	21.4369
	28.9832	-4.7858			28.9832	-5.37532					-13.4122	14.9203			-13.4122	21.6565
	29.2403	-6.11505			29.2403	-5.62789					-14.4649	14.4571			-14.4649	21.882
	32.2526	-7.47862			32.2526	-5.88723					-15.1031	14.2196			-15.1031	21.9478
	33.2109	-8.8365			33.2109	-6.14562					-19.5281	14.2187			-19.5281	21.8506
	32.8636	-10.3878			32.8636	-6.92206					-18.7799	14.2177			-18.7799	21.7505
	32.3826	-12.0636			32.3826	-7.9608					-21.2352	14.2909			-21.2352	21.6013
	32.2417	-13.7134			32.2417	-8.99671					-21.2732	14.9645			-21.2732	21.0755
	37.0411	-13.7478			37.0411	-9.6888					-23.3062	15.6949			-23.3062	20.5393
	37.7538	-9.96511			37.7538	-9.64383					-23.2207	16.4651			-23.2207	20.0054
	39.4336	-5.98785			39.4336	-9.59901					-17.8503	16.9181			-17.8503	20.1259
	39.5732	-1.89027			39.5732	-9.55542					-17.3579	17.2526			-17.3579	20.487
	39.9476	-3.14553			39.9476	-9.60967					-17.1119	17.5821			-17.1119	20.8363
	39.8442	-4.9052			39.8442	-9.67385					-21.8514	17.3656			-21.8514	21.067
	39.5558	-6.66165			39.5558	-9.73905					-21.8089	16.0761			-21.8089	21.1014
	39.653	-7.93011			39.653	-9.81468					-22.0229	14.7826			-22.0229	21.1347
	39.4376	-8.81505			39.4376	-9.9013					-22.1081	13.5166			-22.1081	21.1662
	38.9211	-9.64345			38.9211	-9.98768					-22.0762	12.3339			-22.0762	20.9901
	38.9278	-10.3986			38.9278	-10.1159					-21.2206	11.1861			-21.2206	20.8094
	39.2715	-11.1335			39.2715	-10.4763					-21.5209	10.0934			-21.5209	20.638
	40.8895	-11.8697			40.8895	-10.8357					-20.3223	9.90536			-20.3223	20.5683
	40.9661	-12.5912			40.9661	-11.1863					-18.0171	10.376			-18.0171	20.573
	42.1053	-14.6437			42.1053	-11.6506					-18.8803	10.839			-18.8803	20.5783
	45.7815	-17.0383			45.7815	-12.1461					-18.6554	10.8386			-18.6554	20.6225
	46.5536	-19.3642			46.5536	-12.6315					-20.8979	8.98529			-20.8979	20.8191
	44.9949	-19.8448			44.9949	-12.8606					-21.3226	7.25415			-21.3226	21.0095
	48.6572	-15.2784			48.6572	-12.5452					-21.2404	5.55564			-21.2404	21.2041
	49.0056	-13.2071			49.0056	-4.08119					-19.1987	6.74894			-19.1987	21.3301
	49.7429	-3.93229			49.7429	-6.78181					-19.1744	8.67965			-19.1744	21.4373
	41.0777	-2.5767			41.0777	-6.08729					-19.1247	10.8506			-19.1247	21.5457
	34.9364	-2.71733			34.9364	-5.1367					-19.8976	12.4189			-19.8976	21.7531
	32.6925	-2.87114			32.6925	-4.15233					-19.8381	13.0473			-19.8381	22.0765
	37.6452	-2.89909			37.6452	-1.74457					-20.1146	13.7073			-20.1146	22.409
	37.8026	-2.7788			37.8026	0.84742					-20.8107	14.2838			-20.8107	22.7238
	36.5333	-2.5156			36.5333	3.40037					-21.201	13.5227			-21.201	22.7815
	35.5598	-2.56938			35.5598	4.80104					-22.0639	12.7419			-22.0639	22.8394
	34.8117	-2.96843			34.8117	4.79879					-23.4226	11.9551			-23.4226	22.8964
	32.8999	-3.06161			32.8999	4.80771					-23.8007	12.6397			-23.8007	23.1004
	-21.378	9.29446			-21.378	17.916					-22.5189	13.9458			-22.5189	23.3631
	-21.4072	8.46067			-21.4072	17.3035					-22.4109	15.2665			-22.4109	23.63
	-21.3854	7.63361			-21.3854	16.7021					-22.8755	15.7312			-22.8755	23.7603
	-21.2887	8.40839			-21.2887	16.1972					-22.1986	14.3906			-22.1986	23.5968
	-20.3397	10.351			-20.3397	15.7699					-21.8692	13.0467			-21.8692	23.429
	-23.6416	12.3176			-23.6416	15.3504					-23.5028	11.7337			-23.5028	23.261
	-21.8972	13.1066			-21.8972	14.965					-24.8319	13.1945			-24.8319	23.3648
	-20.7902	9.38122			-20.7902	14.7404					-25.4272	14.9225			-25.4272	23.4906
	-19.6436	6.07321			-19.6436	14.5212					-25.402	16.68			-25.402	23.6161
	-19.6958	3.0378			-19.6958	14.2966					-25.1343	17.8167			-25.1343	23.6861
	-20.1773	1.92488			-20.1773	13.9671					-25.2662	18.4711			-25.2662	23.7151
	-19.6277	1.1779			-19.6277	13.6236					-24.6377	19.1247			-24.6377	23.7465
	-18.652	0.422166			-18.652	13.2683					-27.6102	19.7772			-27.6102	23.8068
	-19.8001	0.7549			-19.8001	13.54					-28.0031	20.5067			-28.0031	24.0149
	-19.9326	2.33686			-19.9326	14.5316					-29.0302	21.2356			-29.0302	24.2223
	-19.8966	3.97816			-19.8966	15.5508					-29.0853	21.9447			-29.0853	24.4238
	-18.9892	5.68581			-18.9892	16.3809					-29.0332	21.6186			-29.0332	24.6561
	-18.6376	7.95349			-18.6376	15.0283					-28.8342	21.002			-28.8342	24.8941
	-19.333	10.3895			-19.333	13.631					-28.8849	20.4111			-28.8849	25.1248
	-19.8602	12.9372			-19.8602	12.2226					-28.8886	19.6797			-28.8886	25.3666
	-16.874	3.83166			-16.874	12.416					-28.3105	18.7854			-28.3105	25.6182
	-17.4558	3.01845			-17.4558	12.789					-28.3856	17.9639			-28.3856	25.8628
	-17.271	2.20561			-17.271	13.1624					-33.9236	24.32			-33.9236	25.8765
	-17.2894	1.41398			-17.2894	13.5267					-35.3809	23.9664			-35.3809	25.7544
	-18.1992	2.63124			-18.1992	13.7623					-36.7401	23.6074			-36.7401	25.6293
	-19.07	4.41574			-19.07	13.962					-34.5576	19.6127			-34.5576	21.2919
	-18.8907	6.18794			-18.8907	14.1582					-34.6391	20.3967			-34.6391	21.8988
	-17.7638	8.04792			-17.7638	14.0263					-34.8477	21.1699			-34.8477	22.4934
	-18.7738	10.0039			-18.7738	13.4154					-34.0719	21.9744			-34.0719	23.1082
	-14.5272	12.0057			-14.5272	12.8193					-34.0046	20.9632			-34.0046	23.589
	-15.2806	14.019			-15.2806	12.2362					-35.8056	19.6815			-35.8056	24.0343
	-17.769	12.227			-17.769	12.4889					-35.9403	18.3361			-35.9403	24.4857
	-19.7227	10.5594			-19.7227	12.7371					-36.4452	17.0763			-36.4452	24.815
	-18.6981	8.93458			-18.6981	12.993					-34.5126	15.95			-34.5126	25.0163
	-19.1395	7.92822			-19.1395	12.8909					-35.8192	14.7893			-35.8192	25.2202
	-19.2634	7.24788			-19.2634	12.6088					-33.463	13.9754			-33.463	25.3869
	-19.2479	6.57016			-19.2479	12.3208					-35.9319	15.7974			-35.9319	25.2901
	-19.2228	6.24683			-19.2228	12.0897					-35.056	17.7009			-35.056	25.1854
	-15.4684	6.78201			-15.4684	12.0079					-35.6882	19.6384			-35.6882	25.0748
	-15.561	7.33393			-15.561	11.9299					-44.4155	28.171			-44.4155	32.992
	-16.251	7.88957			-16.251	11.8576					-43.7312	31.0861			-43.7312	33.6796
	-15.9564	5.30681			-15.9564	11.1903					-44.6475	34.0678			-44.6475	34.3672
	-16.1709	2.37401			-16.1709	10.4414					-44.4955	30.6963			-44.4955	35.8029
	-15.5473	-0.506438			-15.5473	9.69036					-44.8322	23.3662			-44.8322	40.5818
	-15.9002	0.946423			-15.9002	9.35791					-43.705	29.4813			-43.705	40.889
	-15.5759	6.98561			-15.5759	9.40568					-43.5784	35.5316			-43.5784	41.0241
	-15.4414	13.6831			-15.4414	9.45394					-44.5549	41.2815			-44.5549	40.9821
	-12.3109	19.4784			-12.3109	9.53744					-35.032	17.8731			-35.032	22.9795
	-12.6075	16.2155			-12.6075	9.87362					-35.7338	18.3697			-35.7338	23.2123
	-13.4296	13.129			-13.4296	10.21					-35.6311	18.8454			-35.6311	23.4452
	-14.0695	10.2931			-14.0695	10.5379					-34.8983	19.2885			-34.8983	23.679
	-16.9845	11.8644			-16.9845	14.5974					-36.3932	19.619			-36.3932	23.8875
	-17.8183	10.6728			-17.8183	15.3047					-37.4317	19.9414			-37.4317	24.099
	-17.8706	9.54101			-17.8706	16.0005					-40.4701	20.2714			-40.4701	24.3238
	-20.1303	10.1475			-20.1303	15.5869					-41.0588	21.5751			-41.0588	24.7796
	-18.8516	11.8822			-18.8516	14.4673					-40.2448	23.013			-40.2448	25.2697
	-17.7199	13.6206			-17.7199	13.3758					-38.2938	24.5033			-38.2938	25.7833
	-30.2719	8.2047			-30.2719	16.9287					-38.0042	24.9608			-38.0042	26.1679
	-31.5943	8.93178			-31.5943	17.7835					-37.6637	24.341			-37.6637	26.4029
	-32.4717	9.64753			-32.4717	18.6222					-37.6135	23.7142			-37.6135	26.643
	-32.4393	10.3824			-32.4393	19.4803					-37.4974	23.4066			-37.4974	26.874
	-32.3598	11.0409			-32.3598	19.3249					-38.6316	25.575			-38.6316	27.0373
	-32.966	11.6591			-32.966	19.0219					-40.3954	27.8524			-40.3954	27.21
	-35.7193	12.2832			-35.7193	18.71					-40.9343	30.1864			-40.9343	27.3883
	-34.4207	12.4756			-34.4207	18.4029					-40.0768	31.1815			-40.0768	28.4399
	-33.4294	12.2307			-33.4294	18.1086					-40.0917	31.7064			-40.0917	29.8564
	-28.1128	11.9728			-28.1128	17.8068					-43.8923	32.2329			-43.8923	31.2706
	-29.2199	11.5731			-29.2199	17.5138					-44.645	31.9531			-44.645	32.5236
	-29.2906	10.1267			-29.2906	17.2908					-43.6515	30.0776			-43.6515	33.559
	-26.0772	8.64983			-26.0772	17.0548					-43.9935	28.1962			-43.9935	34.5919
	-25.3353	7.17811			-25.3353	16.8113					-44.8888	25.2234			-44.8888	33.4829
	-27.9619	6.57536			-27.9619	15.9638					-44.3605	23.7763			-44.3605	32.3194
	-26.8557	6.27401			-26.8557	14.8547					-43.832	22.9861			-43.832	31.7796
	-26.827	5.96608			-26.827	13.7383					-41.4936	23.1599			-41.4936	29.5797
	-23.4301	5.81488			-23.4301	12.907					-31.3187	16.9275			-31.3187	21.527
	-23.4367	5.9896			-23.4367	12.5816					-31.9295	16.0919			-31.9295	20.9311
	-23.5012	6.1958			-23.5012	12.2555					-29.1847	15.2392			-29.1847	20.341
	-23.6112	6.42686			-23.6112	11.9366					-29.4249	14.6629			-29.4249	19.9473
	-23.6992	7.59882			-23.6992	12.273					-28.2748	14.6752			-28.2748	19.9606
	-23.9451	8.83974			-23.9451	12.6434					-30.4043	14.6886			-30.4043	20.0088
	-24.5475	10.0783			-24.5475	13.0079					-26.3888	14.7027			-26.3888	20.0911
	-25.0648	10.438			-25.0648	13.1787					-20.0941	7.52462			-20.0941	18.7034
	-25.3345	10.1296			-25.3345	13.2016					-20.2146	8.97331			-20.2146	18.0793
	-25.1794	9.83049			-25.1794	13.2239					-20.5368	10.4544			-20.5368	17.4684
	-25.2216	9.98793			-25.2216	13.0424					-19.6825	12.05			-19.6825	16.8374
	-24.7526	12.0268			-24.7526	12.0483					-19.5177	12.0885			-19.5177	16.3752
	-24.0234	14.0852			-24.0234	11.0827					-19.1758	11.2731			-19.1758	16.0098
	-23.9991	16.2774			-23.9991	10.0927					-15.8954	10.4362			-15.8954	15.6283
	-19.4979	14.002			-19.4979	9.26008					-16.0191	9.44533			-16.0191	15.0961
	-19.968	10.9072			-19.968	8.48267					-17.9651	8.07784			-17.9651	14.1962
	-18.3604	7.80589			-18.3604	7.68661					-17.2581	6.68365			-17.2581	13.2769
	-16.9224	5.71801			-16.9224	7.24371					-16.9526	5.29244			-16.9526	12.3565
[truncated: 163,433 more rows]

## Sheet: 4C
Left Eye	Head X (o)	Eye X Horiz Frozen (o)	Eye X Vert Frozen(o)	Eye X Tor Frozen (o)	N		Right Eye	Head X (o)	Eye X Horiz Frozen (o)	Eye X Vert Frozen (o)	Eye X Tor Frozen (o)	N		Left Eye	Head Y (o)	Eye Y Horiz Frozen (o)	Eye Y Vert Frozen (o)	Eye Y Tor Frozen (o)	N		Right Eye	Head Y (o)	Eye Y Horiz Frozen (o)	Eye Y Vert Frozen (o)	Eye Y Tor Frozen (o)	N
	15.7385	-1.98623	-11.2981	3.40092	155045			15.7385	1.04824	5.0881	-14.256	155045			-44.9994	23.6407	8.77562	15.4446	165885			-44.9994	27.094	6.41603	22.1302	165885
	20.5956	-2.49859	-12.0482	3.00085				20.5956	1.01697	4.85844	-14.7505				-43.892	23.6305	9.20881	14.9403				-43.892	27.5598	6.59019	22.6127
	23.2312	-3.02894	-12.8143	2.59458				23.2312	0.984185	4.62519	-15.2537				-44.4081	23.6256	9.65499	14.4233				-44.4081	28.0358	6.77329	23.1084
	25.4668	-3.5285	-13.5435	2.23313				25.4668	1.02065	4.48594	-15.6672				-44.0004	23.6781	10.0966	13.9766				-44.0004	28.4536	6.95502	23.5195
	26.0994	-3.84539	-14.087	2.0763				26.0994	1.37945	4.77683	-15.6672				-44.1082	23.9716	10.4934	13.8702				-44.1082	28.5933	7.10391	23.5195
	28.4987	-4.17076	-14.6453	1.91534				28.4987	1.74954	5.07654	-15.6672				-42.3607	20.3375	5.48888	14.5238				-42.3607	25.7894	7.22207	20.5556
	28.5388	-4.49491	-15.2019	1.75503				28.5388	2.11998	5.37618	-15.6672				-41.3291	20.5603	6.69452	13.8709				-41.3291	25.4117	7.01409	20.3468
	18.5061	-0.0259914	-9.1717	1.98313				18.5061	3.30194	5.5688	-13.8565				-41.199	20.8089	7.89917	13.2125				-41.199	25.0327	6.80526	20.1378
	18.2877	-1.14652	-9.92255	2.30294				18.2877	2.93531	5.24318	-13.7127				-43.1065	21.0767	9.0738	12.5644				-43.1065	24.6615	6.60058	19.9339
	18.1768	-2.28854	-10.6572	2.60998				18.1768	2.57147	4.91851	-13.5692				-41.5428	22.2694	10.7569	12.2932				-41.5428	24.3891	6.3783	19.858
	20.6864	-3.42362	-11.3594	2.89745				20.6864	2.21897	4.60248	-13.4293				-39.8066	24.0081	12.7433	12.2476				-39.8066	24.1766	6.14767	19.858
	20.2575	-4.77165	-12.8539	3.01632				20.2575	1.75287	4.20307	-13.3774				-40.2777	25.7846	14.763	12.2021				-40.2777	23.9616	5.91526	19.858
	20.933	-6.18916	-14.7751	3.0398				20.933	1.22755	3.76108	-13.3774				-39.2426	26.3152	15.4782	12.05				-39.2426	23.7272	5.6628	19.858
	21.9887	-7.57251	-16.6736	3.06323				21.9887	0.704308	3.32024	-13.3774				-38.8339	23.4096	12.6154	11.5882				-38.8339	23.4207	5.334	19.858
	23.053	-8.11852	-17.4319	2.94333				23.053	0.14267	2.84637	-13.3774				-39.763	20.5619	9.79638	11.1229				-39.763	23.1096	5.00189	19.858
	19.9958	-6.41641	-15.1336	2.41995				19.9958	-0.578615	2.23672	-13.3774				-41.4451	17.8447	7.09199	10.6656				-41.4451	22.8016	4.67452	19.858
	20.7396	-4.60363	-12.7816	1.90027				20.7396	-1.2959	1.62923	-13.3774				-39.0986	16.9185	6.78208	9.94372				-39.0986	23.0163	4.31322	20.3943
	22.6926	-2.72777	-10.4261	1.39646				22.6926	-1.99227	1.03824	-13.3774				-38.0374	16.2349	6.79444	9.18969				-38.0374	23.292	3.94547	20.9999
	23.321	-2.77913	-10.2381	1.08056				23.321	-3.01585	0.411405	-13.6469				-37.7496	15.568	6.80644	8.45331				-37.7496	23.5516	3.58246	21.5902
	23.2641	-3.10312	-10.3501	0.789095				23.2641	-4.08846	-0.216179	-13.9566				-38.6594	16.4544	8.20264	8.01657				-38.6594	23.7841	3.5069	21.8865
	25.1016	-3.42319	-10.4596	0.501999				25.1016	-5.14523	-0.827784	-14.2643				-38.2241	18.9221	10.9977	7.88511				-38.2241	23.9903	3.71874	21.8865
	27.0769	-4.76802	-12.0441	0.276369				27.0769	-5.45884	-0.948763	-14.4209				-36.1799	21.423	13.8115	7.75595				-36.1799	24.1909	3.92525	21.8865
	28.1902	-7.04114	-15.0089	0.118543				28.1902	-5.02391	-0.583025	-14.4209				-37.2309	23.7702	16.4982	7.58752				-37.2309	24.4351	4.08414	21.9849
	26.7231	-9.20674	-17.8723	-0.0358706				26.7231	-4.5961	-0.223833	-14.4209				-37.7479	24.2135	17.4738	7.17449				-37.7479	24.9497	3.89676	22.748
	27.1054	-11.2066	-20.4728	-0.154047				27.1054	-4.32546	0.0251229	-14.4869				-38.8678	24.6582	18.4242	6.77069				-38.8678	25.4441	3.71262	23.4902
	27.3237	-12.1467	-21.0618	-0.00842551				27.3237	-5.19684	-0.528898	-15.0015				-37.3905	25.1287	19.4016	6.35393				-37.3905	25.9453	3.52164	24.2522
	27.8179	-13.0706	-21.6303	0.129306				27.8179	-6.05623	-1.06776	-15.5076				-38.3281	24.7636	19.0562	6.27671				-38.3281	26.233	3.52606	24.5434
	31.3165	-14.0292	-22.2097	0.266712				31.3165	-6.95091	-1.62109	-16.0335				-36.5427	24.1413	18.2951	6.30955				-36.5427	26.4462	3.59322	24.6764
	29.0736	-13.8288	-22.0117	0.144565				29.0736	-7.12276	-1.64863	-16.2158				-35.85	23.5077	17.5136	6.34202				-35.85	26.6651	3.66199	24.8127
	27.6917	-13.2585	-21.5676	-0.0571191				27.6917	-7.05613	-1.50699	-16.2825				-35.7633	23.4887	17.094	6.70216				-35.7633	26.8537	3.75684	24.8981
	31.6627	-12.6713	-21.1082	-0.264434				31.6627	-6.98754	-1.36153	-16.3513				-36.3209	24.4648	17.277	7.58792				-36.3209	26.9871	3.89113	24.8981
	30.5872	-12.1497	-20.8965	-0.304918				30.5872	-6.83636	-1.18137	-16.3946				-36.3906	25.4667	17.4651	8.49915				-36.3906	27.1234	4.0285	24.8981
	32.0666	-11.75	-21.0996	-0.0763781				32.0666	-6.55519	-0.950178	-16.3946				-38.9795	26.4684	17.6535	9.41239				-38.9795	27.259	4.16538	24.8981
	31.6785	-11.3339	-21.3081	0.151824				31.6785	-6.26585	-0.712556	-16.3946				-38.3588	29.6776	20.7359	9.9053				-38.3588	27.4829	4.54145	24.7658
	32.2942	-10.9114	-21.5165	0.373635				32.2942	-5.97577	-0.474607	-16.3946				-39.761	33.0194	23.9478	10.4084				-39.761	27.7063	4.92409	24.6295
	34.0962	-12.5627	-24.1147	0.674317				34.0962	-5.10055	0.157419	-16.3275				-41.5173	36.3998	27.196	10.9115				-41.5173	27.9231	5.30302	24.493
	30.5772	-14.1358	-26.774	0.983466				30.5772	-4.19789	0.809123	-16.2589				-39.0612	38.3191	28.9098	11.4469				-39.0612	27.7562	5.58063	24.0803
	32.6129	-15.5738	-29.4366	1.29345				32.6129	-3.29164	1.46347	-16.1906				-38.7896	39.356	29.6753	12.016				-38.7896	27.3327	5.80451	23.4709
	29.9195	-16.1178	-30.4007	1.90522				29.9195	-2.44632	1.95282	-15.96				-39.1486	40.3905	30.4249	12.5738				-39.1486	26.9029	6.02695	22.8592
	28.3974	-16.1537	-30.2918	2.74265				28.3974	-1.61525	2.35486	-15.6197				-39.3444	39.7462	29.4838	12.9349				-39.3444	26.4998	6.20823	22.2871
	28.7083	-16.1684	-30.1736	3.58856				28.7083	-0.793292	2.75791	-15.285				-39.3481	33.2695	22.6461	12.6792				-39.3481	26.164	6.26933	21.7987
	27.3187	-15.494	-28.8516	4.15565				27.3187	-0.0671156	3.15689	-14.9507				-40.6637	27.0473	16.0159	12.4213				-40.6637	25.8258	6.33035	21.3109
	25.416	-12.109	-23.2231	3.78014				25.416	0.4282	3.58279	-14.5644				-39.9336	21.2658	9.79654	12.1669				-39.9336	25.4927	6.38996	20.8343
	22.6185	-8.28485	-17.5454	3.40635				22.6185	0.919225	4.00921	-14.1785				-38.9133	22.9819	12.1957	11.8099				-38.9133	25.2216	6.47456	20.2966
	23.1078	-4.13136	-11.8172	3.04238				23.1078	1.39543	4.42681	-13.8014				-38.3455	26.2705	16.3153	11.4274				-38.3455	24.9589	6.56469	19.7517
	21.5756	-6.04175	-13.7924	3.33648				21.5756	2.07192	5.21094	-13.2549				-39.1398	29.6481	20.429	11.0465				-39.1398	24.6973	6.65366	19.2227
	20.2628	-9.09066	-17.1752	3.75034				20.2628	2.78176	6.06634	-12.6731				-38.956	27.5849	18.0462	11.2156				-38.956	24.4179	6.68326	18.7693
	16.9628	-12.0001	-20.3957	4.14803				16.9628	3.47124	6.90504	-12.1004				-40.5615	19.6866	8.44017	12.0265				-40.5615	24.1284	6.64291	18.4145
	16.3413	-10.385	-18.2887	4.15362				16.3413	3.94255	7.52218	-11.6064				-40.3643	13.0079	-0.146278	12.8064				-40.3643	23.8453	6.60549	18.0698
	16.6931	-3.16785	-9.67337	3.68705				16.6931	4.14776	7.86077	-11.2203				-40.6885	7.94533	-7.07167	13.5103				-40.6885	23.5734	6.57309	17.7374
	17.0363	4.42866	-0.536465	3.21048				17.0363	4.34659	8.19183	-10.8418				-39.5591	9.11046	-5.35037	13.3231				-39.5591	23.5004	6.5837	17.6087
	15.6568	11.8965	8.72345	2.76474				15.6568	4.54434	8.52151	-10.4715				-41.5428	10.3208	-3.60631	13.1383				-41.5428	23.4288	6.5943	17.4834
	15.0602	9.92375	6.35685	2.99628				15.0602	4.69386	8.74456	-10.3036				-41.0646	11.6304	-1.7627	12.9474				-41.0646	23.3555	6.6054	17.3558
	13.1279	8.02514	4.11061	3.22039				13.1279	4.83955	8.96244	-10.1394				-40.1422	13.9383	0.556684	13.3444				-40.1422	23.3836	6.65223	17.2691
	13.6993	6.11261	1.8769	3.44751				13.6993	4.9882	9.18531	-9.97107				-39.7281	16.711	3.12063	13.9821				-39.7281	23.4531	6.71364	17.2004
	12.5713	3.99649	-0.72455	3.91733				12.5713	5.24541	9.58899	-9.77133				-41.528	19.491	5.69123	14.6004				-41.528	23.52	6.77348	17.1344
	12.2087	1.91318	-3.40415	4.49093				12.2087	5.54713	10.0667	-9.55877				-40.7025	21.5958	7.67115	15.077				-40.7025	23.5085	6.80896	17.044
	11.9225	0.0163737	-5.92901	5.05456				11.9225	5.84142	10.5327	-9.35107				-41.7572	22.0557	8.18887	15.2315				-41.7572	23.3347	6.79159	16.9053
	9.82501	-1.31924	-7.60255	5.6524				9.82501	6.04373	10.8292	-9.18875				-40.5482	22.5048	8.68249	15.3734				-40.5482	23.1658	6.77469	16.7704
	11.9354	-1.64138	-7.54112	6.28346				11.9354	6.04229	10.7546	-9.13123				-40.3929	22.9679	9.17911	15.5104				-40.3929	22.9923	6.75731	16.6318
	10.9775	-1.9514	-7.47695	6.89882				10.9775	6.04087	10.682	-9.07558				-40.57	23.6407	9.88406	15.5246				-40.57	23.8663	6.87759	17.3901
	9.82557	-2.26635	-7.40669	7.53224				9.82557	6.03939	10.6076	-9.01874				-40.9484	24.3127	10.5899	15.5325				-40.9484	24.77	7.00269	18.1735
	9.17197	-2.76883	-8.21535	7.47091				9.17197	5.97032	10.6492	-9.54866				-42.5019	25.0065	11.3204	15.5403				-42.5019	25.6948	7.13186	18.9752
	8.34599	-3.26226	-9.04391	7.37706				8.34599	5.89703	10.696	-10.098				-41.6116	25.2902	11.3556	15.8307				-41.6116	26.2072	7.31158	19.3169
	6.72356	-3.76106	-9.88883	7.28089				6.72356	5.81903	10.7444	-10.6646				-42.863	25.2712	10.8841	16.3186				-42.863	26.4061	7.52144	19.3169
	6.7766	-3.65607	-9.80814	7.47597				6.7766	6.12103	11.0431	-10.9076				-43.6151	25.2577	10.4053	16.8171				-43.6151	26.6066	7.73405	19.3169
	7.74055	-3.12373	-9.05836	7.87993				7.74055	6.69526	11.5172	-10.9076				-16.2074	6.56193	-1.39561	10.9219				-16.2074	-1.31191	6.82223	-6.28411
	4.34745	-2.58523	-8.28927	8.29636				4.34745	7.28584	12.0041	-10.9076				-17.7269	7.15258	-0.894648	10.9043				-17.7269	-1.30418	6.83069	-6.28411
	-24.9258	7.45785	15.0912	14.434				-24.9258	14.7698	19.7155	9.80471				-14.8859	7.76892	-0.361212	10.8836				-14.8859	-1.29626	6.83935	-6.28411
	-24.8478	6.67949	13.8408	14.0838				-24.8478	14.7909	19.7395	9.8047				-14.7679	8.39643	0.192248	10.8602				-14.7679	-1.28836	6.84801	-6.28411
	-23.1558	5.8897	12.5673	13.725				-23.1558	14.8126	19.7641	9.80471				-15.936	8.84264	0.596379	10.8511				-15.936	-1.41516	6.68175	-6.27067
	-20.4595	5.10755	11.3012	13.3662				-20.4595	14.8343	19.7886	9.80472				-15.9386	9.20178	0.927121	10.8512				-15.9386	-1.62968	6.40203	-6.2487
	-19.3197	4.56944	10.5331	13.2389				-19.3197	14.4161	19.2722	9.73748				-15.5105	9.56483	1.26232	10.8512				-15.5105	-1.85101	6.11415	-6.22639
	-19.3299	4.14789	10.0178	13.2389				-19.3299	13.7294	18.4262	9.62891				-14.694	10.2734	1.91888	10.8512				-14.694	-2.02182	5.89949	-6.19021
	-19.9522	3.7279	9.50388	13.2389				-19.9522	13.0428	17.5814	9.52017				-15.0419	12.1427	3.66447	10.8512				-15.0419	-2.04281	5.90662	-6.10127
	-21.2445	2.92521	8.52023	13.2389				-21.2445	12.5397	17.0876	9.58872				-15.4245	14.0832	5.49454	10.8511				-15.4245	-2.0638	5.92225	-6.00007
	-22.7846	0.906635	6.03771	13.2389				-22.7846	12.5298	17.5896	10.1986				-13.6085	16.0421	7.35755	10.8512				-13.6085	-2.08429	5.9457	-5.88953
	-23.0553	-1.05485	3.61204	13.2389				-23.0553	12.5199	18.0914	10.8059				-13.4455	17.074	8.48276	10.706				-13.4455	-2.04761	6.0099	-5.82257
	-21.9203	-2.91566	1.29706	13.2389				-21.9203	12.5103	18.5808	11.396				-13.8876	17.9646	9.5006	10.5374				-13.8876	-2.00213	6.08056	-5.76115
	-22.8093	-4.02984	-0.191722	13.001				-22.8093	12.6178	18.9904	11.7341				-13.2746	18.8503	10.5155	10.3719				-13.2746	-1.95794	6.15049	-5.69836
	-22.8422	-5.01871	-1.53633	12.7266				-22.8422	12.7437	19.3858	12.0302				-13.6046	17.4633	9.19357	10.3539				-13.6046	-1.90182	6.22115	-5.6642
	-20.5813	-5.97738	-2.83788	12.4594				-20.5813	12.8667	19.7719	12.3186				-13.7036	13.8013	5.52969	10.4964				-13.7036	-1.83434	6.28972	-5.66419
	-20.5428	-4.79032	-1.5146	12.2767				-20.5428	13.0153	20.0702	12.4701				-11.9488	10.4587	2.19983	10.6351				-11.9488	-1.76886	6.35625	-5.66419
	-20.7013	-1.19273	2.73976	12.189				-20.7013	13.1878	20.2661	12.4701				-12.2447	7.8695	-0.313379	10.726				-12.2447	-1.98039	6.48524	-6.03413
	-19.8109	2.48573	7.07728	12.1027				-19.8109	13.3564	20.4574	12.4701				-15.7321	10.1799	2.32978	10.37				-15.7321	-4.51184	7.16413	-9.40406
	-21.3446	5.62347	10.9243	12.1811				-21.3446	13.7888	20.705	12.4669				-14.1549	12.626	4.92809	9.96742				-14.1549	-7.06707	7.91504	-12.6562
	-21.6484	2.29682	8.43571	13.6168				-21.6484	16.2344	21.378	12.308				-14.2237	15.299	7.5815	9.50199				-14.2237	-9.74596	8.76862	-15.9145
	-23.147	-0.877756	6.14353	15.0019				-23.147	18.4396	22.0521	11.9209				-13.9958	15.7855	8.43643	8.743				-13.9958	-11.8576	9.1198	-18.1459
	-22.2452	-4.038	3.93428	16.3937				-22.2452	20.4921	22.7652	11.2789				-13.6897	15.4461	8.59833	7.88267				-13.6897	-13.7058	9.26565	-19.979
	-22.8359	-5.42345	3.79327	17.3869				-22.8359	21.2845	23.0071	11.3882				-12.4304	15.1083	8.72858	6.97397				-12.4304	-15.5976	9.41773	-21.8573
	-22.9596	-6.16968	4.36681	18.1927				-22.9596	21.6285	23.0678	11.8017				-9.93093	14.3088	8.48674	6.18867				-9.93093	-16.9722	9.4226	-23.1479
	-23.4097	-6.94538	4.94825	18.984				-23.4097	21.9499	23.1309	12.1989				-9.97093	12.7096	7.65358	5.67952				-9.97093	-17.4052	9.16019	-23.3689
	-21.447	-7.17851	5.63461	19.2648				-21.447	21.9489	22.8976	12.5051				-6.28739	11.0812	6.8087	5.1572				-6.28739	-17.854	8.88517	-23.595
	-22.4647	-6.41302	6.50578	18.6908				-22.4647	21.4309	22.1492	12.6826				-7.4388	9.46347	5.97289	4.63413				-7.4388	-18.3079	8.60392	-23.8207
	-22.2199	-5.59651	7.4105	18.1041				-22.2199	20.9071	21.3858	12.8653				-7.20393	8.46271	5.60133	4.35723				-7.20393	-18.3592	8.14789	-23.4967
	-23.2074	-4.7472	8.32797	17.5187				-23.2074	20.3903	20.6255	13.0488				-4.73276	7.45114	5.19014	4.05258				-4.73276	-18.4097	7.73059	-23.0723
	-23.9006	-4.22622	8.0548	16.2518				-23.9006	19.7939	20.8529	14.5733				-0.0901131	6.44617	4.7396	3.7229				-0.0901131	-18.4672	7.37183	-22.5704
	-23.3628	-3.68531	7.74616	14.9382				-23.3628	19.1756	21.1189	16.1417				-1.12387	5.72739	4.17395	3.73611				-1.12387	-18.5869	7.18068	-22.2881
	-23.3362	-3.13242	7.43987	13.6337				-23.3362	18.5557	21.3909	17.6706				-3.27188	5.18408	3.51112	3.99159				-3.27188	-18.7522	7.08369	-22.1608
	-22.6785	-2.34165	7.48793	12.7768				-22.6785	18.1814	21.6992	18.8337				-2.86923	4.65574	2.83401	4.23649				-2.86923	-18.9183	7.00533	-22.0059
	-21.8162	-1.35528	7.78908	12.1846				-21.8162	17.9625	22.0444	19.8098				-2.16142	8.17451	5.88502	4.19631				-2.16142	-3.07267	5.43098	-6.62641
	-21.2428	-0.366814	8.09951	11.5875				-21.2428	17.7445	22.3892	20.7791				-6.49744	9.86451	7.27205	4.31459				-6.49744	-2.81992	5.6035	-6.66266
	-24.0866	-4.29108	5.38135	13.2299				-24.0866	11.5751	16.4266	10.5512				-7.2262	11.5515	8.67472	4.4301				-7.2262	-2.57488	5.78223	-6.68685
	-25.1486	-5.83985	3.52802	13.1873				-25.1486	11.9829	16.4159	9.93713				-7.74123	12.8202	10.1792	3.85307				-7.74123	-2.3524	5.93538	-6.66213
	-24.3446	-7.31888	1.74379	13.1453				-24.3446	12.3836	16.4058	9.33533				-7.94503	13.1068	11.6437	1.6703				-7.94503	-2.18786	6.00389	-6.54942
	-22.6913	-9.28753	0.491251	13.5508				-22.6913	12.7082	16.4843	8.93221				-7.99445	13.512	12.9089	-0.555003				-7.99445	-2.02748	6.07035	-6.43909
	-24.3963	-12.4021	0.464712	14.8462				-24.3963	12.8419	16.7576	8.99946				-8.05634	14.0507	14.0393	-2.92108				-8.05634	-1.86343	6.13803	-6.32575
	-24.2673	-15.5412	0.44741	15.9593				-24.2673	12.9729	17.0246	9.06462				-7.46637	14.8306	14.7326	-3.28638				-7.46637	-1.71839	6.18806	-6.23229
	-23.9468	-18.8525	0.418442	16.9437				-23.9468	13.1077	17.2982	9.1309				-6.71147	15.6107	15.3877	-3.5035				-6.71147	-1.57848	6.23547	-6.1426
	-23.5158	-19.9391	-0.154484	17.0971				-23.5158	13.2028	17.4351	9.09258				-5.69655	16.4199	16.0638	-3.72714				-5.69655	-1.43497	6.28396	-6.05054
	-23.764	-20.8417	-0.743891	17.1942				-23.764	13.2931	17.5592	9.04808				-6.42102	15.7091	15.3426	-2.78171				-6.42102	-1.47203	6.33617	-6.12301
	-23.1715	-21.7676	-1.34378	17.2925				-23.1715	13.3862	17.6866	9.00238				-5.64941	13.9419	13.4804	-0.999082				-5.64941	-1.64847	6.38962	-6.32098
	-22.2711	-20.0848	-1.03861	16.8672				-22.2711	13.5267	17.8555	9.07517				-5.03742	12.2814	11.4677	0.768744				-5.03742	-1.83001	6.44415	-6.52404
	-23.1764	-16.4754	-0.029997	15.9738				-23.1764	13.6991	18.0518	9.23805				-4.47498	10.9253	9.63681	2.17675				-4.47498	-2.00301	6.49316	-6.72568
	-22.8901	-12.8319	1.03709	14.9585				-22.8901	13.8752	18.2534	9.40552				-8.22617	10.2934	9.09097	2.21306				-8.22617	-2.13173	6.51908	-6.91521
	-21.8841	-9.76677	2.055	14.035				-21.8841	14.0341	18.3807	9.49829				-4.60726	9.65205	8.53635	2.25002				-4.60726	-2.26369	6.54827	-7.10631
	-21.3562	-9.12586	2.62899	13.9483				-21.3562	14.1156	18.1715	9.25094				-4.49117	9.0168	7.98643	2.28677				-4.49117	-2.39576	6.58014	-7.29429
	-21.6376	-8.46518	3.22152	13.8593				-21.6376	14.1988	17.9571	8.9952				-6.67808	9.27821	8.0194	2.57084				-6.67808	-2.37015	6.50911	-7.24547
	-21.9249	-7.80021	3.81869	13.7703				-21.9249	14.2818	17.7429	8.73712				-4.93242	9.77832	8.20356	2.92653				-4.93242	-2.30399	6.4083	-7.13194
	-21.1231	-7.66812	3.60776	13.6799				-21.1231	14.0785	17.2961	8.41806				-6.09578	10.2785	8.38812	3.28105				-6.09578	-2.23894	6.30681	-7.01559
	-22.1827	-7.66909	3.18098	13.5835				-22.1827	13.7942	16.776	8.07457				-4.00137	10.3092	8.35169	3.38175				-4.00137	-2.12202	6.24668	-6.88487
	-22.6526	-7.66862	2.75431	13.4839				-22.6526	13.5091	16.2564	7.73195				-8.19467	9.66275	7.99498	3.12243				-8.19467	-1.92185	6.24539	-6.72528
	-23.0249	-7.56186	2.69995	13.4019				-23.0249	13.309	15.814	7.35302				-7.84061	9.0174	7.64146	2.86322				-7.84061	-1.7218	6.2467	-6.56073
	-20.6425	-7.29326	3.18246	13.3437				-20.6425	13.2206	15.4563	6.899				-7.17892	8.37723	7.28619	2.61422				-7.17892	-1.52597	6.25102	-6.39528
	-20.608	-7.02004	3.66675	13.2846				-20.608	13.1319	15.0989	6.44657				-8.22812	7.32287	6.42076	2.54056				-8.22812	-1.31634	6.27918	-6.23364
	-20.3975	-6.73194	4.1605	13.2309				-20.3975	13.0459	14.751	6.00594				-8.64654	6.28035	5.57563	2.46604				-8.64654	-1.10632	6.31019	-6.06708
	-19.5729	-5.75767	5.41961	13.3852				-19.5729	13.0069	14.4586	5.57205				-8.64793	5.27457	4.7709	2.39243				-8.64793	-0.900913	6.34322	-5.89971
	-20.0925	-4.76704	6.69272	13.5395				-20.0925	12.9677	14.1657	5.13883				-11.0596	5.34981	4.86057	2.33942				-11.0596	-0.810567	6.33892	-5.80932
	-19.0104	-3.7837	7.94937	13.6901				-19.0104	12.9293	13.8796	4.7166				-11.2306	6.02825	5.44496	2.29873				-11.2306	-0.785664	6.31284	-5.7645
	-18.5646	-3.93717	7.93207	13.7981				-18.5646	12.86	13.6739	4.49338				-11.1502	6.71004	6.03195	2.25814				-11.1502	-0.761061	6.28695	-5.71976
	-18.8272	-4.72201	7.20633	13.8809				-18.8272	12.7746	13.5158	4.38372				-9.29134	7.21138	6.4634	2.2285				-9.29134	-0.723225	6.27684	-5.67453
	-18.2627	-5.49453	6.49261	13.963				-18.2627	12.6898	13.359	4.27502				-9.87303	7.21138	6.4634	2.22849				-9.87303	-0.6486	6.30967	-5.62774
	-19.4352	-6.05273	5.9773	14.0227				-19.4352	12.6382	13.2399	4.16681				-9.17785	7.21137	6.4634	2.22849				-9.17785	-0.574007	6.34273	-5.58067
	-19.106	-6.05273	5.9773	14.0227				-19.106	12.6764	13.2207	4.05788				-10.2859	7.21138	6.4634	2.22849				-10.2859	-0.501201	6.37522	-5.53443
	-19.2409	-6.05273	5.97731	14.0227				-19.2409	12.7146	13.2016	3.94905				-11.1508	6.44	5.82356	2.22567				-11.1508	-0.469312	6.35537	-5.48622
	-18.8035	-6.05273	5.9773	14.0227				-18.8035	12.752	13.183	3.84292				-10.7864	5.58516	5.11786	2.22249				-10.7864	-0.442761	6.32896	-5.43766
	-19.4184	-5.25503	6.82008	14.0087				-19.4184	12.6786	13.0433	3.73762				-9.96499	4.7639	4.44338	2.2194				-9.96499	-0.416989	6.30318	-5.39012
	-20.0752	-4.35031	7.77457	13.993				-20.0752	12.5915	12.8889	3.63282				-10.1635	4.32101	4.01485	2.27524				-10.1635	-0.37011	6.33188	-5.3662
	-20.1537	-3.45926	8.71312	13.9777				-20.1537	12.5065	12.7385	3.53084				-10.233	4.25175	3.82849	2.38597				-10.233	-0.303834	6.41307	-5.3662
	-20.3109	-2.87219	9.46858	14.1729				-20.3109	12.5509	12.7595	3.47978				-10.1002	4.18544	3.64811	2.49156				-10.1002	-0.239756	6.49166	-5.36621
	-20.4664	-2.60435	10.0208	14.5702				-20.4664	12.7211	12.948	3.47978				-10.2749	4.18495	3.56346	2.54578				-10.2749	-0.172943	6.5737	-5.3662
	-20.6125	-2.34429	10.5581	14.9572				-20.6125	12.8868	13.1315	3.47979				-10.2938	4.61832	4.12351	2.26546				-10.2938	-0.0975699	6.66639	-5.3662
	-20.3419	-2.23558	10.927	15.2897				-20.3419	13.0607	13.3241	3.47978				-10.2634	5.05297	4.67936	1.99202				-10.2634	-0.0244776	6.75639	-5.36621
	-20.373	-3.13898	10.127	15.2033				-20.373	13.2584	13.543	3.47978				-10.2403	5.50995	5.25796	1.71211				-10.2403	0.0498781	6.84808	-5.36621
	-20.2572	-4.02052	9.35234	15.1179				-20.2572	13.4516	13.757	3.47978				-10.2633	5.42937	5.17138	1.73231				-10.2633	0.143193	6.96335	-5.3662
	-20.2614	-4.92316	8.5653	15.0294				-20.2614	13.6496	13.9764	3.47978				-10.2705	5.18146	4.87795	1.84661				-10.2705	0.239555	7.08262	-5.36621
	-20.3156	-4.80408	8.71133	15.0717				-20.3156	13.9004	14.2544	3.47979				-9.98316	4.93038	4.58032	1.96374				-9.98316	0.337323	7.20388	-5.3662
	-19.7158	-4.3656	9.1481	15.1543				-19.7158	14.1621	14.5444	3.47978				-9.61924	4.41305	4.06758	2.08433				-9.61924	0.4501	7.26468	-5.29903
	-20.0543	-3.91602	9.59724	15.2388				-20.0543	14.4305	14.8421	3.47977				-11.0567	3.49366	3.23621	2.20757				-11.0567	0.584958	7.22918	-5.123
	-20.2859	-3.16167	10.3717	15.3261				-20.2859	14.5108	14.8345	3.31769				-11.5049	2.57528	2.41079	2.33387				-11.5049	0.722413	7.19381	-4.93816
	-17.8178	-1.92993	11.656	15.4158				-17.8178	14.287	14.3386	2.90125				-11.0348	1.68563	1.61608	2.46005				-11.0348	0.858969	7.15962	-4.74919
	-17.9312	-0.655387	12.9869	15.5075				-17.9312	14.0567	13.8311	2.47632				-10.9868	2.94	2.54343	2.49117				-10.9868	0.898171	7.20911	-4.74918
	-18.6237	0.62673	14.3278	15.5994				-18.6237	13.8261	13.3255	2.05393				-12.746	4.25147	3.51677	2.52202				-12.746	0.937997	7.25945	-4.74919
	-18.736	-0.821129	12.9679	15.83				-18.736	13.9329	13.443	2.05393				-12.6367	5.59618	4.51862	2.55205				-12.6367	0.977765	7.30976	-4.74919
	-19.5298	-2.27056	11.602	16.0653				-19.5298	14.042	13.5629	2.05394				-12.9142	6.214	4.93037	2.62965				-12.9142	0.996389	7.33333	-4.74919
	-20.8363	-3.69546	10.255	16.3012				-20.8363	14.1513	13.6831	2.05393				-13.0209	6.38964	4.97916	2.74007				-13.0209	1.00262	7.34123	-4.74919
	-20.9762	-4.23718	9.72605	16.4413				-20.9762	14.2027	13.7396	2.05394				-11.2348	6.56497	5.02785	2.85031				-11.2348	1.00885	7.34911	-4.74919
	-20.5568	-4.2607	9.67745	16.5268				-20.5568	14.2199	13.7586	2.05393				-11.8582	6.72653	5.06576	2.96061				-11.8582	1.02736	7.37256	-4.74919
	-19.2619	-4.28397	9.62899	16.6121				-19.2619	14.2371	13.7775	2.05393				-12.4299	6.85633	5.07077	3.08108				-12.4299	1.08876	7.45042	-4.74919
	-19.9769	-4.29249	9.5953	16.6961				-19.9769	14.2884	13.8339	2.05394				-12.118	6.98618	5.07576	3.2016				-12.118	1.14978	7.52793	-4.74919
	-20.2673	-4.25275	9.60816	16.7838				-20.2673	14.4591	14.0217	2.05393				-11.9806	7.11271	5.08062	3.31907				-11.9806	1.20887	7.60308	-4.74918
	-20.5219	-4.21306	9.62103	16.8715				-20.5219	14.63	14.2097	2.05393				-12.4032	8.46613	6.15255	3.33772				-12.4032	1.55648	7.60519	-4.41264
	-20.7795	-4.17446	9.63357	16.9568				-20.7795	14.7967	14.3931	2.05393				-11.4444	10.0754	7.46021	3.33773				-11.4444	1.9554	7.5937	-4.01484
	-19.3979	-5.54987	8.12724	16.9704				-19.3979	14.6963	14.2719	1.81679				-11.4604	11.6783	8.77745	3.33773				-11.4604	2.34371	7.58262	-3.6267
	-19.2468	-7.15103	6.37486	16.9704				-19.2468	14.5452	14.0945	1.53778				-11.3627	11.6169	8.62562	3.51114				-11.3627	2.6233	7.56824	-3.34637
	-18.052	-8.68137	4.69634	16.9704				-18.052	14.3966	13.9217	1.26691				-11.4272	9.64747	6.77974	3.88071				-11.4272	2.76802	7.55039	-3.2007
	-18.0524	-8.39968	4.80919	16.9335				-18.0524	14.2875	13.8256	1.10554				-11.0162	7.8076	5.04827	4.24042				-11.0162	2.90926	7.533	-3.05852
	-18.1054	-6.01437	7.02338	16.8523				-18.1054	14.2289	13.8218	1.07572				-11.6042	6.2783	3.58814	4.57433				-11.6042	3.05586	7.51658	-2.91217
	-18.6937	-3.65051	9.24093	16.7699				-18.6937	14.1715	13.8181	1.04642				-12.5237	7.45254	4.53848	4.57431				-12.5237	3.22202	7.51387	-2.75814
	-19.6236	-1.53456	11.2259	16.6903				-19.6236	14.1155	13.8181	1.01625				-15.0165	8.62284	5.49504	4.57432				-15.0165	3.38421	7.51126	-2.60781
	-18.7175	-2.81606	9.80808	16.6903				-18.7175	14.0899	13.8558	0.986379				-15.0192	9.84532	6.50352	4.57432				-15.0192	3.55034	7.5086	-2.45386
	-18.4867	-4.04759	8.44211	16.6903				-18.4867	14.0649	13.8926	0.956983				-14.6378	10.2013	6.79888	4.57433				-14.6378	3.67205	7.46245	-2.30865
	-19.5554	-5.28972	7.06116	16.6903				-19.5554	14.0391	13.9303	0.926635				-12.6707	10.2013	6.79889	4.57432				-12.6707	3.77552	7.39863	-2.16698
	-17.9108	-5.64351	6.66728	16.6903				-17.9108	13.9154	13.8593	0.896902				-12.4485	10.2013	6.79889	4.57432				-12.4485	3.8762	7.33623	-2.02873
	-17.3125	-5.64351	6.66727	16.6903				-17.3125	13.7516	13.7445	0.867294				-13.9507	10.2013	6.79889	4.57432				-13.9507	4.0547	7.31195	-1.83531
	-16.8657	-5.6435	6.66727	16.6903				-16.8657	13.5912	13.6326	0.838215				-13.6438	10.2013	6.79889	4.57432				-13.6438	4.38311	7.36737	-1.5378
	-16.8982	-5.6435	6.66727	16.6903				-16.8982	13.4719	13.5023	0.701646				-14.2866	10.2013	6.79888	4.57432				-14.2866	4.70366	7.42283	-1.24532
	-17.356	-5.64351	6.66727	16.6903				-17.356	13.4425	13.3409	0.354884				-13.7373	10.2013	6.79888	4.57432				-13.7373	5.03198	7.48101	-0.94367
	-17.3202	-5.64351	6.66728	16.6903				-17.3202	13.4136	13.1836	0.017987				-13.9239	11.7896	8.16933	4.38782				-13.9239	4.75234	7.68775	-1.34682
	-17.7076	-5.64351	6.66727	16.6903				-17.7076	13.3838	13.0228	-0.325489				-13.8357	13.4571	9.59544	4.19363				-13.8357	4.44946	7.89505	-1.77158
	-17.9353	-7.39879	5.17887	17.033				-17.9353	13.9009	13.3862	-0.251583				-13.9755	15.2044	11.0772	3.99159				-13.9755	4.13684	8.10528	-2.20538
	-18.1886	-9.16374	3.69219	17.3805				-18.1886	14.4252	13.7651	-0.163354				-14.8347	16.0661	11.802	3.85393				-14.8347	4.04067	8.12484	-2.30656
	-17.9788	-10.9385	2.20797	17.7328				-17.9788	14.955	14.1531	-0.0751742				-13.0517	16.2612	11.9619	3.76629				-13.0517	4.10053	8.00954	-2.17045
	-17.0332	-11.8294	1.55475	17.9755				-17.0332	15.0104	14.1714	-0.0553793				-11.3505	16.4617	12.1242	3.67587				-11.3505	4.1607	7.89105	-2.03136
	-14.4618	-12.0879	1.48743	18.136				-14.4618	14.7316	13.9281	-0.083496				-11.2687	16.77	12.3742	3.58535				-11.2687	4.21863	7.83166	-1.93006
	-15.9031	-12.3522	1.41879	18.2997				-15.9031	14.4458	13.6797	-0.112432				-12.5044	17.4902	12.9648	3.49802				-12.5044	4.27007	8.0029	-1.9746
	-16.1979	-12.7059	1.25011	18.4625				-16.1979	14.2823	13.5139	-0.170004				-12.9654	18.233	13.5717	3.40791				-12.9654	4.32139	8.17888	-2.01903
	-16.0236	-13.3969	0.70094	18.6214				-16.0236	14.5936	13.6665	-0.336499				-14.691	18.9825	14.1819	3.317				-14.691	4.37144	8.35582	-2.06232
	-15.2962	-14.1	0.144206	18.7835				-15.2962	14.9119	13.8234	-0.507047				-14.2869	18.7148	13.9552	3.30122				-14.2869	4.39613	8.40765	-2.06968
	-15.6054	-14.7998	-0.407889	18.9451				-15.6054	15.2302	13.9812	-0.67792				-11.984	18.2196	13.5423	3.30121				-11.984	4.41632	8.43409	-2.06968
	-15.0267	-14.5988	-0.146916	18.973				-15.0267	15.3338	14.0603	-0.707454				-15.3963	17.7276	13.1331	3.30122				-15.3963	4.43642	8.46045	-2.06969
	-15.5724	-14.1953	0.299666	18.973				-15.5724	15.3947	14.1251	-0.707439				-14.9174	17.2235	12.715	3.30122				-14.9174	4.40242	8.41589	-2.06968
	-16.2618	-13.7908	0.747387	18.973				-16.2618	15.4554	14.1898	-0.707446				-13.8824	16.6729	12.2597	3.30122				-13.8824	4.29547	8.27601	-2.06968
	-16.0346	-13.3726	1.21038	18.9729				-16.0346	15.3528	14.0805	-0.707451				-15.3455	16.1252	11.8083	3.30122				-15.3455	4.18723	8.13495	-2.06968
	-16.4695	-12.9113	1.7211	18.973				-16.4695	15.0328	13.7399	-0.707443				-15.4075	15.5905	11.3775	3.29846				-15.4075	4.08787	8.0059	-2.06969
	-17.2103	-12.4476	2.23447	18.973				-17.2103	14.7132	13.3999	-0.70745				-15.137	14.9882	11.0604	3.23928				-15.137	4.13611	8.0685	-2.06968
	-17.3236	-11.9961	2.72201	18.9542				-17.3236	14.4237	13.0918	-0.707452				-14.1126	14.388	10.7399	3.17778				-14.1126	4.18409	8.13086	-2.06968
	-18.6665	-11.604	2.89895	18.5611				-18.6665	14.5638	13.2409	-0.707447				-13.8729	13.8041	10.4237	3.11551				-13.8729	4.23069	8.19152	-2.06969
	-18.1579	-11.2081	3.07682	18.1684				-18.1579	14.704	13.3901	-0.707453				-16	13.4214	10.2281	3.13016				-16	4.68887	7.95163	-1.4857
	-18.368	-10.818	3.25144	17.7854				-18.368	14.841	13.5358	-0.707448				-15.7324	13.1455	10.0926	3.18142				-15.7324	5.34022	7.55914	-0.613742
	-18.6218	-10.505	3.2446	17.3823				-18.6218	14.2359	13.1326	-0.820478				-16.0361	12.8771	9.95495	3.228				-16.0361	5.96391	7.17262	0.235726
	-15.7723	-10.2356	3.14483	16.9732				-15.7723	13.2454	12.4592	-0.995892				-13.1403	13.2342	10.0244	3.58323				-13.1403	6.41776	6.87485	0.879753
	-16.8377	-9.97192	3.0469	16.5734				-16.8377	12.26	11.8059	-1.17454				-15.5401	15.1241	10.6131	4.69357				-15.5401	6.4481	6.82243	0.978932
	-13.0278	-9.83125	2.8613	16.5798				-13.0278	11.4741	11.2378	-1.36604				-15.6532	16.9683	11.1827	5.77867				-15.6532	6.47724	6.77106	1.07665
	-13.5563	-9.98744	2.47254	17.5974				-13.5563	11.2696	10.9067	-1.56202				-15.4074	18.8564	11.7613	6.89129				-15.4074	6.5066	6.71823	1.17769
	-13.0088	-10.1106	2.09738	18.591				-13.0088	11.0696	10.5837	-1.75292				-15.4469	18.6277	11.7691	7.00451				-15.4469	7.02469	7.13516	1.42923
	-12.9635	-10.205	1.71719	19.6096				-12.9635	10.8645	10.2531	-1.94808				-13.6597	18.2119	11.7016	7.0053				-13.6597	7.56963	7.58869	1.6942
	-12.6614	-9.96632	1.21059	18.7736				-12.6614	11.5441	10.6627	-2.40846				-15.1441	17.788	11.6075	6.98608				-15.1441	8.11966	8.05525	1.97063
	-12.6911	-9.70223	0.697922	17.7858				-12.6911	12.2973	11.136	-2.88054				-16.0167	17.6988	11.3379	7.24739				-16.0167	9.00116	8.45873	2.57492
	-13.254	-9.43025	0.168837	16.7756				-13.254	13.0754	11.6258	-3.36046				-17.558	17.8937	10.9401	7.74549				-17.558	10.1457	8.79719	3.43899
	-15.6848	-9.02041	0.410839	16.7941				-15.6848	13.7287	12.2095	-3.81792				-17.848	18.0969	10.5314	8.24698				-17.848	11.3117	9.13911	4.32182
	-16.1568	-8.50774	1.29577	17.6778				-16.1568	14.2712	12.8601	-4.25073				-16.4011	18.41	10.234	8.76266				-16.4011	12.4008	9.47375	5.16919
	-16.0272	-7.98889	2.19911	18.5868				-16.0272	14.8405	13.5287	-4.69448				-22.0721	19.2547	10.5205	9.37483				-22.0721	13.0895	9.79074	5.82603
	-12.3469	-7.54954	2.88567	19.3725				-12.3469	15.3568	14.0387	-5.20946				-21.438	20.123	10.8173	10.0048				-21.438	13.7973	10.1314	6.51725
	-13.2825	-7.49747	2.45809	19.481				-13.2825	15.5219	13.7153	-6.0606				-20.2696	20.9891	11.1155	10.6339				-20.2696	14.5031	10.486	7.22258
	-13.1043	-7.43774	2.01919	19.5869				-13.1043	15.6942	13.3878	-6.9257				-21.884	19.8256	9.80815	10.9985				-21.884	14.9386	10.5843	7.64051
	-12.6641	-7.37168	1.58203	19.6867				-12.6641	15.8687	13.0664	-7.77865				-23.6621	18.1945	8.15371	11.2828				-23.6621	15.2903	10.6088	7.96777
	-12.0329	-5.97269	3.06355	19.7536				-12.0329	15.8812	13.0091	-8.08057				-23.828	16.5745	6.51447	11.5752				-23.828	15.6519	10.6341	8.30417
	-11.1703	-4.23262	5.05934	19.8098				-11.1703	15.8491	13.0233	-8.22865				-24.1088	16.4423	6.24911	11.7104				-24.1088	15.9182	10.6847	8.4793
	-10.7425	-2.41882	7.15589	19.8665				-10.7425	15.8156	13.038	-8.3814				-24.0644	18.3994	7.89154	11.6142				-24.0644	16.0417	10.7685	8.4231
	-11.5344	-2.11369	7.65211	20.1315				-11.5344	15.9904	13.327	-8.37419				-24.8195	20.4704	9.61655	11.5077				-24.8195	16.1659	10.8522	8.36714
	-10.7639	-3.94922	5.85038	20.6861				-10.7639	16.4575	13.9993	-8.13945				-25.4624	22.4943	11.2913	11.3936				-25.4624	16.2714	10.9282	8.30324
	-11.9092	-5.78387	4.04944	21.2534				-11.9092	16.9379	14.6905	-7.89802				-21.5027	20.8786	9.98704	11.2802				-21.5027	15.8197	10.8203	7.9111
	-11.8034	-7.48872	2.38638	21.8006				-11.8034	17.4025	15.3609	-7.65592				-23.3635	19.2485	8.68702	11.1641				-23.3635	15.3568	10.71	7.50966
	-12.3397	-6.34324	3.9072	21.7171				-12.3397	17.2817	15.265	-7.41268				-23.657	17.6452	7.42508	11.0479				-23.657	14.8936	10.6	7.1085
	-14.1718	-5.13698	5.49052	21.6315				-14.1718	17.1591	15.1671	-7.1634				-26.9141	13.8326	1.25666	14.9719				-26.9141	22.5068	8.08242	14.9093
	-14.2971	-3.89711	7.10015	21.5459				-14.2971	17.0376	15.0697	-6.91396				-26.0855	12.7885	0.72493	14.3822				-26.0855	22.4105	8.05667	14.8011
	-13.402	4.72314	8.23552	13.3396				-13.402	10.5195	14.3586	-7.74347				-26.6586	11.7204	0.167567	13.7685				-26.6586	22.3117	8.03082	14.6905
	-13.1839	5.12773	8.37103	12.4979				-13.1839	10.5675	14.5123	-7.57321				-27.9002	10.6563	-0.401347	13.1463				-27.9002	22.2128	8.00557	14.5804
	-12.4757	5.55887	8.51709	11.6424				-12.4757	10.6166	14.6701	-7.39808				-28.4624	11.9087	1.09874	12.8775				-28.4624	22.2196	7.93485	14.684
	-12.364	6.00597	8.67059	10.7951				-12.364	10.6656	14.828	-7.22255				-24.905	13.3004	2.74856	12.6087				-24.905	22.2275	7.86072	14.7946
	-11.6558	4.2114	6.39407	10.6556				-11.6558	10.3494	14.4463	-7.38774				-24.3457	14.7563	4.46954	12.3402				-24.3457	22.2343	7.78578	14.9057
	-10.9754	2.35678	4.06395	10.5255				-10.9754	10.0184	14.0453	-7.563				-23.5505	15.3729	5.02261	12.4207				-23.5505	22.1797	7.67162	14.9819
	-9.77268	0.529214	1.78165	10.3953				-9.77268	9.6871	13.6448	-7.73788				-23.7402	15.417	4.77466	12.7411				-23.7402	22.0801	7.52498	15.0373
	-9.38088	0.0206979	1.17519	10.5086				-9.38088	9.28628	13.2174	-7.85972				-24.5293	15.4635	4.52886	13.0612				-24.5293	21.9785	7.3764	15.0928
	-8.23037	0.372309	1.66078	10.7927				-8.23037	8.8225	12.7548	-7.95061				-24.1999	15.501	4.34065	13.3079				-24.1999	21.9625	7.22671	15.2398
	-9.06656	0.721118	2.14719	11.0778				-9.06656	8.35947	12.2929	-8.0414				-22.8413	15.501	4.34065	13.3079				-22.8413	22.2718	7.06002	15.7499
	-9.032	0.988409	2.52316	11.2983				-9.032	7.84838	11.7845	-8.20632				-22.8888	15.501	4.34065	13.3079				-22.8888	22.5754	6.89028	16.2616
	-8.45393	0.988408	2.52316	11.2983				-8.45393	7.08974	11.0393	-8.67025				-23.0192	15.501	4.34065	13.3079				-23.0192	22.873	6.71755	16.7749
	-8.08485	0.988402	2.52316	11.2983				-8.08485	6.3247	10.2955	-9.13318				-23.3157	14.0646	2.90529	13.3079				-23.3157	23.25	6.81684	17.1172
	-8.17356	0.9884	2.52316	11.2983				-8.17356	5.55331	9.55317	-9.59519				-24.0014	12.3833	1.23576	13.3079				-24.0014	23.6524	6.96986	17.4395
	-8.37619	2.42971	4.40646	11.2983				-8.37619	5.55752	9.45437	-9.935				-25.2408	10.7651	-0.358237	13.3079				-25.2408	24.0545	7.12468	17.7629
	-7.58998	4.21604	6.72802	11.2983				-7.58998	5.703	9.46896	-10.2619				-25.4324	9.34994	-1.62092	13.1587				-25.4324	24.1645	7.11416	17.9044
	-5.09321	6.05114	9.10066	11.2983				-5.09321	5.84961	9.48427	-10.588				-24.1129	8.06439	-2.61112	12.8263				-24.1129	23.9366	6.90725	17.8386
	-5.78464	7.56119	10.9667	11.1248				-5.78464	5.72226	9.34749	-10.7177				-24.1675	6.80878	-3.57606	12.4933				-24.1675	23.7071	6.7	17.7731
	-6.63267	8.74509	12.3001	10.7406				-6.63267	5.26819	9.02594	-10.6245				-26.0585	5.69532	-4.4299	12.1902				-26.0585	23.4574	6.51238	17.6711
	-6.54107	9.96156	13.6549	10.3589				-6.54107	4.81708	8.70608	-10.5312				-27.9008	5.69532	-4.42989	12.1902				-27.9008	22.9104	6.52497	17.0887
	-6.60395	11.0946	14.904	10.0144				-6.60395	4.43592	8.43558	-10.4154				-24.1635	5.69533	-4.42989	12.1902				-24.1635	22.3618	6.53789	16.5065
	-6.71764	11.0946	14.9041	10.0144				-6.71764	4.78836	8.68873	-9.99127				-24.0337	5.69533	-4.42989	12.1902				-24.0337	21.826	6.5508	15.9394
	-8.47692	11.0946	14.9041	10.0144				-8.47692	5.13589	8.94206	-9.5683				-25.5989	20.8319	11.0883	11.891				-25.5989	23.9263	6.88798	18.9642
	-6.53761	11.0946	14.9041	10.0144				-6.53761	5.46984	9.18901	-9.15727				-26.7355	20.6314	11.197	11.5587				-26.7355	24.1498	7.49426	18.907
	-5.33624	-5.64171	-4.44771	11.8179				-5.33624	3.34784	5.23232	-12.9101				-27.4314	20.427	11.3074	11.2178				-27.4314	24.3658	8.12156	18.8504
	-5.4214	-5.90368	-4.4193	11.8746				-5.4214	4.50962	5.70666	-13.1913				-25.9083	20.9597	12.019	11.0159				-25.9083	24.6415	8.43917	19.0697
	-3.46705	-6.17388	-4.39002	11.93				-3.46705	5.70375	6.20156	-13.4786				-24.7528	22.0544	13.1892	10.9246				-24.7528	24.9631	8.51146	19.4946
	-1.89188	-6.85997	-5.14078	11.8617				-1.89188	6.10254	6.22038	-13.8319				-25.1803	23.193	14.4089	10.8308				-25.1803	25.2919	8.58766	19.9318
	-1.62365	-7.83695	-6.45902	11.7021				-1.62365	5.88191	5.87131	-14.2261				-28.1547	24.1209	15.3879	10.7794				-28.1547	25.2362	8.63993	19.9514
	0.99942	-8.82638	-7.79775	11.5389				0.99942	5.65393	5.51462	-14.6284				-25.7583	24.0528	15.2219	10.9103				-25.7583	23.5194	8.58045	18.1579
	0.0802703	-9.57779	-8.91881	11.3339				0.0802703	5.62763	5.30645	-14.754				-27.1951	23.984	15.0463	11.04				-27.1951	21.7511	8.52177	16.3162
	0.916045	-9.32892	-9.11713	10.9509				0.916045	6.45675	5.74103	-13.7022				-26.9325	23.9163	14.8653	11.165				-26.9325	19.9738	8.46538	14.4707
	1.20579	-9.07483	-9.31986	10.5568				1.20579	7.26755	6.1873	-12.645				-26.2955	23.476	14.6017	10.9677				-26.2955	19.6041	8.34185	14.2797
	2.38426	-8.82166	-9.5221	10.1606				2.38426	8.04177	6.63463	-11.6051				-26.4063	22.932	14.3125	10.6868				-26.4063	19.5674	8.19602	14.4902
	4.45533	-8.72793	-9.28725	10.0677				4.45533	7.73669	6.18238	-11.6137				-25.7742	22.3889	14.0251	10.4064				-25.7742	19.5274	8.0482	14.7018
	3.13605	-8.66723	-8.93849	10.0457				3.13605	7.16371	5.49828	-11.8762				-25.9863	21.3516	13.1228	10.2588				-25.9863	19.3957	8.1313	14.6103
	4.70817	-8.60299	-8.58996	10.0226				4.70817	6.59175	4.81688	-12.1371				-28.2496	19.5907	11.3431	10.2889				-28.2496	19.1242	8.54378	14.0852
	4.97541	-7.98957	-7.52529	10.1523				4.97541	6.68496	4.68892	-12.2286				-27.8327	17.8664	9.61624	10.3162				-27.8327	18.8419	8.95283	13.5584
	4.95668	-6.55265	-5.38248	10.505				4.95668	7.7135	5.3346	-12.09				-27.1159	16.3259	8.09284	10.3358				-27.1159	18.5604	9.33178	13.0564
	4.29624	-5.082	-3.21379	10.8578				4.29624	8.73352	5.98407	-11.9552				-27.9975	18.2358	10.0892	10.2064				-27.9975	18.4074	9.16561	12.9875
	3.8439	-3.71575	-1.18607	11.2095				3.8439	9.68209	6.59623	-11.8283				-28.2662	20.2077	12.1086	10.0676				-28.2662	18.2536	8.9993	12.9188
	5.45168	-5.6265	-2.87735	11.8012				5.45168	9.38908	6.39257	-11.7398				-27.6317	22.1852	14.0955	9.92316				-27.6317	18.1028	8.83712	12.852
	6.1561	-7.49926	-4.51759	12.3899				6.1561	9.09691	6.18954	-11.6511				-26.777	24.4011	16.475	9.63805				-26.777	18.2298	8.94379	12.9662
	3.10729	-9.28893	-6.06933	12.9606				3.10729	8.81312	5.99238	-11.5646				-27.8542	26.7638	19.1034	9.28171				-27.8542	18.508	9.19915	13.1801
	1.98926	-11.3325	-8.35383	12.9411				1.98926	8.91959	5.9944	-11.7059				-26.9079	29.1297	21.7319	8.9348				-26.9079	18.7774	9.44926	13.3895
	2.94979	-13.4805	-10.9939	12.5982				2.94979	9.24134	6.10747	-11.9703				-27.9675	30.5127	23.3075	8.73533				-27.9675	19.2217	9.61897	13.8594
	3.54093	-15.5463	-13.5246	12.2657				3.54093	9.55592	6.21904	-12.2264				-29.3795	28.9872	21.7452	8.94614				-29.3795	20.1083	9.55313	15.0045
	4.05254	-16.7106	-15.1633	11.8626				4.05254	9.5648	6.08417	-12.6141				-29.8974	27.4886	20.1769	9.14714				-29.8974	20.9868	9.48649	16.1527
	6.85626	-15.3787	-14.3127	11.2912				6.85626	8.72455	5.28532	-13.3359				-29.0818	26.0526	18.6406	9.3338				-29.0818	21.8364	9.42073	17.2763
	6.31406	-14.0411	-13.4418	10.7155				6.31406	7.86503	4.48851	-14.058				-30.0583	26.3304	18.8542	9.43005				-30.0583	22.2757	9.27898	17.9031
	5.87737	-12.7284	-12.571	10.1495				5.87737	7.00717	3.71267	-14.7638				-29.7105	26.8125	19.2793	9.5135				-29.7105	22.661	9.12703	18.4676
	8.8718	-12.7713	-13.0694	9.83115				8.8718	6.35038	3.21028	-15.1051				-28.1058	27.2836	19.6955	9.59263				-28.1058	23.0331	8.9772	19.0182
	9.37275	-12.9752	-13.7333	9.54287				9.37275	5.71484	2.74286	-15.4032				-28.0005	27.2195	19.6467	9.58277				-28.0005	23.3056	8.89931	19.4059
	8.36481	-13.1716	-14.3822	9.26061				8.36481	5.08826	2.28736	-15.6961				-29.2513	26.6471	19.1549	9.48958				-29.2513	23.4795	8.89287	19.6298
	8.9332	-13.1113	-14.536	9.0326				8.9332	4.69446	1.99594	-15.9125				-29.4612	26.0898	18.6753	9.39822				-29.4612	23.6491	8.88659	19.8484
	11.2542	-12.8067	-14.212	8.86231				11.2542	4.53544	1.86713	-16.0498				-29.0088	25.6511	18.3958	9.21607				-29.0088	23.8089	8.84462	20.0674
	13.2442	-12.506	-13.894	8.69631				13.2442	4.37953	1.74146	-16.1839				-29.104	26.0203	19.4121	8.49596				-29.104	23.8846	8.58586	20.2553
	13.9194	-12.3968	-13.7805	8.47481				13.9194	4.16523	1.59394	-16.3023				-29.2431	26.3984	20.4149	7.79274				-29.2431	23.9558	8.33327	20.4383
	13.5967	-13.5293	-14.9706	7.93892				13.5967	3.6213	1.33231	-16.3042				-30.0259	26.8037	21.4525	7.07215				-30.0259	24.026	8.07452	20.6254
	11.2531	-14.6502	-16.1314	7.41712				11.2531	3.08903	1.07819	-16.307				-29.7189	26.2843	21.2671	6.68303				-29.7189	23.8945	7.88075	20.543
	13.1044	-15.8142	-17.3202	6.88379				13.1044	2.54247	0.819173	-16.3106				-29.2548	25.4939	20.7102	6.40009				-29.2548	23.7052	7.71171	20.3815
	11.8432	-15.8861	-17.4924	6.393				11.8432	2.27595	0.730447	-16.1769				-28.7607	24.6868	20.1362	6.1079				-28.7607	23.5113	7.53988	20.217
	12.1651	-15.6171	-17.3504	5.92722				12.1651	2.10072	0.69548	-16.004				-28.637	23.4555	19.2665	5.66033				-28.637	23.1049	7.22131	19.9131
	11.6736	-15.335	-17.2017	5.45298				11.6736	1.92228	0.660447	-15.8267				-28.2693	21.5857	17.9587	4.98119				-28.2693	22.3717	6.68115	19.3987
	12.021	-14.9281	-16.7704	4.94114				12.021	1.55029	0.49753	-15.5319				-28.2732	19.6789	16.6252	4.28598				-28.2732	21.6179	6.1334	18.8761
	11.9654	-14.3158	-15.9027	4.37816				11.9654	0.888786	0.141374	-15.0578				-23.7245	17.7746	15.2936	3.5886				-23.7245	20.8604	5.58927	18.3578
	13.8102	-13.6513	-15.0034	3.80434				13.8102	0.222196	-0.21674	-14.5702				-24.7079	15.5969	13.8014	2.78135				-24.7079	20.1525	4.96812	17.9319
	11.3859	-12.948	-14.0883	3.23228				11.3859	-0.436625	-0.569349	-14.0794				-23.6015	13.3756	12.2849	1.95523				-23.6015	19.4212	4.33925	17.5005
	10.3055	-12.1331	-12.916	2.69417				10.3055	-1.24937	-0.944582	-13.5718				-22.8924	11.1653	10.7815	1.13002				-22.8924	18.6838	3.71804	17.0741
	12.5252	-11.2477	-11.6977	2.14213				12.5252	-2.07101	-1.32129	-13.0473				-20.9157	11.1843	10.8982	1.02056				-20.9157	17.8379	3.5841	16.5719
	12.4183	-10.3115	-10.4608	1.58905				12.4183	-2.88182	-1.69053	-12.5183				-22.6296	12.5546	12.0014	1.3388				-22.6296	16.8921	3.75502	16.003
	13.3377	-10.4764	-10.6031	1.52722				13.3377	-3.05289	-2.4729	-12.5671				-19.235	13.937	13.1161	1.65773				-19.235	15.9433	3.95008	15.4363
	11.2328	-11.3186	-11.5855	1.76022				11.2328	-2.85192	-3.53538	-12.9787				-22.5986	15.3705	14.4119	1.87717				-22.5986	14.7913	4.2477	14.5921
	14.1458	-12.1426	-12.5603	1.99364				14.1458	-2.65419	-4.59207	-13.4026				-20.314	17.1412	16.4035	1.78774				-20.314	12.8359	4.86361	12.7278
	12.434	-13.1667	-13.4789	2.38324				12.434	-2.17959	-5.47373	-13.719				-17.2355	18.9546	18.3657	1.67585				-17.2355	10.8591	5.50916	10.8429
	14.2265	-15.0027	-14.3253	3.32114				14.2265	-0.7804	-5.91137	-13.7356				-18.4798	20.7635	20.2515	1.54509				-18.4798	8.90974	6.16738	8.98612
	13.1492	-16.8239	-15.1315	4.25585				13.1492	0.564804	-6.33578	-13.8181				-15.9336	22.4116	21.9729	1.39644				-15.9336	7.84222	5.68595	8.30029
	15.188	-18.5904	-15.8821	5.16469				15.188	1.82817	-6.73656	-13.9611				-13.9046	24.0392	23.6841	1.24255				-13.9046	6.93164	4.99472	7.82905
	13.9041	-20.0208	-17.6773	4.83537				13.9041	1.26967	-7.56472	-13.7906				-11.1029	25.6471	25.3768	1.08731				-11.1029	6.03523	4.31496	7.3695
	15.0773	-21.3779	-19.6594	4.28731				15.0773	0.405454	-8.46124	-13.5581				-9.20591	24.98	25.405	0.262622				-9.20591	5.27603	3.57918	6.87972
	16.0952	-22.6959	-21.6023	3.75364				16.0952	-0.424551	-9.33026	-13.3308				-12.2331	21.7274	23.5376	-1.28948				-12.2331	4.69663	2.8194	6.38252
	13.479	-23.2622	-21.9161	3.14303				13.479	-1.15627	-9.79215	-12.8361				-8.11201	18.5496	21.733	-2.796				-8.11201	4.12733	2.09839	5.91587
	16.0418	-22.8942	-20.3578	2.44539				16.0418	-1.76383	-9.77507	-12.0441				-7.48665	15.462	20.0117	-4.26906				-7.48665	3.56896	1.36614	5.50673
	15.7206	-22.4516	-18.8301	1.744				15.7206	-2.35133	-9.74681	-11.2615				-7.49754	13.9346	19.294	-5.17149				-7.49754	3.26714	0.510649	5.57109
	17.7277	-21.9697	-17.3771	1.00918				17.7277	-2.99508	-9.74625	-10.476				-5.32798	12.4405	18.5897	-6.05235				-5.32798	2.96032	-0.311352	5.64494
	19.4446	-21.9006	-17.0432	0.312965				19.4446	-4.07772	-10.1026	-9.92446				-4.42277	10.9164	17.8686	-6.94909				-4.42277	2.63563	-1.13463	5.73137
	19.3832	-21.8194	-16.7124	-0.371497				19.3832	-5.13577	-10.4401	-9.38583				-4.45058	8.99633	16.3198	-7.3503				-4.45058	2.46697	-1.83231	5.9973
	19.9188	-21.7235	-16.3703	-1.07368				19.9188	-6.21426	-10.7739	-8.83747				-3.40658	6.99105	14.4897	-7.55918				-3.40658	2.35577	-2.46776	6.32425
	20.0279	-20.4932	-15.4862	-1.72964				20.0279	-7.25675	-11.2232	-8.54686				-3.18236	4.96949	12.6179	-7.77846				-3.18236	2.23199	-3.11431	6.66016
	18.4037	-18.8385	-14.3932	-2.35048				18.4037	-8.26449	-11.7047	-8.36374				-3.12292	3.99373	11.6903	-7.91125				-3.12292	2.10653	-3.59865	6.83383
	21.5616	-17.1161	-13.246	-2.98308				21.5616	-9.29726	-12.192	-8.18025				-2.63891	4.97319	12.5732	-7.86958				-2.63891	1.99396	-3.77099	6.69998
	19.6917	-16.2602	-12.8056	-3.41347				19.6917	-10.0149	-12.3799	-7.88862				-0.483025	5.94029	13.4467	-7.82882				-0.483025	1.88351	-3.93062	6.57635
	19.5118	-17.1083	-13.7628	-3.46033				19.5118	-10.1252	-12.0017	-7.38368				-1.10996	6.93597	14.3478	-7.78723				-1.10996	1.77049	-4.08426	6.45775
	17.4114	-17.9315	-14.697	-3.50633				17.4114	-10.2333	-11.6292	-6.88683				-1.78439	6.86032	14.1766	-7.92944				-1.78439	1.94527	-4.64643	7.05704
	19.5389	-18.7653	-15.6484	-3.55342				19.5389	-10.3435	-11.247	-6.377				-2.15476	6.75029	13.9553	-8.08458				-2.15476	2.1148	-5.19887	7.6673
	18.195	-18.6484	-16.3898	-4.30939				18.195	-11.4179	-11.4744	-6.17095				-3.72447	6.63733	13.7091	-8.25495				-3.72447	2.27824	-5.75729	8.29697
	18.5014	-18.5023	-17.1019	-5.06745				18.5014	-12.5046	-11.7127	-5.99094				-4.04215	5.02078	12.3859	-8.84113				-4.04215	2.33304	-6.10333	8.6717
	19.1653	-18.3519	-17.8306	-5.84431				19.1653	-13.6296	-11.9537	-5.81667				-1.62416	2.44125	10.3769	-9.691				-1.62416	2.31707	-6.30229	8.86364
	19.6368	-17.4584	-17.358	-6.66987				19.6368	-14.3284	-12.2478	-5.82429				-1.72033	-0.183198	8.31977	-10.565				-1.72033	2.29937	-6.50718	9.06071
	17.9466	-16.0393	-16.0608	-7.5098				17.9466	-14.7182	-12.5723	-5.94967				-1.27126	-1.86	7.07224	-11.3187				-1.27126	2.2954	-6.73949	9.29396
	20.5984	-14.5228	-14.6962	-8.3725				20.5984	-15.1189	-12.9051	-6.07839				-0.0350868	-0.102877	8.80677	-11.6074				-0.0350868	2.34348	-7.06064	9.64976
	22.8292	-13.7209	-14.1278	-9.17868				22.8292	-15.5784	-13.2302	-6.18677				-1.32605	1.74245	10.6282	-11.9079				-1.32605	2.38922	-7.38994	10.0145
	23.1664	-15.7219	-16.5722	-9.74778				23.1664	-16.2343	-13.5163	-6.21912				-0.897962	3.62695	12.4864	-12.2127				-0.897962	2.43133	-7.71882	10.3788
	25.3581	-17.7424	-19.0685	-10.3298				25.3581	-16.9096	-13.809	-6.25471				-0.147812	1.77394	10.9991	-12.8432				-0.147812	1.78897	-8.73927	10.7378
	25.6232	-19.7325	-21.5571	-10.9096				25.6232	-17.5868	-14.1007	-6.29275				0.88115	-0.894416	8.77946	-13.5592				0.88115	0.960833	-9.93976	11.1069
	27.4843	-18.7406	-20.628	-11.5061				27.4843	-19.2419	-15.1902	-6.21757				-0.757211	-3.53314	6.5774	-14.2745				-0.757211	0.107175	-11.1458	11.4764
	27.0699	-17.0473	-18.9342	-12.1262				27.0699	-21.1444	-16.4701	-6.11986				-0.806055	-5.32359	4.91812	-14.6338				-0.806055	-0.321367	-11.9313	11.8695
	28.4643	-15.2909	-17.2104	-12.7492				28.4643	-23.0414	-17.7416	-6.02618				-0.999356	-6.1595	3.83869	-14.5629				-0.999356	-0.212959	-12.2223	12.315
	28.6847	-13.7995	-15.9058	-13.1493				28.6847	-24.3466	-18.6913	-6.15933				-0.773084	-6.9808	2.76338	-14.4925				-0.773084	-0.10713	-12.5129	12.7622
	29.4676	-12.6207	-15.0863	-13.2863				29.4676	-24.9805	-19.2932	-6.58238				-1.44087	-7.68344	1.80049	-14.409				-1.44087	-0.0141495	-12.7587	13.1482
	29.3874	-11.4319	-14.257	-13.4233				29.3874	-25.6162	-19.8955	-7.00408				-1.15948	-6.90508	2.27379	-14.0557				-1.15948	-0.0616373	-12.3507	12.626
	29.6043	-10.3433	-13.5071	-13.5392				29.6043	-26.1598	-20.407	-7.36398				-0.581228	-6.12537	2.74882	-13.7015				-0.581228	-0.113435	-11.942	12.1068
	30.124	-10.6597	-13.9636	-13.342				30.124	-25.3294	-19.5758	-6.83988				0.0725041	-5.36138	3.21512	-13.3542				0.0725041	-0.168345	-11.5419	11.6019
	29.7737	-10.9712	-14.4181	-13.1464				29.7737	-24.5016	-18.7453	-6.31335				-0.495485	-5.65791	2.73547	-13.3151				-0.495485	-0.322956	-11.0924	10.9465
	30.6508	-11.2711	-14.8608	-12.9565				30.6508	-23.6945	-17.9335	-5.79589				2.42681	-6.46003	1.80026	-13.427				2.42681	-0.529822	-10.6246	10.2217
	29.289	-10.7568	-14.5947	-13.0745				29.289	-22.7124	-17.1767	-5.30885				1.71996	-7.23566	0.886412	-13.5374				1.71996	-0.739705	-10.1695	9.51238
	29.028	-9.84474	-13.9801	-13.3402				29.028	-21.6571	-16.4518	-4.84254				-1.03208	-8.00793	-0.190276	-13.371				-1.03208	-0.998753	-9.75438	8.79858
	27.8323	-8.94316	-13.3707	-13.5996				27.8323	-20.6305	-15.7422	-4.38788				0.874277	-8.71538	-1.5807	-12.5476				0.874277	-1.34935	-9.45177	8.11154
	29.2992	-7.64789	-12.3339	-13.6053				29.2992	-19.6583	-15.083	-3.93333				-0.140508	-9.35236	-2.90434	-11.7418				-0.140508	-1.69625	-9.1575	7.44065
	27.549	-5.49679	-10.3332	-13.0089				27.549	-18.8577	-14.5797	-3.5008				-0.27716	-9.94823	-4.22327	-10.9142				-0.27716	-2.05637	-8.85723	6.75325
	25.7836	-3.39473	-8.3585	-12.4313				25.7836	-18.081	-14.0881	-3.07959				1.99004	-7.55458	-1.72321	-9.85571				1.99004	-2.37262	-8.16831	5.71004
	25.2229	-1.24046	-6.31175	-11.8441				25.2229	-17.2903	-13.5842	-2.64905				1.27391	-4.9105	0.983016	-8.83374				1.27391	-2.69618	-7.47127	4.66182
	22.9568	-3.40795	-7.39229	-10.316				22.9568	-15.7569	-12.6584	-2.16991				0.222983	-2.12838	3.71298	-7.81569				0.222983	-3.04925	-6.76228	3.58293
	24.5601	-5.76255	-8.60417	-8.73536				24.5601	-14.2174	-11.7188	-1.70615				0.224222	-0.510962	5.06724	-6.97018				0.224222	-3.40173	-6.02211	2.49056
	20.8486	-8.06944	-9.75071	-7.0966				20.8486	-12.654	-10.7509	-1.2373				2.00845	0.0732278	5.2847	-6.275				2.00845	-3.74879	-5.28216	1.42199
	18.2833	-8.97584	-9.93236	-5.87395				18.2833	-11.0577	-9.6023	-0.6372				1.42232	0.673799	5.49778	-5.56701				1.42232	-4.12951	-4.5336	0.326651
	18.7119	-8.7782	-9.37591	-5.0338				18.7119	-9.48576	-8.33931	0.0575015				1.02581	1.09878	5.55403	-4.93				1.02581	-4.61535	-3.87096	-0.775433
	17.336	-8.57683	-8.80207	-4.16802				17.336	-7.89253	-7.03835	0.772542				0.931298	0.645923	4.88457	-4.63332				0.931298	-5.50101	-3.59396	-1.88412
	15.3225	-8.25877	-8.15922	-3.39437				15.3225	-6.42726	-5.7942	1.55212				0.667783	0.192704	4.20806	-4.32965				0.667783	-6.41611	-3.30502	-3.00431
	13.6102	-7.36288	-7.19907	-3.11171				13.6102	-5.53988	-4.8833	2.63007				1.45671	-0.249515	3.5412	-4.02624				1.45671	-7.33904	-3.011	-4.10807
	10.5694	-6.44386	-6.21104	-2.82202				10.5694	-4.64328	-3.95015	3.74987				0.788778	-0.509668	4.28904	-4.76465				0.788778	-7.45439	-2.24774	-5.18144
	11.2496	-5.52354	-5.21828	-2.53217				11.2496	-3.75927	-3.01701	4.88611				2.2081	-0.692649	5.42601	-5.81751				2.2081	-7.38376	-1.14669	-6.09776
	7.4169	-6.64453	-5.23042	-2.22323				7.4169	-2.14415	-3.28907	3.47552				4.61869	-0.835654	6.54154	-6.87936				4.61869	-7.3539	0.167732	-6.80376
	9.13045	-8.38968	-5.5035	-1.92585				9.13045	-0.299449	-3.88996	1.23089				3.17426	-0.36532	7.47372	-7.13225				3.17426	-7.74499	1.59582	-7.87795
	8.18326	-10.1703	-5.7573	-1.65638				8.18326	1.52803	-4.45994	-1.10489				3.54124	0.909177	8.12018	-6.25445				3.54124	-8.71819	2.9215	-9.68366
	6.0552	-11.3385	-5.6353	-0.869354				6.0552	3.56824	-4.24569	-2.56915				3.0329	2.2162	8.73243	-5.37819				3.0329	-9.78351	4.28277	-11.5295
	5.05878	-11.5805	-5.00324	0.664015				5.05878	5.82748	-2.97342	-2.73348				5.8436	3.5153	9.30856	-4.5549				5.8436	-10.9276	5.6243	-13.3702
	2.76306	-11.8182	-4.34567	2.24702				2.76306	8.05857	-1.64099	-2.95449				5.30548	4.53296	10.2639	-4.5779				5.30548	-12.409	6.32841	-15.1778
	2.77647	-12.0764	-3.71903	3.80711				2.77647	10.1735	-0.304412	-3.21942				3.28557	5.5901	11.2327	-4.60766				3.28557	-13.9489	7.05452	-17.0312
	1.09063	-13.1897	-4.19461	4.34136				1.09063	11.3965	0.255584	-3.22602				3.14786	6.66152	12.1915	-4.64368				3.14786	-15.5105	7.78525	-18.8855
	2.89339	-14.3197	-4.66887	4.88843				2.89339	12.5961	0.839243	-3.26716				6.45151	5.2793	10.8303	-4.50243				6.45151	-16.344	7.46047	-19.7254
	-0.609046	-15.4395	-5.13065	5.43524				-0.609046	13.7407	1.43341	-3.34398				5.90402	2.59589	8.26494	-4.25862				5.90402	-16.8064	6.58056	-19.991
	-1.45378	-13.9383	-3.3339	5.87012				-1.45378	13.7178	1.64888	-2.50682				4.23837	0.0201017	5.82588	-4.01533				4.23837	-17.2764	5.7386	-20.196
	-3.28996	-10.909	-0.196245	6.25881				-3.28996	13.0842	1.67864	-1.1249				6.33026	-2.26916	3.80363	-3.943				6.33026	-17.6041	5.07585	-20.3463
	-1.99149	-7.79632	3.02476	6.6489				-1.99149	12.4558	1.72839	0.265464				10.7692	-4.22048	2.44979	-4.34689				10.7692	-17.5422	4.80276	-20.4261
	-4.36106	-5.05936	5.7418	6.75007				-4.36106	12.0345	2.18078	1.77878				9.12828	-6.13109	1.11282	-4.75456				9.12828	-17.4805	4.59254	-20.3817
	-6.24448	-3.32036	7.08921	6.04446				-6.24448	12.1464	3.77327	3.75819				8.79662	-7.95398	-0.174511	-5.15613				8.79662	-17.4205	4.4485	-20.2189
	-7.98028	-1.52134	8.47226	5.34107				-7.98028	12.2584	5.37996	5.72664				7.05456	-5.99477	0.981811	-4.56541				7.05456	-17.5704	4.50342	-20.4209
	-7.69009	0.295363	9.85807	4.65652				-7.69009	12.3678	6.95945	7.62898				7.14953	-3.46015	2.54793	-3.8343				7.14953	-17.7519	4.62089	-20.582
	-8.47657	-1.31008	7.9707	4.85208				-8.47657	12.7371	8.72845	9.5668				8.78004	-0.942472	4.1421	-3.11993				8.78004	-17.9314	4.77547	-20.6349
	-8.9429	-3.30333	5.66926	5.16474				-8.9429	13.1381	10.5231	11.511				8.34723	-0.294033	3.86433	-2.15976				8.34723	-17.9621	4.84204	-20.4615
	-8.81443	-5.15309	3.47137	5.46307				-8.81443	13.525	12.2756	13.4045				7.43615	-1.49832	1.69035	-0.968676				7.43615	-17.8374	4.80603	-20.1075
	-9.66029	-4.35684	3.68743	5.78879				-9.66029	13.655	13.5443	14.9414				8.07903	-2.51081	-0.324435	0.19325				8.07903	-17.7165	4.79679	-19.7227
	-8.88364	-0.933312	6.40962	6.12469				-8.88364	13.52	14.2818	16.0642				7.10286	-3.48061	-2.19027	1.20145				7.10286	-17.4957	4.7815	-19.1855
	-10.2162	2.3825	9.13806	6.43252				-10.2162	13.3881	14.9977	17.1364				7.31806	-5.05873	-3.30365	0.844876				7.31806	-16.5766	4.55476	-17.8855
	-11.7323	5.56743	11.8948	6.66952				-11.7323	13.1743	15.6335	18.1363				7.53212	-6.55308	-4.34229	0.497171				7.53212	-15.6896	4.3522	-16.6007
	-13.3379	7.32727	13.7607	6.46281				-13.3379	12.3819	15.5629	18.5236				7.55665	-8.03368	-5.35486	0.141376				7.55665	-14.7917	4.16385	-15.2698
	-12.0091	9.0994	15.6133	6.2603				-12.0091	11.5847	15.493	18.8548				8.11161	-7.10414	-4.74859	0.546696				8.11161	-14.0702	4.44943	-14.7088
	-13.1991	10.9713	17.5427	6.05208				-13.1991	10.7443	15.4197	19.1471				8.06232	-5.35638	-3.61363	1.19197				8.06232	-13.4295	4.87149	-14.4223
	-15.8496	10.0776	17.0171	6.69781				-15.8496	11.0526	16.2583	19.2339				7.65876	-3.51941	-2.4399	1.84584				7.65876	-12.7813	5.28973	-14.1285
	-15.0419	8.32478	15.707	7.61949				-15.0419	11.7536	17.3887	19.258				7.35924	-1.68073	-1.27104	2.44476				7.35924	-12.1677	5.76242	-13.9424
	-15.3978	6.59869	14.4038	8.56896				-15.3978	12.4824	18.5524	19.2807				7.46295	0.0837142	-0.129512	2.94642				7.46295	-11.6316	6.31561	-13.9424
	-15.9138	4.92623	13.0073	9.36929				-15.9138	13.4057	19.8918	19.2941				4.14278	1.9305	1.07187	3.45939				4.14278	-11.1069	6.85194	-13.9424
	-17.5718	3.32966	11.4567	9.89263				-17.5718	14.6252	21.4953	19.2941				3.69962	3.8143	2.30405	3.97136				3.69962	-10.6074	7.35689	-13.9424
	-15.9378	1.75408	9.90081	10.4299				-15.9378	15.883	23.1498	19.2941				1.50847	2.71377	1.36112	3.94714				1.50847	-10.5023	7.34118	-13.7043
	-16.318	0.237723	8.37727	10.9685				-16.318	17.1492	24.8162	19.2941				1.50458	1.58827	0.411456	3.91675				1.50458	-10.3994	7.32348	-13.4548
	-18.7995	1.53225	9.88263	11.0515				-18.7995	17.0023	24.9371	19.5844				-1.04172	0.490476	-0.503251	3.88612				-1.04172	-10.2967	7.30927	-13.2008
	-19.0074	2.90516	11.4694	11.1315				-19.0074	16.8372	25.0444	19.8801				1.1238	-0.231424	-1.15286	3.90888				1.1238	-10.7741	7.20113	-13.3489
	-19.5945	4.30499	13.0794	11.2116				-19.5945	16.6711	25.1513	20.1726				1.26231	-0.737677	-1.66463	3.96711				1.26231	-11.6553	7.03002	-13.7609
	-19.4951	5.34073	14.1072	11.1374				-19.4951	16.2884	24.9541	20.7856				2.66159	-1.23214	-2.16987	4.02431				2.66159	-12.5391	6.86502	-14.1609
	-20.5588	6.16778	14.7853	10.9585				-20.5588	15.7603	24.5491	21.6401				5.65286	-1.8709	-2.62176	3.88221				5.65286	-13.7311	6.85023	-14.9225
	-21.3986	6.99884	15.469	10.7796				-21.3986	15.2473	24.1448	22.4999				6.92399	-3.1256	-2.93983	3.01052				6.92399	-16.1515	7.35541	-17.0716
	-20.3159	7.7124	16.1071	10.5471				-20.3159	15.118	24.2391	23.6991				6.60323	-4.37744	-3.2542	2.1413				6.60323	-18.5935	7.85457	-19.1704
	-20.4623	8.05841	16.6206	10.0963				-20.4623	16.2659	26.1478	26.2613				8.57715	-5.60151	-3.55867	1.29184				8.57715	-21.0061	8.33736	-21.1735
	-21.4119	8.41584	17.137	9.64023				-21.4119	17.3258	28.0607	28.9006				18.8354	-12.8353	-1.81184	-8.55916				18.8354	-17.6321	1.64743	-18.397
	-20.4679	8.77723	17.6461	9.18783				-20.4679	18.2762	29.9394	31.569				21.1022	-12.1203	-1.11391	-8.70904				21.1022	-16.6553	1.75931	-17.5269
	-8.72733	1.21406	10.0166	1.04905				-8.72733	7.95723	0.874546	5.96605				17.6987	-11.3673	-0.375313	-8.86292				17.6987	-15.6561	1.87517	-16.6349
	-8.57493	-0.114157	8.63299	0.768818				-8.57493	7.87791	1.45865	6.08723				16.4536	-10.3022	0.341189	-8.63521				16.4536	-14.474	1.93562	-15.5226
	-8.23367	-1.45768	7.23006	0.482693				-8.23367	7.80255	2.05641	6.19622				17.2949	-8.06121	0.851859	-6.84087				17.2949	-12.5767	1.77211	-13.5384
	-8.12686	-2.5031	6.09847	0.544961				-8.12686	7.59272	2.62723	6.3028				17.21	-5.75872	1.36315	-4.99212				17.21	-10.6405	1.62182	-11.4997
	-10.3164	-2.359	6.06577	2.01895				-10.3164	6.80616	3.07258	6.41188				15.2646	-3.44992	1.86234	-3.13363				15.2646	-8.71211	1.48905	-9.45664
	-11.5744	-2.21514	6.03827	3.50918				-11.5744	5.98201	3.52991	6.45614				14.2746	-2.91545	1.69197	-2.42724				14.2746	-7.51128	1.52065	-8.26501
	-10.8167	-2.07265	6.01653	4.98225				-10.8167	5.1383	3.98795	6.43398				12.6073	-2.77348	1.35875	-1.96793				12.6073	-6.43833	1.59557	-7.22657
	-9.04645	-1.54656	6.1422	5.22032				-9.04645	4.7989	4.5634	6.5684				13.0632	-2.62609	1.02412	-1.51024				13.0632	-5.36787	1.67721	-6.18488
	-10.8845	-0.917539	6.30802	5.17543				-10.8845	4.56891	5.18628	6.73145				8.47635	-2.61376	0.471167	-0.924123				8.47635	-4.35718	1.94445	-5.36276
	-10.7873	-0.29553	6.47583	5.12601				-10.7873	4.3395	5.80785	6.87017				8.91028	-2.76513	-0.393009	-0.124203				8.91028	-3.36868	2.46513	-4.78931
	-10.719	0.701867	7.13789	5.27503				-10.719	4.50058	6.73439	7.04244				7.32189	-2.88057	-1.2307	0.677988				7.32189	-2.38673	2.97341	-4.21054
	-12.6624	2.26702	8.52204	5.70486				-12.6624	5.21437	8.13793	7.28887				7.95016	-2.99358	-2.04655	1.448				7.95016	-1.45939	3.43857	-3.65051
	-12.9235	3.81493	9.92156	6.12992				-12.9235	5.94413	9.54718	7.52461				8.45351	-4.04729	-3.55679	1.79714				8.45351	-1.21871	3.37672	-3.35945
	-13.4424	5.33589	11.3099	6.50815				-13.4424	6.63924	10.8775	7.73388				6.78868	-5.01569	-5.04216	2.13579				6.78868	-0.978629	3.31484	-3.06859
	-13.2308	7.68805	12.974	5.9668				-13.2308	6.42078	10.7819	7.641				7.22769	-5.87622	-6.46508	2.45609				7.22769	-0.744852	3.25442	-2.78483
	-12.4164	10.063	14.6966	5.41859				-12.4164	6.20109	10.6865	7.54733				6.81996	-5.86666	-5.64381	1.79473				6.81996	-2.49691	3.2192	-4.4963
	-13.1103	12.4017	16.4369	4.87696				-13.1103	5.98546	10.5934	7.45512				5.71489	-5.26292	-3.58596	0.608506				5.71489	-5.29778	3.20799	-7.26481
	-13.2409	10.9256	15.3454	4.9532				-13.2409	6.49702	10.1911	7.86072				5.71917	-4.48896	-1.51941	-0.561848				5.71917	-8.04067	3.20879	-9.9777
	-14.1764	7.38136	12.828	5.33099				-14.1764	7.36642	9.62771	8.45463				6.43356	-4.04076	-0.0259861	-1.63476				6.43356	-10.6988	3.1853	-12.5609
	-14.6585	3.88771	10.4796	5.66423				-14.6585	8.18859	9.07732	8.94882				5.01546	-4.89152	-0.258939	-2.36074				5.01546	-12.949	3.07218	-14.6253
	-14.5411	1.2879	8.70352	5.62591				-14.5411	8.89385	8.59443	9.49784				13.9172	-5.73646	-0.501038	-3.08724				13.9172	-15.1868	2.95907	-16.6829
	-15.1269	1.26374	8.31495	4.69295				-15.1269	9.30164	8.3207	10.3463				15.5223	-6.57053	-0.750488	-3.8096				15.5223	-17.3984	2.84666	-18.7208
	-15.2889	1.23979	7.93078	3.76921				-15.2889	9.71101	8.04889	11.1814				16.896	-6.72266	-0.802299	-3.87531				16.896	-17.7369	3.08044	-19.1427
	-14.3046	1.21607	7.55339	2.85986				-14.3046	10.1213	7.78063	11.9999				19.1898	-6.79968	-0.831784	-3.86912				19.1898	-17.8727	3.35175	-19.3704
	-11.6225	1.29222	7.74894	2.91676				-11.6225	10.5926	8.69619	12.8239				19.5074	-6.8749	-0.860659	-3.86358				19.5074	-18.0092	3.61697	-19.5771
	-12.1669	1.37929	8.00689	3.07934				-12.1669	11.0652	9.74144	13.652				21.3906	-6.08425	-0.0502793	-3.95776				21.3906	-18.3349	3.86906	-20.0417
	-12.82	1.46459	8.2593	3.2384				-12.82	11.5233	10.7655	14.4667				23.1588	-4.44196	1.58648	-4.1424				23.1588	-18.8317	4.106	-20.748
	-12.172	0.186361	7.07234	3.21478				-12.172	12.029	11.4229	14.8609				22.3778	-2.75919	3.26357	-4.32307				22.3778	-19.3223	4.33898	-21.4381
	-12.4414	-2.29114	4.61123	3.02249				-12.4414	12.5655	11.73	14.8498				27.7706	-1.47548	4.51451	-4.42385				27.7706	-19.7478	4.52719	-22.0496
	-11.3562	-4.66299	2.25165	2.83441				-11.3562	13.0804	12.0315	14.8304				28.8141	-3.03365	2.7661	-4.04398				28.8141	-19.7145	4.43095	-22.1089
	-11.1551	-6.32529	0.581947	2.71319				-11.1551	13.4935	12.1495	14.6487				28.2902	-4.478	1.1305	-3.67275				28.2902	-19.6826	4.35	-22.1349
	-9.55265	-3.87291	2.93666	2.9977				-9.55265	13.3121	11.1727	13.5848				24.3878	-5.8746	-0.46765	-3.29207				24.3878	-19.6505	4.28045	-22.1287
	-10.4466	-1.44246	5.28075	3.27475				-10.4466	13.1344	10.2199	12.5423				23.7768	-6.69634	-1.66425	-3.06234				23.7768	-18.9523	4.20923	-21.3987
	-11.2879	1.08561	7.73027	3.55787				-11.2879	12.9519	9.24489	11.4714				22.8554	-7.31964	-2.75872	-2.9004				22.8554	-18.0813	4.14035	-20.4831
	-12.8691	2.83531	8.54783	2.91091				-12.8691	12.688	9.18848	11.2956				22.0184	-7.92853	-3.91815	-2.75528				22.0184	-17.1866	4.07346	-19.5395
	-12.1054	4.31646	8.89009	2.00949				-12.1054	12.4042	9.39809	11.3685				23.6186	-7.98077	-4.32203	-2.603				23.6186	-15.8207	3.72041	-17.9441
	-9.27497	5.84842	9.27262	1.07881				-9.27497	12.1081	9.61389	11.4274				17.6152	-7.23229	-3.55392	-2.4207				17.6152	-13.8203	2.92684	-15.421
	-8.43587	6.37348	9.29999	0.73475				-8.43587	11.1878	9.10766	11.048				18.043	-6.44983	-2.76973	-2.23848				18.043	-11.826	2.08729	-12.839
	-10.5777	5.38582	8.76792	1.27756				-10.5777	9.28146	7.5468	10.0378				13.4798	-5.65751	-1.99131	-2.06514				13.4798	-9.91237	1.2304	-10.2892
	-8.51862	4.38633	8.23562	1.8363				-8.51862	7.20714	5.95919	8.99019				13.5771	-5.15048	-1.31129	-2.16536				13.5771	-9.31836	0.874567	-9.43465
	-8.68331	3.40073	7.71476	2.39209				-8.68331	5.03773	4.39714	7.93583				13.5139	-4.61715	-0.611835	-2.26973				13.5139	-8.71968	0.504982	-8.55869
	-6.52932	2.41874	7.06669	2.62471				-6.52932	4.18802	3.6483	7.42486				13.8127	-4.06998	0.0902898	-2.37585				13.8127	-8.13105	0.130368	-7.68227
	-6.32966	1.41873	6.41278	2.86226				-6.32966	3.30303	2.88359	6.90367				14.7167	-3.76983	0.486906	-2.51146				14.7167	-8.03481	-0.137884	-7.36395
	-6.2836	0.424727	5.76877	3.09903				-6.2836	2.40353	2.12124	6.38448				14.7716	-3.60773	0.719553	-2.67				14.7716	-8.22345	-0.352591	-7.36394
	-6.31347	-0.19972	5.15025	2.99576				-6.31347	1.87271	1.61738	6.19641				16.2693	-3.44307	0.955334	-2.82963				16.2693	-8.41346	-0.568566	-7.36395
	-5.24779	-0.631842	4.51982	2.68786				-5.24779	1.5459	1.24669	6.19642				17.199	-3.45382	0.991712	-2.94207				17.199	-8.71905	-0.632621	-7.61489
	-8.03863	-1.06379	3.89051	2.3805				-8.03863	1.21974	0.876714	6.19641				15.8491	-4.01707	0.401877	-2.9151				15.8491	-9.42196	-0.224336	-8.67891
	-7.52301	-1.1943	3.58591	2.13322				-7.52301	1.2229	0.729441	6.25678				18.4868	-4.57144	-0.182178	-2.88833				18.4868	-10.1375	0.182611	-9.74483
	-10.6122	-0.389859	4.26919	2.04777				-10.6122	2.24556	1.2649	6.50614				17.5011	-5.10387	-0.746619	-2.8624				17.5011	-10.8482	0.578515	-10.7871
	-10.0761	0.420778	4.95869	1.96225				-10.0761	3.24967	1.80297	6.74537				15.6941	-5.75591	-1.38952	-2.92232				15.6941	-10.5695	-0.000296733	-10.0206
	-9.2623	1.21814	5.63785	1.87871				-9.2623	4.21163	2.3308	6.96912				16.8554	-6.41644	-2.04046	-2.99748				16.8554	-10.1517	-0.749969	-8.95485
	-11.6012	2.08141	6.28099	1.63772				-11.6012	3.08077	1.44158	6.80555				18.5481	-7.05208	-2.6738	-3.07214				18.5481	-9.7712	-1.49292	-7.91415
	-10.7113	2.96071	6.92291	1.37156				-10.7113	1.57768	0.325888	6.56908				18.9124	-7.78973	-3.2803	-3.16288				18.9124	-9.59711	-1.75106	-7.50544
	-9.19378	3.83029	7.55926	1.11151				-9.19378	0.0802692	-0.757138	6.32799				17.6776	-8.61875	-3.82901	-3.26958				17.6776	-9.63277	-1.46462	-7.79845
	-7.98998	4.76995	8.55635	1.10471				-7.98998	-0.46306	-1.12044	6.23087				18.1532	-9.41764	-4.34595	-3.37626				18.1532	-9.67116	-1.18537	-8.08576
	-8.25794	5.76606	9.92184	1.37474				-8.25794	0.0732409	-0.691416	6.30162				15.4984	-9.88732	-4.56647	-3.48626				15.4984	-9.68353	-0.957308	-8.30395
	-7.43413	6.75805	11.268	1.63858				-7.43413	0.596515	-0.269798	6.37021				18.5576	-7.39054	-2.20872	-3.58773				18.5576	-9.44049	-1.20583	-7.8769
	-9.63103	7.24047	12.0539	1.8489				-9.63103	1.01783	0.0555362	6.38878				14.695	-4.74749	0.307689	-3.68776				14.695	-9.20699	-1.44953	-7.45876
	-6.52027	3.16005	7.82779	1.56084				-6.52027	0.489786	-0.527479	5.97615				13.9075	-1.8332	3.10134	-3.79184				13.9075	-8.97023	-1.70177	-7.0266
	-8.04182	-0.656733	3.83875	1.28061				-8.04182	-0.0284767	-1.09466	5.57663				13.4134	-2.19636	2.80255	-3.95586				13.4134	-8.86763	-1.69319	-6.97387
	-5.73492	-4.4266	-0.137878	0.992829				-5.73492	-0.565462	-1.67724	5.16822				13.4355	-3.7493	1.35962	-4.13961				13.4355	-8.8159	-1.58369	-7.05376
	-5.63935	-4.16904	-0.195666	0.584331				-5.63935	-0.570233	-2.0053	4.70827				13.6395	-5.30202	-0.101887	-4.33102				13.6395	-8.76326	-1.46407	-7.12751
	-5.74243	-2.45561	1.17046	0.143115				-5.74243	-0.380846	-2.23291	4.23892				13.7807	-5.87452	-0.531118	-4.49317				13.7807	-8.78724	-1.41101	-7.20521
	-7.08787	-0.65338	2.60744	-0.308649				-7.08787	-0.186509	-2.46639	3.75527				16.3324	-4.63764	0.957516	-4.59911				16.3324	-8.95462	-1.49455	-7.30317
	-6.58999	-0.144176	3.08518	-0.45764				-6.58999	-0.0885985	-2.7014	3.41051				16.2002	-3.38167	2.4241	-4.70703				16.2002	-9.11807	-1.57614	-7.39842
	-5.98339	-2.11569	1.72918	-0.0398991				-5.98339	-0.171623	-2.93966	3.32934				16.3931	-2.04767	3.93868	-4.82219				16.3931	-9.28561	-1.65978	-7.49564
	-5.4621	-4.01106	0.441737	0.366836				-5.4621	-0.252298	-3.17215	3.24967				18.5158	-1.84791	4.19768	-4.94308				18.5158	-9.71326	-1.75626	-7.84102
	-6.3821	-5.92363	-0.841522	0.782338				-6.3821	-0.334573	-3.41022	3.16763				13.6462	-1.68616	4.41433	-5.06168				13.6462	-10.1384	-1.85094	-8.18567
	-7.5138	-6.31494	-1.34088	0.580423				-7.5138	-0.327627	-3.54258	3.32988				17.5276	-1.51896	4.63791	-5.18369				17.5276	-10.5738	-1.94805	-8.53876
	-10.8968	-6.65159	-1.80483	0.365102				-10.8968	-0.317047	-3.66848	3.49566				18.5667	-4.08436	2.03834	-5.11431				18.5667	-10.9136	-1.96547	-8.86515
	-8.07131	-6.99621	-2.27951	0.14479				-8.07131	-0.305012	-3.79733	3.66556				18.5021	-8.07813	-2.13559	-4.9206				18.5021	-11.1815	-1.929	-9.16599
	-10.0996	-3.74326	0.535006	-0.120106				-10.0996	-0.195883	-3.84782	3.7688				17.4075	-11.6681	-6.03493	-4.7252				17.4075	-11.4562	-1.89151	-9.47431
	-6.74613	2.09616	5.7179	-0.410196				-6.74613	-0.025353	-3.84469	3.82427				16.8678	-14.0481	-8.70754	-4.64651				16.8678	-11.6047	-1.83479	-9.67204
	-6.95969	8.43059	11.3565	-0.709261				-6.95969	0.148794	-3.84144	3.88027				17.6963	-13.9038	-8.34892	-4.97321				17.6963	-11.3025	-1.71179	-9.47329
	-10.9235	13.4254	15.7718	-1.02402				-10.9235	0.303283	-3.8067	3.8934				17.6216	-13.7414	-7.96565	-5.30846				17.6216	-10.993	-1.58589	-9.26953
	-8.36821	12.4196	14.6416	-1.38054				-8.36821	0.386978	-3.66123	3.75753				18.3934	-13.5642	-7.56656	-5.64428				18.3934	-10.6835	-1.46009	-9.06561
	-7.15637	11.3883	13.4893	-1.74537				-7.15637	0.473825	-3.51202	3.61866				18.1088	-12.9465	-7.02733	-5.60463				18.1088	-10.1466	-1.43058	-8.5527
	-7.58876	10.3562	12.3427	-2.10986				-7.58876	0.561773	-3.3626	3.48011				17.852	-12.2133	-6.4343	-5.48912				17.852	-9.55147	-1.41487	-7.95701
	-7.94462	9.30481	11.2521	-2.1565				-7.94462	0.375385	-3.66345	2.88158				16.5066	-11.4633	-5.82454	-5.37336				16.5066	-8.95563	-1.39401	-7.35085
	-5.1889	8.2381	10.1535	-2.14128				-5.1889	0.128961	-4.06121	2.1839				17.7273	-10.1212	-3.98658	-5.64564				17.7273	-8.58609	-1.25945	-7.06051
	-3.93094	7.18507	9.06234	-2.12625				-3.93094	-0.118727	-4.45946	1.49282				17.2782	-7.72145	-0.442281	-6.41863				17.2782	-8.47752	-0.979133	-7.14895
	-1.94015	4.24621	6.72783	-1.88688				-1.94015	-0.0854855	-4.66374	0.953639				12.0467	-4.9717	3.23574	-7.20278				12.0467	-8.37098	-0.693908	-7.23147
	-1.72977	-1.07897	2.91666	-1.37349				-1.72977	0.295822	-4.63876	0.565845				13.455	-2.29371	6.59486	-7.9282				13.455	-8.24477	-0.431743	-7.26454
	-5.25477	-6.25534	-0.656965	-0.881035				-5.25477	0.676169	-4.61234	0.177157				12.5923	-4.3483	4.64874	-7.8392				12.5923	-7.75852	-0.504922	-6.64764
	-2.54085	-10.7429	-3.61131	-0.43919				-2.54085	1.00058	-4.62255	-0.222333				12.7008	-6.33131	2.77354	-7.75027				12.7008	-7.2741	-0.574652	-6.02185
	-4.23575	-8.30185	-1.23709	-0.320427				-4.23575	0.596361	-5.20509	-0.886061				11.8751	-8.18879	1.01961	-7.6637				11.8751	-6.80396	-0.639281	-5.40389
	-3.91938	-5.79832	1.18519	-0.20163				-3.91938	0.188747	-5.78694	-1.54203				12.2865	-9.37939	-0.90972	-6.93341				12.2865	-6.785	-0.570053	-5.40095
	-4.59315	-3.29519	3.59404	-0.0858543				-4.59315	-0.211588	-6.35303	-2.17371				13.7072	-10.1392	-2.89154	-5.91122				13.7072	-6.98132	-0.439142	-5.6935
	-4.56885	-0.199601	5.68759	-0.160807				-4.56885	-0.148318	-6.45454	-2.35808				13.8451	-10.7391	-4.78882	-4.91991				13.8451	-7.17347	-0.311561	-5.97862
	-3.38608	3.1046	7.64978	-0.346903				-3.38608	0.134604	-6.3334	-2.32971				14.2185	-11.696	-6.70556	-4.17431				14.2185	-7.44564	-0.0932713	-6.41163
	-4.92016	6.31079	9.64089	-0.552593				-4.92016	0.408955	-6.21516	-2.30293				15.3638	-13.5851	-8.48147	-4.04468				15.3638	-7.89332	0.32482	-7.16688
	-3.75303	9.74416	12.3603	-0.577214				-3.75303	0.857593	-5.9922	-2.25883				13.626	-15.2181	-9.98735	-3.92145				13.626	-8.33831	0.732271	-7.905
	-3.90737	13.6316	16.5325	-0.124932				-3.90737	1.68511	-5.53513	-2.1785				14.5192	-16.6597	-11.2815	-3.79861				14.5192	-8.80228	1.14892	-8.66194
	-4.66911	17.553	20.7033	0.317503				-4.66911	2.48266	-5.08668	-2.10528				14.986	-16.7937	-11.4021	-3.79212				14.986	-8.8713	1.13485	-8.71755
	-6.88548	21.6919	25.0675	0.771645				-6.88548	3.28897	-4.62494	-2.03562				14.4436	-16.8334	-11.4396	-3.79462				14.4436	-8.90783	1.0878	-8.71754
	-5.21397	22.11	25.4952	0.802856				-5.21397	3.28624	-4.66237	-2.03072				14.8868	-16.8738	-11.4779	-3.79718				14.8868	-8.94531	1.03955	-8.71754
	-5.80338	22.2256	25.6047	0.800586				-5.80338	3.22149	-4.73757	-2.03072				13.5086	-15.2492	-9.96348	-3.7008				13.5086	-8.31713	1.17324	-8.10452
	-5.22227	22.3441	25.717	0.798262				-5.22227	3.15519	-4.81457	-2.03071				13.283	-11.708	-6.67838	-3.52749				13.283	-7.17114	1.45786	-7.00124
	-5.7768	18.0465	21.608	0.860861				-5.7768	3.04344	-5.00264	-2.5774				14.7577	-7.35152	-2.6428	-3.34985				14.7577	-5.99696	1.76072	-5.85261
	-5.69097	10.7061	14.5145	0.973788				-5.69097	2.90116	-5.27285	-3.53293				9.06063	-2.94452	1.36411	-3.0997				9.06063	-4.89431	1.96097	-4.76318
	-5.65727	3.723	7.6582	1.08929				-5.65727	2.75932	-5.54644	-4.4919				9.53793	-1.08194	2.63803	-2.51617				9.53793	-4.15488	1.63943	-4.04339
	-3.28117	-1.90156	2.03127	1.25469				-3.28117	2.55899	-5.67952	-5.16791				9.69041	0.85173	3.96975	-1.91742				9.69041	-3.40026	1.33049	-3.2892
	-3.97816	-3.26825	0.563226	1.64946				-3.97816	2.07072	-5.16326	-4.59893				9.52781	2.80944	5.32722	-1.31773				9.52781	-2.64859	1.04239	-2.5187
	-3.98786	-4.61687	-0.914614	2.0522				-3.98786	1.56434	-4.62906	-4.03843				9.02688	1.18643	1.78578	0.53644				9.02688	-1.74247	1.0623	-1.96736
	-3.17219	-5.91514	-2.36708	2.45333				-3.17219	1.05162	-4.08998	-3.50079				8.47339	-0.862611	-2.88346	2.77827				8.47339	-0.769755	1.20774	-1.3951
	-3.07216	-1.00588	1.25784	2.61331				-3.07216	1.16118	-2.4337	-2.34371				10.7515	-2.22687	-7.15825	5.01258				10.7515	0.200088	1.40426	-0.750981
	-2.89171	5.63495	6.67195	2.63505				-2.89171	1.44893	-0.423362	-1.01297				10.9753	-2.10576	-8.9855	6.506				10.9753	1.13938	1.70776	-0.12443
	-4.44164	12.1464	12.4909	2.56799				-4.44164	1.7447	1.59121	0.279912				6.85584	-0.65697	-7.8603	6.95282				6.85584	2.01266	2.091	0.385242
	-4.31427	15.1004	15.2312	2.59531				-4.31427	2.13532	3.15113	1.00452				4.98313	0.877689	-6.65637	7.40988				4.98313	2.90227	2.47628	0.906062
	-6.71213	13.3345	13.223	2.84849				-6.71213	2.64426	4.04407	0.969904				4.51178	2.51593	-5.30848	7.8563				4.51178	3.76709	2.85618	1.40495
	-6.60198	11.5886	11.21	3.10714				-6.60198	3.17489	4.9599	0.930233				4.98423	5.63979	-1.62794	8.03908				4.98423	4.14291	3.27173	1.40495
	-6.61771	9.78989	9.14796	3.40512				-6.61771	3.7255	5.87307	0.888115				3.81415	9.15649	2.29468	8.18977				3.81415	4.51957	3.6899	1.40494
	-7.98163	5.42929	5.09401	4.64588				-7.98163	4.52185	6.67993	0.888114				3.32642	12.9648	6.34671	8.30364				3.32642	4.88852	4.10124	1.40495
	-10.9604	1.19382	1.23193	5.91723				-10.9604	5.3399	7.50854	0.888111				4.03535	12.5776	5.93788	8.40959				4.03535	4.75437	4.29596	1.10683
	-10.9292	-2.82346	-2.37317	7.19049				-10.9292	6.16189	8.34096	0.888106				3.04201	9.98207	3.24965	8.52848				3.04201	4.35131	4.38769	0.641677
	-13.0919	-2.37462	-1.3643	7.73903				-13.0919	6.67882	8.92189	1.19202				5.43825	7.5323	0.727416	8.64665				5.43825	3.94735	4.47949	0.18037
	-10.8309	0.445755	2.11131	7.92964				-10.8309	7.05298	9.39421	1.67085				2.40226	5.5108	-1.12095	8.51225				2.40226	3.61492	4.49725	-0.147297
	-14.3192	3.35809	5.68467	8.12019				-14.3192	7.42286	9.866	2.15138				1.8708	4.11413	-1.70798	7.67223				1.8708	3.44889	4.31173	-0.147294
	-14.3206	5.63476	8.47956	8.12972				-14.3206	7.58563	10.1007	2.4963				7.17099	2.72323	-2.28976	6.83345				7.17099	3.28114	4.12464	-0.147308
	-12.1452	6.16947	9.15752	7.64123				-12.1452	7.20423	9.70699	2.4963				7.07287	1.3714	-2.85247	6.01592				7.07287	3.11574	3.9405	-0.147297
	-15.5772	6.72666	9.84305	7.15144				-15.5772	6.82363	9.31407	2.4963				7.0696	1.84146	-2.57237	6.11736				7.0696	3.01558	3.82917	-0.147302
	-15.7944	7.29226	10.5197	6.67187				-15.7944	6.45289	8.93133	2.4963				5.62324	2.56229	-2.16906	6.34198				5.62324	2.9243	3.72779	-0.147298
	-15.473	6.84574	9.75664	6.47516				-15.473	6.23056	8.70179	2.4963				4.43145	3.27123	-1.76529	6.55997				4.43145	2.83472	3.62842	-0.147297
	-16.9815	6.27068	8.80379	6.31588				-16.9815	6.02927	8.49396	2.4963				4.89351	2.423	-2.42338	6.29165				4.89351	2.62574	3.62503	-0.345436
	-15.4401	5.71859	7.87755	6.15862				-15.4401	5.83299	8.29131	2.49631				6.78903	0.0891782	-4.08055	5.54453				6.78903	2.30181	3.71877	-0.737018
	-14.9389	6.48297	8.58848	5.8225				-14.9389	5.88343	8.20055	2.50277				6.91706	-2.11212	-5.62417	4.81564				6.91706	1.9846	3.81123	-1.11922
	-14.0837	8.62215	10.965	5.31695				-14.0837	6.17767	8.22388	2.51353				4.58953	-3.7955	-6.72152	4.19874				4.58953	1.60063	3.89349	-1.55498
	-14.2151	10.8186	13.3475	4.82341				-14.2151	6.46279	8.24682	2.52142				7.30465	-2.0996	-5.02458	4.45061				7.30465	0.824442	3.8878	-2.28865
	-12.1609	12.5348	15.2279	4.47164				-12.1609	6.7365	8.21042	2.51456				6.38606	-0.345592	-3.31299	4.6886				6.38606	0.0663355	3.88615	-3.0027
	-13.5515	9.97936	12.9602	5.16121				-13.5515	6.89893	7.76827	2.41689				8.45519	1.54567	-1.50828	4.92424				8.45519	-0.710632	3.88848	-3.73176
	-13.8108	7.56298	10.8227	5.83701				-13.8108	7.05631	7.33697	2.31004				7.16677	0.0695427	-2.19769	4.27003				7.16677	-1.18803	4.10066	-4.35116
	-12.1356	5.16715	8.70831	6.53197				-12.1356	7.21639	6.89553	2.18878				6.79342	-2.43488	-3.61329	3.34307				6.79342	-1.56202	4.37456	-4.92238
	-12.8774	6.05739	10.1736	6.57591				-12.8774	7.75866	7.11413	2.254				6.01926	-4.92328	-4.95994	2.39718				6.01926	-1.9499	4.65308	-5.50699
	-14.0655	8.08573	12.8038	6.39601				-14.0655	8.40748	7.54451	2.37836				5.42524	-6.34686	-5.73627	2.01237				5.42524	-2.38039	4.8372	-6.05821
	-15.2252	10.282	15.5449	6.20031				-15.2252	9.06313	7.98619	2.50238				5.18664	-6.10414	-5.70625	2.54048				5.18664	-2.86643	4.86555	-6.54489
	-13.6139	11.9128	17.7742	6.48707				-13.6139	9.53863	8.28217	2.65075				5.85493	-5.85177	-5.67527	3.06427				5.85493	-3.36379	4.89452	-7.0428
	-16.432	12.4161	19.0602	7.58089				-16.432	9.72027	8.33213	2.84018				4.05438	-5.59519	-5.64382	3.57146				4.05438	-3.86163	4.92344	-7.54109
	-16.3772	12.9239	20.3774	8.70693				-16.3772	9.90431	8.38324	3.03312				6.49266	-5.92325	-5.27914	2.84559				6.49266	-5.05595	5.21387	-8.92724
	-16.477	13.4247	21.697	9.84087				-16.477	10.0867	8.43436	3.22538				7.29762	-6.24716	-4.89234	2.09832				7.29762	-6.29899	5.50681	-10.3463
	-18.5238	12.5054	20.8518	9.53277				-18.5238	11.0516	9.47268	4.18553				6.92021	-6.55517	-4.49532	1.35439				6.92021	-7.55246	5.79254	-11.7534
	-20.9164	11.538	19.9835	9.20794				-20.9164	12.0144	10.5457	5.19018				6.59442	-6.82565	-4.51386	1.13169				6.59442	-8.1132	5.95358	-12.4026
	-20.1016	10.5536	19.1223	8.87866				-20.1016	12.9433	11.6197	6.20999				7.0841	-7.08552	-4.79633	1.23019				7.0841	-8.25235	6.04465	-12.6014
	-19.7906	10.5685	19.2367	8.8317				-19.7906	13.4204	12.1904	6.68933				7.39596	-7.33924	-5.07148	1.3288				7.39596	-8.39252	6.13523	-12.8005
	-19.6689	11.2301	19.977	8.96478				-19.6689	13.6435	12.4642	6.83761				9.15835	-7.72742	-5.39307	1.38782				9.15835	-8.59747	6.27171	-13.0942
	-21.8605	11.895	20.7217	9.09822				-21.8605	13.866	12.7388	6.98658				9.1268	-8.63284	-5.90608	1.31182				9.1268	-9.05817	6.58253	-13.7544
	-22.6666	12.7359	21.7542	9.31843				-22.6666	14.203	13.1716	7.22378				8.43635	-9.49998	-6.35872	1.22864				8.43635	-9.52791	6.88424	-14.4103
	-22.4936	14.3096	23.9229	9.86892				-22.4936	14.9784	14.2131	7.80203				8.54124	-10.3083	-6.741	1.14052				8.54124	-9.99501	7.16983	-15.0464
	-24.6785	15.911	26.1044	10.4181				-24.6785	15.7397	15.2581	8.38667				8.12502	-10.804	-6.91934	0.874217				8.12502	-10.3563	6.85018	-15.1507
	-22.2739	17.5006	28.2447	10.953				-22.2739	16.469	16.2814	8.96374				8.17222	-11.2396	-7.06473	0.574586				8.17222	-10.7047	6.40243	-15.1507
	-22.5498	17.9781	28.6693	10.7478				-22.5498	15.8693	15.5213	9.05937				7.97103	-11.6741	-7.21129	0.274554				7.97103	-11.0644	5.94198	-15.1507
	-22.5023	18.2345	28.7553	10.3988				-22.5023	15.0167	14.4202	9.05935				7.5916	-12.0019	-7.16885	-0.0305914				7.5916	-11.2584	5.69446	-15.1507
	-22.7781	18.4933	28.8422	10.0503				-22.7781	14.1681	13.3254	9.05936				7.5263	-12.2276	-6.91924	-0.361094				7.5263	-11.2686	5.68141	-15.1507
	-25.4972	18.4681	28.9829	10.0516				-25.4972	13.7227	12.7514	9.05936				5.89364	-12.4514	-6.67789	-0.697404				5.89364	-11.2789	5.66835	-15.1507
	-26.0098	18.1208	29.1918	10.4378				-26.0098	13.6994	12.7214	9.05936				5.75287	-12.5456	-6.39307	-0.991971				5.75287	-11.3473	5.68489	-15.2274
	-25.646	17.7697	29.4037	10.8191				-25.646	13.6761	12.6914	9.05936				5.56369	-11.28	-5.47131	-0.88032				5.56369	-12.047	6.01158	-16.1259
	-25.3444	17.2351	29.4368	11.215				-25.3444	13.7222	12.7333	9.0958				5.29852	-9.92344	-4.51224	-0.776477				5.29852	-12.756	6.33151	-17.0246
	-26.7044	14.7084	27.6073	11.9229				-26.7044	14.4945	13.5391	9.52362				4.08198	-8.51597	-3.5424	-0.682701				4.08198	-13.4569	6.63721	-17.9022
	-27.4534	12.247	25.8213	12.632				-27.4534	15.2473	14.348	9.9527				4.00268	-7.75119	-2.73257	-1.02737				4.00268	-13.8434	6.64056	-18.2556
	-29.527	9.90771	24.119	13.3253				-29.527	15.9631	15.1407	10.373				7.94072	-7.2509	-2.00473	-1.55905				7.94072	-14.0902	6.5191	-18.3788
	-29.5682	7.96757	22.8932	13.7837				-29.5682	16.0675	15.3813	10.7778				7.86397	-6.71816	-1.28994	-2.08567				7.86397	-14.3319	6.40272	-18.4956
	-28.5576	6.20085	21.8889	14.1292				-28.5576	15.9168	15.384	11.1725				9.24131	-5.73002	-0.361186	-2.48376				9.24131	-14.8208	6.41028	-18.929
	-29.4569	4.475	20.925	14.458				-29.4569	15.7705	15.3872	11.5598				10.3551	-3.85303	1.03718	-2.58758				10.3551	-15.8004	6.66387	-19.9952
	-30.0959	2.36614	19.3688	14.6517				-30.0959	15.9031	15.7236	12.1172				10.7745	-1.91552	2.51528	-2.68928				10.7745	-16.7682	6.90559	-21.0321
	-30.459	-0.387646	16.6739	14.5735				-30.459	16.5854	16.7315	13.0072				10.5949	0.158357	4.13084	-2.79321				10.5949	-17.765	7.14557	-22.0834
	-30.271	-3.01555	14.0898	14.4968				-30.271	17.2301	17.722	13.8959				10.2906	-4.51093	0.873535	-2.89399				10.2906	-18.2741	7.00819	-22.416
	-30.3858	-5.63247	11.5071	14.4183				-30.3858	17.8641	18.7372	14.8221				14.3207	-8.90387	-2.1159	-2.99866				14.3207	-18.748	6.85927	-22.7025
	-30.5018	-0.149851	16.4155	13.7336				-30.5018	17.6911	18.6571	15.3418				14.3953	-12.8333	-4.70257	-3.11328				14.3953	-19.2361	6.70854	-22.9925
	-28.8889	5.98988	21.8256	13.0395				-28.8889	17.4893	18.5288	15.8325				13.0414	-15.1073	-6.02363	-3.52469				13.0414	-19.5909	6.6371	-23.2371
	-28.9379	12.782	27.6781	12.3268				-28.9379	17.2858	18.3975	16.341				14.949	-16.4647	-6.71236	-4.14829				14.949	-19.8417	6.62269	-23.4456
	-30.8867	16.6702	30.4614	11.1705				-30.8867	17.2071	18.3607	16.6708				13.8457	-17.8231	-7.45555	-4.80699				13.8457	-20.0992	6.6081	-23.6592
	-28.5836	18.1885	30.8735	9.73298				-28.5836	17.2171	18.3918	16.864				15.2348	-18.8352	-8.05313	-5.34057				15.2348	-20.3872	6.60203	-23.908
	-30.1502	19.7992	31.3256	8.26643				-30.1502	17.2275	18.4237	17.0632				15.227	-18.5737	-7.92562	-5.29584				15.227	-20.7852	6.62923	-24.2885
	-28.3013	21.0032	31.5837	7.08654				-28.3013	17.2574	18.4741	17.2731				15.7946	-18.2995	-7.78863	-5.25				15.7946	-21.1941	6.65708	-24.6788
	-28.3049	20.3705	30.954	7.04719				-28.3049	17.3622	18.5956	17.5156				13.6434	-18.0198	-7.64551	-5.20421				13.6434	-21.6031	6.68485	-25.069
	-29.3184	19.7251	30.3089	7.00672				-29.3184	17.4683	18.7204	17.7657				13.8255	-16.9855	-6.62557	-5.4108				13.8255	-21.8022	6.798	-25.321
	-30.0992	19.0836	29.6651	6.96618				-30.0992	17.5731	18.8452	18.0171				14.636	-15.5593	-5.2529	-5.68363				14.636	-21.9608	6.93209	-25.5487
	-30.1579	15.7839	27.0586	7.18134				-30.1579	17.8059	19.2346	18.2432				14.3689	-13.9324	-3.74951	-5.95957				14.3689	-22.1208	7.06408	-25.7759
	-30.6988	11.8657	24.0043	7.45836				-30.6988	18.0724	19.6964	18.4712				11.9055	2.58432	5.90773	-1.79395				11.9055	-19.9146	7.59742	-24.6269
	-30.4937	8.04907	21.0367	7.73243				-30.4937	18.3363	20.1589	18.7004				8.93785	5.35865	7.93192	-1.61165				8.93785	-19.5788	7.40022	-24.2529
	-27.9784	-7.14907	6.30024	11.4946				-27.9784	18.6883	18.0993	13.7298				8.65724	8.15213	9.95806	-1.4403				8.65724	-19.2565	7.20652	-23.8461
	-27.5526	-9.73451	4.19708	12.233				-27.5526	18.1169	16.5107	12.3959				8.49646	9.98628	11.2834	-1.34733				8.49646	-18.9081	7.172	-23.4865
	-27.7477	-12.1745	2.20545	12.957				-27.7477	17.5469	14.9615	11.1061				8.99784	9.13679	10.6742	-1.44278				8.99784	-18.5026	7.54295	-23.3509
	-28.2637	-13.7161	0.979552	13.45				-28.2637	17.2682	13.9925	10.0576				9.16547	8.31249	10.0851	-1.536				9.16547	-18.1113	7.90452	-23.2145
	-27.9304	-13.0719	1.62806	13.3267				-27.9304	17.7694	14.5373	9.64353				9.06717	7.47329	9.48753	-1.63151				9.06717	-17.7151	8.27431	-23.0706
	-25.5571	-12.4362	2.26599	13.2064				-25.5571	18.264	15.0732	9.24092				9.05452	7.22468	9.29199	-1.64003				9.05452	-17.6106	8.21434	-22.9222
	-25.5749	-11.778	2.92453	13.0832				-25.5749	18.776	15.6262	8.83017				8.6903	7.03406	9.13601	-1.64003				8.6903	-17.5358	8.11053	-22.7695
	-25.4593	-11.5508	3.15492	13.0722				-25.4593	18.5617	15.0814	8.41057				8.34644	6.84879	8.98456	-1.64003				8.34644	-17.4645	8.00772	-22.6164
	-26.5579	-11.3659	3.34339	13.0722				-26.5579	18.2743	14.4297	7.99178				6.8904	6.75989	8.91193	-1.64004				6.8904	-17.3177	7.87188	-22.3703
	-26.3117	-11.1855	3.52734	13.0722				-26.3117	17.9927	13.7957	7.58561				6.69123	6.75988	8.91193	-1.64004				6.69123	-17.1079	7.7085	-22.047
	-24.7455	-11.0986	3.61588	13.0722				-24.7455	17.6533	13.1132	7.16784				6.51114	6.75989	8.91193	-1.64004				6.51114	-16.9062	7.54619	-21.7287
	-25.3004	-11.0986	3.61588	13.0722				-25.3004	17.2686	12.4058	6.75249				5.05313	6.39811	8.66004	-1.69779				5.05313	-16.7202	7.39936	-21.4325
	-25.1432	-11.0986	3.61588	13.0722				-25.1432	16.8897	11.7179	6.35141				4.84877	4.04925	7.04352	-2.07614				4.84877	-16.6373	7.37863	-21.3214
	-23.0429	-10.8266	3.92714	13.0449				-23.0429	16.5393	11.0739	5.96312				6.46196	1.80762	5.53318	-2.44345				6.46196	-16.5569	7.35871	-21.2114
	-22.5857	-9.00688	5.99225	12.8649				-22.5857	16.4251	10.7664	5.68609				7.11806	-0.44635	4.04909	-2.81991				7.11806	-16.4747	7.3385	-21.0967
	-23.1121	-7.17503	8.04014	12.6883				-23.1121	16.3136	10.4676	5.41758				7.55096	-1.2923	3.45752	-2.90423				7.55096	-16.5228	7.28668	-21.1126
	-23.3617	-5.22686	10.1842	12.5054				-23.3617	16.1988	10.1612	5.14286				6.79564	-1.72646	3.12337	-2.90422				6.79564	-16.6065	7.22738	-21.165
	-23.5355	-4.37051	11.0773	12.4641				-23.5355	16.1323	10.0871	5.18414				6.71424	-2.1675	2.78524	-2.90422				6.71424	-16.6924	7.16689	-21.2182
	-23.6756	-3.85218	11.5909	12.4641				-23.6756	16.0811	10.0804	5.31361				7.99077	-2.4555	2.56517	-2.90422				7.99077	-16.744	7.13065	-21.2499
	-25.0935	-3.31801	12.1195	12.4641				-25.0935	16.029	10.0736	5.44643				7.78766	-2.51585	2.51913	-2.90422				7.78766	-16.744	7.13066	-21.2499
	-25.7049	-2.96488	12.4686	12.4641				-25.7049	15.9977	10.0695	5.52639				7.51673	-2.57759	2.47204	-2.90422				7.51673	-16.744	7.13067	-21.2499
	-24.7307	-2.89044	12.5421	12.4641				-24.7307	15.9977	10.0695	5.52639				7.99582	-2.66661	2.40341	-2.90098				7.99582	-16.7347	7.12693	-21.2386
	-25.1458	-2.81413	12.6175	12.4641				-25.1458	15.9977	10.0695	5.52639				8.55671	-4.04668	1.29662	-2.74536				8.55671	-16.278	6.94266	-20.6812
	-24.7194	-2.69993	12.716	12.4522				-24.7194	15.9903	10.062	5.52297				6.75292	-5.40586	0.171321	-2.5944				6.75292	-15.8126	6.75253	-20.1105
	-24.0838	-0.747007	13.9409	11.8655				-24.0838	15.6245	9.69453	5.3548				7.85933	-6.707	-0.943993	-2.45205				7.85933	-15.3497	6.56104	-19.5401
	-23.1196	1.2908	15.2274	11.2622				-23.1196	15.2432	9.31894	5.18231				9.79183	-5.88025	-0.193027	-2.60565				9.79183	-14.7795	6.24038	-18.7822
	-22.5002	3.36722	16.5476	10.6569				-22.5002	14.8552	8.94428	5.00956				11.888	-3.68654	1.81897	-2.93298				11.888	-14.1358	5.83141	-17.8922
	-21.4194	1.86905	14.6393	10.0686				-21.4194	14.2403	8.35083	4.81579				8.84363	-1.32513	4.03166	-3.2636				8.84363	-13.5009	5.41661	-17.0015
	-20.6523	-1.66467	10.8793	9.47259				-20.6523	13.4613	7.61502	4.60136				9.91571	-0.170727	5.38526	-3.71413				9.91571	-12.9894	5.06162	-16.2572
	-18.8462	-5.10833	7.20917	8.87696				-18.8462	12.6614	6.88165	4.38358				9.3565	-2.91192	3.78401	-4.56824				9.3565	-12.7785	4.86618	-15.8808
	-18.2367	-7.14709	4.84389	8.0829				-18.2367	11.9472	6.15124	4.09189				7.57356	-5.6076	2.16315	-5.43699				7.57356	-12.5711	4.66848	-15.498
	-15.1867	-5.3244	5.97161	6.62244				-15.1867	11.4742	5.35528	3.56251				10.66	-8.19036	0.56424	-6.2987				10.66	-12.3721	4.47339	-15.1184
	-16.6396	-3.40426	7.14933	5.17083				-16.6396	10.9967	4.56094	3.03812				10.9572	-7.62069	1.26331	-6.643				10.9572	-11.9987	4.21569	-14.5543
	-14.9018	-1.4307	8.35136	3.76192				-14.9018	10.5262	3.78706	2.53099				11.363	-6.52367	2.37137	-6.90673				11.363	-11.6035	3.94661	-13.9635
	-15.1663	-2.7471	6.6837	3.066				-15.1663	9.97528	3.18337	2.22162				10.3878	-5.41649	3.49944	-7.16691				10.3878	-11.2232	3.6817	-13.3878
	-12.7652	-4.56208	4.58753	2.48544				-12.7652	9.40685	2.6099	1.94546				10.9776	-5.13797	3.79329	-7.29483				10.9776	-10.9485	3.47774	-12.9531
	-14.3896	-6.30778	2.56637	1.92139				-14.3896	8.84571	2.05263	1.6778				11.0176	-5.79126	3.13433	-7.27404				11.0176	-10.7932	3.347	-12.6826
	-11.0415	-6.79574	1.75118	1.49715				-11.0415	8.40175	1.56878	1.4204				10.5191	-6.41739	2.49389	-7.25522				10.5191	-10.6434	3.21911	-12.4186
	-10.3486	-5.91606	2.25725	1.23472				-10.3486	8.10146	1.17653	1.18076				10.449	-7.02834	1.90547	-7.29058				10.449	-10.502	3.04365	-12.1246
	-9.19003	-5.05375	2.75638	0.979496				-9.19003	7.80783	0.795563	0.948991				11.2458	-7.45245	1.87631	-7.76123				11.2458	-10.4586	2.50779	-11.6495
	-10.5801	-4.28338	3.18613	0.691692				-10.5801	7.43458	0.322965	0.699049				12.2305	-7.86549	1.84628	-8.2209				12.2305	-10.4285	1.97488	-11.1839
	-6.98755	-4.50807	2.88432	0.192991				-6.98755	6.48325	-0.815871	0.342705				12.2901	-8.28757	1.81396	-8.69198				12.2901	-10.4104	1.41924	-10.705
	-8.33123	-4.72964	2.58991	-0.294039				-8.33123	5.54687	-1.92268	-0.00229699				14.2442	-7.87116	2.52625	-9.11197				14.2442	-10.3667	0.94553	-10.2172
	-4.91309	-4.95897	2.28857	-0.793239				-4.91309	4.57995	-3.05163	-0.352868				13.3472	-7.14054	3.50898	-9.50321				13.3472	-10.3207	0.509782	-9.72916
	-5.25336	-6.18731	1.15448	-1.16658				-5.25336	3.6811	-4.27733	-0.933446				14.2525	-6.36345	4.53987	-9.90342				14.2525	-10.2836	0.0581445	-9.21874
	-3.99386	-7.73521	-0.237689	-1.48693				-3.99386	2.82398	-5.50626	-1.57675				14.4774	-6.19984	5.09538	-10.4157				14.4774	-10.3048	-0.388931	-8.75476
	-2.2613	-9.31201	-1.64956	-1.8162				-2.2613	1.93936	-6.76144	-2.22833				15.6645	-7.16978	4.75776	-11.1158				15.6645	-10.4198	-0.812969	-8.39104
	-3.66682	-10.3214	-2.53511	-2.26068				-3.66682	1.07725	-8.01752	-2.87346				14.3435	-8.15827	4.41011	-11.8286				14.3435	-10.5455	-1.24854	-8.00846
	-2.37054	-10.3127	-2.48556	-2.90036				-2.37054	0.281467	-9.25087	-3.50028				16.9873	-9.14754	4.05853	-12.5414				16.9873	-10.6798	-1.68757	-7.61369
	1.2532	-10.3022	-2.43292	-3.5562				1.2532	-0.533508	-10.5059	-4.13423				15.7485	-7.2604	5.84036	-12.5729				15.7485	-11.1436	-2.23475	-7.51284
	-2.23651	-10.2903	-2.37804	-4.21676				-2.23651	-1.35312	-11.7602	-4.76367				14.3275	-5.29744	7.67119	-12.5878				14.3275	-11.6117	-2.77668	-7.41613
	1.66583	-12.5712	-4.27911	-4.10663				1.66583	-2.1566	-13.0097	-5.17691				14.5614	-3.23679	9.58599	-12.6034				14.5614	-12.0991	-3.33687	-7.31149
	1.47906	-14.7982	-6.1426	-3.98071				1.47906	-2.93756	-14.2263	-5.57447				15.4623	-3.86279	9.33153	-13.0159				15.4623	-12.2677	-3.71862	-7.05109
	2.26384	-17.028	-8.01385	-3.8517				2.26384	-3.73457	-15.4697	-5.9809				16.4944	-6.2365	7.65658	-13.6787				16.4944	-12.2229	-3.97371	-6.69524
	1.48275	-17.0026	-7.95593	-4.24628				1.48275	-4.36049	-16.341	-6.33252				15.7138	-8.63821	5.95891	-14.3559				15.7138	-12.1801	-4.23518	-6.32916
	4.01792	-15.4825	-6.62911	-4.97635				4.01792	-4.86397	-16.9508	-6.63926				17.1942	-10.338	4.8931	-15.0054				17.1942	-12.5344	-4.86011	-6.0933
	4.07222	-13.8716	-5.23987	-5.72482				4.07222	-5.381	-17.5736	-6.95061				17.5691	-9.68373	5.96016	-15.5515				17.5691	-14.2606	-6.73525	-6.31211
	7.36601	-12.9672	-4.41683	-6.38268				7.36601	-6.2524	-18.6118	-7.16718				17.1541	-8.98532	7.06825	-16.1075				17.1541	-16.0735	-8.68178	-6.53567
	4.32001	-14.6712	-5.63565	-6.7184				4.32001	-8.2922	-21.0465	-7.06395				17.3277	-8.25828	8.19307	-16.661				17.3277	-17.9321	-10.6545	-6.75912
	5.05541	-16.4077	-6.86875	-7.06652				5.05541	-10.3394	-23.5212	-6.95817				17.5494	-7.71192	8.72608	-16.7198				17.5494	-17.6739	-9.4961	-7.59807
	6.50866	-18.1386	-8.08943	-7.41972				6.50866	-12.3501	-25.9866	-6.85211				20.2045	-7.18436	9.16538	-16.6886				20.2045	-17.0687	-7.741	-8.57592
	6.93306	-18.8067	-8.68694	-7.4784				6.93306	-10.6549	-24.4469	-6.57456				21.0467	-6.65477	9.60727	-16.6575				21.0467	-16.529	-6.01107	-9.5542
	5.44641	-19.2946	-9.18592	-7.48361				5.44641	-8.25276	-22.1159	-6.25648				20.9229	-5.10197	11.0372	-16.6465				20.9229	-16.2622	-5.16221	-10.0381
	5.11773	-19.7795	-9.68334	-7.48884				5.11773	-5.87928	-19.7761	-5.93736				24.1652	-2.17864	13.7668	-16.6605				24.1652	-16.2464	-5.29681	-9.95536
	5.03702	-21.3844	-10.9435	-7.34112				5.03702	-4.70143	-18.5366	-5.71718				24.9668	0.814886	16.5412	-16.6765				24.9668	-16.2309	-5.4311	-9.87188
	3.35498	-24.3746	-13.1502	-7.00054				3.35498	-4.86506	-18.5582	-5.60458				25.8219	3.71879	19.2184	-16.6931				25.8219	-16.2426	-5.5189	-9.85921
	5.76482	-27.3034	-15.3045	-6.65872				5.76482	-5.02929	-18.5795	-5.49221				24.8223	5.88662	21.2145	-16.7024				24.8223	-16.6387	-5.00869	-10.8266
	5.44697	-30.0498	-17.2842	-6.31149				5.44697	-5.1086	-18.5325	-5.35557				26.5615	8.07582	23.1996	-16.7167				26.5615	-17.0475	-4.50186	-11.7895
	4.57873	-32.1146	-18.3237	-5.74932				4.57873	-4.04933	-17.5228	-4.81486				26.5249	10.2305	25.1261	-16.7354				26.5249	-17.4588	-4.01057	-12.7248
	4.94173	-34.1673	-19.3333	-5.18563				4.94173	-3.00417	-16.5117	-4.26542				27.3215	8.42305	23.3874	-16.6685				27.3215	-17.6117	-3.5408	-13.218
	4.93271	-36.1651	-20.2918	-4.63396				4.93271	-1.99781	-15.5231	-3.72018				23.0942	4.83019	20.056	-16.5686				23.0942	-17.6429	-3.08098	-13.4979
	0.240546	-34.645	-17.9269	-3.87236				0.240546	-1.29938	-15.0953	-3.77789				23.9002	1.3734	16.9147	-16.4797				23.9002	-17.6772	-2.62745	-13.7661
	-0.340529	-31.4944	-14.0709	-3.01898				-0.340529	-0.749738	-14.9301	-4.12127				24.9764	-1.50274	14.2038	-16.194				24.9764	-17.4248	-1.84058	-14.0285
	-0.752833	-28.3787	-10.2988	-2.18225				-0.752833	-0.21624	-14.7659	-4.46108				21.8754	-2.99219	12.3996	-15.4592				21.8754	-16.5585	-0.369859	-14.273
	-1.7139	-25.3403	-7.03487	-1.41043				-1.7139	0.703715	-13.9776	-4.66936				22.8814	-4.39355	10.6821	-14.7379				22.8814	-15.7561	1.03521	-14.5116
	-1.70658	-22.7475	-5.13581	-0.839541				-1.70658	2.45899	-11.8125	-4.55959				20.4521	-5.77009	8.97026	-13.9953				20.4521	-14.9797	2.44072	-14.7559
	-1.99276	-20.2035	-3.25331	-0.290383				-1.99276	4.17833	-9.67924	-4.45204				20.4388	-4.14037	9.79369	-13.4318				20.4388	-14.2838	2.06557	-14.02
	-3.10374	-17.5819	-1.29338	0.264008				-3.10374	5.94547	-7.47155	-4.34143				19.8292	-2.32628	10.7274	-12.9068				19.8292	-13.6124	1.58946	-13.2161
	-2.54366	-18.3709	-1.19471	1.62263				-2.54366	5.45134	-7.15719	-3.7902				19.9823	-0.465907	11.6277	-12.3854				19.9823	-12.9332	1.12028	-12.3809
	-4.32007	-19.3589	-1.21762	3.01612				-4.32007	4.79769	-6.97841	-3.24338				-0.509938	-5.66587	-4.13343	0.562442				-0.509938	4.16432	5.63348	-0.289076
	-4.36115	-20.3411	-1.22974	4.44544				-4.36115	4.12027	-6.78987	-2.71031				0.644195	-4.3871	-2.53107	0.0826511				0.644195	4.28957	5.09579	0.280849
	-10.9952	8.07463	12.9357	4.70494				-10.9952	9.17015	8.52298	-0.905752				0.693716	-3.02812	-0.855323	-0.384824				0.693716	4.39278	4.55754	0.836749
	-10.305	5.22883	9.92865	4.29722				-10.305	7.89402	7.25226	-1.27203				3.32448	-2.37784	0.0690201	-0.845356				3.32448	4.45618	4.0625	1.33468
	-9.35282	2.49447	7.0621	3.90004				-9.35282	6.64109	6.02123	-1.62791				3.62148	-3.38266	-0.789212	-1.28052				3.62148	4.46127	3.69977	1.69028
	-6.58396	0.924962	5.14023	3.25839				-6.58396	5.49196	4.84195	-2.00996				4.1517	-4.34992	-1.65229	-1.72085				4.1517	4.45797	3.34047	2.03906
	-5.0238	1.75485	5.14727	2.15519				-5.0238	4.62617	3.81846	-2.42595				1.9617	-5.33245	-2.56695	-2.19022				1.9617	4.44614	2.96503	2.40016
	-6.87831	2.57825	5.1705	1.08916				-6.87831	3.78136	2.82646	-2.82815				3.035	-3.81749	-0.136111	-2.41437				3.035	3.18568	3.31206	1.53239
	-5.29792	3.44066	5.21217	0.00177511				-5.29792	2.9112	1.81135	-3.23869				3.6384	-2.09999	2.28425	-2.68902				3.6384	1.90179	3.86521	0.82041
	-3.59207	0.399539	4.07853	1.56421				-3.59207	3.06421	-0.851676	-5.33222				2.46104	-0.209803	4.65573	-3.0394				2.46104	0.585964	4.61935	0.293786
	-4.29405	-2.68481	3.04113	3.19174				-4.29405	3.2565	-3.4768	-7.51767				3.14741	0.291366	5.39559	-3.33487				3.14741	0.880207	5.21214	0.945157
	1.97049	-5.79228	2.08914	4.84581				1.97049	3.4533	-6.10513	-9.8135				4.11492	-0.257026	5.01085	-3.56002				4.11492	2.29946	5.58717	2.30726
	-2.09153	-6.86215	1.48651	5.00017				-2.09153	3.51454	-7.09144	-11.151				3.74982	-0.816978	4.5943	-3.80334				3.74982	3.75311	5.97393	3.70559
	0.417336	-6.49662	1.09665	4.1067				0.417336	3.48325	-6.93435	-11.7573				5.72606	-1.74805	3.89944	-4.16235				5.72606	5.0268	6.14938	5.09417
	3.4309	-6.11828	0.701391	3.1948				3.4309	3.45639	-6.77083	-12.374				6.17025	-4.0681	2.22088	-4.92116				6.17025	5.56007	5.49005	6.40504
	3.81589	-5.4635	0.611818	2.22422				3.81589	3.09376	-6.96351	-12.9905				5.5376	-6.40209	0.490455	-5.71051				5.5376	6.07378	4.80029	7.75129
	6.42313	-3.72969	1.71258	1.04303				6.42313	1.41395	-8.52594	-13.6017				4.6547	-8.68885	-1.24874	-6.51169				4.6547	6.5544	4.09685	9.10058
	8.12196	-1.87354	2.89099	-0.159801				8.12196	-0.335685	-10.1175	-14.2247				6.73011	-11.2599	-3.45795	-7.49356				6.73011	7.39038	2.52471	10.9552
	7.49162	0.0677159	4.12399	-1.35569				7.49162	-2.11324	-11.7003	-14.8456				7.6491	-13.8781	-5.88585	-8.57577				7.6491	8.23389	0.725152	12.9454
	11.1384	2.53373	5.25131	-3.14589				11.1384	-5.0296	-13.2919	-15.0063				8.02131	-16.3964	-8.37974	-9.7009				8.02131	8.97488	-1.07772	14.9147
	12.313	5.29579	6.48343	-5.0917				12.313	-8.33999	-14.8938	-15.1224				7.64459	-17.136	-9.39432	-10.3698				7.64459	9.49678	-2.36422	16.3695
	17.0516	8.21738	7.84697	-7.02044				17.0516	-11.7353	-16.4653	-15.2972				9.75579	-15.6796	-8.43047	-10.4517				9.75579	9.85324	-3.05042	17.256
	19.4493	8.8966	7.35621	-8.39822				19.4493	-14.238	-17.5741	-15.4883				10.3949	-14.1609	-7.38397	-10.5449				10.3949	10.1928	-3.73498	18.1347
	18.7992	6.5984	4.32802	-9.15299				18.7992	-15.6518	-18.1697	-15.6584				8.65332	-12.7179	-6.34903	-10.6845				8.65332	10.2741	-4.41074	18.698
	22.1586	4.37199	1.34109	-9.90353				22.1586	-17.0751	-18.7602	-15.8404				10.4106	-13.2187	-6.5388	-11.5459				10.4106	5.81171	-5.15791	13.7014
	24.6765	2.33717	-1.4504	-10.6469				24.6765	-18.3057	-19.2569	-15.869				10.2651	-13.7161	-6.73494	-12.4128				10.2651	1.30866	-5.82337	8.75707
	24.931	1.88642	-2.33921	-11.6065				24.931	-16.2641	-18.248	-12.8291				10.8094	-14.1973	-6.93214	-13.2624				10.8094	-3.10779	-6.39133	4.01107
	25.3147	1.4281	-3.22444	-12.5641				25.3147	-14.3093	-17.2142	-9.79384				11.1172	-14.3964	-6.82048	-13.5878				11.1172	-5.21422	-7.13691	2.2774
	28.2879	0.974287	-4.08331	-13.4956				28.2879	-12.4582	-16.1872	-6.78884				13.0167	-14.4497	-6.55367	-13.6413				13.0167	-6.11514	-7.98847	2.07269
	29.547	0.646105	-4.3094	-13.6826				29.547	-12.4946	-16.3824	-5.51223				13.6209	-14.5008	-6.29577	-13.6943				13.6209	-7.0012	-8.81856	1.87638
	29.3879	0.388727	-4.2111	-13.4895				29.3879	-13.4695	-17.1953	-5.1604				12.9241	-15.0947	-6.61206	-13.9923				12.9241	-7.79981	-9.41879	1.54736
	28.9732	0.137274	-4.11409	-13.3013				28.9732	-14.4104	-17.9825	-4.81616				13.1519	-16.9825	-8.33573	-14.8829				13.1519	-8.31237	-9.40332	0.90668
	30.6188	0.439954	-3.71521	-13.4467				30.6188	-14.9811	-18.4198	-4.38028				13.5371	-18.7896	-10.018	-15.7562				13.5371	-8.81354	-9.38303	0.288431
	32.0825	2.14953	-2.56263	-14.4144				32.0825	-14.6106	-17.9665	-3.74312				14.4694	-20.6013	-11.7393	-16.6545				14.4694	-9.32777	-9.35693	-0.337374
	32.2099	3.88565	-1.39183	-15.3592				32.2099	-14.2499	-17.5236	-3.11516				16.1202	-21.3	-12.9185	-16.9059				16.1202	-9.32224	-9.03149	-0.649811
	32.7485	5.73632	-0.143266	-16.3278				32.7485	-13.8814	-17.0699	-2.46566				16.6538	-21.8758	-14.0491	-17.1005				16.6538	-9.2714	-8.67993	-0.933022
	32.0077	7.11198	0.542162	-16.8899				32.0077	-13.3085	-16.6593	-2.36544				16.591	-22.4191	-15.161	-17.2953				16.591	-9.22475	-8.33618	-1.21079
	32.9981	8.4514	1.19283	-17.4103				32.9981	-12.7192	-16.253	-2.31768				16.2211	-22.0403	-14.4416	-17.7085				16.2211	-9.2038	-8.17401	-1.34212
	33.968	9.77878	1.8532	-17.9178				33.968	-12.1433	-15.854	-2.27168				16.6245	-20.7142	-12.0288	-18.3002				16.6245	-9.20379	-8.17401	-1.34212
	34.1984	8.15614	0.26625	-18.29				34.1984	-11.8718	-15.6652	-2.25022				16.5221	-19.2322	-9.5641	-18.8744				16.5221	-9.20379	-8.17401	-1.34211
	34.7913	4.02654	-3.18258	-18.5428				34.7913	-11.8718	-15.6653	-2.25023				16.2691	-18.1426	-7.66363	-19.4182				16.2691	-9.27559	-8.23545	-1.35704
	34.1314	0.0831177	-6.43436	-18.7953				34.1314	-11.8718	-15.6653	-2.25022				16.7382	-20.1593	-9.53489	-19.7439				16.7382	-9.72898	-8.62358	-1.45088
	34.2622	-2.86154	-8.78679	-19.0476				34.2622	-11.9413	-15.7645	-2.26116				19.4302	-22.0612	-11.3105	-20.0608				19.4302	-10.1734	-9.00437	-1.54223
	36.8316	-0.411286	-6.44678	-19.2369				36.8316	-12.3779	-16.3897	-2.33031				17.844	-23.9346	-13.0727	-20.3845				17.844	-10.6304	-9.3963	-1.63554
	37.1046	2.0774	-4.10866	-19.4235				37.1046	-12.8019	-16.9995	-2.39816				19.2207	-23.8345	-13.3025	-20.0338				19.2207	-10.9075	-9.51398	-1.79313
	36.9225	4.73131	-1.6544	-19.6163				36.9225	-13.234	-17.6238	-2.46802				20.6784	-23.2103	-13.1192	-19.5048				20.6784	-11.1291	-9.55275	-1.96386
	38.7856	5.35666	-1.15553	-19.3658				38.7856	-13.295	-17.9715	-2.5984				20.0084	-22.5727	-12.9325	-18.9628				20.0084	-11.3552	-9.59107	-2.13691
	40.4278	5.39444	-1.21152	-19.0032				40.4278	-13.2536	-18.2361	-2.74361				20.3417	-21.9659	-12.3547	-18.9233				20.3417	-11.4231	-9.26113	-2.48931
	38.7734	5.4311	-1.26806	-18.6375				38.7734	-13.211	-18.5061	-2.8931				20.8762	-21.3724	-11.1947	-19.6104				20.8762	-11.2735	-8.41013	-3.09226
	40.8802	4.4585	-2.22258	-18.6611				40.8802	-12.6328	-18.3374	-3.01894				19.98	-20.699	-9.9635	-20.3109				19.98	-11.1385	-7.5404	-3.70768
	38.5435	2.06821	-4.42551	-19.2441				38.5435	-11.3035	-17.5374	-3.11111				19.9922	-19.9883	-8.7251	-20.99				19.9922	-11.0243	-6.70014	-4.29981
	36.7746	-0.357251	-6.64491	-19.8451				36.7746	-9.95403	-16.7144	-3.21274				20.8692	-20.1637	-8.61851	-21.0325				20.8692	-10.9847	-6.81087	-4.16209
	36.7853	-2.69262	-8.76147	-20.4298				36.7853	-8.65993	-15.9141	-3.31902				21.2141	-20.3428	-8.51037	-21.0762				21.2141	-10.9448	-6.92411	-4.02136
	38.5654	-2.75071	-8.52849	-20.3049				38.5654	-8.86012	-16.0314	-3.33561				21.6741	-20.5218	-8.40305	-21.1201				21.6741	-10.9052	-7.03742	-3.88066
	37.7761	-2.81046	-8.28986	-20.1771				37.7761	-9.06516	-16.1513	-3.35276				21.5664	-19.3935	-5.70343	-21.4345				21.5664	-10.4497	-7.54168	-2.79738
	38.3898	-2.87055	-8.05077	-20.0491				38.3898	-9.27056	-16.271	-3.3701				21.5366	-17.2438	-1.45412	-21.9211				21.5366	-9.76655	-8.28217	-1.10972
	38.015	-6.26644	-9.56565	-19.4929				38.015	-10.4722	-17.5298	-4.26804				21.4421	-14.8333	2.74931	-22.4156				21.4421	-9.11543	-9.01432	0.609151
	38.2545	-11.5663	-11.948	-18.6683				38.2545	-12.3098	-19.4791	-5.66795				24.394	-12.3949	5.88084	-22.1573				24.394	-8.63528	-9.54036	2.13168
	38.2134	-16.7178	-14.1251	-17.8398				38.2134	-14.1745	-21.4229	-7.03049				22.427	-10.1812	6.30903	-19.621				22.427	-8.53299	-9.45041	3.25565
	40.543	-19.9823	-15.3376	-16.6174				40.543	-15.7462	-23.4797	-8.56445				24.8041	-7.92691	6.70617	-17.0496				24.8041	-8.43605	-9.22089	4.535
	41.4454	-18.4399	-14.3043	-14.1835				41.4454	-16.5511	-26.0644	-10.804				21.1409	-5.69043	7.06345	-14.5109				21.1409	-8.34651	-8.86456	5.92709
	42.9848	-16.9641	-13.2613	-11.8298				42.9848	-17.3601	-28.6082	-12.9776				22.4743	-2.12211	10.0733	-13.9984				22.4743	-7.14209	-8.45588	7.17942
	45.9399	-15.5828	-12.2343	-9.59812				45.9399	-18.1537	-31.0412	-15.0293				20.6294	1.73478	13.5769	-13.7969				20.6294	-5.77163	-8.05209	8.39151
	47.489	-18.4757	-15.1722	-9.24874				47.489	-18.4197	-30.9853	-15.5812				18.3187	5.59026	17.0866	-13.5999				18.3187	-4.43312	-7.65826	9.57168
	33.3523	10.5738	3.1882	-17.5445				33.3523	-8.96408	-19.5319	-2.05471				17.0312	5.89668	17.3551	-13.6258				17.0312	-3.13709	-7.2373	10.7767
	32.7079	8.35587	2.24701	-16.8232				32.7079	-6.99364	-18.3866	-2.05459				18.9171	2.45487	14.1906	-13.8853				18.9171	-1.9183	-6.79616	11.9815
	28.607	6.20943	1.38512	-16.1153				28.607	-5.11178	-17.2619	-2.07546				18.2322	-0.840111	11.153	-14.1389				18.2322	-0.728484	-6.36303	13.1589
	23.961	5.54827	1.34233	-15.1997				23.961	-3.80975	-16.2246	-1.66627				18.3149	-3.75265	8.53025	-14.4122				18.3149	0.39506	-5.97516	14.2768
	19.8312	6.55262	2.19053	-14.0942				19.8312	-3.17481	-15.3229	-0.746305				18.0668	-3.65203	9.22586	-14.7886				18.0668	0.78646	-6.03457	14.7085
	18.8823	7.51142	3.0389	-13.0131				18.8823	-2.54665	-14.4218	0.189757				16.8892	-3.54481	9.89481	-15.1577				16.8892	1.16795	-6.09238	15.1288
	15.7692	8.42443	3.89149	-12.0203				15.7692	-1.88562	-13.4899	1.14379				17.0851	-3.42593	10.5696	-15.5373				17.0851	1.55813	-6.15142	15.5582
	11.3352	9.51843	4.99555	-11.3924				11.3352	-0.717067	-12.042	2.37958				16.5034	-3.68718	10.4038	-15.8637				16.5034	1.2106	-7.03618	15.1832
	9.62113	10.5944	6.10431	-10.7686				9.62113	0.429848	-10.5919	3.65212				14.658	-4.07611	9.93219	-16.1717				14.658	0.611202	-8.14386	14.5641
	8.6881	11.627	7.19114	-10.1633				8.6881	1.52805	-9.17428	4.93099				16.7021	-4.47304	9.4269	-16.4952				16.7021	-0.00563009	-9.22232	13.9634
	6.69835	8.24523	5.06086	-8.72455				6.69835	1.73036	-9.32135	5.35824				16.0963	-5.64039	8.13893	-16.9295				16.0963	-0.563094	-10.277	13.5719
	5.39869	3.39929	1.93387	-6.94901				5.39869	1.59364	-10.0889	5.42954				16.1148	-8.08675	5.51929	-17.5484				16.1148	-1.00922	-11.3256	13.513
	-0.231164	-1.05612	-0.851414	-5.19618				-0.231164	1.47614	-10.8367	5.49515				16.8349	-10.5353	2.79111	-18.2011				16.8349	-1.47398	-12.3564	13.4714
	-2.38106	-1.7546	-0.577317	-4.0504				-2.38106	1.94068	-10.5568	5.53718				15.1006	-12.925	0.0165203	-18.8737				15.1006	-1.94715	-13.3445	13.4489
	-4.0523	4.88344	5.58698	-4.19				-4.0523	3.52339	-8.24519	5.53718				13.8237	-14.4991	-1.4548	-19.3645				13.8237	-2.11169	-14.1817	13.9315
	-7.28411	11.8116	11.9935	-4.32665				-7.28411	5.09121	-5.96523	5.53718				12.0027	-16.0069	-2.86912	-19.8419				12.0027	-2.27754	-14.9863	14.4099
	-7.38839	19.3619	18.9773	-4.46699				-7.38839	6.72038	-3.6031	5.53718				10.8774	-17.5315	-4.31341	-20.3318				10.8774	-2.45678	-15.7993	14.9003
	-9.79309	20.0539	20.6634	-2.82672				-9.79309	5.65129	-5.0358	6.19715				12.0352	-18.9228	-5.47271	-20.6881				12.0352	-2.48895	-16.3818	15.4204
	-9.53274	20.4538	22.1177	-1.14661				-9.53274	4.55152	-6.55244	6.87363				11.2738	-20.1916	-6.41192	-20.95				11.2738	-2.42659	-16.8091	15.9444
	-10.9383	20.8433	23.6155	0.590801				-10.9383	3.46943	-8.08693	7.57531				10.1126	-21.4804	-7.3608	-21.2182				10.1126	-2.3662	-17.2488	16.4817
	-12.8581	14.4604	18.3256	1.84527				-12.8581	4.40688	-6.21691	8.31808				10.1801	-21.9868	-7.43002	-21.5778				10.1801	-2.26775	-17.6086	16.989
	-11.0374	4.34599	9.20431	2.73302				-11.0374	6.75273	-2.00938	9.06116				12.6567	-19.8585	-4.60868	-22.2278				12.6567	-2.03729	-17.7013	17.3938
	-12.6164	-4.99136	0.771275	3.64177				-12.6164	9.23049	2.36192	9.81076				12.239	-17.475	-1.58955	-22.8905				12.239	-1.80142	-17.796	17.8094
	-13.9201	-10.9036	-4.34292	4.73083				-13.9201	11.3787	6.139	10.3421				12.0033	-14.9142	1.53839	-23.5485				12.0033	-1.56627	-17.8904	18.225
	-14.9105	-7.11532	0.2237	6.47335				-14.9105	12.0558	7.4404	10.1014				12.1533	-12.2245	4.27533	-23.4664				12.1533	-1.66255	-17.3082	17.5061
	-14.5719	-3.22622	4.98727	8.27195				-14.5719	12.7813	8.78004	9.85429				10.233	-9.39281	7.04661	-23.2496				10.233	-1.83055	-16.5876	16.5572
	-17.5209	0.679068	9.86008	10.089				-17.5209	13.5398	10.129	9.60615				13.5902	-6.5054	9.85246	-23.0332				13.5902	-2.00946	-15.8673	15.6028
	-17.583	-0.0608687	10.2687	11.4224				-17.583	14.4669	11.4727	9.56469				12.6023	-8.86144	7.33121	-22.7504				12.6023	-2.21037	-15.062	14.5456
	-20.9026	-1.76261	9.78191	12.6957				-20.9026	15.4619	12.8693	9.5647				15.0033	-16.9709	-1.21138	-22.3729				15.0033	-2.45254	-14.1152	13.3112
	-20.2016	-3.43337	9.32249	13.9621				-20.2016	16.461	14.2735	9.56469				15.9074	-24.0474	-9.0722	-21.9932				15.9074	-2.71654	-13.1693	12.0687
	-19.8132	-2.96977	10.2426	14.525				-19.8132	17.3195	15.7377	9.8011				15.3613	-29.1133	-15.2693	-21.6896				15.3613	-2.96571	-12.3011	10.9407
	-22.7626	0.242015	13.004	14.2339				-22.7626	18.0571	17.3597	10.3406				16.8841	-27.8117	-13.8153	-22.277				16.8841	-2.8334	-12.1147	10.9795
	-22.3609	3.53471	15.8656	13.9359				-22.3609	18.8112	18.9914	10.8675				17.102	-26.3594	-12.2332	-22.8676				17.102	-2.70136	-11.9266	11.0192
	-24.8295	6.49797	18.493	13.7301				-24.8295	19.6005	20.6108	11.3395				15.8829	-24.8071	-10.5764	-23.4472				15.8829	-2.57273	-11.7416	11.0588
	-25.101	4.15144	16.902	15.1041				-25.101	21.16	22.7605	11.3395				16.0458	-25.3238	-10.6288	-24.0444				16.0458	-2.32568	-11.879	11.5406
	-26.5597	1.91323	15.3683	16.4875				-26.5597	22.7307	24.9306	11.3395				17.1792	-26.795	-11.4701	-24.6379				17.1792	-2.03103	-12.1612	12.2156
	-29.1915	-0.170437	13.9214	17.8467				-29.1915	24.2739	27.0678	11.3395				18.4784	-28.2228	-12.2798	-25.2133				18.4784	-1.74642	-12.4377	12.8753
	-29.4697	-1.02706	14.1464	19.5494				-29.4697	24.4852	27.5749	11.378				17.898	-29.0342	-12.5068	-25.5719				17.898	-1.46563	-12.7813	13.5857
	-30.9155	-1.29862	15.1651	21.4043				-30.9155	24.0247	27.2742	11.4225				18.9512	-28.4759	-11.4834	-25.4527				18.9512	-1.20509	-13.2533	14.3709
	-31.8569	-1.55674	16.1484	23.2216				-31.8569	23.5596	26.983	11.4521				17.984	-27.9127	-10.4837	-25.3375				17.984	-0.956334	-13.7167	15.1377
	-31.7362	-2.31733	16.5352	24.6969				-31.7362	23.7534	27.6745	11.8533				15.4862	-27.3211	-9.46556	-25.2214				15.4862	-0.708591	-14.1911	15.9188
	-34.4018	-4.27078	15.494	25.2318				-34.4018	25.5263	30.7087	13.1742				16.7693	-29.8729	-12.7597	-25.0066				16.7693	-0.549195	-14.9187	16.8011
	-35.8776	-6.18853	14.4881	25.7267				-35.8776	27.2037	33.6858	14.4876				16.4817	-32.1898	-16.0332	-24.7903				16.4817	-0.409613	-15.6414	17.6615
	-36.6431	-8.16381	13.4658	26.2059				-36.6431	28.8653	36.7479	15.8577				16.0344	-34.1418	-19.1645	-24.5668				16.0344	-0.27681	-16.3835	18.5407
	-27.1755	-9.81071	7.87869	26.2431				-27.1755	18.4728	21.5808	3.66855				14.8478	-34.8875	-20.4298	-24.5082				14.8478	-0.323037	-16.8786	18.9071
	-26.3109	-8.38662	8.85657	25.0914				-26.3109	18.0276	21.2611	3.54988				15.4313	-34.9658	-20.4036	-24.5759				15.4313	-0.49775	-17.172	18.8828
	-26.0292	-6.95051	9.82123	23.9684				-26.0292	17.5883	20.9498	3.43221				14.8631	-35.0461	-20.3767	-24.6453				14.8631	-0.677618	-17.4676	18.8595
	-25.8011	-5.43112	10.8229	22.8196				-25.8011	17.1336	20.6316	3.30976				14.653	-34.9398	-20.1265	-24.7278				14.653	-0.827716	-17.6855	18.8183
	-25.5943	-5.20128	10.7268	22.3547				-25.5943	16.6756	20.4881	3.28415				12.9741	-33.9592	-18.8674	-24.8651				12.9741	-0.843883	-17.5856	18.6947
	-25.5416	-5.41476	10.2664	22.1281				-25.5416	16.2234	20.4069	3.28541				11.2182	-32.8349	-17.4916	-25.0058				11.2182	-0.860632	-17.4832	18.568
	-23.8336	-5.63314	9.79447	21.8952				-23.8336	15.7523	20.3245	3.27931				11.5942	-31.5966	-16.0344	-25.1467				11.5942	-0.877563	-17.3808	18.4412
	-23.5494	-5.00926	10.0569	21.6092				-23.5494	15.404	20.226	3.27157				11.8433	-31.4755	-15.5782	-25.857				11.8433	-1.25262	-17.2761	17.8799
	-23.6083	-2.99421	11.5595	21.2349				-23.6083	15.2812	20.1024	3.27156				12.4616	-31.6182	-15.3524	-26.726				12.4616	-1.72858	-17.1676	17.1936
	-23.5311	-0.919004	13.1367	20.8373				-23.5311	15.1552	19.9756	3.27156				13.207	-31.735	-15.1129	-27.5919				13.207	-2.20631	-17.059	16.5061
	-23.3211	1.16326	14.751	20.426				-23.3211	15.0293	19.8489	3.27156				12.4974	-31.4875	-14.6011	-28.08				12.4974	-2.48804	-16.9537	16.0579
	-22.6734	-0.637861	12.5093	20.3288				-22.6734	15.317	20.1384	3.27156				12.5372	-30.7277	-13.684	-28.0717				12.5372	-2.51006	-16.847	15.9197
	-22.4889	-2.46674	10.2265	20.2327				-22.4889	15.6152	20.4386	3.27156				12.8119	-29.946	-12.7547	-28.0635				12.8119	-2.53233	-16.7403	15.7814
	-21.5205	-4.25073	7.98435	20.1362				-21.5205	15.9143	20.7398	3.27157				12.8901	-29.1677	-11.8269	-28.0696				12.8901	-2.53832	-16.6357	15.6678
	-21.2941	-5.16625	6.90812	20.2826				-21.2941	16.0302	20.8564	3.27156				13.6076	-28.8258	-11.1503	-28.3298				13.6076	-2.24795	-16.5702	16.001
	-21.2043	-5.54046	6.55853	20.5756				-21.2043	16.0302	20.8564	3.27157				13.0333	-28.4597	-10.4501	-28.5951				13.0333	-1.95061	-16.5012	16.3436
	-21.432	-5.91782	6.20273	20.8764				-21.432	16.0302	20.8564	3.27156				14.7461	-28.0777	-9.74281	-28.859				14.7461	-1.6534	-16.4304	16.6873
	-21.666	-6.03561	6.11158	21.1238				-21.666	15.9742	20.8427	3.30939				15.213	-27.3659	-8.78008	-28.8263				15.213	-1.50427	-16.6083	17.0695
	-22.6688	-5.33789	6.86468	21.1935				-22.6688	15.7406	20.7858	3.46693				15.2492	-26.4555	-7.65517	-28.6454				15.2492	-1.42534	-16.9176	17.4836
	-25.2385	-4.62158	7.64208	21.2646				-25.2385	15.5013	20.7279	3.62794				15.299	-25.5303	-6.52872	-28.4653				15.299	-1.34838	-17.227	17.8966
	-26.6942	-3.90366	8.42552	21.3355				-26.6942	15.262	20.6703	3.78856				14.8354	-24.6201	-5.53955	-28.3278				14.8354	-1.32865	-17.562	18.259
	-26.7718	-2.9473	9.2945	20.956				-26.7718	15.3923	20.8273	3.81148				14.4246	-23.7013	-4.81888	-28.286				14.4246	-1.45025	-17.9874	18.5233
	-24.884	-1.90474	10.2147	20.4888				-24.884	15.5898	21.0258	3.81147				14.0825	-22.7762	-4.09119	-28.2442				14.0825	-1.57358	-18.4101	18.7863
	-24.0545	-0.84212	11.1489	20.022				-24.0545	15.7875	21.2244	3.81149				12.6935	-21.8621	-3.37011	-28.2031				12.6935	-1.69628	-18.8225	19.0435
	-24.0922	-0.982436	11.1591	20.1134				-24.0922	15.9651	21.4336	3.85634				12.0877	-21.8621	-2.74976	-28.9361				12.0877	-1.691	-18.9618	19.1944
	-24.0227	-2.49359	10.1283	20.8368				-24.0227	16.1278	21.6642	3.95407				12.1973	-21.9458	-2.13804	-29.7455				12.1973	-1.67107	-19.0693	19.3326
	-23.9784	-3.98802	9.11666	21.556				-23.9784	16.2909	21.8953	4.05206				12.5133	-22.0053	-1.53724	-30.5228				12.5133	-1.65183	-19.1741	19.4671
	-24.0797	-5.37771	8.09324	22.1736				-24.0797	16.3752	22.0219	4.07952				12.2466	-21.6318	-1.10024	-30.5093				12.2466	-1.59737	-18.8993	19.2574
	-23.7085	-6.16915	6.46896	21.8934				-23.7085	15.6087	21.0297	3.33907				11.5834	-20.8679	-0.836598	-29.7449				11.5834	-1.51449	-18.2689	18.7239
	-23.3762	-6.92976	4.86021	21.6053				-23.3762	14.8296	20.0394	2.60388				12.5185	-20.1186	-0.581965	-28.9924				12.5185	-1.43868	-17.6523	18.2016
	-23.2595	-7.64235	3.30415	21.3163				-23.2595	14.057	19.0747	1.89113				12.1183	-19.4464	-0.378653	-28.2978				12.1183	-1.56409	-17.0529	17.4396
	-22.2847	-6.83482	3.64101	21.1368				-22.2847	14.2227	19.1752	1.67479				13.6666	-19.3919	-0.516556	-28.1223				13.6666	-2.90834	-16.6692	15.3126
	-22.1666	-5.39072	4.80884	21.0015				-22.1666	14.7987	19.7378	1.67479				14.1858	-19.3377	-0.651075	-27.9505				14.1858	-4.23746	-16.2897	13.2345
	-22.3294	-3.991	5.96597	20.8613				-22.3294	15.3614	20.2872	1.67479				15.4462	-19.2812	-0.788764	-27.7738				15.4462	-5.61613	-15.896	11.1054
	-23.4658	-2.61154	7.25859	20.4603				-23.4658	15.674	20.6035	1.56836				14.9131	-20.8978	-4.48521	-27.2127				14.9131	-7.29521	-15.1828	8.15883
	-19.4381	-1.27792	8.76148	19.5395				-19.4381	15.4269	20.3986	1.23842				16.0991	-22.6861	-9.19733	-26.5334				16.0991	-9.06197	-14.3458	5.09502
	-18.9761	0.103754	10.2584	18.6507				-18.9761	15.1834	20.1995	0.917281				19.233	-24.1336	-14.0416	-25.819				19.233	-10.9195	-13.4385	2.03387
	-18.945	1.60923	11.8331	17.7446				-18.945	14.9302	19.9952	0.587245				20.2402	-24.7367	-16.9008	-25.1681				20.2402	-11.6756	-12.4581	0.207654
	-21.4116	-0.949794	9.22308	18.5961				-21.4116	14.5934	19.6753	0.433974				19.832	-24.5464	-16.6255	-24.6558				19.832	-10.6588	-11.4373	0.23761
	-21.9114	-3.52078	6.54585	19.5298				-21.9114	14.259	19.357	0.294161				19.7968	-24.3506	-16.3462	-24.1326				19.7968	-9.6322	-10.3768	0.284177
	-21.954	-5.99591	3.90601	20.492				-21.954	13.9151	19.0313	0.150938				21.8805	-24.1646	-16.0838	-23.6119				21.8805	-8.64391	-9.31726	0.337952
	-22.0389	-5.887	3.70561	20.1777				-22.0389	13.8542	19.0073	0.223753				25.3993	-25.2418	-17.5078	-23.2181				25.3993	-10.4141	-10.1965	-0.679447
	-21.2673	-3.88817	5.30099	18.9278				-21.2673	14.0036	19.2063	0.454604				26.2422	-26.2572	-18.9037	-22.815				26.2422	-12.2285	-11.1057	-1.72401
	-21.6594	-1.74906	6.99667	17.6506				-21.6594	14.1557	19.4102	0.691531				28.5365	-27.1786	-20.2308	-22.4121				28.5365	-14.0434	-12.023	-2.77088
	-21.2853	-0.085026	8.39414	16.8341				-21.2853	14.308	19.5947	0.892482				35.1081	-23.1829	-15.3063	-17.3577				35.1081	-17.8132	-9.12458	-9.29638
	-21.9754	-0.775251	8.26936	17.9377				-21.9754	14.4605	19.6937	0.937555				36.2722	-22.7021	-13.542	-17.3469				36.2722	-18.1217	-7.92411	-10.6398
	-21.595	-1.46222	8.14817	19.0744				-21.595	14.6163	19.7953	0.983551				35.6649	-22.178	-11.8382	-17.3462				35.6649	-18.4628	-6.75629	-11.9492
	-21.9821	-2.12885	8.03226	20.2172				-21.9821	14.7717	19.8968	1.02937				38.8351	-21.3078	-10.9304	-16.6417				38.8351	-18.9018	-6.05034	-13.0486
	-19.525	-2.46182	7.54387	19.2421				-19.525	14.2575	19.3928	1.0379				36.8992	-20.1015	-10.9393	-15.1367				36.8992	-19.4077	-5.88291	-13.8633
	-19.9325	-2.72408	6.95235	17.7586				-19.9325	13.5748	18.7352	1.0379				36.004	-18.8815	-10.9461	-13.6238				36.004	-19.9167	-5.70813	-14.6559
	-16.633	-2.98349	6.35745	16.2879				-16.633	12.8931	18.0785	1.0379				36.2416	-17.7666	-10.983	-12.2079				36.2416	-20.4352	-5.50086	-15.457
	-17.4175	-3.05836	6.07117	15.2748				-17.4175	12.1526	17.3858	1.08134				33.4065	-17.4236	-11.3118	-11.374				33.4065	-21.1524	-5.00719	-16.7083
	-17.5428	-2.88564	6.19194	14.8154				-17.5428	11.2946	16.6083	1.1862				33.0709	-17.0645	-11.6294	-10.5383				33.0709	-21.8855	-4.50986	-17.9279
	-17.3875	-2.7077	6.31396	14.3572				-17.3875	10.4422	15.8343	1.29116				32.7251	-16.6987	-11.9283	-9.72098				32.7251	-22.6165	-4.02137	-19.0862
	-16.3377	-2.52723	6.41489	13.8985				-16.3377	9.62389	15.0885	1.38977				32.9858	-14.4848	-9.23448	-8.88205				32.9858	-23.5463	-4.18994	-19.9085
	-14.9919	-2.30586	6.043	13.1481				-14.9919	9.03513	14.5185	1.38977				34.0599	-11.2812	-5.33994	-8.0831				34.0599	-24.5418	-4.62215	-20.598
	-15.0222	-2.08249	5.67081	12.3972				-15.0222	8.44715	13.949	1.38977				31.6501	-7.87558	-1.51979	-7.34937				31.6501	-25.5123	-5.04751	-21.2714
	-15.2863	-1.85755	5.29934	11.6476				-15.2863	7.86114	13.3812	1.38977				30.6718	-7.04485	-0.612216	-6.85072				30.6718	-25.7538	-4.78544	-21.726
	-15.1827	-3.96541	3.04246	11.9064				-15.1827	7.45361	13.1207	1.38644				28.8713	-11.3804	-5.2093	-6.76364				28.8713	-24.5728	-3.19702	-21.726
	-15.2955	-7.13013	-0.0880157	12.6629				-15.2955	7.11546	12.9985	1.38023				29.1945	-15.0104	-9.21492	-6.67926				29.1945	-23.4621	-1.68609	-21.726
	-14.6271	-10.131	-3.08695	13.4226				-14.6271	6.77576	12.8765	1.37262				28.3873	-18.0124	-12.7391	-6.59346				28.3873	-22.3691	-0.181949	-21.726
	-14.3589	-11.23	-4.31651	13.6902				-14.3589	6.40138	12.7031	1.29867				26.2835	-17.1801	-12.3166	-5.35929				26.2835	-23.6388	-1.35916	-22.1618
	-13.3063	-7.94985	-1.43736	12.753				-13.3063	5.90676	12.3854	1.05527				25.0725	-16.2407	-11.7877	-4.13677				25.0725	-24.9842	-2.61751	-22.5929
	-12.0229	-4.52313	1.59262	11.8121				-12.0229	5.40675	12.0677	0.809919				23.1078	-15.2755	-11.261	-2.91054				23.1078	-26.3832	-3.91912	-23.0238
	-11.5142	-1.04492	4.69127	10.8958				-11.5142	4.91639	11.7593	0.569952				24.1171	-12.2604	-8.22381	-2.35805				24.1171	-25.7872	-3.02708	-23.0665
	-11.1149	-1.32	4.09029	11.033				-11.1149	4.59635	11.6722	0.419149				20.851	-6.64287	-2.55231	-2.28017				20.851	-23.9003	-0.743153	-22.8315
	-10.0081	-1.993	3.08223	11.2842				-10.0081	4.29398	11.6099	0.276702				17.987	0.44436	4.27016	-2.21713				17.987	-22.0767	1.44485	-22.5718
	-10.2006	-2.62422	2.108	11.5273				-10.2006	3.99644	11.5491	0.135569				17.0955	6.30138	9.56327	-1.91823				17.0955	-20.4542	3.19184	-22.1955
	-11.6068	-2.57248	1.98858	11.2334				-11.6068	3.91884	11.6228	0.0351846				16.0865	4.18373	6.64415	-0.717855				16.0865	-19.2229	3.83008	-21.4613
	-11.2931	-1.87633	2.67176	10.4512				-11.2931	4.04987	11.82	-0.0238151				16.3049	2.21926	3.89259	0.484771				16.3049	-17.9726	4.46517	-20.7112
	-11.3286	-1.16241	3.35244	9.69194				-11.3286	4.17839	12.0127	-0.0816524				16.3364	0.470704	1.4062	1.66127				16.3364	-16.7317	5.08223	-19.9617
	-11.5475	-0.703997	3.8241	9.16512				-11.5475	4.28491	12.195	-0.125124				16.0382	1.21473	1.9746	1.79469				16.0382	-16.1477	5.69261	-19.8369
	-12.5231	-1.99568	2.92328	10.0769				-12.5231	4.2419	12.2892	-0.0756697				17.9464	2.51151	3.11202	1.68822				17.9464	-15.6937	6.30661	-19.8369
	-12.9137	-3.21616	2.071	10.9723				-12.9137	4.19984	12.3811	-0.0277054				12.7935	3.84717	4.19379	1.54675				12.7935	-15.2575	6.89911	-19.8369
	-11.6027	-4.42563	1.22418	11.895				-11.6027	4.15667	12.4753	0.0211104				11.8275	3.59913	3.84956	1.63925				11.8275	-14.7088	7.36805	-19.6443
	-11.0563	-4.46223	0.740911	11.525				-11.0563	4.70221	12.076	0.65967				11.7298	1.40377	1.81155	2.06353				11.7298	-13.9751	7.71726	-19.1878
	-11.2296	-4.16179	0.370876	10.7835				-11.2296	5.38073	11.5411	1.40158				10.3739	-0.63841	-0.118682	2.48395				10.3739	-13.2493	8.04988	-18.7174
	-9.17231	-3.85456	-0.00525838	10.0263				-9.17231	6.04457	10.9955	2.0969				8.15996	-2.24443	-1.71026	2.89412				8.15996	-12.5614	8.37844	-18.2742
	-8.61877	-3.26083	0.284722	9.62735				-8.61877	6.20484	10.5368	2.48046				7.35753	0.0783681	-0.299145	3.40706				7.35753	-12.0276	9.07393	-18.2742
	-8.639	-2.24052	1.583	9.78168				-8.639	5.62771	10.2217	2.45433				10.1366	2.48294	1.10997	3.89682				10.1366	-11.535	9.71781	-18.2742
	-7.3037	-1.18512	2.92328	9.9396				-7.3037	5.03426	9.90059	2.42513				4.7804	4.90224	2.48081	4.35213				4.7804	-11.0945	10.2952	-18.2742
	-9.17238	-0.107102	4.26489	10.0788				-9.17238	4.44554	9.5859	2.39105				3.58644	6.27367	2.98755	4.69959				3.58644	-10.4184	10.3271	-17.6684
	-8.95639	1.55427	4.85968	9.06225				-8.95639	4.36368	9.59684	2.21193				4.02684	7.09556	3.011	4.95346				4.02684	-9.62471	10.1107	-16.7715
	-9.27972	3.25281	5.50838	8.00267				-9.27972	4.27943	9.60805	2.02807				6.23691	7.89912	2.96929	5.15005				6.23691	-8.85343	9.90221	-15.8944
	-9.05095	4.94735	6.20042	6.92559				-9.05095	4.19476	9.61927	1.84379				3.72583	8.71545	3.15029	4.97875				3.72583	-8.4679	9.89791	-15.5175
	-7.91108	5.77023	6.90492	7.04114				-7.91108	4.35162	9.88792	1.80812				5.81608	9.55237	3.98509	4.02178				5.81608	-9.06301	10.3267	-16.354
	-8.83966	6.10965	7.63015	7.87822				-8.83966	4.65923	10.3209	1.85843				5.42752	10.4267	4.79096	3.07008				5.42752	-9.69215	10.6618	-17.1395
	-9.22344	6.43946	8.35487	8.7212				-9.22344	4.96762	10.7536	1.90826				3.79723	11.3797	5.60736	2.07801				3.79723	-10.3836	10.9175	-17.9112
	-8.37233	6.21808	8.32734	9.41422				-8.37233	5.3088	11.2366	2.03768				-4.9376	18.4619	9.14528	6.03429				-4.9376	5.87936	8.80875	-1.5301
	-9.36651	4.32298	5.97965	9.69299				-9.36651	5.78527	11.9284	2.43188				-6.93563	16.4117	8.14022	5.97436				-6.93563	6.23896	8.66814	-1.09443
	-13.0374	2.50708	3.69032	9.97254				-13.0374	6.26065	12.6211	2.8274				-7.44863	14.4417	7.14422	5.89566				-7.44863	6.58751	8.53002	-0.669548
	-11.1179	0.810287	1.5097	10.2462				-11.1179	6.72363	13.2983	3.21472				-7.12459	12.4581	6.10849	5.79443				-7.12459	6.94196	8.38765	-0.23475
	-10.808	0.626084	1.89515	10.4044				-10.808	6.66517	13.4824	3.48853				-7.55161	12.1423	6.02184	5.79922				-7.55161	7.43818	8.23377	0.337467
	-11.2546	0.69919	2.70649	10.5295				-11.2546	6.51962	13.5827	3.74188				-7.5775	12.3807	6.25692	5.84236				-7.5775	7.96684	8.08273	0.940999
	-14.2265	0.780303	3.49998	10.6382				-14.2265	6.37769	13.6807	3.98901				-7.40985	12.6262	6.49996	5.88547				-7.40985	8.50672	7.93067	1.56092
	-14.5992	0.734821	3.82214	10.5833				-14.5992	6.09116	13.5749	4.29229				-4.83753	12.2781	6.16648	6.15308				-4.83753	8.83237	7.81991	1.95346
	-10.9712	0.540983	3.61182	10.3596				-10.9712	5.65524	13.2468	4.65091				-4.75063	10.9928	4.89312	6.78334				-4.75063	8.79377	7.77738	1.95346
	-9.94029	0.347496	3.40368	10.1383				-9.94029	5.22832	12.923	5.00712				-4.95745	9.74244	3.61058	7.42129				-4.95745	8.75397	7.73353	1.95345
	-10.1804	0.240726	3.30163	9.92814				-10.1804	4.78482	12.6237	5.35011				-5.49013	8.56398	2.35466	8.04984				-5.49013	8.71398	7.68951	1.95346
	-9.65079	0.897697	4.11478	9.80275				-9.65079	4.13681	12.514	5.58254				-5.23144	10.2785	3.68075	8.10373				-5.23144	8.80504	7.78979	1.95345
	-9.8715	1.56674	4.93519	9.67734				-9.8715	3.48561	12.4043	5.80845				-5.3778	12.1145	5.14079	8.15263				-5.3778	8.89828	7.89264	1.95347
	-9.10815	2.23158	5.74317	9.5549				-9.10815	2.84693	12.2971	6.02267				-5.13149	14.0088	6.68176	8.20133				-5.13149	8.99061	7.99468	1.95347
	-9.01247	2.87224	5.95441	8.9466				-9.01247	2.61552	12.1775	6.0072				-4.65384	15.1685	7.52793	8.31771				-4.65384	9.02606	8.03389	1.95346
	-9.35847	3.49782	5.93854	8.15575				-9.35847	2.54422	12.0542	5.90475				-3.77017	15.8275	7.89423	8.4725				-3.77017	9.02606	8.0339	1.95346
	-9.60016	4.11316	5.93143	7.38189				-9.60016	2.47441	11.9337	5.80462				-3.08574	16.5049	8.26994	8.63023				-3.08574	9.02605	8.03389	1.95346
	-9.94415	3.66857	5.03097	7.02317				-9.94415	2.50366	11.9283	5.73825				-4.35677	16.8935	8.41686	8.79076				-4.35677	9.01965	8.01139	1.96692
	-10.3686	1.28012	2.50901	7.46671				-10.3686	2.72026	12.1418	5.73824				-5.93979	16.349	7.83368	8.9589				-5.93979	8.99253	7.91828	2.02363
	-9.162	-0.973437	0.120481	7.90175				-9.162	2.93242	12.3509	5.73825				-6.92475	15.7997	7.24525	9.13121				-6.92475	8.96406	7.8241	2.0827
	-9.51585	-3.19487	-2.24575	8.34766				-9.51585	3.1496	12.5649	5.73825				-6.03504	15.2592	6.66606	9.30363				-6.03504	8.93492	7.73116	2.14278
	-10.9554	-1.07078	-0.340988	8.18307				-10.9554	2.90548	12.3243	5.73824				-5.97306	14.1823	5.8856	9.2936				-5.97306	8.98236	7.7738	2.15144
	-11.678	1.12267	1.69314	7.99521				-11.678	2.65469	12.0772	5.73824				-5.00029	12.9987	5.05417	9.24845				-5.00029	9.04393	7.84039	2.15144
	-11.0249	3.36906	3.83894	7.79218				-11.0249	2.39818	11.8243	5.73823				-4.73836	11.8341	4.23045	9.19942				-4.73836	9.10503	7.90654	2.15144
	-11.5729	3.42559	4.26719	7.78329				-11.5729	3.41648	11.7452	6.27525				-4.88401	11.8108	4.2877	9.06918				-4.88401	9.13888	7.96138	2.1379
	-10.8783	1.98557	3.53079	7.8807				-10.8783	5.1779	11.7822	7.05714				-4.695	13.09	5.33636	8.83423				-4.695	9.14357	8.00602	2.10856
	-10.4183	0.451159	2.79323	7.9456				-10.4183	6.89181	11.8198	7.73633				-4.51212	14.4103	6.38462	8.58494				-4.51212	9.14795	8.0504	2.0794
	-10.9687	-1.03858	2.1814	8.00593				-10.9687	8.1092	11.7968	8.1721				-4.62811	15.7497	7.40485	8.39004				-4.62811	9.19845	8.07609	2.10577
	-10.6886	-2.16855	1.97917	8.14051				-10.6886	7.83739	11.5611	8.12824				-5.67587	17.2771	8.43994	8.88431				-5.67587	9.77024	7.90345	2.75241
	-10.3491	-3.36117	1.77903	8.24956				-10.3491	7.55773	11.3195	8.08304				-6.36494	18.8145	9.50793	9.37361				-6.36494	10.3347	7.72562	3.40513
	-8.53084	-4.58601	1.58608	8.32935				-8.53084	7.27739	11.0782	8.03766				-6.50755	20.3241	10.581	9.84637				-6.50755	10.8786	7.54709	4.04802
	-7.86414	-7.15259	-1.1781	8.30958				-7.86414	6.57384	10.2305	7.71951				-7.00323	20.1398	10.109	10.4087				-7.00323	11.1727	7.63301	4.24514
	-8.24114	-9.94461	-4.44609	8.27216				-8.24114	5.76358	9.24182	7.33984				-6.68312	19.2505	8.97634	11.0033				-6.68312	11.3541	7.83124	4.24514
	-8.98663	-12.6241	-7.63027	8.23387				-8.98663	4.95029	8.25665	6.96181				-8.79935	18.4193	7.88894	11.58				-8.79935	11.5271	8.02104	4.24514
	-6.81065	-13.5738	-8.9777	8.09662				-6.81065	4.56613	7.8389	6.85463				-9.22113	17.0661	6.68929	11.7504				-9.22113	11.809	8.13929	4.40439
	-6.2208	-12.5306	-8.19045	7.82984				-6.2208	4.69428	8.09664	7.0752				-6.71201	14.6185	5.29723	11.0387				-6.71201	12.3158	8.10321	4.89772
	-6.10227	-11.4798	-7.39163	7.56232				-6.10227	4.8222	8.35441	7.29608				-6.71921	12.2716	3.96676	10.3417				-6.71921	12.8078	8.0679	5.37731
	-4.89496	-10.4469	-6.59021	7.3335				-4.89496	4.92925	8.58402	7.49647				-6.53084	9.90027	2.62646	9.62113				-6.53084	13.312	8.03141	5.86949
	-6.86684	-9.39558	-5.60137	7.61935				-6.86684	4.76091	8.47117	7.45653				-9.4376	12.8067	4.72449	9.95864				-9.4376	13.4529	7.94175	6.0746
	-8.9612	-8.35018	-4.60598	7.90422				-8.9612	4.59215	8.35842	7.41642				-9.12834	16.0554	7.05513	10.3358				-9.12834	13.5691	7.85027	6.25899
	-7.25292	-7.33337	-3.62574	8.18196				-7.25292	4.42667	8.24821	7.377				-9.12633	19.4966	9.5315	10.7106				-9.12633	13.6869	7.7555	6.44795
	-5.93129	-7.08945	-3.64606	8.29674				-5.93129	4.35804	8.09459	7.23419				-9.2234	19.4647	9.52637	10.8043				-9.2234	13.6058	7.72496	6.39791
	-6.04733	-7.20632	-4.14031	8.33158				-6.04733	4.33578	7.92153	7.04355				-9.19025	16.8696	7.64404	10.6718				-9.19025	13.3805	7.74321	6.17305
	-5.77534	-7.31544	-4.62281	8.36294				-5.77534	4.31402	7.75221	6.85704				-8.57059	14.2877	5.71555	10.5063				-8.57059	13.1494	7.762	5.94321
	-6.46483	-7.47341	-5.07499	8.37364				-6.46483	4.34074	7.67795	6.72496				-9.1554	12.4776	4.28069	10.414				-9.1554	12.9435	7.78575	5.73354
	-6.77888	-7.74473	-5.43519	8.34162				-6.77888	4.47762	7.82614	6.72496				-8.27904	13.6015	4.90093	10.7285				-8.27904	12.8482	7.82909	5.61048
	-6.44974	-8.00952	-5.78737	8.31023				-6.44974	4.61189	7.97151	6.72496				-9.01722	14.7615	5.50841	11.0306				-9.01722	12.7503	7.8734	5.48437
	-7.38613	-8.27906	-6.14661	8.27813				-7.38613	4.74925	8.12023	6.72496				-7.65204	15.9296	6.08759	11.3122				-7.65204	12.6521	7.91761	5.35822
	-7.5259	-6.29147	-3.89464	8.12076				-7.5259	4.60064	8.02873	6.69013				-6.96797	15.0209	6.15407	10.4284				-6.96797	12.4654	7.74288	5.33468
	-8.76012	-4.11696	-1.44762	7.95827				-8.76012	4.43403	7.92166	6.65341				-9.98317	13.6005	6.08569	9.23904				-9.98317	12.2484	7.508	5.33468
	-6.3872	-1.80321	1.13539	7.79137				-6.3872	4.26225	7.81163	6.61545				-8.26548	12.1784	5.99482	8.03491				-8.26548	12.0256	7.26795	5.33468
	-6.56576	-0.391005	2.12234	7.24764				-6.56576	3.96695	7.52781	6.21577				-9.04522	11.0784	5.82521	7.18584				-9.04522	11.7424	6.9956	5.30759
	-6.2105	0.23877	1.78135	6.39429				-6.2105	3.56904	7.10421	5.52882				-6.44995	10.357	5.56177	6.78637				-6.44995	11.3617	6.66554	5.24242
	-6.24135	0.853299	1.45403	5.54885				-6.24135	3.17354	6.68822	4.859				-5.79652	9.63618	5.29602	6.38592				-5.79652	10.9727	6.32919	5.17743
	-6.97758	1.06196	0.875705	4.87252				-6.97758	2.91605	6.41054	4.27791				-5.25169	8.94707	5.03784	6.00601				-5.25169	10.5915	5.99864	5.11659
	-6.34131	-0.706637	-0.886576	5.12843				-6.34131	3.38577	6.8416	4.17276				-4.9226	8.61638	4.86263	5.91977				-4.9226	10.3683	5.76392	5.11659
	-5.26201	-2.39526	-2.56145	5.37668				-5.26201	3.84435	7.26201	4.0706				-4.70433	8.28584	4.67344	5.82273				-4.70433	10.1407	5.52529	5.11659
	-5.16335	-4.09776	-4.24306	5.6309				-5.16335	4.31701	7.6949	3.96582				-3.22666	7.95609	4.47062	5.71509				-3.22666	9.90931	5.28324	5.11659
	-3.92513	-4.76278	-4.59351	6.21797				-3.92513	4.55032	7.7708	3.81046				-3.26587	10.1712	6.35124	5.86377				-3.26587	9.94269	5.13241	5.28663
	-5.57514	-5.15064	-4.6029	6.87734				-5.57514	4.7177	7.75526	3.6457				-2.72153	13.8281	9.41327	6.13779				-2.72153	10.105	5.02158	5.54477
	-4.1825	-5.54134	-4.6076	7.55587				-4.1825	4.88913	7.73947	3.47647				-2.60251	17.6314	12.589	6.40342				-2.60251	10.266	4.91126	5.80293
	-8.18939	-4.87504	-3.49607	7.99127				-8.18939	4.94215	7.76236	3.44826				-3.32465	19.267	13.8952	6.60218				-3.32465	10.4763	4.79542	6.11058
	-5.64636	-2.74025	-0.850268	8.08067				-5.64636	4.83216	7.83749	3.61364				-1.95494	15.4998	10.5169	6.65828				-1.95494	10.8293	4.6534	6.56899
	-7.06262	-0.482873	1.92272	8.17214				-7.06262	4.7194	7.9145	3.7826				-3.48255	11.8996	7.21924	6.69448				-3.48255	11.1801	4.51003	7.02774
	-8.23773	1.7529	4.65587	8.26681				-8.23773	4.6287	8.00527	3.95585				-3.75908	8.58629	4.11151	6.71045				-3.75908	11.5186	4.36962	7.47318
	-5.4404	1.71493	4.81721	8.43628				-5.4404	5.06146	8.41866	4.23728				-3.84697	9.53936	4.52008	7.22979				-3.84697	11.8774	4.29654	7.88205
	-9.04256	1.67595	4.98257	8.60955				-9.04256	5.50172	8.84274	4.52619				-3.46805	10.9567	5.32298	7.80532				-3.46805	12.2367	4.2314	8.28517
	-8.16769	1.6369	5.14803	8.78247				-8.16769	5.93887	9.26745	4.81574				-2.76672	12.3475	6.11995	8.36805				-2.76672	12.5864	4.16805	8.6781
	-6.51473	2.83946	6.16813	8.4374				-6.51473	6.3175	9.4768	4.92144				-4.49345	12.1483	6.03366	8.249				-4.49345	12.8791	4.1786	8.94571
	-10.0313	4.75891	7.71047	7.80724				-10.0313	6.67647	9.57978	4.93148				-4.53313	10.4745	5.11681	7.4945				-4.53313	13.1127	4.25729	9.09103
	-10.0727	6.71434	9.30766	7.17344				-10.0727	7.03352	9.68328	4.9388				-4.63021	8.84886	4.22066	6.75483				-4.63021	13.3407	4.33373	9.23281
	-7.0526	6.39675	8.68651	6.88997				-7.0526	7.35308	9.66352	4.78406				-4.37772	7.67771	3.62488	6.16633				-4.37772	13.552	4.39972	9.37003
	-9.94743	0.0598176	2.21366	7.5299				-9.94743	7.60343	9.30802	4.18129				-3.98888	9.34351	4.9019	6.57059				-3.98888	13.6356	4.39644	9.46127
	-9.00309	-5.90862	-3.77115	8.15807				-9.00309	7.85284	8.95393	3.57535				-3.65066	10.9949	6.14112	6.95359				-3.65066	13.7172	4.3936	9.55049
	-9.59285	-11.4516	-9.24455	8.76332				-9.59285	8.09683	8.6078	2.97748				-3.89382	12.7107	7.40215	7.33385				-3.89382	13.8008	4.39107	9.64206
	-8.79813	-7.34848	-3.86291	8.62776				-8.79813	7.82986	7.89067	2.37639				-5.62829	12.9066	7.50509	7.43225				-5.62829	11.9865	4.3523	7.9592
	-7.92191	-1.39353	3.32029	8.38865				-7.92191	7.49479	7.1272	1.7789				-6.13494	12.6509	7.25489	7.43718				-6.13494	9.6497	4.30848	5.77856
	-9.77343	5.08945	10.803	8.1493				-9.77343	7.16736	6.38449	1.199				-4.48315	12.3915	6.98372	7.42938				-4.48315	7.25804	4.2693	3.53747
	-9.3019	7.97255	14.174	8.12657				-9.3019	7.14491	6.11072	0.981025				-4.3187	11.8485	6.42061	7.44165				-4.3187	5.86966	4.16108	2.31315
	-7.87966	6.64207	12.9655	8.32538				-7.87966	7.42693	6.31261	1.12898				-4.76669	10.8996	5.46376	7.49953				-4.76669	6.0412	3.94409	2.67746
	-8.20047	5.36164	11.8059	8.51879				-8.20047	7.69986	6.5095	1.27288				-5.07977	9.94735	4.50832	7.55829				-5.07977	6.21259	3.72211	3.04983
	-8.67624	4.26228	10.8531	8.72095				-8.67624	7.98017	6.74215	1.46401				-2.55776	9.0155	3.56951	7.62371				-2.55776	6.38295	3.50376	3.42127
	-8.97753	4.51372	11.3909	8.94892				-8.97753	8.27175	7.18004	1.95192				-2.52522	8.23855	2.21025	8.09717				-2.52522	6.72786	3.51754	3.73218
	-9.00902	4.76058	11.9166	9.17105				-9.00902	8.55382	7.60788	2.43171				-2.28026	7.49138	0.778127	8.54727				-2.28026	7.08108	3.53169	4.05053
	-11.9473	5.01488	12.4558	9.39814				-11.9473	8.84016	8.04652	2.92682				-6.29606	6.79416	-0.692435	8.96141				-6.29606	7.43418	3.54585	4.36869
	-10.5256	4.59242	11.8496	9.45958				-10.5256	8.96089	8.50966	3.4002				-5.55659	6.95018	-1.24617	9.61739				-5.55659	7.71688	3.64859	4.54647
	-10.385	3.97467	10.8936	9.46364				-10.385	9.02599	8.96999	3.85402				-4.18607	7.59855	-1.27028	10.4555				-4.18607	7.96976	3.80696	4.64948
	-10.4953	3.35676	9.91989	9.46467				-10.4953	9.09269	9.44199	4.31817				-5.349	8.24819	-1.29659	11.2866				-5.349	8.22107	3.96348	4.75248
	-11.8796	1.61551	7.90852	9.57816				-11.8796	9.17537	9.78344	4.60875				-7.11802	9.19651	-0.922399	11.9781				-7.11802	8.39937	4.12184	4.78964
	-11.0786	-1.84085	4.33398	9.87787				-11.0786	9.28234	9.90207	4.60875				-6.16349	11.2178	0.797099	12.3239				-6.16349	8.37013	4.30652	4.62648
	-11.5438	-5.22831	0.814368	10.1852				-11.5438	9.39196	10.0237	4.60874				-6.24085	13.304	2.58819	12.6694				-6.24085	8.33836	4.48977	4.46649
	-11.257	-8.47109	-2.57118	10.4927				-11.257	9.50166	10.1454	4.60874				-5.5382	15.3983	4.40132	13.0063				-5.5382	8.30492	4.66725	4.3134
	-12.0942	-1.93371	3.94332	9.76089				-12.0942	9.21912	9.44114	3.76236				-6.13236	14.6854	4.37783	12.3619				-6.13236	8.23678	4.64422	4.31077
	-12.0621	5.36592	11.2324	9.0044				-12.0621	8.92501	8.71725	2.90019				-6.07297	13.4988	4.04402	11.5526				-6.07297	8.1631	4.59005	4.33498
	-12.3703	13.2819	19.1614	8.24559				-12.3703	8.62779	7.99443	2.0466				-7.62476	12.3407	3.72236	10.7599				-7.62476	8.09093	4.53954	4.36053
	-12.4194	14.6932	20.8383	8.50462				-12.4194	8.64261	7.65993	1.56629				-6.39142	11.6146	3.58916	10.1814				-6.39142	7.79531	4.40997	4.25359
	-10.8841	11.9816	18.5126	9.3752				-10.8841	8.84577	7.56642	1.31616				-5.07093	11.3869	3.66506	9.85768				-5.07093	7.25823	4.19454	4.00211
	-11.1531	9.31462	16.2248	10.2679				-11.1531	9.05248	7.47159	1.05925				-2.58086	11.1622	3.74044	9.53723				-2.58086	6.72437	3.98178	3.75473
	-11.9	7.65541	14.8468	10.9569				-11.9	9.2158	7.40732	0.863008				-3.99209	10.873	3.73938	9.23137				-3.99209	6.25918	3.77249	3.57782
	-11.6212	8.86744	16.0833	10.9887				-11.6212	9.24291	7.43694	0.863004				-2.70326	10.0114	3.08057	9.03619				-2.70326	6.37895	3.58261	3.99025
	-11.549	10.1109	17.362	11.0202				-11.549	9.27064	7.46721	0.862999				-2.30777	9.15738	2.43065	8.84105				-2.30777	6.494	3.39999	4.40678
	-10.4466	11.3559	18.653	11.0508				-10.4466	9.29833	7.49745	0.863002				-2.77692	8.33131	1.80496	8.6506				-2.77692	6.60174	3.22869	4.81723
	-11.6806	8.71365	16.1826	11.0258				-11.6806	9.28349	7.79475	1.1632				-2.97469	7.76323	1.20318	8.59127				-2.97469	6.65286	3.15674	4.95822
	-14.1123	5.3457	13.1299	10.9712				-14.1123	9.2613	8.1437	1.51863				-2.82957	7.30391	0.597985	8.57053				-2.82957	6.68269	3.12217	4.99309
	-12.1674	1.95979	10.18	10.895				-12.1674	9.23909	8.49319	1.87248				-2.20172	6.86119	-0.0116804	8.5362				-2.20172	6.71185	3.08842	5.02739
	-13.2893	0.605542	8.91331	10.7831				-13.2893	9.28184	8.84271	2.24734				-2.45679	7.32197	0.318111	8.56113				-2.45679	6.76713	3.10007	5.05024
	-13.468	1.43405	9.36045	10.6399				-13.468	9.39882	9.21234	2.66981				-2.71112	9.54	2.50221	8.71732				-2.71112	6.86982	3.19714	5.05025
	-13.0659	2.25641	9.81241	10.4927				-13.0659	9.51511	9.58156	3.09309				-4.5344	11.8016	4.71145	8.86667				-4.5344	6.96978	3.29161	5.05025
	-11.3441	3.02651	10.2806	10.3739				-11.3441	9.61696	9.91858	3.50172				-4.02808	14.2008	7.03808	9.01583				-4.02808	7.07146	3.38771	5.05025
	-9.91388	3.53248	11.004	10.5569				-9.91388	9.6041	10.0193	3.86649				-2.24819	12.9573	5.09841	9.65607				-2.24819	6.95712	3.27964	5.05025
	-11.5684	4.04139	11.7299	10.74				-11.5684	9.59169	10.1202	4.23308				-3.18333	11.7249	3.13111	10.2916				-3.18333	6.83881	3.16782	5.05025
	-12.3887	4.54105	12.441	10.9187				-12.3887	9.58	10.2188	4.59274				-2.15039	10.5521	1.16784	10.939				-2.15039	6.7169	3.0526	5.05024
	-11.6887	5.72471	13.8102	11.0927				-11.6887	9.71374	10.4404	4.77274				-1.8799	9.77191	0.992168	10.3787				-1.8799	5.07699	3.15766	3.261
	-13.294	7.19905	15.4624	11.263				-13.294	9.90788	10.7123	4.874				-2.55798	9.25945	1.97801	9.03103				-2.55798	2.44312	3.42526	0.315538
	-12.9931	8.65189	17.0946	11.4293				-12.9931	10.0973	10.9778	4.97292				-1.65437	8.77394	2.9881	7.64376				-1.65437	-0.298083	3.72453	-2.72594
	-13.1188	9.07243	17.3607	11.226				-13.1188	9.93387	10.9962	4.86813				-1.33967	8.29027	3.92023	6.29458				-1.33967	-2.46256	3.95074	-5.08811
	-13.9134	7.30297	14.7467	10.2653				-13.9134	9.02467	10.4989	4.33669				-1.27842	7.71083	4.54858	5.13243				-1.27842	-2.42383	3.83539	-4.94811
	-14.2092	5.58698	12.2189	9.33258				-14.2092	8.11122	10.0152	3.80776				-1.237	7.13846	5.18309	3.9347				-1.237	-2.38506	3.71639	-4.80446
	-12.6924	3.84127	9.65453	8.38245				-12.6924	7.14894	9.52145	3.25502				0.177544	6.58929	5.80687	2.73274				0.177544	-2.34731	3.59681	-4.66085
	-11.5961	4.94192	10.1782	7.76594				-11.5961	6.93066	9.26127	3.12348				-0.0504973	9.04766	8.11983	2.69591				-0.0504973	-2.36266	3.26827	-4.42678
	-11.5124	6.16413	10.8582	7.17813				-11.5124	6.75448	9.01878	3.01601				1.20591	12.2728	10.9624	2.88784				1.20591	-2.39633	2.88145	-4.16595
	-11.2477	7.42567	11.5755	6.5739				-11.2477	6.57393	8.77055	2.90604				1.18534	15.6023	13.9337	3.07958				1.18534	-2.43826	2.48648	-3.90278
	-10.8076	7.2997	11.2031	6.46783				-10.8076	6.28544	8.51914	2.90109				1.35022	16.9692	15.1159	3.22079				1.35022	-2.48656	2.29685	-3.79117
	-7.60455	6.18982	10.054	6.725				-7.60455	5.92532	8.27138	2.97171				2.01645	15.9044	14.0408	3.30602				2.01645	-2.53769	2.35867	-3.86217
	-7.43855	5.08072	8.89557	6.98829				-7.43855	5.55709	8.01877	3.04356				1.81693	14.8544	12.9699	3.3892				1.81693	-2.58899	2.42084	-3.93198
	-7.71208	4.60756	8.3766	7.16663				-7.71208	5.26099	7.82676	3.1197				2.03396	13.8783	11.9404	3.49254				2.03396	-2.63167	2.47423	-3.98696
	-7.52847	6.60874	10.3851	7.00179				-7.52847	5.25656	7.87647	3.21348				0.575051	13.4299	11.0791	3.9785				0.575051	-2.5553	2.40921	-3.85202
	-7.21346	8.69233	12.4862	6.83262				-7.21346	5.25204	7.92728	3.30941				1.34743	12.9972	10.2294	4.46505				1.34743	-2.47929	2.34407	-3.71714
	-9.65854	10.8138	14.6364	6.6628				-9.65854	5.24755	7.97812	3.40543				1.5692	12.5894	9.40975	4.94158				1.5692	-2.40528	2.28024	-3.58523
	-8.3105	10.4251	14.4255	6.98211				-8.3105	5.19695	7.93532	3.42258				1.97088	12.9788	9.37862	5.3834				1.97088	-2.36904	2.24611	-3.54443
	-6.05233	9.46651	13.6816	7.4236				-6.05233	5.13425	7.87	3.42258				1.42918	13.7373	9.71877	5.80544				1.42918	-2.35079	2.22693	-3.54603
	-7.96867	8.52411	12.9521	7.86541				-7.96867	5.07171	7.80483	3.42258				2.60651	14.4794	10.0539	6.21831				2.60651	-2.33297	2.2089	-3.54653
	-9.5539	9.12591	13.86	8.25516				-9.5539	5.33363	8.10127	3.46652				0.123125	15.1045	10.3863	6.51383				0.123125	-2.29902	2.21966	-3.54624
	-8.21991	11.8278	17.0333	8.59911				-8.21991	6.04358	8.89784	3.57154				-0.251164	15.4286	10.6918	6.52429				-0.251164	-2.22996	2.29437	-3.54624
	-9.4178	14.5733	20.2816	8.94451				-9.4178	6.75682	9.6989	3.67688				2.6721	15.7474	10.9927	6.5345				2.6721	-2.16251	2.36737	-3.54624
	-10.7041	17.0823	23.2949	9.28671				-10.7041	7.44348	10.4716	3.7793				1.41009	16.0745	11.3018	6.54493				1.41009	-2.09377	2.44179	-3.54624
	-9.11938	15.2319	21.6664	9.76717				-9.11938	7.95247	11.0617	3.8826				1.32754	13.7424	9.09976	6.44763				1.32754	-2.01549	2.38592	-3.41799
	-12.4987	13.4047	20.0764	10.2461				-12.4987	8.46221	11.6533	3.98599				1.6039	11.3415	6.83606	6.34448				1.6039	-1.93881	2.32165	-3.28347
	-12.3581	11.6015	18.524	10.7236				-12.3581	8.97269	12.2463	4.08947				1.59008	8.95349	4.58845	6.23805				1.59008	-1.86032	2.25544	-3.14518
	-13.8622	10.7822	17.6454	11.0217				-13.8622	8.76914	12.166	3.68986				1.90834	7.86099	3.31842	6.34097				1.90834	-1.42229	2.17714	-2.68909
	-12.8702	10.3999	17.0445	11.2425				-12.8702	8.21032	11.7641	3.03812				1.91666	7.77166	2.76928	6.59639				1.91666	-0.695998	2.09058	-1.97375
	-13.0058	10.0281	16.4461	11.4588				-13.0058	7.63944	11.3627	2.38632				-0.342483	7.69034	2.20385	6.82624				-0.342483	0.0154284	2.00721	-1.26696
	-11.7305	9.56417	15.7341	11.542				-11.7305	7.29502	11.1428	1.93604				0.165432	7.87434	1.98791	6.99382				0.165432	0.666454	1.98277	-0.659265
	-11.5869	8.82068	14.6869	11.3196				-11.5869	7.49436	11.3425	1.93603				-2.62147	9.3439	3.64801	6.93201				-2.62147	0.959465	2.24199	-0.620459
	-11.2539	8.0818	13.6455	11.0975				-11.2539	7.69393	11.5424	1.93604				-3.95541	10.8215	5.29559	6.87012				-3.95541	1.24188	2.49249	-0.582486
	-11.1608	7.36499	12.6344	10.8809				-11.1608	7.88897	11.7378	1.93604				-3.7311	12.3861	7.0189	6.80473				-3.7311	1.52919	2.748	-0.543249
	-10.3148	5.32345	10.2096	10.7478				-10.3148	7.72973	11.4025	1.92323				-2.64419	13.2762	7.81729	7.01827				-2.64419	1.60651	2.86277	-0.58764
	-10.7364	3.18773	7.69786	10.6235				-10.7364	7.53591	11.0138	1.90795				-1.97585	13.9712	8.35067	7.2904				-1.97585	1.62944	2.9409	-0.651011
	-10.8217	1.14051	5.29864	10.502				-10.8217	7.34826	10.6347	1.89186				-3.29588	14.6857	8.88622	7.56164				-3.29588	1.65258	3.02224	-0.714804
	-10.2368	2.10654	6.49112	10.2582				-10.2368	7.20986	10.253	1.96923				-1.16874	14.1159	8.22573	7.70545				-1.16874	1.66805	3.04867	-0.725304
	-9.71219	5.953	11.0151	9.90892				-9.71219	7.11969	9.87719	2.12738				-2.33914	11.8545	6.01906	7.67985				-2.33914	1.67293	2.99885	-0.663194
	-9.7854	9.98501	15.6369	9.56689				-9.7854	7.03379	9.50999	2.27874				-4.52585	9.61881	3.85255	7.65338				-4.52585	1.67776	2.94905	-0.598444
	-9.13961	13.5417	19.6601	9.32022				-9.13961	7.0525	9.25979	2.4839				-1.7083	7.55221	1.8698	7.62561				-1.7083	1.67238	2.90893	-0.549894
	-9.51447	12.6031	18.8425	9.63801				-9.51447	7.63416	9.69083	2.98043				-1.72518	7.49393	1.90251	7.57299				-1.72518	1.42795	3.06798	-0.911281
	-11.4892	11.695	18.0515	9.95008				-11.4892	8.19465	10.1139	3.46705				-2.82811	7.43427	1.93525	7.51822				-2.82811	1.17526	3.22953	-1.28103
	-10.2133	10.7786	17.2531	10.2697				-10.2133	8.75786	10.547	3.96472				-1.71199	7.37464	1.96721	7.46256				-1.71199	0.920239	3.38964	-1.65032
	-12.0883	9.48912	16.3844	10.6971				-12.0883	9.17984	10.7009	4.11167				-1.802	6.45672	0.954529	7.51617				-1.802	0.652622	3.52106	-2.02559
	-11.8764	8.12147	15.5359	11.1352				-11.8764	9.54962	10.7732	4.15326				-1.66935	5.10889	-0.624398	7.6205				-1.66935	0.369324	3.64283	-2.4161
	-11.9178	6.709	14.6848	11.5761				-11.9178	9.92564	10.8481	4.19145				-1.47304	3.82216	-2.18639	7.71434				-1.47304	0.0838731	3.76571	-2.80725
	-12.4757	4.68911	12.8085	11.8973				-12.4757	10.0174	10.8355	4.05366				-1.32224	4.046	-2.00764	7.66981				-1.32224	-0.127411	3.88573	-3.13482
	-12.8915	1.94244	9.52696	12.0468				-12.8915	9.69542	10.6958	3.66769				-2.05162	8.66752	3.20363	7.26256				-2.05162	-0.15221	4.0143	-3.30905
	-12.5934	-0.728012	6.25515	12.1976				-12.5934	9.35953	10.5525	3.2701				-1.11183	13.9082	8.88976	6.84151				-1.11183	-0.177728	4.15574	-3.46914
	-13.5243	-3.00119	3.3311	12.3164				-13.5243	9.012	10.4284	2.89319				-2.40799	19.5661	14.8428	6.41493				-2.40799	-0.203504	4.30708	-3.61259
	-13.5091	5.37141	11.2912	11.2267				-13.5091	8.44702	11.0859	3.42436				-3.08897	13.6354	9.76987	5.65974				-3.08897	-0.148808	4.23218	-3.48671
	-13.7007	14.5263	20.3853	10.0612				-13.7007	7.85402	11.7624	3.92447				-2.27209	6.60881	3.79393	4.86559				-2.27209	-0.084835	4.12947	-3.31702
	-12.0248	24.1676	30.4532	8.84947				-12.0248	7.24765	12.4396	4.37863				-2.74116	0.36071	-1.31785	4.09353				-2.74116	-0.0238709	4.03247	-3.14221
	-11.7115	25.1487	30.6579	7.77381				-11.7115	6.95674	12.6218	4.34593				-3.51474	-2.12951	-3.1799	3.68261				-3.51474	-0.129878	4.03416	-3.22191
	-11.6237	21.2111	24.8598	6.73162				-11.6237	6.84132	12.5255	4.04952				-2.96796	-1.30971	-2.34226	3.64245				-2.96796	-0.399218	4.13173	-3.56048
	-11.767	17.4937	19.145	5.66395				-11.767	6.72513	12.4292	3.75358				-3.34769	-0.484676	-1.50797	3.60231				-3.34769	-0.662565	4.22639	-3.89045
	-12.0498	13.6543	13.8114	5.28127				-12.0498	6.69424	12.3334	3.33326				-2.25675	0.238678	-0.766598	3.55801				-2.25675	-0.950787	4.31753	-4.2446
	-12.4157	8.55072	9.09869	6.98205				-12.4157	6.92407	12.23	2.49754				-2.94155	-0.0379418	-0.915287	3.49855				-2.94155	-1.35435	4.37088	-4.69982
	-13.1675	3.58601	4.80187	8.64628				-13.1675	7.1587	12.1275	1.66884				-2.92882	-0.307011	-1.05841	3.43912				-2.92882	-1.74939	4.42397	-5.14033
	-12.3354	-1.11845	0.962192	10.232				-12.3354	7.39236	12.0284	0.866665				-1.69791	-0.58166	-1.20292	3.37685				-1.69791	-2.15512	4.4794	-5.58753
	-13.4278	-1.98761	0.401061	10.8779				-13.4278	8.39717	12.9973	1.08596				-2.42408	0.090717	-0.88427	3.67346				-2.42408	-2.23762	4.48879	-5.69082
	-15.3209	-2.24874	0.339114	11.377				-15.3209	9.51577	14.1378	1.46809				-1.67122	1.05734	-0.413658	4.07866				-1.67122	-2.21393	4.48665	-5.67564
	-15.0911	-2.49929	0.280763	11.8673				-15.0911	10.6043	15.2583	1.84304				-1.72765	2.05383	0.0809703	4.49354				-1.72765	-2.18971	4.48886	-5.65293
	-13.837	-1.27851	2.1666	12.2045				-13.837	11.2918	15.9608	2.31954				-0.694371	3.79266	1.40996	4.77465				-0.694371	-2.15642	4.51389	-5.63502
	-16.3182	1.61908	6.18616	12.3672				-16.3182	11.5393	16.1998	2.89555				-0.298263	6.83336	4.18412	4.82878				-0.298263	-2.10897	4.5698	-5.63501
	-16.4712	4.6294	10.2481	12.5225				-16.4712	11.7772	16.4336	3.46061				-0.389038	10.1325	7.19805	4.88248				-0.389038	-2.06055	4.6269	-5.63501
	-15.4912	7.4993	14.03	12.6236				-15.4912	12.0021	16.6587	3.97564				-0.146527	13.5988	10.3685	4.93442				-0.146527	-2.01228	4.68385	-5.63501
	-16.7275	7.31959	13.8115	12.2927				-16.7275	12.1131	16.7719	3.97564				-1.41168	7.2072	4.32945	5.03726				-1.41168	-1.54808	4.65204	-5.17692
	-16.8748	7.13683	13.5934	11.9623				-16.8748	12.2238	16.8851	3.97565				-3.16009	1.37638	-1.25565	5.12886				-3.16009	-1.07195	4.62681	-4.68935
	-16.9261	6.9544	13.3798	11.6382				-16.9261	12.3325	16.996	3.97565				-3.07184	-3.52334	-6.04243	5.20623				-3.07184	-0.596963	4.60941	-4.18546
	-16.9543	7.29983	13.2462	11.0746				-16.9543	11.8355	16.6665	3.82967				-2.03243	-4.03839	-6.66758	5.4395				-2.03243	-0.464578	4.68228	-4.08184
	-18.637	7.83708	13.1481	10.4229				-18.637	11.1107	16.178	3.6278				-2.48678	-2.24551	-5.10675	5.75772				-2.48678	-0.541243	4.80706	-4.22585
	-17.2404	8.3587	13.0582	9.7838				-17.2404	10.3961	15.7037	3.42775				-2.48558	-0.296038	-3.45325	6.07				-2.48558	-0.619997	4.93743	-4.36989
	-17.6551	9.25425	13.5701	9.28407				-17.6551	10.0625	15.6649	3.56636				-6.14293	1.12601	-2.33842	6.36028				-6.14293	-0.677263	5.04212	-4.47735
	-17.5678	10.8128	15.1812	9.07534				-17.5678	10.4627	16.4333	4.3342				-6.84346	0.598185	-3.04559	6.60925				-6.84346	-0.665461	5.05674	-4.47736
	-16.8081	12.3522	16.7799	8.87151				-16.8081	10.8486	17.1824	5.08753				-2.90726	0.0840117	-3.74537	6.86383				-2.90726	-0.653397	5.07167	-4.47735
	-17.1227	13.9535	18.4509	8.66182				-17.1227	11.2405	17.9519	5.86618				-4.0453	-0.40319	-4.4198	7.11795				-4.0453	-0.641385	5.08658	-4.47736
	-16.7645	13.3391	17.9386	8.70322				-16.7645	11.5475	19.0814	7.43201				-3.39937	0.224124	-2.97314	6.20959				-3.39937	-0.554052	5.0445	-4.40085
	-16.8901	12.6836	17.3955	8.74588				-16.8901	11.8396	20.1906	8.99617				-2.89655	1.21907	-1.02108	5.08762				-2.89655	-0.452199	4.9955	-4.30539
	-16.3791	12.005	16.8442	8.78624				-16.3791	12.133	21.3245	10.6166				-3.4354	2.39851	1.05689	3.96513				-3.4354	-0.350365	4.95027	-4.20506
	-18.6863	12.0169	16.8519	8.98399				-18.6863	12.4391	22.2006	11.9027				-5.65224	2.9955	1.93039	3.57391				-5.65224	-0.378263	4.92688	-4.23799
	-18.9455	12.4686	17.2233	9.27566				-18.9455	12.7445	22.8882	12.939				-4.10859	2.83694	1.41925	3.97026				-4.10859	-0.551833	4.92495	-4.4215
	-19.5298	12.9132	17.605	9.56721				-19.5298	13.0518	23.5917	14.0097				-2.46554	2.68944	0.9089	4.36395				-2.46554	-0.725242	4.92542	-4.60019
	-20.4966	13.3941	18.0222	9.68715				-20.4966	13.0579	23.9277	14.8891				-3.73872	2.53405	0.426292	4.71331				-3.73872	-0.910097	4.92199	-4.78008
	-19.0823	14.0503	18.5509	9.24124				-19.0823	12.0544	23.0057	15.0657				-1.97438	2.14599	0.0912721	4.72443				-1.97438	-1.26872	4.85431	-5.06999
	-19.1561	14.7349	19.1002	8.78659				-19.1561	11.0305	22.0651	15.2458				-1.77715	1.76201	-0.237201	4.73486				-1.77715	-1.62734	4.7883	-5.35755
	-19.2226	15.432	19.6576	8.33407				-19.2226	10.0108	21.1285	15.4251				-2.62719	1.39117	-0.551445	4.74438				-2.62719	-1.97744	4.72546	-5.63595
	-19.0367	14.2625	18.2091	8.21224				-19.0367	9.30072	20.603	15.2985				-3.46719	0.680169	-1.27519	4.8753				-3.46719	-2.06109	4.76963	-5.74795
	-19.8592	12.7211	16.3632	8.1489				-19.8592	8.62122	20.1401	15.1069				-1.5274	-0.140125	-2.13438	5.05675				-1.5274	-2.03082	4.85801	-5.78837
	-20.0957	11.197	14.5434	8.08551				-20.0957	7.93445	19.6781	14.9113				-0.985499	-0.906801	-2.93427	5.23381				-0.985499	-2.00175	4.94376	-5.82757
	-20.1675	11.6476	15.1594	8.07396				-20.1675	7.51843	19.4381	14.8408				0.447766	-1.16787	-3.19775	5.23916				0.447766	-1.56882	4.91398	-5.39189
	-19.9656	14.5422	18.7495	8.12245				-19.9656	7.41104	19.4498	14.9193				-2.90919	-0.38811	-2.34459	4.87719				-2.90919	-0.321395	4.64414	-3.99031
	-20.8398	17.5488	22.4214	8.16924				-20.8398	7.30375	19.4614	14.9972				-4.10252	0.421367	-1.436	4.51098				-4.10252	0.885579	4.37853	-2.62598
	-20.8884	20.1983	25.6766	8.28621				-20.8884	7.26055	19.5312	15.068				-3.51256	1.2989	-0.431192	4.12285				-3.51256	2.11059	4.10422	-1.23256
	-23.2117	17.3697	23.2367	9.41295				-23.2117	8.07518	20.4131	15.068				-3.24825	0.657224	-1.25626	4.21506				-3.24825	2.15386	4.01646	-1.11989
	-22.5118	14.6492	20.8959	10.5489				-22.5118	8.89351	21.2987	15.0679				-2.53075	-0.0213687	-2.159	4.31987				-2.53075	2.13836	3.93962	-1.07204
	-22.417	12.099	18.7027	11.6665				-22.417	9.69595	22.1665	15.068				-3.00332	-0.691646	-3.08967	4.41778				-3.00332	2.1221	3.86054	-1.02276
	-22.1076	12.3456	19.0232	11.6571				-22.1076	9.94989	22.2639	14.7266				-4.06409	-0.340283	-3.013	4.61933				-4.06409	2.07664	3.72442	-0.949503
	-23.0514	13.8772	20.493	11.1298				-23.0514	9.94822	22.0046	14.2331				-4.10575	0.74375	-2.19406	4.89602				-4.10575	2.01007	3.55014	-0.860458
	-23.9888	15.4092	21.9538	10.6184				-23.9888	9.94673	21.7511	13.7532				-3.73184	1.87211	-1.33913	5.17863				-3.73184	1.94042	3.37178	-0.76912
	-23.0287	15.6887	22.0193	10.201				-23.0287	9.92672	21.5321	13.4409				-4.19412	2.51789	-0.935157	5.42525				-4.19412	1.87303	3.22646	-0.702914
	-23.207	13.0578	18.8949	10.0166				-23.207	9.8658	21.4056	13.5252				-3.87445	1.19806	-2.36653	5.52574				-3.87445	1.82136	3.21564	-0.738757
	-23.149	10.5446	15.9208	9.83737				-23.149	9.80691	21.2826	13.607				-3.84762	-0.0823825	-3.77243	5.62747				-3.84762	1.76851	3.20474	-0.775204
	-22.6493	8.01261	12.9352	9.65362				-22.6493	9.74685	21.1565	13.6906				-2.72474	-1.29023	-5.11703	5.72819				-2.72474	1.71566	3.19404	-0.811409
	-22.8171	8.54316	13.4338	9.61619				-22.8171	10.0188	21.4445	13.6961				-3.46769	-0.907598	-4.80297	5.88296				-3.46769	1.68275	3.16634	-0.817856
	-22.9923	9.26966	14.1621	9.58907				-22.9923	10.3075	21.7544	13.6961				-3.4882	-0.150182	-4.11026	6.0525				-3.4882	1.65316	3.13382	-0.817854
	-22.4881	10.0148	14.9143	9.56066				-22.4881	10.6037	22.0723	13.6961				-0.120618	0.620692	-3.4156	6.21851				-0.120618	1.62356	3.10131	-0.817854
	-22.8764	10.2169	15.3556	10.0338				-22.8764	10.6069	22.0359	13.4357				-2.453	0.478873	-3.70356	6.4685				-2.453	1.72105	3.23292	-0.836837
	-23.2344	9.99336	15.5434	10.8951				-23.2344	10.379	21.7229	12.9785				-1.8571	-0.812146	-5.21771	6.84835				-1.8571	1.989	3.58612	-0.881994
	-23.9148	9.77063	15.7385	11.7812				-23.9148	10.1442	21.4034	12.5134				-3.94157	-1.98071	-6.58893	7.22854				-3.94157	2.25145	3.93381	-0.926979
	-24.858	9.81228	16.1942	12.5508				-24.858	10.0485	21.1587	11.9911				-3.62127	-2.91948	-7.68644	7.57866				-3.62127	2.49713	4.26162	-0.970367
	-23.6258	11.0578	17.842	12.7445				-23.6258	10.6077	21.2596	11.204				-2.12102	-2.107	-6.69331	7.49603				-2.12102	2.66178	4.49801	-1.01176
	-23.0652	12.2875	19.4668	12.9338				-23.0652	11.1602	21.3567	10.4376				-2.82655	-1.23698	-5.66969	7.40732				-2.82655	2.82328	4.73102	-1.05291
	-22.7912	13.5611	21.1474	13.128				-22.7912	11.7329	21.4551	9.65462				-2.71808	-0.311018	-4.61744	7.31253				-2.71808	2.98163	4.96063	-1.09382
	-23.9244	13.3235	21.39	13.7835				-23.9244	12.4301	21.9763	9.36019				-6.27115	0.670337	-4.10212	7.73575				-6.27115	3.6943	4.9595	-0.429166
	-23.4141	12.73	21.2842	14.5364				-23.4141	13.143	22.5893	9.19052				-6.57327	1.69865	-3.8264	8.42211				-6.57327	4.69241	4.84954	0.593142
	-24.944	12.1285	21.1834	15.3092				-24.944	13.8771	23.2193	9.01676				-6.73714	2.72987	-3.54548	9.10963				-6.73714	5.68637	4.73876	1.61549
	-26.5228	11.1447	20.5245	16.0609				-26.5228	14.5117	23.8033	8.75162				-5.88969	3.57057	-3.22718	9.56503				-5.88969	6.39424	4.68786	2.32136
	-24.1107	9.70591	19.1531	16.7699				-24.1107	15.0025	24.3123	8.37131				-5.83362	4.02147	-2.79304	9.49451				-5.83362	6.4781	4.77883	2.32136
	-24.57	8.28823	17.7807	17.4995				-24.57	15.5125	24.834	7.98276				-6.16652	4.48206	-2.34426	9.42316				-6.16652	6.5615	4.86938	2.32137
	-26.06	6.98831	16.5246	18.2114				-26.06	16.0009	25.3182	7.5991				-6.65968	4.94088	-1.89233	9.35268				-6.65968	6.64246	4.95736	2.32135
	-23.4045	6.99695	17.0373	18.4748				-23.4045	15.8913	25.0163	7.30297				-6.71727	6.2804	-0.460636	9.15493				-6.71727	6.32638	4.86165	2.10465
	-23.9335	7.0062	17.5616	18.7362				-23.9335	15.7788	24.7078	7.00075				-7.57917	7.7841	1.1541	8.94471				-7.57917	5.96984	4.74639	1.8663
	-23.9301	7.01585	18.0861	18.9895				-23.9301	15.666	24.3994	6.69905				-8.07378	9.3269	2.81315	8.73956				-8.07378	5.62133	4.63296	1.63375
	-23.7631	6.37835	17.4457	18.9532				-23.7631	15.6911	24.1921	6.38264				-6.99678	7.97593	1.88325	8.34768				-6.99678	5.07419	4.51358	1.21858
	-22.7116	5.39125	16.1975	18.7711				-22.7116	15.7877	24.0288	6.04719				-7.40886	4.18022	-1.20412	7.79608				-7.40886	4.35971	4.3912	0.646841
	-26.0979	4.40846	14.9604	18.5891				-26.0979	15.8846	23.8655	5.71202				-5.98622	0.728659	-3.93317	7.25701				-5.98622	3.66066	4.27054	0.0867793
	-25.2804	3.54702	13.9052	18.502				-25.2804	16.1076	23.8665	5.4666				-5.76416	-1.91966	-5.94986	6.80993				-5.76416	2.9396	4.18939	-0.528708
	-23.9373	2.91797	13.2064	18.6563				-23.9373	16.6831	24.3014	5.43304				-4.16763	-1.27433	-5.38927	6.92741				-4.16763	2.18352	4.34255	-1.37301
	-21.0689	2.29587	12.5118	18.8112				-21.0689	17.259	24.7383	5.39872				-5.81537	-0.62762	-4.83264	7.04097				-5.81537	1.43838	4.49122	-2.20067
	-22.0681	1.69885	11.8419	18.962				-22.0681	17.8181	25.1643	5.36471				-3.37358	0.0477157	-4.25646	7.15546				-3.37358	0.672546	4.64171	-3.04683
	-22.8652	0.895736	10.9223	18.8854				-22.8652	17.1269	24.1049	4.8116				-5.3257	0.448997	-3.44802	6.81842				-5.3257	0.136864	4.77266	-3.66462
	-22.4669	0.0699416	9.98145	18.78				-22.4669	16.2773	22.8649	4.19756				-1.54586	0.789486	-2.59729	6.35693				-1.54586	-0.321861	4.89612	-4.203
	-22.727	-0.735005	9.07076	18.6769				-22.727	15.4445	21.6574	3.6008				-4.22205	1.17237	-1.72336	5.87344				-4.22205	-0.79553	5.0243	-4.75683
	-21.2548	-0.922754	8.62979	18.3287				-21.2548	15.3368	21.1549	3.32196				-4.86516	2.52756	-0.413666	5.77933				-4.86516	-0.745323	5.08125	-4.75549
	-20.2863	-0.501757	8.65345	17.7493				-20.2863	15.936	21.3512	3.35245				-3.5099	5.31619	1.61381	6.26399				-3.5099	0.0663455	5.0318	-3.94769
	-22.4661	-0.0877037	8.67827	17.1836				-22.4661	16.5127	21.5441	3.37494				-4.48805	8.29983	3.8513	6.76211				-4.48805	0.897975	4.98087	-3.11933
	-21.56	0.477082	8.91837	16.7634				-21.56	16.9803	21.6791	3.38888				-5.32742	11.1614	6.01081	7.27423				-5.32742	1.73531	4.92599	-2.28242
	-22.2392	1.90865	10.5333	17.3648				-22.2392	16.7094	21.405	3.38888				-6.3691	5.0575	-0.585078	8.24352				-6.3691	2.77265	4.7417	-1.1456
	-20.6936	3.27816	12.1273	17.9507				-20.6936	16.4453	21.1378	3.38888				-6.48178	0.123531	-6.37196	9.18702				-6.48178	3.83298	4.58512	0.0440656
	-19.7799	4.65136	13.7784	18.5501				-19.7799	16.175	20.8644	3.38888				-8.08645	-3.2546	-10.8922	10.0762				-8.08645	4.88866	4.46171	1.25509
	-19.5911	3.63069	12.8683	18.8889				-19.5911	15.9692	20.4616	3.08059				-7.34947	-2.76928	-11.8287	10.7698				-7.34947	5.51009	4.42516	1.91203
	-20.9956	1.89337	11.2074	19.1317				-20.9956	15.7873	20.0273	2.68387				-9.75664	-0.461228	-10.9553	11.3688				-9.75664	5.90658	4.42458	2.26709
	-20.2562	0.124601	9.55023	19.371				-20.2562	15.6008	19.5846	2.28048				-8.82804	2.11609	-9.65497	11.9294				-8.82804	6.30287	4.42431	2.62252
	-20.9219	-1.61157	7.89941	19.6756				-20.9219	15.3895	19.1904	1.99128				-9.45454	4.7246	-7.46348	12.2097				-9.45454	6.78834	4.46764	3.00971
	-20.8605	-3.23347	6.27779	20.0873				-20.8605	15.1446	18.8837	1.891				-11.556	7.34763	-3.2736	11.7166				-11.556	7.59207	4.65358	3.53725
	-21.0349	-4.8569	4.65755	20.5066				-21.0349	14.8943	18.5704	1.78858				-9.14087	10.4446	1.09398	11.1373				-9.14087	8.39504	4.85085	4.07606
	-20.5667	-6.43629	3.08534	20.9222				-20.5667	14.6456	18.2584	1.68621				-11.6498	13.891	5.47805	10.4908				-11.6498	9.17812	5.05433	4.61272
	-19.884	-5.52047	4.36767	20.8854				-19.884	14.8344	18.2208	1.57332				-11.5738	14.9167	6.41129	10.6266				-11.5738	9.24229	5.44261	4.33422
	-20.1828	-4.55844	5.69812	20.8473				-20.1828	15.0271	18.1826	1.45633				-15.5728	15.5171	6.77703	10.8908				-15.5728	9.17816	5.84643	3.92673
	-20.1398	-3.5721	7.04592	20.809				-20.1398	15.2189	18.1448	1.33796				-13.0428	16.1056	7.13	11.1458				-13.0428	9.10165	6.22924	3.52932
	-19.8399	-3.44407	7.37557	20.7512				-19.8399	15.1974	18.0031	1.31697				-11.6191	14.7236	5.84251	11.1012				-11.6191	8.66896	6.42646	2.96469
	-18.9033	-3.8537	7.08256	20.6783				-18.9033	15.0442	17.7922	1.35569				-12.0009	11.3709	2.98935	10.7387				-12.0009	7.87448	6.43231	2.23241
	-21.73	-4.26784	6.78948	20.6037				-21.73	14.8911	17.5805	1.39435				-11.3438	8.24666	0.420956	10.3823				-11.3438	7.0964	6.43894	1.51753
	-12.7706	0.977055	9.00896	13.9752				-12.7706	10.6311	14.5972	-0.51219				-9.93735	5.50528	-1.70089	10.0002				-9.93735	6.39306	6.45064	0.86917
	-11.6751	1.98216	10.2273	14.2407				-11.6751	11.4849	15.3387	-0.302864				-9.23083	5.04707	-1.66802	9.48987				-9.23083	6.4335	6.49461	0.869178
	-14.485	2.96522	11.4266	14.5003				-14.485	12.3135	16.0652	-0.0991009				-9.47377	4.59057	-1.63512	8.98092				-9.47377	6.4737	6.53835	0.869167
	-15.245	2.73648	11.2642	14.9631				-15.245	12.8697	16.5533	-0.045039				-9.53122	4.14398	-1.60273	8.48249				-9.53122	6.51297	6.58109	0.869165
	-17.6843	-0.0116517	8.17212	15.8519				-17.6843	12.8051	16.4861	-0.322266				-9.70739	3.93844	-1.90492	8.49674				-9.70739	6.83614	6.42483	1.30459
	-16.9966	-2.49133	5.26742	16.7252				-16.9966	12.7414	16.4206	-0.592639				-11.4835	3.82799	-2.34157	8.69005				-11.4835	7.25634	6.19422	1.89688
	-17.5751	-4.82636	2.40281	17.6258				-17.5751	12.6756	16.3536	-0.869339				-10.4634	3.72525	-2.78118	8.86662				-10.4634	7.65953	5.96743	2.47294
	-17.3268	-4.85308	1.99996	16.9625				-17.3268	12.518	16.3223	-1.22766				-10.4984	3.31	-3.4597	8.99992				-10.4984	7.77516	5.85014	2.7039
	-15.0143	-4.73954	1.75492	16.2218				-15.0143	12.3558	16.2941	-1.58435				-10.9	2.359	-4.49977	9.0631				-10.9	7.35983	5.94816	2.29158
	-14.8137	-4.61926	1.50373	15.4669				-14.8137	12.1867	16.2651	-1.95176				-9.17509	1.47411	-5.47853	9.12341				-9.17509	6.95333	6.04769	1.90012
	-14.6017	-4.79514	1.4548	15.6651				-14.6017	12.5814	16.5499	-2.40698				-9.85707	0.609728	-6.44629	9.18405				-9.85707	6.53415	6.15397	1.50891
	-14.7798	-5.18663	1.56191	16.5823				-14.7798	13.4055	17.0698	-2.91546				-8.75804	0.509962	-6.0783	8.78456				-8.75804	5.6311	6.21759	0.846265
	-15.562	-5.57747	1.67311	17.524				-15.562	14.2603	17.6065	-3.43236				-8.39831	0.436283	-5.68711	8.38404				-8.39831	4.73765	6.31012	0.239353
	3.0006	-13.2413	-16.1655	12.3369				3.0006	5.70926	8.5339	-11.2143				-6.04271	0.368744	-5.28303	7.97321				-6.04271	3.82107	6.43732	-0.333712
	6.6223	-12.0558	-13.9256	12.4075				6.6223	5.41673	8.03607	-11.427				-7.0626	0.792951	-5.24541	8.36359				-7.0626	2.98376	6.56851	-0.901365
	4.94965	-10.7873	-11.6646	12.4757				4.94965	5.12476	7.53891	-11.6391				-5.60216	1.52795	-5.44792	9.26974				-5.60216	2.21766	6.69041	-1.46319
	2.33987	-9.16347	-9.22309	12.1597				2.33987	5.00994	7.22948	-11.7135				-3.88773	2.28512	-5.65336	10.2001				-3.88773	1.43145	6.82313	-2.02348
	5.66605	-6.58349	-6.29749	10.7673				5.66605	5.40149	7.46412	-11.3944				-4.172	2.71061	-5.92108	10.849				-4.172	0.743086	6.86306	-2.42511
	3.94115	-3.65229	-3.13574	9.36033				3.94115	5.79777	7.70462	-11.0694				-2.31939	1.98533	-6.40083	10.5135				-2.31939	0.401625	6.55582	-2.32191
	3.48315	-0.428421	0.2133	7.97274				3.48315	6.18925	7.9453	-10.7463				-1.50781	1.25063	-6.89113	10.1676				-1.50781	0.0383556	6.23249	-2.21486
	3.08046	-2.07421	-2.20665	7.45579				3.08046	6.30674	8.09483	-10.7499				-1.00533	0.524552	-7.38012	9.81949				-1.00533	-0.33835	5.90057	-2.10646
	4.6993	-4.4159	-5.47529	7.0487				4.6993	6.38869	8.23546	-10.8009				0.00605841	1.02249	-6.77136	9.66049				0.00605841	-0.115249	5.70788	-1.62813
	6.18991	-6.67818	-8.67998	6.64198				6.18991	6.47098	8.37616	-10.8522				0.953723	1.80338	-5.89406	9.53276				0.953723	0.223435	5.53508	-1.06705
	5.15959	-7.64733	-9.76111	6.77545				5.15959	6.5474	8.49527	-11.0737				0.996958	2.62604	-4.96963	9.40508				0.996958	0.556226	5.36048	-0.506718
	3.59774	-7.35758	-8.69983	7.48309				3.59774	6.62118	8.59736	-11.4846				1.19287	2.11747	-5.25583	9.21611				1.19287	0.743499	5.265	-0.162643
	6.437	-7.0653	-7.63722	8.19238				6.437	6.69569	8.70038	-11.8977				1.79734	0.0652825	-6.91165	8.9446				1.79734	0.771899	5.26113	-0.05836
	3.83741	-6.76601	-6.67733	8.79137				3.83741	6.74198	8.77854	-12.3189				2.06249	-1.83011	-8.37849	8.67326				2.06249	0.800107	5.25775	0.0461263
	4.84131	-6.35389	-6.40878	8.54451				4.84131	6.54135	8.64784	-12.8924				4.16016	-3.30537	-9.44461	8.45925				4.16016	0.850483	5.27658	0.141812
	4.6521	-5.94036	-6.13795	8.2981				4.6521	6.33575	8.51803	-13.4678				1.24581	-1.57539	-7.90646	8.95085				1.24581	1.21321	5.59029	0.141813
	7.50641	-5.5329	-5.86972	8.05656				7.50641	6.12875	8.3914	-14.0349				2.42321	0.289352	-6.3101	9.42216				2.42321	1.56774	5.89517	0.141813
	11.0231	-5.99415	-6.44785	8.2061				11.0231	5.96858	8.19895	-14.5377				2.41882	2.23078	-4.70253	9.86231				2.41882	1.9058	6.18421	0.141817
	8.63194	-6.77615	-7.34425	8.50893				8.63194	5.82751	7.98287	-15.0097				0.899223	1.98747	-4.84134	9.78106				0.899223	2.19791	6.23118	0.203715
	9.02229	-7.51854	-8.20647	8.80487				9.02229	5.68766	7.77323	-15.4693				-0.386854	0.743849	-5.77149	9.46441				-0.386854	2.46813	6.17232	0.297357
	12.5864	-8.01645	-8.86604	9.07502				12.5864	5.7923	7.75993	-15.9448				-1.30933	-0.426753	-6.6511	9.1527				-1.30933	2.73138	6.11865	0.393145
	15.3505	-8.03688	-9.10964	9.27774				15.3505	6.37894	8.13215	-16.4252				-0.691012	-0.869427	-6.88108	8.85783				-0.691012	2.84975	6.07022	0.41308
	13.4259	-8.0517	-9.34614	9.47469				13.4259	6.95984	8.4989	-16.8934				-1.94664	0.365898	-5.5807	8.62401				-1.94664	2.63207	6.02922	0.250717
	13.9791	-8.06159	-9.5881	9.6763				13.9791	7.56597	8.87967	-17.3742				-2.30028	1.68037	-4.18435	8.39665				-2.30028	2.42036	5.98919	0.0927655
	16.0977	-8.84974	-10.9369	10.3683				16.0977	7.81848	9.09406	-18.0059				-2.07297	3.14119	-2.62258	8.16323				-2.07297	2.20301	5.94794	-0.0694327
	18.6225	-9.55349	-12.2677	11.0657				18.6225	8.05476	9.30001	-18.6338				-1.72182	2.94391	-2.97011	8.30708				-1.72182	2.30227	6.04544	-0.0800553
	14.6534	-10.1704	-13.6055	11.7847				14.6534	8.29963	9.51388	-19.2836				-1.74057	2.64285	-3.43744	8.47317				-1.74057	2.41982	6.14906	-0.0800573
	18.1429	-10.9412	-14.9702	12.5354				18.1429	8.47358	9.66291	-19.7492				-2.71934	2.34396	-3.90854	8.64317				-2.71934	2.53916	6.25406	-0.0800671
	18.3718	-11.7748	-16.309	13.2928				18.3718	8.59392	9.76303	-20.0755				-3.14872	2.70223	-3.92552	9.10294				-3.14872	2.82134	6.2547	0.110993
	16.9921	-12.5208	-17.6521	14.0759				16.9921	8.71782	9.86639	-20.4118				-4.092	3.56246	-3.59936	9.77405				-4.092	3.22488	6.17466	0.448696
	5.50622	-9.94776	-21.977	9.94255				5.50622	1.87137	9.39495	-17.2582				-4.22054	4.44136	-3.27736	10.4514				-4.22054	3.63585	6.09342	0.794916
	6.48601	-6.96025	-15.8747	7.71757				6.48601	1.62466	9.38238	-16.9932				-4.64855	5.02411	-3.15544	11.0173				-4.64855	4.07789	6.04803	1.09898
	6.99938	-2.42197	-9.16685	5.51852				6.99938	1.37397	9.37061	-16.7211				-4.58472	4.24775	-3.88803	11.0961				-4.58472	4.65976	6.17438	1.20684
	9.17407	3.41332	-1.77924	3.38989				9.17407	1.12477	9.35989	-16.4479				-5.13293	3.51743	-4.56514	11.1724				-5.13293	5.22405	6.31116	1.32533
	7.56019	5.67525	0.50578	2.30537				7.56019	1.3078	9.80484	-16.1182				-4.58209	2.79822	-5.2188	11.2499				-4.58209	5.79819	6.46512	1.46016
	10.4072	5.65077	-0.172131	1.71273				10.4072	1.73162	10.5158	-15.7413				-5.56551	3.05053	-4.96475	11.3756				-5.56551	6.1743	6.68858	1.50025
	10.905	5.62676	-0.846958	1.11891				10.905	2.15458	11.2268	-15.3617				-6.5135	3.53321	-4.51511	11.5				-6.5135	6.48864	6.91832	1.51518
	6.17949	5.51839	-1.21218	0.935904				6.17949	2.56507	11.8486	-15.0415				-7.49754	4.0343	-4.06805	11.6159				-7.49754	6.80423	7.15002	1.5312
	10.0837	5.16026	-0.744103	1.89199				10.0837	2.98197	12.2797	-14.8642				-9.40132	4.97237	-3.42137	11.8773				-9.40132	7.29703	7.35964	1.73504
	6.01178	4.79983	-0.266364	2.84865				6.01178	3.39979	12.712	-14.6861				-9.03665	6.49057	-2.49454	12.3343				-9.03665	8.01873	7.5375	2.18275
	5.85897	4.44789	0.206162	3.77689				5.85897	3.80612	13.1329	-14.5124				-9.69544	8.08131	-1.52629	12.7961				-9.69544	8.75335	7.71671	2.64066
	4.27026	1.1079	-2.06159	7.33072				4.27026	6.5783	15.7164	-14.4604				-12.8169	9.60425	-0.588466	13.2084				-12.8169	9.4554	7.8835	3.08043
	1.44885	1.02504	-2.38215	7.40733				1.44885	5.98647	15.2721	-14.4604				-11.9228	9.04247	-0.6462	12.7268				-11.9228	9.57223	7.854	3.15605
	2.48706	0.947866	-2.69501	7.48096				2.48706	5.41017	14.8385	-14.4604				-12.3567	8.46837	-0.706325	12.2301				-12.3567	9.69151	7.82485	3.23526
	2.97468	0.873137	-3.0135	7.55477				2.97468	4.82488	14.3971	-14.4604				-12.7163	7.89446	-0.767584	11.7292				-12.7163	9.81061	7.79669	3.31637
	1.26175	-1.44061	-6.04764	7.90593				1.26175	4.92968	13.2047	-13.7281				-14.4994	8.06637	-0.398994	11.4392				-14.4994	9.94004	7.80879	3.36559
	1.62369	-4.36497	-9.86051	8.35106				1.62369	5.22822	11.7612	-12.8433				-12.9044	8.63908	0.221981	11.2472				-12.9044	10.0794	7.84393	3.40205
	2.55835	-7.05099	-13.4444	8.78476				2.55835	5.4819	10.3572	-12.0815				-14.7453	9.22952	0.866324	11.0551				-14.7453	10.2187	7.88201	3.44136
	1.4278	-8.35352	-14.9836	9.16709				1.4278	6.06472	9.8181	-11.4487				-12.0442	9.83608	1.46238	10.9429				-12.0442	10.3205	7.95533	3.42915
	2.58759	-7.36986	-13.0056	9.44288				2.58759	7.24211	10.8241	-10.9309				-11.8735	10.5087	1.94154	11.0301				-11.8735	10.3313	8.12089	3.27372
	-0.334782	-6.36281	-11.0586	9.7112				-0.334782	8.38298	11.8113	-10.425				-13.0041	11.1897	2.42863	11.1172				-13.0041	10.3381	8.28513	3.11819
	2.76484	-5.28832	-9.05218	9.98399				2.76484	9.5379	12.8236	-9.90832				-15.1212	11.8585	2.90879	11.2017				-15.1212	10.341	8.4432	2.96716
	0.944309	-6.02945	-9.34841	10.2333				0.944309	9.1714	12.5146	-9.90423				-14.31	12.3777	3.50527	11.0108				-14.31	10.4207	8.27937	3.13282
	1.52757	-6.78058	-9.65178	10.4695				1.52757	8.80118	12.2019	-9.90422				-13.1813	12.8877	4.12671	10.7861				-13.1813	10.5019	8.06735	3.34529
	2.04055	-7.55897	-9.95688	10.7027				2.04055	8.42359	11.8828	-9.90422				-12.8545	13.3972	4.74606	10.5668				-12.8545	10.5729	7.85205	3.5603
	1.0835	-7.39437	-9.68043	10.8422				1.0835	8.3202	11.8325	-9.84641				-11.4328	13.4209	4.90199	10.4567				-11.4328	10.3483	7.83167	3.35183
	-0.426895	-6.6612	-9.05558	10.9225				-0.426895	8.38622	11.9471	-9.75476				-13.5085	12.9634	4.58561	10.4504				-13.5085	9.84278	8.01007	2.72912
	-0.12458	-5.91551	-8.40883	11.0026				-0.12458	8.45402	12.0651	-9.66037				-13.214	12.5197	4.26787	10.4376				-13.214	9.34511	8.18676	2.12135
	-1.50484	-5.20869	-7.83518	10.9904				-1.50484	8.28692	12.2672	-9.44247				-12.3402	12.1042	3.8473	10.5455				-12.3402	8.88991	8.33342	1.58294
	0.55794	-4.61583	-7.51151	10.6932				0.55794	7.37961	12.737	-8.8444				-13.6635	11.9407	2.89218	11.4718				-13.6635	8.80979	8.24386	1.58295
	-5.12226	-4.00993	-7.1741	10.3847				-5.12226	6.44045	13.2297	-8.2371				-13.5449	11.8169	1.99597	12.3776				-13.5449	8.73071	8.15563	1.58293
	-9.56847	-3.40549	-6.83063	10.0721				-9.56847	5.49167	13.7323	-7.63572				-11.9337	11.7263	1.11616	13.3071				-11.9337	8.64885	8.06443	1.58294
	-9.93508	-0.615937	-3.3232	9.88844				-9.93508	5.71244	14.6964	-7.19353				-12.8066	12.4544	1.86391	13.1375				-12.8066	8.75431	8.02902	1.70564
	-9.35565	2.74227	1.00007	9.71577				-9.35565	6.14078	15.7697	-6.76368				-13.8607	13.4666	3.12932	12.6244				-13.8607	8.91582	8.01322	1.86708
	-9.22115	6.22306	5.53387	9.53732				-9.22115	6.57201	16.8448	-6.33393				-12.6686	14.5579	4.45701	12.0968				-12.6686	9.08016	7.99856	2.03536
	-12.963	2.38356	2.64148	10.6282				-12.963	8.7052	17.1851	-4.68747				-13.2402	15.8894	5.84636	11.7229				-13.2402	9.17555	7.96171	2.15976
	-11.2688	2.29852	2.40515	10.1837				-11.2688	7.90542	16.502	-4.68748				-13.1816	17.5317	7.27776	11.6073				-13.1816	9.15789	7.88767	2.20606
	-12.1378	2.2111	2.16328	9.73106				-12.1378	7.09035	15.8047	-4.68747				-14.4002	19.2591	8.77469	11.4846				-14.4002	9.13909	7.81114	2.2536
	-11.2841	3.00907	2.46535	9.1688				-11.2841	6.87381	15.9117	-4.53066				-14.6374	21.0205	10.2931	11.3571				-14.6374	9.11907	7.73442	2.30044
	-8.94508	4.40584	3.18028	8.51564				-8.94508	7.0989	16.6028	-4.26452				-15.216	19.6857	9.24239	11.2064				-15.216	8.97985	7.81488	2.1166
	-14.5697	5.80217	3.94636	7.81374				-14.5697	7.33128	17.3129	-3.99294				-15.4659	18.3343	8.19153	11.052				-15.4659	8.83679	7.89882	1.92918
	-7.0238	1.1261	5.06485	13.8649				-7.0238	13.8064	15.5418	-4.74504				-15.4799	16.9999	7.16736	10.8977				-15.4799	8.69327	7.98427	1.74266
	-8.25919	0.302868	3.64003	13.9485				-8.25919	14.3387	16.5133	-4.27425				-15.6993	16.5074	6.94124	10.6446				-15.6993	8.51271	7.97781	1.58791
	-10.3748	-0.479321	2.23158	14.0279				-10.3748	14.8722	17.4869	-3.80247				-14.3328	16.511	7.18855	10.3212				-14.3328	8.30249	7.91339	1.44654
	-10.7845	-1.20511	0.819691	13.9689				-10.7845	14.5308	17.7056	-3.78124				-15.0503	16.5175	7.43803	9.99665				-15.0503	8.09115	7.84825	1.30454
	-8.91696	-1.91748	-0.667868	13.7659				-8.91696	13.2501	17.1696	-4.23671				-27.3988	8.18784	2.77045	7.88351				-27.3988	11.6402	6.59805	5.60074
	-11.068	-2.59829	-2.1433	13.558				-11.068	11.9253	16.6379	-4.71859				-25.1347	7.63662	2.05587	8.14535				-25.1347	11.4968	6.88779	5.22298
	-11.3897	-3.14231	-3.44738	13.2954				-11.3897	10.6	16.1285	-5.11099				-23.0497	7.11509	1.37867	8.40069				-23.0497	11.349	7.16504	4.85395
	-10.1481	-2.91918	-3.72101	12.5432				-10.1481	9.2953	15.6517	-4.63162				-26.5976	7.86779	1.6493	8.84791				-26.5976	11.3706	7.36318	4.71159
	-11.7355	-2.69306	-3.99337	11.7914				-11.7355	7.9941	15.1823	-4.15199				-27.0916	11.4464	4.04353	9.69247				-27.0916	11.779	7.38748	5.07657
	-11.1222	-2.47077	-4.25622	11.0625				-11.1222	6.73509	14.7333	-3.68647				-27.0304	15.0577	6.50161	10.5135				-27.0304	12.1775	7.41152	5.43318
	-11.578	-3.34496	-5.97491	10.317				-11.578	6.21697	14.7566	-3.15441				-25.829	18.8608	9.13201	11.351				-25.829	12.5856	7.43647	5.79879
	-10.8401	-4.62505	-8.22525	9.57654				-10.8401	5.99077	14.9614	-2.599				-25.1501	18.5418	9.133	11.1248				-25.1501	13.2814	7.44691	6.43677
	-9.44756	-5.86338	-10.4079	8.85862				-9.44756	5.7716	15.1618	-2.0539				-26.5895	17.9728	8.95783	10.8308				-26.5895	13.978	7.45625	7.07562
	-10.7883	-6.03032	-11.1153	8.31473				-10.7883	5.41655	15.2984	-1.70111				-27.877	17.3901	8.76762	10.5216				-27.877	14.6909	7.46587	7.72924
	-8.11933	-4.14516	-8.95959	8.11697				-8.11933	4.81117	15.3071	-1.74154				-27.7813	17.602	8.93302	10.5325				-27.7813	15.4055	7.69058	8.22846
	-10.1854	-2.28059	-6.80474	7.91959				-10.1854	4.21383	15.3158	-1.78893				-28.7063	18.4135	9.35493	10.779				-28.7063	16.1003	8.07483	8.60344
	-10.9092	-0.34484	-4.54058	7.71296				-10.9092	3.59544	15.3249	-1.84566				-28.6469	19.2457	9.7662	11.0166				-28.6469	16.8028	8.4695	8.99089
	-16.0808	6.80561	4.45499	6.84588				-16.0808	4.24535	18.5788	-0.847073				-35.9037	34.3841	23.4032	13.412				-35.9037	23.9028	7.26867	17.8369
	-17.3229	5.84941	3.20326	7.0548				-17.3229	3.83973	18.6936	-0.945508				-34.4986	31.7917	21.0136	13.0973				-34.4986	23.8007	7.22245	17.8949
	-15.9553	4.8963	1.9432	7.26906				-15.9553	3.42074	18.8106	-1.05278				-37.0322	29.2268	18.6753	12.782				-37.0322	23.6978	7.17646	17.9539
	-16.0116	3.96799	0.702474	7.48404				-16.0116	2.99738	18.9271	-1.16681				-33.8859	26.1078	15.9553	12.3319				-33.8859	23.4998	7.1563	17.8627
	-18.7031	4.71366	1.76238	7.77029				-18.7031	3.02498	19.3849	-1.33459				-35.5778	21.468	12.1053	11.4915				-35.5778	23.035	7.20997	17.3401
	-19.264	5.79444	3.31318	8.07951				-19.264	3.14253	19.9226	-1.52289				-36.1768	16.8524	8.23591	10.6049				-36.1768	22.557	7.26464	16.8043
	-17.9289	6.86513	4.88139	8.38974				-17.9289	3.26125	20.4608	-1.71782				-33.2011	12.405	4.46059	9.69351				-33.2011	22.0774	7.31902	16.2678
	-20.5601	7.85099	6.23898	8.48838				-20.5601	3.49036	20.6391	-1.88306				-35.7683	13.9233	6.07243	9.53434				-35.7683	22.1898	7.36813	16.3197
	-19.917	8.80514	7.41799	8.33171				-19.917	3.86617	20.3861	-2.01902				-34.0009	16.4202	8.61703	9.47779				-34.0009	22.3908	7.41771	16.4578
	-19.9287	9.76057	8.61335	8.17356				-19.9287	4.23943	20.1325	-2.15926				-32.7943	19.0087	11.2798	9.4176				-32.7943	22.5917	7.46712	16.5957
	4.95325	-9.20333	-10.0374	12.3182				4.95325	12.2292	11.9312	-10.2003				-30.0504	20.1462	12.4747	9.41779				-30.0504	23.0298	7.56955	16.9514
	1.83843	-7.20405	-8.11058	11.1097				1.83843	12.2483	12.5124	-9.81286				-33.6821	19.7402	12.0895	9.47589				-33.6821	23.7364	7.73302	17.5517
	-0.883712	-5.0786	-6.09478	9.90967				-0.883712	12.2675	13.0961	-9.42524				-34.7168	19.3348	11.7008	9.52256				-34.7168	24.4441	7.89764	18.1533
	2.56786	-3.63379	-4.86407	9.04799				2.56786	11.9596	13.3666	-9.10612				-35.2614	18.9339	11.3099	9.55335				-35.2614	25.1497	8.05421	18.763
	0.98326	-4.19906	-5.88433	9.00932				0.98326	10.7285	12.8063	-8.94763				-35.5248	18.4745	10.8343	9.54611				-35.5248	25.9959	8.16796	19.5782
	-3.65079	-4.74741	-6.89823	8.96923				-3.65079	9.49302	12.2537	-8.79296				-36.6272	18.0189	10.3586	9.53746				-36.6272	26.8394	8.28333	20.392
	-2.00661	-5.26628	-7.88219	8.9287				-2.00661	8.283	11.7215	-8.64571				-36.6061	17.5752	9.8914	9.52761				-36.6061	27.665	8.3982	21.1895
	-4.1612	-4.02483	-7.14419	8.29076				-4.1612	7.35631	11.2536	-8.6339				-35.8892	18.3438	10.52	9.6971				-35.8892	28.282	8.51909	21.8164
	-0.118267	-2.54623	-6.14238	7.56465				-0.118267	6.46852	10.7981	-8.64246				-36.5886	19.591	11.5811	9.93517				-36.5886	28.8116	8.6431	22.372
	-3.45604	-1.09618	-5.12701	6.84525				-3.45604	5.59735	10.3555	-8.65308				-37.66	20.8159	12.6221	10.1662				-37.66	29.327	8.76644	22.9145
	-2.58189	-0.43585	-4.88707	6.317				-2.58189	4.87594	10.0432	-8.50752				-37.9931	21.8823	13.4321	10.4662				-37.9931	29.9469	8.99255	23.4799
	-3.5119	-0.574219	-5.44943	5.99417				-3.5119	4.32051	9.8658	-8.20667				-37.9941	22.564	13.7347	10.8858				-37.9941	30.7343	9.40389	24.0568
	0.0139046	-0.708152	-5.9992	5.67764				0.0139046	3.78015	9.69435	-7.91124				-37.8205	23.2277	14.0299	11.295				-37.8205	31.4982	9.80633	24.62
	-0.560341	-0.900185	-6.61031	5.39408				-0.560341	3.27964	9.57985	-7.65371				-40.1617	23.9087	14.3336	11.7154				-40.1617	32.279	10.2211	25.1993
	-2.11533	-1.45862	-7.54375	5.38034				-2.11533	3.10428	9.85561	-7.70128				-38.7349	26.4565	16.0851	12.645				-38.7349	33.2938	10.5504	26.0637
	-2.43769	-1.99347	-8.45283	5.36642				-2.43769	2.93026	10.1262	-7.75239				-39.4598	29.0187	17.8619	13.5698				-39.4598	34.2916	10.871	26.9173
	-3.16912	-2.52738	-9.37653	5.35176				-3.16912	2.75013	10.403	-7.80922				-39.3187	31.6478	19.6959	14.5159				-39.3187	35.3123	11.2017	27.7909
	-1.29967	-2.5802	-9.85842	5.31828				-1.29967	2.60752	10.4221	-7.98284				-39.931	34.2315	21.6986	15.2249				-39.931	36.0338	11.4385	28.4109
	-0.407634	-2.47659	-10.1952	5.27533				-0.407634	2.47756	10.3576	-8.19272				-41.8469	36.7331	23.769	15.7495				-41.8469	36.5334	11.6048	28.8423
	-1.43457	-2.37112	-10.5278	5.22881				-1.43457	2.34821	10.2938	-8.4005				-42.9123	39.3068	25.8964	16.2796				-42.9123	37.0447	11.7757	29.284
	-5.39531	-2.39413	-10.7374	5.12425				-5.39531	2.13745	10.1797	-8.73106				-42.8211	41.3272	26.2898	18.7825				-42.8211	35.141	7.67323	27.9207
	-3.37327	-2.63883	-10.7319	4.92887				-3.37327	1.79205	9.98379	-9.26094				-42.3817	31.9889	17.6432	16.9284				-42.3817	34.8649	7.48951	27.717
	-1.91672	-2.87724	-10.7265	4.73681				-1.91672	1.44952	9.79303	-9.77959				-42.6774	22.7649	9.09783	14.9723				-42.6774	34.5822	7.30416	27.5095
	-1.35904	-3.12201	-10.721	4.53791				-1.35904	1.09156	9.59734	-10.3146				-41.5079	14.1042	0.99891	12.9606				-41.5079	34.2989	7.12132	27.3027
	0.325931	-3.40674	-11.094	4.39991				0.325931	1.70647	9.68052	-10.3556				-41.4645	11.5096	-1.69008	12.3208				-41.4645	34.2074	7.07137	27.1039
	-1.61281	-3.68491	-11.4577	4.26622				-1.61281	2.30572	9.7638	-10.396				-41.593	11.805	-1.79024	12.4052				-41.593	34.2145	7.09254	26.902
	0.751379	-3.97168	-11.8307	4.12923				0.751379	2.9183	9.8507	-10.4397				-42.5724	12.0998	-1.89541	12.4795				-42.5724	34.2202	7.11655	26.7022
	-0.829294	-4.83948	-12.9534	4.01178				-0.829294	2.75253	9.53297	-10.9309				-42.0382	12.3294	-1.81761	12.5397				-42.0382	34.228	7.15795	26.5275
	1.88084	-6.02972	-14.488	3.90851				1.88084	2.11379	8.97973	-11.679				-42.2528	12.4004	-1.21999	12.576				-42.2528	34.245	7.24491	26.4017
	1.31943	-7.2424	-16.0467	3.80235				1.31943	1.44603	8.41383	-12.4468				-42.2835	12.4741	-0.64399	12.5883				-42.2835	34.2606	7.33117	26.276
	6.14549	-8.20636	-17.1182	3.78594				6.14549	0.85786	7.9349	-13.0274				-42.2407	12.5483	-0.106194	12.5773				-42.2407	34.2743	7.41416	26.154
	7.65087	-8.40327	-16.7067	4.04222				7.65087	0.56468	7.73115	-13.0167				-41.9281	17.6857	4.48592	14.5407				-41.9281	35.5323	8.23445	26.3726
	8.08287	-8.60391	-16.2852	4.29978				8.08287	0.26494	7.52275	-13.0059				-43.7418	18.2957	4.7283	14.9248				-43.7418	35.3476	8.05921	26.3726
	8.61698	-8.80346	-15.8638	4.55232				8.61698	-0.034193	7.31469	-12.995				-43.1782	19.5015	5.21084	15.6846				-43.1782	34.9742	7.70684	26.3726
	11.3803	-8.25126	-15.3839	4.25018				11.3803	-0.748601	6.943	-14.1547				-43.6918	22.2472	8.198	15.7635				-43.6918	32.8847	7.58818	24.8382
	12.6636	-7.55555	-14.8729	3.84918				12.6636	-1.59146	6.53551	-15.5615				-43.0109	25.8861	12.2639	15.7338				-43.0109	30.1404	7.49547	22.7343
	13.5586	-6.85397	-14.3531	3.44795				13.5586	-2.48206	6.12974	-16.9968				-42.8409	29.6044	16.373	15.6998				-42.8409	27.4527	7.41058	20.6334
	15.0714	-6.13037	-13.9487	3.17774				15.0714	-2.44972	6.29053	-17.5438				-41.1918	31.4156	18.4219	15.6291				-41.1918	25.5893	7.46663	19.0102
	16.9952	-5.36403	-13.6579	3.03411				16.9952	-1.3571	7.08446	-17.1093				-44.097	29.5796	16.5945	15.502				-44.097	25.2626	7.75554	18.3615
	16.5339	-4.60891	-13.3622	2.88166				16.5339	-0.267616	7.88211	-16.6761				-43.769	27.8046	14.8429	15.3752				-43.769	24.9303	8.0305	17.7278
	16.6149	-4.05909	-13.2581	2.78732				16.6149	0.763924	8.63734	-16.2936				-41.3005	26.0129	13.0915	15.2433				-41.3005	24.5776	8.30361	17.0809
	14.9793	-5.28647	-15.1044	3.34791				14.9793	1.5183	9.12894	-16.3115				-42.7469	26.1298	13.7438	14.731				-42.7469	24.4535	8.17121	17.0758
	15.6987	-6.40818	-16.9102	3.9124				15.6987	2.27502	9.62152	-16.3294				-40.7478	26.2697	14.3983	14.2223				-40.7478	24.3324	8.03732	17.0758
	16.6301	-7.40318	-18.6485	4.47071				16.6301	3.02036	10.1062	-16.347				-44.294	26.4234	15.0639	13.6986				-44.294	24.2072	7.8994	17.0758
	14.5778	-7.13076	-18.0471	4.90807				14.5778	3.74448	10.5567	-15.9883				-41.6161	26.3279	14.8803	13.7888				-41.6161	24.1326	7.84453	17.0348
	14.1121	-6.34904	-16.4825	5.29051				14.1121	4.44271	10.9887	-15.4798				-41.6272	26.0863	14.1888	14.2528				-41.6272	24.0912	7.84223	16.97
	9.81464	-5.5736	-14.9557	5.66405				9.81464	5.11232	11.4101	-14.9889				-43.0604	25.8482	13.4821	14.7302				-43.0604	24.0486	7.83998	16.9034
	15.2817	-5.42964	-14.3201	5.99623				15.2817	5.36036	11.5236	-14.4652				-43.7235	25.5839	12.7927	15.1528				-43.7235	24.0889	7.71181	16.943
	8.68648	-6.62983	-15.5681	6.2181				8.68648	4.74435	10.9924	-13.9				-43.1014	25.2175	12.1565	15.3915				-43.1014	24.3843	7.21791	17.3219
	10.7818	-7.79878	-16.7669	6.43				10.7818	4.15626	10.4785	-13.3526				-43.2429	24.8488	11.5005	15.6329				-43.2429	24.6792	6.75854	17.7214
	12.8501	-8.99889	-17.9817	6.64314				12.8501	3.56458	9.95463	-12.7939				-42.7043	21.6473	7.36149	16.2825				-42.7043	25.2759	6.37651	18.2944
	8.32476	-7.27471	-14.8901	6.65342				8.32476	3.87736	10.0239	-12.4095				-44.2212	18.513	3.4976	16.7343				-44.2212	25.5987	6.48223	18.423
	11.6638	-5.29288	-11.6108	6.65217				11.6638	4.22095	10.1203	-12.0467				-43.1318	15.6286	-0.118392	17.1839				-43.1318	25.9198	6.59433	18.5564
	7.71	-3.10351	-8.17948	6.64934				7.71	4.56715	10.2192	-11.679				-40.6346	16.2605	3.3676	14.8726				-40.6346	22.8426	6.91833	15.4905
	8.5045	-2.80319	-7.3009	6.71925				8.5045	4.52971	9.84537	-11.664				-42.5956	15.8259	3.30543	14.438				-42.5956	22.5702	6.65508	15.4905
	7.70133	-3.96075	-8.31441	6.83599				7.70133	4.22119	9.14103	-11.9009				-42.0554	15.3809	3.23967	13.9912				-42.0554	22.2847	6.38023	15.4905
	9.30437	-5.15723	-9.33725	6.94944				9.30437	3.90701	8.42091	-12.1432				-42.0062	15.0949	2.468	14.3146				-42.0062	22.3195	6.30199	15.589
	7.63746	-6.35835	-10.5817	7.01066				7.63746	3.76081	7.95245	-12.1448				-42.179	14.964	1.18826	15.1776				-42.179	22.5902	6.37469	15.7589
	6.7343	-7.46813	-12.7111	6.88339				6.7343	4.26514	8.48364	-11.1987				-43.7651	14.8705	-0.141885	16.0418				-43.7651	22.8675	6.45263	15.9358
	8.57247	-8.53051	-14.8741	6.7479				8.57247	4.76717	9.02951	-10.2283				-37.2667	15.1876	4.21971	13.3386				-37.2667	16.2434	8.62454	8.71572
	9.15367	-9.51516	-17.023	6.60719				9.15367	5.25509	9.57703	-9.25594				-36.7343	16.7965	5.23394	13.9038				-36.7343	16.3851	8.6978	8.66453
	9.17498	-9.86248	-17.1159	6.62775				9.17498	4.68258	9.0238	-8.8513				-37.6384	18.418	6.27546	14.4694				-37.6384	16.5238	8.77076	8.61982
	9.10537	-10.0705	-16.766	6.67908				9.10537	3.90926	8.25038	-8.57998				-37.4833	19.8941	7.28671	14.9314				-37.4833	17.2146	8.63068	9.28335
	8.97053	-10.2792	-16.4078	6.72708				8.97053	3.1302	7.46211	-8.30345				-37.3763	21.294	8.31671	15.309				-37.3763	18.4891	8.26768	10.6884
	8.91311	-10.1178	-15.7749	6.57191				8.91311	2.66394	6.91308	-8.43393				-39.5483	22.7036	9.37258	15.6841				-39.5483	19.7443	7.90503	12.0849
	8.82826	-9.48182	-14.8088	6.17546				8.82826	2.57982	6.66782	-9.05964				-36.4075	23.8972	10.2822	15.9969				-36.4075	20.792	7.53455	13.3044
	9.10484	-8.79639	-13.811	5.77281				9.10484	2.49244	6.41872	-9.69492				-36.3497	23.4962	9.98053	15.8746				-36.3497	20.5002	7.00987	13.4113
	11.5909	-8.08766	-12.8581	5.37438				11.5909	2.34207	6.15232	-10.2974				-36.0599	23.0954	9.66479	15.7403				-36.0599	20.1909	6.49837	13.5254
	9.23798	-7.57813	-12.75	5.02876				9.23798	1.33669	5.64204	-10.455				-35.8558	22.7067	9.34496	15.5985				-35.8558	19.8742	6.01491	13.6432
	9.98968	-7.05936	-12.6357	4.67284				9.98968	0.30178	5.12333	-10.6208				-35.54	23.4857	10.3837	15.315				-35.54	19.5101	5.78105	13.5227
	10.1349	-6.54384	-12.5176	4.31501				10.1349	-0.738044	4.60852	-10.7912				-35.4349	24.7379	11.9825	14.9741				-35.4349	19.1348	5.65078	13.3144
	8.52519	-5.63821	-11.5476	4.40005				8.52519	0.132109	5.64799	-10.55				-36.1686	25.9924	13.5866	14.6324				-36.1686	18.7678	5.53265	13.1164
	7.28251	-4.52355	-10.1417	4.69656				7.28251	1.93679	7.45665	-10.1047				-35.15	26.1686	13.8149	14.5286				-35.15	18.675	5.41064	13.1856
	5.24687	-3.41239	-8.72571	4.99389				5.24687	3.75366	9.27663	-9.65658				-33.2687	24.2773	11.3739	14.8957				-33.2687	19.1079	5.27616	13.7525
	2.84162	-2.53052	-7.5397	5.52003				2.84162	5.04269	10.6458	-9.332				-32.9618	22.5024	9.03873	15.252				-32.9618	19.5267	5.14997	14.3051
	2.74366	-2.11552	-6.82039	6.65679				2.74366	5.15327	11.0302	-9.28213				-34.1886	20.76	6.70024	15.6146				-34.1886	19.9518	5.02594	14.8704
	1.70216	-1.70408	-6.10103	7.80988				1.70216	5.2643	11.4142	-9.23357				-36.0719	14.1314	-1.29923	16.034				-36.0719	21.6818	5.61012	16.3397
	0.971478	-1.30566	-5.39906	8.95231				0.971478	5.37306	11.7886	-9.18744				-32.8915	15.2106	-0.26924	16.2256				-32.8915	22.0916	5.57906	16.8301
	-2.27633	-3.29797	-8.14831	10.0238				-2.27633	6.98641	13.4893	-9.14487				-32.9331	16.3332	0.803253	16.4209				-32.9331	22.5087	5.55105	17.3303
	-4.80711	-5.25784	-11.1173	11.0999				-4.80711	8.78447	15.3343	-9.10483				-34.0589	17.4746	1.89467	16.6156				-34.0589	22.9239	5.5268	17.8293
	-3.92186	-6.87338	-13.9011	12.167				-3.92186	10.5745	17.1474	-9.06788				-37.4519	17.2839	1.21896	17.0913				-37.4519	23.526	5.64041	18.3271
	-19.8647	2.10427	6.95283	15.5164				-19.8647	14.4112	20.5382	-0.839071				-34.3862	16.8501	0.204955	17.6354				-34.3862	24.1818	5.7832	18.8377
	-17.8597	1.15381	5.38092	15.3003				-17.8597	14.0365	20.0091	-1.55103				-35.9374	16.4418	-0.778719	18.1795				-35.9374	24.8372	5.92546	19.3465
	-17.1083	0.225528	3.82226	15.0823				-17.1083	13.6539	19.4796	-2.26095				-35.1732	15.968	-1.71308	18.562				-35.1732	25.1083	6.00003	19.4715
	-16.981	-0.653943	2.32211	14.869				-16.981	13.2748	18.9652	-2.94801				-35.3148	15.3761	-2.66124	18.7693				-35.3148	24.9249	6.00304	19.1367
	-16.103	0.0244415	2.92737	14.3663				-16.103	12.5488	18.4028	-3.46944				-36.3595	14.8056	-3.59012	18.975				-36.3595	24.7405	6.01471	18.8034
	-16.2223	1.37651	4.41884	13.7534				-16.2223	11.6767	17.8278	-3.92236				-44.1978	27.5815	16.7045	13.1582				-44.1978	21.4234	9.57946	14.1318
	-16.1067	2.74952	5.91219	13.1585				-16.1067	10.8103	17.2679	-4.36942				-42.9623	24.3664	13.7993	12.8153				-42.9623	21.6321	9.42453	14.1953
	-14.6066	2.91891	5.76654	12.5857				-14.6066	10.1142	16.7842	-4.8068				-42.6646	21.2313	10.9034	12.4455				-42.6646	21.8407	9.27738	14.2634
	-14.6229	0.622341	2.32027	12.08				-14.6229	9.81707	16.4748	-5.19508				-41.9146	19.326	9.06147	12.2334				-41.9146	22.0131	9.04055	14.4006
	-13.5372	-1.54309	-0.967212	11.5871				-13.5372	9.52398	16.1729	-5.57375				-39.0804	20.3981	9.89928	12.4942				-39.0804	22.0932	8.52149	14.7286
	-11.3051	-3.68402	-4.26279	11.0831				-11.3051	9.22058	15.8638	-5.96129				-40.4438	21.4759	10.7488	12.7548				-40.4438	22.158	8.00598	15.0574
	-9.75264	-3.00244	-4.03309	10.5629				-9.75264	8.15575	15.599	-6.76688				-41.0013	22.5333	11.5892	13.0088				-41.0013	22.2067	7.50631	15.379
	-9.57789	-2.21979	-3.65106	10.0498				-9.57789	7.03922	15.3435	-7.60332				-40.8619	21.6054	10.2038	13.3329				-40.8619	22.2911	7.15177	15.6868
	-7.32673	-1.41887	-3.24924	9.51955				-7.32673	5.84645	15.0827	-8.49587				-37.2651	20.4502	8.51117	13.6496				-37.2651	22.3739	6.81735	15.9912
	-6.59261	-0.992514	-3.40751	9.04977				-6.59261	4.86085	15.0544	-9.20121				-38.3513	19.3617	6.84784	13.9429				-38.3513	22.4475	6.48979	16.2885
	-6.6624	-0.83899	-3.96213	8.62799				-6.6624	4.047	15.1903	-9.76208				-38.1756	18.9838	6.09972	14.111				-38.1756	22.3373	6.17885	16.3885
	-7.88904	-0.682471	-4.52768	8.18843				-7.88904	3.18786	15.3295	-10.3632				-37.923	19.2881	6.27999	14.162				-37.923	22.0495	5.89321	16.2925
	-3.73585	-0.131273	-4.41521	7.77529				-3.73585	2.48161	15.5115	-10.9334				-37.1699	19.586	6.45662	14.209				-37.1699	21.7651	5.61764	16.2004
	-5.80185	1.96069	-1.67032	7.50688				-5.80185	2.4825	15.8499	-11.2697				-38.0415	19.9677	6.71792	14.2692				-38.0415	21.5749	5.37249	16.177
	-8.12236	4.18579	1.22637	7.23249				-8.12236	2.48176	16.1962	-11.6198				-37.3148	20.8603	7.51731	14.4284				-37.3148	22.0673	5.34687	16.6096
	-8.56219	6.49801	4.22162	6.95815				-8.56219	2.47922	16.5428	-11.9764				-38.9283	21.7412	8.30991	14.5844				-38.9283	22.5494	5.32369	17.0325
	-0.784832	-9.30153	-16.9727	8.43591				-0.784832	9.39662	14.4668	-8.28252				-36.1945	22.6477	9.12927	14.7438				-36.1945	23.0417	5.302	17.4636
	-2.41846	-11.0837	-17.8467	9.29679				-2.41846	9.16881	14.101	-7.69371				-36.8216	23.3632	9.44882	15.1536				-36.8216	23.3803	5.29987	17.7766
	0.568408	-12.8566	-18.6641	10.1082				0.568408	8.95061	13.7452	-7.12455				-36.2825	24.0112	9.60282	15.6417				-36.2825	23.667	5.30376	18.0496
	-1.22013	-12.6556	-16.907	10.2263				-1.22013	8.6323	13.0497	-7.03034				-35.9359	24.6512	9.75533	16.1235				-35.9359	23.9499	5.3077	18.3192
	-1.13183	-10.3897	-12.8769	9.74709				-1.13183	8.23286	12.0704	-7.35506				-37.1474	24.8222	9.83653	16.1927				-37.1474	24.3871	5.31217	18.7398
	-1.87227	-7.8131	-8.82213	9.27455				-1.87227	7.84594	11.1147	-7.67524				-36.6948	24.1928	9.79379	15.5608				-36.6948	25.0717	5.31774	19.4037
	-0.176445	-5.54118	-5.46566	8.77565				-0.176445	7.46914	10.1898	-7.9155				-38.1866	23.5801	9.75211	14.9458				-38.1866	25.7371	5.32389	20.05
	1.13959	-6.82348	-6.87802	8.20846				1.13959	7.17044	9.51527	-7.69758				-38.7876	22.9519	9.7093	14.3153				-38.7876	26.4183	5.33094	20.7131
	0.270845	-8.09645	-8.2512	7.65477				0.270845	6.88421	8.85681	-7.49199				-38.9787	23.0293	9.98523	14.1115				-38.9787	26.28	5.55216	20.4481
	0.744909	-9.41659	-9.64734	7.0896				0.744909	6.59763	8.18503	-7.28943				-39.8609	23.1089	10.2559	13.9149				-39.8609	26.139	5.77158	20.1862
	0.140908	-10.192	-10.5308	7.47416				0.140908	6.8418	8.27226	-7.14833				-39.5615	23.1922	10.5349	13.713				-39.5615	25.991	6.00039	19.9169
	0.693958	-10.7698	-11.2464	8.10536				0.693958	7.21918	8.55962	-7.02599				-38.2854	23.9187	11.6044	13.4488				-38.2854	26.4164	6.06679	20.3519
	1.55304	-11.3254	-11.9669	8.75567				1.55304	7.6043	8.85444	-6.90096				-40.1354	25.0367	13.1415	13.1537				-40.1354	27.174	6.03409	21.2013
	0.701268	-11.2883	-12.1122	9.28192				0.701268	7.83122	9.2685	-6.66881				-40.0666	26.2108	14.7386	12.8516				-40.0666	27.9452	6.00259	22.073
	0.934938	-10.4607	-11.4493	9.61272				0.934938	7.82927	9.84214	-6.29119				-38.7738	27.0091	15.9526	12.5354				-38.7738	28.5026	5.95105	22.7371
	-1.91663	-9.62313	-10.7671	9.95057				-1.91663	7.82724	10.4327	-5.90535				-41.8149	26.5636	15.9077	12.1817				-41.8149	28.4057	5.83376	22.7469
	-0.927852	-8.75272	-10.0339	10.2882				-0.927852	7.85407	11.0478	-5.52391				-41.9499	26.1073	15.8592	11.816				-41.9499	28.3057	5.71322	22.7569
	-1.41248	-6.54926	-7.78407	10.6369				-1.41248	8.80247	12.3405	-5.25759				-41.6308	25.6511	15.8082	11.4471				-41.6308	28.205	5.59231	22.767
	-5.41806	-4.3262	-5.43201	10.9871				-5.41806	9.78613	13.6723	-4.98559				-42.5681	24.8984	14.9836	11.3949				-42.5681	29.6876	5.68716	24.2232
	-4.2012	-2.14219	-3.03195	11.3295				-4.2012	10.7801	15.0088	-4.71503				-41.1412	24.0843	14.0073	11.3894				-41.1412	31.4607	5.82722	25.9525
	-5.36477	-1.23169	-1.84499	11.4966				-5.36477	10.8152	15.4128	-4.78661				-42.0285	23.2791	13.0283	11.3798				-42.0285	33.2219	5.9751	27.6762
	-6.94245	-0.977831	-1.30675	11.5747				-6.94245	10.3061	15.3113	-5.05682				-44.8526	20.839	8.818	13.5746				-44.8526	26.8473	6.93492	20.3396
	-8.92109	-0.719918	-0.766984	11.6522				-8.92109	9.78747	15.2103	-5.33441				-42.5565	22.0459	11.2789	12.5358				-42.5565	26.2713	6.8439	20.2138
	-10.0936	-0.250474	-0.0814412	11.6731				-10.0936	9.48963	15.3376	-5.50905				-42.3587	23.0201	12.6703	12.204				-42.3587	25.8235	6.78809	19.9399
	-10.8576	0.869748	1.10083	11.5314				-10.8576	9.83131	16.1403	-5.38535				-41.4554	25.2709	14.5824	12.6521				-41.4554	24.7723	6.68919	18.8394
	-9.3874	1.99282	2.30262	11.3869				-9.3874	10.177	16.9442	-5.26616				-41.1836	27.5987	16.5856	13.1096				-41.1836	23.6917	6.5951	17.7172
	-9.43741	3.09631	3.50008	11.2426				-9.43741	10.5198	17.7334	-5.15378				-42.1757	29.9457	18.6305	13.5655				-42.1757	22.6076	6.50836	16.6003
	-11.6896	2.77888	2.7977	11.3865				-11.6896	10.2459	17.9437	-5.31543				-41.5795	29.8488	18.8522	13.2399				-41.5795	21.7189	6.16114	16.0301
	-12.5317	2.27926	1.82283	11.5705				-12.5317	9.87434	18.0698	-5.52501				-38.2537	29.2258	18.6713	12.7536				-38.2537	20.8884	5.75986	15.5898
	-14.6269	1.80858	0.856844	11.7518				-14.6269	9.49575	18.1961	-5.74317				-40.0901	28.5869	18.486	12.2548				-40.0901	20.0316	5.34283	15.1384
	-7.42774	22.4971	24.3104	4.27358				-7.42774	8.47632	16.0453	-6.89506				-36.16	27.4948	17.7878	11.7687				-36.16	19.8531	5.16993	15.1687
	-7.98904	19.1789	19.252	4.01704				-7.98904	8.31292	15.6934	-6.74707				-38.3026	25.8731	16.4773	11.3089				-38.3026	20.52	5.31148	15.7955
	-7.71946	15.8485	14.2508	3.75587				-7.71946	8.14748	15.334	-6.5982				-37.3892	24.2257	15.1473	10.8388				-37.3892	21.2	5.46161	16.439
	-7.13758	12.5905	9.43057	3.49578				-7.13758	7.98365	14.9749	-6.45175				-35.1122	22.673	13.8733	10.4098				-35.1122	21.8528	5.58297	17.079
	-5.11124	10.8642	6.9611	3.28097				-5.11124	7.52806	14.4763	-6.40874				-35.6341	22.4109	13.34	10.5893				-35.6341	22.094	5.21723	17.5836
	-6.62372	9.79185	5.5212	3.0788				-6.62372	6.91355	13.8915	-6.41468				-35.5894	22.1476	12.7895	10.7685				-35.5894	22.3308	4.84174	18.0975
	-6.24497	8.70032	4.09893	2.87467				-6.24497	6.30237	13.3083	-6.42067				-35.6183	21.8895	12.235	10.943				-35.6183	22.5571	4.46542	18.6085
	-2.72126	7.31656	2.49082	2.7984				-2.72126	5.74706	12.753	-6.45851				-39.0222	21.3073	11.2464	11.2939				-39.0222	22.9347	4.79237	18.5629
	-3.94652	5.05552	0.263212	3.03102				-3.94652	5.27504	12.2129	-6.58134				-36.6536	20.5723	10.0407	11.7396				-36.6536	23.3743	5.43855	18.2585
	-1.99928	2.74634	-1.88567	3.23875				-1.99928	4.80534	11.6748	-6.70377				-36.8435	19.8604	8.85488	12.1852				-36.8435	23.7842	6.05873	17.957
	-1.35454	0.449473	-3.91208	3.418				-1.35454	4.34905	11.1515	-6.8229				-38.8966	19.6932	8.08474	12.8447				-38.8966	24.1363	6.48043	17.8055
	-2.30591	0.760003	-3.55813	3.47882				-2.30591	4.02193	10.666	-6.97745				-38.1894	20.7802	8.19616	14.075				-38.1894	24.4431	6.51712	17.9961
	-2.42838	1.37768	-2.92441	3.5261				-2.42838	3.71177	10.1869	-7.1356				-37.1937	21.8672	8.29383	15.2916				-37.1937	24.7491	6.55415	18.1861
	-1.93515	1.9779	-2.30172	3.57143				-1.93515	3.40982	9.71968	-7.28984				-38.5226	22.9284	8.37598	16.4649				-38.5226	25.047	6.59061	18.3712
	0.130532	1.83134	-2.34281	3.89464				0.130532	3.43137	9.7876	-7.39481				-38.938	26.7511	11.7124	17.3674				-38.938	25.9597	7.16295	18.6248
	-1.19516	0.996538	-3.00145	4.47613				-1.19516	3.76069	10.3607	-7.45275				-40.9407	30.9417	15.4559	18.2271				-40.9407	26.9055	7.75843	18.8846
	-1.71704	0.198174	-3.62904	5.04642				-1.71704	4.0857	10.921	-7.51164				-39.7111	35.1056	19.1782	19.0523				-39.7111	27.7992	8.30796	19.1377
	1.63336	-0.0639999	-3.68245	5.47409				1.63336	4.32256	11.4307	-7.57622				-32.755	15.7558	3.63554	14.5806				-32.755	16.8942	8.08226	9.06634
	-3.42553	3.04745	-0.137405	4.93235				-3.42553	3.95051	11.5428	-7.65585				-31.6486	16.9411	4.61786	14.7304				-31.6486	17.6061	8.06489	9.7453
	-1.12405	6.22246	3.48657	4.40351				-1.12405	3.58321	11.6527	-7.73847				-32.8478	18.1463	5.63466	14.8788				-32.8478	18.3176	8.04961	10.4298
	1.74434	9.61682	7.3814	3.86188				1.74434	3.2027	11.7655	-7.82817				-32.7064	19.3342	6.65338	15.0214				-32.7064	19.0075	8.03681	11.0992
	-0.570273	8.21918	5.19627	3.82817				-0.570273	2.69434	12.2562	-7.51962				-33.158	18.3652	5.86795	14.8503				-33.158	19.6885	7.89034	11.8552
	-3.55581	5.57684	1.31007	3.94088				-3.55581	2.1567	12.851	-7.1029				-32.4359	16.5472	4.36169	14.5479				-32.4359	20.3521	7.68692	12.636
	-1.99019	3.09655	-2.54187	4.0474				-1.99019	1.60173	13.4617	-6.6827				-31.9385	14.8089	2.91462	14.2474				-31.9385	20.9918	7.48495	13.3964
	-7.2036	6.67095	2.4848	4.50819				-7.2036	2.51131	15.0038	-6.83286				-32.6269	14.386	2.67389	14.0125				-32.6269	21.5569	7.3361	14.0508
	-8.20015	6.37587	2.25886	4.56908				-8.20015	2.30978	14.4234	-7.08217				-33.8002	16.6367	4.93684	13.9262				-33.8002	21.9578	7.30714	14.4643
	-6.1364	6.07103	2.02882	4.6301				-6.1364	2.10397	13.8291	-7.33731				-35.8933	18.9299	7.28923	13.837				-35.8933	22.3482	7.27913	14.8687
	-3.81489	5.53433	1.41804	4.66529				-3.81489	2.04711	13.4797	-7.45433				-35.3706	21.3708	9.83364	13.7404				-35.3706	22.7471	7.25068	15.2836
	-5.35976	4.37728	-0.243529	4.6297				-5.35976	2.41098	13.8319	-7.17763				-36.3033	20.936	9.13666	13.9543				-36.3033	24.2843	7.068	16.8256
	-4.95491	3.2159	-1.92485	4.59305				-4.95491	2.78281	14.1938	-6.89328				-37.1153	20.3994	8.30786	14.1683				-37.1153	25.8192	6.88343	18.366
	-2.32033	2.07898	-3.58595	4.55623				-2.32033	3.15367	14.5566	-6.60801				-36.3068	19.8622	7.45068	14.3789				-36.3068	27.3761	6.69471	19.9298
	-5.95064	1.99056	-4.00938	4.29706				-5.95064	2.97445	14.3097	-6.84676				-36.4229	19.9528	7.09914	14.7239				-36.4229	28.7237	6.54517	21.2543
	-4.8282	2.0456	-4.2719	3.99782				-4.8282	2.7108	13.969	-7.16619				-37.2021	20.4774	7.11157	15.1544				-37.2021	29.8966	6.43001	22.38
	-4.40075	2.10045	-4.53399	3.69787				-4.40075	2.44578	13.6285	-7.48476				-38.2527	21.0129	7.11919	15.5859				-38.2527	31.0848	6.31732	23.5164
	-4.59224	2.01749	-4.78607	3.78724				-4.59224	2.4456	13.4211	-7.91933				-38.3517	20.943	6.57065	15.9206				-38.3517	32.1699	6.2485	24.5214
	-3.95252	1.79524	-5.03721	4.29349				-3.95252	2.72671	13.3437	-8.49539				-38.0936	18.6183	3.98589	15.9023				-38.0936	32.8592	6.33211	25.0378
	-2.98081	1.58599	-5.28377	4.80407				-2.98081	3.01083	13.2676	-9.06771				-41.0128	16.3409	1.43922	15.8819				-41.0128	33.5632	6.41686	25.5631
	-5.80565	1.55075	-5.24008	5.28265				-5.80565	3.38621	13.258	-9.57102				-41.3526	14.1712	-1.00098	15.8596				-41.3526	34.2666	6.50085	26.0856
	-3.86971	3.0141	-2.57571	5.54797				-3.86971	4.65254	13.8393	-9.60748				-39.2666	32.6261	19.9336	15.38				-39.2666	24.3062	7.79809	16.6512
	-4.82527	4.56134	0.135356	5.80863				-4.82527	5.91925	14.4257	-9.64672				-41.2843	33.8742	22.0014	14.6441				-41.2843	23.1497	7.58442	15.7454
	-2.77045	6.15184	2.83027	6.05858				-2.77045	7.15577	15.0031	-9.68767				-39.8074	35.1512	23.9923	13.8982				-39.8074	22.0194	7.37494	14.8593
	-1.89872	5.25099	2.05512	6.8313				-1.89872	7.95153	15.401	-9.78142				-39.1525	32.8448	22.3873	12.9686				-39.1525	21.2267	7.23191	14.315
	-3.04996	3.45523	-0.0304673	7.81771				-3.04996	8.56634	15.7237	-9.89448				-38.87	27.4533	17.7823	11.9153				-38.87	20.7474	7.15282	14.0873
	-6.1897	1.82493	-1.98627	8.7942				-6.1897	9.1686	16.0402	-10.0047				-37.8209	22.2803	13.4441	10.8874				-37.8209	20.2769	7.07783	13.8682
	-4.34264	1.32047	-2.57155	9.52033				-4.34264	9.82724	16.4655	-10.0485				-36.0852	18.0045	10.0529	9.8782				-36.0852	19.7108	6.98492	13.5664
	-5.03921	2.83663	-0.54112	9.69794				-5.03921	10.5636	17.0827	-9.96035				-37.1665	18.3266	11.1291	9.06245				-37.1665	18.7008	6.7922	12.8357
	-3.74766	4.30898	1.48189	9.86928				-3.74766	11.2855	17.6879	-9.87408				-33.7733	18.6682	12.2017	8.26461				-33.7733	17.7116	6.60049	12.1184
	-3.32399	5.8026	3.58961	10.042				-3.32399	12.0252	18.3082	-9.78584				-33.9988	19.0444	13.3175	7.44916				-33.9988	16.6989	6.40131	11.3823
	-7.15796	4.87546	2.95152	10.6126				-7.15796	12.7613	18.9215	-9.84659				-34.1312	20.4878	14.4714	7.79243				-34.1312	16.3776	6.45943	11.0362
	-8.96559	3.87288	2.25764	11.1696				-8.96559	13.4877	19.5242	-9.91102				-34.4679	22.1809	15.6051	8.43381				-34.4679	16.2468	6.58447	10.8024
	-6.71937	2.83146	1.56876	11.7232				-6.71937	14.2357	20.1423	-9.977				-32.1698	23.9197	16.7663	9.08823				-32.1698	16.1112	6.71172	10.5628
	-5.86759	4.61577	3.6189	9.65926				-5.86759	9.9553	15.9274	-10.4534				-32.5302	24.954	17.1994	9.75937				-32.5302	16.1335	6.74879	10.4814
	-2.90647	1.64535	-0.525984	8.92869				-2.90647	8.06735	14.2905	-10.8462				-32.8441	24.9637	16.5903	10.4407				-32.8441	16.3814	6.66304	10.6307
	-1.49444	-1.3404	-4.55107	8.20363				-1.49444	6.1841	12.6636	-11.2383				-32.3633	24.9841	15.9696	11.1412				-32.3633	16.6359	6.58293	10.7893
	-0.979519	-2.92395	-6.58974	7.6541				-0.979519	5.13132	11.7449	-11.3941				-31.2982	24.9742	15.3008	11.8548				-31.2982	16.9	6.52303	10.953
	2.00901	-2.82081	-6.36483	7.31817				2.00901	5.06437	11.6629	-11.272				-32.7282	23.7137	13.0421	12.8899				-32.7282	17.4456	6.85449	11.095
	2.08343	-2.70731	-6.13246	6.97514				2.08343	4.99604	11.5789	-11.1472				-31.5517	22.511	10.7859	13.9548				-31.5517	17.9959	7.18321	11.2434
	2.5525	-2.61517	-5.9455	6.64372				2.5525	4.90672	11.4836	-11.0353				-30.8582	21.4018	8.59784	15.0222				-30.8582	18.536	7.49996	11.3947
	4.38351	-2.86192	-6.31425	6.44326				4.38351	4.57206	11.2586	-11.0745				-33.6128	20.7217	7.61629	15.3117				-33.6128	19.1696	7.53239	11.9071
	3.86143	-3.11572	-6.69171	6.23842				3.86143	4.22925	11.0284	-11.1148				-34.0865	20.2206	7.24496	15.1776				-34.0865	19.8805	7.41287	12.6371
	3.48633	-3.37054	-7.06886	6.03412				3.48633	3.88647	10.7985	-11.1553				-33.2493	19.7207	6.87694	15.0432				-33.2493	20.5882	7.29407	13.3644
	5.33812	-2.32492	-5.72872	6.0673				5.33812	4.15204	10.8302	-11.0676				-34.8117	19.1523	6.32187	15.0197				-34.8117	21.2415	7.23438	13.9815
	5.89328	-0.6427	-3.55047	6.20681				5.89328	4.69248	10.9794	-10.9228				-37.5818	18.3429	5.1725	15.3157				-37.5818	21.8056	7.33875	14.3439
	4.28145	1.06826	-1.33301	6.34649				4.28145	5.22825	11.1292	-10.7813				-35.6625	17.5593	4.0402	15.6104				-35.6625	22.3685	7.44272	14.7071
	4.88797	1.84151	-0.258476	6.50924				4.88797	6.0115	11.577	-10.5821				-35.6035	16.8164	2.94771	15.898				-35.6035	22.9189	7.54419	15.0637
	2.58293	0.530029	-1.72708	6.73466				2.58293	7.41078	12.7256	-10.2341				-37.0252	17.9016	3.46276	16.4828				-37.0252	23.5861	7.49494	15.682
	2.24408	-0.761059	-3.17101	6.96027				2.24408	8.80947	13.8818	-9.88584				-37.0418	19.2594	4.22442	17.1129				-37.0418	24.27	7.42565	16.3371
	4.60409	-2.0019	-4.55782	7.18071				4.60409	10.1738	15.0179	-9.54576				-37.2733	20.6223	4.99841	17.7438				-37.2733	24.9521	7.3586	16.9896
	-0.755137	-2.38533	-4.93243	7.79911				-0.755137	9.87513	15.4076	-9.74741				-41.998	5.7711	-13.8963	17.6234				-41.998	24.777	7.20471	17.1357
	-2.12733	-2.67921	-5.21616	8.45346				-2.12733	9.42642	15.7345	-10.0108				-42.2856	7.0977	-12.1059	17.2044				-42.2856	24.2691	7.11599	16.7707
	-2.44952	-2.94898	-5.48802	9.1002				-2.44952	8.97297	16.0559	-10.2868				-39.7776	8.68861	-9.93833	16.7758				-39.7776	23.7495	7.02433	16.3967
	-3.83864	-2.34374	-5.2448	9.21402				-3.83864	8.65276	16.2913	-10.3389				-39.8027	10.5077	-7.45819	16.3469				-39.8027	23.2294	6.93169	16.0217
	-5.05494	-1.04302	-4.55703	8.84969				-5.05494	8.46044	16.449	-10.188				-37.1539	11.1935	-6.02705	15.7653				-37.1539	22.8809	6.76042	15.868
	-3.65024	0.190105	-3.86862	8.47092				-3.65024	8.27282	16.6032	-10.041				-36.3466	11.2904	-5.13688	15.0874				-36.3466	22.6017	6.54135	15.8186
	-5.12588	1.10417	-3.49403	8.04888				-5.12588	8.046	16.6699	-9.97206				-39.3366	11.4117	-4.22138	14.4104				-39.3366	22.319	6.31881	15.7691
	-7.13069	0.435597	-4.8493	7.58054				-7.13069	7.65236	16.2815	-10.3085				-37.6756	11.6395	-2.99472	13.6427				-37.6756	22.075	6.11804	15.7394
	-5.84042	-0.209572	-6.16373	7.12571				-5.84042	7.26618	15.9034	-10.636				-35.1404	12.1725	-0.871412	12.5629				-35.1404	21.9133	5.95991	15.7576
	-2.27807	-0.86549	-7.5074	6.66032				-2.27807	6.86701	15.5156	-10.9718				-36.4504	12.8068	1.29756	11.4801				-36.4504	21.7498	5.7999	15.7762
	-5.0609	-1.31949	-8.04624	6.56531				-5.0609	6.19672	14.897	-11.1619				-37.781	13.5243	3.45391	10.4208				-37.781	21.5885	5.64193	15.7946
	-1.83271	-1.71459	-8.36251	6.56728				-1.83271	5.47415	14.2344	-11.3093				-39.1048	13.4084	3.17463	10.5683				-39.1048	21.4387	5.53497	15.789
	-2.15445	-2.12319	-8.68498	6.56776				-2.15445	4.73606	13.5573	-11.4599				-39.3576	13.1947	2.61032	10.8582				-39.3576	21.2899	5.43392	15.7811
	-1.03843	-2.23315	-8.95245	6.23625				-1.03843	4.14989	13.0312	-11.6511				-38.0912	12.9928	2.06393	11.1413				-38.0912	21.1438	5.33471	15.774
	-0.73716	-1.91519	-9.13408	5.4514				-0.73716	3.78668	12.7278	-11.895				-38.2301	13.4155	2.33968	11.4103				-38.2301	21.3594	5.37376	15.9418
	1.17664	-1.58542	-9.31389	4.65065				1.17664	3.41277	12.4172	-12.145				-35.9199	14.425	3.38193	11.6547				-35.9199	21.912	5.54146	16.2704
	0.91125	-1.27139	-9.49653	3.87729				0.91125	3.03329	12.1093	-12.3891				-36.3649	15.4228	4.39659	11.887				-36.3649	22.4503	5.70304	16.5905
	4.17336	-1.51512	-9.9358	3.79175				4.17336	2.55919	11.8804	-12.4567				-37.1096	15.8727	4.79539	12.0823				-37.1096	22.9865	5.83007	16.9365
	4.86094	-1.76339	-10.3849	3.70418				4.86094	2.07275	11.6465	-12.5268				-37.9238	12.8656	1.38403	12.0493				-37.9238	23.4353	5.73603	17.3957
	4.91724	-2.01025	-10.8333	3.61659				4.91724	1.58552	11.4131	-12.5975				-38.6656	10.1157	-1.79968	12.0101				-38.6656	23.8719	5.64668	17.8424
	4.91922	-1.13016	-9.8374	3.33598				4.91922	1.35066	11.4942	-12.6441				-36.3333	7.50638	-4.89013	11.9629				-36.3333	24.3175	5.55769	18.2986
	4.95619	0.426491	-7.98428	2.93966				4.95619	1.24317	11.7488	-12.6807				-40.0756	9.41862	-3.6656	12.6492				-40.0756	24.6518	5.37689	18.7031
	2.31141	2.02333	-6.08281	2.54285				2.31141	1.13456	12.0035	-12.7191				-39.0407	12.7379	-1.03051	13.5427				-39.0407	24.9423	5.19827	19.0869
	3.97621	3.49204	-4.28823	2.2704				3.97621	1.04131	12.3053	-12.7064				-39.1723	16.2707	1.85224	14.4591				-39.1723	25.237	5.04571	19.4848
	2.80417	4.63442	-2.751	2.32293				2.80417	0.985551	12.7639	-12.5452				-40.5047	13.6753	-1.75398	15.1662				-40.5047	26.5493	5.48386	20.2239
	1.89353	5.78024	-1.19468	2.37483				1.89353	0.92951	13.2222	-12.3844				-41.8542	13.6252	-1.47897	14.9268				-41.8542	26.3996	5.41005	20.1603
	2.1267	6.90866	0.353032	2.42517				2.1267	0.874163	13.6718	-12.2269				-40.0304	13.5758	-1.197	14.6811				-40.0304	26.246	5.33746	20.0966
	2.34878	5.99358	-1.02903	2.46224				2.34878	0.393096	13.645	-12.3825				-39.9089	13.8403	-0.671821	14.5113				-39.9089	26.088	5.307	19.9877
	0.381131	4.82588	-2.79368	2.49725				0.381131	-0.150683	13.5515	-12.5851				-40.1216	14.9998	0.549414	14.5614				-40.1216	25.922	5.38891	19.7501
	1.64043	3.69532	-4.52705	2.53206				1.64043	-0.697949	13.4585	-12.791				-38.8042	16.2178	1.83692	14.6127				-38.8042	25.7502	5.4726	19.5067
	2.92331	3.14997	-5.47105	2.36853				2.92331	-1.22907	13.1782	-12.998				-39.2429	17.4651	3.15984	14.6641				-39.2429	25.5768	5.55604	19.2632
	2.84473	3.11361	-5.72229	2.01119				2.84473	-1.76386	12.7083	-13.2119				-37.3013	17.6948	3.25234	14.7149				-37.3013	25.7219	5.52612	19.4277
	2.94691	3.07721	-5.97303	1.65572				2.94691	-2.29881	12.239	-13.4255				-37.3583	17.7852	3.1691	14.7648				-37.3583	25.916	5.47989	19.6558
	-1.39122	2.93949	-6.27573	1.43358				-1.39122	-2.65188	11.9114	-13.6256				-38.3772	17.8758	3.08386	14.8121				-38.3772	26.1094	5.43437	19.8847
	2.15537	2.07876	-6.99426	2.07768				2.15537	-1.81349	12.4942	-13.7763				-39.0026	18.3948	3.30888	15.1408				-39.0026	26.4736	5.49771	20.1724
	3.27732	1.23531	-7.69081	2.7226				3.27732	-0.967791	13.0784	-13.9266				-37.5822	19.3906	3.87045	15.7818				-37.5822	27.0353	5.68417	20.5382
	0.928752	0.428633	-8.3503	3.3528				0.928752	-0.135171	13.6501	-14.0727				-39.8253	20.3873	4.42923	16.4207				-39.8253	27.5961	5.87897	20.9075
	3.66765	2.10294	-6.07953	3.15504				3.66765	-0.276535	13.5016	-14.6239				-39.9706	21.0519	4.72549	16.9484				-39.9706	28.0959	6.09786	21.2076
	5.14824	4.72838	-2.69051	2.66888				5.14824	-0.767417	13.1026	-15.313				-40.9706	18.8953	2.78714	16.6158				-40.9706	28.1667	6.51788	20.9259
	2.26823	7.40347	0.763331	2.19386				2.26823	-1.25629	12.7134	-15.9875				-42.0022	16.7879	0.930389	16.28				-42.0022	28.2234	6.93866	20.6435
	3.15141	9.07873	2.88471	1.84152				3.15141	-1.78773	12.4765	-16.4308				-42.8215	14.7826	-0.797534	15.9493				-42.8215	28.2648	7.35005	20.3673
	7.47784	8.7588	2.33638	1.72136				7.47784	-2.35911	12.5185	-16.4457				-39.3193	16.0304	0.355237	16.3924				-39.3193	28.3978	7.629	20.2834
	5.37116	8.44719	1.80272	1.60424				5.37116	-2.91881	12.5604	-16.4618				-42.0475	18.6094	2.6545	17.1282				-42.0475	28.5667	7.85251	20.2772
	6.08471	8.12877	1.25773	1.48445				6.08471	-3.49404	12.6042	-16.4799				-44.5031	21.1901	4.93204	17.833				-44.5031	28.7282	8.07072	20.2715
	6.47537	9.12261	1.95008	0.696423				6.47537	-3.93205	12.378	-16.2698				-43.2213	22.6306	5.88859	18.5206				-43.2213	28.8781	8.28873	20.2388
	8.27412	10.1112	2.66744	-0.0807236				8.27412	-4.35488	12.1555	-16.062				-44.4783	20.055	1.01332	20.4427				-44.4783	29.2278	8.88698	19.9876
	7.49493	11.1296	3.43376	-0.877812				7.49493	-4.78458	11.9284	-15.8486				-44.0541	20.9667	4.17104	18.845				-44.0541	30.1644	9.53642	20.2746
	7.98086	10.2892	1.85178	-1.29453				7.98086	-5.33345	11.7038	-16.1975				-44.6358	18.3151	4.34136	15.6303				-44.6358	28.631	7.93812	20.5846
	12.1119	8.35386	-1.09235	-1.46622				12.1119	-5.95556	11.4857	-16.8914				-43.3043	20.2025	7.43202	14.5118				-43.3043	28.4424	7.40346	20.9658
	12.0448	6.4134	-4.0347	-1.64151				12.0448	-6.60786	11.2624	-17.6109				-43.4866	20.9326	9.00886	13.675				-43.4866	28.2225	7.07605	21.0968
	11.7803	4.9235	-6.27061	-1.76637				11.7803	-6.98881	11.1088	-17.9653				-44.278	20.1371	8.62104	13.186				-44.278	27.9997	7.01971	20.9327
	13.0608	4.77051	-6.41603	-1.7308				13.0608	-6.47015	11.1789	-17.1383				-44.4058	19.3222	8.2232	12.6848				-44.4058	27.7714	6.96195	20.7645
	12.8048	4.61374	-6.56428	-1.69461				12.8048	-5.9578	11.2506	-16.3053				-44.1089	18.5731	7.87171	12.2069				-44.1089	27.5595	6.89994	20.6157
	13.9584	4.45691	-6.7118	-1.65867				13.9584	-5.46359	11.3223	-15.4861				-44.609	18.6076	8.07436	12.0127				-44.609	27.5449	6.78977	20.6977
	12.6662	4.88898	-5.8844	-1.45695				12.6662	-5.41717	11.3973	-15.3063				-44.6779	18.6817	8.49245	11.6138				-44.6779	27.5117	6.56248	20.8655
	11.2542	5.4384	-4.86406	-1.22136				11.2542	-5.44465	11.4747	-15.2301				-44.5036	17.6127	7.27204	11.6941				-44.5036	27.2898	6.63337	20.6237
	13.0871	5.9935	-3.83857	-0.985539				13.0871	-5.47211	11.5522	-15.1538				-42.8099	16.0593	5.42028	11.9012				-42.8099	26.9672	6.78919	20.2281
	9.99956	5.11688	-4.87774	-0.602662				9.99956	-4.74206	11.6566	-15.2067				-41.3021	14.5601	3.6256	12.1084				-41.3021	26.6419	6.94556	19.8311
	9.9334	2.68147	-8.22591	-0.0262121				9.9334	-3.10425	11.8026	-15.4105				-43.0235	13.9446	2.86545	12.2424				-43.0235	26.4164	7.17759	19.4318
	10.5638	0.424945	-11.439	0.554847				10.5638	-1.46533	11.9564	-15.6144				-42.1255	15.1809	4.27115	12.2214				-42.1255	26.3919	7.5861	19.002
	7.20003	-1.73333	-14.5776	1.19857				7.20003	0.137076	12.1621	-15.7112				-44.1319	17.725	7.12767	12.1758				-44.1319	26.2897	8.35791	18.1506
	8.09773	-5.19539	-18.9375	2.70019				8.09773	1.7817	12.9193	-14.6369				-43.2038	18.916	7.86732	12.7753				-43.2038	27.2294	8.27926	18.9588
	6.37486	-8.30069	-23.0777	4.212				6.37486	3.37552	13.6801	-13.5889				-43.3938	21.2533	9.19623	14.0497				-43.3938	29.2409	8.06549	20.7355
	4.0654	-10.9364	-26.9492	5.68669				4.0654	4.87446	14.422	-12.5956				-44.901	21.7152	8.85622	14.8525				-44.901	29.7295	7.96441	21.1745
	5.41799	-10.5618	-23.9856	6.41118				5.41799	5.30786	14.3273	-11.5819				-44.358	23.673	8.08232	16.986				-44.358	30.661	7.53673	22.3485
	5.10529	-8.38728	-18.1613	6.77946				5.10529	5.28045	13.8708	-10.5858				-44.8388	23.8506	8.94169	16.3839				-44.8388	30.472	7.16872	22.5913
	3.8421	-5.67179	-12.4206	7.11554				3.8421	5.24768	13.4267	-9.63679				-44.384	23.871	9.32954	16.061				-44.384	30.3288	6.9607	22.6914
	4.32535	-4.04922	-8.9615	7.51577				4.32535	5.3361	13.1574	-8.76728				-44.3642	23.6755	9.32963	15.7952				-44.3642	30.3179	6.8096	22.8574
	0.730038	-5.77873	-10.7929	8.07333				0.730038	5.68152	13.2732	-8.07757				-44.1669	22.5038	7.95156	15.1704				-44.1669	30.9064	6.46739	23.7941
	2.50244	-7.42276	-12.5322	8.61586				2.50244	6.00924	13.3865	-7.41014				-42.8455	18.7869	3.15702	15.1668				-42.8455	31.8324	6.07422	24.8235
	0.382676	-9.06219	-14.2684	9.16969				0.382676	6.33566	13.5026	-6.73204				-44.4529	17.4208	1.33671	15.2396				-44.4529	32.1053	6.0531	25.0296
	1.90625	-7.72885	-12.3242	8.31184				1.90625	5.76488	12.8107	-6.44278				-44.5484	18.9872	1.95753	15.9325				-44.5484	33.7219	5.22985	27.0697
	1.0593	-6.05974	-10.1054	7.38502				1.0593	5.15392	12.0755	-6.17835				-42.8255	26.8468	13.8252	15.0527				-42.8255	27.5139	6.69994	20.288
	0.559044	-4.26906	-7.86504	6.49063				0.559044	4.56758	11.3604	-5.92309				-43.2068	23.4755	10.9431	14.3912				-43.2068	25.992	6.5216	19.0394
	1.1847	-3.77455	-7.35096	6.21498				1.1847	4.75575	11.4858	-5.53981				-44.0679	25.5299	13.3105	14.3273				-44.0679	24.9768	6.48209	18.115
	0.912824	-4.36487	-8.22126	6.4183				0.912824	5.53048	12.2598	-5.06176				-42.2848	27.5923	15.6453	14.2569				-42.2848	23.9837	6.44438	17.2109
	-2.87096	-4.92193	-9.06302	6.61695				-2.87096	6.28122	13.0169	-4.59376				-41.3282	29.7601	18.0582	14.1765				-41.3282	22.9644	6.40663	16.2833
	-0.405693	-5.30727	-9.62287	6.92761				-0.405693	6.75407	13.6386	-4.18811				-39.2222	26.5623	15.3905	13.3864				-39.2222	22.1091	6.12388	15.7601
	-0.200351	-4.99192	-8.94305	7.6913				-0.200351	6.00143	13.6103	-4.10237				-38.0022	23.1049	12.4687	12.5476				-38.0022	21.2593	5.82178	15.2586
	-2.35688	-4.68585	-8.27824	8.44535				-2.35688	5.25815	13.5842	-4.02675				-36.6166	19.7848	9.65577	11.7206				-36.6166	20.4262	5.52158	14.768
	-5.02364	-4.37546	-7.59887	9.22354				-5.02364	4.49109	13.559	-3.95798				-36.3222	19.003	8.95097	11.5458				-36.3222	19.911	5.50597	14.2872
	-4.73047	-1.4338	-3.76856	9.3457				-4.73047	4.91431	14.5527	-3.13262				-36.7574	20.172	9.87404	11.8838				-36.7574	19.649	5.71129	13.825
	-5.72304	2.16671	0.868571	9.31602				-5.72304	5.58826	15.7541	-2.14516				-34.5489	21.3191	10.7828	12.2138				-34.5489	19.3873	5.90833	13.3755
	-7.82213	5.99838	5.84123	9.28234				-7.82213	6.27035	16.9837	-1.12563				-36.078	22.342	11.5228	12.6001				-36.078	19.2378	6.02103	13.1073
	-10.5085	10.6316	11.6177	8.97157				-10.5085	6.76784	18.0369	-0.635261				-34.4976	22.7055	11.4292	13.1845				-34.4976	19.6042	5.77821	13.6391
	-12.3393	16.0944	18.3688	8.30215				-12.3393	7.03278	18.8431	-0.836117				-34.1508	23.0626	11.332	13.7489				-34.1508	19.9569	5.54913	14.1597
	-12.9264	21.8177	25.8518	7.57858				-12.9264	7.31069	19.6737	-1.05551				-36.3908	23.429	11.227	14.3183				-36.3908	20.3117	5.32359	14.6921
	-15.6028	27.0268	33.0463	6.87451				-15.6028	7.55485	20.4448	-1.29234				-36.0112	20.4904	7.66302	14.7733				-36.0112	20.0634	5.41285	14.4036
	-16.5617	23.9205	28.5198	6.9696				-16.5617	7.21899	20.3169	-1.60066				-34.3197	17.1078	3.63115	15.1947				-34.3197	19.6826	5.57913	13.9522
	-15.8579	20.7913	23.9967	7.06611				-15.8579	6.87024	20.1858	-1.91957				-34.0934	13.9349	-0.19371	15.6252				-34.0934	19.2885	5.76033	13.5064
	-15.9217	17.7259	19.6045	7.1617				-15.9217	6.51666	20.0545	-2.24159				-33.9178	10.8632	-4.25706	16.2834				-33.9178	19.5099	5.95352	13.6032
	-15.3896	15.433	16.7507	7.70393				-15.3896	6.61208	19.8046	-2.54287				-34.9976	8.13635	-8.42747	17.1941				-34.9976	20.4974	6.14407	14.3571
	-14.3075	13.4068	14.5459	8.47458				-14.3075	6.92667	19.4876	-2.84739				-34.9356	5.99294	-12.0297	18.1082				-34.9356	21.5118	6.33742	15.1298
	-13.7753	11.3983	12.428	9.23627				-13.7753	7.24053	19.1703	-3.15411				-35.8782	4.6738	-14.6018	18.9313				-35.8782	22.4886	6.51309	15.8786
	-14.4075	9.75148	10.4811	9.5993				-14.4075	7.36211	18.839	-3.38932				-35.2946	5.74277	-13.3784	18.7536				-35.2946	22.9284	6.46612	16.3183
	-9.96956	8.83551	8.6268	9.01939				-9.96956	7.01752	18.4454	-3.46194				-35.828	7.04891	-11.8371	18.5708				-35.828	23.3784	6.41774	16.7688
	-11.9932	7.93873	6.78581	8.43776				-11.9932	6.67379	18.0523	-3.53455				-36.3188	8.56209	-10.0202	18.387				-36.3188	23.8279	6.36905	17.2191
	-11.2729	7.08193	5.00144	7.86844				-11.2729	6.33907	17.669	-3.60545				-38.182	9.69038	-8.28772	18.1715				-38.182	23.9186	6.38283	17.2204
	-9.86415	7.55235	5.45242	7.52938				-9.86415	5.47576	16.8431	-4.48223				-39.3822	10.691	-6.56385	17.9176				-39.3822	23.8411	6.43598	17.0099
	-9.8534	8.17777	6.15712	7.21789				-9.8534	4.53729	15.9717	-5.44424				-39.9556	11.7784	-4.79301	17.6459				-39.9556	23.7625	6.49985	16.8025
	-6.65973	8.79934	6.85437	6.91501				-6.65973	3.60162	15.1223	-6.38221				-40.372	12.8404	-3.34705	17.4642				-40.372	23.671	6.52066	16.6553
	-5.47964	8.50653	6.18268	6.65229				-5.47964	3.06215	14.7057	-7.23249				-36.866	13.7609	-2.65139	17.5222				-36.866	23.5406	6.41257	16.6387
	-6.54216	7.3948	4.27263	6.42991				-6.54216	2.90972	14.6975	-7.98698				-38.6333	14.6989	-1.91911	17.5714				-38.6333	23.409	6.3032	16.6222
	-5.25037	6.34158	2.42676	6.21021				-5.25037	2.75486	14.6897	-8.72951				-38.3348	15.6311	-1.1703	17.6109				-38.3348	23.2795	6.19519	16.6062
	-5.03298	5.08837	0.350288	6.09379				-5.03298	2.49913	14.6743	-9.49306				-39.3677	15.0558	-1.72446	17.4432				-39.3677	24.0207	6.03011	17.4131
	-5.03684	2.70578	-2.8768	6.6066				-5.03684	1.70185	14.6143	-10.2793				-39.6305	14.3227	-2.41855	17.252				-39.6305	24.8474	5.85864	18.3115
	-1.35027	0.512044	-5.91319	7.11087				-1.35027	0.894829	14.5558	-11.0707				-36.8246	13.6153	-3.09156	17.0639				-36.8246	25.6454	5.69068	19.1913
	-2.65598	-1.5878	-8.90661	7.62912				-2.65598	0.0407307	14.4961	-11.9036				-38.2968	13.9388	-2.87142	17.0812				-38.2968	26.5694	5.65816	20.0604
	-3.55037	2.09871	-3.90679	6.83061				-3.55037	-0.493333	14.5875	-12.5681				-41.2435	15.2223	-1.79962	17.2873				-41.2435	27.5948	5.75332	20.8977
	-1.46843	7.93558	3.88946	5.67097				-1.46843	-0.928629	14.7203	-13.1758				-41.5452	16.503	-0.708928	17.4871				-41.5452	28.5964	5.84838	21.7158
	-1.68445	14.5719	12.7502	4.48449				-1.68445	-1.38869	14.8564	-13.8124				-41.7174	18.0333	0.707872	17.6954				-41.7174	29.6418	5.92243	22.5936
	-2.3742	16.0367	14.2753	3.65399				-2.3742	-1.59836	14.9158	-14.043				-43.1704	20.7915	3.7178	17.9369				-43.1704	30.8265	5.85522	23.7202
	-0.11105	9.30314	4.21308	3.37369				-0.11105	-1.41315	14.859	-13.6456				-44.07	23.6065	6.77097	18.1684				-44.07	31.9775	5.78979	24.8132
	-0.0505416	2.93569	-5.22978	3.08808				-0.0505416	-1.22772	14.801	-13.243				-44.573	26.5919	9.99085	18.4001				-44.573	33.1458	5.7232	25.9207
	-0.420901	-2.72552	-13.7761	2.79441				-0.420901	-1.06608	14.7418	-12.8667				-40.8258	17.4848	5.89003	12.8565				-40.8258	24.4295	5.89669	18.2373
	2.80513	1.70109	-8.16848	2.05907				2.80513	-2.06378	14.6296	-13.8361				-40.7586	17.1814	6.00578	12.4064				-40.7586	23.718	5.83886	17.5646
	4.69678	6.23717	-2.32069	1.32517				4.69678	-3.07284	14.5204	-14.8087				-38.3205	16.8871	6.11889	11.9681				-38.3205	23.0237	5.78695	16.9123
	4.82716	11.1135	4.16915	0.554173				4.82716	-4.14869	14.4085	-15.8374				-40.2899	16.5864	6.23535	11.5185				-40.2899	22.31	5.7382	16.2458
	2.36962	11.8679	5.13915	0.454742				2.36962	-4.0285	14.6435	-16.0689				-37.5254	17.0885	6.3517	11.8689				-37.5254	22.395	5.6069	16.3958
	4.51954	10.3002	2.88037	0.73616				4.51954	-3.23603	15.0651	-15.8444				-38.189	17.599	6.46496	12.231				-38.189	22.4991	5.4875	16.5675
	2.3917	8.75576	0.627707	1.02613				2.3917	-2.42523	15.498	-15.6161				-39.0197	18.1229	6.58136	12.6018				-39.0197	22.6049	5.376	16.747
	5.5517	7.54726	-1.10672	1.29663				5.5517	-1.67542	15.8837	-15.3817				-37.7796	17.7227	5.46421	13.205				-37.7796	22.9903	5.35562	17.1147
	4.01495	7.1483	-1.49984	1.50178				4.01495	-1.1124	16.1265	-15.1335				-38.9971	16.7679	3.58861	13.9504				-38.9971	23.5536	5.39565	17.5977
	4.28644	6.73931	-1.89809	1.71106				4.28644	-0.538753	16.3756	-14.8812				-38.9808	15.8606	1.72296	14.7149				-38.9808	24.1303	5.44212	18.0918
	2.50231	6.32998	-2.29188	1.91943				2.50231	0.0316725	16.6251	-14.6309				-42.3253	12.1409	-5.52062	17.681				-42.3253	30.0878	7.2451	21.7846
	2.97575	4.38886	-4.64747	2.545				2.97575	0.482046	16.561	-14.5891				-41.6362	11.7709	-6.63981	18.1371				-41.6362	30.7592	7.17938	22.4294
	2.25318	2.23688	-7.2305	3.23961				2.25318	0.926971	16.4528	-14.576				-40.7191	11.4331	-7.73757	18.5888				-40.7191	31.428	7.11425	23.0709
	3.27614	0.141622	-9.71005	3.92829				3.27614	1.3699	16.3449	-14.5645				-43.454	11.1344	-8.78515	19.0246				-43.454	32.0767	7.05133	23.6925
	0.660202	-1.29515	-11.3277	4.35579				0.660202	1.90047	16.0201	-14.1473				-42.5336	12.5705	-7.08922	18.9137				-42.5336	32.2352	7.19288	23.698
	3.2327	-2.17668	-12.2061	4.5384				3.2327	2.52099	15.4569	-13.3267				-41.9274	14.2616	-5.01938	18.7599				-41.9274	32.3527	7.34938	23.6549
	1.56941	-3.06429	-13.0732	4.71677				1.56941	3.10679	14.8944	-12.5511				-42.1935	16.0188	-2.86142	18.6103				-42.1935	32.4645	7.50033	23.613
	4.89988	-0.709806	-4.31252	6.2786				4.89988	3.88753	11.4022	-8.45816				-43.6404	18.0896	-0.437424	18.5473				-43.6404	32.6751	7.47177	23.83
	5.73685	-0.978992	-4.5595	6.04064				5.73685	4.14603	11.7539	-7.76596				-44.0729	20.4005	2.18417	18.5586				-44.0729	32.9611	7.29172	24.2592
	5.8829	-1.24398	-4.79998	5.80887				5.8829	4.39318	12.097	-7.0895				-44.5654	22.7577	4.86822	18.5695				-44.5654	33.2342	7.11368	24.6769
	2.55836	-1.51879	-5.0467	5.57094				2.55836	4.64218	12.4496	-6.39286				-44.4032	24.8107	7.22197	18.5312				-44.4032	33.5194	6.95137	25.1048
	5.37559	-1.4912	-5.39151	5.47713				5.37559	4.34866	12.7982	-6.05069				-42.9807	24.709	7.16426	18.248				-42.9807	33.8566	6.89702	25.5398
	0.777162	-1.45444	-5.72934	5.38691				0.777162	4.04741	13.1379	-5.72933				-43.9253	24.5082	7.02227	17.6486				-43.9253	34.5145	6.79756	26.4061
	-0.96807	-1.4151	-6.07598	5.29116				-0.96807	3.73732	13.4873	-5.401				-35.9467	24.327	10.7449	15.5937				-35.9467	28.2059	6.71141	20.5015
	-2.65708	-0.266103	-4.95229	5.33841				-2.65708	3.56595	13.9756	-5.23632				-37.1298	28.418	16.0494	14.8511				-37.1298	27.1159	6.81981	19.4617
	-3.37862	1.58542	-2.83789	5.47763				-3.37862	3.49092	14.5453	-5.1904				-34.7736	32.8383	21.409	14.0407				-34.7736	26.0201	6.93732	18.4129
	-4.6374	3.46597	-0.626051	5.61494				-4.6374	3.41263	15.129	-5.15118				-35.7302	34.0095	23.0863	13.3993				-35.7302	25.2738	6.96931	17.7401
	-11.0473	11.5058	10.4061	6.79704				-11.0473	6.86642	16.9426	-9.50641				-34.689	31.1956	20.5635	12.9797				-34.689	24.9006	6.89461	17.4781
	-11.6568	12.7268	11.7804	6.49997				-11.6568	6.38871	16.9239	-9.88442				-33.1023	28.4106	18.0967	12.5599				-33.1023	24.5271	6.81934	17.2157
	-11.049	13.9365	13.1864	6.19507				-11.049	5.9014	16.9053	-10.2705				-33.9234	25.8349	15.8414	12.1698				-33.9234	24.175	6.7408	16.9762
	-14.3625	15.1033	14.5877	5.89052				-14.3625	5.41724	16.8874	-10.6546				-33.022	24.6459	14.7813	12.0228				-33.022	23.9793	6.60616	16.9477
	-12.8537	12.9695	11.3593	5.83303				-12.8537	5.881	17.2127	-10.6819				-30.4674	23.4635	13.7316	11.8755				-30.4674	23.7815	6.46928	16.9195
	-11.3356	10.6369	7.86817	5.79528				-11.3356	6.42152	17.566	-10.6807				-30.7048	22.2905	12.6948	11.7283				-30.7048	23.5818	6.33045	16.8918
	-11.105	8.43287	4.57601	5.75844				-11.105	6.9484	17.9103	-10.6796				-31.4208	24.0383	14.2924	11.8832				-31.4208	23.6125	6.35297	16.9143
	-14.2055	6.192	1.19254	5.73367				-14.2055	6.73559	17.8112	-10.8525				-32.5587	27.074	17.0583	12.1633				-32.5587	23.7367	6.44163	16.9578
	-13.1328	4.00594	-2.17258	5.71966				-13.1328	5.89897	17.3415	-11.1703				-32.842	30.1706	19.8877	12.4417				-32.842	23.8606	6.53037	17.0015
	-9.78757	1.96915	-5.36265	5.70597				-9.78757	5.07569	16.884	-11.4836				-32.903	32.0411	21.4615	12.822				-32.903	24.1014	6.59747	17.1511
	-7.98558	0.305065	-8.12605	5.55444				-7.98558	4.27691	16.3779	-11.8551				-34.2989	31.4287	20.4268	13.4286				-34.2989	24.6034	6.62588	17.5315
	-7.50937	0.222086	-8.8558	4.74696				-7.50937	3.71771	15.6876	-12.453				-34.3553	30.8402	19.3601	14.0098				-34.3553	25.1052	6.65628	17.9112
	-5.34133	0.140763	-9.56666	3.96384				-5.34133	3.16651	15.0146	-13.0335				-34.4556	30.2879	18.2859	14.5531				-34.4556	25.5958	6.68792	18.282
	-4.1086	0.0571426	-10.2932	3.16709				-4.1086	2.59645	14.326	-13.625				-34.5835	26.7446	15.5522	13.5082				-34.5835	25.71	6.62923	18.4356
	-0.516573	-2.4252	-14.5774	2.7079				-0.516573	1.95668	14.1589	-13.9476				-33.8052	23.0376	12.7828	12.3667				-33.8052	25.8003	6.56463	18.5756
	-0.417904	-5.25887	-19.544	2.34522				-0.417904	1.30789	14.127	-14.2018				-34.4171	19.4485	10.1498	11.2528				-34.4171	25.8881	6.5013	18.7124
	-0.749374	-7.9342	-24.5707	1.97573				-0.749374	0.634504	14.0949	-14.4694				-34.5466	17.1824	8.41058	10.6475				-34.5466	25.9584	6.42824	18.8428
	0.35606	-9.74482	-28.2898	1.87467				0.35606	0.269657	14.1809	-14.8581				-34.1955	15.9788	7.36945	10.4506				-34.1955	26.0135	6.34866	18.9659
	-1.46475	-10.5436	-30.1478	2.13907				-1.46475	0.340442	14.4253	-15.3991				-35.2954	14.8163	6.36834	10.2585				-35.2954	26.0666	6.27076	19.086
	-1.37276	-11.2671	-32.0527	2.41003				-1.37276	0.411018	14.6753	-15.9571				-33.7824	14.0971	5.85541	10.0258				-33.7824	26.0928	6.16084	19.2129
	-6.31404	-3.39331	-8.32117	8.32522				-6.31404	6.04293	16.9278	-7.8218				-31.5322	15.3863	7.51912	9.63825				-31.5322	25.9974	5.92038	19.357
	-7.98676	-7.466	-12.0612	9.76615				-7.98676	6.73056	16.6126	-7.4723				-34.064	16.6906	9.19027	9.26034				-34.064	25.8995	5.68318	19.4972
	-5.49803	-11.4452	-15.5544	11.1596				-5.49803	7.39743	16.2982	-7.1489				-33.5509	18.0775	10.9543	8.87214				-33.5509	25.7939	5.43676	19.641
	-6.94058	-12.9942	-16.2609	11.8712				-6.94058	7.6777	16.0194	-6.93186				-32.7821	17.5704	10.2345	9.00959				-32.7821	25.7033	5.32458	19.6686
	-5.31036	-11.7788	-13.9256	11.8663				-5.31036	7.54011	15.7665	-6.80549				-34.1822	16.6555	8.95104	9.25818				-34.1822	25.619	5.24676	19.6686
	-5.45099	-10.4621	-11.5651	11.8586				-5.45099	7.40349	15.5138	-6.68024				-33.7967	15.7433	7.63156	9.50552				-33.7967	25.532	5.16655	19.6686
	-8.63423	-9.13786	-9.32932	11.8446				-8.63423	7.24774	15.2435	-6.57752				-33.791	15.143	6.28872	10.1559				-33.791	25.7321	5.04388	19.959
	-4.20622	-8.44468	-8.30178	11.7847				-4.20622	6.8086	14.6821	-6.70205				-32.5985	14.9668	4.97544	11.3206				-32.5985	26.295	4.88879	20.6161
	-5.52469	-7.73266	-7.26342	11.7247				-5.52469	6.37028	14.1204	-6.82683				-32.2821	14.8366	3.66937	12.5155				-32.2821	26.8664	4.75748	21.2872
	-5.20529	-7.0032	-6.21582	11.6645				-5.20529	5.93367	13.5596	-6.95158				-34.9419	14.8002	2.48412	13.6699				-34.9419	27.4329	4.66859	21.9413
	-4.89734	-8.17607	-7.66506	11.9197				-4.89734	5.95582	13.4844	-7.04381				-34.4297	15.5432	2.71093	14.0653				-34.4297	27.9893	4.84728	22.3321
	-6.62698	-10.0664	-10.1135	12.3116				-6.62698	6.16302	13.6017	-7.12603				-34.8821	16.3048	2.94489	14.4637				-34.8821	28.5586	5.03708	22.7318
	-6.70497	-11.8488	-12.5027	12.7051				-6.70497	6.37074	13.7192	-7.20818				-34.1789	17.0669	3.18035	14.855				-34.1789	29.1271	5.2336	23.1306
	-6.36945	-12.5808	-14.0174	12.7089				-6.36945	6.5202	13.956	-7.25341				-32.6986	18.4447	0.304674	17.7818				-32.6986	23.1283	5.93998	16.8285
	-5.81522	-11.3883	-13.9138	11.8871				-5.81522	6.55916	14.4579	-7.22843				-33.438	18.8166	0.87199	17.6964				-33.438	23.1678	5.72031	17.067
	-6.14433	-10.2143	-13.7971	11.0436				-6.14433	6.59821	14.9603	-7.20788				-32.8861	19.1846	1.4299	17.6128				-32.8861	23.2011	5.50147	17.3004
	-5.12176	-9.08358	-13.669	10.198				-5.12176	6.63647	15.4522	-7.19206				-32.6117	19.5408	1.98248	17.5211				-32.6117	23.2313	5.27605	17.5384
	-5.3945	-7.90045	-11.2509	9.7036				-5.3945	6.40797	15.362	-7.25692				-32.1583	17.3369	0.263701	16.8435				-32.1583	23.4146	5.36642	17.6148
	-4.90119	-6.51313	-8.63624	9.22642				-4.90119	6.16201	15.2353	-7.32706				-31.4767	15.2225	-1.35598	16.1826				-31.4767	23.5932	5.45401	17.6894
	-5.62184	-4.96841	-6.01885	8.75444				-5.62184	5.92084	15.1116	-7.39598				-33.0138	13.0988	-2.95172	15.506				-33.0138	23.7756	5.54308	17.7658
	-4.78835	-3.75574	-4.20197	8.48371				-4.78835	5.65382	14.9671	-7.45951				-32.5031	13.3132	-2.30333	15.2541				-32.5031	24.2175	5.42779	18.238
	-4.09676	-2.91034	-3.07254	8.37876				-4.09676	5.37105	14.8088	-7.51773				-32.2493	14.8858	-0.375485	15.2463				-32.2493	24.7885	5.20636	18.933
	-3.06321	-2.06505	-1.95784	8.27623				-3.06321	5.09457	14.6544	-7.57485				-31.8955	16.566	1.65863	15.2357				-31.8955	25.364	4.98797	19.6572
	-1.16188	-1.67034	-1.42324	8.13171				-1.16188	4.72141	14.4242	-7.63637				-34.2966	17.9844	3.48958	15.0954				-34.2966	25.7988	4.86822	20.182
	-1.83417	-3.37707	-3.53387	7.81779				-1.83417	3.96341	13.8841	-7.71001				-34.5611	18.4661	4.56952	14.5917				-34.5611	25.8431	5.01457	20.0921
	-3.3694	-5.02787	-5.56014	7.51273				-3.3694	3.22597	13.3596	-7.78211				-35.0577	18.9816	5.69107	14.0784				-35.0577	25.8867	5.16725	20.0009
	-4.74003	-6.71082	-7.61183	7.20034				-4.74003	2.47008	12.8229	-7.85647				-33.939	19.5225	6.83402	13.5646				-33.939	25.9287	5.32361	19.91
	-3.53767	-6.01653	-7.34884	6.75576				-3.53767	2.14629	12.5726	-7.87083				-34.2328	18.1008	5.33643	13.418				-34.2328	25.8559	5.19653	19.9925
	-1.43487	-4.79031	-6.54296	6.2887				-1.43487	1.93186	12.3955	-7.87083				-34.8109	16.4008	3.45302	13.3189				-34.8109	25.7623	5.02307	20.1027
	-2.24287	-3.52862	-5.69469	5.8045				-2.24287	1.71211	12.214	-7.87084				-35.1518	14.7489	1.60864	13.218				-35.1518	25.666	4.84741	20.2136
	-3.95946	-2.07257	-4.40747	5.80434				-3.95946	1.28327	12.3476	-7.79754				-35.4037	14.1161	0.927623	13.1344				-35.4037	25.6828	4.77589	20.3121
	-5.953	-0.432693	-2.59289	6.43328				-5.953	0.587066	12.8855	-7.64278				-33.8039	14.477	1.39529	13.0658				-33.8039	25.8204	4.8109	20.4021
	-3.13918	1.20388	-0.713341	7.07702				-3.13918	-0.13659	13.437	-7.50081				-35.381	14.8419	1.86743	12.9972				-35.381	25.9579	4.84583	20.492
	-5.20462	2.7027	1.03935	7.66493				-5.20462	-0.818861	14.0117	-7.37378				-35.6221	15.3778	2.50291	12.9675				-35.6221	26.1509	4.87262	20.6379
	-5.42527	2.55834	0.190963	7.27156				-5.42527	-0.59016	14.9791	-7.22637				-38.9703	17.604	4.77908	13.2804				-38.9703	26.8959	4.8352	21.3276
	-7.06065	2.41654	-0.676934	6.86079				-7.06065	-0.353549	15.9705	-7.08176				-36.6725	19.8887	7.10436	13.5903				-36.6725	27.6372	4.80062	22.0114
	-8.46651	2.28101	-1.54366	6.4421				-8.46651	-0.114594	16.9623	-6.94368				-38.271	22.1699	9.41664	13.8899				-38.271	28.3571	4.76958	22.6731
	-12.6885	5.20638	-1.21912	4.34414				-12.6885	5.43093	17.8231	-3.01658				-42.6818	23.4347	8.10107	16.5005				-42.6818	30.2069	8.23885	22.287
	-11.0833	4.72432	-1.83832	4.40499				-11.0833	4.66275	17.1005	-3.32452				-42.7267	25.0579	10.7209	15.89				-42.7267	30.0199	8.03335	22.4644
	-11.4269	4.25531	-2.43826	4.46412				-11.4269	3.91137	16.3969	-3.62461				-40.1934	26.8163	13.4466	15.2574				-40.1934	29.8202	7.81657	22.6481
	-10.7841	3.79345	-3.02025	4.52306				-10.7841	3.15018	15.6874	-3.92874				-42.9687	28.4729	15.9674	14.6398				-42.9687	29.584	7.62275	22.7663
	-10.8511	5.07328	-0.780882	4.44664				-10.8511	3.37753	15.9432	-3.95355				-42.379	27.9097	15.701	14.2845				-42.379	29.0274	7.75976	22.1165
	-11.0227	6.40935	1.44655	4.3676				-11.0227	3.60027	16.1932	-3.97791				-42.3511	27.3311	15.4279	13.9199				-42.3511	28.451	7.89921	21.4474
	-10.2229	7.86566	3.77288	4.2821				-10.2229	3.82927	16.4496	-4.00299				-42.0913	26.7509	15.1547	13.555				-42.0913	27.8686	8.03774	20.7748
	-11.8018	7.21778	3.14542	4.44694				-11.8018	3.2994	15.7	-4.74115				-41.9584	26.9254	15.8252	13.1693				-41.9584	27.3373	8.04001	20.3314
	-11.2775	5.39815	0.896356	4.75109				-11.2775	2.34049	14.4	-5.85578				-37.8511	27.455	16.9146	12.7415				-37.8511	26.8089	7.98249	19.9709
	-10.6163	3.58244	-1.34298	5.06238				-10.6163	1.34354	13.0703	-6.98538				-37.1484	28.0044	17.9782	12.2927				-37.1484	26.2802	7.92455	19.6091
	-7.66366	1.98529	-3.31335	5.25214				-7.66366	0.69837	12.086	-7.85703				-37.3864	27.5269	17.9067	11.852				-37.3864	25.7264	7.76273	19.2746
	-7.99763	0.922659	-4.61431	5.08872				-7.99763	1.11533	12.1106	-8.00011				-39.3488	24.6819	15.3506	11.4338				-39.3488	25.0681	7.35065	18.9775
	-5.98175	-0.170029	-5.92747	4.92083				-5.98175	1.54096	12.1363	-8.1464				-40.3456	21.8821	12.8519	11.0158				-40.3456	24.4025	6.93304	18.6804
	-5.08402	-1.27331	-7.22955	4.7514				-5.08402	1.96764	12.1628	-8.29326				-41.2728	19.1981	10.4733	10.6079				-41.2728	23.7461	6.52014	18.3903
	-4.47431	-0.131959	-5.82231	4.47948				-4.47431	1.54399	11.6324	-8.50173				-39.7894	20.4597	12.2686	10.1366				-39.7894	23.5245	6.50376	18.1369
	-3.55506	1.40398	-3.95183	4.18654				-3.55506	0.987933	11.0092	-8.7237				-35.5607	22.122	14.4379	9.65392				-35.5607	23.3406	6.52189	17.8877
	-1.12488	2.9853	-2.03704	3.89415				-1.12488	0.432699	10.3871	-8.94498				-36.1433	23.8092	16.5752	9.17587				-36.1433	23.1606	6.53979	17.6448
	0.363804	3.57062	-1.36445	3.72527				0.363804	0.179673	10.1245	-9.07657				-38.5577	24.4424	17.1438	9.25009				-38.5577	23.126	6.49994	17.6279
	-0.590966	3.11359	-1.98619	3.67613				-0.590966	0.228239	10.2226	-9.12197				-38.7097	24.1286	16.3343	9.79668				-38.7097	23.2167	6.41075	17.8054
	-0.539713	2.6584	-2.60485	3.62703				-0.539713	0.27694	10.3206	-9.16752				-36.4262	23.836	15.5342	10.3248				-36.4262	23.3045	6.32305	17.979
	-2.32136	2.07924	-3.37024	3.62316				-2.32136	0.280459	10.4309	-9.23298				-37.3478	23.3095	14.4936	10.8232				-37.3478	23.4958	6.19524	18.263
	-1.73828	0.254204	-5.65677	4.02794				-1.73828	-0.128955	10.681	-9.50081				-37.7046	21.608	12.3837	11.1504				-37.7046	24.194	5.87992	19.0784
	-0.484328	-1.48483	-7.877	4.43411				-0.484328	-0.545841	10.9308	-9.77927				-37.8639	19.9998	10.3467	11.4665				-37.8639	24.8678	5.5753	19.8705
	0.493883	-3.09986	-9.9855	4.83193				0.493883	-0.96019	11.1743	-10.0614				-38.0177	18.4155	8.29449	11.7856				-38.0177	25.5469	5.26782	20.6745
	3.58722	-1.07343	-8.38242	5.7199				3.58722	7.30501	12.7783	-12.8331				-42.124	19.4004	9.21309	11.8749				-42.124	25.8768	5.18245	20.9347
	6.2192	-3.14892	-10.5742	6.08874				6.2192	6.35667	11.6733	-13.1886				-38.0476	21.05	10.9112	11.9038				-38.0476	26.1116	5.15891	21.051
	4.77821	-5.27526	-12.7548	6.45302				4.77821	5.38906	10.5446	-13.5501				-40.5177	22.7694	12.6857	11.9331				-40.5177	26.3516	5.13884	21.1705
	8.25487	-7.2365	-14.6925	6.76552				8.25487	4.55887	9.53629	-13.8477				-40.8912	24.3515	14.0731	12.2144				-40.8912	26.7741	5.19181	21.3972
	8.96807	-7.26338	-14.4751	6.63253				8.96807	5.25372	9.87915	-13.4465				-41.7408	25.6692	14.8567	12.8357				-41.7408	27.4359	5.33935	21.7635
	7.64402	-7.28635	-14.2514	6.49554				7.64402	5.95592	10.2317	-13.0405				-42.1537	27.0238	15.6696	13.4752				-42.1537	28.1153	5.49092	22.1386
	7.86459	-7.30479	-14.0269	6.35778				7.86459	6.64841	10.5854	-12.6392				-42.2808	28.2276	16.3174	14.1248				-42.2808	28.7906	5.64438	22.5082
	9.54195	-8.01242	-14.0724	6.85822				9.54195	6.76731	10.4108	-12.4651				-42.9373	25.6207	12.5215	15.0348				-42.9373	29.4051	5.85575	22.7852
	8.63818	-9.06182	-14.2252	7.64659				8.63818	6.64301	9.99765	-12.3849				-43.4962	23.1367	8.73773	15.9649				-43.4962	30.033	6.06924	23.0686
	8.49886	-10.1236	-14.363	8.42044				8.49886	6.51974	9.58491	-12.3078				-44.5724	20.8543	5.08582	16.8907				-44.5724	30.6578	6.27905	23.3509
	8.23847	-10.4053	-13.762	8.86383				8.23847	6.16947	9.07425	-12.1959				-43.3075	19.5596	2.64642	18.0836				-43.3075	32.6277	7.15418	24.2903
	9.772	-8.85875	-11.4473	8.6243				9.772	5.2846	8.30382	-11.9915				-43.6599	15.1318	1.34007	12.9905				-43.6599	28.8681	6.73544	22.3235
	8.75322	-7.21291	-9.08962	8.38474				8.75322	4.41169	7.5376	-11.7876				-43.0175	18.181	4.67727	13.2072				-43.0175	28.8901	6.45462	22.5933
	9.22214	-5.51111	-6.74065	8.15082				9.22214	3.57089	6.79367	-11.5891				-44.7121	20.4574	10.2692	10.4986				-44.7121	28.6234	5.80109	23.7063
	8.12677	-7.22852	-8.1289	8.49655				8.12677	3.71254	6.96193	-11.3623				-43.6575	18.8464	9.83929	9.10647				-43.6575	28.514	5.48592	24.1711
	7.32412	-9.23479	-9.79279	8.88236				7.32412	3.93679	7.2082	-11.1332				-39.5046	19.6735	11.3402	8.53127				-39.5046	28.4419	5.43929	24.1849
	8.73834	-11.1894	-11.375	9.24991				8.73834	4.15469	7.44878	-10.9093				-41.0521	20.5143	12.8249	7.97055				-41.0521	28.3714	5.39364	24.1983
	8.97114	-11.5641	-11.9509	9.23248				8.97114	4.08916	7.43517	-10.8677				-41.3523	21.0329	13.8931	7.45159				-41.3523	28.3118	5.28331	24.2701
	7.65485	-10.5829	-11.6686	8.8818				7.65485	3.78125	7.20331	-10.9841				-40.6222	19.9889	12.9929	7.16198				-40.6222	28.3008	4.90496	24.5842
	7.16466	-9.63465	-11.3852	8.52854				7.16466	3.47934	6.97673	-11.0982				-40.8287	18.9741	12.1171	6.87888				-40.8287	28.2818	4.53264	24.89
	12.5171	-8.54003	-10.8573	8.17078				12.5171	3.0628	6.75665	-11.2298				-41.292	17.9391	11.2231	6.58849				-41.292	28.2542	4.14826	25.2022
	9.20276	-6.74506	-9.14844	7.87078				9.20276	2.09668	6.59208	-11.4451				-41.2185	21.3598	15.0054	6.48942				-41.2185	28.2089	4.00573	25.3057
	8.06079	-4.97353	-7.43762	7.57275				8.06079	1.13502	6.43348	-11.669				-41.7561	25.8626	19.8742	6.43504				-41.7561	28.1614	3.9201	25.3608
	8.66252	-3.14514	-5.64542	7.26336				8.66252	0.134826	6.27367	-11.9118				-41.1322	30.654	24.9936	6.37934				-41.1322	28.1124	3.83208	25.4172
	12.8678	-3.85944	-6.78289	7.14673				12.8678	-0.0580828	6.62165	-11.8151				-41.1922	32.8394	27.3117	6.29293				-41.1922	28.2227	3.61903	25.7356
	7.91228	-5.1877	-8.63812	7.08276				7.91228	-0.0362293	7.09429	-11.6306				-39.8932	31.5375	25.938	6.1671				-39.8932	28.5234	3.2517	26.3741
	7.83908	-6.51027	-10.5102	7.01729				7.83908	-0.0138677	7.57827	-11.4422				-42.0517	30.2137	24.5277	6.03424				-42.0517	28.8194	2.87236	27.0246
	5.47596	-7.36471	-11.9467	7.03027				5.47596	0.133318	8.21936	-11.3153				-41.9446	28.9227	23.1517	5.88832				-41.9446	29.0583	2.49839	27.6147
	6.74372	-7.57481	-12.7694	7.14812				6.74372	0.451018	9.06025	-11.2788				-40.2802	28.0103	22.3774	5.60333				-40.2802	28.5907	2.2617	27.3134
	4.62593	-7.76514	-13.6121	7.26526				4.62593	0.781862	9.92672	-11.246				-40.411	27.079	21.586	5.31143				-40.411	28.1122	2.02092	27.0057
	5.70973	-7.81301	-14.3029	7.36819				5.70973	1.12441	10.7971	-11.2168				-41.2188	26.151	20.7964	5.0196				-41.2188	27.6339	1.78187	26.699
	1.08671	-4.82197	-11.0514	7.19826				1.08671	1.67956	11.752	-11.1587				-42.8671	25.2663	20.0156	4.73158				-42.8671	28.1525	1.76878	27.3849
	0.630836	-1.74845	-7.59854	7.00531				0.630836	2.25674	12.7345	-11.1019				-41.7445	24.3754	19.212	4.43473				-41.7445	29.1622	1.87368	28.5731
	-3.22567	1.33111	-4.00828	6.79326				-3.22567	2.84149	13.7192	-11.048				-41.7441	23.4865	18.4062	4.13599				-41.7441	30.1647	1.99059	29.7642
[truncated: 164,194 more rows]
