# Supplementary material for: Visual pursuit behavior in mice maintains the pursued prey on the retinal region with least optic flow
Source: eLife. 2021 Oct 26;10:e70838. doi: 10.7554/eLife.70838 (PMC8547958; doi:10.7554/eLife.70838)
Supplement: Figure 5—source data 1. [file elife-70838-fig5-data1.xlsx]

## Sheet: 5A
Non-tracking - Left eye				Non-tracking - Right eye					Tracking - Left eye				Tracking - Right eye
X	Y	Euc Dist	N	X	Y	Euc Dist	N		X	Y	Euc Dist	N	X	Y	Euc Dist	N
-88.2258	7.74074	41.31	8721	-87.1113	0.669684	43.5033	6529		3.37354	36.7562	37.349	5148	-82.4654	9.13884	16.6962	4986
-84.095	6.58744	41.1677		-83.6638	2.61251	43.4773			2.82927	33.346	37.386		-72.6449	12.3493	16.7831
-81.9236	5.33181	40.994		-78.1604	5.11446	43.4937			-0.160603	35.469	36.9069		-67.5571	16.734	16.6598
-78.9267	4.91143	40.8123		-79.0138	3.03394	43.5142			-0.468979	34.7711	36.933		-63.8236	19.3307	16.6104
-72.8636	2.05286	40.9135		-79.4711	1.45972	43.4557			-4.68527	34.1271	36.7989		-59.2795	24.4733	16.3601
-70.0555	5.97781	40.7411		-84.0898	2.51563	43.0873			-9.41236	35.4399	36.4847		-56.4943	24.2384	16.4598
-65.4407	2.50946	40.7695		-83.8261	1.6086	43.2268			-11.0375	36.7459	36.2692		-57.8104	26.9274	16.336
-62.2275	12.6563	40.4121		-88.1093	-0.359386	43.0735			-14.6705	32.4955	36.2591		-60.9225	26.8169	16.2267
-55.6871	19.3774	40.2322		-86.8008	-17.367	103.13			-13.6811	34.3495	36.1003		-66.2015	28.7664	15.9036
-47.6746	25.3195	40.0561		-85.9812	-16.3746	103.118			-16.3238	30.735	36.0561		-66.333	27.0768	16.0469
-61.7713	-48.3189	42.6676		-85.8126	-15.9239	103.118			-19.2168	32.7113	35.7076		-68.7228	31.161	15.7692
-50.5693	-60.893	42.9499		-86.4802	-16.0667	103.105			-19.7075	31.2229	35.6665		-70.7433	28.9509	15.8699
-40.9756	-71.9359	42.8353		-85.8094	-18.1746	103.137			-21.0064	30.0877	35.4993		-72.5897	30.2323	15.6914
-31.2041	-73.0763	43.3049		-86.0524	-16.9645	103.108			-21.1101	29.3574	35.3714		-70.0781	28.3159	15.7941
-33.6029	-72.4394	43.3145		-85.9909	-16.7045	103.109			-21.3981	31.0566	35.1649		-71.9475	29.3364	15.5735
-38.7556	-65.5866	43.3277		-85.897	-16.3395	103.107			-22.6877	25.5599	35.1991		-73.3298	26.6022	15.5563
-35.5734	-65.8711	43.4583		-86.7789	-16.5996	103.085			-23.8627	28.1493	34.8926		-72.599	27.3566	15.4895
-36.4032	-67.3772	43.2817		-87.0637	-18.4903	103.088			-22.3646	26.8258	34.9072		-70.7176	26.3208	15.422
-31.4955	-69.0812	43.4864		-86.1975	-19.7429	103.098			-22.1087	28.8138	34.7141		-70.1709	28.6467	15.2435
-29.6744	-69.6594	43.5798		-86.6407	-18.1323	103.053			-23.4484	30.0542	34.4732		-69.7027	29.9848	15.1811
-37.9846	-64.3922	43.4997		-86.2691	-17.8065	103.065			-24.0438	28.3709	34.4049		-68.5626	30.0487	15.0666
-41.0141	-62.6163	43.6502		-87.4954	-16.2338	102.989			-23.1418	24.0977	34.5476		-68.0819	31.7669	14.9652
-44.8318	-60.3031	43.6811		-86.8339	-15.0552	103.054			-27.1024	25.569	34.1574		-68.4768	29.8207	14.9757
-55.7827	-46.8048	43.7498		-86.7983	-18.395	103.062			-28.9403	24.3254	34.0112		-67.6803	31.8641	14.8129
-59.484	-39.0666	43.8914		-87.651	-18.6987	103.042			-26.588	22.9194	34.0469		-67.5895	32.1696	14.7266
-63.6565	-28.3598	43.845		-87.1645	-20.4732	103.088			-23.9456	26.1263	33.9443		-66.7192	32.2723	14.633
-63.6665	-29.6448	43.957		-86.074	-20.5525	103.158			-22.0629	29.9867	33.7637		-65.9774	34.3522	14.4227
-63.0001	-38.7365	43.9609		-86.292	-21.1559	103.106			-23.2588	28.8754	33.5419		-66.6768	34.263	14.4173
-56.1198	-51.5195	44.1696		-85.6013	-22.1794	103.201			-25.8901	26.4892	33.4538		-65.3392	36.502	14.2047
-53.463	-58.3714	44.1596		-86.1923	-20.0645	103.099			-26.0331	24.7339	33.4083		-65.3136	33.8454	14.1548
-58.7509	-53.2277	44.0934		-85.6469	-19.7478	103.096			-28.2697	20.168	33.2988		-65.2292	34.064	14.1474
-61.2332	-49.71	44.1108		-85.4459	-18.6937	103.654			-29.7717	21.9069	33.0544		-64.0439	37.0689	13.8423
-63.7453	-47.5582	44.1214		-85.6504	-18.8313	103.709			-30.6263	21.5507	32.8863		-63.9858	35.4661	13.8209
-59.7512	-52.867	44.0745		-85.3792	-19.6241	103.763			-31.3195	23.4142	32.6802		-65.0509	36.1616	13.686
-50.441	-60.0957	44.2602		-85.0999	-19.4681	103.784			-29.8906	24.4777	32.5464		-63.6576	34.5287	13.4868
-46.2203	-64.9201	44.0992		-84.9052	-22.5353	103.883			-29.3058	24.7313	32.4176		-64.2808	36.2937	13.316
-40.4534	-67.891	44.2432		-85.9181	-19.3467	103.772			-28.7295	28.2615	32.1682		-63.5197	35.4435	13.1505
-45.5011	-64.2377	44.2528		-85.1906	-18.8179	103.771			-28.4802	25.6857	32.0617		-65.0435	36.0556	13.179
-51.1803	-59.1559	44.222		-87.2749	-18.2392	103.68			-28.4038	25.8601	31.9693		-65.1414	38.6571	12.9721
-55.6982	-55.8442	44.2329		-86.4232	-19.8116	103.549			-27.8482	24.2251	31.8558		-66.2833	38.2775	12.9011
-61.3202	-44.8018	44.2035		-84.9898	-19.6604	103.609			-28.2205	23.474	31.827		-66.7013	37.5088	12.7186
-67.6197	-39.4873	44.1616		-85.4303	-19.4068	103.585			-29.8032	22.0337	31.6946		-67.6809	35.9598	12.5943
-70.9329	-32.2542	44.1973		-86.3311	-21.291	103.549			-30.1643	22.9645	31.5724		-68.6845	33.2279	12.5317
-69.5961	-32.183	44.1984		-84.7254	-19.5659	103.536			-31.3012	21.4643	31.507		-67.7174	34.2207	12.3429
-65.2958	-39.7565	44.32		-84.9343	-19.7121	103.774			-31.3945	21.4721	31.3805		-67.3463	32.5375	12.3697
-64.6221	-42.6866	44.2182		-84.9843	-20.5424	103.725			-32.1484	25.2992	31.034		-66.476	34.32	12.1536
-62.9856	-45.0347	44.1495		-85.2808	-20.998	103.578			-30.157	25.1336	31.081		-64.3445	31.9948	12.1144
-63.1206	-45.9437	44.208		-86.9051	-20.1323	103.465			-32.0028	24.2691	30.9134		-66.4755	32.0705	11.9111
-62.1	-48.5357	44.274		-87.579	-20.2388	103.294			-32.1533	21.0796	30.9253		-66.6009	32.9315	11.6875
-60.8773	-50.4433	44.3385		-86.7751	-22.7961	103.459			-32.9343	19.9365	30.7346		-68.0863	32.3649	11.5168
-60.6607	-50.3851	44.3718		-85.5346	-25.6582	102.918			-35.405	18.0037	30.5088		-66.3548	29.7832	11.6209
-63.4646	-47.7617	44.1645		-85.7589	-24.3369	103.121			-33.9964	19.1328	30.3297		-67.9165	31.8235	11.3455
-64.2654	-47.8308	44.127		-86.1106	-22.8802	103.406			-32.5363	25.7442	30.1621		-68.2686	30.5242	11.2998
-55.7032	-4.77529	44.4394		-85.2045	-23.6888	103.611			-28.6668	27.9981	30.1504		-70.0939	31.9805	11.0574
-55.9168	-3.5856	44.4234		-84.2336	-24.7932	103.646			-31.0602	25.6236	30.0361		-70.1044	32.8797	10.8534
-56.4334	0.266382	44.4205		-85.9943	-19.7945	103.386			-30.9343	24.7782	29.9801		-67.9407	32.8605	10.6739
-57.5766	4.35867	44.3619		-86.1169	-19.5306	103.271			-31.3161	24.8132	29.8037		-71.8187	33.0833	10.4867
-59.1241	-1.01764	44.424		-85.5617	-23.8296	103.363			-33.7613	22.2568	29.6389		-72.1648	32.5172	10.2419
-60.3946	-11.372	44.4091		-83.3663	-25.1024	103.467			-32.4838	22.6219	29.5651		-75.1866	30.7818	10.0749
-61.5282	-20.7885	44.4791		-86.624	-22.3545	103.32			-32.4191	22.3221	29.4411		-73.9428	33.2993	9.92158
-60.0651	-26.866	44.5898		-86.6382	-21.9623	103.31			-33.3616	22.7553	29.2112		-76.1194	31.9114	9.89693
-60.0182	-28.4959	44.5669		-86.0266	-22.7082	103.345			-30.2645	23.5351	29.2988		-77.3467	35.3628	9.50505
-60.5228	-31.3641	44.5271		-89.6813	-2.96158	93.3359			-28.4444	27.311	29.0703		-77.4343	35.7577	9.42705
-57.6252	-34.0178	44.7407		-89.0673	-4.799	93.1652			-28.5014	31.4153	28.8171		-3.8321	34.1344	51.0036
-60.8233	-27.393	44.6947		-88.3425	-3.47132	93.0255			-26.8749	28.8338	28.8837		-4.70587	33.1981	51.0039
-63.2122	-22.0716	44.676		-88.1284	-5.99929	92.908			-27.6798	31.4376	28.5266		-5.05525	31.9468	51.0539
-64.5824	-16.9338	44.7448		-88.9041	-7.59884	92.7804			-30.384	29.6027	28.5011		-5.6732	32.0356	51.0078
-64.0666	-12.4384	44.8324		-89.0285	-9.66371	92.8816			-28.9338	29.887	28.3049		-4.58988	34.5338	50.8314
-65.4458	-7.51475	44.7974		-86.7769	-9.09003	92.7659			-25.392	28.0116	28.3772		-6.24432	34.7969	50.8362
-65.3422	-4.16221	44.8657		-87.624	-7.3551	92.6731			-24.8231	29.2369	28.0556		-4.48784	32.8942	50.8777
-64.4262	-2.90075	44.8944		-89.2307	-0.761287	91.6099			-22.077	31.3267	27.7865		-4.81275	34.1911	50.8061
-66.3228	-8.52735	44.7921		-85.3497	-0.472101	91.8483			-22.4489	29.8363	27.5974		-3.97679	33.813	50.7494
-64.439	-16.745	44.914		-78.1432	4.68649	91.6911			-20.5681	29.1816	27.4676		-3.47872	35.9138	50.5986
-62.4399	-23.4422	44.9452		-77.9918	2.266	91.6866			-21.7561	31.3205	26.8738		-3.31655	35.9077	50.5699
-60.7646	-28.2948	44.9596		-73.5009	2.28189	91.7668			-20.5587	26.7963	27.1128		-2.99386	35.4361	50.6096
-57.6375	-35.5536	45.1619		-69.3502	5.31847	91.5718			-23.2825	26.2665	26.8334		-4.95611	37.1399	50.5075
-56.3209	-40.3638	45.1263		-63.7012	8.46715	91.6227			-25.6414	25.6365	26.5751		-3.24557	35.8281	50.5187
-55.4218	-40.0949	45.2092		-66.8123	-1.8322	92.0691			-26.5256	22.842	26.5074		-2.9351	37.0822	50.3921
-60.0686	-32.2579	45.185		-67.715	6.64399	91.5484			-28.7869	23.6701	26.2357		-2.5107	35.5815	50.3285
-63.0936	-23.3205	45.1528		-69.866	0.923035	91.8281			-28.1043	23.1216	26.1005		-1.37887	34.6528	50.3571
-65.9859	-17.0339	45.1836		-68.9825	5.79191	91.5385			-27.5074	22.5747	26.0713		-3.45547	35.6765	50.2791
-65.5871	-19.0265	45.2264		-70.302	-0.180809	92.0321			-30.1481	22.1293	25.8502		-1.72871	37.2026	50.0687
-66.0047	-15.3395	45.1048		-72.0186	1.87439	91.8374			-30.0609	21.6845	25.708		-4.25426	38.393	49.9497
-67.6784	-16.2746	45.101		-70.4697	2.2028	91.7583			-33.6971	21.2006	25.4257		-1.34476	35.6511	49.9878
-66.0914	-19.2659	45.1905		-73.0531	-3.0736	92.0019			-32.5613	21.6357	25.4024		-1.24081	34.9052	49.8766
-66.119	-22.3102	45.0608		-72.3155	3.12233	91.7509			-27.7274	26.1614	25.2833		-3.90406	36.6389	49.7364
-63.9106	-27.6745	45.1185		-72.7006	-1.48897	92.0304			-23.4864	30.0821	25.1631		-0.299996	34.8746	49.5921
-60.6088	-31.3796	45.2595		-71.1317	1.81321	91.7335			-19.9325	29.994	25.1889		-4.55176	38.1485	49.4087
-60.0446	-35.1909	45.285		-73.7747	2.59929	91.9044			-23.0362	31.8008	24.884		-2.0112	36.5416	49.3534
-56.6303	-37.7343	45.4694		-73.2258	-3.06684	92.1346			-26.5808	30.5641	24.6848		-0.495391	37.6417	49.1482
-55.1332	-40.5219	45.5233		-73.4152	3.19718	91.7121			-26.2945	27.6995	24.6975		0.366775	39.5776	48.8914
-58.1367	-40.3931	45.4217		-75.2712	9.0245	91.4553			-27.7395	24.975	24.6846		-3.33549	37.1931	49.1193
-56.2873	-41.9938	45.665		-74.4112	3.80401	91.747			-29.132	27.0583	24.4348		0.338439	34.6621	49.002
-57.4096	-41.5551	45.6809		-74.5689	3.20956	91.7506			-30.3435	22.9579	24.5047		-1.37171	36.6526	48.7341
-59.832	-38.4311	45.7318		-75.801	0.529221	91.9236			-30.6325	20.6608	24.4787		-3.05518	36.5861	48.753
-59.3388	-35.9216	45.8978		-75.9133	0.117458	91.9134			-30.5439	23.6483	24.2504		-5.51728	37.6894	48.5133
-60.8964	-34.9482	45.9527		-75.3962	0.228208	91.8246			-29.6331	27.0503	24.0806		-7.0495	40.116	48.2682
-63.4979	-33.7848	45.9038		-75.2748	-1.21203	91.8243			-28.8093	28.0186	23.9353		-9.87911	39.1561	48.1769
-61.2292	-35.9649	45.9595		-74.5429	-2.73369	91.8329			-29.241	26.4113	23.954		-11.2222	38.7976	48.0913
-59.0618	-37.208	46.0092		-74.0015	-3.39829	91.8332			-26.9189	29.4153	23.8019		-16.3561	39.0445	47.9937
-58.8335	-39.5269	45.9201		-74.7976	-3.00308	91.9032			-26.2957	30.4477	23.6911		-17.1383	40.4818	47.8459
-65.739	-17.3311	46.0118		-75.1928	-0.49313	91.9454			-28.4224	26.6812	23.7269		-19.3857	40.4971	47.7135
-64.3921	5.24294	45.8906		-73.9751	0.157892	91.8576			-27.7913	27.1375	23.5678		-19.3463	40.5831	47.5772
-56.7985	27.2784	45.8817		-72.9477	0.300532	91.7988			-31.0259	26.1226	23.3836		-18.8836	37.5643	47.5879
-51.6394	31.1535	45.9337		-72.8825	1.26131	91.7051			-32.2607	25.2689	23.3984		-20.5201	38.3586	47.3737
-59.8894	13.7687	45.7636		-71.8969	1.45807	91.6691			-34.3954	24.4597	23.207		-19.8429	38.9946	47.162
-58.5942	-9.04613	45.9945		-75.7844	0.742816	91.8717			-35.3844	21.6245	23.2052		-19.5279	37.4796	47.0812
-52.5406	-24.963	45.8758		-73.6422	5.68071	91.5917			-37.9949	20.1048	22.9978		-20.854	36.7586	47.056
-53.724	-23.0797	45.917		-74.2521	7.61031	91.5902			-37.1828	18.0437	23.0118		-19.9851	37.2332	46.89
-54.2578	-20.749	45.9225		-74.506	8.78373	91.5896			-37.8522	20.482	22.8085		-19.8571	36.2216	46.9193
-53.4626	-19.4576	45.9448		-73.7251	7.28265	91.5773			-37.1845	19.6557	22.7537		-20.3922	37.5057	46.5866
-52.7512	-21.0614	45.7719		-70.7461	8.85009	91.5393			-36.1767	19.5266	22.7876		-22.3823	36.0318	46.5222
-50.7187	-25.7608	45.7946		-69.8849	7.98509	91.394			-37.91	19.3163	22.6197		-22.3119	36.0512	46.3722
-48.6226	-30.1144	45.71		-70.4311	2.53148	91.7099			-38.7101	20.8123	22.385		-25.4996	35.5728	46.2787
-45.6127	-34.8514	45.7101		-69.1394	7.83409	91.6349			-37.2688	20.5733	22.4708		-22.5194	35.9959	46.109
-48.4104	-31.6556	45.6322		-68.6407	3.816	91.899			-39.6661	19.6027	22.2441		-25.1336	37.194	45.8977
-50.3813	-31.1654	45.5328		-67.9164	6.274	91.9075			-41.6191	19.0801	22.2485		-23.0684	38.1748	45.699
-50.5183	-29.5726	45.5804		-62.7897	14.1497	91.5493			-44.367	16.362	22.0542		-25.9965	38.9547	45.6676
-52.391	-26.0258	45.6497		-60.126	15.6758	91.6075			-42.8088	17.3577	22.0863		-26.9493	36.2181	45.695
-55.2387	-20.802	45.4987		-57.8072	18.5881	91.6394			-42.5823	19.2753	21.9448		-27.6007	38.2083	45.3805
-57.4849	-16.1504	45.4072		-53.5802	20.0582	91.5116			-40.8535	23.4362	21.9012		-28.6978	38.0587	45.3042
-57.6667	-16.8461	45.4511		-52.2571	21.506	91.4134			-39.2297	21.347	22.0849		-26.8681	38.6895	44.9782
-54.8396	-21.2563	45.5236		-46.8393	18.1706	91.5564			-39.4558	23.9358	21.9199		-29.1154	39.1707	44.9372
-53.632	-26.2452	45.5174		-44.5388	18.4306	91.6405			-40.1787	26.762	21.613		-26.6994	40.3658	44.6455
-52.7983	-31.7188	45.4524		-47.6299	16.2715	91.7841			-40.928	26.5632	21.5828		-26.2662	39.6361	44.7213
-51.0791	-37.314	45.3677		-43.5031	16.5613	91.9149			-40.9649	21.1896	21.7943		-23.1134	40.3705	44.5256
-48.5904	-39.8513	45.4674		-44.7147	19.6119	91.739			-45.7114	20.5382	21.5117		-23.3983	41.1114	44.3754
-48.0099	-43.3702	45.3764		-45.7666	17.7623	91.7872			-46.1362	15.1066	21.6141		-24.4656	39.2517	44.3366
-47.1511	-45.271	45.4312		-50.2733	17.8706	91.6146			-49.2487	15.0993	21.4563		-21.9551	38.7764	44.2224
-46.9588	-44.4654	45.5359		-52.9156	20.4493	91.6597			-47.9961	11.5012	21.5996		-26.0311	39.1805	44.1231
-49.3188	-43.1028	45.4619		-51.7005	22.1562	91.4734			-49.9988	13.7378	21.3868		-24.3218	38.4065	44.0913
-50.9342	-43.106	45.5808		-49.8547	26.5278	91.3242			-52.399	14.9025	21.2203		-25.3939	40.1405	43.8899
-49.0405	-42.3325	45.7601		-49.6905	19.7308	91.6489			-48.2468	12.1455	21.4141		-24.6641	36.6293	43.9579
-51.1841	-41.6248	45.7022		-50.7079	26.8252	91.2798			-50.025	16.2651	21.1056		-23.819	37.3433	43.797
-49.5112	-43.3526	45.8403		-51.7056	23.7523	91.244			-47.6558	17.4836	21.0125		-25.8455	35.9466	43.8471
-53.0493	-42.0888	45.6924		-47.4564	27.4514	90.9643			-46.4727	17.4646	20.9921		-24.7284	37.5532	43.5623
-54.8928	-39.515	45.679		-52.1311	26.6241	91.0128			-46.3041	18.599	20.8743		-24.8887	37.5298	43.5054
-53.5901	-37.8426	45.8363		-50.5059	23.4622	91.0557			-46.3078	18.4	20.766		-23.5095	38.1535	43.3014
-51.5642	-38.5124	46.0272		-51.2313	25.0451	90.5046			-47.7581	20.2348	20.398		-24.29	37.1145	43.3044
-55.785	-36.3372	45.7934		-51.2514	21.9819	90.6612			-47.5339	11.2687	20.5984		-27.2697	36.0391	43.2614
-54.5254	-35.6954	45.9357		-50.3488	22.8087	90.4547			-50.8527	5.38918	20.404		-25.05	38.5034	42.9659
-53.1718	-40.0123	45.8974		-48.0804	26.0601	90.0301			-49.2725	-2.68583	20.5753		-23.7948	37.9147	42.7458
-49.4617	-44.8718	45.8349		-51.2909	22.784	90.3554			-49.8873	-1.84163	20.3668		-24.3587	37.0232	42.7618
-43.6823	-50.7992	45.9027		-47.1304	25.4758	90.0327			-50.6211	-2.84048	20.3292		-23.7234	34.5275	42.6193
-39.4692	-54.1972	45.8782		-51.2593	22.542	90.2742			-50.936	-4.24283	20.2611		-31.9336	31.8276	42.5736
-42.1685	-49.4229	45.741		-53.4829	19.8814	90.2941			-51.7153	-2.22041	20.2218		-31.0549	31.9223	42.3637
-45.3834	-46.4352	45.7793		-50.5922	22.4469	90.069			-51.6627	-2.29621	20.1838		-33.8961	30.9349	42.1934
-46.6186	-44.0194	45.7048		-49.8231	25.6301	89.9004			-54.0463	-3.22197	20.0815		-34.9824	32.8593	42.0274
-49.6388	-35.4232	45.7008		-53.1333	24.1793	89.8145			-54.4371	-3.13453	20.0522		-36.4662	32.2564	41.9419
-52.9965	-20.159	45.6093		-53.412	24.0527	89.5443			-53.6751	-2.69253	20.0661		-35.7163	33.4815	41.7784
-51.2081	-7.66212	45.622		-53.0836	24.4951	89.4169			-55.8248	-4.61113	19.9492		-37.2878	33.4754	41.59
-49.9403	-1.83099	45.5891		-52.1804	27.3772	88.9585			-56.6429	-0.991258	19.6446		-36.0482	32.9606	41.5924
-46.6394	-2.22109	45.624		-52.4385	28.4944	88.9408			-55.0133	-7.28861	20.0166		-37.6427	33.1498	41.3106
-46.4879	-2.89091	45.4537		-52.0538	26.8687	88.7765			-56.8725	-3.86741	19.6866		-36.7968	34.0369	41.298
-45.2528	-1.79093	45.363		-51.0891	26.9221	88.4645			-55.233	-7.35854	19.8797		-36.738	34.0817	41.0999
-41.2606	3.67627	45.0378		-54.5136	21.9228	88.6563			-56.7264	-5.94593	19.6638		-38.3668	35.2308	40.824
-41.6364	7.63511	44.9259		-51.3379	23.1407	88.5128			-54.2404	-6.49328	19.6604		-36.1276	35.024	40.7858
-41.601	13.695	44.6612		-52.0136	22.2212	88.4318			-53.5045	-7.02501	19.6464		-38.7567	35.2451	40.6952
-40.4152	16.121	44.6667		-50.1231	25.8894	88.1922			-53.7944	-3.71042	19.3935		-38.1569	35.8001	40.4366
-40.7595	13.8344	44.6851		-49.148	23.1244	88.1505			-50.3572	3.78142	19.5299		-39.4121	33.182	40.5955
-41.7983	13.7004	44.5096		-51.335	22.356	88.3883			-45.8343	13.0039	19.6395		-38.1425	33.9038	40.3472
-42.129	12.0411	44.4978		-48.8196	28.0005	87.9672			-42.0664	21.1916	19.3171		-38.0361	34.4493	40.27
-43.3095	9.66129	44.5265		-50.5903	27.0201	88.0606			-33.7504	26.5636	19.3512		-37.4912	35.5147	40.0628
-42.5717	8.93763	44.5145		-50.3245	28.2346	87.947			-30.0938	32.3001	19.1894		-36.5559	35.7475	39.8608
-43.0239	9.2026	44.4735		-53.0511	26.0755	87.9993			-21.6429	35.987	19.1617		-40.2664	34.0089	39.8492
-45.5104	10.5924	44.2946		-52.7693	29.6483	87.7313			-17.1821	35.7263	19.1826		-38.4628	37.3726	39.5108
-43.7838	6.36373	44.4654		-52.2486	30.2338	87.658			-14.6839	34.1747	19.1908		-39.5579	35.423	39.4169
-43.6329	6.06873	44.3625		-49.4238	32.5067	87.3307			-12.9753	35.0917	18.9521		-37.1395	34.5504	39.322
-44.2297	5.5564	44.3307		-52.851	29.9599	87.4973			-12.5836	35.3422	18.8649		-38.9413	32.9693	39.2663
-42.9732	5.83751	44.4285		-49.7243	27.2719	87.4297			-14.6932	35.1228	18.5922		-38.8839	34.8009	38.9789
-41.0287	10.3628	44.5336		-54.0214	29.4155	87.1432			-13.8832	33.0161	18.5261		-36.2389	35.4688	38.7676
-42.1272	15.8304	44.2855		-53.4857	27.8428	87.0379			-17.3063	32.4587	18.3771		-36.6356	35.9193	38.5665
-42.0938	17.1272	44.3045		-54.6037	29.3271	86.8569			-17.7993	32.111	18.2701		-37.1967	34.892	38.6033
-42.7567	11.2338	44.4451		-53.5124	30.2966	86.7131			-19.4072	30.402	18.1696		-38.2689	33.9828	38.5632
-46.2034	6.38397	44.297		-53.472	29.4957	86.5689			-23.1407	29.0578	17.9543		-38.2835	35.4261	38.2681
-46.2539	2.53733	44.3203		-55.3425	28.3461	86.5512			-21.9053	26.0044	18.0741		-36.741	36.6268	38.0315
-46.1061	1.28015	44.4079		-52.1848	26.1973	86.5346			-26.9894	23.1471	17.8628		-38.1315	35.78	37.9273
-47.3959	2.23238	44.3502		-54.3862	31.9136	86.2847			-27.1073	19.811	17.8963		-39.3652	33.8547	37.866
-45.7415	0.651043	44.5397		-52.6537	30.7316	86.1349			-26.8425	20.612	17.7913		-41.3543	32.4547	37.7516
-47.0914	2.99994	44.378		-50.6628	31.4247	86.0742			-27.6775	18.84	17.7077		-41.5845	34.2967	37.5005
-42.8093	-0.33833	44.6273		-51.7958	37.4502	85.8097			-27.8396	17.6213	17.7029		-42.5063	31.7245	37.4577
-43.5263	4.15674	44.3981		-54.8107	28.2831	86.0754			-28.2433	19.0579	17.532		-38.3279	35.1035	37.1467
-44.9186	4.86038	44.2566		-53.7761	29.0619	86.0061			-25.0043	19.2594	17.6382		-41.7137	33.2243	37.1606
-43.0511	5.63229	44.2664		-55.3682	31.8024	85.8277			-24.5758	21.6973	17.4733		-40.6859	35.3486	36.9002
-44.9888	2.47456	44.2081		-54.1395	31.1188	85.1185			-24.2025	20.2401	17.5047		-41.9877	34.1452	36.8555
-45.3111	0.101128	44.2153		-53.6094	30.3798	85.0636			-23.4533	19.4871	17.4804		-40.2418	39.4729	36.3918
-44.1652	-0.914822	44.2867		-54.4691	28.4101	85.1626			-26.3752	18.6631	17.3021		-40.0833	37.432	36.414
-45.3391	-1.41972	44.2061		-54.5997	29.4448	85.0606			-27.0483	13.6398	17.4774		-42.0053	39.1467	36.1052
-45.9839	-3.49086	44.0032		-55.0706	28.2257	85.2376			-31.3814	9.26133	17.2778		-38.0896	38.3507	36.1142
-42.9755	-8.39334	44.2709		-54.8329	29.9615	85.1242			-31.6304	10.1724	17.1996		-38.0205	34.3047	36.1735
-44.5282	-6.29836	44.2895		-55.1143	29.0926	85.0518			-30.5576	11.4549	17.1647		-39.9257	37.6392	35.7938
-45.2554	-5.43902	44.2964		-52.8091	28.259	85.0223			-28.677	12.2608	17.2652		-39.4587	37.6293	35.566
-45.8134	-2.10046	44.2342		-55.4722	26.7655	84.9804			-28.325	16.3076	17.0221		-40.0101	31.405	35.8029
-46.393	-1.00808	44.1596		-52.6638	30.217	84.763			-19.6405	24.0662	16.8582		-36.1392	33.9787	35.447
-46.3531	-3.03679	44.3028		-54.1415	30.4002	84.6495			-7.28576	27.4186	16.9549		-39.0135	31.4567	35.4035
-47.411	-1.4729	44.1409		-55.3013	32.29	84.5031			5.1203	28.7628	16.8559		-38.2362	33.1876	35.1919
-46.5892	-1.90543	44.1594		-53.6576	36.4685	84.2105			10.297	30.5026	16.7914		-39.4628	33.2545	35.0191
-47.5333	-4.58858	44.2527		-54.8325	33.848	84.4575			16.2356	31.471	16.6962		-39.8466	33.2288	34.8547
-43.9239	-9.97063	44.4195		-55.3586	32.9324	84.5856			23.2767	31.2648	16.7831		-40.2539	33.2127	34.7285
-45.6005	-11.9585	44.277		-54.317	33.5114	84.4139			27.3426	32.9991	16.6598		-40.9532	33.7295	34.4175
-45.9832	-10.035	44.1865		-54.6193	31.6568	84.2662			30.6824	32.926	16.6104		-40.9567	29.7901	34.5608
-45.5159	-10.1816	44.2554		-54.6936	31.1433	83.9179			35.4509	34.6531	16.3601		-43.7196	32.3897	34.3807
-47.1156	-6.26204	43.8429		-53.8535	32.2041	83.7775			38.2738	32.3317	16.4598		-42.3324	31.9047	34.202
-47.4139	-8.78523	43.8244		-53.8431	30.5319	83.781			43.2664	32.0618	16.336		-43.1967	33.7627	34.0412
-46.5828	-12.6365	43.8887		-56.9458	30.2076	84.0312			45.8647	30.4372	16.2267		-42.0037	32.3601	33.9881
-44.9142	-12.5128	43.853		-52.0495	31.4048	83.8323			46.9069	32.1086	15.9036		-41.8148	33.9386	33.7147
-44.5544	-13.8217	43.8481		-54.8099	31.0449	83.8463			49.8416	27.7732	16.0469		-41.5711	33.6692	33.5894
-41.8147	-12.8303	43.9732		-53.2985	31.9377	83.6825			51.6502	29.6565	15.7692		-42.7864	29.5763	33.6225
-41.3658	-11.5504	43.8878		-51.5238	30.4137	83.6065			52.3088	26.0725	15.8699		-41.9265	32.9951	33.3316
-40.2752	-12.4591	43.9812		-50.8187	29.4803	83.5822			51.0569	28.9618	15.6914		-42.2463	35.7735	33.0788
-39.9345	-12.9266	43.9679		-51.5274	28.5329	83.4826			48.7952	31.6492	15.7941		-42.6146	34.6868	33.0363
-39.1189	-11.8724	43.9508		-50.4093	30.6096	83.2997			42.1043	38.4991	15.5735		-43.9103	35.3987	32.842
-11.67	22.3999	42.8855		-49.958	32.091	83.0853			28.5652	44.1421	14.9757		-42.5971	34.3513	32.8358
-12.2937	23.0958	42.7652		-52.6138	29.9225	83.169			27.9961	45.8332	14.8129		-45.1209	34.5902	32.6929
-13.3676	23.5196	42.5936		-51.7701	29.5777	83.0949			27.1695	46.0598	14.7266		-43.9492	36.0583	32.5045
-15.1019	21.7141	42.8542		-51.1288	32.6951	82.4292			27.066	46.2855	14.633		-47.9401	36.1669	32.4089
-12.138	23.2683	42.605		-53.1162	28.0664	82.5888			29.9952	46.4761	14.4227		-47.7284	37.5774	32.2162
-11.8818	25.9049	42.3796		-50.3	31.8132	82.4176			32.9547	44.2891	14.4173		-45.6896	36.886	32.1395
-9.97089	25.9308	42.2737		-51.942	29.3421	82.5626			36.8466	43.954	14.2047		-45.9508	38.2474	31.9306
-7.89591	26.642	42.16		-48.6818	32.237	82.3517			9.209	51.6917	12.9011		-45.1034	38.606	31.8704
-3.16198	27.2887	42.2183		-48.5052	34.3459	82.0573			10.6604	52.0663	12.7186		-43.6375	40.4583	31.7569
0.285345	26.5658	42.2577		-51.8237	30.368	82.1909			12.0461	51.6828	12.5943		-44.1812	40.3892	31.5518
2.26103	28.6736	42.0407		-53.1887	31.0415	82.0017			13.9583	50.4463	12.5317		-44.495	40.851	31.5206
0.495299	27.8313	42.0276		-53.9499	30.7018	81.8378			22.1236	47.5809	12.3429		-43.9382	39.4468	31.5633
0.000535513	26.7872	42.0378		-53.7374	31.8118	81.7363			29.8814	41.1007	12.3697		-45.7472	40.889	31.4062
-1.03876	27.0247	41.9843		-54.1926	29.6144	81.7443			36.0261	36.4986	12.1536		-47.9536	42.9516	30.9471
-4.15119	26.1451	41.8406		-51.3793	30.1527	81.5978			38.6639	33.5332	12.1144		-47.4509	40.2843	30.9976
-4.07298	25.2003	41.8016		-52.5406	31.1295	81.581			33.4579	37.7352	11.9111		-46.9185	42.1199	30.9452
-4.45611	26.1655	41.7634		-53.8741	30.4308	81.4432			29.868	41.7159	11.6875		-46.3043	37.6226	31.1273
-4.44371	25.4094	41.8855		-53.8822	30.8119	81.3721			26.1213	43.5194	11.5168		-46.9723	36.107	31.1293
-4.33916	26.0333	41.8944		-53.1326	27.567	81.3748			30.6843	40.8327	11.6209		-45.406	38.9146	30.7286
-3.72689	24.7474	41.9888		-52.2718	31.6472	81.077			30.6791	42.1832	11.3455		-45.7535	38.3981	30.7008
-4.43415	25.0172	41.9038		-52.68	30.5823	81.0465			32.6204	40.5836	11.2998		-43.1394	39.4177	30.39
-2.46435	25.5183	41.9939		-52.8237	29.2929	81.1005			39.1256	66.5535	47.3737		-44.8392	38.1781	30.4343
-0.962487	26.8235	41.911		-52.4688	28.954	80.9354			46.2576	63.6927	47.162		-41.7825	38.071	30.1763
1.08163	27.8358	41.8345		-52.0436	29.2511	80.5888			54.1775	57.2758	47.0812		-42.1067	38.1253	29.9457
2.82794	26.5001	41.9034		-51.6026	28.3457	80.5255			58.9593	50.9407	47.056		-42.1829	37.1393	29.9255
2.4326	26.8756	41.8138		-50.8504	28.7133	80.2788			60.4669	49.9114	46.89		-40.5964	39.8715	29.6841
2.56486	26.6256	41.7718		-50.6104	27.2172	80.2803			62.1221	47.4055	46.9193		-39.9823	41.5876	29.5144
2.88119	25.4033	41.7791		-50.3342	28.285	80.1666			63.2394	48.3338	46.5866		-43.9898	40.5719	29.4782
0.990822	25.6438	41.662		-51.0841	27.6428	80.0956			61.7374	48.2938	46.5222		-42.3317	40.6416	29.2389
-0.477584	27.0787	41.503		-51.6021	27.9189	79.9792			61.0497	50.7104	46.3722		-42.2818	39.4935	29.2667
-0.413138	24.7367	41.6198		-51.6662	29.7495	79.8008			57.0918	52.5373	46.2787		-44.7493	38.9472	29.0868
1.00552	25.3423	41.6047		-51.6201	29.7647	79.6954			60.5461	53.3673	46.109		-43.5445	39.8695	28.982
-2.20113	26.6517	41.4499		-48.5918	31.8492	79.5569			59.8645	52.633	45.8977		-43.631	40.1352	28.8501
-5.39531	29.9307	41.2678		-50.7118	29.7707	79.6123			64.9566	50.9499	45.699		-42.9648	40.5619	28.7136
-6.27772	29.5433	41.257		-51.357	28.8665	79.5348			65.1351	49.6971	45.6676		-43.2266	39.1503	28.7537
-8.34859	28.5517	41.0671		-51.9665	29.2217	79.395			64.6316	46.204	45.695		-41.8416	39.7223	28.5682
-6.41777	25.4758	41.1272		-49.871	30.5404	79.0799			62.8561	48.4885	45.3805		-44.5284	41.4424	28.4454
-7.06873	23.4171	41.0555		-49.7648	29.1911	79.1446			61.6152	47.6026	45.3042		-44.244	39.7043	28.3948
-9.19493	22.5478	40.954		-47.6201	31.4707	78.9813			59.7754	52.1459	44.9782		-40.3328	41.34	28.1422
-9.90609	20.028	40.9282		-48.1443	28.7412	78.9178			50.4904	59.324	44.9372		-42.1183	38.5978	28.2759
-11.736	21.3688	40.7075		-49.6654	29.3896	78.7519			44.3563	65.1382	44.6455		-42.4176	39.8938	27.9858
-10.7564	22.4774	40.829		-50.5859	26.5233	78.8076			38.229	66.9443	44.7213		-42.647	39.1641	27.9922
-9.42291	22.9564	40.5954		-49.4176	25.4621	78.717			37.8198	69.0143	44.5256		-43.5166	37.8081	27.9384
-6.78929	23.4637	40.555		-49.6229	27.1177	78.5545			33.6179	70.4111	44.3754		-43.6816	39.2525	27.7493
-6.95929	23.878	40.5239		-52.16	27.8235	78.319			30.6302	69.9232	44.3366		-42.9085	38.2364	27.7727
-5.75507	24.0631	40.5308		-50.4873	27.2324	78.1779			41.3901	50.4613	41.5924		-42.0742	38.5279	27.5814
-7.58632	23.1036	40.3631		-50.5628	26.8712	78.0948			42.0864	48.8624	41.3106		-40.9622	39.5414	27.4529
-7.42691	22.5041	40.4872		-50.9697	26.7097	78.0423			44.9618	48.0651	41.298		-40.7904	39.3144	27.405
-6.84948	22.6685	40.3937		-49.7416	27.0377	77.752			47.2919	46.1434	41.0999		-42.7453	38.322	27.3683
-7.59269	24.8991	40.212		-50.4968	26.0098	77.7573			47.2439	45.4994	40.824		-44.0423	38.8382	27.2908
-6.1532	24.8817	40.2331		-52.3859	27.0736	77.6656			51.6712	43.1654	40.7858		-44.3214	38.6457	27.2382
-8.60611	25.6997	40.0625		-52.2084	23.9612	77.6735			50.6017	40.8616	40.6952		-46.2107	39.3665	27.0953
-9.74316	24.1379	40.2419		-51.6242	26.4236	77.7323			51.0378	40.7474	40.4366		-45.9524	39.1241	27.0689
-10.1643	23.7306	40.141		-52.5094	27.0209	77.3392			47.7635	40.6302	40.5955		-42.5165	41.3979	26.7451
-11.7934	23.3245	40.1278		-53.5637	22.4955	77.0781			45.9237	43.5002	40.3472		-42.8565	41.3346	26.6562
-11.9975	26.3994	39.8891		-50.6883	24.3011	76.8675			42.7468	45.8693	40.27		-45.0275	42.1977	26.5792
-12.4262	25.7616	39.8967		-51.4545	23.6124	76.7784			41.1262	47.4268	40.0628		-45.2646	41.151	26.4646
-10.5687	23.0645	40.0254		-53.1449	25.8699	76.6156			40.3553	48.3845	39.8608		-45.8362	39.2021	26.4583
-10.9522	25.4753	39.8106		-52.5333	26.6209	76.3147			36.1467	47.3034	39.8492		-45.5616	40.3478	26.3091
-9.78061	24.2619	39.8574		-50.7554	26.6351	76.114			38.9476	50.2554	39.5108		-44.0062	42.136	26.1578
-7.80654	23.3442	39.9345		-53.1048	25.3603	76.0745			43.4537	46.3809	39.4169		-44.5804	39.1289	26.1564
-10.3105	25.8763	39.5913		-49.6415	22.9723	75.9851			50.1358	42.8537	39.322		-46.5634	38.7738	25.9716
-9.73933	23.3782	39.7333		-54.1811	27.4761	75.5745			52.2054	38.4309	39.2663		-45.472	41.1773	25.7166
-10.0056	25.2204	39.5405		-54.3696	28.448	75.5232			56.3539	35.3802	38.9789		-45.3622	41.9049	25.6234
-10.2763	23.6204	39.6255		-49.2656	24.1089	75.4828			62.4158	29.3404	38.7676		-48.4439	40.9973	25.5874
-43.0355	-3.73626	40.5714		-48.8603	25.1532	75.2982			64.6336	24.1668	38.5665		-48.4717	43.1009	25.4431
-43.2124	-2.65658	40.6229		-52.2298	25.9701	75.1255			61.3499	27.8306	38.6033		-45.7373	45.6435	25.18
-44.8342	-2.36881	40.6533		-50.7428	25.5587	74.8831			56.7349	32.9046	38.5632		-46.8988	43.1719	25.201
-43.4846	-1.70207	40.7944		-50.9002	23.9069	74.8865			54.0091	39.7038	38.2681		-46.9988	44.3961	24.9539
-45.5004	-2.92005	41.0181		-51.3365	25.6988	74.5935			51.5144	45.6092	38.0315		-45.8244	45.3875	24.8065
-47.2801	-3.98411	41.1972		-50.3157	23.0319	74.4864			45.3311	49.168	37.9273		-46.267	47.6326	24.5726
-54.0236	-1.89735	41.0515		-47.8798	21.0372	74.3528			41.4358	50.6215	37.866		-45.6651	45.7357	24.5898
-67.4652	-41.7737	46.4063		-49.3189	20.2004	74.1193			37.8902	51.6289	37.7516		-44.8863	47.7886	24.3911
-70.166	-37.8967	46.4734		-48.2463	20.7759	73.9731			42.1841	50.2095	37.5005		-45.5707	46.0717	24.423
-73.6016	-32.2906	46.4105		-49.5581	19.7637	74.0118			46.4194	43.8641	37.4577		-44.5499	47.3666	24.1683
-77.9313	-27.0863	46.3578		-48.4768	24.4502	73.7804			53.5261	42.3359	37.1467		-42.5035	49.5244	23.9212
-74.5966	-27.7388	46.472		-48.1869	23.3743	73.7023			49.2756	42.06	37.1606		-45.2959	50.1878	23.849
-72.0616	-27.4151	46.4889		-50.3116	22.1806	73.5704			46.7547	47.28	36.9002		-43.5336	48.2819	23.7186
-70.2799	-26.1594	46.3526		-50.0033	21.4108	73.4115			40.7768	48.802	36.8555		-44.3279	45.9206	23.7917
-67.2598	-27.9426	46.4921		-49.4474	21.8518	73.4262			36.8692	55.2951	36.3918		-41.9861	47.6371	23.5153
-66.7515	-26.8747	46.4765		-50.977	21.4784	72.9885			39.3007	52.4714	36.414		-42.1274	47.3662	23.3145
-65.6876	-29.5017	46.6133		-49.5831	21.5143	72.9251			36.9661	52.8736	36.1052		-43.4708	46.1337	23.2137
-63.2634	-26.713	46.6015		-50.2895	21.4346	72.7283			41.5244	51.5059	36.1142		-43.5581	46.1709	23.1116
-66.5171	-28.6226	46.506		-49.0189	20.2691	72.5064			46.8248	44.6099	36.1735		-42.2291	44.9389	22.942
-66.0437	-27.5138	46.5518		-50.0021	20.7292	72.4929			47.1694	45.4947	35.7938		-43.0338	44.7575	22.7273
-66.6446	-27.4273	46.5158		-52.0527	19.864	72.1147			50.7138	43.3344	35.566		-40.6876	47.9162	22.4827
-60.294	-37.8149	46.4763		-51.4875	21.6949	72.2545			52.3368	37.0106	35.8029		-42.8215	47.9442	22.2848
-54.1814	-46.5323	46.5261		-52.7635	24.0704	72.0262			56.2446	40.7743	35.447		-42.8273	47.7058	22.1533
-50.5392	-49.4271	46.5878		-48.5653	20.9234	71.7685			53.8334	40.3958	35.4035		-42.8238	46.0594	21.939
-53.4842	-48.7205	46.4544		-50.3803	19.6265	71.4838			54.9177	42.4441	35.1919		-44.1828	43.8718	21.9126
-52.6346	-48.0245	46.5148		-50.8762	22.8784	71.3447			54.8267	38.6449	35.0191		-44.1452	45.3363	21.699
-55.3413	-46.4272	46.432		-51.8776	24.3092	71.171			55.8888	34.9411	34.8547		-42.8646	44.4781	21.5484
-58.6732	-43.0971	46.4285		-52.4952	22.1951	71.03			57.1487	31.667	34.7285		-44.2629	45.1491	21.3295
-60.4971	-39.0941	46.474		-51.357	22.122	71.02			55.6155	34.6328	34.4175		-42.6772	45.4658	21.2256
-63.1413	-31.5409	46.3732		-50.745	22.8753	70.8967			54.0501	33.4798	34.5608		-44.3274	45.4998	21.1341
-68.1255	-25.5447	46.2834		-52.2641	21.5478	70.8824			49.7738	39.2303	34.3807		-44.1997	46.0834	20.8885
-69.201	-18.746	46.3006		-50.1097	21.2712	70.8142			49.654	39.922	34.202		-40.7929	48.2552	20.5938
-71.9974	-15.8187	46.2162		-52.0924	21.5302	70.2885			46.7714	43.161	34.0412		-43.028	49.4065	20.4688
-70.3414	-24.1638	46.189		-52.0668	23.6287	70.1631			46.8721	43.4201	33.9881		-41.3217	48.55	20.3318
-67.8016	-29.4122	46.0753		-51.6036	24.3708	70.722			45.2833	47.3439	33.7147		-44.0346	48.2914	20.2351
-59.9773	-40.4729	46.3828		-50.0359	25.4686	70.6389			42.6727	50.2136	33.5894		-40.5601	51.3314	19.9109
-59.8188	-40.8045	46.4095		-51.3527	24.5846	70.6827			39.9577	48.4047	33.6225		-40.0398	51.1038	19.7119
-64.1753	-39.7365	46.2585		-51.6964	27.6149	70.2573			38.5288	52.6092	33.3316		-41.5591	50.7241	19.6012
-62.796	-38.8644	46.4814		-51.4887	24.7588	70.1683			37.1337	55.065	33.0788		-39.645	48.6945	19.4969
-67.1701	-37.2682	46.3941		-52.4723	21.8237	70.2226			37.7225	53.186	33.0363		-36.5324	50.6243	19.2509
-65.0459	-32.6951	46.622		-52.7961	23.4221	70.0104			36.8532	53.3208	32.842		-40.471	50.3347	19.1591
-67.4366	-28.7135	46.5636		-52.8429	24.552	69.8713			40.4457	50.7914	32.8358		-38.9943	51.9676	18.904
-65.3315	-28.7625	46.8468		-51.2271	24.2137	69.8727			41.3681	47.9672	32.6929		-39.3301	49.346	18.9118
-69.5484	-24.06	46.8392		-52.1656	25.6069	69.8018			46.5826	45.5244	32.5045		-38.063	50.9744	18.6572
-69.3215	-19.1867	46.97		-52.063	24.4024	69.8905			47.0817	41.9672	32.4089		-39.5264	52.1342	18.4716
-72.1913	-13.9573	46.6829		-52.2118	29.518	69.5078			46.5917	43.6382	32.2162		-39.2604	52.3897	18.2443
-69.2637	-17.3142	46.8893		-53.2148	26.1357	69.2397			48.0138	43.3917	32.1395		-36.7975	53.0596	18.0812
-69.4017	-17.7318	46.7455		-53.4413	24.3435	69.2881			45.5928	45.9076	31.9306		-36.5476	53.4692	17.9298
-66.5686	-20.9915	47.0087		-52.6067	22.4717	69.1882			30.1767	54.2945	25.9716		-36.7888	53.0447	17.7944
-66.5764	-20.5243	47.0461		-51.7277	21.0834	68.9538			30.2703	56.7276	25.7166		-36.7576	53.7424	17.6036
-68.1631	-19.2184	46.9427		-53.3958	22.1103	68.8039			31.7575	56.8932	25.6234		-38.8636	52.8081	17.5145
-64.7163	-22.8567	47.1948		-52.8188	21.6814	68.5987			30.3164	55.1627	25.5874		-38.6753	52.4052	17.3855
-65.8415	-21.4301	47.185		-53.3187	22.9734	68.4663			24.0505	57.7953	25.4431		-37.2861	53.04	17.1469
-64.1712	-23.7502	47.3558		-52.5441	25.0489	68.2956			19.7231	61.4552	25.18		-38.3922	52.0889	17.1907
-63.8518	-25.0869	47.5151		-53.0685	23.6699	68.2746			15.1234	60.0045	25.201		-35.9103	52.4684	16.9167
-63.3248	-25.1483	47.5702		-52.7546	23.3581	68.0465			11.8551	61.7522	24.9539		-36.6001	52.9117	16.8374
-64.3948	-28.0404	47.5737		-52.2599	24.8767	67.9522			10.763	63.9174	24.8065		-36.9947	51.2018	16.7751
-64.2162	-28.8256	47.6687		-51.2689	22.0411	67.9401			6.67392	64.2984	24.5726		-36.1366	52.9438	16.6333
-62.8253	-29.3691	47.5647		-52.9947	21.7402	67.8889			14.7129	84.3548	10.0763		-34.6609	54.0121	16.4258
-63.0614	-32.1593	47.5924		-52.0083	22.2187	67.3703			13.4745	88.0813	9.87013		-33.0888	55.4079	16.2372
-62.5586	-34.3632	47.6929		-52.9503	23.6529	67.4819			6.58597	86.8043	9.79588		-32.6222	53.639	16.07
-60.1761	-36.8741	47.9494		-52.9808	25.6127	67.3681			11.8932	87.8343	9.52355		-33.3415	51.6576	16.0889
-61.2566	-35.1062	47.9125		-53.9354	28.1382	67.159			20.6476	87.5948	9.20599		-33.656	52.5924	15.889
-63.7886	-30.5731	47.8049		-53.6314	28.4901	67.1588			22.8329	85.5624	9.2403		-34.1437	52.6258	15.6993
-63.4471	-32.9335	47.9954		-52.2194	27.2097	67.1531			39.0185	80.1844	8.63879		-34.1486	51.5046	15.6295
-65.4368	-29.728	47.9829		-49.9233	25.7444	67.1564			72.8984	45.4448	8.77905		-35.8435	50.0175	15.5595
-62.4544	-28.8664	48.3065		-51.9342	25.4355	66.7895			42.9987	74.2947	8.41134		-33.153	52.6814	15.2909
-66.1364	-24.7747	48.161		-51.2547	25.0219	66.6506			7.59458	63.3126	7.70535		-32.7765	53.2295	15.0988
-43.7149	-73.488	65.8926		-50.0661	24.1878	66.6911			11.0174	63.549	7.46244		-35.2014	52.3723	15.0935
-52.7411	-69.7882	66.0026		-51.0176	22.625	66.6223			9.95148	61.4689	7.30304		-33.1422	54.5417	14.8175
-61.166	-63.8694	66.1804		-51.431	21.8407	66.5782			50.294	32.7386	NaN		-32.728	56.2851	14.6291
-72.088	-51.1874	66.2677		-52.8136	21.2247	66.5434			40.8687	41.743	NaN		-31.9092	56.608	14.5044
-75.0947	-47.5418	66.274		-53.1651	22.4056	66.6821			33.5905	47.1098	NaN		-31.1297	57.4361	14.3602
-73.5006	-44.5034	66.3806		-52.1091	24.7415	66.539			27.378	56.2042	6.17237		-32.1188	56.1989	14.2371
-70.8847	-49.1956	66.5146		-56.2754	22.347	66.5045			31.5711	53.3802	6.23153		-32.0112	54.8639	14.1563
-67.5344	-53.4023	66.6781		-53.2789	17.9531	66.1227			30.9342	57.5944	6.40746		-30.9801	53.1292	14.0467
-64.4761	-57.8055	66.6617		-51.2291	17.0426	66.4341			34.9887	57.4121	6.34866		-32.9345	54.3318	13.8383
-62.3247	-60.5846	66.7742		-52.8502	18.3913	66.1413			33.5841	58.2847	6.68963		-34.535	54.0896	13.8056
-67.0351	-54.4562	66.8151		-54.5108	16.5719	66.3697			32.594	60.6352	6.98707		-34.4198	53.9924	13.6555
-69.6085	-47.865	66.779		-54.2566	21.6189	66.1173			33.3836	61.2149	7.0801		-33.101	55.8539	13.4202
-70.7573	-40.8036	66.8942		-55.0297	23.6639	65.5396			33.7617	59.5245	7.26471		-34.1509	53.2902	13.4699
-71.53	-37.9462	66.9945		-53.7661	22.2956	65.7563			17.3835	65.5629	7.23629		-34.3714	54.4733	13.3296
-69.5637	-36.3524	67.1685		-53.5964	21.4729	65.8095			6.38404	72.7937	7.53839		-34.0018	56.538	13.1
-69.5808	-33.6515	67.162		-54.0121	22.198	65.8019			-9.98453	72.407	7.39627		-33.3526	57.4984	12.9234
-69.6021	-29.8841	67.21		-50.6456	22.9266	65.7815			54.1601	42.2876	7.31044		-33.4755	55.2981	13.0184
-69.4876	-22.8289	67.2689		-52.4427	24.5779	65.6031			56.1544	40.088	7.41149		-32.0162	57.353	12.8557
-72.9389	-17.8746	67.2536		-53.5311	26.2221	65.5655			51.4659	42.3539	7.1529		-31.8413	56.6528	12.7
-72.4507	-10.1974	67.2668		-56.4377	29.5145	65.3254			54.5281	43.6926	6.98135		-33.2563	55.9674	12.6446
-74.5109	-6.41514	67.3185		-54.7703	28.9281	65.2579			52.2392	44.9467	6.71106		-36.1756	55.448	12.521
-75.3789	-1.83754	67.4032		-52.5397	21.341	65.6017			54.2477	47.3831	6.4436		-34.4836	56.6005	12.3457
-74.9277	5.68191	67.4171		-52.0582	21.6331	65.4863			53.7799	48.6823	6.08868		-33.832	58.8893	12.2153
-74.4092	0.354596	67.7246		-53.5371	22.4716	65.3937			49.811	48.2155	6.10945		-33.2764	60.3619	12.0578
-75.8534	-8.66894	68.0894		-53.0363	23.8579	65.3427			51.5107	48.5888	NaN		-31.3141	58.3566	12.1522
-72.0109	-19.6871	68.3673		-52.5397	25.1141	65.2226			44.4832	42.1026	NaN		-27.5609	60.846	11.8287
-72.2822	-24.3971	68.3333		-51.4293	24.4528	65.2714			46.8082	36.8961	NaN		-22.764	58.2917	11.7724
-71.13	-25.1396	68.5339		-48.6143	23.8627	65.2827			52.1007	38.6359	NaN		-24.9868	57.5535	11.6695
-70.3388	-26.945	68.6454		-46.965	24.7865	65.1685			53.1262	35.8705	NaN		-23.3348	55.4255	11.6651
-70.0518	-24.6097	68.8283		-44.6619	23.7366	65.0633			57.1699	34.9038	NaN		-22.4462	55.6413	11.5845
-69.0093	-31.1929	68.5489		-40.8604	24.1775	64.9127			55.8421	37.4493	NaN		-25.9708	55.8444	11.6728
-69.0243	-33.2634	68.8053		-42.1422	23.463	64.9017			54.8929	41.6392	NaN		-21.7772	54.7444	11.5063
-66.0333	-39.9907	69.0018		-40.8319	22.5417	64.6989			51.96	46.7582	NaN		-21.2262	53.9842	11.3806
-67.3023	-42.2897	69.0851		-40.4863	21.8788	64.6695			52.3371	49.4444	NaN		-20.0712	54.5925	11.3144
-66.4138	-41.68	69.2337		-40.8679	22.319	64.5343			53.4548	51.7454	NaN		-18.0931	52.3714	11.1553
-67.7391	-40.5763	69.3017		-42.3909	25.9091	64.3387			44.0956	55.3921	NaN		-21.3641	52.732	11.0719
-65.3477	-42.4653	69.5657		-42.8216	24.6344	64.3273			47.1507	58.2316	NaN		-22.3125	52.1746	11.0103
-66.7163	-37.7121	69.5522		-42.7561	23.0254	64.3424			49.582	62.57	NaN		-23.9972	50.236	11.0159
-66.8662	-37.339	69.7491		-44.4507	23.9686	64.278			53.2123	66.4476	NaN		-24.5619	52.9528	10.8143
-68.4523	-35.3845	69.9782		-42.9474	24.378	64.1836			58.754	56.7579	NaN		-23.8256	49.7542	10.8877
-66.2803	-39.5697	70.1609		-44.9642	24.5994	64.0576			64.4303	45.6613	NaN		-21.456	50.4587	10.6055
-64.3146	-43.9131	70.2067		-46.3837	24.8083	63.9948			52.2099	47.7435	NaN		-20.14	52.9066	10.4298
-63.5352	-47.177	70.4092		-44.8517	22.4155	64.1047			61.2855	53.9211	NaN		-21.5585	54.7711	10.0482
-62.2715	-49.6656	70.4923		-43.773	26.8543	63.7442			51.2013	64.3581	NaN		-22.822	53.8244	10.0763
-59.7701	-50.1857	70.7238		-46.2572	27.7017	63.5912			40.7844	65.0813	NaN		-18.9622	54.1464	9.87013
-56.9483	-54.0304	70.8025		-45.5637	28.6282	63.4978			31.582	54.0138	NaN		-23.3766	54.2117	9.79588
-59.8602	-56.07	70.7576		-43.9402	27.2837	63.535			20.1447	50.7938	NaN		-20.7614	55.2657	9.60736
-61.9361	-51.0559	70.9038		-47.6086	29.3181	63.3095			17.4839	56.797	NaN		-22.1821	53.8499	9.52355
-62.5776	-48.6326	71.1009		-46.172	31.8611	63.1386			13.0006	56.556	NaN		-19.2053	53.4003	9.35009
-64.8894	-47.7412	71.4431		-48.1753	30.3929	63.179			11.9994	56.0798	NaN		-22.9349	56.2564	9.20599
-65.7499	-45.0585	71.6618		-48.4038	29.2774	63.1418			8.57426	62.9771	NaN		-24.6409	54.5999	9.2403
-64.4382	-50.3597	71.8114		-45.3332	29.9198	62.9705			7.47214	36.4854	NaN		-17.2288	59.7052	8.85161
-64.5967	-50.2173	71.9045		-46.0016	30.9503	62.6447			11.3853	41.1076	NaN		-20.2018	56.9638	8.83021
-60.1199	-54.4365	72.0274		-46.6247	32.1879	62.4355			-1.76668	46.4296	NaN		-18.297	56.2897	8.76189
-50.0263	-63.8435	72.2055		-47.0325	32.1418	62.3251			0.689689	49.5469	NaN		-16.6704	57.1914	8.97933
-40.5729	-69.7587	72.1952		-44.5803	30.7682	62.2101			-5.89551	49.6788	NaN		-18.182	57.6738	8.91397
-28.9688	-77.253	72.23		-45.9797	30.5154	62.08			-15.0125	47.7432	NaN		-17.8326	55.0211	8.7202
-26.8467	-76.9503	72.2902		-46.8898	31.9668	61.7814			-19.009	51.0705	NaN		-19.7937	54.8115	8.63879
-20.52	-78.942	72.4635		-43.8446	29.6253	61.6694			-2.83224	55.1206	NaN		-19.4842	57.7671	8.84557
-17.4572	-81.0233	72.4777		-47.4857	30.582	61.5018			2.44272	57.2661	NaN		-15.8096	59.9464	8.61643
-18.2524	-80.5732	72.5813		-44.8623	30.3409	61.3529			3.6463	64.4457	NaN		-23.9974	53.4078	8.77905
-26.4795	-78.1967	72.7763		-48.3422	31.1584	61.3466			10.6368	61.669	NaN		-18.5758	59.1069	8.36062
-27.8676	-77.171	72.9944		-48.2186	32.4299	61.029			19.5353	50.9387	NaN		-16.7082	58.9421	8.15654
-34.7363	-75.3105	72.688		-48.9292	32.4986	60.922			20.745	87.1477	NaN		-19.9212	56.0915	8.11561
-37.8547	-72.2676	72.7225		-49.0337	31.4392	60.8569			-13.6649	83.7989	NaN		-21.3523	57.1499	7.93854
-45.2179	-67.7193	72.7325		-48.536	33.0657	60.5647			7.24557	84.3273	NaN		-19.0861	59.0411	8.04646
-44.6687	-65.0283	73.0497		-47.4105	36.4523	60.2503			37.2266	81.4308	NaN		-19.5795	56.1104	8.07895
-42.3259	-68.6499	73.0259		-50.3658	33.4351	60.1987			36.2818	76.2192	NaN		-22.5238	56.5507	8.08125
-35.2205	-74.451	73.1828		-48.8736	30.4789	60.1422			28.1644	72.0089	NaN		-21.4661	56.3181	8.14253
-26.2196	-81.0823	73.4508		-45.4172	30.4643	59.9487			32.7223	72.699	NaN		-20.745	57.9657	7.93711
-28.1472	-82.602	73.3872		-45.3824	27.9979	59.8828			89.7369	2.22832	7.10529		-23.0995	54.4654	7.90534
-36.1999	-79.3989	73.3823		-45.2957	28.6097	59.7458			74.8482	35.0119	NaN		-23.7591	56.1486	7.78194
-38.69	-76.0677	73.6919		-45.4724	28.9815	59.5823			68.4933	48.9873	NaN		-21.6272	56.3543	7.74342
-44.435	-75.4473	73.7264		-45.0993	29.0486	59.3773			73.7752	33.5912	NaN		-21.4181	59.0617	7.79222
-48.2426	-71.7207	73.7941		-46.2734	28.0627	59.3177			80.3581	38.3053	NaN		-20.152	59.3806	7.73838
-50.9053	-68.0688	73.9372		-46.533	27.7604	59.1513			81.8352	22.8137	NaN		-17.88	60.8059	7.69674
-56.2849	-63.9575	73.9172		-46.4203	27.3083	59.0906			77.3903	35.2446	NaN		-16.3908	57.5411	7.34511
-59.9759	-59.8002	74.1752		-44.9497	27.1059	58.9821			78.3216	37.6143	NaN		-20.1811	56.5982	7.58471
-64.1712	-52.503	74.3505		-47.3072	30.5076	58.6745			68.7588	47.1085	NaN		-18.5839	57.229	7.42766
-69.7534	-42.9237	74.4669		-46.2698	29.0447	58.6341			71.7076	47.5113	NaN		-16.2606	57.8109	7.46036
-73.3674	-35.6377	74.5053		-47.0572	31.052	58.4103			74.7662	33.0126	NaN		-14.6092	57.5403	7.34203
-70.6952	-38.2736	74.6248		-47.5073	30.058	58.3812			63.2008	45.6172	NaN		-17.2424	57.5931	7.53436
-69.7239	-42.8907	74.6012		-48.5365	32.1932	58.1923			70.0635	41.4473	NaN		-13.0286	63.4071	7.25578
-68.7482	-43.5847	74.6631		-49.8835	33.1312	57.978			66.765	33.8211	NaN		-13.2895	60.3688	7.33442
-70.6844	-44.9086	74.6273		-48.1509	30.987	58.0356			72.8028	16.5233	NaN		-12.1774	59.1815	7.24785
-66.7783	-46.136	74.9347		-50.9928	32.176	57.7128			68.3344	21.1527	NaN		-12.5942	63.217	7.3634
-65.7948	-43.0928	75.151		-51.3832	34.185	57.435			68.7383	19.1993	NaN		-17.8851	56.9002	7.39948
-69.5545	-37.8227	75.1323		-51.0288	34.8652	57.3609			71.4068	23.4966	6.23114		-14.0922	61.3002	7.00166
-74.4428	-29.1217	75.1533		-50.5797	39.2257	57.0111			72.6209	29.6696	NaN		-15.4166	59.7786	7.11649
-77.5232	-21.6948	75.2342		-51.6918	35.5174	57.1645			77.3125	20.7315	6.00233		-17.3027	57.2756	7.06998
-80.8663	-14.637	75.1827		-52.4909	39.3316	56.8635			76.7572	9.22399	6.43302		-18.2667	56.9926	7.09608
-77.1283	-24.0184	75.3809		-51.3841	38.6173	56.9479			79.1902	-0.521749	7.12926		-17.4118	58.9435	6.93352
-74.3008	-30.1451	75.4006		-51.8363	35.536	56.9398			80.5905	0.71222	6.56533		-12.481	61.9241	6.82043
-68.7259	-37.1652	75.61		-52.0222	41.4624	56.7261			80.4605	8.13416	6.70105		-18.7602	59.1992	6.74667
-70.5508	-36.7213	75.5616		-54.6062	41.139	56.6818			82.1271	8.47258	7.25675		-20.068	58.4109	6.80359
-71.3877	-38.3093	75.6468		-50.5699	56.4645	73.5762			81.6044	7.31719	7.64439		-18.0818	57.3272	6.76546
-70.6444	-41.2897	75.8623		-52.1186	57.9528	74.0321			77.0559	12.1717	8.15216		-18.4548	57.3589	6.68827
-72.9332	-38.565	75.8417		-56.5091	40.9394	56.3463			75.8278	19.6855	7.97211		-13.5941	58.1476	6.48802
-71.4974	-40.0517	75.9872		-58.3755	38.932	56.491			73.8263	23.7645	8.33365		-15.0049	56.3966	6.44431
-68.96	-41.8164	76.2234		-53.3108	36.8494	56.2699			69.562	30.1813	8.58304		-17.4666	58.3066	6.30068
-76.2623	-36.0758	75.9035		-53.3779	38.7113	56.2097			67.996	35.4533	8.57439		-18.9118	57.8345	6.15851
-71.1164	-40.0542	76.2515		-53.7002	37.6741	56.1671			65.746	31.3086	8.6975		-19.8435	58.8997	6.20637
-68.9833	-45.3355	76.4376		-53.3729	34.7377	56.0768			62.3608	38.2355	8.31673		-21.1822	58.9796	6.1204
-65.0098	-48.9248	76.672		-52.4766	38.3234	55.8108			62.6521	43.286	8.30078		-18.6493	60.0618	NaN
-65.461	-49.4753	76.5708		-50.1816	40.4667	55.5619			64.4048	36.1461	8.67393		-18.1725	58.1179	6.05034
-63.5329	-52.0006	76.6778		-44.5268	54.6848	72.6771			63.329	38.4838	8.10416		-15.4043	61.9979	NaN
-60.3727	-54.92	76.7958		-50.9357	37.8579	55.6525			63.8361	38.9272	7.94184		-17.5078	56.9911	NaN
-57.6703	-58.6744	76.9461		-47.8864	38.5542	55.2882			63.1753	40.3965	7.72916		-17.1225	58.5067	7.49365
-57.2502	-59.8938	76.9482		-46.0406	41.1113	55.0489			61.4242	37.5475	8.07118		-16.9879	48.1706	6.57587
-55.2765	-61.9418	77.1268		-47.6721	33.7065	55.1915			35.2638	49.3439	7.14427		-18.0042	48.5372	7.22813
-55.3569	-62.5813	77.0834		-46.9413	33.4811	55.1019			33.8658	51.2206	6.98987		-20.0874	45.4974	7.70992
-54.7216	-61.0279	77.2985		-47.5221	30.7708	55.1401			33.8559	53.6487	6.79138		-18.5337	46.9444	8.22188
-58.8761	-59.0375	77.2558		-48.9397	29.4421	55.0817			32.9926	55.0834	6.62945		-15.4203	47.8985	8.12488
-61.819	-55.4067	77.5231		-44.8742	34.7633	54.7667			35.053	52.3489	NaN		-20.4752	39.1856	8.41134
-34.3246	-78.617	79.1671		-47.1462	30.7895	54.8985			42.6405	44.5138	NaN		-19.2288	34.8456	8.48731
-38.8974	-76.8127	79.9137		-48.0584	31.9143	54.7711			50.3774	37.761	6.25183		-17.8771	35.8109	8.79855
-38.7039	-77.6484	80.1412		-45.9632	33.3422	54.6398			52.265	36.1138	NaN		-18.9785	39.7995	9.37583
-40.4716	-76.6824	80.3454		-47.525	32.8894	54.6353			56.1238	32.2104	6.00636		-18.2633	40.144	9.44866
-41.2511	-73.8305	80.6613		-46.9193	29.7698	54.7847			56.3843	34.4948	NaN		-18.632	39.651	10.1131
-48.658	-72.2634	80.5282		-45.8114	33.519	54.2716			58.1686	34.5964	NaN		-16.8246	39.5162	9.95389
-49.6079	-70.0981	80.7342		-46.0802	34.7307	54.2212			57.2237	36.3263	NaN		-16.437	40.1659	10.5855
-49.1479	-68.6251	81.0064		-47.024	32.4626	54.319			56.9282	38.4172	NaN		-20.8205	39.7362	10.5725
-53.3635	-64.4924	81.1398		-48.1134	31.2593	54.3647			53.607	45.3562	NaN		-18.4646	37.725	10.4266
-57.0349	-59.0616	81.2415		-48.3903	30.7825	54.331			55.0172	43.4355	NaN		-17.7608	36.6568	10.3309
-60.7202	-53.3298	81.3693		-47.8215	32.9023	54.1406			57.0601	47.6047	NaN		-18.6669	38.7189	10.0591
-66.5482	-47.1186	81.4255		-46.8812	34.4375	54.0293			54.9675	48.4513	NaN		-20.4969	37.3602	9.97828
-68.9471	-43.5288	81.6768		-46.1835	33.5135	54.0535			57.5913	41.8007	NaN		-17.903	38.0618	9.41282
-70.1296	-37.1939	81.931		-46.4841	33.4423	54.0649			62.277	45.4416	NaN		-19.1745	43.4667	9.71685
-72.0832	-35.0501	81.8421		-49.2718	30.6797	54.1563			68.8695	39.9577	NaN		-23.0336	40.5613	9.85569
-66.9549	-46.5678	82.0202		-49.64	33.7123	53.9861			76.2767	33.4937	NaN		-22.2832	46.3388	9.32797
-60.324	-54.8096	81.9744		-49.2044	32.7188	54.073			71.6995	35.0472	NaN		-21.4756	53.4688	10.0989
-54.0211	-61.3409	82.4768		-46.9339	36.1468	53.9755			69.2766	48.7537	NaN		-21.2093	53.4228	9.73713
-60.8257	-55.8569	82.4515		-48.0296	37.8463	53.871			65.2545	53.8385	NaN		-24.012	49.8725	9.26585
-63.0688	-51.0259	82.6688		-48.813	37.0925	53.8546			65.7737	55.4932	NaN		-26.7323	60.2244	9.18249
-66.7887	-45.5505	82.9022		-50.9125	37.4237	54.1788			66.3869	58.6561	NaN		-30.388	57.0184	8.99459
-53.5188	-63.575	84.368		-50.3787	35.0906	54.2			77.24	40.3731	NaN		-35.2689	51.8485	8.80379
-53.294	-62.9745	84.5412		-50.3262	38.0044	54.1225			82.1629	29.5263	NaN		-35.9911	51.4438	8.52829
-53.8331	-63.8982	84.6206		-51.6233	37.6191	53.9486			-10.6267	75.7738	17.0537		-40.3781	47.6776	8.38118
-84.0405	-13.267	86.7135		-50.4414	37.1205	54.1602			32.0979	33.9336	NaN		-40.8644	52.7508	8.747
-82.7577	-15.4692	86.8761		-49.3961	32.9837	54.2381			31.8085	24.341	NaN		-42.4796	48.6484	8.60739
-84.5872	-17.2014	86.9146		-50.2056	33.7664	54.2186			35.3566	18.09	NaN		-45.6032	46.172	7.8727
-82.0714	-17.8404	87.0295		-51.008	33.8429	54.2245			35.6513	17.1552	NaN		-43.9621	49.0211	8.29156
-82.6354	-15.2225	87.1754		-49.206	35.4943	54.0283			33.8794	20.9871	NaN		-46.9961	48.101	8.0903
-82.4455	-14.2714	87.3915		-51.6508	40.0424	53.8294			27.0026	25.9745	NaN		-48.0693	48.1872	8.01849
-83.751	-13.9951	87.5167		-50.2746	34.1455	54.0071			30.511	26.2597	6.35378		-46.4273	52.087	8.33775
-80.3735	-25.4644	87.5922		-52.2116	38.3247	53.865			29.3457	29.8036	6.28767		-45.9117	53.9759	8.48875
-71.9596	-41.9894	87.7355		-52.522	37.5484	54.1477			23.7815	39.8976	6.09587		-47.0463	53.8711	8.43524
-59.544	-60.2795	87.7942		-50.5923	39.6308	54.104			34.7861	32.1193	6.53529		-47.6682	53.0727	7.90406
-50.5153	-67.8432	87.9141		-47.6013	40.3742	54.0909			30.4084	41.2375	6.59461		-49.5392	51.6004	7.95085
-55.0178	-62.5341	88.0711		-42.5805	36.7166	54.4296			39.1256	34.2228	6.9266		-49.6696	51.3401	7.87466
-59.891	-59.3584	88.0566		-37.8449	34.176	54.6838			36.7423	39.268	7.00009		-51.8435	49.7231	7.88259
-66.538	-53.9572	87.9813		-35.4904	34.0761	54.7253			41.1563	43.0454	6.55353		-48.7737	55.7205	7.58118
-58.6384	-56.0194	88.3854		-36.2983	34.7028	54.8905			41.6669	43.2195	7.17914		-52.7475	52.6146	7.79321
-56.9603	-58.1103	88.427		-32.7663	34.4816	54.4793			38.7162	47.332	7.26615		-50.8071	54.1223	7.69727
-54.955	-63.3737	88.2678		-30.8234	34.7161	54.5837			39.5831	41.2766	7.89105		-52.9953	50.9712	7.8223
-54.9708	-61.9989	88.4188		-32.2092	34.2307	54.4796			40.5899	42.609	7.95105		-52.8557	51.7462	8.07068
-60.1035	-58.0135	88.3703		-34.2592	31.8311	54.7222			39.5064	43.8532	7.81363		-51.9225	53.2457	8.03192
-63.5042	-54.3323	88.7074		-34.1277	30.8175	54.3874			40.7936	43.0245	7.86914		-53.503	52.53	7.81125
-66.3786	-52.0152	88.9377		-29.976	33.1429	54.3173			42.8267	42.3133	7.7735		-54.0686	54.2531	7.70535
-63.1756	-54.4127	89.1339		-34.143	33.5168	54.33			39.8139	44.6536	7.65136		-53.0923	55.2961	7.46244
-60.8949	-56.9135	89.2446		-32.6278	32.7421	54.4442			42.2096	44.9267	7.39717		-56.8673	56.2025	7.30304
-58.0594	-61.8642	89.1375		-32.4484	32.8515	54.2504			41.3007	43.4095	7.58132		-58.2745	51.2292	7.11217
-60.4809	-60.8905	89.2099		-33.4106	29.4932	54.5829			42.5683	45.526	7.27897		-55.7066	57.3541	6.9175
-59.7085	-60.2933	89.4187		-32.9515	30.9924	54.4526			52.251	40.0538	7.32239		-59.7133	54.5668	7.10052
-61.4985	-59.7746	89.4341		-32.9249	33.9168	54.3086			51.9186	38.0608	7.10307		-54.2286	61.5768	6.66645
-61.533	-56.6008	89.598		-35.7234	32.2785	54.5377			51.1447	33.3211	7.14762		-58.4389	56.9767	6.8964
-63.7967	-58.0758	89.2779		-34.4641	31.322	54.3757			51.9855	36.2911	7.1639		-59.6669	52.1548	6.71896
-61.1329	-58.7956	89.5504		-34.4037	33.3792	54.2407			46.7219	38.5871	6.98558		-58.2151	53.8915	6.58861
-61.1976	-58.9514	89.6364		-34.4047	33.0961	54.4279			48.7897	38.2256	7.10224		-55.7595	56.8455	6.43286
-62.7091	-58.4271	89.7543		-35.8966	30.1023	54.7323			44.7904	40.2252	6.93379		-63.3489	51.5319	6.4566
-62.8367	-59.8443	89.8679		-33.5817	32.5517	54.6222			44.871	40.5957	6.84019		-55.5821	63.2941	NaN
-60.0093	-58.3745	90.1028		-33.0196	33.5844	54.5197			44.7832	42.9295	6.96555		-58.534	55.9524	6.14715
-59.1824	-59.6578	90.1491		-35.237	33.0011	54.5664			40.1689	45.4507	6.64965		-61.2136	50.7201	6.32246
-57.7941	-62.7942	90.1526		-38.0453	33.9222	54.5987			38.0825	47.6499	6.64147		-62.3704	53.0306	NaN
-53.168	-67.085	90.3632		-36.9239	34.0024	54.5745			37.2273	49.0613	6.5829		-63.696	56.4748	6.11797
-49.025	-68.3997	90.5176		-36.6431	34.206	54.7277			34.9498	51.9698	6.47632		-62.019	56.2079	6.12164
-49.8185	-71.0812	90.4404		-36.8686	34.0702	54.7748			33.8397	53.1027	6.15136		-64.4115	59.523	NaN
-44.9072	-73.471	90.7222		-38.1124	35.134	54.642			35.6455	53.8993	6.24777		-55.6805	58.5112	NaN
-43.2596	-73.6074	90.7296		-39.3225	36.6131	54.6472			35.308	53.5731	NaN		-49.0749	57.4779	NaN
-38.7651	-76.5607	90.8346		-41.0292	37.8343	54.6669			34.7289	53.2566	NaN		-54.1058	54.9035	NaN
-33.9746	-80.0625	90.9403		-41.0721	36.3492	54.7228			41.5141	51.5053	NaN		-48.4317	68.4484	NaN
-30.9934	-82.7755	90.9274		-19.7042	40.3889	54.6894			47.3859	45.9152	NaN		-55.8786	58.4475	NaN
-44.3729	-75.9252	91.8771		-18.3203	42.4404	54.6819			44.1108	46.1056	NaN		-56.5426	56.8643	NaN
-37.6172	-80.6706	92.1336		-15.0737	41.1266	54.5425			44.528	51.9142	NaN		-57.1715	58.3108	NaN
-32.9654	-82.8305	92.2158		-12.8592	41.6637	54.4481			40.1595	43.7415	NaN		-59.6272	56.0913	NaN
-26.8489	-84.0005	92.4333		-14.8988	41.3406	54.3947			32.5643	48.9211	NaN		-68.6763	57.2745	NaN
-25.7503	-84.1869	92.5627		-13.8201	40.3998	54.3694			38.3156	41.0977	NaN		-67.3386	28.4503	NaN
-22.8285	-84.4162	92.6984		-14.284	38.8777	54.4637			36.5067	33.107	NaN		-80.7375	21.4542	NaN
-20.8181	-85.0505	92.8297		-14.01	38.8677	54.5601			36.4882	28.8999	6.6032		-45.9938	-33.7478	NaN
-34.7185	-80.3916	92.9733		-15.5185	39.6066	54.6154			33.6	28.7531	6.48666		-47.3931	-25.4881	NaN
-44.8684	-74.2477	93.191		-14.2755	37.7771	54.6449			28.6684	38.5251	6.6851		-54.7885	18.8658	NaN
-56.6817	-66.8092	93.292		-15.7594	37.489	54.6442			33.3694	33.6877	6.92731		-54.7235	43.9544	NaN
-56.0722	-66.142	93.4199		-16.8736	35.1916	54.6246			34.4976	30.5313	7.03714		-61.1442	25.9134	NaN
-49.3597	-70.0638	93.539		-15.1561	36.7728	54.5328			26.7414	40.0249	7.18006		-59.9285	7.55866	NaN
-42.5065	-73.6487	93.7668		-15.9125	37.263	54.5168			27.9741	32.8993	7.51161		-60.9788	42.9453	NaN
-40.1298	-74.8488	93.7581		-15.1968	37.0351	54.4884			27.6515	36.6875	7.37384		-64.0067	34.5792	NaN
-38.6868	-77.3445	93.853		-13.9076	35.4847	54.5947			29.7825	34.4314	7.51203		-62.9821	28.2789	NaN
-37.9871	-77.0973	93.9966		-15.1013	37.5104	54.3445			25.4379	37.8041	7.73429		-69.8097	31.8071	NaN
-36.3344	-76.1434	94.2084		-14.7248	38.1384	54.2753			28.7878	44.3366	7.95858		-71.4452	40.6292	NaN
-44.2213	-72.9062	94.3255		-15.3699	37.4735	54.3049			-27.6227	36.0362	28.1479		-66.6765	31.8441	NaN
-52.3268	-65.7881	94.4974		-14.9758	37.2005	54.2688			-26.3677	35.7586	28.216		-61.951	22.498	NaN
-60.4024	-59.0012	94.5647		-14.5105	36.1456	54.1478			-24.7732	35.7902	28.1899		-58.8405	21.9932	NaN
-60.7298	-55.9636	94.8494		-13.7349	34.1335	54.2768			-24.0105	41.5318	27.8762		-61.9051	17.6298	NaN
-67.6274	-53.0974	94.7573		-14.4148	35.952	54.19			-24.0586	40.0284	27.9031		-58.6035	22.3945	NaN
-67.8909	-49.2925	95.0438		-16.0236	34.0271	54.3476			-23.3645	40.0658	27.8377		-63.4624	29.3286	NaN
-71.9051	-43.1967	95.057		-15.5948	33.8209	54.1981			-23.2504	37.2359	27.9568		-57.7544	21.0951	NaN
-68.7535	-51.613	95.0994		-15.3044	33.8061	54.0454			-22.7864	41.9384	27.5204		-61.468	21.7718	NaN
-65.8855	-54.4417	95.2144		-16.9783	35.8904	53.9614			-24.2786	41.1805	27.3856		-61.581	21.4092	NaN
-61.7399	-60.4161	95.9632		-15.9819	34.464	53.9645			-23.6325	39.2743	27.4037		-57.7831	26.4788	6.17237
-66.527	-52.463	96.1468		-15.3798	34.2835	53.8968			-22.3672	41.1925	27.2044		-55.7017	22.0757	6.23153
-70.5193	-46.883	96.385		-15.3509	32.7843	53.9397			-23.6257	42.4069	26.9868		-54.7203	27.2599	6.40746
-75.2805	-40.2194	96.4636		-14.4078	32.3332	53.776			-22.2384	41.4992	26.8423		-51.3257	26.3778	6.34866
-76.7767	-37.6223	96.4906		-17.4471	33.4248	53.8988			-23.3134	40.6339	26.7421		-51.9492	27.8668	6.68963
-71.5375	-48.9232	96.539		-15.6976	32.2871	53.788			-23.1734	42.4649	26.4908		-51.8673	31.1396	6.98707
-60.5317	-61.5204	96.9198		-15.7726	31.7076	53.7925			-24.294	42.3265	26.2991		-51.4825	31.212	7.0801
-50.3648	-72.5999	97.0703		-15.2149	31.8676	53.7399			-26.8254	41.4165	26.0993		-52.2504	28.5511	7.26471
-44.9435	-73.9957	97.1653		-14.3541	31.8576	53.6228			-24.7477	40.243	26.018		-55.945	31.3127	7.23629
-38.0988	-79.5128	97.261		-16.1754	30.6553	53.8879			-20.549	41.1651	25.8395		-51.3627	35.6909	7.53839
-33.4389	-83.1827	97.2814		-16.06	31.6031	53.7144			-18.6616	40.5023	25.6375		-53.4452	38.0534	7.39627
-29.3043	-82.4878	97.5791		-16.4494	29.6438	53.7912			-15.4102	37.5169	25.6027		-53.3057	39.2806	7.21406
-35.2242	-80.17	97.5601		-17.0846	31.3481	53.6808			-15.5921	37.2649	25.5603		-56.8365	38.4338	7.1684
-35.4155	-80.0412	97.743		-17.669	31.3922	53.6431			-18	38.9388	25.3686		-54.5676	33.5055	7.25765
-35.8835	-79.319	97.8784		-19.1049	31.5792	53.6679			-18.774	40.391	25.2103		-54.4986	34.6825	7.32545
-32.6543	-81.8898	97.9406		-19.841	31.3661	53.6987			-17.3271	39.3306	25.1648		-51.6766	34.5237	7.35231
-33.6399	-81.7618	97.9989		-18.5519	31.6593	53.6137			-15.7064	41.111	24.9968		-53.5464	33.5495	7.22336
-28.0389	-83.1377	98.2051		-17.9883	32.4439	53.5577			-12.6276	40.9486	24.9522		-55.2749	38.1067	7.53373
-32.3205	-82.1389	98.2901		-17.7117	33.7187	53.4399			-9.70948	42.1532	24.8201		-57.3502	38.3975	7.31044
-35.7452	-79.3353	98.3317		-18.1193	32.3055	53.5303			-4.60069	44.9349	24.5924		-55.1876	36.4831	7.41149
-40.9884	-76.1115	98.9224		-18.6591	32.1127	53.5673			0.346209	44.0725	24.519		-58.2257	37.5558	7.1529
-47.6792	-72.6185	98.9484		-17.517	29.9714	53.6466			3.84048	45.6318	24.351		-54.3009	39.2046	6.98135
-58.1016	-65.4775	98.9991		-15.5305	28.8989	53.618			6.96267	43.9321	24.2489		-56.4502	38.9057	6.71106
-63.5689	-59.1175	99.2359		-21.277	31.9136	53.4892			5.95243	43.8465	23.9184		-54.2614	40.7769	6.4436
-65.6616	-53.5875	99.4394		-20.9313	32.2116	53.4094			7.10101	42.1109	23.8595		-54.8893	41.034	6.08868
-54.1588	-68.868	99.3988		-20.3784	31.1521	53.4269			6.27906	38.5603	23.6869		-58.6157	39.5482	6.10945
-34.0362	-79.4391	99.529		-19.3289	30.7093	53.4015			10.6539	33.0488	23.5112		-57.4994	40.7719	NaN
-12.7627	-85.7629	99.6699		-17.9571	31.704	53.2812			13.03	27.886	23.3068		-66.5661	32.1995	NaN
-18.3821	-84.4298	99.8273		-20.4264	31.0086	53.3919			14.0239	23.4683	23.1165		-67.0855	29.9027	NaN
-32.1665	-79.1233	100.071		-20.3	32.8966	53.3016			17.9915	22.408	23.0013		-64.8514	37.4908	NaN
-45.2677	-73.9539	100.133		-19.9935	33.0913	53.252			21.6381	22.3261	22.73		-66.9507	38.9309	NaN
-51.9555	-68.5757	100.368		-17.1639	34.2633	53.0821			28.9291	20.4068	22.7321		-64.6605	41.8979	NaN
-56.4632	-67.4067	100.203		-19.9601	33.9774	53.3125			21.5653	26.3572	22.4426		-65.0618	43.0531	NaN
-58.3526	-64.909	100.353		-19.1449	35.3317	53.144			17.7678	32.068	22.3776		-64.0705	44.662	NaN
-60.2651	-63.0922	100.421		-19.6403	37.4027	53.01			13.9192	39.9549	22.0692		-65.4597	46.5128	NaN
-54.3554	-68.6421	100.512		-20.1722	37.5885	52.8954			11.664	45.1402	21.8574		-65.1235	48.5637	NaN
-47.7961	-72.1279	100.761		-17.3986	35.5762	53.064			10.1219	45.6904	21.6108		-62.3469	50.6177	NaN
-39.076	-76.1342	101.068		-19.934	36.3744	52.9911			10.3481	44.4007	21.4435		-71.7142	50.1986	NaN
-45.9747	-73.145	101.073		-18.7886	36.5315	52.9418			8.81077	45.2608	21.0933		-68.6526	53.6406	NaN
-54.3928	-68.1736	101.179		-18.8131	37.5981	52.8046			12.2689	43.4796	21.0773		-65.4317	58.6406	NaN
-60.593	-62.122	101.379		-20.119	37.2741	52.8107			15.6751	42.9578	20.7363		-60.6466	63.0508	NaN
-67.3925	-53.3975	101.416		-19.6717	36.0483	52.9126			19.838	42.6668	20.4836		-53.1547	50.8304	NaN
-66.9424	-51.9497	101.583		-18.0107	39.2335	52.6943			24.8818	39.0597	20.4218		49.6568	25.9799	NaN
-69.9114	-50.7919	101.619		-18.3419	38.2422	52.7591			23.9372	41.3344	19.9203		57.546	48.4308	NaN
-69.9886	-49.1579	102.061		-19.123	39.2374	52.7105			26.7522	37.9611	19.8773		22.375	34.8941	NaN
-70.3625	-49.5981	102.041		-19.9713	37.2503	52.8624			27.4775	37.3208	19.6148		9.56837	41.4459	NaN
-67.9255	-51.6226	102.354		-16.5298	37.6653	52.6948			26.6008	37.9758	19.3153		9.44566	33.3095	NaN
-66.9663	-53.6303	102.419		-18.1463	37.6737	52.7642			25.8202	38.4698	19.1316		-0.851128	40.0335	NaN
-65.6651	-54.4223	102.624		-16.8622	38.1505	52.6389			24.293	37.422	18.9658		-10.728	67.367	NaN
-69.8006	-51.2563	102.623		-17.6555	38.5326	52.7595			23.6725	38.1822	18.776		-15.0294	57.2416	NaN
-71.5514	-47.138	102.724		-16.1782	39.624	52.6581			22.5417	41.016	18.5171		-20.3631	61.5196	NaN
-73.838	-43.6463	102.815		-13.082	38.8642	52.5632			22.6825	43.2111	18.3167		-31.5948	58.4701	NaN
-73.3958	-46.5674	103.07		-9.8948	36.8887	52.6466			20.6615	42.7209	18.1961		-36.6567	45.3816	NaN
-67.9135	-53.7132	103.392		-6.34536	35.3614	52.6145			22.0155	42.5176	17.9725		-44.5605	45.5405	NaN
-65.8323	-54.5866	103.408		-2.40934	34.2927	52.6295			24.6958	43.2249	17.7693		-41.1943	48.7596	NaN
-66.0233	-52.3318	103.605		-1.76906	37.1042	52.4333			23.8262	42.0287	17.5399		-38.3832	49.6216	NaN
-72.7941	-49.0484	103.381		-3.32399	36.481	52.5595			23.3536	46.571	17.0418		-32.162	54.636	NaN
-70.3593	-48.4425	103.973		1.00536	36.5253	52.5033			23.3094	43.49	17.0567		-40.585	57.4973	NaN
-71.9077	-46.9377	103.817		-1.09088	37.481	52.4101			22.409	43.0594	16.9051		-44.9363	66.2959	NaN
-71.2325	-50.3673	103.894		-6.00944	34.5768	52.647			25.2078	44.9652	16.5119		-41.302	70.9354	NaN
-69.6658	-53.7337	103.838		-6.31586	33.7784	52.5704			26.0961	44.2193	16.3218		-58.6096	52.9878	NaN
-66.0305	-58.3509	103.992		-5.71895	33.2668	52.599			27.9796	43.5394	16.1753		-54.3192	52.8299	NaN
-39.221	-32.9476	111.221		-2.95831	34.5808	52.422			26.6002	45.5082	15.9664		-54.5905	53.0268	NaN
-40.8166	-30.8611	111.09		-4.05758	35.4961	52.3646			28.6099	42.0829	15.8178		-63.643	48.9445	NaN
-42.0966	-25.2568	110.966		-4.2013	35.8557	52.3814			28.0446	43.3131	15.5785		-51.6702	57.6608	NaN
-42.7459	-22.8723	111.109		-4.00552	35.5764	52.321			29.0006	43.3686	15.265		-54.2681	66.0642	NaN
-38.262	-30.5018	111.242		-0.214642	36.4776	52.1724			28.2327	44.5831	15.0574		-61.0816	65.2976	NaN
-37.1626	-34.0184	111.05		1.29882	36.8337	52.1115			30.192	45.1878	14.7554		-73.8294	50.3549	NaN
-35.7222	-37.4381	110.942		1.36207	37.1476	52.1156			29.2707	43.9998	14.6507		42.2794	70.0951	NaN
-21.4266	-14.1848	108.085		2.28655	36.859	52.0451			29.7014	45.549	14.223		23.1756	52.8512	NaN
-26.633	-15.3505	107.94		4.73444	36.2333	52.1381			33.1787	43.6906	14.0611		19.7385	43.3168	NaN
-29.6824	-9.79194	107.716		4.58849	39.4817	51.8619			33.4925	46.1086	13.5993		20.9064	58.8698	NaN
-24.1152	-10.0229	107.956		5.55335	37.0281	51.9401			32.6621	45.6088	13.3752		13.2516	72.4902	NaN
-23.7834	-9.0071	108.085		6.3932	34.5085	52.0676			33.2438	42.3787	13.36		-17.2946	71.0601	NaN
-24.894	-5.11078	107.944		8.12018	33.1704	52.0601			35.5425	41.8905	13.0593		-26.9823	65.5538	NaN
-25.0527	-1.89752	107.958		3.4866	35.2763	51.8673			34.5224	39.9127	13.0539		-37.4046	61.8822	NaN
-25.767	-0.649641	107.878		-0.562819	35.1127	51.8868			35.9127	38.5499	12.6017		-28.0946	58.568	NaN
-27.1479	-1.96156	107.797		-2.7783	35.1047	51.8507			39.0667	33.9729	12.4668		-31.9148	65.0477	NaN
-27.2497	-3.38421	107.874		-1.89951	33.5095	51.8334			38.6904	31.5193	12.1732		-40.4998	63.4227	NaN
-27.8137	-5.92063	107.836		-2.54731	33.4265	51.8188			39.2374	32.4156	11.9204		-27.7243	84.1912	NaN
-28.6759	-4.09609	107.851		-3.63544	35.4478	51.6492			35.7154	36.7147	11.6207		-39.698	56.9593	NaN
-29.638	-4.83183	107.816		-0.994326	32.7178	51.6358			32.8735	42.5296	11.3879		-40.2385	70.8989	NaN
-29.6677	-4.17553	107.862		-2.84458	32.5187	51.6477			30.9881	46.4023	11.1828		-16.9612	87.8491	NaN
-34.6461	-3.79414	107.516		-2.98807	31.3439	51.6616			34.4713	46.4177	11.0385		76.8767	24.6828	10.5513
-31.3858	-7.7905	107.669		-3.19547	31.1932	51.6938			33.7803	48.7821	10.6269		79.776	30.1134	10.314
-25.9087	-9.35853	107.895		-2.98379	32.0697	51.6203			32.8474	51.2805	10.2931		76.6276	37.4186	10.1693
-26.2348	-11.191	107.835		-2.91164	33.1957	51.6054			32.66	50.9372	10.1225		77.187	26.4105	10.5492
-27.0955	-10.108	107.897		-3.52119	34.2835	51.6257			34.4881	49.4757	9.90584		72.2845	43.3277	9.92843
-26.4615	-6.43449	107.903		-3.34477	34.6404	51.6239			33.0477	51.7773	9.50705		77.1229	34.1058	10.2531
-28.008	-6.01294	107.852		-4.46482	34.9939	51.4625			34.3679	50.7769	9.34956		73.5549	30.3956	10.1528
-29.4813	-6.56504	107.951		-3.27679	33.3598	51.4988			34.0669	53.8238	8.94378		70.8459	40.7761	9.83117
-27.3306	-4.9785	108.093		-2.89572	33.6331	51.4383			35.1249	50.6893	8.89579		73.8063	33.4521	9.97732
-27.9752	-3.53212	107.943		-3.03476	30.1946	51.5919			31.7983	51.9849	8.6349		72.3666	35.7485	9.89481
-28.7669	-3.89114	107.926		-3.1357	32.2138	51.3844			32.9393	54.6833	8.20831		67.8657	37.8269	9.74516
-29.1482	-1.10927	107.824		-3.02964	30.9456	51.3008			32.9529	52.3164	8.04922		65.0795	39.2359	9.71456
-27.5177	-3.80737	107.997		-4.36297	33.5164	51.257			35.8455	49.9616	8.01167		54.5727	44.3132	9.64145
-29.4273	-4.36805	107.899		-3.01769	32.8831	51.244			35.9968	52.0183	7.57939		50.9063	43.579	9.4318
-26.571	-3.78874	107.976		-3.60465	32.8405	51.1829			36.2102	53.4042	7.34424		45.8286	43.2989	9.35974
-28.8949	-3.57058	107.8		-3.23552	32.338	51.1557			37.7194	52.7967	7.10639		46.9175	45.3697	9.27997
-27.1155	-5.12593	107.898		83.056	27.629	13.8318			37.1817	53.8726	6.77894		41.9759	44.0613	9.21645
-26.6847	-3.33063	107.895		79.293	30.7924	13.595			34.8272	54.4717	6.58588		47.141	44.7448	9.21316
-28.8924	-2.3309	107.737		75.9567	29.9903	13.5673			34.477	55.254	6.30451		52.536	46.1669	9.04292
-28.0074	-3.4283	107.769		73.9312	26.5787	13.7488			31.3811	56.0405	6.15956		43.8926	46.361	9.06617
-29.0245	-0.806638	107.618		69.6086	29.5117	13.4679			31.6905	59.2773	NaN		45.2716	51.255	8.69581
-27.4624	-3.8071	107.846		67.4308	28.3435	13.3932			34.0631	57.5165	NaN		43.7094	48.1917	8.8429
-29.4939	0.0384583	107.52		65.0386	27.2967	13.4018			33.0789	58.7308	NaN		45.7092	53.2364	8.56416
-29.0809	-5.22247	107.196		63.4186	23.369	13.2836			35.3094	64.3589	NaN		43.9013	54.0735	8.52886
-31.4447	-9.05244	107.088		65.8526	11.8809	13.2996			40.573	63.2731	NaN		46.8372	58.535	8.30246
-28.6627	-14.3216	107.135		63.1252	9.76484	13.0529			47.2505	61.79	NaN		38.8124	60.0079	8.15047
-29.9551	-14.315	106.958		63.079	2.33246	13.0481			46.159	60.8646	NaN		40.29	59.5537	8.18248
-28.5347	-16.2594	107.01		60.3572	5.65005	12.7937			50.4242	59.5582	NaN		27.4367	66.9489	7.56015
-27.7612	-17.807	106.957		54.711	7.15563	12.9308			72.641	51.4916	10.1719		40.3638	62.339	7.93628
-28.1281	-13.1578	107.044		52.3504	6.88307	12.8875			67.4119	49.6942	10.1571		36.8324	63.2723	7.77227
-27.5476	-11.1318	107.056		49.6616	7.56648	12.7613			62.391	55.3612	9.84465		34.2217	63.793	7.63084
-27.0784	-7.99544	107.195		49.3352	8.72856	12.5799			60.2192	57.855	9.59034		22.8804	65.4509	7.37619
-27.243	-4.28796	107.003		46.2403	11.0839	12.432			60.5188	56.7349	9.6119		24.413	65.935	7.33472
-28.5458	-4.6022	107.661		45.6975	5.05032	12.6584			59.3351	58.6401	9.3973		24.1461	72.2493	7.12379
-28.6269	-3.32529	107.324		46.5075	7.55666	12.3276			59.5156	58.5497	9.23675		16.4732	67.0148	7.19729
-26.5491	-5.87894	107.509		46.5271	7.61904	12.27			59.6669	57.516	9.14434		16.6545	71.0926	7.00096
-27.3613	-6.39253	107.408		47.105	9.5695	12.1264			60.3655	57.9857	9.0916		17.4337	74.1872	6.74726
-30.0828	-5.07223	107.188		47.4766	3.78296	12.2727			60.7376	59.7725	8.85557		10.3135	73.0851	6.7209
-29.3133	-5.42832	107.171		45.9425	-6.34335	12.781			60.4147	61.0578	8.71656		16.0431	71.5489	6.69742
-29.5149	-7.80709	107.272		47.4844	-2.54294	12.6244			57.2219	62.4846	8.63882		12.5124	75.1927	6.35894
-30.628	-4.86146	107.306		47.4544	-5.88696	12.502			52.7148	65.6702	8.46508		12.6398	76.8348	6.08206
-31.6825	-3.41192	107.288		45.9312	3.15984	12.095			53.8812	65.1039	8.30949		11.0986	80.3651	6.28996
-31.2193	1.03079	107.169		45.8015	-7.50791	12.4486			53.793	64.3556	8.33823		-3.03289	77.2381	NaN
-30.3566	-4.97982	107.242		45.7045	-0.107548	12.1806			55.508	60.6203	8.19936		-11.6248	73.9158	6.01664
-28.2721	-8.55942	107.226		48.687	2.63845	11.9241			56.0205	61.1064	8.15928		-23.1015	76.313	NaN
-25.5512	-12.2088	107.624		49.5606	2.42087	11.8825			56.4668	68.8661	7.81596		-9.45003	76.47	NaN
-24.1759	-3.87537	106.798		51.808	-8.46438	12.1754			56.0556	67.3149	8.06236		-18.1747	81.9983	NaN
-23.9269	-7.55958	106.658		49.9716	-10.9972	12.362			59.2011	67.4419	7.94175		-25.427	79.6679	NaN
-23.8466	-11.0989	106.344		49.5454	-9.35482	12.3934			58.8335	67.8702	7.88118		-29.8704	74.4131	NaN
-22.468	-11.8634	106.161		49.8441	-2.1805	12.1494			53.1661	72.4858	7.43495		-26.1356	72.8874	NaN
-20.8616	-13.457	106.815		48.9525	-1.00774	12.1525			49.7792	74.4797	7.29389		-31.7216	70.9392	NaN
-21.6974	-11.9854	106.689		47.4236	-1.02389	12.3045			58.7844	66.7312	6.51682		-36.3606	72.9987	NaN
-22.1558	-12.2124	106.611		46.372	-5.56526	12.5474			60.0169	60.7981	6.90727		-43.4378	69.4985	NaN
-21.3083	-13.3119	106.638		45.6588	-5.28538	12.6269			60.1759	61.8977	7.32748		-38.1244	74.7554	NaN
-22.659	-11.4188	106.484		46.0662	-0.328451	12.5993			62.5421	62.1303	7.62111		-61.2032	64.4962	NaN
-23.6405	-13.0368	106.167		46.0818	2.9552	12.5225			62.6727	55.1593	7.83037		-60.0084	63.1959	NaN
-26.2085	-10.1848	106.098		47.6081	-0.537885	12.7745			63.045	54.308	8.06767		-65.4385	57.4825	NaN
-25.0354	-10.2337	106.118		45.9818	0.189787	12.8134			61.7661	49.6455	8.38094		-65.9504	53.4878	NaN
-23.4669	-12.692	106.186		45.4366	0.292396	12.9729			61.9463	46.1752	8.55384		-44.5377	25.1842	8.31559
-23.1246	-11.3549	105.982		44.5228	11.837	12.6506			60.6445	43.1546	8.92388		-45.3883	29.7709	8.26676
-24.4651	-11.4629	105.846		45.8675	11.1177	12.4934			59.2755	41.5461	9.16573		-51.5405	31.357	7.5586
-24.9201	-11.1577	105.769		43.8047	9.74032	12.5816			56.217	40.9887	9.51216		-45.9907	28.0039	8.05878
-25.349	-11.1826	105.717		44.0538	6.61985	12.5942			53.3509	42.2511	9.66359		-44.5067	24.6911	8.18895
-27.4198	-11.2252	105.536		43.5567	4.90093	12.6728			49.8019	41.6113	10.083		-44.7704	26.0402	7.85843
-26.0843	-10.3603	105.515		39.7417	6.78776	12.6601			53.15	44.2658	10.2569		-42.8783	27.3953	7.84563
-23.3038	-12.9715	105.482		38.3697	8.77651	12.516			55.6729	44.1753	10.5819		-44.2445	30.3883	7.98237
-24.4467	-10.5448	105.343		37.2764	9.54504	12.4544			58.5828	49.4675	10.6083		-45.663	33.2961	7.46673
-24.4678	-9.5524	105.346		31.0174	11.9478	12.4597			61.5937	51.1475	10.752		-45.8515	31.1854	7.5052
-26.6072	-9.34475	105.211		26.7949	12.6593	12.3732			58.777	51.7594	10.7599		-48.0412	37.7564	6.55228
-24.0364	-6.47264	105.359		21.5388	12.7379	12.3322			54.4767	53.001	10.9119		-46.909	26.6207	7.10529
-24.223	-8.72855	105.435		17.5743	12.6976	12.2409			54.1425	53.684	11.3639		-38.2308	23.3682	7.58415
-24.1192	-10.5976	105.534		14.2201	14.451	12.0989			57.4692	53.819	11.3929		-43.3271	33.1978	NaN
-24.7103	-10.7258	105.434		9.9058	12.3436	12.1618			63.0321	52.2065	11.7907		-40.9164	25.7877	6.59621
-24.5446	-11.0028	105.514		7.36939	15.0479	12.0224			65.0753	44.5493	11.6592		-45.2487	28.0393	NaN
-24.5061	-9.19203	105.271		5.6284	11.3725	12.1095			63.7679	49.2569	11.3264		-40.6598	34.0739	NaN
-23.9732	-10.4832	105.439		2.6669	12.7119	12.0611			57.9102	50.7967	11.5945		-36.4138	34.8391	NaN
-24.4306	-10.2396	105.37		-1.27958	17.0912	11.7778			52.9778	52.2152	11.5479		-41.7832	33.5097	NaN
-26.2511	-6.8195	105.525		-1.19043	16.8369	11.6277			47.827	52.2088	11.8568		-41.4271	40.6521	NaN
-25.9123	-7.07208	105.469		-2.56415	14.4406	11.6682			52.9778	53.7267	11.9252		-39.1472	33.8283	NaN
-21.8232	-8.84902	105.74		-4.54503	14.3445	11.5712			54.8373	51.2213	11.7216		-37.8258	44.8567	NaN
-22.4831	-7.61904	105.65		-2.69401	13.9366	11.4444			57.9056	53.05	11.7898		-39.1306	37.9693	NaN
-23.0491	-7.4016	105.662		-2.65684	13.7487	11.3638			60.733	50.982	11.5856		-45.5233	41.0817	NaN
-25.0768	-3.44744	105.432		-2.09267	13.4332	11.4221			62.409	53.5338	11.5252		-41.2863	40.3756	NaN
-27.9394	7.24238	105.152		-1.35401	15.6745	11.1532			62.4483	51.4739	11.6622		-46.8449	41.0827	NaN
-27.931	4.75005	105.14		0.0175293	13.6492	11.1372			61.4722	53.9426	11.3884		-43.3078	40.4677	NaN
-27.3895	2.90808	105.201		-0.580728	13.1822	11.0878			61.1254	54.6179	11.3549		-40.7074	29.4728	NaN
-24.8354	-0.520056	104.73		-0.524734	11.9953	11.0282			62.4768	55.0483	11.0349		-52.4172	35.072	NaN
-24.4014	0.626412	104.729		-0.485175	11.3642	11.0131			61.5218	53.0119	10.7635		-44.754	35.9034	NaN
-25.3173	2.55047	104.744		-0.951962	11.4501	10.9347			60.9285	55.4724	10.2437		-49.3963	28.5759	NaN
-24.5817	4.17544	104.777		-0.209239	10.7731	10.8593			58.845	60.0551	10.0734		-40.4613	20.3208	NaN
-26.0454	2.02349	104.752		1.91999	10.7551	10.8315			58.9825	59.2972	9.96437		-48.5418	20.9234	NaN
-26.0776	-6.66447	104.83		0.372516	12.6737	10.6854			61.4714	58.1614	9.85544		-48.3115	19.8499	NaN
-28.4323	-9.80852	104.449		1.70248	11.1778	10.6556			64.206	59.9182	9.40331		-47.8253	24.6161	6.23114
-25.8132	-12.4447	104.701		2.06003	10.0465	10.6348			63.8086	58.9972	9.20462		-49.5477	29.3672	NaN
-27.6547	-7.36386	104.552		2.19659	9.95787	10.7145			61.5454	63.1782	8.81813		-45.624	25.2303	6.00233
-28.2991	-2.71223	104.375		0.228292	9.9219	10.7623			55.2931	69.0797	8.45709		-44.8082	18.9476	6.43302
-28.485	1.02488	104.334		0.855516	9.8421	10.7614			53.4589	68.1682	8.33463		-39.99	16.6946	7.12926
-27.9289	-4.39668	104.662		-2.85761	11.8701	10.5134			46.9724	73.3826	7.86381		-41.5973	19.6918	6.56533
-27.0482	-11.3608	104.81		-7.60775	13.044	10.4396			43.4065	67.4304	7.86118		-42.9652	21.8831	6.70105
-27.0588	-14.1453	104.615		-11.2336	12.989	10.4633			42.5225	64.9358	7.59961		-40.4446	22.9005	7.25675
-28.7885	-13.344	104.625		-13.8835	14.3372	10.1907			44.5159	63.832	7.28905		-39.6494	21.5624	7.64439
-29.3089	-12.9073	104.651		-19.4474	13.1687	10.2426			42.0207	63.7587	7.08261		-42.2784	21.2567	8.15216
-31.9359	-8.93027	104.407		-21.2493	12.4345	10.2377			42.4584	64.5361	6.89265		-41.4408	23.995	7.97211
-29.6578	-9.88799	104.465		-24.1872	12.9745	10.1842			40.664	64.9673	6.75635		-39.8794	23.634	8.33365
-29.9723	-12.2433	104.441		-24.4203	9.67152	10.2261			41.0101	63.4948	6.33754		-41.2798	24.3197	8.58304
-29.9134	-14.8232	104.412		-27.0274	12.2517	10.018			40.9033	62.6245	6.16062		-41.9208	25.9391	8.57439
-30.2142	-15.0273	104.202		-26.458	10.4946	10.1007			37.8126	64.5263	6.16187		-41.9417	19.9865	8.6975
-26.9027	-16.8472	104.348		-25.9297	9.87214	10.0809			40.9445	60.5436	NaN		-44.3282	23.1173	8.31673
-27.8911	-15.0494	104.17		-25.9267	9.02961	10.0827			35.5561	63.5665	NaN		-43.3312	27.1928	8.30078
-26.7461	-15.4321	104.13		-26.8166	12.3832	9.88002			33.9729	63.2062	NaN		-41.6087	21.2308	8.67393
-28.6713	-11.8802	104.128		-27.9952	13.3482	9.77812			34.817	61.0553	NaN		-43.5186	22.2274	8.10416
-30.2604	-6.6721	104.027		-29.3107	14.8485	9.69632			32.7711	60.7611	NaN		-43.1134	23.1749	7.94184
-30.1418	-3.56783	104.116		-28.4212	11.9153	9.8669			26.9533	60.6128	NaN		-42.7363	25.6293	7.72916
-30.7136	1.58764	103.975		-27.0152	10.5463	9.90456			30.5166	62.8654	NaN		-42.3674	24.2302	8.07118
-29.9586	-2.92275	103.905		-27.6865	9.84842	9.95905			27.4395	63.3942	NaN		-42.1856	23.0757	8.17606
-29.1169	-5.79284	103.853		-28.9746	13.9261	9.81325			28.8384	66.6676	NaN		-40.619	23.4579	8.0907
-27.5597	-9.11029	103.847		-29.1917	9.81385	10.0331			26.2167	67.5182	NaN		-41.1418	24.507	7.67073
-28.0266	-7.23661	103.733		-29.8907	9.18805	10.1758			31.2317	69.3624	NaN		-46.1453	25.3767	7.48056
-28.0306	-7.43543	103.795		-29.2679	10.0021	10.1901			31.4826	70.5892	NaN		-48.7293	27.2494	7.45723
-29.5161	-5.23831	103.471		-29.1507	9.10043	10.2682			33.0789	69.2347	NaN		-50.1883	29.3602	7.18381
-28.22	-5.13093	103.523		-29.6875	9.33007	10.3165			28.3995	71.0679	NaN		-50.5887	23.1464	7.28873
-27.3494	-8.70355	103.546		-29.37	9.0823	10.3693			27.3734	76.5404	NaN		-49.3295	26.1935	7.14427
-24.9775	-12.1286	103.666		-29.4782	6.99067	10.4843			24.3214	69.4199	NaN		-50.8417	26.5792	6.98987
-27.8259	-12.6878	103.371		-30.0132	6.12488	10.4921			28.2777	74.0083	NaN		-51.2171	29.7716	6.79138
-24.5464	-16.1788	103.471		-31.8156	7.62462	10.5988			20.2123	76.2742	NaN		-52.571	31.8853	6.62945
-25.3735	-17.6847	103.246		-32.4643	4.79348	10.8744			16.2675	80.1365	NaN		-56.0916	33.1159	NaN
-20.6936	-21.0668	103.447		-31.8585	7.29073	10.8756			16.7637	79.1938	NaN		-55.5821	30.3154	NaN
-21.9699	-17.5547	103.273		-31.16	5.6751	10.8103			19.9131	81.0834	NaN		-52.8421	31.1397	6.25183
-24.4701	-10.6097	103.173		-33.4345	6.85229	10.8677			12.9216	75.7886	NaN		-54.6932	30.9399	NaN
-20.9497	-11.265	103.272		-32.9228	4.76767	11.0212			19.1638	77.9616	NaN		-53.1294	26.8879	6.00636
-19.9447	0.947111	103.088		-34.0686	5.77643	11.1409			7.27739	85.9408	NaN		-56.7826	25.639	NaN
-18.8613	2.49054	103.158		-35.7511	6.46179	11.172			19.0267	84.7023	NaN		-58.0335	23.6752	NaN
-18.9446	3.31734	103.106		-36.4178	10.1986	11.3484			21.5629	77.4247	NaN		-59.005	23.7064	NaN
-18.5921	3.74424	103.201		-36.668	13.754	11.4			26.5217	84.7448	NaN		-58.2039	22.2887	NaN
-19.5862	5.60159	103.099		-36.7286	14.2328	11.6848			27.7717	83.422	NaN		-59.7976	24.9041	NaN
-19.4655	6.31396	103.096		-37.0631	12.681	11.6254			57.9092	53.43	NaN		-58.4644	22.119	NaN
-19.594	7.46003	103.654		-37.3827	11.7175	11.7873			57.3996	33.0903	NaN		-56.0097	27.4428	NaN
-18.9878	8.59348	103.709		-39.0263	12.9527	11.7426			44.9515	57.2488	NaN		-56.9758	27.2542	NaN
-16.5534	10.9875	103.763		-37.7796	12.3496	12.079			59.7542	55.1255	NaN		-55.0348	23.0114	NaN
-13.6155	13.4257	103.784		-35.8234	13.5904	12.1295			50.2072	71.4566	NaN		-56.5295	30.6838	NaN
-12.049	13.7382	103.883		-34.2696	11.2205	12.3059			55.5748	52.4537	NaN		-56.505	33.0431	NaN
-12.1629	16.0011	103.772		-34.2135	12.1235	12.4391			44.2696	62.8111	NaN		-55.5942	35.2929	NaN
-11.8024	16.0313	103.771		-35.7108	13.8161	12.6035			50.6842	53.911	NaN		-55.5967	29.2594	NaN
-13.8516	16.7669	103.68		-35.0133	12.321	12.8266			54.9498	61.551	NaN		-55.8012	36.1123	NaN
-13.9345	14.4727	103.549		-34.9324	12.7324	12.8842			53.3862	56.6742	NaN		-54.7426	36.2551	NaN
-13.3386	12.5712	103.609		-36.0518	9.93527	12.9784			56.3868	49.5396	NaN		-53.1778	37.7268	NaN
-14.4363	11.1079	103.585		-36.1589	8.07159	13.1621			54.2872	41.7179	NaN		-51.9018	42.2086	NaN
-16.0576	9.3342	103.549		-39.3334	9.25832	13.1893			58.1641	41.1905	NaN		-48.7152	44.9828	NaN
-13.6851	11.4994	103.536		-38.816	7.3175	13.5058			58.2673	42.1014	NaN		-45.4682	30.7943	NaN
-13.45	12.6428	103.774		-40.4413	8.56491	13.4112			50.8038	38.0604	NaN		-43.8455	26.8056	NaN
-12.8552	13.2848	103.725		-44.7037	12.6819	13.3474			51.8802	37.0941	NaN		-38.7259	33.1461	NaN
-11.9435	14.0253	103.578		-44.1052	10.1911	13.6591			50.5168	40.5026	NaN		-36.1425	29.3258	NaN
-11.7448	15.8627	103.465		-47.5171	12.0821	13.5751			45.0536	37.8334	NaN		-35.7897	54.7897	NaN
-11.1713	17.8218	103.497		-51.5516	12.3458	13.3665			46.3508	37.3768	NaN		-26.1996	62.8056	NaN
-11.6467	17.2441	103.41		-55.5454	11.8196	13.3434			41.5423	47.365	NaN		-25.5012	62.1013	NaN
-13.9629	15.783	103.383		-54.593	11.0151	13.3983			42.0616	49.951	NaN		-20.8815	55.6754	NaN
-15.7195	14.2979	103.294		-56.8077	9.79561	13.4627			36.9216	54.128	NaN		-9.50814	63.9143	NaN
-17.4728	14.6968	103.128		-57.3615	8.34773	13.4527			35.9007	54.0237	NaN		-6.226	65.9821	NaN
-17.5607	13.0425	103.181		-59.7442	12.5453	13.2603			35.8393	53.3834	NaN		-20.3618	53.0899	NaN
-17.0468	10.6816	103.305		-58.0891	13.3603	13.3696			36.839	52.6096	NaN		-13.5746	76.9654	NaN
-16.9955	11.5637	103.158		-61.0554	15.4999	13.2165			35.9147	58.815	NaN		-24.5432	59.1042	NaN
-18.9313	12.8128	102.92		-59.2512	14.5554	13.2999			33.7376	58.556	NaN		-15.0523	52.5109	NaN
-16.2653	11.3446	103.03		-58.9048	16.3685	13.1531			37.6384	58.5704	NaN		-8.52323	51.9807	NaN
-15.3437	12.4995	102.998		-58.6522	14.9366	13.1814			35.4343	58.8881	NaN		-11.463	52.1004	NaN
-14.5242	12.2857	102.971		-61.4644	12.1577	13.1332			29.9824	59.1001	NaN		-15.2325	55.4148	NaN
-16.6045	12.3053	103.006		-60.9672	12.948	13.0515			33.7463	53.3786	NaN		-11.2183	42.7327	NaN
-18.0947	8.01385	103.382		-59.9818	13.0878	13.0349			33.9495	58.2831	NaN		-14.2257	41.2812	NaN
-20.2584	8.5174	103.233		-61.448	15.0051	12.8136			29.9504	56.9253	NaN		-14.2834	43.4656	NaN
-17.1454	5.91909	103.271		-61.5718	14.3824	12.7688			28.2346	56.8684	NaN		-7.2593	40.7011	NaN
-15.6056	8.68907	103.14		-61.5502	13.9989	12.7236			31.2708	62.9252	NaN		-12.3684	41.5331	NaN
-14.5282	9.48551	103.068		-61.4253	10.5746	12.6146			28.607	64.275	NaN		-5.98619	38.9264	NaN
-14.2259	11.6125	102.938		-60.9978	11.639	12.4918			27.7595	64.2166	NaN		-8.73165	39.2789	NaN
-12.3315	10.8782	102.943		-62.5823	13.2066	12.1761			24.6463	67.6362	NaN		-6.84579	32.1371	NaN
-12.8264	12.8511	102.797		-61.7362	10.3468	12.1548			26.7405	62.1318	NaN		1.46572	38.108	NaN
-9.73134	13.6701	102.789		-62.6887	11.0883	11.9647			23.5173	60.9951	NaN		-0.145007	38.87	NaN
-8.92953	12.0352	102.732		-63.5707	9.67868	11.9235			23.2792	65.5958	NaN		2.53501	37.452	NaN
-10.2463	12.3459	102.577		-61.0006	9.44258	11.9195			27.8641	67.6532	NaN		5.40605	40.099	NaN
-9.51342	13.7382	102.543		-64.0059	12.6277	11.4504			25.868	63.0265	NaN		-6.47408	43.5938	NaN
-8.7744	13.0386	102.797		-61.9082	11.3984	11.5028			17.9431	64.7125	NaN		1.37944	43.2157	NaN
-8.34933	13.476	102.781		-64.1649	12.1092	11.3129			18.5366	64.5894	NaN		0.554703	42.7831	NaN
-7.25673	15.0915	102.905		-62.8446	14.4801	11.2062			21.9874	86.9652	NaN		5.32084	38.205	NaN
-5.28561	15.9772	102.657		-63.2119	15.0861	11.0438			39.3161	77.8321	NaN		3.32565	39.4162	NaN
-5.06224	15.9581	102.625		-62.9594	14.6231	10.7385			47.7701	68.643	NaN		2.57205	37.8869	NaN
-5.16074	16.4148	102.556		-64.805	17.3113	10.5649			46.098	76.8125	NaN		-3.63847	38.1293	NaN
-5.17477	14.67	102.618		-61.3128	16.4025	10.6224			52.2578	63.7268	NaN		-17.1134	39.4672	NaN
-8.0694	13.64	102.589		-64.5051	18.2339	10.3902			26.8882	79.8293	NaN		-21.2078	39.3617	NaN
-10.7164	13.4113	102.469		-62.6343	16.4192	10.2271			27.469	77.3392	NaN		-27.4072	42.8997	NaN
-12.8086	9.44718	102.501		-63.8898	21.5389	9.82365			31.8544	78.4773	NaN		-34.0668	38.7083	NaN
-13.7728	8.50345	102.721		-62.9234	18.132	10.0042			27.8692	79.8643	NaN		-39.108	42.9507	NaN
-13.3458	9.30843	102.274		-60.161	22.2421	9.56564			25.6377	81.921	NaN		-42.7547	44.792	NaN
-13.7511	12.5978	102.137		-61.2348	21.8289	9.41438			36.1962	73.0211	NaN		-44.7099	48.5867	NaN
-14.8108	11.3444	102.072		-57.0666	22.6	9.22799			37.543	79.2992	NaN		-49.3339	47.4685	NaN
-13.4725	8.56609	102.663		-53.9502	22.6957	8.93394			33.1878	78.7193	NaN		-60.1246	44.1424	NaN
-14.2536	8.54645	102.672		-49.0813	25.3061	8.58855			30.5355	72.3569	NaN		-60.4753	35.0864	NaN
-14.2158	8.35263	102.628		-51.5997	29.0674	8.14777			31.8218	67.745	NaN		-61.4145	30.011	NaN
-11.8865	10.3177	102.657		-48.5489	25.3627	8.19619			35.0801	70.3803	NaN		-61.9959	23.6499	NaN
-10.9863	13.8753	102.539		-49.1917	28.4477	7.79718			33.049	72.0556	NaN		-57.3677	12.6565	NaN
-9.02712	14.6113	102.555		-49.8869	27.0984	7.54543			31.7219	64.4918	NaN		-57.6009	14.5983	NaN
-6.15496	17.1959	102.719		-50.9849	25.8732	7.41491			24.2972	72.1583	NaN		-54.4401	10.9623	NaN
-8.67642	11.3887	102.976		-51.0325	26.2433	7.029			22.5887	77.9175	NaN		-55.5586	4.9759	NaN
-10.0047	11.8673	102.844		-50.9328	24.7648	6.82418			21.5397	76.2968	NaN		-53.7512	2.60589	NaN
-14.6401	11.4653	102.696		-52.3055	21.2826	6.83751			16.8006	82.8607	NaN		-56.3158	4.25786	NaN
-14.5417	9.18093	102.727		-52.9435	21.0531	6.58267			10.5911	80.0514	NaN		-57.1197	5.38642	NaN
-14.4624	10.4233	102.751		-51.2233	20.0872	6.59905			9.73411	77.4946	NaN		-61.704	6.28223	NaN
-14.6416	9.63931	102.815		-49.3438	20.4601	6.43073			7.80251	78.848	NaN		-55.5326	5.96328	6.35378
-14.1412	10.7776	102.651		-50.631	18.8712	6.53534			10.7734	71.6159	NaN		-57.8849	7.80386	6.28767
-14.4985	10.316	102.661		-47.2987	20.769	6.34374			12.6934	70.3231	NaN		-66.4515	17.5164	6.09587
-14.2179	12.0474	102.592		-48.8139	18.4865	6.53402			14.9075	75.5116	NaN		-60.6004	9.88633	6.53529
-13.471	12.125	102.644		-46.6585	18.5122	6.45822			10.7788	74.9465	NaN		-68.9213	18.5452	6.59461
-12.264	11.7054	103.349		-50.079	22.8983	6.01545			14.726	66.6692	NaN		-65.2555	13.1743	6.9266
-10.5626	12.6609	103.459		-52.4867	24.751	NaN			15.0759	69.9865	NaN		-71.3483	19.6514	7.00009
-10.0401	10.84	102.918		-51.4637	23.3907	NaN			17.1573	70.1839	NaN		-71.8708	27.1731	6.55353
-10.0781	11.2109	103.121		-51.4176	17.4606	NaN			4.86683	74.1693	NaN		-69.8681	27.681	7.17914
-11.5311	11.4575	103.047		-50.1306	20.365	NaN			13.2169	72.5762	NaN		-71.7276	29.6593	7.26615
-11.9499	12.8045	102.931		-55.8346	23.5592	NaN			14.3404	73.1551	NaN		-70.3845	21.1579	7.89105
-12.4691	13.4192	102.898		-57.6159	22.3733	NaN			16.4369	74.7311	NaN		-70.0638	22.6055	7.95105
-13.6094	13.0017	102.889		-50.8058	22.1734	6.19741			15.5696	76.7406	NaN		-72.1647	26.0159	7.81363
-14.669	11.8632	102.976		-51.2657	22.9472	NaN			20.8357	79.5532	NaN		-71.0618	28.8204	7.86914
-15.5826	9.79926	103.089		-52.9613	24.2021	NaN			25.7628	77.0136	NaN		-69.148	31.5751	7.7735
-14.828	10.3068	103.482		-48.0107	25.8156	NaN			22.8311	82.9555	NaN		-70.3069	32.3382	7.65136
-15.0093	10.7972	103.408		-50.0545	22.8586	NaN			26.575	78.1373	NaN		-67.7098	29.3085	7.39717
-16.6276	10.8371	103.354		-49.2205	30.9939	NaN			25.6262	80.9889	NaN		-67.964	23.655	7.58132
-15.6153	10.8011	103.347		-47.7013	25.5198	NaN			25.7985	79.8754	NaN		-69.6142	25.2788	7.27897
-15.0528	11.294	103.346		-47.2342	30.2373	NaN			17.95	84.3876	NaN		-63.639	25.763	7.32239
-14.6645	11.3181	103.462		-51.5367	31.8439	NaN			10.2212	83.6231	NaN		-66.5066	26.7437	7.10307
-12.8889	9.92911	103.406		-50.9619	27.9909	NaN			23.1342	80.2616	NaN		-67.7055	23.5085	7.14762
-11.41	9.82645	103.611		-58.1331	32.9508	NaN			4.789	81.1203	NaN		-65.1521	26.4837	7.1639
-10.01	9.40814	103.646		-52.2991	37.7214	NaN			11.8063	82.5374	NaN		-68.7029	24.3098	6.98558
-10.8103	14.8864	103.529		-59.0774	30.9565	NaN			18.5921	76.0094	NaN		-64.7373	23.5878	7.10224
-8.00626	13.1509	103.386		-55.239	45.985	NaN			0.587013	66.3724	NaN		-68.5584	23.3015	6.93379
-6.94962	13.3744	103.271		-66.0092	40.082	NaN			61.1623	65.9569	NaN		-67.5397	25.4488	6.84019
-9.12022	13.6138	103.194		-69.8311	48.8601	NaN			60.7006	64.3634	NaN		-66.342	30.0539	6.96555
-10.2915	14.1366	103.218		-67.5113	47.4867	NaN			59.5123	63.9829	NaN		-68.5874	31.9938	6.64965
-10.3148	11.7538	103.363		-65.2107	52.7047	NaN			56.4193	66.1402	NaN		-68.1851	32.477	6.64147
-10.1771	9.91986	103.467		-70.5989	51.6348	NaN			53.8769	69.5502	NaN		-67.5826	30.5591	6.5829
-13.3434	11.3112	103.32		-70.7772	54.363	NaN			50.4962	71.613	NaN		-68.3824	30.3615	6.47632
-13.7104	10.9432	103.31		-75.7773	47.8634	NaN			49.526	74.4661	NaN		-70.4757	30.0016	6.15136
-13.7683	9.72917	103.345		-80.8989	36.0197	NaN			47.3277	74.6262	NaN		-67.4733	32.2094	6.24777
-14.1677	11.0987	103.235		-82.3664	29.9226	NaN			50.4861	68.7304	NaN		-67.3345	32.0759	NaN
-11.3278	9.85813	103.027		-82.8551	-2.0143	NaN			50.3887	70.2896	NaN		-70.5021	32.8302	NaN
-10.4178	9.95439	103.13		-70.1611	-15.3087	NaN			60.215	62.6668	NaN		-68.3989	34.055	NaN
-10.9712	8.18548	103.12		-63.9688	-16.2429	NaN			61.0212	59.0987	NaN		-66.916	31.6752	NaN
-8.81045	15.3784	102.515		-62.4285	-19.3093	NaN			51.3104	69.681	NaN		-72.9886	30.4707	NaN
-9.15768	12.4711	102.557		-57.9683	-23.53	NaN			60.9044	58.98	NaN		-72.214	37.4255	NaN
-11.9594	13.9507	102.438		-60.5073	-16.8247	NaN			56.2952	60.9802	NaN		-76.278	25.0492	NaN
-12.6477	14.7465	102.289		-54.1861	-21.4871	NaN			60.5138	59.9041	NaN		-83.0494	27.4499	NaN
-12.8878	13.3734	102.309		-52.3258	-21.9048	NaN			55.7313	61.9422	NaN		-76.9308	19.7404	NaN
-12.5594	11.9588	102.385		-51.1253	-25.8366	6.01542			56.4067	59.252	NaN		-75.7875	9.37042	NaN
-13.6959	10.6953	102.32		-49.332	-31.5941	6.42845			55.9924	60.2041	NaN		-73.1535	5.16155	6.6032
-12.9258	10.8258	102.413		-48.1887	-37.4718	6.68776			56.2779	59.9051	NaN		-74.915	2.65531	6.48666
-13.1585	12.6041	102.346		-46.2335	-35.9992	7.0847			50.6835	60.8461	NaN		-80.9059	10.9005	6.6851
-10.6953	12.5868	102.454		-49.9087	-32.942	7.43724			51.284	64.1609	NaN		-75.3034	6.22333	6.92731
-10.9119	14.3583	102.293		-53.4342	-35.6654	7.56053			54.632	61.4532	NaN		-72.9092	2.09663	7.03714
-10.038	12.9545	102.362		-48.5815	-36.2548	8.25288			58.0866	66.0327	NaN		-80.7184	9.95708	7.18006
-10.0766	12.308	102.366		-50.0508	-35.7232	8.53587			57.2051	63.7015	NaN		-79.357	0.874556	7.51161
-10.4906	12.1009	102.351		-52.7895	-35.0229	8.70147			60.8055	59.4299	NaN		-81.5934	4.74036	7.37384
-11.4897	12.9114	102.277		-49.1815	-34.7565	9.17745			56.2707	61.0466	NaN		-80.9005	2.41396	7.51203
-12.6827	16.488	102.152		-51.3781	-31.0616	9.52359			54.6985	59.4986	NaN		-84.8356	4.50815	7.73429
-13.3537	15.698	102.18		-58.7903	-21.4205	9.40526			57.1445	54.1676	NaN		-81.5595	13.8816	7.95858
-8.5654	16.4455	102.325		-58.342	-19.4315	9.94403			55.2396	51.8646	NaN		-76.9245	13.4936	7.92243
-8.86603	17.0523	102.139		-61.3996	-16.8516	10.1349			55.2247	55.5812	NaN		-88.521	15.5771	24.5924
-8.38458	12.7275	102.337		-57.6947	-18.9848	10.5844			51.769	51.6539	NaN		-84.6191	15.2897	24.519
-9.22672	12.0852	102.354		-57.8829	-19.2176	10.8453			52.232	53.2143	NaN		-81.8925	18.5677	24.351
-9.97953	10.716	102.388		-60.5636	-17.5322	10.8457			55.5752	51.1284	NaN		-82.8517	15.449	24.2489
-11.0595	10.3939	102.315		-60.8116	-18.5215	11.2367			52.6366	53.7575	NaN		-87.8588	13.2375	23.9184
-10.5202	10.1287	102.393		-60.7628	-17.269	11.2164			50.9502	53.0994	NaN		-88.9095	7.92347	22.7321
-12.0386	10.6469	102.3		-59.5355	-18.4599	11.6637			57.7279	52.3197	NaN		-83.552	11.6057	21.0773
-11.7419	10.9206	102.317		-57.9826	-18.7999	12.0278			56.9334	51.774	NaN		-76.6091	12.1178	20.7363
-12.5897	12.8428	102.116		-61.6936	-14.9611	12.1781			55.6422	52.7742	NaN		-68.8932	12.9914	20.4836
-11.1971	11.9555	102.308		-63.5666	-12.1402	12.5556			55.2678	51.4646	NaN		-63.2289	10.7161	20.4218
-10.652	12.6492	102.273		-58.7289	-14.345	13.0229			54.8625	48.5746	NaN		-65.2306	14.0913	19.9203
-10.6832	13.0373	102.327		-62.8874	-10.8475	12.886			54.8793	44.999	NaN		-63.3783	11.9652	19.8773
-10.5096	15.2212	102.232		-62.2352	-6.41787	13.1831			49.2323	46.9939	NaN		-63.591	12.2189	19.6148
-11.1381	14.8237	102.217		-62.1024	-5.17181	13.4139			48.1399	49.8664	NaN		-65.2441	12.8115	19.3153
-11.3203	14.1524	102.229		-63.7612	-4.74283	13.7791			50.3646	54.4091	NaN		-66.7699	13.3382	19.1316
-11.2705	11.3203	102.365		-61.835	-2.95579	13.9632			48.2565	55.8427	NaN		-68.762	11.8052	18.9658
-11.7517	10.245	102.407		-63.8214	-1.05217	14.0604			46.8322	56.5339	NaN		-68.5282	11.3177	18.776
-10.9094	9.10231	102.41		-66.3019	3.13193	13.8371			41.8245	59.896	NaN		-68.7726	13.0524	18.5171
-10.746	9.13746	102.409		-65.11	5.49555	14.1485			43.2815	61.0493	NaN		-67.6791	14.474	18.3167
-11.8032	8.03819	102.367		-60.8939	6.82907	14.7421			44.9901	62.1719	NaN		-69.2728	11.8166	18.1961
-11.7313	8.57231	102.32		-60.5997	9.30508	14.9254			47.5091	59.0296	NaN		-68.8011	10.4872	17.9725
-11.5399	8.90384	102.301		-58.4192	8.97948	14.7554			45.9875	62.1781	NaN		-67.2838	10.7867	17.7693
-11.0971	8.50543	102.326		-56.2662	10.7022	14.4814			46.6703	62.6005	NaN		-68.4642	7.69332	17.5399
-10.8087	8.17028	102.326		-53.3995	7.51279	14.8166			48.6707	61.6354	NaN		-69.7139	13.7582	17.0418
-10.5986	6.82264	102.564		-49.8652	5.22393	15.1595			47.4781	62.9381	NaN		-69.2298	10.7292	17.0567
-12.3692	6.8687	102.43		-49.8376	7.13383	15.2318			50.1774	64.2625	NaN		-69.9182	10.4744	16.9051
-13.4409	7.34345	102.358		-51.2799	8.52441	15.1961			42.7923	65.2265	NaN		-71.0474	10.0559	16.5119
-13.06	8.53323	102.222		-49.4317	10.7018	15.6746			41.8977	66.8472	NaN		-73.9686	3.36396	16.3218
-12.8348	9.18403	102.195		-46.7758	9.22747	15.9022			49.686	68.6479	NaN		-75.5084	-3.03529	16.1753
-12.4067	9.49462	102.197		-46.959	13.5078	16.0114			44.9156	67.4024	NaN		-79.1565	-2.8884	15.9664
-13.6009	9.43986	102.153		-48.7018	13.6489	15.8465			41.2755	70.2647	NaN		-75.7602	2.96182	15.8178
-15.1691	9.32206	102.074		-46.2187	10.5517	16.2605			46.6995	69.8131	NaN		-75.1481	12.7851	15.5785
-16.4462	9.85398	101.955		-45.1029	10.8084	16.536			46.0028	68.0461	NaN		-71.9754	21.5185	15.265
-17.7082	10.1388	101.869		-47.9884	12.8653	16.5821			50.5418	71.5744	NaN		-73.6411	17.7134	15.0574
-17.9294	9.92917	101.806		-48.008	17.0417	16.5865			46.0695	74.1028	NaN		-72.7344	14.1267	14.7554
-18.2725	10.6515	101.761		-46.6403	21.1051	16.342			49.7668	69.6694	NaN		-73.3791	6.92921	14.6507
-14.7787	8.02015	101.942		-49.0752	28.244	15.9935			51.7003	70.8555	NaN		-74.4755	6.21032	14.223
-15.211	5.51333	101.965		-46.5174	29.6032	16.1104			51.0164	73.7109	NaN		-72.5484	5.1863	14.0611
-16.063	4.15794	101.899		-43.0947	30.2288	16.2194			46.9262	76.7264	NaN		-74.5124	7.16917	13.5993
-18.2528	3.46006	101.742		-42.3123	29.9372	16.1547			32.2807	80.16	NaN		-76.1673	4.92482	13.3752
-16.7784	1.28772	101.892		-39.7376	26.6352	16.2569			30.9616	81.9376	NaN		-74.3827	-0.156444	13.36
-17.2212	5.5788	101.763		-41.1619	25.6027	15.9725			17.4957	84.7085	NaN		-72.0834	-0.861165	13.0593
-17.9864	6.80436	101.716		-39.9743	27.2688	15.9277			25.1701	84.4966	NaN		-71.7863	-5.2699	13.0539
-19.4982	8.37612	101.615		-38.3816	27.2517	15.9866			23.6606	83.6335	NaN		-72.3414	2.35742	12.6017
-18.4117	9.08013	101.486		-36.1628	28.2968	15.8481			25.5517	84.607	NaN		-70.1815	8.67287	12.4668
-17.5832	7.80584	102.446		-39.9129	29.4147	14.9941			24.5732	79.8068	NaN		-70.9756	16.3872	12.1732
-18.6752	4.54218	102.578		-33.6155	24.048	15.4688			28.0641	79.5833	NaN		-70.2271	17.0295	11.9204
-18.7344	6.99099	102.367		-37.643	26.8973	14.9846			29.2552	79.1097	NaN		-72.8798	6.62639	11.6207
-18.4368	5.05584	102.503		-37.1812	25.2516	14.9836			34.8774	82.7905	NaN		-74.1218	-2.91224	11.3879
-18.7541	6.62035	102.395		-36.5037	26.9534	14.6261			34.563	79.3875	NaN		-73.1083	-13.8002	11.1828
-21.3556	3.98475	102.227		-34.4718	24.0784	14.6109			31.8038	83.6599	NaN		-70.9786	-12.7964	11.0385
-22.7085	3.09053	102.005		-36.2517	24.5849	14.4657			34.4027	82.4656	NaN		-72.9763	-12.3663	10.6269
-23.4584	0.214256	101.716		-31.9473	19.2517	15.0102			32.2445	77.8627	NaN		-75.1501	-11.8569	10.2931
-21.1754	-4.27729	101.899		-30.5033	17.5845	15.1309			31.6709	79.3689	NaN		-75.7999	-5.15759	10.1225
-23.3542	-5.28498	101.699		-30.7733	14.5884	15.3952			28.6023	78.4703	NaN		-73.5018	5.53468	9.90584
-21.1186	-6.40195	101.685		-30.7408	14.4624	15.5246			25.8529	81.962	NaN		-73.0804	18.533	9.50705
-20.7285	-7.00882	101.5		-30.7687	11.3977	15.7806			27.4117	77.5099	NaN		-69.1485	25.0827	9.34956
-19.712	-8.52931	101.575		-29.8844	9.54042	16.0331			26.8895	75.4402	NaN		-68.7069	28.5906	8.94378
-20.6156	-5.64506	101.45		-30.2253	9.08462	16.1712			30.592	76.446	NaN		-66.8062	25.2591	8.89579
-21.6396	-2.29051	101.066		-30.9389	9.46206	16.2493			31.0042	82.1314	NaN		-69.0369	25.2245	8.6349
-19.7263	-3.28323	101.143		-28.7933	5.03985	17.0752			31.8267	78.4185	NaN		-68.4689	29.2523	8.20831
-21.8124	-0.451977	100.905		-26.983	3.4817	17.4619			30.8135	76.6967	NaN		-68.9216	26.6635	8.04922
-20.8195	-2.68256	100.926		-24.5238	-0.763161	17.7246			20.5748	80.048	NaN		-66.7951	25.0659	8.01167
-22.7586	-0.188715	100.76		-26.1269	-1.01409	18.2318			23.3126	76.9819	NaN		-66.8741	27.2192	7.57939
-21.2575	-2.11598	100.755		-24.1359	-2.70221	18.5784			27.1385	75.4465	NaN		-66.4914	28.2552	7.34424
-19.803	-5.03286	100.779		-22.8287	-4.44689	19.1505			30.4801	79.0473	NaN		-65.1304	27.3875	7.10639
-18.6288	-6.5022	100.747		-21.2018	-5.17433	19.6473			33.5484	75.2046	NaN		-65.2666	27.9585	6.77894
-22.2973	-8.43126	101.278		-24.6852	-3.63415	19.856			34.5199	70.3136	NaN		-65.1131	28.1626	6.58588
-22.9543	-10.4957	101.239		-25.1384	-5.69009	20.474			34.5135	67.6588	NaN		-63.2435	29.6087	6.30451
-22.476	-12.6509	101.255		-31.7057	-4.36879	20.6766			37.2149	69.7947	NaN		-63.7121	30.0188	6.15956
-22.7878	-15.2177	101.197		-36.2641	-3.18022	21.2454			36.9319	68.3249	NaN		-64.0892	33.9251	NaN
-23.0801	-12.8355	101.076		-32.4586	-8.61537	21.8276			37.4631	70.4143	NaN		-62.2254	32.9223	NaN
-22.5825	-9.56328	101.123		-31.8725	-4.79741	21.892			32.3754	71.1926	NaN		-64.0196	33.5501	NaN
-21.3357	-7.48209	101.176		-30.9439	-5.25409	22.3311			32.4877	76.1896	NaN		-64.2554	40.8736	NaN
-21.0329	-8.22662	101.127		-33.0823	-2.06432	22.369			32.4118	80.0846	NaN		-61.4513	42.1169	NaN
-22.1711	-9.33889	100.993		-37.6162	-1.09484	22.6424			31.064	77.5556	NaN		-57.5262	44.148	NaN
-21.2052	-11.4102	101.071		-33.3021	-5.77872	23.438			35.3301	82.1818	NaN		-61.3003	41.9953	NaN
-24.1108	-10.5165	100.692		-33.3308	-2.5958	23.5926			62.9933	62.0844	NaN		-58.1483	44.2322	NaN
-20.8553	-12.1879	101.504		-35.1849	-0.204778	23.9012			54.6408	68.1136	NaN		7.50784	5.45912	6.40656
-22.4502	-10.5704	101.231		-31.6174	-0.535	24.097			52.2043	69.1082	NaN		4.79493	13.5871	6.40142
-22.323	-13.3263	101.278		-33.0958	2.25486	24.2305			58.4192	61.3571	NaN		8.38653	9.5831	6.69042
-23.1361	-11.8514	101.23		-31.2243	-0.417662	24.6783			49.4598	68.4242	NaN		5.51103	10.4635	6.97584
-23.1739	-12.4597	101.254		-33.0332	-0.312029	25.0777			58.0138	68.1275	NaN		1.42855	14.332	7.10794
-23.0245	-13.0017	101.243		-31.5679	-1.61901	25.4925			52.2524	70.8071	NaN		1.68763	12.8229	7.38045
-24.3025	-11.4998	101.151		-32.1276	0.509384	25.773			46.4559	75.8044	NaN		-0.724611	17.5289	7.5503
-23.7155	-10.3961	101.133		-33.7495	5.45244	25.6311			47.0399	73.9376	NaN		1.61719	16.846	7.81063
-23.7652	-7.95352	101.037		-32.4977	7.11503	25.9471			46.4118	71.9758	NaN		3.80514	13.886	8.08827
-24.0958	-7.06896	100.991		-30.9801	4.28354	26.5851			44.495	71.0297	NaN		2.63074	15.6616	8.2787
-24.947	-7.89612	100.973		-29.2578	9.4566	26.6577			44.6373	72.7349	NaN		4.57849	12.4857	8.72181
-25.3461	-5.73836	100.871		-28.3216	11.0241	27.0776			47.8667	68.6102	NaN		2.10675	20.8812	8.70798
-24.6998	-5.49275	100.865		-27.7047	13.8797	27.438			43.8273	67.835	NaN		2.41198	20.9482	8.9533
-26.5297	-5.79287	100.796		-27.4977	13.4499	27.903			40.6115	71.0941	NaN		3.91538	21.1822	9.13203
-26.3485	-5.20707	100.882		-28.3103	16.7961	27.6516			45.7895	65.8088	NaN		0.57423	27.184	9.62368
-25.4099	-5.52531	100.841		-25.3836	14.6192	28.5274			42.0412	70.0114	NaN		4.88109	26.4822	9.85872
-23.0905	-7.15299	100.94		-27.7032	16.1192	28.6197			43.2516	67.4816	NaN		4.76515	27.4577	9.99175
-22.6207	-3.87265	101.03		-29.4466	16.3327	28.6744			45.199	66.2368	NaN		1.33698	29.342	10.3816
-21.5055	5.54199	101.318		-29.19	15.0781	28.9796			48.8984	62.948	NaN		-1.58676	30.8173	10.5315
-21.5398	7.74067	101.276		-32.2386	15.8607	28.4517			46.524	61.1522	NaN		-5.27342	35.7579	10.502
-21.8044	8.73785	100.766		-29.8961	13.3725	28.7479			43.8833	67.8459	NaN		-8.58638	33.1477	10.4426
-23.0248	6.08772	100.79		-28.6629	13.0075	28.6311			44.3088	68.234	NaN		-12.9725	33.413	10.3832
-21.4299	6.00849	100.741		-29.1005	16.2014	28.3465			43.4387	68.0505	NaN		-17.4165	33.3294	10.3348
-18.7977	6.07771	100.885		-27.7003	15.6832	28.1761			41.1331	69.7896	NaN		-19.3753	32.5868	10.2308
-21.8191	2.86259	100.739		-24.1636	12.9412	28.4393			40.4115	72.0037	NaN		-24.5339	32.0115	10.1719
-20.8403	3.59433	100.652		-24.3418	12.299	28.3711			36.3544	76.7343	NaN		-29.2781	29.3123	10.1571
-19.924	-0.997424	100.819		-24.4579	15.0527	27.9305			42.1602	77.6757	NaN		-33.4704	33.3797	9.84465
-20.6829	-0.812943	100.667		-24.921	14.618	27.8888			39.1726	78.1819	NaN		-34.8361	33.93	9.59034
-21.4067	-3.42115	100.647		-26.8614	15.5881	27.944			36.7727	80.162	NaN		-34.1823	31.6748	9.6119
-20.6828	-2.44688	100.493		-24.2629	13.1722	27.9066			36.1817	80.0355	NaN		-34.5193	31.8304	9.3973
-20.3818	-4.09598	100.904		-22.3816	13.9846	27.9047			38.3122	77.9568	NaN		-34.1655	31.2525	9.23675
-20.0417	-6.47987	100.968		-20.76	13.6458	27.9852			40.6224	73.7603	NaN		-34.3039	30.554	9.14434
-20.3077	-8.33863	101.076		-19.0137	13.0699	27.9556			43.3344	75.2349	NaN		-33.6466	31.3726	9.0916
-24.9412	2.70148	100.469		-18.1571	14.1012	27.7921			45.8872	72.1415	NaN		-32.9571	33.2927	8.85557
-24.408	-1.86361	100.625		-19.6994	14.0077	27.784			45.3931	72.202	NaN		-32.0478	34.0467	8.71656
-26.7994	-0.239196	100.462		-18.5428	14.0437	27.7809			43.5034	69.5375	NaN		-33.6115	34.1428	8.63882
-27.4534	-4.56133	100.377		-18.4832	12.2772	27.7038			44.1066	69.2608	NaN		-35.8987	35.4704	8.46508
-24.5855	-4.1898	100.496		-15.6117	14.8651	27.4762			43.0761	72.1784	NaN		-35.247	35.1908	8.30949
-25.4402	-4.68543	100.38		-20.4107	18.005	27.0473			40.7545	71.6474	NaN		-36.0606	34.5946	8.33823
-23.8365	-4.2884	100.316		-16.675	18.1129	26.97			43.8631	73.2401	NaN		-35.8482	31.7664	8.19936
-23.6821	-4.00663	100.375		-17.3445	17.8448	27.002			42.0212	71.4619	NaN		-36.526	32.87	8.15928
-24.3684	-6.39754	100.213		-16.2527	21.0549	26.7066			38.7995	71.2297	NaN		-36.6601	41.4654	7.81596
-22.7529	-6.74199	100.224		-18.3465	23.6032	26.1111			42.8649	69.0736	NaN		-39.2257	41.0008	8.06236
-26.1897	-6.11242	99.898		-15.2583	21.1697	26.4363			44.9281	66.4861	NaN		-38.3786	42.9414	7.94175
-19.4392	-8.51081	100.333		-16.299	20.3928	26.1747			47.2335	66.2885	NaN		-38.5472	42.3394	7.88118
-21.9505	-8.4368	100.171		-17.6145	21.4985	25.9504			46.5203	71.3439	NaN		-37.3695	43.3184	7.63648
-21.5277	-4.99584	100.155		-16.0678	17.5562	26.087			40.4884	79.3583	NaN		-38.1934	41.2584	7.56919
-21.3726	0.236608	100.226		-19.7484	19.4469	25.5758			20.7084	83.7744	7.14842		-40.84	43.5908	7.45952
-21.458	7.18065	100.203		-16.3168	17.9187	25.8232			18.6418	85.1806	6.92217		-41.443	42.011	7.43495
-18.9141	14.2948	100.098		-18.0194	19.5845	25.529			20.5107	85.221	6.83933		-43.3576	42.6987	7.29389
-21.3392	12.8455	99.9906		-14.4996	18.7234	25.5328			21.1115	83.2601	6.84013		-42.3457	43.4994	7.16223
-21.9145	11.1182	99.9318		-14.3787	18.0211	25.5026			24.3372	83.2964	6.62589		-42.5751	40.3951	7.09509
-21.2801	7.42511	100.044		-14.2518	16.5901	25.4393			24.603	78.6218	6.80338		-41.9118	39.4686	6.94173
-23.368	0.625768	100.128		-12.6019	17.8035	25.3043			27.4559	81.6842	6.41728		-44.3017	41.137	6.74332
-24.4027	1.66586	100.055		-14.2131	20.1976	24.9922			17.293	78.2405	6.82248		-45.1308	40.1073	6.86447
-24.5099	1.28202	99.9941		-13.3127	18.9246	24.9039			26.4907	77.8492	6.64538		-42.4567	43.2681	6.72509
-25.2313	0.0218588	100.046		-12.3765	15.531	25.0933			21.3339	78.3921	6.65452		-42.7256	41.8569	6.65211
-25.6177	-0.482923	100.051		-13.9752	15.9934	24.9425			23.7954	77.2418	6.54901		-38.6505	41.2386	6.53503
-26.0676	0.839333	99.9839		-15.3932	13.9721	24.8633			14.0618	77.3105	6.56037		-41.8584	34.3431	6.51682
-26.4013	1.74867	99.9016		-15.9223	17.5932	24.496			20.9689	76.1415	6.51366		-41.8204	27.3952	6.90727
-25.1027	2.41856	99.9323		-12.5795	15.2802	24.5348			19.5701	76.3314	6.55447		-40.8549	26.9886	7.32748
-24.194	3.65384	99.8914		-17.9897	14.3243	24.5068			17.6959	75.8676	6.53181		-39.0918	29.8849	7.62111
-24.638	6.09759	99.7957		-19.3732	17.685	24.1406			14.9308	78.1015	6.46072		-40.8826	25.5495	7.83037
-24.616	9.09972	99.7159		-22.9273	16.6182	24.0005			11.7129	76.6693	6.47182		-41.3413	26.902	8.06767
-23.7422	10.0465	99.8009		-26.5567	14.0869	23.9146			12.5028	74.1989	6.45638		-42.4469	22.791	8.38094
-22.8325	12.4743	99.7483		-29.1804	15.0442	23.6065			10.2469	72.9691	6.2751		-41.2567	19.6434	8.55384
-26.5542	4.7048	99.7029		-32.5605	13.1204	23.4161			10.9933	70.3281	6.24758		-40.9822	16.4063	8.92388
-28.3823	-3.54179	99.5985		-33.594	11.9812	23.3073			10.4427	68.6941	6.29578		-40.2329	14.71	9.16573
-26.8988	-12.1754	99.579		-36.5038	12.8955	23.1073			10.1137	67.2223	6.36039		-39.7893	13.8302	9.51216
-26.7786	-11.931	99.5286		-34.2	11.2753	23.0408			7.1114	66.5566	6.26236		-39.3706	14.7663	9.66359
-26.6974	-7.14124	99.5396		-41.398	14.9209	22.648			4.4308	64.759	6.35335		-39.0771	13.6298	10.083
-26.7809	-2.23219	99.4793		-41.644	15.6295	22.3672			0.645749	64.4317	6.41323		-39.2763	17.4477	10.2569
-26.0701	-0.918147	99.6254		-39.3913	13.6271	22.3953			2.98709	64.4454	6.3958		-40.2106	18.1506	10.5819
-27.4055	-2.55242	99.5196		-38.637	14.6639	22.1356			-0.535515	65.0342	6.3168		-40.5754	23.9922	10.6083
-27.8993	-4.20079	99.4472		-38.8067	15.1235	22.0716			1.2867	67.2693	6.33451		-37.1806	26.0481	10.752
-25.8868	-7.93347	99.5787		-37.4529	14.9154	21.8276			-1.18783	65.9425	6.35405		-36.6879	25.3444	10.7599
-26.8945	-7.50269	99.4731		-37.8249	16.6593	21.4418			3.7776	69.4197	6.23831		-37.3672	24.5656	10.9119
-26.0245	-8.73819	99.5188		-34.8891	11.7545	21.7069			-0.332793	71.0124	6.16904		-35.6675	24.9519	11.3639
-25.7626	-8.8873	99.5177		-33.7231	10.9328	21.465			-3.3444	70.3137	6.16062		-36.1002	26.2374	11.3929
-27.8726	-9.18395	99.0747		-30.8745	9.3684	21.3186			-3.29365	70.0512	6.27778		-34.1642	26.8668	11.7907
-25.2817	-7.16013	99.1532		-29.6185	8.09718	21.2177			-5.02696	72.2459	6.0962		-35.3611	20.6941	11.6592
-24.7713	-6.1368	99.2942		-28.7358	6.65359	21.2885			-3.48615	70.6407	6.23118		-34.3118	24.5734	11.3264
-25.0887	-4.51727	99.1474		-26.1066	5.67074	21.4216			-3.26842	69.7669	6.36507		-35.2653	23.8804	11.5945
-26.3687	-2.13786	99.0497		-25.3663	3.92128	21.5688			-3.67239	68.4773	6.32363		-35.1893	23.4661	11.5479
-23.8953	-1.26953	99.0497		-25.0935	5.48553	21.5144			-2.59062	67.3726	6.35796		-37.9504	20.4819	11.8568
-26.7816	0.607138	98.6912		-20.983	3.63174	21.7498			-3.2044	71.9283	6.10162		-37.0396	21.9957	11.9252
-21.0861	-11.8037	98.6368		-22.2012	5.85417	21.8032			-8.54075	67.6071	6.12761		-39.1147	18.4615	11.7216
-20.7437	-13.1961	98.6557		-19.4607	2.17495	22.0531			-8.00305	69.3014	6.09468		-39.9621	19.6914	11.7898
-20.1921	-14.4555	98.6672		-18.614	2.51311	22.068			-7.12722	67.078	6.09424		-38.2129	19.1121	11.5856
-19.9853	-13.8068	98.3758		-16.2578	0.174206	22.268			-5.16527	67.2981	NaN		-36.8465	22.4406	11.5252
-22.3414	-12.3414	98.3483		-14.2917	-1.62137	22.5228			-3.09979	68.0163	NaN		-37.5236	21.1275	11.6622
-23.4808	-6.86305	98.2692		-14.206	0.920098	22.5707			-5.82014	66.745	NaN		-38.3696	23.0766	11.3884
-23.5249	0.221477	98.2115		-11.1227	1.13744	22.6988			-8.69705	63.2744	NaN		-38.788	23.1074	11.3549
-21.019	2.85017	98.26		-8.434	0.77189	22.9168			-6.58825	64.8486	NaN		-37.8528	23.3733	11.0349
-20.9262	7.21398	98.2011		-7.2494	0.901945	23.1389			-5.70895	66.5193	NaN		-39	20.6561	10.7635
-20.1282	13.4782	97.9725		-5.42254	-1.21867	23.4585			-4.37997	66.3314	NaN		-38.4608	21.9455	10.2437
-22.5331	5.79992	98.3023		-4.97594	1.13824	23.5747			-2.54877	66.7901	NaN		-38.67	24.8115	10.0734
-21.1105	8.69551	98.3151		-3.80211	0.392893	23.8388			-1.75206	68.2301	NaN		-37.7656	23.2868	9.96437
-20.7564	6.42476	98.2895		-3.5511	2.6791	23.8818			0.324897	63.6473	NaN		-36.1531	23.2585	9.85544
-21.2857	8.34634	98.4954		-1.09831	3.2818	24.013			-0.0512439	67.4846	NaN		-34.1534	26.1223	9.40331
-19.9565	9.46273	98.6783		0.250019	2.15833	24.4296			2.01764	65.1524	NaN		-35.2123	25.72	9.20462
-20.3542	8.43609	98.5982		0.793574	3.36693	24.6107			-1.95002	60.4946	NaN		-36.1749	28.736	8.81813
-19.4901	7.0099	98.67		1.86786	4.09559	24.862			-1.81205	65.8137	NaN		-39.2556	31.88	8.45709
-20.5935	5.60145	98.6817		2.22201	5.52517	25.067			1.29416	63.6787	NaN		-40.0633	29.6546	8.33463
-21.6148	3.48943	98.6182		4.61791	4.45173	25.5044			3.24104	61.5636	NaN		-43.5846	33.103	7.86381
-23.2859	-0.0764918	98.5597		6.29382	1.8856	25.8333			3.36902	65.8775	NaN		-48.0958	30.6532	7.86118
-20.2972	0.746234	97.8301		8.6512	3.58215	26.1762			-0.432977	63.8546	NaN		-49.7772	32.4915	7.59961
-19.3367	-0.457199	97.8629		9.17561	2.54927	26.3853			4.37085	63.8527	NaN		-48.5733	36.2564	7.28905
-18.8426	2.5074	97.8084		10.1345	2.76525	26.63			4.70017	63.4211	NaN		-51.4863	37.1497	7.08261
-21.3552	-4.89316	96.5987		10.9073	3.46887	26.8907			4.51125	67.9966	NaN		-51.8012	38.1659	6.89265
-21.9793	-2.39663	96.7742		12.1394	4.19219	27.2233			1.2203	69.4968	NaN		-54.114	38.5081	6.75635
-21.9334	0.926526	96.7261		13.8171	2.78174	27.526			1.45482	68.7835	NaN		-55.709	36.9075	6.33754
-22.2165	3.81885	96.6503		14.2591	5.33591	27.8524			3.73034	67.7	NaN		-57.5529	35.3283	6.16062
-21.9096	-0.273427	96.7094		15.7001	6.17032	28.2605			9.37305	71.2034	NaN		-60.8187	36.238	6.16187
-20.7864	-2.25915	96.6614		16.5122	5.46168	28.8405			9.90903	70.2117	NaN		-60.9234	31.5261	NaN
-21.7746	-2.60733	96.6421		14.924	8.98668	28.9723			10.4625	69.0397	NaN		-65.1855	32.7882	NaN
-22.5544	-3.49588	96.4133		14.5303	8.13848	29.3882			11.929	69.6026	NaN		-66.923	30.8073	NaN
-22.3184	-2.95157	96.3918		14.673	11.0718	29.824			10.7875	71.742	NaN		-67.1555	27.0116	NaN
-23.3176	-2.37814	96.3014		15.4946	8.65152	30.5065			11.0226	70.9468	NaN		-69.3731	26.4565	NaN
-23.5546	-1.69642	96.2229		17.9427	10.3941	30.9698			13.7649	67.588	NaN		-74.4279	26.7598	NaN
-20.5089	-1.02087	96.5771		20.4847	16.3863	30.9794			13.0734	68.3897	NaN		-71.0657	30.5531	NaN
-23.607	-3.29401	96.2819		21.7127	15.4268	31.3777			13.9803	74.2069	NaN		-73.4038	31.8874	NaN
-24.0215	-4.23574	96.3016		24.037	15.1231	31.6983			10.1148	70.7825	NaN		-70.7051	36.2738	NaN
-23.4089	-6.0188	96.3879		26.0733	14.6513	31.8407			11.0663	78.0763	NaN		-71.8131	37.7414	NaN
-23.8787	-7.31908	96.2456		27.8451	13.9867	31.7465			12.0988	76.523	NaN		-66.7942	40.4109	NaN
-23.3965	-6.47086	96.0746		34.4914	13.5984	31.7679			8.05609	76.8174	NaN		-67.5252	42.4985	NaN
-23.1247	-6.15793	96.2271		42.8399	9.52098	31.9822			8.37071	77.5436	NaN		-68.3005	41.7213	NaN
-23.1754	-4.9187	96.5882		48.3968	10.0746	32.0564			6.48266	75.7039	NaN		-73.0889	44.0143	NaN
-22.617	-1.78264	96.3021		49.8933	7.26362	32.1706			12.3777	78.6333	NaN		-72.0104	50.5283	NaN
-21.7944	-1.27671	96.382		50.0442	4.94092	32.4553			7.68202	79.1422	NaN		-76.8177	40.538	NaN
-21.8148	-1.91072	96.4542		51.9098	8.02789	32.2357			3.03521	82.7824	NaN		-71.4862	45.78	NaN
-22.4789	-4.17607	96.4081		51.8175	6.11359	32.4799			5.35791	81.1728	NaN		-76.3434	47.3026	NaN
-23.8333	-3.90401	96.2092		52.5554	6.53629	32.5573			7.12129	81.6913	NaN		-59.1317	62.481	NaN
-25.4827	-0.945965	96.2593		53.8004	9.48023	32.5128			-2.8935	88.2855	NaN		-68.2845	57.7492	NaN
-25.1564	-0.901865	96.3024		52.0535	12.9392	32.5269			1.23327	87.915	NaN		-46.9786	72.3037	NaN
-25.5579	-0.788861	96.2299		53.1287	11.2241	32.9415			9.43574	86.101	NaN		-43.1786	75.2702	NaN
-26.5261	-0.568905	96.182		52.9504	14.3369	33.054			15.2632	79.9888	NaN		-43.5806	74.4438	NaN
-26.3097	-0.655954	96.1853		55.0504	8.44099	33.3814			10.1116	81.5755	NaN		-65.9683	45.2365	NaN
-27.9369	1.28369	96.3403		53.2318	11.8118	33.5633			15.0371	82.3567	NaN		-75.0785	26.5409	NaN
-25.9074	1.90789	96.3553		54.4664	8.02586	33.6185			17.9349	83.0311	NaN		-65.6589	50.2778	NaN
-26.5768	1.13615	96.2267		54.5062	10.6537	33.6658			17.867	85.6078	NaN		-62.8982	61.0276	NaN
-25.8928	-0.28594	96.2846		52.2617	14.9807	33.8566			11.1993	86.6169	NaN		-62.6926	40.7486	NaN
-26.1099	3.02385	96.103		54.4897	12.4576	33.9499			8.72066	87.5785	NaN		-66.3187	46.8279	NaN
-24.8364	5.52566	96.2781		51.8745	15.3791	34.1658			12.2568	82.2688	NaN		-61.7591	40.5941	NaN
-23.2992	8.4251	96.3662		55.5179	11.6842	34.3461			8.56281	85.7417	NaN		-54.0237	50.6765	NaN
-22.8885	12.0664	96.3298		53.3949	16.6917	34.5009			5.71027	84.6242	NaN		-54.9952	46.9113	NaN
-22.5469	12.2212	96.4507		54.4536	16.6127	34.6734			6.6839	77.5339	NaN		-54.2785	41.0737	NaN
-26.3135	10.7219	96.3489		57.3403	11.5584	34.9538			6.54814	80.3153	NaN		-56.538	32.6979	NaN
-26.9589	5.86431	96.4499		57.3921	12.042	35.247			7.58895	79.3632	NaN		-52.012	33.3203	NaN
-29.0797	7.17746	96.2796		58.1072	11.2235	35.5528			8.45362	83.5545	NaN		-51.8102	33.7401	NaN
-26.5557	9.28721	96.4341		59.8459	12.3565	35.7791			13.8173	80.035	NaN		-59.9602	26.1203	NaN
-27.0495	8.91999	96.2887		57.2296	14.9363	36.2051			2.17511	78.892	NaN		-59.0986	23.8644	NaN
-25.7717	9.58522	96.2505		60.754	14.1741	36.4367			18.0073	84.6332	NaN		-61.1938	25.7899	NaN
-27.1909	7.70777	96.3076		62.1598	15.2081	36.6622			13.2151	82.1057	NaN		-66.9408	19.9588	NaN
-29.212	-0.901819	96.0756		60.0668	15.5984	37.0527			10.8329	79.9415	NaN		-66.1207	18.2223	NaN
-26.8769	-1.94521	96.0617		60.546	14.2834	37.1549			7.38168	84.2022	NaN		-68.9022	26.9386	NaN
-30.1905	-7.23874	95.759		59.2477	15.5769	37.2433			5.32373	78.7093	NaN		-68.6892	28.3561	NaN
-26.2992	-13.4969	95.9471		58.0852	12.2807	37.6037			11.143	75.3526	NaN		-70.9609	30.1637	NaN
-25.744	-10.1669	95.8014		57.8728	15.871	37.7831			4.36886	73.7659	NaN		-72.4332	28.0006	NaN
-22.4436	-9.68	94.5861		58.6959	13.2507	38.088			2.66488	76.2678	NaN		-71.5273	25.2292	NaN
-24.7223	-11.4038	94.25		57.5721	11.7501	38.3825			-2.08884	77.597	NaN		-70.6336	23.6231	NaN
-22.5905	-6.93396	94.0036		57.8005	11.5434	38.6494			7.08257	78.417	NaN		-69.8869	30.1984	NaN
-21.8526	-5.53855	93.8889		57.5432	12.7329	38.6937			6.10681	79.7043	NaN		-70.992	28.6128	NaN
-22.8743	-8.82062	94.0561		55.3958	9.83494	39.0509			-0.196099	78.5848	NaN		-67.4224	29.811	NaN
-22.5131	-10.5447	94.1604		55.4279	11.586	39.1611			1.42175	77.1857	NaN		-69.1514	30.5786	NaN
-23.8728	-10.9705	93.8473		57.7362	8.11725	39.3036			5.83243	76.4965	NaN		-72.8958	30.7275	NaN
-23.4823	-9.39235	93.756		56.0888	9.81282	39.5341			4.40221	82.5743	NaN		-71.6582	24.8035	NaN
-26.1073	-6.09699	93.5017		57.0212	12.6533	39.7045			3.70095	85.6689	NaN		-71.5226	30.9282	NaN
-23.7413	-4.85967	93.8138		59.1192	9.28792	39.8711			-1.2322	84.6917	NaN		-76.2906	28.5456	NaN
-23.8649	-1.62504	93.4578		58.2872	6.35498	40.297			-4.26978	81.5475	NaN		-78.5519	28.151	NaN
-22.8651	2.00611	92.1236		60.3345	9.31882	40.258			-6.23355	78.1447	NaN		-75.0165	37.052	NaN
-21.565	4.92043	92.0445		59.5799	9.1557	40.4308			-8.53545	77.4583	NaN		-76.3405	38.8869	NaN
-21.9685	6.87455	91.9962		57.7186	11.741	40.6742			-7.36948	80.0967	NaN		-77.5686	39.4203	NaN
-21.0138	7.12354	92.0455		57.1265	14.7412	40.6595			-5.3355	78.5957	NaN		-65.2585	58.2572	NaN
-21.0632	6.54344	92.0357		59.0671	11.1757	40.8549			-9.09428	78.5609	NaN		-45.3429	70.1313	NaN
-20.9942	7.85846	92.0954		57.6664	15.2295	40.8535			-10.1942	79.5542	NaN		-45.3445	65.0961	NaN
-23.3898	7.90116	91.9373		59.6737	10.079	41.0582			-12.0257	76.8781	NaN		-57.9278	47.5955	NaN
-21.0764	7.82727	91.9384		58.5841	9.49787	41.3037			-11.4872	78.1515	NaN		-42.8818	66.2495	NaN
-16.9743	7.72995	91.977		60.667	7.72627	41.353			-2.90152	78.5516	NaN		-40.5353	69.1491	NaN
-10.6745	7.45786	91.9511		60.6811	5.03657	41.5095			-11.922	74.1308	NaN		-38.458	71.3157	NaN
-9.38924	7.44353	91.925		57.6667	10.3619	41.4595			-8.97573	74.3192	NaN		-38.5664	77.3551	NaN
-8.03905	9.37421	91.9116		57.0428	9.66829	41.6484			-10.6122	70.5606	NaN		-27.005	84.2113	NaN
-11.1874	12.7418	91.5789		58.5975	8.14338	41.6396			-4.0513	73.9848	NaN		38.3655	80.7699	NaN
-7.56616	25.2076	91.7051		58.4935	11.0162	41.6522			-8.54638	75.5869	NaN		39.0253	81.0345	NaN
-8.02997	24.6524	91.6691		59.7789	9.48903	41.7322			-14.1099	70.3793	NaN		41.2086	79.9156	NaN
-12.1568	21.1163	91.8717		59.8397	11.9489	41.6845			-10.9274	74.8001	NaN		23.3643	84.7394	NaN
-10.0762	23.5529	91.5917		60.8051	10.8099	41.6087			-2.75799	71.6191	NaN		21.0836	81.1703	NaN
-8.01073	24.9891	91.5902		57.8645	12.2817	41.6117			2.67777	74.4914	NaN		17.1146	68.2715	NaN
-5.77053	26.2092	91.5896		57.124	10.443	41.7227			13.5659	73.2441	NaN		22.35	75.95	NaN
-3.33426	27.2972	91.5773		58.28	12.3884	41.4638			12.2833	77.3983	NaN		21.1437	76.5106	NaN
0.271214	30.8008	91.5393		56.5289	12.0415	41.4765			12.3107	71.5019	NaN		16.9588	74.5131	NaN
2.33695	31.8508	91.394		55.7251	12.1399	41.3705			19.1167	67.1615	NaN		17.0895	68.7566	NaN
4.12753	27.0487	91.7099		-0.987472	13.8624	38.8693			30.5864	67.0243	NaN		5.18729	69.8659	NaN
2.92887	30.9959	91.6349		-0.731225	13.6226	38.7015			29.8507	67.0579	NaN		7.64534	67.5431	NaN
-1.29471	28.0755	91.899		-2.0022	11.2418	38.6508			27.9089	71.2014	NaN		14.9676	66.7284	NaN
-7.28398	28.7305	91.9075		-2.58391	12.3927	38.4297			28.3002	68.5249	NaN		22.7628	58.2501	NaN
28.1031	43.8819	88.9585		-3.77054	14.1751	38.1688			23.6448	72.3888	NaN		25.5363	57.0529	NaN
31.7989	43.058	88.9408		-3.99069	13.3483	38.1228			27.9555	69.6774	NaN		31.9752	58.2752	NaN
37.3559	40.7716	88.7765		-3.29116	12.7631	38.0364			23.3449	72.102	NaN		19.5781	60.7818	NaN
40.9606	40.5858	88.4645		-3.96198	15.0225	37.8287			25.1171	72.0289	NaN		15.2127	59.2948	NaN
39.5882	36.5108	88.6563		-2.49289	15.9649	37.6645			31.9881	75.9762	NaN		13.456	61.7871	NaN
43.8153	36.6848	88.5128		-2.89293	17.0519	37.5696			27.0951	81.8074	NaN		6.1417	63.6831	NaN
43.5526	35.0419	88.4318		-0.303746	16.1609	37.4704			21.8189	82.0282	NaN		8.71142	59.8088	NaN
44.1789	38.3191	88.1922		-1.26777	14.9405	37.379			25.0787	82.7061	NaN		14.4758	54.4866	NaN
44.468	35.5507	88.1505		-1.71037	16.2283	37.195			24.0059	77.3937	NaN		14.7509	55.9808	NaN
40.9175	35.6569	88.3883		0.52453	14.2924	37.2144			30.8267	81.5302	NaN		14.1783	55.8816	NaN
38.6339	43.6887	87.9672		1.17425	14.3126	37.1464			26.8585	83.8682	NaN		12.5878	53.1012	NaN
32.294	45.5815	88.0606		2.99095	12.6884	37.1447			23.968	85.2685	NaN		10.8757	51.9786	NaN
26.8723	49.6839	87.947		3.30548	13.2524	37.0203			25.2702	73.8054	NaN		10.3007	50.5141	NaN
23.8778	47.3168	87.9993		1.76497	11.4883	37.1119			19.674	78.8684	NaN		2.42152	44.7594	NaN
26.2122	47.1813	87.7313		1.9553	12.8288	36.9235			24.338	73.6874	NaN		-0.86	39.7843	NaN
30.1401	44.6953	87.658		-0.136148	14.501	36.7731			31.4529	73.9283	NaN		-3.13359	34.4975	NaN
35.7828	44.265	87.3307		0.108953	11.6863	37.0417			31.3546	72.2153	NaN		-7.18765	33.6589	NaN
34.315	41.8587	87.4973		0.155614	11.7602	36.9686			30.2845	76.5563	NaN		-12.6093	34.7952	NaN
39.5189	39.4608	87.4297		-0.359112	12.2403	36.8559			25.5334	80.1011	NaN		-20.2566	34.1427	NaN
36.2498	40.1866	87.1432		0.0360323	13.1113	36.8539			39.9655	73.3025	NaN		-24.3666	35.0443	NaN
21.4859	50.8238	83.6065		-0.773271	12.9143	36.881			39.576	72.4109	NaN		-52.6779	44.7029	NaN
25.9294	49.546	83.5822		-1.25572	12.4918	36.9095			47.5933	72.9178	NaN		-54.0582	44.8962	NaN
28.7654	47.059	83.4826		-1.79397	12.7594	36.953			46.7093	71.3133	NaN		-49.077	38.1039	NaN
31.6379	46.8468	83.2997		-3.94414	13.9211	36.8566			47.269	71.4887	NaN		-50.2012	33.2415	NaN
33.2277	45.9109	83.0853		-3.9765	13.9108	36.8332			48.5145	73.874	NaN		-56.0065	41.4109	NaN
32.9807	41.5807	83.169		-4.8733	14.4625	36.7573			56.6854	66.2258	NaN		-49.891	34.0091	NaN
37.1812	39.4362	83.0949		-7.66154	14.4144	36.7983			53.2941	72.034	NaN		-53.0676	34.897	NaN
35.1983	44.3778	82.4292		-13.1555	14.8075	36.8309			43.5961	77.7031	NaN		-49.3526	35.2815	NaN
31.5206	42.9542	82.5888		-17.6058	14.4647	36.9212			54.3808	69.533	NaN		-52.9308	35.1692	NaN
29.6143	48.2986	82.4176		-23.6735	16.4026	36.6694			50.4301	71.3355	NaN		-52.8617	32.1275	NaN
41.5678	32.2879	81.7443		-26.6838	16.5531	36.5175			46.4718	76.4514	NaN		-52.7977	32.4882	NaN
41.5152	36.7257	81.5978		-28.7898	14.4477	36.5987			11.2539	83.2969	NaN		-51.5801	31.9782	NaN
36.3061	42.144	81.581		-31.4659	14.636	36.4991			14.4067	81.3982	NaN		-54.7041	30.7814	NaN
31.8679	44.4274	81.4432		-35.1494	14.5041	36.3953			17.3595	81.6492	NaN		-53.0698	34.3312	NaN
31.4009	45.1222	81.3721		-37.0666	13.7654	36.3886			21.5427	78.6697	NaN		-51.4771	32.1118	NaN
32.9687	42.3354	81.3748		-40.1375	13.6817	36.2993			23.4735	76.2	NaN		-49.6159	37.6755	NaN
32.4503	45.3813	81.077		-40.8195	14.9912	35.9991			21.8978	77.3443	NaN		-51.7599	34.5517	NaN
35.9488	41.3668	81.0465		-41.0231	15.9075	35.8375			28.4677	73.632	NaN		-50.2374	31.3939	NaN
39.6726	36.5094	81.1005		-39.8282	14.9089	35.8789			30.38	67.906	NaN		-54.6814	31.8966	NaN
43.5265	32.8627	80.9354		-37.3712	15.0985	35.8881			29.9772	67.0477	NaN		-56.7454	30.1269	NaN
44.6036	32.9418	80.5888		-37.5447	13.7802	35.6871			18.5441	71.7406	NaN		-55.4064	25.8739	NaN
42.977	35.0576	80.5255		-36.2366	15.4452	35.3562			14.9137	69.9275	NaN		-55.7641	23.2345	NaN
41.6423	37.6085	80.2788		-35.8778	12.8917	35.3081			17.4829	71.3201	NaN		-54.8794	27.7398	NaN
40.5298	37.3591	80.2803		-35.3594	13.4964	35.1762			26.1058	66.2103	NaN		-56.7378	22.819	NaN
41.2643	36.7785	80.1666		-35.3074	11.6695	35.0074			22.2705	61.2711	NaN		-56.9086	26.0865	NaN
41.2234	34.7708	80.0956		-34.6594	9.64994	34.9205			21.4417	60.3277	NaN		-53.9149	27.2114	NaN
42.1079	34.0068	79.9792		-34.1059	10.3376	34.6438			24.5409	54.605	NaN		-57.0548	30.5866	NaN
39.6682	38.075	79.8008		-34.7138	11.3047	34.4354			23.6067	54.1692	NaN		-59.6742	30.5143	NaN
36.2596	41.1437	79.6954		-34.0526	10.0421	34.3905			21.8115	57.2694	NaN		-54.955	32.4489	NaN
34.8938	46.1999	79.5569		-35.9241	9.34415	34.1937			14.8072	56.4955	NaN		-56.0247	31.3389	NaN
32.5965	45.0903	78.0423		-36.9968	10.5732	34.0488			15.6731	57.8181	NaN		-57.8968	31.6631	NaN
32.3169	46.5628	77.752		-37.2027	13.5359	33.7921			18.4609	56.1092	NaN		-57.184	30.7772	NaN
30.7588	46.397	77.7573		-37.3389	12.6608	33.8322			19.645	53.1626	NaN		-57.0444	28.3022	NaN
28.7698	47.1113	77.6656		-38.1472	13.1123	33.6528			22.7083	56.2988	NaN		-55.3833	25.421	NaN
32.1133	43.506	77.6735		-37.1596	13.6515	33.3085			21.5906	59.9414	NaN		-60.2826	24.8342	NaN
33.5812	45.252	77.7323		-37.062	12.2317	33.0815			29.4219	60.3586	NaN		-61.5583	26.3048	NaN
33.4422	45.8728	77.3392		-36.2532	10.3814	33.0048			32.3714	62.8123	NaN		-59.3606	30.9908	NaN
32.197	43.2374	77.0781		-35.0678	14.0796	32.6376			24.7026	69.1561	NaN		-61.5392	30.4927	NaN
33.1685	46.3754	76.8675		-35.8312	16.3573	32.3733			23.4068	73.7684	NaN		-60.7934	30.2557	NaN
30.2154	45.7266	76.7784		-33.9512	13.9504	32.3924			22.9266	74.3384	NaN		-63.8088	31.7155	NaN
32.8028	43.3783	76.6156		-32.6592	14.5374	32.2076			28.7754	70.8404	NaN		-61.48	32.7281	NaN
40.5185	36.9519	76.3147		-33.3037	14.0406	31.9516			25.7069	72.821	NaN		-60.2	33.8862	NaN
49.2703	28.4683	76.114		-31.5529	14.1858	31.7693			24.0156	73.0733	NaN		-58.6501	30.7957	NaN
51.0279	22.309	76.0745		-33.2078	12.4015	31.6022			24.8988	65.4685	NaN		-61.9437	32.9016	NaN
53.9791	18.4306	75.9851		-33.112	11.8689	31.4388			28.7837	64.0607	NaN		-62.0029	33.5157	NaN
50.8098	24.9688	75.5745		-34.7328	11.1508	31.4291			19.0068	67.0111	NaN		-61.33	33.8517	NaN
50.9887	25.1225	75.5232		-31.6472	9.45575	31.2751			28.451	59.6791	NaN		-64.5499	35.2883	NaN
43.9285	30.2153	74.0118		-33.0736	11.7136	30.8699			23.8279	58.1573	NaN		-62.7936	38.4864	NaN
43.2745	35.1891	73.7804		-34.0565	13.494	30.661			32.6916	55.5462	NaN		-68.4948	36.3493	NaN
41.539	36.684	73.7023		-35.0392	11.6887	30.5844			36.7213	49.9441	NaN		-69.1424	37.0073	NaN
16.0781	54.453	61.6694		-36.2275	13.4769	30.3843			39.4403	47.2305	NaN		-63.7347	40.0989	NaN
10.2804	54.7103	61.5018		-34.5212	13.7511	30.0738			31.3105	51.8954	NaN		-67.314	37.2401	NaN
12.8129	56.5431	61.3529		-34.2029	13.9868	29.9084			42.6026	43.669	NaN		-71.0446	39.5333	NaN
9.71647	55.5654	61.3466		-33.7138	15.3044	29.7229			38.9706	45.7156	NaN		-67.7206	40.5345	NaN
8.90532	55.3385	61.029		-34.635	12.8702	29.7354			48.8796	42.8025	NaN		-68.9779	39.0699	NaN
8.13451	53.86	60.922		-33.1937	12.7243	29.4626			44.1614	48.3073	NaN		-67.6908	46.1123	NaN
8.39196	51.8453	60.8569		-33.1715	13.7469	29.19			50.3064	43.574	NaN		-71.5973	50.0251	NaN
12.16	52.688	60.5647		-33.5925	11.6023	29.1385			54.6038	43.7007	NaN		-70.9511	48.3187	NaN
16.5343	54.8663	60.2503		-32.8551	12.1747	28.9612			55.1369	31.6423	NaN		-68.1693	49.8379	NaN
20.3047	50.967	60.1987		-32.8889	9.61912	28.9609			55.1436	31.5661	NaN		-66.9355	51.8175	NaN
25.321	48.8077	60.1422		-31.2227	7.33633	28.998			59.9446	30.2357	NaN		-65.022	55.2957	NaN
27.6039	50.4107	59.9487		-31.5529	7.31308	28.9095			64.1553	23.4293	NaN		-70.6693	51.9363	NaN
28.0709	48.7737	59.8828		-29.5413	5.59577	28.8996			59.2302	29.1731	NaN		-67.8253	55.1087	NaN
27.5696	49.5522	59.7458		-27.9676	7.27361	28.869			60.9438	29.4293	NaN		-66.0157	57.5284	NaN
26.7093	50.4267	59.5823		-30.7019	11.4302	28.4595			57.9505	28.2482	NaN		-57.5333	66.1722	NaN
26.5406	51.1916	59.3773		-31.2432	12.6769	28.4745			56.0389	27.2419	NaN		-68.7224	57.9701	NaN
25.3912	50.7211	59.3177		-33.0565	12.3085	28.644			54.6334	29.3846	NaN		-76.3178	45.8106	NaN
26.0109	50.0328	59.1513		-33.7354	14.551	28.4762			52.3566	28.087	NaN		-71.5016	48.7808	NaN
27.6604	48.7378	59.0906		-32.46	14.512	28.3895			49.1492	18.4397	NaN		-72.4289	45.932	NaN
30.9935	47.6361	58.9821		-32.2306	12.4158	28.5887			50.3945	16.9682	NaN		-71.9134	47.5323	NaN
28.8817	49.0335	58.6745		-33.3919	12.3011	28.4701			44.4951	22.876	NaN		-77.3195	45.7507	NaN
32.4823	46.3782	58.6341		-31.8748	11.5258	28.5087			47.5731	24.7344	NaN		-61.7657	64.7366	NaN
32.9317	46.7265	58.4103		-33.8813	10.8556	28.3394			45.5673	20.5682	NaN		-56.1316	66.1597	NaN
35.2399	44.4608	58.3812		-35.3713	9.56521	28.3351			45.5435	22.959	NaN		-55.7434	66.5431	NaN
85.2044	17.9359	53.4892		-35.5092	11.8676	28.1333			43.9885	28.2794	NaN		-51.8261	68.0011	NaN
84.5917	19.8342	53.4094		-34.6575	10.3734	28.181			30.2744	-68.0203	NaN		-44.1668	71.4376	NaN
83.9269	20.6762	53.4269		-33.7486	10.1816	28.3096			31.4843	-62.6961	NaN		-49.0697	70.1228	NaN
83.4308	24.3469	53.4015		-31.3905	8.84271	28.3384			27.6995	-65.2649	NaN		-41.1755	65.0296	NaN
82.9321	29.6325	53.2812		-31.4486	9.51098	28.2698			34.5194	-60.8858	NaN		-44.2158	67.3364	NaN
78.3146	33.4443	53.3919		-31.4461	10.3007	28.2269			42.9366	-54.6391	NaN		-51.0632	65.0771	NaN
80.498	29.2909	53.3016		-31.9499	11.9561	28.103			37.006	-57.9345	NaN		-49.9883	67.0455	NaN
82.7039	22.1046	53.252		-31.6578	12.6541	28.1203			40.8064	-50.8647	NaN		-47.9428	66.327	NaN
86.8155	14.7269	53.0821		-30.2569	12.343	28.1612			40.6877	-50.7042	NaN		-43.998	64.7249	NaN
84.9317	16.0525	53.3125		-28.2005	13.3209	28.1716			43.9332	-48.4462	NaN		-49.9348	62.4009	NaN
86.1691	23.4228	53.144		-28.6691	13.8921	28.152			43.4459	-49.8927	NaN		-48.2248	63.4634	NaN
85.5997	24.9802	52.8107		-28.441	13.2055	28.2264			44.1851	-47.7246	NaN		-52.7135	60.2602	NaN
82.4583	28.6753	52.9126		-27.9667	12.2578	28.3159			32.3155	-55.3332	NaN		-44.9575	57.7898	NaN
80.1025	37.8203	52.6943		-28.2809	15.6588	28.0893			38.7156	-49.9392	NaN		-42.6708	65.7589	NaN
77.3546	40.729	52.7591		-26.142	13.0698	28.3202			37.5338	-49.7985	NaN		-52.6537	64.808	NaN
73.1739	46.1077	52.7105		-27.0298	14.4719	28.2012			38.6593	-50.236	NaN		-47.6454	64.6004	NaN
70.0513	47.098	52.8624		-25.3475	10.371	28.5555			88.9324	2.38209	26.7726		-44.6916	64.5171	NaN
73.8332	47.8172	52.6948		-29.7443	12.8624	28.3588			84.1134	5.59363	26.8173		-44.1866	66.804	NaN
72.5503	48.1658	52.7642		-29.7576	12.3327	28.3884			84.7873	17.2912	25.5194		-42.1158	67.2017	NaN
74.1334	48.4034	52.6389		-33.4008	11.8498	28.2931			75.6158	23.7982	25.4272		-39.651	66.1303	NaN
77.3142	41.7981	52.7595		-33.2973	12.4714	28.2526			67.4904	30.1176	25.3797		-38.2216	62.4522	NaN
83.1488	32.3606	52.6581		-32.4756	11.8509	28.3575			64.0523	34.7717	25.1109		-37.4618	64.6351	NaN
86.465	22.5006	52.5632		-35.5084	14.3904	28.2987			61.5777	34.493	25.1302		-29.4325	67.1311	NaN
77.2306	42.958	52.0451		-33.0304	11.9034	28.5277			60.4192	37.4522	24.8026		-25.8429	64.8742	NaN
76.8994	42.2364	52.1381		-34.5522	11.9983	28.56			59.3262	36.9284	24.8375		-36.2256	62.8528	NaN
72.8343	48.7897	51.8619		-35.8738	14.5951	28.5135			59.9165	41.0293	24.6576		-33.8572	68.285	NaN
89.029	-8.77305	12.1618		-37.3349	17.996	28.3546			62.8612	39.8188	24.6321		-34.5795	66.3828	NaN
87.5246	-1.32766	12.0224		-37.5817	16.2588	28.4074			62.569	43.8687	24.3541		-36.5795	66.4361	NaN
85.4708	-2.90001	12.1095		-38.46	14.989	28.3661			64.3205	40.8995	24.2721		-40.819	62.3114	NaN
84.984	2.47894	12.0611		-39.3348	12.534	28.438			66.5903	39.6159	24.1531		-40.2087	63.181	NaN
84.5429	12.231	11.7778		-40.6979	11.6588	28.4979			67.9995	36.7404	24.0088		-38.5279	64.0133	NaN
86.1061	12.1246	11.6277		-46.4359	8.91202	28.5379			70.2614	34.5258	23.7965		-33.6398	66.6019	NaN
85.903	9.67182	11.6682		-50.9281	7.45706	28.6044			70.568	31.9797	23.6209		-36.2802	63.899	NaN
86.1702	10.5266	11.5712		-58.5316	9.29076	28.4624			70.5194	31.5558	23.5233		-41.2015	61.2908	NaN
88.8461	7.93697	11.4444		-64.8942	6.42737	28.5444			71.628	26.8094	23.4717		-34.1441	67.1992	NaN
88.2658	6.64557	11.3638		-70.9513	5.74138	28.5268			70.443	26.4934	23.3771		-26.1317	69.1376	NaN
88.0166	4.867	11.4221		-78.377	4.26925	28.6866			70.6422	30.5066	23.003		-30.5782	65.5022	NaN
89.1672	6.25626	11.1532		-81.8388	3.91358	28.6026			70.2294	31.8922	22.7547		-30.081	62.5892	NaN
88.0077	15.6219	10.4396		-85.9382	2.45608	28.6269			68.97	29.1006	22.7429		-33.9567	68.0696	NaN
86.1195	15.6434	10.4633		-88.8458	0.321809	28.7034			68.7959	29.6813	22.4528		-30.6362	68.1386	NaN
85.7206	16.7934	10.1907		86.3853	-6.76432	31.1772			69.5542	29.9548	22.1513		-27.0031	73.9747	NaN
78.3006	21.6637	10.2426		83.6709	-6.72813	31.1077			70.0784	29.5741	21.9519		-28.1446	70.6793	NaN
74.367	24.0235	10.2377		81.2279	-2.47743	30.8242			70.4472	31.3648	21.6277		-25.2956	78.0645	NaN
69.5169	28.2999	10.1842		80.0914	-0.297639	30.7322			72.8735	32.345	21.4267		-17.5669	76.2976	NaN
68.4399	25.1559	10.2261		78.0293	2.91784	30.6142			73.0368	30.5067	21.3401		-18.5165	79.9808	NaN
68.024	28.9841	10.018		76.3899	4.77164	30.4598			73.467	30.4586	20.9627		-27.352	75.5615	NaN
69.385	26.2248	10.1007		73.7165	7.68624	30.2342			74.2003	26.6099	20.8621		-23.121	77.0799	NaN
70.9688	25.3411	10.0809		73.0348	7.72019	30.1936			73.5923	22.2339	20.605		-29.1332	83.7861	NaN
71.8073	26.4087	10.0827		70.6974	8.03647	30.1422			73.2384	20.8768	20.5776		-27.451	78.2607	NaN
73.0979	32.6224	9.88002		67.5064	6.6424	30.0703			72.0895	24.6671	20.345		-24.2654	78.0687	NaN
73.2451	36.4871	9.77812		67.175	5.38798	30.0208			69.5307	29.4458	20.124		-27.2396	78.6429	NaN
72.0994	37.3221	9.69632		64.5317	6.0258	29.8451			69.2926	30.7186	19.9463		-32.3663	74.6712	NaN
71.9949	31.4136	9.8669		63.4808	5.61284	29.8092			68.6064	31.3842	19.8787		-32.8784	74.1764	NaN
72.6208	26.9101	9.90456		62.2333	3.08362	29.5679			67.6713	33.7498	19.6935		-29.2097	72.0816	NaN
71.4785	25.7756	9.95905		62.178	-3.85774	29.6198			69.0646	32.5264	19.6589		-33.6058	71.0815	NaN
71.0795	31.3735	9.81325		61.5216	-4.77529	29.2774			68.7	33.7065	19.4789		-36.1393	64.8895	NaN
69.6313	27.4005	10.0331		61.3262	-5.77136	29.1344			69.1442	35.3407	19.1766		-40.3568	64.7354	NaN
68.5677	27.4458	10.1758		59.8846	-4.70065	28.9674			68.1014	34.5701	19.0635		-42.5361	68.4526	NaN
69.2873	27.826	10.1901		59.3913	-6.38487	28.9126			69.5012	33.303	18.971		-38.9409	67.7012	NaN
69.0513	26.6703	10.2682		59.0865	-4.95729	28.6943			68.792	31.3374	19.0271		-40.2972	66.966	NaN
68.4855	27.1213	10.3165		55.0865	-1.69904	28.5708			68.7337	32.2025	18.8156		-38.7605	72.603	NaN
68.1135	27.0223	10.3693		52.7004	0.783805	28.4815			69.0234	28.408	18.7264		-37.4387	68.0932	NaN
66.6381	25.3871	10.4843		47.5841	4.11585	28.3604			67.9464	30.3404	18.5453		-34.0111	67.5701	NaN
65.1525	25.2703	10.4921		43.4504	3.1707	28.2722			67.6062	28.423	18.5316		-31.1027	68.0111	NaN
63.323	28.1131	10.5988		42.1228	3.27576	28.0615			65.5867	29.2027	18.4577		-34.4697	66.7597	NaN
61.9125	25.5278	10.8744		38.2814	3.63266	27.8765			65.306	27.04	18.5077		-30.8499	64.4113	NaN
63.2624	27.6797	10.8756		36.2756	2.54741	27.8552			64.7895	28.1107	18.4089		-33.7731	64.3103	NaN
63.6367	25.5519	10.8103		35.8885	3.36475	27.612			65.8506	28.1253	18.4052		-33.3338	68.4983	NaN
62.1592	27.267	10.8677		35.4845	2.95596	27.543			66.0433	30.0157	18.2399		-32.1654	72.7147	NaN
62.4743	24.0894	11.0212		36.0617	5.28136	27.2484			68.7891	27.5993	18.2396		-37.503	70.1979	NaN
62.0356	24.9919	11.1409		35.6301	3.32117	27.235			71.687	26.3148	18.2274		-32.4902	75.9019	NaN
60.3557	24.8379	11.172		34.4619	0.773986	27.3183			74.7791	30.7316	17.9053		-37.1369	71.9044	NaN
59.9638	26.6004	11.3484		35.6483	1.36347	27.0785			74.7355	29.4116	18.06		-36.7452	62.6492	NaN
59.96	28.0324	11.4		36.7351	2.28541	26.9472			75.3056	30.3775	18.1389		-36.7625	63.2804	NaN
59.6107	26.7569	11.6848		36.634	5.65406	26.7103			75.1056	32.7226	18.0653		-35.1616	61.1362	NaN
59.2888	25.5777	11.6254		35.9601	4.559	26.8274			74.9813	34.0849	17.9895		-39.0644	62.877	NaN
59.0026	24.999	11.7873		35.3944	3.78804	26.8645			73.0914	33.6829	18.0959		-37.3166	58.1022	NaN
58.0834	27.3629	11.7426		35.5615	5.23056	26.7266			74.0601	34.4108	17.9282		-38.9382	52.1053	NaN
57.6372	25.6953	12.079		34.2701	4.34045	26.7642			72.3527	34.7158	17.9164		-38.1879	45.3235	NaN
58.1588	25.4446	12.1295		8.30568	0.639739	25.7093			73.7103	34.3192	18.0302		-42.2927	48.3558	NaN
57.2009	21.8309	12.3059		9.27155	-0.247831	25.7			74.5242	36.5886	17.7544		-44.6314	46.7012	NaN
55.5504	20.5874	12.4391		9.54441	-0.965763	25.6782			74.3312	41.659	17.3582		-42.4955	37.9408	NaN
52.4794	19.1152	12.6035		10.9936	-0.353588	25.5474			73.2891	39.6818	17.3912		-48.6473	41.2216	NaN
50.3952	13.3793	12.8266		10.8871	1.31894	25.4851			72.3337	35.8303	17.5709		-42.8952	42.1998	NaN
48.8625	10.8875	12.8842		11.0186	2.12099	25.4783			73.75	36.6972	17.1613		-47.2587	44.001	NaN
50.2185	14.9356	12.9784		9.81618	4.23548	25.3436			71.5899	33.5467	17.233		-45.528	50.7688	NaN
52.4209	19.8012	13.1621		9.69157	3.79735	25.3781			69.6975	34.3268	17.06		-45.4551	54.4783	NaN
51.956	29.4047	13.1893		9.30981	6.57662	25.1951			67.4267	35.9942	16.969		-46.0497	50.188	NaN
51.9052	29.2109	13.5058		10.5357	3.89183	25.2659			63.2661	36.6487	16.8554		-46.4209	49.8952	NaN
49.7457	31.2023	13.4112		10.7379	3.11255	25.222			57.0322	33.6172	16.8838		-46.7176	56.9082	NaN
45.2716	36.9934	13.3474		11.445	3.39945	25.2308			46.1672	43.0437	16.4467		-49.0421	51.979	NaN
44.5351	34.4167	13.6591		11.3723	3.52667	25.2253			38.8245	38.3755	16.6967		-52.2063	57.7246	NaN
40.3305	37.7271	13.5751		11.061	4.56608	25.1975			41.5645	40.2853	16.4933		-53.7503	57.2534	NaN
35.2006	39.602	13.3665		8.14813	4.37535	25.1972			45.967	40.511	16.533		-47.1797	67.234	NaN
29.9672	40.5986	13.3434		5.65766	8.04747	24.9665			48.3569	43.9139	16.3112		-46.7742	65.1586	NaN
31.3505	39.8151	13.3983		2.68394	7.44997	25.0842			52.085	45.691	16.0188		-51.4597	62.991	NaN
29.4031	39.7179	13.4627		-0.610408	9.05401	24.9934			54.2624	42.7113	15.9439		-42.0574	71.614	NaN
29.1862	38.8829	13.4527		-4.50506	11.9175	24.8548			55.5574	42.2642	15.7055		-52.8572	67.4231	NaN
27.5109	42.824	13.2603		-9.01339	8.55832	24.781			60.716	40.4011	15.495		-52.781	60.2583	NaN
29.5631	42.1568	13.3696		-10.6363	10.5937	24.717			62.1347	37.6113	15.2334		-51.4704	63.0624	NaN
26.6125	43.8222	13.2165		-12.0653	12.0338	24.502			60.6331	40.3126	14.9484		-52.8472	62.1377	NaN
28.5279	41.727	13.2999		-14.3007	12.2347	24.152			61.5014	34.7687	14.9973		-51.7564	60.6087	NaN
28.2122	43.2565	13.1531		-11.775	8.50515	24.4175			60.4028	35.6148	14.7183		-51.546	60.2028	NaN
27.7154	42.0018	13.1814		-11.6687	9.59556	24.1706			60.2933	33.7727	14.756		-53.3013	58.0916	NaN
23.7623	40.4473	13.1332		-12.2385	9.68481	24.1534			59.7117	31.1421	14.7357		-55.9945	55.6958	NaN
24.797	41.6792	13.0515		-11.3931	8.97609	24.1798			57.3808	34.1944	14.5314		-55.8485	56.5922	NaN
26.5949	42.3099	13.0349		-11.3013	7.88949	24.1928			56.8239	36.5756	14.3866		-54.8824	52.2104	NaN
25.752	45.013	12.8136		-11.4241	5.20647	24.202			55.9524	39.0467	14.2743		-57.8078	51.1428	NaN
26.4016	45.3471	12.7688		-12.6735	5.7507	23.9391			55.9628	41.5457	14.2034		-58.0819	54.9113	NaN
27.3005	46.0656	12.7236		-12.8966	3.50056	23.9456			57.3704	43.8514	13.9603		-54.6969	50.7321	NaN
28.4019	44.142	12.6146		-15.001	4.07048	23.8901			56.3784	45.8583	13.716		-56.3993	54.0991	NaN
29.9103	46.006	12.4918		-15.3091	7.19159	23.7891			56.0915	46.8941	13.7303		-56.3215	50.6998	NaN
29.0868	49.042	12.1761		-16.2833	10.0563	23.6522			58.6671	47.6693	13.5627		-54.9146	48.9623	NaN
30.9282	47.6129	12.1548		-18.8983	12.5558	23.5658			55.705	48.2852	13.4563		-52.8777	45.3574	NaN
30.8807	49.791	11.9647		-18.4234	11.9849	23.5139			53.6647	52.9704	13.0582		-56.3364	41.4791	NaN
30.4631	48.3312	11.9235		-18.6656	10.589	23.4811			50.9581	51.9638	13.0592		-58.2276	46.9825	NaN
33.7416	45.9664	11.9195		-18.8013	13.3544	23.2447			52.5167	52.0494	12.7493		-58.7761	46.3489	NaN
31.179	48.3232	11.4504		-17.6188	8.99815	23.3951			56.8971	50.3967	12.5422		-59.3094	44.6988	NaN
33.5863	45.4009	11.5028		-17.2146	8.65862	23.3576			59.7175	47.7938	12.3987		-61.0266	45.0513	NaN
30.9289	46.1035	11.3129		-18.8819	9.23175	23.2172			60.8659	46.0948	12.1457		-61.1792	46.2651	NaN
32.3178	46.9569	11.2062		-17.6491	8.95829	23.1169			62.352	41.2897	12.0063		-63.0709	51.1872	NaN
31.7095	46.8944	11.0438		-17.7735	8.62617	23.0313			62.5226	37.2949	11.844		-58.1907	53.3161	NaN
32.5308	46.0525	10.7385		-17.6048	10.4608	22.7728			62.6202	35.4509	11.6102		-61.7233	54.1069	NaN
31.1347	48.5808	10.5649		-16.8507	8.24595	22.827			61.3513	38.3979	11.3688		-59.5446	58.7746	NaN
35.4733	46.3286	10.6224		-17.3093	7.846	22.8096			61.1925	36.2245	11.4577		-63.8792	57.5029	NaN
32.6334	48.3895	10.3902		-14.2631	9.03612	22.6397			60.7278	39.4681	11.2432		-64.4832	57.9814	NaN
35.4218	45.454	10.2271		-15.9129	8.5428	22.5263			57.1494	45.4156	10.9195		-64.3093	56.5376	NaN
35.1002	49.5346	9.82365		-14.262	7.60776	22.5256			54.3778	49.0352	10.6596		-64.5948	51.1577	NaN
36.2943	45.6599	10.0042		-15.9852	7.25569	22.4364			55.8005	50.9285	10.5672		-62.7504	52.5701	NaN
38.2342	48.5681	9.56564		-14.26	7.57975	22.3709			51.4473	52.0556	10.5018		-62.1058	48.5753	NaN
35.5636	49.016	9.41438		-15.1631	9.93676	22.0773			52.7825	48.8051	10.5831		-61.8757	47.9916	NaN
38.8158	48.5165	9.22799		-14.6366	7.18029	22.1648			50.9441	49.0084	10.4856		-63.4203	44.3953	NaN
42.3209	47.3628	8.93394		-13.9682	9.39759	21.9714			50.2881	49.9829	10.3244		-62.5728	44.2402	NaN
48.3293	47.5671	8.58855		-11.9633	9.23305	21.9163			53.7623	50.8747	10.1085		-61.8423	47.5221	NaN
46.2788	52.1545	8.14777		-12.0795	8.24692	21.8099			56.8039	47.5992	10.2345		-62.9236	46.9119	NaN
50.1132	46.6317	8.19619		-13.9758	9.2663	21.5754			59.5774	50.7026	9.98155		-58.9421	49.8739	NaN
50.9877	48.5429	7.79718		-12.4751	6.20364	21.5503			63.4749	48.4683	9.80876		-59.8092	47.8685	NaN
51.4076	46.21	7.54543		-13.2049	6.83938	21.3876			66.7965	45.2483	9.60262		-62.4266	47.7122	NaN
51.224	44.2654	7.41491		-12.7618	6.21838	21.3121			69.0522	43.1911	9.37611		-60.2874	46.825	NaN
52.0501	45.221	7.029		-11.6913	6.82238	21.1581			68.7566	44.0949	9.08441		-59.9785	45.2004	NaN
52.6389	44.3926	6.82418		-12.1472	8.82339	20.9829			70.0067	38.6814	9.17513		-58.053	45.1358	NaN
51.1808	42.5814	6.83751		-12.6316	5.43687	21.1053			70.8645	39.8462	8.91277		-57.1188	48.3333	NaN
50.3776	42.5754	6.58267		-11.7499	5.78409	20.9207			67.8604	43.397	8.67533		-58.4757	53.8979	NaN
51.0661	40.2537	6.59905		-12.405	4.43123	20.896			65.0949	44.0428	8.57439		-58.3177	57.6272	NaN
52.3045	39.0347	6.43073		-12.0916	4.41006	20.7829			60.8901	44.5547	8.46589		-57.3658	58.9797	NaN
49.7433	38.1419	6.53534		-11.5143	3.76021	20.7291			57.5874	47.9586	8.3976		-60.323	56.5251	NaN
53.2544	38.8385	6.34374		-11.9577	4.41138	20.6041			59.8385	48.5624	8.07212		-58.7736	59.0947	NaN
50.575	38.4176	6.53402		-12.2117	3.76613	20.6032			63.5686	47.7311	7.90362		-60.5342	61.0727	NaN
52.3715	38.0292	6.45822		-11.2387	6.09745	20.3887			64.1324	52.63	7.56237		-60.6613	64.8094	NaN
50.146	44.6287	6.01545		-9.38187	6.98042	20.3291			67.4426	50.0057	7.36353		-52.1732	69.6568	NaN
48.0105	48.2382	NaN		-9.34686	7.54021	20.2602			68.9974	46.5789	7.08689		-53.9208	68.4706	NaN
48.7664	47.2002	NaN		-10.4188	7.81761	20.1132			64.5432	46.4737	7.04687		-57.0566	68.3463	NaN
49.4428	41.8326	NaN		-7.86655	5.60221	20.1406			64.1482	43.413	6.78123		-46.6007	74.3966	NaN
53.4129	43.8799	NaN		-8.1632	5.20848	20.0056			57.0307	49.695	6.34162		-50.514	68.2631	NaN
49.1029	49.5615	NaN		-6.52268	4.64129	19.9425			55.586	49.7423	6.3298		-52.2832	71.8424	NaN
48.8663	48.9947	NaN		-8.88184	5.26457	19.7774			51.1027	48.927	6.18677		-50.7399	67.2064	NaN
55.6666	44.5446	6.19741		-8.11112	5.24424	19.7276			46.1628	52.173	NaN		-50.2853	69.5966	NaN
55.4081	44.2957	NaN		-8.55011	5.02614	19.6296			43.853	53.8845	NaN		-50.9658	74.054	NaN
53.3753	45.1027	NaN		-5.29929	7.56815	19.4046			37.9591	59.2041	NaN		-50.4606	69.1653	NaN
57.7664	44.9141	NaN		-5.41596	6.57657	19.4116			36.5965	60.1859	NaN		-49.7637	68.0732	NaN
54.1346	43.6829	NaN		-2.67702	7.34286	19.2104			37.3102	63.6843	NaN		-31.2486	83.7275	NaN
53.9719	52.3639	NaN		-4.04556	7.31842	19.1673			36.5626	66.2733	NaN		-33.5243	79.0208	NaN
54.6521	46.6477	NaN		-2.89361	7.85231	18.9597			36.4107	69.3812	NaN		-38.1709	77.1886	NaN
55.6183	50.9239	NaN		-3.80827	7.09714	18.9516			36.072	69.6663	NaN		-39.5904	78.9918	NaN
51.3636	53.8297	NaN		-2.78288	8.29493	18.7181			40.7884	69.0374	NaN		-42.252	74.3724	NaN
52.1014	49.5406	NaN		-1.31778	5.7344	18.7826			35.2883	70.9197	NaN		-41.4844	77.4142	NaN
44.1799	56.6113	NaN		-1.29194	8.43176	18.4792			22.5456	25.1752	16.8389		-44.2088	73.1776	NaN
51.6579	58.9332	NaN		-0.00412351	5.06933	18.6372			18.0772	26.6374	16.6857		-44.9343	77.313	NaN
44.9035	54.274	NaN		-0.304702	9.89366	18.278			18.4966	25.8555	16.7708		-48.4156	64.2562	NaN
47.1237	66.6535	NaN		-1.08609	5.4954	18.5341			18.3459	28.0351	16.7143		-44.6552	72.4244	NaN
36.1983	62.3438	NaN		-0.772327	5.47566	18.5807			18.4702	30.532	16.523		-41.0253	70.6929	NaN
30.0416	69.793	NaN		0.631278	9.43196	18.2553			20.4898	32.5137	16.4935		-39.3826	72.1805	NaN
32.5269	67.3313	NaN		0.541179	10.579	18.1542			19.0425	34.3974	16.3754		-38.3262	73.6754	NaN
32.5477	72.7199	NaN		1.08012	7.53534	18.3508			20.2985	31.9825	16.4856		-42.3055	71.5948	NaN
24.9431	73.6898	NaN		0.926982	9.47599	18.2352			20.0456	34.062	16.2539		-42.987	74.8943	NaN
20.9461	76.812	NaN		3.23723	8.47606	18.2569			21.147	34.2731	16.1974		-43.567	74.9355	NaN
13.097	79.8198	NaN		3.74656	9.75933	18.1164			22.5796	34.7242	16.1069		-45.0343	75.4277	NaN
11.0841	75.8861	NaN		1.54014	10.0036	18.0243			21.5482	35.7617	15.995		-46.2948	70.4305	NaN
17.6915	72.4749	NaN		3.61351	10.537	17.958			21.3915	36.0072	15.9417		-47.7554	70.907	NaN
10.7814	72.6544	NaN		4.93868	13.3042	17.6633			21.5173	37.3563	15.6142		-45.0449	65.3025	NaN
10.7986	64.3842	NaN		5.09664	9.54458	17.6778			23.8823	36.1878	15.6885		-45.166	67.6738	NaN
21.5041	67.6449	NaN		6.00351	9.22119	17.542			21.7575	36.8435	15.4974		-40.7154	72.5942	NaN
13.7661	60.1645	NaN		5.84737	9.65882	17.3985			23.6904	35.9288	15.4438		-45.8776	70.356	NaN
1.38807	58.6848	NaN		6.23786	9.10577	17.3475			24.2253	35.1544	15.4082		-40.6798	74.6638	NaN
-8.43899	77.1076	NaN		6.56709	5.77741	17.5041			25.8127	34.2631	15.4399		-42.0187	75.9124	NaN
-10.6147	85.7322	NaN		6.36383	9.53127	17.2191			26.5412	34.5337	15.2947		-41.5198	76.8528	NaN
-17.9169	85.604	NaN		6.11053	9.03033	17.1205			27.2554	33.7072	15.1638		-36.8418	77.2184	NaN
-15.9302	81.237	NaN		7.0901	7.8155	17.1898			28.0988	34.8563	15.0108		-36.3019	81.9778	NaN
0.0183816	84.8731	NaN		7.33122	8.55723	16.9276			29.6682	32.9993	15.092		-38.2241	79.3513	NaN
-5.15144	86.0633	NaN		7.05007	9.52941	16.727			29.107	33.4459	14.9949		-29.3297	84.9778	NaN
3.78631	78.6744	NaN		7.53682	8.6112	16.7023			29.8147	36.542	14.6662		-30.5062	84.3185	NaN
9.58171	85.1166	NaN		6.51191	8.69789	16.5329			32.2539	34.6226	14.7494		-34.1528	81.9686	NaN
17.098	88.2097	NaN		5.91741	7.75825	16.5512			29.0698	34.1004	14.5731		-32.8762	81.8883	NaN
11.5068	89.0974	NaN		5.08192	8.38694	16.3258			28.7107	35.6369	14.3943		-26.7859	84.4047	NaN
14.9423	83.6112	NaN		5.1173	8.5755	16.2365			30.5646	36.8306	14.2393		-24.8993	81.6141	NaN
9.90709	84.6263	NaN		0.312245	10.7846	16.0955			29.8739	37.4447	14.1584		-27.89	82.8839	NaN
42.3021	54.8809	NaN		-3.06283	12.4383	15.9631			31.4069	37.7749	14.0645		-42.4137	77.2183	NaN
34.7424	31.526	NaN		-9.8886	13.8149	15.889			33.1743	37.482	14.0256		-36.6925	80.8605	NaN
39.4911	16.1986	NaN		-14.4887	11.4809	15.9118			33.9879	36.545	13.9797		-37.1004	80.7174	NaN
38.6501	12.9529	NaN		-16.5852	11.3973	15.6803			35.0808	38.5064	13.6656		-37.5023	80.3718	NaN
35.6997	10.5122	NaN		-22.3518	11.0621	15.4665			33.3734	35.7651	13.6957		-38.1105	80.6399	NaN
33.2816	5.182	NaN		-23.7249	9.6341	15.3048			33.2686	38.133	13.4003		-35.2081	82.0174	NaN
33.5868	11.0133	NaN		-25.7349	8.85119	15.2095			34.138	35.5682	13.4061		-30.4715	81.1904	NaN
34.6699	4.24351	NaN		-26.3299	9.08634	14.9591			34.2731	38.6788	13.1207		-30.8903	79.7914	NaN
35.2777	4.34713	NaN		-30.2068	10.8167	14.7367			35.615	36.7258	13.1236		-23.4773	86.2485	NaN
34.8533	4.51199	6.01542		-32.4821	10.0038	14.6583			34.5163	37.9208	12.8518		-25.239	83.0002	NaN
33.3811	3.46059	6.42845		-34.2982	13.4134	14.2246			36.9109	36.1218	12.8099		-28.8519	85.0099	NaN
31.0954	3.37048	6.68776		-34.7125	12.2936	14.1263			34.0297	35.5289	12.6138		-35.411	81.3275	NaN
33.2088	1.78114	7.0847		-34.4589	9.7422	14.0571			35.5032	36.7399	12.3713		-33.6593	76.8006	NaN
33.345	5.37032	7.43724		-35.2543	10.0845	13.8048			36.5738	35.2169	12.3057		-33.4305	78.8824	NaN
29.1647	6.19377	7.56053		-35.9652	12.8293	13.3998			40.7463	32.6901	12.1855		-32.672	72.6613	NaN
30.6659	2.17867	8.25288		-34.4811	11.9641	13.2063			41.1845	31.9684	12.0863		-32.7677	74.253	NaN
29.348	3.69868	8.53587		-34.2333	12.393	12.9944			70.1151	43.3587	11.2198		-32.8501	77.811	NaN
27.3848	6.2163	8.70147		-34.5987	12.9925	12.668			45.9463	31.3224	11.6923		-26.8259	82.2401	NaN
28.662	2.74093	9.17745		-33.3628	12.0361	12.6225			46.9582	31.1354	11.5973		-27.2602	83.96	NaN
28.5967	2.74003	9.52359		-35.1233	12.0215	12.3603			47.8911	32.1243	11.3446		-19.6371	85.2785	NaN
28.1726	9.67038	9.40526		-35.9874	11.3147	12.1175			48.8434	32.8883	11.1533		-20.9875	84.2496	NaN
28.0376	7.11798	9.94403		-34.7081	10.5361	11.9907			49.3207	30.5146	11.071		-17.8918	82.0557	NaN
26.7633	10.4593	10.1349		-35.3202	9.90064	11.8426			50.0489	32.0792	10.7894		-15.4375	84.8172	NaN
28.76	7.18677	10.5844		-33.5948	11.3001	11.6977			49.8243	30.1594	10.6672		-9.13704	86.5591	NaN
28.5257	7.44215	10.8453		-34.6076	12.9372	11.4008			48.9841	31.8934	10.454		-14.6814	85.709	NaN
27.2779	10.1768	10.8457		-33.8111	13.1342	11.2261			51.4154	30.356	10.447		-14.088	84.8331	NaN
26.5172	9.52195	11.2367		-35.8884	13.9017	11.1263			50.677	31.0044	10.3137		-25.7773	86.1521	NaN
27.3566	10.1814	11.2164		-34.8364	13.6106	10.9327			49.8077	32.4445	10.1629		-25.3912	86.3124	NaN
27.753	8.7207	11.6637		-34.4593	13.9176	10.8007			49.7553	36.831	9.78144		-22.7652	84.4942	NaN
29.4309	8.74979	12.0278		-36.8272	14.3949	10.6789			48.4178	37.5729	9.7247		-24.0554	85.1429	NaN
28.6733	14.7666	12.1781		-33.9761	16.5569	10.4884			50.9307	37.6851	9.55572		-23.1703	82.1129	NaN
28.425	19.0306	12.5556		-34.1411	15.6339	10.2611			50.4416	38.1033	9.41601		-21.1968	87.3596	NaN
32.3037	14.4157	13.0229		-34.2181	14.7395	10.1449			51.7594	38.2367	9.17829		-27.2999	79.7295	NaN
30.7263	18	12.886		-34.2569	14.6251	9.84741			53.263	35.9826	9.13787		-26.3026	85.0765	NaN
33.6061	19.8963	13.1831		-34.3727	13.5148	9.62625			55.0404	35.9503	8.90928		-20.8915	85.598	NaN
34.8165	20.7006	13.4139		-33.8083	10.5972	9.60657			54.7807	33.8294	8.7748		-25.8433	85.1145	NaN
34.0266	23.509	13.7791		-35.2439	10.6703	9.56919			55.4154	36.4742	8.49513		-25.1083	84.6723	NaN
37.144	25.6677	13.9632		-35.4517	12.6438	9.43375			55.6762	35.622	8.263		-21.0989	84.9467	NaN
36.4158	29.8307	14.0604		-36.1857	16.681	9.14719			56.5394	35.2642	8.14751		-15.6736	85.0814	NaN
34.6529	34.2653	13.8371		-37.6025	18.6518	8.93045			52.7193	37.952	7.81621		-12.5101	85.0382	NaN
35.9237	35.7493	14.1485		-33.8304	20.0161	8.71745			52.2322	39.4129	7.49392		-15.6458	84.4657	NaN
40.0209	35.2292	14.7421		-32.802	19.2032	8.63825			51.4136	41.2812	7.24329		-10.004	83.2757	NaN
40.1319	36.811	14.9254		-33.0191	19.9424	8.40225			49.3942	43.6901	6.92277		-17.2415	80.7516	NaN
41.6989	34.8943	14.7554		-30.4234	19.577	8.21817			54.2428	40.4054	6.92546		-15.4782	81.5804	NaN
43.5975	34.7437	14.4814		-33.1755	21.9101	7.88414			54.9302	41.386	6.66063		-9.75423	84.2026	NaN
45.1123	29.8	14.8166		-32.2569	21.2551	7.67123			57.3704	42.785	6.4298		-12.2191	77.838	NaN
47.7706	24.7284	15.1595		-31.0971	18.6402	7.59725			57.791	43.5562	6.16207		-11.8457	82.8575	NaN
48.374	25.1812	15.2318		-31.9371	19.2069	7.38402			54.651	47.6536	NaN		-14.5119	80.1099	NaN
47.4378	25.9906	15.1961		-32.1805	16.4866	7.27079			53.2788	53.5829	NaN		-9.89334	82.0159	NaN
49.7171	27.2922	15.6746		-35.2794	18.1595	6.96656			51.4956	54.1645	NaN		-19.1625	79.3642	NaN
51.6647	25.1382	15.9022		-34.4165	19.6616	6.81071			49.355	56.8149	NaN		-12.6759	78.836	NaN
52.6158	29.8485	16.0114		-37.1237	21.6329	6.61675			49.1963	59.0429	NaN		-13.3955	79.2377	NaN
51.5908	31.4793	15.8465		-38.4197	23.4374	6.37924			49.2881	58.8373	NaN		-11.4984	80.5894	NaN
54.3264	27.5066	16.2605		-40.6802	23.9309	6.17033			44.5837	60.0492	NaN		-10.8555	78.2235	NaN
56.8133	27.1726	16.536		-42.9437	25.7206	NaN			49.0182	56.5835	NaN		-7.30103	78.4486	NaN
56.1802	30.8754	16.5821		-44.7646	28.1743	NaN			32.4949	25.5876	14.7432		-12.8594	79.0818	NaN
56.6023	32.6151	16.5865		-46.4989	31.1436	NaN			30.9526	25.8275	14.8526		-14.5008	76.0834	NaN
58.0921	33.4496	16.342		-42.318	36.2405	NaN			31.0018	27.7648	14.724		-13.6574	78.8962	NaN
56.0697	39.6512	15.9935		-42.8826	35.471	NaN			31.838	29.0928	14.6604		-14.3282	80.5628	NaN
58.4311	38.6346	16.1104		-41.294	38.8789	NaN			29.7702	22.8179	15.0782		-16.0963	74.2405	NaN
61.7524	36.7647	16.2194		-44.6807	39.9045	NaN			31.0957	23.7432	15.0506		-12.8045	76.1441	NaN
62.3251	35.3675	16.1547		-38.167	41.977	NaN			32.007	22.1358	15.0549		-10.8632	79.047	NaN
63.7721	29.8984	16.2569		-44.9769	40.7226	NaN			34.844	26.3897	14.8521		-10.1292	80.1403	NaN
61.4585	29.4551	15.9725		-42.038	43.389	NaN			34.8952	25.5878	14.7957		-8.68268	80.9853	NaN
62.1913	30.1262	15.9277		-41.351	40.2849	NaN			36.7225	22.318	14.8775		-12.7943	80.6253	NaN
62.9097	28.8527	15.9866		-43.1179	45.346	NaN			35.9367	21.411	15.0807		-13.9671	80.5721	NaN
63.8286	28.5596	15.8481		-41.3276	47.4057	NaN			35.6229	24.8483	14.8104		-15.1543	78.9891	NaN
59.2196	31.9675	14.9941		-39.8631	51.8926	NaN			39.996	21.2446	14.9782		-22.1502	80.4697	NaN
62.0497	22.8243	15.4688		-39.6891	54.6903	NaN			41.0437	23.2974	14.9583		-13.9236	88.1191	NaN
58.5532	29.0325	14.9846		-36.2579	59.6776	NaN			39.1812	18.5975	15.2871		-11.038	84.0459	NaN
58.4962	28.5413	14.9836		-29.6827	68.7555	NaN			41.8428	21.003	14.9043		-18.232	86.0042	NaN
59.4216	31.3323	14.6261		-31.5092	75.3698	NaN			40.8049	19.2415	14.8908		-11.1939	88.6501	NaN
60.5193	28.5403	14.6109		-12.7224	79.0571	NaN			43.032	17.0145	15.0286		-6.07786	88.4942	NaN
57.9062	30.4145	14.4657		36.9101	52.554	NaN			42.5945	14.353	15.059		-15.3905	88.567	NaN
59.9874	23.0959	15.0102		28.4076	52.8989	NaN			45.3335	15.5715	14.9233		-43.9581	78.4684	8.06922
60.1135	21.0953	15.1309		43.499	51.1699	NaN			50.1746	18.0135	14.7268		-38.3976	80.6074	7.86816
60.4573	19.2531	15.3952		39.7132	50.1552	NaN			51.5437	19.8428	14.5777		-37.7274	80.0258	7.81427
62.2947	20.4065	15.5246		37.6447	48.095	NaN			49.4889	16.4615	15.016		-38.0219	80.1164	7.68528
63.2582	18.5152	15.7806		31.3627	51.1392	NaN			50.043	16.0974	14.8334		-39.4524	78.5544	7.65775
65.1618	16.7509	16.0331		31.4004	31.0812	NaN			52.5785	11.2196	14.99		-43.5497	75.4043	7.66968
66.107	16.3686	16.1712		23.8851	35.2008	NaN			49.7138	15.8946	14.8196		-42.1071	74.0294	7.59877
67.0523	17.0548	16.2493		32.2046	23.0123	NaN			52.1629	13.0229	14.9054		-43.8593	73.7028	7.55267
68.5437	10.9112	17.0752		31.5591	23.8572	NaN			53.7999	13.2808	14.7538		-44.9871	72.5477	7.55486
68.9037	8.86945	17.4619		26.3611	17.5976	NaN			51.3192	16.0779	14.4002		-48.9683	74.9397	7.56126
68.4502	3.65881	17.7246		31.3626	18.6075	NaN			55.4166	13.4971	14.6108		-44.6008	76.2354	7.53474
66.6106	5.42455	18.2318		34.3934	11.555	NaN			60.3653	13.8781	14.4787		-44.847	73.6433	7.55047
67.4452	2.27001	18.5784		30.5204	2.20548	NaN			59.7375	10.6591	14.6534		-42.8269	75.0173	7.44158
67.5996	-0.87465	19.1505		26.3653	5.81661	NaN			59.6507	17.0049	14.1211		-44.2229	76.2398	7.34906
68.3963	-3.35223	19.6473		22.0426	3.02026	NaN			58.0781	13.2059	14.3146		-55.4752	69.0372	7.59207
67.028	0.640376	19.856		17.503	2.22003	NaN			56.6878	12.1542	14.3922		-53.5278	69.5976	7.33101
66.1468	-0.594373	20.474		16.4545	5.53655	NaN			60.0461	13.4632	14.0179		-55.2741	69.1297	7.35512
62.6155	5.94704	20.6766		11.8899	5.46755	6.06744			60.5009	12.3306	14.111		-57.0047	68.6968	7.10773
60.1944	10.5834	21.2454		12.0402	4.03878	6.14119			61.2032	11.8643	14.1312		-55.9002	66.3756	7.07046
57.0402	5.36071	21.8276		86.4243	-10.5994	31.6998			62.5655	9.85477	13.965		-56.8035	66.6318	6.93794
55.9128	10.7024	21.892		86.8522	-9.53751	31.5888			62.8336	9.57531	14.026		-60.3933	60.4457	7.14842
52.6709	11.9988	22.3311		86.1295	-10.2426	31.5472			60.4521	15.1708	13.7274		-59.9369	62.1118	6.92217
51.3859	16.5948	22.369		86.728	-13.8865	31.6809			57.9222	10.6923	14.0207		-57.7888	61.4891	6.83933
49.319	19.0076	22.6424		87.2953	-12.9773	31.4394			58.9142	11.1993	13.669		-59.804	59.6469	6.84013
52.5815	11.0083	23.438		86.879	-15.3261	31.4961			55.5768	12.5524	13.5894		-58.9485	59.9988	6.62589
55.3773	12.6205	23.5926		88.1237	-16.0713	31.3226			54.3848	11.3231	13.6272		-63.4091	55.1943	6.80338
55.3516	14.9182	23.9012		87.7644	-18.0384	31.244			50.7944	9.13999	13.658		-59.8472	58.9339	6.41728
58.9416	11.2942	24.097		88.2853	-17.0301	31.2118			50.3812	10.0355	13.6576		-68.6968	55.0881	6.82248
59.377	13.8547	24.2305		87.9948	-17.4145	31.1904			51.4859	3.72348	13.9836		-61.1296	53.4684	6.64538
59.2415	9.55481	24.6783		88.5779	-15.8669	31.0197			51.367	5.92778	13.999		-63.7316	53.9797	6.65452
56.7728	10.4663	25.0777		88.0605	-16.6909	31.0463			52.518	6.72435	13.5237		-62.5558	53.2396	6.54901
56.4144	7.90427	25.4925		88.069	-16.1834	30.9589			50.57	2.11695	13.72		-69.5816	55.2102	6.56037
56.9067	9.65449	25.773		87.4476	-18.6413	30.885			51.0591	3.3867	13.5842		-65.0789	53.7789	6.51366
58.9149	14.656	25.6311		86.1131	-18.8586	30.8137			50.5804	0.657642	13.5182		-66.1546	53.1266	6.55447
61.7503	14.8635	25.9471		84.697	-17.3276	30.7285			48.8602	-1.93083	13.6895		-68.3454	50.5359	6.53181
62.8916	10.5309	26.5851		80.9471	-14.5208	30.7343			50.8214	2.64734	13.1799		-69.304	51.4141	6.46072
66.1671	14.9228	26.6577		77.5565	-9.87391	30.6892			49.8962	1.52028	13.1332		-72.7233	48.4861	6.47182
67.152	16.27	27.0776		72.6484	-5.56785	30.6599			47.3893	-0.438663	13.4569		-73.0847	45.5903	6.45638
68.2543	19.2408	27.438		70.4998	-1.05345	30.5518			46.638	1.80342	13.4006		-74.9846	44.6778	6.2751
70.4691	16.809	27.903		69.8766	-2.61359	30.575			49.0631	9.44021	12.8616		-75.2454	41.459	6.24758
73.9138	18.5679	27.6516		70.3697	-6.01023	30.5901			47.6386	4.71046	13.0707		-77.2351	39.778	6.29578
79.3018	12.316	28.5274		71.9226	-7.16526	30.4004			45.988	1.74847	13.1147		-79.1622	38.2443	6.36039
79.0846	14.7635	28.6197		71.6741	-6.01188	30.4827			46.951	3.88061	12.7363		-73.0814	49.7054	NaN
76.1875	18.2686	28.6744		72.8328	-9.60018	30.4797			46.573	7.6664	12.4541		-70.2345	55.6609	NaN
74.9258	19.0039	28.9796		72.9063	-8.92542	30.432			48.8283	4.80271	12.5973		-75.002	48.8662	NaN
71.2639	24.2124	28.4517		73.4328	-8.69171	30.4511			50.2965	12.9983	12.1493		-74.145	43.4728	NaN
71.2616	19.2514	28.7479		72.8222	-7.79989	30.4293			50.8745	13.7379	12.1086		-68.2005	44.3742	NaN
70.8795	16.9409	28.6311		74.58	-3.04976	30.3067			47.3058	13.1117	12.0161		-70.0227	43.7568	NaN
70.391	19.5921	28.3465		75.3912	-2.84962	30.3157			46.1869	12.9136	11.7799		-71.8892	46.1082	NaN
71.0415	17.833	28.1761		75.8449	-4.81228	30.3608			46.6279	4.30633	12.1655		-71.1962	41.7813	NaN
73.5053	12.9136	28.4393		75.0925	-8.85829	30.5215			41.4276	11.0534	11.6858		-70.1262	38.2459	NaN
73.5826	12.9447	28.3711		77.308	-9.03506	30.4072			42.298	11.6588	11.788		-68.5579	38.9787	NaN
75.1042	16.4671	27.9305		77.617	-9.11503	30.483			43.5949	12.1772	11.6424		-77.4546	32.7831	NaN
74.4921	15.799	27.8888		79.4688	-6.37581	30.4324			43.7002	10.5237	11.7925		-76.6185	29.865	NaN
73.1491	17.7582	27.944		77.2209	-5.77216	30.6552			46.8413	14.9942	11.3986		-85.663	25.6786	NaN
74.3326	12.6601	27.9066		78.0976	-7.03364	30.7226			51.4905	11.4957	11.4961		-77.9625	31.6476	NaN
75.5425	11.6375	27.9047		76.9853	-1.60177	30.7099			52.0178	19.9818	10.8604		-78.4363	35.989	NaN
75.7291	9.65731	27.9852		78.1302	-2.73923	30.7481			51.8968	13.4488	11.2105		-76.6844	37.899	NaN
75.9087	7.34511	27.9556		77.7333	-0.227359	30.7554			51.707	13.2081	10.9557		-78.4153	43.7722	NaN
76.4867	7.71828	27.7921		77.501	1.77313	30.6955			47.8208	17.233	10.6981		-73.8234	45.7585	NaN
75.0617	9.07451	27.784		76.7367	0.301874	30.6692			51.2684	12.9877	10.9277		-75.8252	43.0991	NaN
75.986	8.54617	27.7809		77.1	-1.60852	30.6708			50.811	19.8486	10.3856		-70.3858	46.3013	NaN
75.1668	6.84645	27.7038		77.8818	-0.664464	30.6346			54.8348	16.4604	10.3775		-69.2919	49.5359	NaN
78.1103	8.50264	27.4762		75.219	-2.95193	30.8456			59.4017	16.6656	10.2142		-67.875	52.7225	NaN
74.4858	16.439	27.0473		76.018	-3.1207	30.714			57.1142	18.2381	10.1882		-70.0961	55.204	NaN
77.1138	14.8617	26.97		75.8983	-5.64312	30.7817			56.72	18.2437	10.082		-66.2265	48.936	NaN
76.7937	15.1605	27.002		76.0959	-6.64998	30.848			59.5114	18.6456	10.0694		-65.0048	54.8702	NaN
80.1493	17.7025	26.7066		76.1189	-5.82864	30.8208			58.9643	22.2896	9.64449		-67.2229	52.5181	NaN
80.2641	21.8635	26.1111		76.2406	-6.6382	30.8374			60.3816	17.0679	9.92973		-65.9691	54.0626	NaN
83.3537	15.9254	26.4363		71.8941	2.14555	30.6411			59.8775	21.6423	9.66079		-71.3668	51.6506	NaN
83.0081	14.0051	26.1747		65.132	4.79658	30.6603			62.2089	21.8209	9.44201		-72.8521	50.9102	NaN
83.2289	14.6253	25.9504		59.7467	10.7946	30.5039			60.3933	12.4559	9.57522		-71.2958	47.8135	NaN
83.1878	7.04576	26.087		52.4096	12.2358	30.5262			62.2354	11.6039	9.33273		-74.3169	50.2183	NaN
81.1998	10.9801	25.5758		43.6483	11.8791	30.6659			60.6312	9.50521	9.17691		-72.8581	49.8914	NaN
82.522	4.79987	25.8232		37.0012	14.4472	30.4908			64.2221	16.2359	8.97099		-64.025	54.2786	NaN
81.8501	6.75264	25.529		31.0399	14.4279	30.5097			64.9217	19.294	9.08924		-62.6193	59.8461	NaN
83.4815	2.74534	25.5328		30.5438	13.7113	30.4653			65.7803	25.9657	8.82085		-64.4327	59.4864	NaN
82.9288	4.04095	25.5026		27.2859	12.6385	30.3945			65.1494	28.4878	8.50042		-61.8552	59.4545	NaN
81.9821	4.4861	25.4393		26.4172	10.4211	30.3761			67.9554	19.9913	8.64592		-67.1447	53.1666	NaN
83.7034	6.33907	25.3043		28.0019	9.95245	30.2362			61.6617	18.7876	8.60947		-60.0207	56.9855	NaN
83.1251	10.8167	24.9922		28.7836	7.86329	30.186			62.276	16.5528	8.42038		-60.8227	60.5849	NaN
82.8385	8.9525	24.9039		29.1584	6.58143	30.0528			63.7188	14.0288	8.42624		-61.6781	64.2291	NaN
81.5262	4.60909	25.0933		31.1928	5.21209	30.029			63.5824	12.9246	8.33235		-55.9365	64.3282	NaN
80.7163	7.66442	24.9425		32.8358	5.68658	29.9636			66.6616	6.20292	8.19799		-68.0479	54.0977	NaN
79.1395	8.1248	24.8633		34.1416	5.49322	29.9052			64.373	10.7554	8.05866		-70.3179	53.6302	NaN
80.7571	14.4361	24.496		36.9844	5.28045	29.8692			65.0433	8.97609	8.33337		-65.2906	53.566	NaN
82.6126	10.4268	24.5348		37.0264	3.68188	29.95			63.3075	14.074	7.92907		-63.9289	52.4354	NaN
75.9213	13.7552	24.5068		37.6025	3.52	29.9582			62.9922	10.6947	8.06179		-59.2204	58.1258	NaN
74.431	18.889	24.1406		38.309	4.86296	29.8761			53.8385	13.5168	8.31788		-56.3848	62.6113	NaN
69.274	20.5579	24.0005		36.6325	3.99995	29.9233			54.8921	17.4903	7.82528		-49.1433	55.1187	NaN
64.0062	22.6463	23.9146		36.4055	4.74372	29.8094			52.9175	21.0781	7.75706		-50.4402	54.4422	NaN
60.7309	27.625	23.6065		36.153	5.21525	29.7426			55.0761	20.8373	7.65278		-45.0771	55.9151	NaN
55.6984	29.8492	23.4161		34.1686	7.58733	29.5806			56.3465	14.8741	7.80493		-47.3493	54.7161	NaN
53.6462	29.7923	23.3073		34.7167	6.3119	29.6313			57.2009	17.9849	7.40805		-46.8223	54.7852	NaN
50.7603	31.2968	23.1073		33.8727	9.37848	29.3107			55.3904	17.9181	7.52702		-44.5312	57.0822	NaN
52.3672	27.6725	23.0408		32.1819	9.64705	29.2522			57.1348	19.9368	7.47925		-36.4631	58.4133	NaN
46.0078	33.9109	22.648		30.0514	7.24149	29.3027			60.3319	22.1034	7.30791		-38.5536	56.2832	NaN
46.9338	34.9077	22.3672		86.0972	3.18303	23.1261			60.5119	18.1481	7.45951		-44.0087	50.9581	NaN
49.8875	32.1157	22.3953		83.9188	5.72053	23.0791			61.1106	18.9272	7.43448		-39.7911	56.8091	NaN
51.8762	32.9041	22.1356		79.4199	8.54341	23.0166			57.8621	18.682	7.47895		-41.5191	54.1629	NaN
52.5257	33.4907	22.0716		79.9726	8.93276	22.8313			59.7106	25.5461	7.09634		-42.0984	54.6345	NaN
54.5369	32.622	21.8276		78.4319	10.7703	22.7531			58.9532	22.5721	7.2302		-43.3089	51.1804	NaN
55.1453	34.5492	21.4418		77.951	10.5388	22.6897			60.0837	23.8077	6.96221		-43.4423	52.6028	NaN
57.3323	28.7866	21.7069		77.7782	2.36622	22.954			62.0904	20.9999	7.06585		-46.3891	54.1317	NaN
58.228	29.125	21.465		80.2842	12.0942	22.5201			62.4245	15.6724	7.20125		-45.0806	59.497	NaN
60.5553	27.7149	21.3186		81.3638	1.0764	22.8165			60.6255	21.3364	6.97325		-42.7436	47.7715	NaN
61.3912	27.3841	21.2177		82.3023	0.33088	22.6364			61.6417	22.3587	6.74964		-49.7709	52.3071	NaN
62.4548	23.4239	21.2885		80.8913	-0.860578	22.675			61.2824	15.3254	7.17787		-55.2775	57.1464	NaN
65.0397	18.7437	21.4216		81.1627	0.921615	22.4706			61.0545	19.0044	6.64105		-51.8306	50.3481	NaN
65.3231	14.4551	21.5688		80.217	2.75505	22.4805			53.6097	19.8566	6.86358		-54.989	51.6654	NaN
66.4722	14.3706	21.5144		80.5543	4.01039	22.3316			59.0901	19.6366	6.64616		-51.5226	55.1584	NaN
68.9543	8.3758	21.7498		78.7684	7.6053	22.2316			58.0602	22.539	6.56565		-51.6523	54.1066	NaN
69.1084	10.442	21.8032		76.821	10.6811	21.9745			60.8332	24.5617	6.51803		-54.6674	61.6366	NaN
69.6702	3.84806	22.0531		72.4959	13.3221	21.8462			57.2126	24.8875	6.64879		-52.5291	58.4019	NaN
71.8742	3.25358	22.068		68.2005	13.8952	21.7403			56.8739	26.342	6.56185		-51.8534	61.5862	NaN
73.5205	-1.25584	22.268		62.9993	15.848	21.6045			55.5758	28.2462	6.46798		-58.4116	61.8833	NaN
74.9959	-4.97058	22.5228		57.1376	15.7387	21.558			54.9092	25.711	6.32575		-51.1095	65.7774	NaN
75.426	-1.04096	22.5707		51.757	20.6289	21.1688			55.0375	27.077	6.2742		-45.999	62.1841	NaN
76.0725	-1.79887	22.6988		46.4467	19.8699	21.0775			54.7235	23.1606	6.4732		-45.5433	69.9616	NaN
76.0373	-2.74839	22.9168		39.0915	21.8061	20.8728			52.0932	30.7529	6.22076		-43.4229	71.0507	NaN
76.1737	-3.59815	23.1389		35.4334	24.0096	20.6365			49.6475	35.6565	6.04798		-42.5898	69.2949	NaN
75.8703	-8.8544	23.4585		29.1528	23.9273	20.4354			52.283	31.575	6.11691		-44.927	65.5018	NaN
77.8185	-8.51325	23.5747		26.5108	22.6991	20.2209			55.2726	38.0669	NaN		-49.2636	64.9174	NaN
77.9476	-11.5692	23.8388		24.3951	22.379	19.9314			54.3369	34.7953	NaN		-44.2778	63.7777	NaN
79.7174	-8.98362	23.8818		22.5541	20.9181	19.8548			57.7246	38.113	NaN		-37.7405	62.5578	NaN
81.6692	-10.1866	24.013		22.059	21.7747	19.4958			52.4604	42.5802	NaN		-35.9233	64.2764	NaN
81.5653	-12.1131	24.4296		20.2337	23.6389	19.1893			51.8522	42.612	NaN		-24.7317	67.1358	NaN
82.5468	-11.9443	24.6107		18.7997	21.006	19.229			48.6998	51.0277	NaN		-34.0018	67.5107	NaN
83.3922	-13.1386	24.862		15.279	21.827	19.054			51.985	51.3133	NaN		-27.0816	77.9592	NaN
84.3294	-12.8848	25.067		13.021	24.336	18.6906			56.1301	48.428	NaN		-31.0371	72.5496	NaN
82.7178	-16.7047	25.5044		12.1163	21.3071	18.6068			56.2259	47.8442	NaN		-22.3991	76.8896	NaN
76.3991	-19.8207	25.8333		10.9088	18.3304	18.6128			54.1572	43.9659	NaN		-24.412	78.7909	NaN
74.1112	-19.8517	26.1762		10.0445	16.4283	18.5222			57.908	45.2464	NaN		-26.6821	72.8029	NaN
68.4015	-19.9337	26.3853		9.88943	15.7608	18.2651			51.5316	41.0725	NaN		-22.3638	70.3217	NaN
73.967	-21.4134	26.63		10.6732	18.0667	17.8305			54.9902	35.6082	NaN		-27.545	70.3428	NaN
79.93	-22.0336	26.8907		10.9748	14.7671	17.8162			13.5733	14.4429	30.1954		-18.0341	66.8617	NaN
86.3488	-22.8552	27.2233		11.4512	14.8849	17.61			16.2666	15.9891	30.0133		-23.0779	61.371	NaN
89.2989	-3.84427	40.0142		9.836	12.353	17.5868			17.6818	14.0865	29.9655		-20.6819	63.6299	NaN
86.4486	2.68457	39.6873		11.1603	10.3977	17.5546			22.1198	15.3457	29.7184		-19.2046	70.3628	NaN
83.3934	2.40919	39.5539		8.5755	9.79618	17.5111			23.9776	16.2697	29.4328		-11.9317	74.003	NaN
82.6863	0.502387	39.5066		5.94134	7.51613	17.485			27.6803	15.5961	29.3546		-11.2822	73.9364	NaN
82.8654	0.569596	39.1716		2.56691	8.13309	17.3168			29.5932	13.2017	29.3565		-6.79121	76.2953	NaN
81.3412	-3.69667	39.1357		-27.472	18.8592	17.2634			31.8419	13.4314	29.1326		-4.8255	71.65	NaN
84.1743	0.646207	38.8693		-27.0388	19.0863	17.2752			34.0694	13.8022	28.8318		-8.78861	76.0396	NaN
86.2414	1.65079	38.7015		-28.6066	18.3704	17.384			33.6645	10.2689	28.8495		-7.4227	74.2663	NaN
85.8048	1.49956	38.6508		-29.9326	19.0691	17.345			37.5319	7.40807	28.808		1.46235	69.9271	NaN
86.5596	10.2925	36.7983		-31.9236	20.2198	17.2534			35.2843	7.76079	28.4606		-0.615915	73.8022	NaN
79.2088	10.2036	36.8309		-34.6468	19.5624	17.2112			38.7841	5.12155	28.3516		-1.21715	71.2076	NaN
72.5996	8.81487	36.9212		-37.5321	17.8612	17.1979			37.9174	2.84348	28.2047		-1.12623	77.451	NaN
64.7336	11.7424	36.6694		-41.8434	16.5133	17.1713			38.8303	4.95924	27.7012		-7.89956	88.6784	NaN
54.4265	14.1474	36.5175		-45.2085	18.8041	16.9652			36.4466	0.107908	27.6715		-1.82188	83.0642	NaN
43.8767	14.5412	36.5987		-48.1417	17.4599	16.9944			32.0569	-3.64075	27.5501		-1.85538	78.4608	NaN
34.3275	17.8343	36.4991		-50.8035	18.3165	16.836			30.5492	-10.622	27.62		-4.42068	86.7512	NaN
35.261	20.0941	36.3953		-83.9211	-26.503	85.5878			30.7529	-7.61757	27.38		1.0947	79.5859	NaN
40.0746	20.3632	36.3886		-84.2577	-19.2591	85.3154			28.8983	-1.37799	26.9092		-15.5954	85.5946	NaN
43.9352	22.0378	36.2993		-81.1106	-15.7335	85.2033			29.6577	1.97895	26.5348		-15.4608	82.9567	NaN
49.8643	24.1366	35.9991		-77.2375	-5.84758	85.0127			30.3574	1.93826	26.4604		-11.3321	75.3668	NaN
55.0778	26.4434	35.8375		-71.7404	-7.48047	85.2188			31.5861	4.88666	26.3912		-12.9284	78.382	NaN
60.9079	26.2773	35.8789		-71.0568	-3.25562	84.9735			36.1272	9.05563	26.104		-12.9952	86.9483	NaN
68.1173	26.6288	35.8881		-66.4917	-1.03219	84.7798			35.3954	16.0567	25.8923		16.6964	68.7405	NaN
67.5722	20.2548	35.6871		-64.7016	1.41661	84.6932			33.5896	7.08696	26.0502		16.7834	63.7532	NaN
68.6085	16.4644	35.3562		-63.9523	4.85902	84.462			33.2707	11.8553	25.2938		3.33701	75.1247	NaN
67.5327	7.99776	35.3081		-63.1854	7.6042	84.4124			32.8425	7.63684	25.3042		7.4456	76.2712	NaN
68.0365	7.7364	35.1762		-64.5068	9.67057	84.2363			31.1383	10.2322	24.9952		8.67706	80.5613	NaN
68.1834	7.1691	35.0074		-64.602	8.7304	84.2325			32.7193	10.8404	24.7809		2.50344	85.4133	NaN
68.8495	6.18615	34.9205		-64.5661	9.9358	84.0877			33.619	11.6176	24.7771		4.08267	82.1145	NaN
69.0657	9.4659	34.6438		-68.932	9.59453	83.8382			34.4115	14.4013	24.41		-1.21086	82.2863	NaN
66.0718	15.9719	34.4354		-70.4504	9.27342	83.6227			36.574	9.29652	24.3515		10.2277	81.3573	NaN
63.8084	19.5199	34.3905		-71.9634	7.43116	83.5604			37.3291	11.6105	23.9402		5.96454	79.0594	NaN
59.1608	25.0176	34.1937		-69.6375	6.46756	83.4654			38.2203	6.80995	24.0203		0.329219	80.137	NaN
61.3532	21.5882	34.0488		-72.2512	5.00144	83.4067			37.7624	13.5068	23.456		2.7297	78.4178	NaN
64.9733	18.3927	33.7921		-71.3717	4.51349	83.2633			39.7584	11.8913	23.3566		3.88554	75.5084	NaN
67.7396	10.8221	33.8322		-71.0151	5.84914	83.2063			40.4254	11.413	23.3476		1.76815	75.3811	NaN
66.618	12.3845	33.6528		-71.1046	7.90255	83.0689			39.9503	7.64458	23.2274		-8.89388	65.0458	NaN
64.4307	20.2424	33.3085		-71.9377	6.18114	82.9342			38.0113	9.51151	22.9244		-4.89453	58.2827	NaN
61.2274	26.2155	33.0815		-73.4149	4.27151	82.9364			37.8618	9.28329	22.6537		-6.02548	70.4814	NaN
59.0789	30.0288	33.0048		-72.9291	4.89903	82.7957			37.0376	8.94153	22.4893		-6.6467	59.9064	NaN
60.3579	31.7902	32.6376		-73.5648	4.3678	82.5654			36.3549	5.35988	22.6221		-15.2876	66.0371	NaN
59.2711	33.1384	32.3733		-74.7766	6.19232	82.3755			37.6545	6.40535	22.3508		-68.4456	55.5034	NaN
59.9868	28.25	32.3924		-74.9921	6.39313	82.25			37.1258	8.28769	22.1015		-69.1833	48.1595	NaN
62.3018	26.8592	32.2076		-74.5802	4.97386	82.2644			36.8376	9.25286	21.8856		-70.4769	45.6526	NaN
62.9668	25.3171	31.9516		-75.1756	4.6768	82.2172			38.111	5.48203	21.8716		-76.9724	42.237	NaN
66.0791	23.1478	31.7693		-77.1605	5.66951	81.9165			39.286	5.26707	21.6879		-82.065	35.9145	NaN
64.7603	21.8811	31.6022		-78.2581	5.90006	81.7259			39.5484	7.77653	21.3581		-79.2894	27.1694	NaN
64.3792	23.0558	31.4388		-74.7101	2.24299	81.8315			39.7292	6.32715	21.4592		-79.6783	25.7514	NaN
62.201	24.8681	31.4291		-78.7398	2.57645	81.5634			37.8	7.02188	21.3406		-80.0274	29.1972	NaN
64.4116	23.1847	31.2751		-76.4337	-0.656366	81.5996			37.1727	11.0558	21.012		-84.6031	28.4312	NaN
64.154	27.2939	30.8699		-79.1187	-0.7688	81.3363			36.5989	19.3776	20.1352		-83.7602	31.0835	NaN
64.0934	30.6197	30.661		-78.3851	-4.68339	81.3322			36.0236	5.24209	20.6851		-81.7856	29.9012	NaN
63.3821	30.0336	30.5844		-79.8313	-2.78308	81.0134			35.896	6.71225	20.1485		-81.8793	26.2191	NaN
62.6902	33.5165	30.3843		-79.5337	-0.481333	80.8597			35.7195	7.31819	20.0622		-79.6831	30.6139	NaN
64.5288	33.9133	30.0738		-80.6285	-2.40948	80.6545			35.831	9.40701	19.8114		-79.8551	35.0068	NaN
64.9036	35.0018	29.9084		-82.5288	-2.13545	80.4467			34.9891	12.2278	19.514		-77.5378	40.2364	NaN
65.7811	36.6468	29.7229		-83.1275	-0.865332	80.1661			32.9913	12.5322	19.4043		-80.504	38.3759	NaN
65.2899	33.087	29.7354		-76.6608	-5.45654	80.5047			30.653	16.4189	18.7585		-70.5274	38.192	NaN
67.5015	30.7933	29.4626		-81.8735	-0.878537	80.0089			30.5591	17.0791	18.3472		-67.633	33.4427	NaN
68.5069	30.5218	29.19		-83.118	-1.35212	79.7182			29.078	10.8957	18.4796		-66.3446	31.8765	NaN
67.4139	27.5566	29.1385		-80.5142	-6.66333	79.8703			27.8369	12.3739	18.1943		-74.2661	35.7222	NaN
68.0878	26.9602	28.9612		-80.0367	-6.0021	79.8369			29.2447	14.1411	17.7567		-66.2978	30.6846	NaN
67.2699	23.4222	28.9609		-82.3421	-0.961527	79.3542			28.8084	10.3231	17.6704		-70.5108	32.7879	NaN
67.6539	19.9129	28.998		-81.2567	-0.734791	79.2999			47.2627	15.7844	15.2677		-63.5487	34.4068	NaN
66.384	20.7441	28.9095		-82.0747	-3.56071	79.3705			43.2512	13.1943	15.1069		-69.9446	39.8782	NaN
66.6927	18.2349	28.8996		-80.3434	-5.75914	79.2371			43.0104	16.2997	14.4922		-65.9413	36.4153	NaN
68.1413	18.9633	28.869		-83.228	-0.931841	78.7845			42.9648	11.9107	14.412		-63.6089	38.1292	NaN
68.2817	21.9788	28.4595		-82.7196	-5.89655	78.8575			42.4803	16.2373	13.9838		-62.5788	24.9668	NaN
69.4514	20.4498	28.4745		-81.6091	-4.69111	78.6174			44.2873	14.4517	13.8553		-63.1298	26.0884	NaN
68.9205	18.1195	28.644		-81.5824	-1.15821	78.2664			47.703	12.7429	13.6395		-57.3264	28.9261	NaN
68.566	19.9291	28.4762		-85.5364	-2.67882	78.0365			49.5149	13.149	13.4811		-52.536	26.4201	NaN
68.5429	18.7403	28.3895		-81.6662	-1.84827	77.927			50.297	19.5994	13.0654		-61.5484	30.467	NaN
66.7187	16.1632	28.5887		-81.3058	-6.18457	77.9277			52.8222	16.9647	13.1065		-59.8823	30.9264	NaN
65.0933	16.4862	28.4701		-79.5789	-3.67705	77.5951			51.2137	13.6254	12.9033		-60.898	26.733	NaN
66.665	13.9657	28.5087		-79.4929	-2.73186	77.3469			45.6599	15.1545	12.4983		-61.8441	23.5866	NaN
65.2586	14.1089	28.3394		-79.7924	-5.2259	77.2492			45.601	5.13379	12.5093		-62.5365	24.1904	NaN
63.9918	13.3102	28.3351		-81.109	1.91143	76.6135			41.5594	1.40309	12.5929		-65.0814	21.0818	NaN
64.5483	16.8058	28.1333		-80.5064	-3.0524	76.6813			43.6464	6.45293	12.1113		-63.5166	8.21836	NaN
64.335	16.017	28.181		-79.3263	-2.84374	76.6322			44.0011	9.80614	11.9832		-61.6596	5.43798	NaN
64.7157	16.4523	28.3096		-82.4654	-0.316225	76.0895			44.028	14.6729	11.6814		-66.408	5.85186	NaN
65.9923	14.5283	28.3384		-84.0127	2.39621	75.7383			40.0661	16.3071	11.6261		-59.0995	6.04207	NaN
65.9563	16.0261	28.2698		-85.5194	-1.79089	75.7457			38.5743	18.9102	11.3799		-61.6655	-0.730611	NaN
66.0102	17.5877	28.2269		-86.6079	0.00309934	75.3775			39.4852	19.6897	11.1875		-63.3769	2.43321	NaN
65.7858	20.3378	28.103		-84.5639	-0.837265	75.2671			39.3375	20.1804	10.9817		-65.3016	7.94257	NaN
65.4707	21.3954	28.1203		-82.0605	1.78454	75.0192			41.1388	19.1005	10.8563		26.4373	11.4826	29.0098
65.8463	20.6829	28.1612		-83.2455	-1.83258	74.8833			43.0406	17.0628	10.5006		23.8112	13.0774	28.8502
67.2543	20.8885	28.1716		-82.3853	-0.434846	74.6253			47.6398	15.3791	10.3359		17.3797	14.2031	28.7509
66.0756	20.6343	28.152		-84.7486	-6.08255	74.5325			47.1552	17.2975	9.96586		11.2552	13.6182	28.7305
65.0343	18.3332	28.2264		-80.1935	-4.84423	74.4304			47.7573	16.5249	9.93058		5.27749	15.7911	28.3912
63.9693	15.6217	28.3159		-78.9947	-7.28325	74.4056			50.2752	18.9709	9.64879		-0.362523	14.9129	28.296
64.6063	18.1449	28.0893		-77.9328	-6.03881	74.1434			46.3419	16.7235	9.52707		-1.02741	14.6872	28.1492
65.2246	13.6132	28.3202		-78.5844	-9.5112	74.0953			42.0993	18.8697	9.19815		-2.83429	15.5249	27.9325
65.0797	15.1737	28.2012		-80.75	-10.8158	73.8346			44.08	15.3638	9.04368		-0.884898	12.8596	27.8112
64.6266	9.42465	28.5555		-77.6735	-9.2148	73.7022			43.6351	13.6073	9.0143		-0.306924	13.9141	27.5519
62.3229	13.8815	28.3588		-79.1424	-6.49579	73.2559			45.5835	18.3746	8.70847		1.13737	11.348	27.6422
62.3618	12.3084	28.3884		-79.033	-10.287	73.3448			47.1287	24.1491	8.42756		2.57338	11.7735	27.4408
59.4286	13.3977	28.2931		-74.9604	-11.0578	73.4085			47.0639	22.287	8.43179		3.85489	12.9647	27.2859
60.6092	13.9015	28.2526		-77.8121	-9.90049	73.0365			45.9147	20.4057	8.31781		3.84177	11.5231	27.2679
62.0701	13.2462	28.3575		-78.6131	-9.12088	72.7514			48.8251	17.1909	8.13514		5.14605	12.4286	27.0542
61.4326	18.2655	28.2987		-80.6552	-8.95305	72.4477			46.9167	15.1658	7.94126		7.22695	12.5146	26.9629
63.4553	14.8346	28.5277		-79.6536	-10.0622	72.3706			48.0971	14.4533	7.82248		8.0342	11.6462	26.9595
62.3511	16.6493	28.56		-78.1645	-14.8197	72.4883			47.6219	10.949	8.01289		8.83784	10.3812	27.0148
62.1008	20.8477	28.5135		-80.2195	-11.6515	72.1816			44.4094	16.4727	7.77394		8.34141	11.708	26.8241
61.5139	25.9616	28.3546		-85.9619	-6.02483	71.5418			47.2797	15.3502	7.55287		9.89568	8.76705	26.9574
59.8648	24.4643	28.4074		-80.2563	-7.61392	71.829			46.5352	14.63	7.5792		9.21614	10.5336	26.8245
57.5495	23.8925	28.3661		-83.2437	-10.8754	71.6935			48.7213	18.9583	7.16908		7.68622	11.0153	26.7726
54.8273	22.3363	28.438		-83.3418	-6.65455	71.3232			48.3988	17.5302	7.14721		7.29682	11.5821	26.8173
52.7328	21.7254	28.4979		-85.6053	-5.37614	71.0612			51.333	20.8331	6.89508		4.70636	14.3722	26.5405
46.4994	21.0941	28.5379		-84.7257	-6.98299	70.993			51.462	20.0987	6.96546		3.42002	11.386	26.6245
41.9341	20.8468	28.6044		-82.4269	-5.52482	70.7678			52.2353	23.0412	6.6289		2.00073	14.711	26.3795
35.3489	25.2108	28.4624		-85.7436	-3.73943	70.3274			52.4048	24.5189	6.55723		0.433133	13.3122	26.3507
27.5145	26.729	28.5444		-78.5539	-11.2654	70.9166			47.4022	23.014	6.50964		-0.429336	14.0194	26.2146
20.4227	29.2955	28.5268		-84.4048	-6.52921	70.2155			48.9843	21.4486	6.3879		-1.63986	14.122	26.0541
11.6736	31.2037	28.6866		-83.4409	-5.67218	70.0065			44.8077	21.9931	6.07531		-1.44379	12.1011	26.0829
7.45571	32.0886	28.6026		-80.2066	-5.92602	70.164			42.2675	19.1949	6.15068		1.46243	10.5029	26.0269
2.5169	32.3798	28.6269		-82.4699	-8.4752	70.067			42.2546	21.8419	NaN		4.03604	10.6286	25.85
-1.301	31.9264	28.7034		-82.518	-7.38287	69.8509			45.8636	19.2414	NaN		7.95461	9.90639	25.8211
-5.34791	30.437	28.9551		-82.1142	-7.75687	69.7063			46.7367	22.2779	NaN		9.55482	6.30042	25.945
-10.2446	33.6991	28.789		-80.4162	-6.76735	69.5944			47.8897	26.1646	NaN		9.9775	7.39022	25.8678
-14.8178	34.4677	28.8411		-82.4528	-8.5469	69.4497			45.7297	25.5025	NaN		9.96685	7.8637	25.8172
-18.6618	35.2639	28.9776		-81.2907	-9.66636	69.47			42.0582	20.047	NaN		10.626	6.92546	25.7859
-21.9829	35.1563	29.0526		-82.7603	-4.8959	68.9633			40.3408	13.092	NaN		8.62129	6.65097	25.8516
-22.9665	32.5852	29.2722		-79.4026	-11.7374	69.3399			27.8852	9.1074	NaN		4.8211	8.84368	25.688
-26.244	33.2975	29.1842		-83.4754	-9.85533	68.8717			23.5547	4.28474	NaN		-0.757491	10.898	25.5946
-27.8371	35.8776	29.0864		-83.0372	-15.1703	68.9479			13.2434	-0.635715	NaN		-8.06156	12.9284	25.5194
-25.0846	37.3967	29.2328		-79.4827	-11.2918	68.9124			9.89367	0.271428	NaN		-18.7587	14.1223	25.4272
-25.0666	36.6222	29.3729		-84.9007	-6.86423	68.4133			3.26188	0.94573	NaN		-28.2816	16.0074	25.3797
-21.372	40.7267	29.3758		-82.4784	-12.7623	68.7667			53.6657	4.13244	29.559		-33.5765	17.3942	25.1109
-22.4493	42.536	29.3159		-82.7226	-9.82893	68.634			56.9083	7.61224	29.2029		-38.2279	15.3363	25.1302
-19.8858	42.097	29.5237		-89.0659	1.30908	67.7819			53.5103	7.54182	29.1505		-42.3822	16.9417	24.8026
-18.1621	42.2494	29.5312		-88.5803	-3.55496	67.9683			55.1672	6.66244	29.2116		-42.9648	14.8927	24.8375
-18.427	44.0854	29.2504		-89.8236	-1.14817	67.6139			57.4057	9.8609	28.728		-41.551	16.251	24.6576
-18.1735	42.2355	29.33		-88.6324	-0.353424	67.0137			56.7756	8.01148	28.6979		-37.6242	13.6527	24.6321
-16.5769	42.0331	29.3932		-89.3063	0.104325	66.6855			56.1612	5.68041	28.6409		-37.5314	14.7	24.3541
-16.0057	41.9941	29.3269		-89.0924	-1.51892	66.4061			57.2825	8.03637	28.4585		-35.4491	13.4942	24.2721
-17.0029	42.9464	29.2314		-88.5493	-6.13885	65.6102			56.243	5.34231	28.3591		-32.883	13.9874	24.1531
-17.4369	41.0994	29.314		-89.0511	-8.88154	63.9673			55.1773	6.68465	28.0566		-31.0044	12.8262	24.0088
-17.8805	40.5361	29.2957		-80.6264	-27.8671	63.1586			53.9773	7.25305	27.7719		-29.2378	14.2829	23.7965
-18.0086	40.3854	29.1988		-82.0266	-22.8289	62.8379			51.5821	6.74914	27.6954		-29.0801	15.0655	23.6209
-17.0393	42.2848	29.0025		-83.0415	-23.5239	62.8813			50.6298	3.99977	27.6186		-29.314	17.3989	23.5233
-18.5702	39.8191	29.1363		-80.9511	-22.9973	63.0315			52.1977	7.26016	27.2118		-28.1925	15.3719	23.4717
-18.8891	38.4058	29.0953		-82.7856	-15.2875	62.5784			53.4501	3.8413	27.2158		-29.1391	13.6807	23.3771
-20.2634	37.88	28.9626		-82.2986	-19.4067	62.8034			52.8793	4.09138	26.8734		-29.1668	16.0004	23.003
-21.3758	37.4062	28.8012		-80.1391	-19.7627	62.8138			56.1974	3.80781	26.6838		-29.4987	15.9713	22.7547
-20.3941	34.5638	28.9375		-77.9478	-19.6323	62.8571			58.855	9.23426	26.3867		-31.3273	13.4159	22.7429
-21.3623	35.4094	28.808		-78.3963	-18.0148	62.949			59.949	10.8998	26.1046		-32.5822	14.1401	22.4528
-22.9988	35.4727	28.7247		-78.1115	-19.929	63.0071			61.5868	13.8646	25.8516		-32.9725	14.9583	22.1513
-23.5141	36.732	28.6304		-77.3405	-19.657	63.1495			61.9827	6.57196	25.8985		-32.4372	14.8147	21.9519
-22.3269	34.3747	28.7653		-78.5004	-18.3646	63.1431			63.999	5.26129	25.6465		-31.7495	15.7944	21.6277
-22.4469	33.8978	28.7142		-79.5219	-13.59	62.9161			65.0485	2.4886	25.391		-29.0452	16.9332	21.4267
-24.5268	31.5281	28.7311		-79.9712	-8.79721	62.8771			64.5435	3.15273	25.1663		-28.8105	14.5774	21.3401
-24.0442	34.5022	28.5135		-79.7352	-11.3776	62.9395			62.3229	7.378	24.8708		-29.1313	15.1001	20.9627
-22.4411	30.5654	28.8605		-80.2164	-5.08972	62.789			63.7793	9.60709	24.627		-28.5226	12.8255	20.8621
-24.584	31.3593	28.5429		-80.8572	-9.77174	62.9984			62.4777	10.9403	24.3664		-28.6665	9.58466	20.605
-23.5926	27.9141	28.8475		-81.3256	-5.69432	62.9066			62.9698	7.8002	24.3178		-27.8247	8.86335	20.5776
-23.0282	31.634	28.7273		-77.834	-6.70983	63.238			62.62	3.86506	24.2047		-28.9163	10.536	20.345
-21.6539	30.2655	28.876		-80.6996	-5.92736	63.1707			62.8249	2.60512	23.9007		-31.2618	12.4005	20.124
-23.3134	31.7995	28.84		-79.8416	-6.34763	63.2811			63.1275	7.13359	23.5437		-31.1173	13.3135	19.9463
-21.2847	30.5866	28.9853		-82.387	-5.82031	63.1232			63.9239	8.3483	23.3047		-32.4976	14.2046	19.8787
-23.9198	31.4444	28.7989		-80.1314	-4.35491	63.2387			63.5636	11.1008	23.245		-34.3496	16.4252	19.6935
-22.802	34.5137	28.7568		-78.5154	-11.1766	63.4654			64.5182	8.78202	23.3001		-33.7271	16.1972	19.6589
-22.1777	34.4545	28.8237		-77.342	-8.84142	63.3154			64.2679	8.2464	23.2042		-35.3109	16.3937	19.4789
-23.4502	34.1289	28.7428		-79.8004	-9.74305	63.3725			62.4869	9.63012	22.9226		-36.2836	17.3308	19.1766
-24.6791	33.4176	28.7592		-77.5952	-12.2941	63.4914			61.8627	9.59675	22.8025		-38.2886	15.5697	19.0635
-27.0292	35.0692	28.6259		-77.3823	-13.5643	63.6402			62.9761	9.09138	22.6582		-36.1856	14.4951	18.971
-25.8909	34.1935	28.6271		-76.1897	-11.4859	63.6154			62.2837	8.68726	22.4269		-35.0001	11.4437	19.0271
-25.6216	32.5091	28.6444		-77.6622	-10.9791	63.4963			60.6036	6.06419	22.414		-33.748	11.0075	18.8156
-24.4456	33.8909	28.6202		-76.717	-13.3487	63.5325			61.5801	8.49907	22.0857		-32.1999	7.48504	18.7264
-27.9163	32.6296	28.3745		-76.3783	-11.3932	63.4043			62.8932	6.88571	22.0332		-33.7278	7.71026	18.5453
-25.0895	33.3087	28.5049		-78.753	-11.3857	63.4121			61.9428	9.26953	21.7295		-33.9999	5.12422	18.5316
-26.1661	31.2521	28.4478		-72.588	-12.3599	63.6343			62.7427	7.0136	21.7174		-36.2124	4.06455	18.4577
83.2629	-29.7991	26.2406		-73.2915	-10.7482	63.585			62.6082	7.74846	21.705		-36.2135	1.50355	18.5077
83.2881	-27.4833	26.1706		-74.3992	-12.7271	63.7369			61.8878	12.261	21.3527		-36.9772	1.62995	18.4089
84.4718	-23.5134	25.9713		-79.8013	-8.22841	63.3746			59.5714	10.5884	21.2785		-36.068	1.60287	18.4052
84.6273	-21.7623	25.9767		-75.5966	-13.729	63.7842			62.819	8.78293	21.3835		-36.6828	3.79317	18.2399
85.5424	-20.3276	25.9093		-76.2091	-12.1203	63.7763			61.8164	8.03896	21.2564		-34.4645	4.76352	18.2396
85.6903	-17.9421	25.8893		-75.9887	-16.6535	63.912			62.1747	5.66265	21.1745		-32.2161	6.6618	18.2274
85.5899	-18.6191	25.9153		-78.1058	-15.7252	63.89			64.0372	8.39774	20.9187		-30.4984	12.9453	17.9053
86.226	-15.8592	25.8076		-78.0109	-10.4186	63.812			62.2669	4.36678	20.9347		-29.3672	13.118	18.06
85.9087	-15.4868	25.6839		-76.6029	-9.75729	63.8054			65.5664	6.83761	20.8134		-27.8458	15.2147	18.1389
85.2998	-16.5715	25.7093		-75.9999	-7.00973	63.8133			66.0375	5.72078	20.8046		-26.9805	18.0996	18.0653
84.7513	-17.4085	25.7		-76.7234	-4.56564	63.8084			69.0912	8.22672	20.6998		-28.2041	18.897	17.9895
83.8012	-17.4311	25.6782		-74.3618	-2.64735	63.8822			68.7474	9.80757	20.4464		-31.5292	18.0015	18.0959
84.6526	-16.7909	25.5474		-73.8998	-3.12233	63.8688			69.8096	10.1346	20.4717		-32.2797	18.8828	17.9282
85.4141	-15.4053	25.4851		-75.6274	-6.26495	63.8984			66.2577	8.90888	20.4274		-34.0781	18.8056	17.9164
85.8651	-15.9116	25.4783		-76.7477	-1.2687	63.7353			68.014	9.94366	20.16		-32.3614	19.5354	18.0302
86.2313	-13.7169	25.3436		-74.0099	-5.34641	63.8407			68.3744	10.9204	19.9292		-31.5138	22.1245	17.7544
85.7114	-15.0905	25.3781		-75.1989	-5.54992	63.8513			70.0241	13.659	19.4882		-31.9275	26.4841	17.3582
87.1421	-11.6051	25.1951		-79.7946	2.70874	63.6015			67.485	11.0322	19.7365		-31.2036	24.3678	17.3912
86.1168	-16.1604	25.2659		-80.371	-4.7906	63.9949			68.0325	16.3738	19.1945		-30.1933	20.7174	17.5709
85.5229	-17.5177	25.222		-80.0582	-7.55833	64.0108			65.8741	10.2414	19.6028		-27.4962	21.9092	17.1613
86.5015	-16.8397	25.2308		-81.0336	-8.03977	63.9943			66.2782	12.0999	19.2551		-28.7157	17.996	17.233
86.8111	-15.6538	25.2253		-82.5827	-3.58893	63.8062			67.6317	12.6951	19.1397		-30.2514	16.9267	17.06
87.5216	-13.1574	25.1975		-83.6244	-4.71458	63.8121			67.2152	16.4944	18.5496		-32.2075	16.4241	16.969
83.6004	-12.682	25.1972		-82.28	-6.98614	63.9057			65.7956	8.41075	19.023		-34.8329	15.0362	16.8554
81.0029	-9.80176	24.9665		-82.8747	-2.45068	64.0014			64.2555	12.7749	18.6004		-35.7306	10.862	16.8838
75.497	-11.9061	25.0842		-85.0465	-8.92388	64.1384			63.1344	13.8911	18.3496		-43.2414	15.9396	16.4467
71.5946	-10.2244	24.9934		-86.1821	-13.8834	64.1442			62.2904	15.1392	18.2011		-44.2011	9.902	16.6967
70.2901	-2.47329	24.8548		-85.4184	-19.7228	64.3395			60.6303	16.7109	18.0466		-45.1923	12.5137	16.4933
65.4687	-1.68226	24.781		-88.0208	-15.2122	59.8252			55.8856	16.4395	17.9497		-45.7206	13.3603	16.533
65.3249	3.64006	24.717		-84.0424	-29.5156	53.834			52.7073	18.1395	17.7636		-48.1736	16.4934	16.3112
64.7949	7.69418	24.502		-83.4146	-28.591	53.5498			51.5178	15.5104	17.8439		-46.6861	19.2103	16.0188
63.0729	10.5738	24.152		-88.1891	-13.673	51.9865			49.7687	18.3223	17.3522		-44.9343	18.7142	15.9439
64.6009	6.81363	24.4175		-87.0907	-15.4135	51.4096			50.0802	19.1442	17.0947		-43.865	20.5667	15.7055
66.1209	9.16763	24.1706		-85.4699	-12.1455	50.5949			50.194	17.5505	17.0774		-39.5781	22.0331	15.495
67.3184	10.1231	24.1534		-85.9118	-11.4506	48.5586			51.1283	19.2418	16.8954		-38.0714	20.5406	15.2334
69.6643	9.41028	24.1798		-89.6187	-4.80844	48.1627			49.5007	20.0624	16.5225		-39.2299	23.1083	14.9484
71.1572	8.6253	24.1928		-83.5807	-1.69845	48.2313			49.0478	17.7861	16.3411		-38.2236	18.9519	14.9973
71.2966	6.92107	24.202		-82.5117	6.43576	47.7407			48.7854	15.1707	16.2182		-39.7471	18.5323	14.7183
71.6819	9.62131	23.9391		-74.3465	6.75971	47.6388			51.1222	13.0546	16.0711		-40.1655	15.4471	14.756
71.9635	8.48043	23.9456		-69.3381	7.82992	47.1719			53.8025	10.4821	15.8556		-40.6941	11.4795	14.7357
71.6652	9.22159	23.8901		-64.1688	10.4373	46.5562			54.0183	8.70974	15.8489		-43.1545	11.4204	14.5314
74.0731	10.5442	23.7891		-62.2538	10.8558	46.2172			55.0666	11.6098	15.7322		-43.6514	10.1638	14.3866
75.7939	11.9459	23.6522		-52.7997	7.30946	46.3271			54.0769	12.0321	15.6582		-44.3238	8.93304	14.2743
75.5149	15.0251	23.5658		-53.3318	14.7235	45.5998			54.791	14.4945	15.5261		-44.1478	8.45751	14.2034
76.061	14.4263	23.5139		-47.8571	14.0405	45.7208			54.4051	13.3453	15.3592		-43.3566	13.3825	13.9603
75.6513	13.4035	23.4811		-51.7847	18.7005	45.1535			55.0605	14.3387	15.1099		-44.3529	17.1453	13.716
77.0415	17.0153	23.2447		-49.5222	21.523	44.8758			54.859	10.2774	15.2253		-44.425	20.376	13.7303
76.8591	12.1951	23.3951		-55.2335	24.8084	44.5593			55.0479	11.4956	15.2392		-42.04	21.0186	13.5627
77.686	12.527	23.3576		-55.2241	21.2182	44.7195			53.5973	16.4861	14.848		-44.0494	18.8168	13.4563
77.0311	15.3707	23.2172		-58.0397	22.479	44.1936			53.0899	16.0628	14.8383		-45.3563	20.7633	13.0582
78.3534	14.4536	23.1169		-58.5239	17.2307	44.306			52.3637	14.5532	14.7864		-47.2544	17.8464	13.0592
78.2011	13.877	23.0313		-61.2789	18.4598	43.973			51.9096	16.3453	14.5565		-47.2107	19.466	12.7493
79.2463	15.5351	22.7728		-60.2669	12.7545	44.2363			52.2195	19.4108	14.3987		-44.6302	20.4222	12.5422
78.9015	12.1344	22.827		-62.1728	15.5184	43.8969			50.9086	20.4838	14.1456		-43.3989	19.9671	12.3987
77.6394	11.8133	22.8096		-60.9984	13.7386	44.0463			50.8903	17.6419	14.1635		-42.6633	21.2591	12.1457
80.1334	10.4363	22.6397		-60.95	15.6267	43.7851			51.8392	17.0186	14.0962		-41.3038	19.8886	12.0063
77.8594	11.0345	22.5263		-64.5331	16.6834	43.5995			51.5217	18.268	13.8615		-40.9476	18.9049	11.844
79.0387	8.82687	22.5256		-62.1303	17.0653	43.5853			51.4532	19.1977	13.6131		-41.0719	17.8727	11.6102
77.9528	10.1385	22.4364		-65.059	17.6445	43.5512			52.6116	21.6747	13.5148		-42.8255	18.6303	11.3688
80.0432	9.26642	22.3709		-64.0721	18.546	43.3257			52.0582	25.2756	13.2182		-43.178	15.1031	11.4577
81.0399	12.7415	22.0773		-63.8691	16.7083	43.3559			52.5976	23.9491	13.0962		-43.7744	16.43	11.2432
80.5875	9.20144	22.1648		-64.8451	22.4682	42.943			50.6655	24.804	12.758		-45.3972	19.9718	10.9195
82.7791	11.0793	21.9714		-63.0173	21.8971	43.0366			54.2495	20.1522	12.8603		-46.1833	21.6601	10.6596
84.9296	9.15621	21.9163		-65.5712	23.0712	42.9429			56.6593	20.6839	12.6589		-43.2224	23.2591	10.5672
85.6174	7.56064	21.8099		-64.9001	23.2493	42.8948			53.4228	21.746	12.3985		-45.6737	21.911	10.5018
85.8773	9.9809	21.5754		-62.7661	25.1648	42.8793			53.1015	24.7284	12.0793		-42.7529	19.2112	10.5831
86.6417	4.6984	21.5503		-63.9483	30.3716	42.3204			51.7865	22.4569	12.1157		-42.8751	18.4094	10.4856
86.375	4.72158	21.3876		-66.5133	27.639	42.4243			52.477	22.8166	11.8471		-43.1592	19.4163	10.3244
85.5647	1.78226	21.3121		-66.5354	27.1732	42.4285			50.3256	22.7496	11.7205		-42.3139	22.4556	10.1085
85.9054	-0.450589	21.1581		-65.5692	26.0008	42.4653			52.4175	20.8741	11.6658		-40.9667	21.3927	10.2345
86.2865	0.909907	20.9829		-68.3204	26.2801	42.3851			52.1788	20.4069	11.74		-40.5017	25.8861	9.98155
83.9806	-2.24508	21.1053		-70.8252	30.9906	41.892			52.2505	21.8772	11.424		-39.5429	24.9177	9.80876
85.0578	-2.61561	20.9207		-70.0447	28.0357	41.9854			50.5783	19.825	11.5295		-38.9553	22.9807	9.60262
83.9253	-3.35275	20.896		-69.2558	21.2051	42.3108			48.0576	20.9483	11.1106		-39.1669	21.7256	9.37611
83.9758	-2.92856	20.7829		-69.4103	30.2048	41.562			45.8012	25.3281	10.9654		-39.8384	23.0973	9.08441
83.7549	-3.34472	20.7291		-72.4074	21.6966	41.9527			46.9069	24.7671	10.8733		-37.7022	19.2742	9.17513
83.6482	-1.4093	20.6041		-68.8713	20.5233	41.9858			46.4603	25.4031	10.7357		-36.2126	20.8732	8.91277
82.6543	-1.52482	20.6032		-69.8408	24.6	41.4135			46.8332	26.8997	10.7758		-37.8187	22.6182	8.67533
84.2528	0.0820616	20.3887		-64.6978	20.9568	41.6333			44.7291	29.3891	10.4177		-37.0245	21.2847	8.57439
85.6021	-0.603721	20.3291		-72.2832	29.1286	41.0288			43.8693	26.7425	10.4614		-37.2808	19.3881	8.46589
85.5229	0.151443	20.2602		-69.9168	21.1463	41.4908			44.3779	29.2651	10.2634		-36.7292	20.6366	8.3976
85.2366	2.36051	20.1132		-66.254	21.8576	41.6035			43.6322	26.5258	10.0279		-35.6814	22.4927	8.07212
86.1963	-1.52401	20.1406		-69.1603	27.4438	40.9303			45.8094	28.8873	9.81677		-34.1044	23.5254	7.90362
86.0465	-0.765996	20.0056		-69.2051	28.1595	40.7519			47.6876	26.1848	9.83952		-35.4985	28.1892	7.56237
87.0361	-2.83381	19.9425		-68.3222	32.3914	40.3968			46.4092	24.1526	9.74887		-33.8312	27.77	7.36353
85.872	-0.00149241	19.7774		-74.6117	25.9641	40.578			47.0753	27.0356	9.37202		-32.768	27.6873	7.08689
86.5548	-0.881028	19.7276		-73.2468	31.2329	40.1523			45.7461	23.2026	9.45458		-36.9742	27.7516	7.04687
86.2361	-0.442154	19.6296		-76.9784	28.3104	40.1583			44.2558	23.1697	9.42032		-37.654	27.423	6.78123
89.7994	0.0474818	19.4116		-78.0931	28.6408	39.9987			44.9904	23.9139	9.31881		-43.2957	31.6115	6.34162
89.1007	-12.5447	18.6372		-81.0636	26.3671	39.9936			43.5077	27.2632	9.1073		-42.7479	33.0979	6.3298
87.3935	-2.66335	15.889		-80.4063	27.3211	39.9217			43.7975	27.4352	9.27057		-44.9735	32.417	6.18677
81.0754	2.53326	15.9118		-78.2928	25.1863	39.802			44.5656	27.2638	9.02398		-48.8179	31.4821	NaN
77.638	9.49867	15.6803		-81.3477	23.1211	39.8023			42.8041	28.0373	8.80573		-50.6475	29.1391	NaN
70.463	18.2875	15.4665		-81.3164	20.2263	39.759			45.5916	25.5247	8.90055		-56.1963	28.4377	NaN
66.7305	21.0345	15.3048		-80.8593	26.3184	39.2048			42.8942	28.5739	8.75898		-56.6019	27.0754	NaN
63.2305	22.9184	15.2095		-80.5788	14.9755	39.6244			42.142	28.9446	8.63679		-55.8054	30.3164	NaN
61.4198	24.8264	14.9591		-77.8962	19.4979	39.3488			40.0335	29.8893	8.30951		-55.8691	31.9011	NaN
56.9087	29.8879	14.7367		-80.6287	16.4309	39.3402			44.3595	28.029	8.40666		-55.6152	34.1967	NaN
54.8702	30.602	14.6583		-78.349	21.0505	39.0519			41.5593	30.837	8.19231		-57.1471	34.4519	NaN
54.3189	35.2264	14.2246		-77.5289	22.4065	38.8682			41.0513	32.4814	7.95631		-55.0223	36.2058	NaN
54.1808	34.7123	14.1263		-79.4971	19.1793	38.8298			39.4751	30.4002	7.94802		-60.4971	36.1328	NaN
55.2156	32.6334	14.0571		-80.3137	18.9941	38.5957			43.9701	31.5183	7.8828		-52.5728	15.4508	16.8389
56.2018	33.9308	13.8048		-78.9429	21.4032	38.4009			38.6655	33.2583	7.42391		-56.5932	12.976	16.6857
57.7315	37.5596	13.3998		-82.0854	18.4872	38.2975			41.6658	33.0761	7.36824		-56.1826	9.0307	16.7708
60.4705	35.4427	13.2063		-80.5869	19.5485	38.0926			42.2203	35.3559	7.17062		-58.1337	8.79069	16.7143
61.6286	33.3127	12.9944		-80.1029	16.9889	37.9609			44.2088	34.4408	6.92874		-59.8492	9.5103	16.523
62.1998	31.5946	12.668		-78.2599	19.1118	37.9373			40.4918	32.5255	6.93574		-59.6771	10.4772	16.4935
63.7675	27.3532	12.6225		-80.611	24.7454	37.4024			44.0031	34.1306	6.80093		-61.9447	11.9211	16.3754
63.1814	29.2737	12.3603		-78.7741	28.677	37.2572			43.5867	39.2128	6.41059		-61.0091	9.55534	16.4856
63.2899	30.2082	12.1175		-79.4414	29.8176	37.1128			45.738	35.5152	6.32651		-62.2301	11.9251	16.2539
65.4143	29.7898	11.9907		-79.1336	23.6119	37.2368			44.9621	40.2707	6.14009		-61.8508	12.7223	16.1974
64.5978	29.8255	11.8426		-79.7097	26.945	36.8947			45.069	37.0906	6.02249		-60.8436	12.5754	16.1069
65.7362	29.7847	11.6977		-80.5493	28.6929	36.6042			44.9107	36.5657	NaN		-62.2275	12.3189	15.995
64.2663	31.6737	11.4008		-79.8668	26.8049	36.3646			46.8267	32.9665	6.04246		-62.559	11.594	15.9417
64.5566	30.8824	11.2261		-74.2202	21.307	36.6482			43.3526	39.6112	NaN		-62.7893	12.1333	15.6142
63.8119	31.7782	11.1263		-74.39	24.9598	36.1761			44.3802	37.1181	NaN		-60.8263	10.3319	15.6885
65.989	29.7264	10.9327		-69.4622	20.795	36.2827			46.6714	35.0506	NaN		-63.1808	9.10771	15.4974
67.5545	28.7148	10.8007		-70.4155	18.7142	36.1531			42.316	38.5367	NaN		-61.6154	7.42691	15.4438
65.7028	29.546	10.6789		-64.7953	23.9857	35.5463			41.1746	36.5797	NaN		-61.8367	6.07328	15.4082
69.1832	29.2835	10.4884		-67.4407	15.0099	36.0656			42.8634	36.4259	NaN		-61.0992	4.99901	15.4399
69.0835	27.3478	10.2611		-60.8966	25.6322	35.3718			38.7464	39.999	NaN		-61.2709	5.07139	15.2947
69.3777	26.6919	10.1449		-59.9218	28.9986	35.0039			37.3192	41.932	NaN		-61.7045	4.08888	15.1638
70.4487	28.7215	9.84741		-65.4242	24.569	35.3029			38.1149	44.1333	NaN		-62.4328	5.39119	15.0108
71.1361	29.7065	9.62625		-67.596	24.4255	35.1361			88.0198	1.13827	16.7274		-61.837	3.67857	15.092
71.8924	28.28	9.60657		-68.1935	26.9691	34.8362			88.7418	2.95941	16.7282		-62.5306	5.11608	14.9949
70.2219	27.2189	9.56919		-67.2672	30.1503	34.5981			86.1762	2.16618	16.7561		-62.4338	10.7133	14.6662
70.2447	27.453	9.43375		-70.2852	30.5093	34.3501			87.2766	5.1754	16.548		-59.7271	11.6141	14.7494
70.1412	30.1935	9.14719		-70.315	33.1709	33.9729			88.6135	6.17279	16.6146		-62.5062	10.7173	14.5731
68.4002	32.3454	8.93045		-71.3956	22.9326	34.4092			88.7488	14.1366	16.1707		-64.7326	11.0236	14.3943
71.6026	31.7052	8.71745		-71.2698	24.3099	34.06			87.3683	8.77801	16.2719		-64.8927	11.9165	14.2393
71.6524	30.161	8.63825		-76.2804	28.207	33.5789			87.6269	14.2517	15.9258		-67.2575	11.2555	14.1584
71.3974	31.2057	8.40225		-77.7127	29.7018	33.2504			87.4365	7.38719	16.049		-66.8387	11.3369	14.0645
75.1677	29.6658	8.21817		-72.8406	31.1373	32.9526			86.2764	7.61068	15.5786		-65.8215	10.7639	14.0256
74.2142	34.4244	7.88414		-68.9945	24.5824	33.219			84.518	8.60486	15.3336		-65.465	9.10116	13.9797
76.3832	33.5183	7.67123		-72.9255	23.298	32.9676			85.2446	4.09739	15.5038		-64.4068	11.8757	13.6656
77.1637	29.4553	7.59725		-72.0755	19.8822	32.9809			84.0699	7.8881	15.1386		-64.9194	9.13253	13.6957
76.6204	30.2523	7.38402		-70.9651	19.3314	32.8242			84.3155	1.0475	15.1639		-65.0963	12.7889	13.4003
75.7958	26.999	7.27079		-67.5856	21.7071	32.5035			82.9042	8.06336	14.758		-63.6531	11.0962	13.4061
73.4456	31.3263	6.96656		-68.1281	22.2681	32.3289			80.9449	3.3603	14.8319		-64.2561	13.9357	13.1207
74.6087	33.7432	6.81071		-66.3178	24.0137	32.0587			84.8162	-2.38195	14.9327		-62.798	11.7293	13.1236
71.9975	38.7715	6.61675		-65.993	24.5681	31.8471			84.8276	-0.383744	14.7103		-64.1544	11.8549	12.8518
70.7462	42.5048	6.37924		-68.7027	28.6341	31.2213			86.4717	-1.68526	14.6363		-61.7003	11.2076	12.8099
69.316	44.1986	6.17033		-70.7932	33.6641	30.7739			88.9972	-0.918622	14.5338		-64.0772	9.63382	12.6138
67.8834	47.3109	NaN		-70.4255	32.236	30.6404			89.3081	-3.76269	14.7549		-63.0478	12.1979	12.3713
66.8917	50.8893	NaN		-73.1965	30.7192	30.6401			89.1657	10.7802	14.0428		-61.0613	11.6	12.3057
62.7683	53.1552	NaN		-74.4835	34.5815	30.1399			88.2082	8.17868	13.8537		-53.5591	12.172	12.1855
64.3358	54.7364	NaN		-77.3128	37.2001	29.6979			87.4803	9.74141	13.6971		-49.6824	12.7399	12.0863
61.0308	51.9125	NaN		-78.7722	29.8928	30.0827			83.2898	13.5596	13.4737		-21.0377	36.1294	11.2198
61.5839	53.8587	NaN		-77.6972	31.072	29.5947			83.0523	16.2616	13.5216		-43.2169	14.3752	11.6923
59.5437	56.8525	NaN		-82.9277	29.0534	29.5375			78.6141	16.6653	13.3572		-44.0421	14.4332	11.5973
68.6527	57.248	NaN		-81.2117	29.6963	29.1775			69.5539	19.8146	13.0165		-45.264	15.5931	11.3446
63.2169	59.048	NaN		-79.9975	30.5683	28.8943			62.3003	21.0594	12.7918		-45.3376	17.2109	11.1533
66.3128	59.0836	NaN		-76.6926	33.7477	28.6532			58.2122	20.5438	12.6002		-44.9527	15.2609	11.071
66.0497	54.0206	NaN		-73.9386	28.6905	28.8607			55.2681	16.718	12.6218		-45.326	17.1046	10.7894
63.4315	58.9	NaN		-74.1752	29.5443	28.464			50.4967	16.9287	12.362		-45.4586	15.2335	10.6672
66.984	59.4189	NaN		-74.8765	27.9222	28.5233			44.7651	15.3014	12.2029		-46.132	16.7238	10.454
[truncated: 6,723 more rows]

## Sheet: 5B
Non-tracking	Euc Dist	Pitch	Mean	Median	SD	N		Tracking	Euc Dist	Pitch	Mean	Median	SD	N
	39.9113	-25.1562	-12.0948	-14.9614	16.0464	3360			37.615	-23.3544	-10.3415	-13.4809	16.0128	3765
	39.657	-27.8053							37.349	-22.079
	39.644	-26.659							37.386	-21.7134							SD	N
	39.2314	-32.5028							36.9069	-21.0383
	39.1867	-31.3591							36.933	-19.5377
	38.8124	-32.2258							36.7989	-19.2311
	38.8657	-31.3555							36.4847	-17.4029
	38.5701	-31.0083							36.2692	-16.676
	38.3251	-30.1935							36.2591	-17.1574
	38.2486	-28.6751							36.1003	-16.8296
	38.0736	-26.122							36.0561	-16.4013
	37.749	-25.3393							35.7076	-16.7856
	37.7818	-25.643							35.6665	-16.3435
	25.3828	-22.6588							35.4993	-16.5661
	25.6879	-19.4697							35.3714	-15.3643
	25.6746	-21.747							35.1649	-16.8235
	26.0697	-18.0621							35.1991	-17.1914
	26.2981	-15.4719							34.8926	-14.8292
	26.2965	-18.0648							34.9072	-17.9818
	26.5736	-14.9999							34.7141	-17.2694
	26.709	-14.9943							34.4732	-15.3053
	26.9362	-13.0665							34.4049	-16.3099
	27.1506	-12.3658							34.5476	-17.4141
	27.272	-12.8814							34.1574	-14.3875
	27.6117	-9.56906							34.0112	-12.9975
	27.7059	-11.0479							34.0469	-15.3425
	28.0273	-8.4676							33.9443	-13.6483
	28.0776	-10.1479							33.7637	-13.6686
	28.3258	-9.81059							33.5419	-12.7568
	28.1142	-14.5096							33.4538	-15.4123
	28.6671	-9.30822							33.4083	-15.4546
	28.7219	-11.2853							33.2988	-18.1244
	28.974	-11.0036							33.0544	-16.6863
	28.879	-14.0623							32.8863	-17.9238
	29.1546	-13.5222							32.6802	-16.2159
	29.283	-13.7319							32.5464	-18.46
	29.4861	-15.2928							32.4176	-21.3514
	29.8641	-12.0906							32.1682	-20.0025
	29.7131	-15.8706							32.0617	-23.2049
	30.0302	-14.4886							31.9693	-20.5823
	30.1164	-16.5046							31.8558	-22.2091
	30.3128	-14.1085							31.827	-22.407
	30.3329	-13.5997							31.6946	-19.1112
	30.4338	-16.1616							31.5724	-18.3464
	30.5069	-14.2499							31.507	-16.0498
	30.6869	-12.1748							31.3805	-15.1459
	30.8235	-10.3526							31.034	-11.6813
	30.8879	-11.3181							31.081	-12.3216
	30.8165	-11.7038							30.9134	-11.6516
	31.2677	-8.11457							30.9253	-13.5316
	31.3085	-6.46273							30.7346	-12.0546
	31.4671	-5.45039							30.5088	-10.7054
	31.6431	-4.41091							30.3297	-11.1468
	31.737	-3.05392							30.1621	-13.5251
	31.9856	-2.50379							30.1504	-14.5681
	32.0058	-4.01535							30.0361	-13.0821
	32.2487	-2.58451							29.9801	-16.0315
	32.4853	-4.68521							29.8037	-15.9005
	32.6069	-5.302							29.6389	-15.531
	33.0705	-1.97454							29.5651	-13.9413
	32.8608	-7.31034							29.4411	-14.1541
	33.2019	-4.09268							29.2112	-12.4748
	33.1417	-7.34822							29.2988	-14.7126
	33.3745	-5.53014							29.0703	-13.0358
	33.3245	-8.25754							28.8171	-10.5788
	33.6247	-5.69278							28.8837	-12.7924
	33.7791	-5.945							28.5266	-8.49234
	33.9157	-6.9496							28.5011	-7.17993
	34.0239	-5.38681							28.3049	-7.45633
	34.0784	-7.36958							28.3772	-8.56932
	34.4462	-4.49505							28.0556	-6.57334
	34.3688	-6.48521							27.7865	-8.07461
	34.5312	-7.91369							27.5974	-7.89274
	34.6538	-6.17528							27.4676	-10.1537
	34.7193	-8.01354							26.8738	-10.4067
	35.1151	-4.10158							27.1128	-13.1945
	35.0513	-6.4206							26.8334	-12.3357
	35.296	-5.11001							26.5751	-14.8063
	35.3082	-7.66271							26.5074	-16.0549
	35.6324	-4.67008							26.2357	-12.6617
	35.707	-6.75383							26.1005	-13.3566
	35.892	-7.03371							26.0713	-14.4434
	35.943	-11.5146							25.8502	-12.9303
	36.0142	-13.196							25.708	-11.2623
	36.1486	-14.1624							25.4257	-8.26378
	36.209	-13.9821							25.4024	-8.27124
	36.4254	-14.0964							25.2833	-9.26093
	36.3921	-17.147							25.1631	-8.52139
	36.6866	-15.2419							25.1889	-8.55972
	36.7383	-16.2175							24.884	-9.03766
	36.8968	-17.0273							24.6848	-8.5238
	37.0998	-15.7051							24.6975	-12.4345
	37.025	-18.1855							24.6846	-14.6451
	37.2413	-18.6176							24.4348	-12.8293
	37.2583	-19.8045							24.5047	-17.0807
	37.2982	-19.6028							24.4787	-16.5428
	37.7522	-15.0338							24.2504	-18.3522
	37.6058	-16.1684							24.0806	-17.7311
	38.0926	-12.0891							23.9353	-18.2799
	38.0016	-13.2583							23.954	-18.2701
	38.33	-10.858							23.8019	-18.113
	38.2351	-13.6915							23.6911	-15.7288
	38.7116	-8.48259							23.7269	-13.4241
	38.6031	-12.1658							23.5678	-15.0177
	38.6134	-15.744							23.3836	-12.9721
	38.7005	-15.0907							23.3984	-10.4812
	38.8694	-16.023							23.207	-11.8338
	39.1253	-14.0107							23.2052	-11.7124
	38.8327	-19.3342							22.9978	-10.7368
	39.2655	-15.6837							23.0118	-11.8429
	39.0944	-19.2995							22.8085	-12.1935
	39.5476	-15.5869							22.7537	-12.8651
	39.2888	-19.5897							22.7876	-13.5111
	39.7451	-15.3245							22.6197	-12.9728
	39.6979	-16.2509							22.385	-13.3677
	39.5222	-19.8406							22.4708	-16.6436
	39.7224	-14.8259							22.2441	-16.8085
	39.8891	-20.801							22.2485	-18.6491
	39.8967	-23.7922							22.0542	-15.9134
	39.8106	-22.9376							22.0863	-15.3267
	39.8574	-23.6425							21.9448	-14.7119
	39.9345	-24.3721							21.9012	-13.3948
	39.5913	-24.3071							22.0849	-12.0521
	39.7333	-24.9435							21.9199	-12.2858
	39.5405	-26.1707							21.613	-9.22215
	39.6255	-26.3862							21.5828	-11.1686
	39.5533	-26.4352							21.7943	-12.2728
	39.4749	-25.4331							21.5117	-11.237
	39.4254	-26.4167							21.6141	-12.2295
	39.455	-26.8491							21.4563	-13.1558
	39.7391	-25.6732							21.5996	-14.2943
	39.7256	-25.3809							21.3868	-13.3345
	39.9829	-27.8306							21.2203	-11.7244
	13.1142	-6.39517							21.4141	-13.5614
	13.1103	-5.08542							21.1056	-13.6039
	13.1412	-1.83821							21.0125	-11.9744
	13.1213	-1.38882							20.9921	-13.3285
	13.1861	-0.326989							20.8743	-11.3555
	13.1781	0.105224							20.766	-11.3287
	13.2212	1.21281							20.398	-9.74108
	13.2227	1.66743							20.5984	-10.2092
	13.3901	4.08886							20.404	-8.86088
	13.2695	3.12691							20.5753	-10.3491
	13.1717	2.82671							20.3668	-10.1324
	13.2372	3.83984							20.3292	-10.5799
	13.1768	2.89898							20.2611	-10.8415
	13.2408	4.03192							20.2218	-14.3371
	13.1722	2.32737							20.1838	-15.3247
	13.1563	3.97083							20.0815	-11.4721
	13.1904	6.09443							20.0522	-11.928
	13.5315	9.18062							20.0661	-14.396
	13.4769	9.63266							19.9492	-10.7573
	13.5633	11.4127							19.6446	-13.5184
	13.5386	10.5149							20.0166	-11.0157
	13.5466	10.9639							19.6866	-11.8815
	13.9628	14.9198							19.8797	-10.7079
	13.7686	12.2473							19.6638	-8.96113
	13.7803	12.9372							19.6604	-9.65017
	14.0274	15.7778							19.6464	-8.38485
	14.0038	16.1226							19.3935	-6.80224
	13.9917	16.3518							19.5299	-6.8158
	14.067	18.3009							19.6395	-4.10713
	13.9337	17.2372							19.3171	-1.18645
	13.9371	16.9266							19.3512	-3.62623
	14.0115	19.4255							19.1894	-2.55228
	14.0361	18.9945							19.1617	-5.54892
	14.0814	20.1313							19.1826	-5.90388
	14.0895	20.2146							19.1908	-9.64007
	13.9762	19.0708							18.9521	-12.592
	14.162	20.0802							18.8649	-12.818
	14.1843	19.5706							18.5922	-11.787
	14.2807	20.0046							18.5261	-17.435
	14.2501	19.7057							18.3771	-16.2062
	14.1152	17.6767							18.2701	-17.3597
	14.3365	20.3033							18.1696	-16.2483
	14.2174	17.8784							17.9543	-17.0319
	14.1831	17.2821							18.0741	-19.8628
	14.2347	18.8634							17.8628	-16.0131
	14.1595	17.4503							17.8963	-15.9069
	14.2811	19.5526							17.7913	-16.9882
	14.3113	19.7765							17.7077	-16.284
	14.2775	19.9439							17.7029	-13.7769
	14.2222	19.6402							17.532	-12.4597
	14.2408	20.9326							17.6382	-11.8106
	14.3477	23.6404							17.4733	-9.14127
	14.2809	22.8587							17.5047	-8.20522
	14.1825	22.9518							17.4804	-6.45133
	14.1194	22.6129							17.3021	-6.34262
	14.1053	22.6658							17.4774	-9.04276
	14.0385	23.1186							17.2778	-7.46059
	13.8423	20.4973							17.1996	-9.58743
	13.9154	21.3829							17.1647	-12.0417
	13.8087	21.4904							17.2652	-14.7344
	13.6879	19.931							17.0221	-13.9772
	13.8318	21.5537							16.8582	-15.5186
	13.595	18.5963							16.9549	-17.6574
	13.5673	19.0955							16.8559	-19.1057
	13.7488	19.3843							16.7914	-19.8808
	13.4679	17.361							16.6962	-21.8945
	13.3932	16.0548							16.7831	-25.1889
	13.4018	15.654							16.6598	-25.8856
	13.2836	12.9846							16.6104	-25.7055
	13.2996	15.9574							16.3601	-26.2222
	13.0529	9.78173							16.4598	-27.0547
	13.0481	10.429							16.336	-26.2433
	12.7937	7.66148							16.2267	-27.0127
	12.9308	2.69817							15.9036	-23.3429
	12.8875	2.56968							16.0469	-26.4065
	12.7613	0.328366							15.7692	-24.0858
	12.5799	-1.09109							15.8699	-26.8426
	12.432	-3.68399							15.6914	-25.8896
	12.6584	-7.19664							15.7941	-28.8825
	12.3276	-11.2586							15.5735	-28.1797
	12.27	-12.1087							15.5563	-29.6702
	12.1264	-15.2115							15.4895	-29.5935
	12.2727	-15.7827							15.422	-31.1913
	12.781	-16.5168							15.2435	-29.7536
	12.6244	-18.9257							15.1811	-28.2306
	12.502	-21.2769							15.0666	-27.3027
	12.095	-22.4455							14.9652	-24.9462
	12.4486	-21.0198							14.9757	-25.2146
	12.1806	-25.8653							14.8129	-21.6253
	11.9241	-25.1925							14.7266	-19.9988
	11.8825	-26.9212							14.633	-18.3254
	12.1754	-25.3619							14.4227	-15.352
	12.362	-23.87							14.4173	-14.5104
	12.3934	-24.7296							14.2047	-11.8914
	12.1494	-28.1939							14.1548	-13.4518
	12.1525	-27.5895							14.1474	-13.9637
	12.3045	-27.786							13.8423	-11.4457
	12.5474	-24.1197							13.8209	-13.0309
	12.6269	-23.93							13.686	-11.3749
	12.5993	-24.6415							13.4868	-11.4913
	12.5225	-22.0895							13.316	-9.27132
	12.7745	-19.0183							13.1505	-10.7673
	12.8134	-16.3508							13.179	-11.3945
	12.9729	-16.5538							12.9721	-10.7946
	12.6506	-18.626							12.9011	-11.4053
	12.4934	-14.4878							12.7186	-11.1565
	12.5816	-15.8893							12.5943	-11.3814
	12.5942	-15.5355							12.5317	-12.4465
	12.6728	-17.0486							12.3429	-12.611
	12.6601	-17.0551							12.3697	-15.0241
	12.516	-17.6641							12.1536	-14.3536
	12.4544	-18.8814							12.1144	-17.4049
	12.4597	-18.0938							11.9111	-15.9119
	12.3732	-21.6175							11.6875	-15.4981
	12.3322	-19.1504							11.5168	-14.9472
	12.2409	-21.5658							11.6209	-18.4398
	12.0989	-23.7863							11.3455	-16.3851
	12.1618	-25.4336							11.2998	-17.2036
	12.0224	-26.1962							11.0574	-15.3429
	12.1095	-30.7216							10.8534	-15.2948
	12.0611	-31.6209							10.6739	-16.7147
	11.7778	-34.4328							10.4867	-14.8004
	11.6277	-34.1334							10.2419	-15.0712
	11.6682	-36.7334							10.0749	-14.5654
	11.5712	-39.3677							9.92158	-14.6145
	11.4444	-39.2795							9.89693	-16.2502
	11.3638	-42.1293							9.50505	-14.1029
	11.4221	-44.2073							9.42705	-14.9529
	11.1532	-40.423							8.99596	-12.8145
	11.1372	-40.1259							9.05082	-16.861
	11.0878	-39.5254							8.81315	-16.1091
	11.0282	-39.5668							39.8608	-10.4929
	11.0131	-40.1735							39.8492	-11.1016
	10.9347	-39.2725							39.5108	-9.12842
	10.8593	-39.7136							39.4169	-10.6411
	10.8315	-38.2517							39.322	-12.7318
	10.6854	-37.3154							39.2663	-13.5125
	10.6556	-35.8994							38.9789	-11.8185
	10.6348	-36.2192							38.7676	-12.3466
	10.7145	-36.3495							38.5665	-11.6415
	10.7623	-36.6111							38.6033	-12.4302
	10.7614	-37.0736							38.5632	-12.8022
	10.5134	-36.9999							38.2681	-11.3783
	10.4396	-37.3157							38.0315	-10.6943
	10.4633	-38.2391							37.9273	-11.0659
	10.1907	-35.5077							37.866	-13.0866
	10.2426	-39.0506							37.7516	-14.4817
	10.2377	-37.6886							37.5005	-13.7379
	10.1842	-37.4103							37.4577	-16.5743
	10.2261	-40.7539							37.1467	-16.0864
	10.018	-38.3735							37.1606	-17.8861
	10.1007	-39.4296							36.9002	-17.434
	10.0809	-37.0039							36.8555	-18.4512
	10.0827	-36.9892							36.3918	-14.6665
	9.88002	-38.9007							36.414	-17.3636
	9.77812	-38.8672							36.1052	-15.725
	9.69632	-38.2141							36.1142	-17.6762
	9.8669	-37.9047							36.1735	-21.551
	9.90456	-39.5187							35.7938	-17.5889
	9.95905	-38.7928							35.566	-16.9165
	9.81325	-38.7039							35.8029	-21.605
	10.0331	-40.8839							35.447	-19.9668
	10.1758	-41.95							35.4035	-20.5533
	10.1901	-42.3087							35.1919	-18.7516
	10.2682	-43.4386							35.0191	-18.0615
	10.3165	-43.9611							34.8547	-16.7227
	10.3693	-42.5254							34.7285	-15.7148
	10.4843	-42.4086							34.4175	-13.6423
	10.4921	-40.0632							34.5608	-15.7735
	10.5988	-38.9378							34.3807	-12.6037
	10.8744	-39.1229							34.202	-13.6807
	10.8756	-40.3504							34.0412	-11.5785
	10.8103	-38.1286							33.9881	-12.482
	10.8677	-37.4704							33.7147	-10.3118
	11.0212	-37.3998							33.5894	-9.38954
	11.1409	-36.1265							33.6225	-12.1953
	11.172	-37.8974							33.3316	-10.3781
	11.3484	-37.7207							33.0788	-8.82393
	11.4	-37.9336							33.0363	-10.1964
	11.6848	-38.7049							32.842	-9.9556
	11.6254	-39.0685							32.8358	-11.4383
	11.7873	-38.4209							32.6929	-11.1648
	11.7426	-38.1736							32.5045	-11.4516
	12.079	-41.1773							32.4089	-11.3303
	12.1295	-41.6058							32.2162	-11.8073
	12.3059	-44.294							32.1395	-14.6396
	12.4391	-42.478							31.9306	-14.4944
	12.6035	-41.4823							31.8704	-15.2956
	12.8266	-43.4782							31.7569	-15.0312
	12.8842	-42.2522							31.5518	-15.639
	12.9784	-42.2481							31.5206	-16.5504
	13.1621	-44.5104							31.5633	-17.7854
	13.1893	-41.9844							31.4062	-17.0521
	13.5058	-43.5369							30.9471	-14.8133
	13.4112	-42.8383							30.9976	-16.8037
	13.3474	-43.2383							30.9452	-15.1378
	13.6591	-43.3584							31.1273	-18.427
	13.5751	-43.3807							31.1293	-19.828
	13.3665	-43.0307							30.7286	-17.4865
	13.3434	-43.4826							30.7008	-17.0736
	13.3983	-42.8112							30.39	-16.8887
	13.4627	-43.5627							30.4343	-16.7783
	13.4527	-44.5952							30.1763	-17.2342
	13.2603	-41.8537							29.9457	-15.7728
	13.3696	-41.175							29.9255	-16.1184
	13.2165	-40.3835							29.6841	-13.6021
	13.2999	-40.3837							29.5144	-11.8072
	13.1531	-37.1412							29.4782	-10.5996
	13.1814	-37.6862							29.2389	-10.4159
	13.1332	-39.5367							29.2667	-11.2983
	13.0515	-38.431							29.0868	-10.4472
	13.0349	-38.1802							28.982	-9.91607
	12.8136	-36.3739							28.8501	-9.3521
	12.7688	-36.0032							28.7136	-9.2678
	12.7236	-35.6726							28.7537	-10.4593
	12.6146	-36.4438							28.5682	-10.755
	12.4918	-34.9849							28.4454	-8.57199
	12.1761	-31.9101							28.3948	-10.463
	12.1548	-32.0973							28.1422	-10.486
	11.9647	-29.3777							28.2759	-12.4136
	11.9235	-30.136							27.9858	-11.1395
	11.9195	-30.0817							27.9922	-11.549
	11.4504	-26.6944							27.9384	-12.3984
	11.5028	-27.3361							27.7493	-10.6756
	11.3129	-26.3794							27.7727	-11.2464
	11.2062	-26.3749							27.5814	-11.0056
	11.0438	-26.2934							27.4529	-9.80885
	10.7385	-25.5674							27.405	-9.52335
	10.5649	-23.1807							27.3683	-8.70871
	10.6224	-24.1388							27.2908	-7.10047
	10.3902	-21.9677							27.2382	-7.19271
	10.2271	-21.9739							27.0953	-5.79805
	9.82365	-17.5917							27.0689	-6.14159
	10.0042	-20.2298							26.7451	-4.95635
	9.56564	-15.7818							26.6562	-4.58882
	9.41438	-15.5181							26.5792	-3.03086
	9.22799	-14.4695							26.4646	-3.7379
	8.93394	-13.2558							26.4583	-5.16129
	8.58855	-10.4505							26.3091	-4.47888
	8.14777	-7.17331							26.1578	-3.49184
	8.19619	-9.66118							26.1564	-5.52179
	7.79718	-7.53676							25.9716	-5.16227
	7.54543	-7.47239							25.7166	-3.30622
	7.41491	-9.1461							25.6234	-3.53734
	7.029	-7.3309							25.5874	-4.47477
	6.82418	-8.55763							25.4431	-3.67443
	6.83751	-12.2384							25.18	-3.16444
	6.58267	-11.729							25.201	-5.22482
	6.59905	-13.4976							24.9539	-4.73507
	6.43073	-13.3828							24.8065	-4.77126
	6.53534	-16.3931							24.5726	-4.28422
	6.34374	-13.636							24.5898	-6.94426
	6.53402	-16.5219							24.3911	-6.0451
	6.45822	-15.3057							24.423	-8.31756
	6.01545	-11.8243							24.1683	-6.89947
	6.19741	-14.1148							23.9212	-6.04419
	6.01542	-9.39356							23.849	-4.58888
	6.42845	-3.34879							23.7186	-5.70949
	6.68776	-2.75902							23.7917	-7.30002
	7.0847	-0.804783							23.5153	-6.08805
	7.43724	1.01775							23.3145	-6.11698
	7.56053	3.48413							23.2137	-7.58928
	8.25288	0.716534							23.1116	-6.23767
	8.53587	0.67992							22.942	-7.33018
	8.70147	4.30261							22.7273	-5.73406
	9.17745	-0.188485							22.4827	-3.85152
	9.52359	-0.68582							22.2848	-1.02896
	9.40526	2.41969							22.1533	0.611103
	9.94403	-1.01389							21.939	0.584954
	10.1349	-1.09006							21.9126	1.40548
	10.5844	-5.37137							21.699	3.04976
	10.8453	-6.97731							21.5484	1.74551
	10.8457	-5.09088							21.3295	2.73114
	11.2367	-10.4222							21.2256	2.75177
	11.2164	-9.83978							21.1341	3.02743
	11.6637	-14.4461							20.8885	4.0749
	12.0278	-16.6914							20.5938	4.66711
	12.1781	-15.0174							20.4688	4.81403
	12.5556	-16.9515							20.3318	2.57265
	13.0229	-20.5789							20.2351	1.48963
	12.886	-17.8263							19.9109	2.75021
	13.1831	-16.46							19.7119	1.57917
	13.4139	-17.0069							19.6012	0.634629
	13.7791	-15.3019							19.4969	-2.0092
	13.9632	-13.6913							19.2509	-0.956656
	14.0604	-11.7233							19.1591	-2.23282
	13.8371	-5.55889							18.904	-3.13316
	14.1485	-4.45617							18.9118	-4.32952
	14.7421	-5.20221							18.6572	-4.58936
	14.9254	-3.16127							18.4716	-4.9529
	14.7554	0.0220311							18.2443	-5.48964
	14.4814	3.41832							18.0812	-7.06626
	14.8166	-0.167221							17.9298	-8.17748
	15.1595	-2.8933							17.7944	-8.70145
	15.2318	-2.32718							17.6036	-9.81863
	15.1961	-1.88559							17.5145	-10.2153
	15.6746	-2.73163							17.3855	-10.2907
	15.9022	-4.35569							17.1469	-10.2439
	16.0114	-3.52853							17.1907	-9.19271
	15.8465	-2.4186							16.9167	-10.5022
	16.2605	-3.65005							16.8374	-10.4237
	16.536	-3.06201							16.7751	-10.9927
	16.5821	0.682348							16.6333	-9.42279
	16.5865	4.05403							16.4258	-8.3732
	16.342	8.34952							16.2372	-6.77048
	15.9935	12.6129							16.07	-5.88147
	16.1104	14.2949							16.0889	-5.90966
	16.2194	15.233							15.889	-3.76544
	16.1547	15.7194							15.6993	-3.68605
	16.2569	13.2155							15.6295	-3.69236
	15.9725	10.9363							15.5595	-3.67847
	15.9277	10.185							15.2909	-2.38874
	15.9866	8.68321							15.0988	-2.63687
	15.8481	7.54809							15.0935	-3.00171
	14.9941	7.60134							14.8175	-2.77557
	15.4688	1.57282							14.6291	-2.22757
	14.9846	0.676965							14.5044	-3.47622
	14.9836	-2.12343							14.3602	-3.87758
	14.6261	-2.35591							14.2371	-4.03758
	14.6109	-4.19966							14.1563	-4.7565
	14.4657	-5.96294							14.0467	-5.07487
	15.0102	-8.13912							13.8383	-6.63008
	15.1309	-11.1388							13.8056	-6.50361
	15.3952	-10.0835							13.6555	-6.98321
	15.5246	-8.44667							13.4202	-5.44
	15.7806	-9.30891							13.4699	-7.58182
	16.0331	-10.8337							13.3296	-7.04879
	16.1712	-7.38494							13.1	-5.3633
	16.2493	-5.45326							12.9234	-4.34949
	17.0752	-9.23347							13.0184	-6.19093
	17.4619	-10.7906							12.8557	-5.60988
	17.7246	-12.6993							12.7	-5.00283
	18.2318	-13.3787							12.6446	-4.37959
	18.5784	-15.4726							12.521	-4.86525
	19.1505	-19.26							12.3457	-3.48909
	19.6473	-23.3835							12.2153	-3.12077
	19.856	-20.2896							12.0578	-3.21883
	20.474	-23.0881							12.1522	-5.25776
	20.6766	-20.3145							11.8287	-4.28749
	21.2454	-19.2274							11.7724	-6.98993
	21.8276	-25.9808							11.6695	-8.39532
	21.892	-22.8638							11.6651	-11.216
	22.3311	-21.9402							11.5845	-10.7209
	22.369	-17.2137							11.6728	-13.8375
	22.6424	-13.6295							11.5063	-14.5924
	23.438	-19.9549							11.3806	-16.374
	23.5926	-17.6054							11.3144	-14.1756
	23.9012	-15.852							11.1553	-17.2743
	24.097	-16.892							11.0719	-18.2942
	24.2305	-15.1943							11.0103	-18.6306
	24.6783	-17.9839							11.0159	-21.1834
	25.0777	-18.3904							10.8143	-19.0724
	25.4925	-21.2306							10.8877	-21.0122
	25.773	-20.6059							10.6055	-18.2051
	25.6311	-17.2257							10.4298	-16.7474
	25.9471	-16.847							10.0482	-13.9199
	26.5851	-19.3367							10.0763	-13.7111
	26.6577	-17.8891							9.87013	-14.1499
	27.0776	-16.8918							9.79588	-11.9238
	27.438	-14.7534							9.60736	-10.0182
	27.903	-13.1861							9.52355	-10.0218
	27.6516	-10.0405							9.35009	-8.4019
	28.5274	-11.1808							9.20599	-7.53963
	28.6197	-8.56854							9.2403	-7.91769
	28.6744	-9.241							8.85161	-2.51404
	28.9796	-7.5639							8.83021	-4.67241
	28.4517	-6.67468							8.76189	-7.85614
	28.7479	-8.38898							8.97933	-6.14527
	28.6311	-9.02379							8.91397	-6.63557
	28.3465	-6.8611							8.7202	-6.95706
	28.1761	-8.40631							8.63879	-9.30745
	28.4393	-10.6488							8.84557	-9.09458
	28.3711	-8.97203							8.61643	-8.45624
	27.9305	-7.12068							8.77905	-12.279
	27.8888	-6.62042							8.36062	-9.58747
	27.944	-7.88469							8.15654	-7.0636
	27.9066	-8.15319							8.11561	-9.99002
	27.9047	-8.4127							7.93854	-8.19494
	27.9852	-8.03622							8.04646	-7.4622
	27.9556	-8.55321							8.07895	-9.00772
	27.7921	-8.28481							8.08125	-8.62301
	27.784	-8.54204							8.14253	-8.03897
	27.7809	-6.69782							7.93711	-5.95113
	27.7038	-8.95094							7.90534	-7.13216
	27.4762	-10.5774							7.78194	-7.64621
	27.0473	-7.74364							7.74342	-7.88418
	26.97	-7.07729							7.79222	-7.70347
	27.002	-6.33737							7.73838	-7.67824
	26.7066	-2.32712							7.69674	-6.61433
	26.1111	-0.0851308							7.34511	-5.72567
	26.4363	-0.239191							7.58471	-6.95533
	26.1747	0.420166							7.42766	-7.99232
	25.9504	0.730038							7.46036	-9.49523
	26.087	0.891502							7.34203	-8.0207
	25.5758	1.25152							7.53436	-10.4564
	25.8232	-0.834176							7.25578	-8.38256
	25.529	-1.09738							7.33442	-10.3112
	25.5328	-4.40867							7.24785	-10.0795
	25.5026	-7.64387							7.3634	-13.1237
	25.4393	-11.1685							7.39948	-16.3366
	25.3043	-11.4329							7.00166	-13.7577
	24.9922	-12.4							7.11649	-14.8936
	24.9039	-14.2296							7.06998	-17.3896
	25.0933	-21.3391							7.09608	-18.1054
	24.9425	-20.5399							6.93352	-19.1482
	24.8633	-22.6534							6.82043	-16.1039
	24.496	-22.1045							6.74667	-18.4561
	24.5348	-25.0582							6.80359	-20.801
	24.5068	-22.835							6.76546	-21.1825
	24.1406	-24.087							6.68827	-21.4639
	24.0005	-22.2842							6.48802	-18.0009
	23.9146	-24.1823							6.44431	-17.2827
	23.6065	-22.3317							6.30068	-16.9634
	23.4161	-19.6161							6.15851	-16.5564
	23.3073	-22.2084							6.20637	-15.0046
	23.1073	-23.3137							6.1204	-15.8967
	23.0408	-22.7033							6.05034	-13.9178
	22.648	-21.1292							7.49365	-11.6285
	22.3672	-20.7882							6.57587	-10.214
	22.3953	-21.8281							7.22813	-8.04396
	22.1356	-21.2164							7.70992	-9.50162
	22.0716	-20.7509							8.22188	-7.80089
	21.8276	-20.1413							8.12488	-7.27141
	21.4418	-18.7677							8.41134	-9.21873
	21.7069	-20.9313							8.48731	-7.71654
	21.465	-20.0977							8.79855	-9.673
	21.3186	-19.6883							9.37583	-9.71067
	21.2177	-18.8822							9.44866	-9.54185
	21.2885	-17.3977							10.1131	-10.6743
	21.4216	-17.4254							9.95389	-12.7446
	21.5688	-16.4452							10.5855	-14.6808
	21.5144	-15.6763							10.5725	-12.1168
	21.7498	-16.0715							10.4266	-12.3651
	21.8032	-12.5743							10.3309	-12.0554
	22.0531	-14.6487							10.0591	-13.0561
	22.068	-13.8118							9.97828	-15.1951
	22.268	-13.1243							9.41282	-13.1212
	22.5228	-13.3253							9.71685	-12.3626
	22.5707	-13.9892							9.85569	-14.9454
	22.6988	-12.6396							9.32797	-10.9961
	22.9168	-13.5574							10.0989	-11.398
	23.1389	-14.3187							9.73713	-12.3489
	23.4585	-15.5101							9.26585	-12.9565
	23.5747	-12.9463							9.18249	-7.91464
	23.8388	-12.7249							8.99459	-8.71686
	23.8818	-12.1318							8.80379	-8.6356
	24.013	-13.0653							8.52829	-6.60454
	24.4296	-10.8268							8.38118	-6.51677
	24.6107	-7.52251							8.747	-4.60716
	24.862	-8.43029							8.60739	-5.18911
	25.067	-4.95521							7.8727	-4.39386
	25.5044	-4.4736							8.29156	-4.53312
	25.8333	-4.9815							8.0903	-3.07227
	26.1762	-4.86604							8.01849	-2.81664
	26.3853	-5.8041							8.33775	-3.73399
	26.63	-6.44734							8.48875	-4.27369
	26.8907	-6.97882							8.43524	-4.10148
	27.2233	-10.3242							7.90406	-2.84918
	27.526	-10.2007							7.95085	-4.72469
	27.8524	-11.2254							7.87466	-4.6699
	28.2605	-13.8707							7.88259	-4.96056
	28.8405	-14.1586							7.58118	-2.97562
	28.9723	-14.4428							7.79321	-3.71681
	29.3882	-14.2744							7.69727	-3.08139
	29.824	-14.6848							7.8223	-4.63058
	30.5065	-15.3743							8.07068	-4.83967
	30.9698	-13.3782							8.03192	-5.35691
	30.9794	-11.1669							7.81125	-4.22923
	31.3777	-10.0861							7.70535	-3.22958
	31.6983	-9.64371							7.46244	-2.14627
	31.8407	-9.31158							7.30304	-1.39579
	31.7465	-7.90831							7.11217	-1.69192
	31.7679	-11.0914							6.9175	0.0657957
	31.9822	-12.1381							7.10052	-2.38237
	32.0564	-11.0552							6.66645	0.257339
	32.1706	-15.7766							6.8964	-2.77109
	32.4553	-15.8779							6.71896	-5.20251
	32.2357	-18.44							6.58861	-4.54222
	32.4799	-16.6055							6.43286	-5.22965
	32.5573	-16.0872							6.4566	-4.87275
	32.5128	-16.826							6.14715	-4.09418
	32.5269	-17.3422							6.32246	-6.19465
	32.9415	-16.5151							6.11797	-5.28863
	33.054	-17.077							6.12164	-6.08213
	33.3814	-14.0096							6.17237	-26.5255
	33.5633	-14.6921							6.23153	-28.1151
	33.6185	-13.9833							6.40746	-28.3598
	33.6658	-12.9273							6.34866	-29.4674
	33.8566	-14.6348							6.68963	-27.6659
	33.9499	-14.65							6.98707	-27.7654
	34.1658	-15.858							7.0801	-27.5578
	34.3461	-12.5266							7.26471	-26.2587
	34.5009	-14.5276							7.23629	-25.0059
	34.6734	-16.4405							7.53839	-25.8761
	34.9538	-13.7009							7.39627	-23.4788
	35.247	-14.6416							7.21406	-22.4029
	35.5528	-10.1647							7.1684	-20.2052
	35.7791	-9.94847							7.25765	-20.1204
	36.2051	-8.22532							7.32545	-20.0682
	36.4367	-9.80363							7.35231	-20.6195
	36.6622	-11.8832							7.22336	-19.8921
	37.0527	-12.6173							7.53373	-20.3912
	37.1549	-13.8275							7.31044	-19.8157
	37.2433	-15.4091							7.41149	-21.5432
	37.6037	-15.8722							7.1529	-20.7006
	37.7831	-18.9457							6.98135	-22.2314
	38.088	-19.8925							6.71106	-21.7949
	38.3825	-19.6486							6.4436	-21.9583
	38.6494	-23.8637							6.08868	-23.3211
	38.6937	-23.0818							6.10945	-21.3851
	39.0509	-20.6639							9.4873	-15.5664
	39.1611	-18.7364							9.88356	-15.5489
	39.3036	-21.4047							10.0261	-14.3574
	39.5341	-19.8858							9.96654	-15.4283
	39.7045	-18.5954							10.2478	-14.5076
	39.8711	-17.0099							10.5194	-13.38
	39.9775	-29.608							11.1172	-6.90016
	39.6873	-27.9606							10.9588	-12.0186
	39.5539	-30.4615							11.045	-11.639
	39.5066	-30.9865							11.6002	-4.60794
	39.1716	-29.7572							11.555	-1.25739
	39.1357	-30.7314							11.4553	-9.77054
	38.8693	-31.379							11.7312	-8.26975
	38.7015	-30.9501							11.9554	-7.20896
	38.6508	-32.6349							11.9985	-8.4337
	38.4297	-31.7985							12.4363	-8.55264
	38.1688	-32.2656							12.3759	-13.1061
	38.1228	-34.285							12.7529	-9.38819
	38.0364	-31.5413							12.6447	-13.386
	37.8287	-32.1478							12.7632	-14.1145
	37.6645	-30.9155							12.528	-19.1899
	37.5696	-28.2827							13.011	-13.5872
	37.4704	-27.1991							13.0145	-18.8659
	37.379	-25.4477							13.4768	-13.251
	37.195	-23.0773							13.1687	-20.7152
	37.2144	-22.7593							13.477	-16.8984
	37.1464	-22.5021							13.4782	-20.519
	37.1447	-21.8658							13.388	-24.2086
	37.0203	-22.2152							13.6211	-21.359
	37.1119	-21.1316							13.6634	-24.1948
	36.9235	-19.1544							13.7467	-23.1453
	36.7731	-17.7198							13.7424	-22.7255
	37.0417	-19.9536							13.8334	-20.7505
	36.9686	-19.8399							13.8951	-20.5057
	36.8559	-19.5689							13.9301	-18.3037
	36.8539	-19.6269							13.8061	-20.9441
	36.881	-19.5311							13.3971	-26.5595
	36.9095	-19.2765							13.0843	-30.0688
	36.953	-18.651							12.8098	-30.1885
	36.8566	-16.3567							12.848	-26.9146
	36.8332	-16.9905							12.5362	-30.3662
	36.7573	-16.8664							12.3478	-28.5805
	36.7983	-17.2911							12.5929	-27.005
	36.8309	-17.391							12.3382	-26.2056
	36.9212	-18.9904							12.2685	-20.2892
	36.6694	-18.661							12.4326	-14.4767
	36.5175	-18.0283							12.0272	-17.9693
	36.5987	-18.0555							12.1558	-15.1485
	36.4991	-17.8188							11.7684	-12.7251
	36.3953	-18.9727							11.7692	-7.48913
	36.3886	-18.8826							11.6465	-5.02027
	36.2993	-18.1022							11.4434	-4.16326
	35.9991	-18.0426							11.3774	-2.24721
	35.8375	-17.6926							11.1727	-2.35295
	35.8789	-19.0678							10.8644	-2.63
	35.8881	-18.8416							11.0685	0.184004
	35.6871	-20.3514							10.7294	0.697982
	35.3562	-17.8799							10.99	13.4436
	35.3081	-19.3736							10.5513	8.57542
	35.1762	-18.7119							10.314	9.79176
	35.0074	-19.8418							10.1693	8.8301
	34.9205	-21.022							10.5492	17.6371
	34.6438	-20.4115							9.92843	11.6807
	34.4354	-18.7992							10.2531	15.9283
	34.3905	-19.9284							10.1528	19.2255
	34.1937	-19.6497							9.83117	14.4191
	34.0488	-19.6464							9.97732	18.4063
	33.7921	-17.7875							9.89481	20.728
	33.8322	-19.5281							9.74516	19.913
	33.6528	-18.6673							9.71456	22.7239
	33.3085	-15.68							9.64145	21.0651
	33.0815	-14.9216							9.4318	21.2368
	33.0048	-14.9967							9.35974	22.5686
	32.6376	-12.5518							9.27997	22.289
	32.3733	-11.3214							9.21645	23.1015
	32.3924	-14.0013							9.21316	32.3505
	32.2076	-14.1412							9.04292	34.6784
	31.9516	-14.7641							9.06617	33.9036
	31.7693	-14.8215							8.69581	34.0718
	31.6022	-17.3599							8.8429	33.5302
	31.4388	-18.5387							8.56416	34.4986
	31.4291	-20.3447							8.52886	35.0597
	31.2751	-23.4153							8.30246	34.3584
	30.8699	-20.7915							8.15047	30.2377
	30.661	-20.0882							8.18248	27.732
	30.5844	-22.0706							7.56015	20.7934
	30.3843	-20.6145							7.93628	26.9224
	30.0738	-20.3689							7.77227	24.0405
	29.9084	-20.2034							7.63084	22.6516
	29.7229	-18.9189							7.37619	19.529
	29.7354	-20.4535							7.33472	22.4453
	29.4626	-19.6729							7.12379	26.3532
	29.19	-18.7002							7.19729	19.4133
	29.1385	-20.9832							7.00096	21.2095
	28.9612	-20.0488							6.74726	22.0471
	28.9609	-21.2963							6.7209	16.3044
	28.998	-23.7479							6.69742	16.762
	28.9095	-23.8287							6.35894	13.0603
	28.8996	-24.608							6.08206	12.866
	28.869	-23.6646							6.28996	11.8244
	28.4595	-19.9332							6.01664	2.31912
	28.4745	-20.1816							6.08136	-25.353
	28.644	-18.8328							6.8147	-22.2273
	28.4762	-18.4951							7.0239	-23.51
	28.3895	-16.7979							6.60359	-20.1404
	28.5887	-17.5031							7.0269	-15.9792
	28.4701	-18.2753							7.21579	-14.4078
	28.5087	-18.6442							7.62756	-16.3863
	28.3394	-19.3153							6.90616	-12.7835
	28.3351	-20.8447							8.05513	-15.5612
	28.1333	-20.1905							7.75928	-15.0828
	28.181	-22.7194							8.22306	-13.3025
	28.3096	-23.2878							8.31559	-14.1275
	28.3384	-25.5823							8.26676	-11.6659
	28.2698	-24.9197							7.5586	-9.82822
	28.2269	-24.0776							8.05878	-11.5192
	28.103	-22.7163							8.18895	-13.9053
	28.1203	-21.2313							7.85843	-11.1168
	28.1612	-21.185							7.84563	-11.3291
	28.1716	-18.5653							7.98237	-12.6243
	28.152	-17.5907							7.46673	-9.47069
	28.2264	-18.7477							7.5052	-11.4024
	28.3159	-19.5043							6.55228	-6.70836
	28.0893	-15.9869							7.10529	-12.3542
	28.3202	-16.6607							7.58415	-13.9776
	28.2012	-16.2111							6.59621	-11.0126
	28.5555	-18.3333							6.23114	-18.554
	28.3588	-19.0181							6.00233	-13.6427
	28.3884	-17.755							6.43302	-15.7485
	28.2931	-19.3745							7.12926	-17.9095
	28.2526	-17.9945							6.56533	-13.4041
	28.3575	-18.5723							6.70105	-11.4389
	28.2987	-18.2122							7.25675	-12.3267
	28.5277	-20.3612							7.64439	-15.5234
	28.56	-20.6563							8.15216	-20.329
	28.5135	-17.9475							7.97211	-17.1802
	28.3546	-17.3057							8.33365	-17.4858
	28.4074	-16.9085							8.58304	-17.5285
	28.3661	-16.5068							8.57439	-16.4968
	28.438	-17.9365							8.6975	-22.5366
	28.4979	-18.3024							8.31673	-19.8548
	28.5379	-20.4841							8.30078	-19.7064
	28.6044	-23.6233							8.67393	-22.9641
	28.4624	-21.2006							8.10416	-22.1511
	28.5444	-23.7845							7.94184	-22.6696
	28.5268	-24.9891							7.72916	-21.5604
	28.6866	-26.5402							8.07118	-24.1139
	28.6026	-27.3405							8.17606	-26.7711
	28.6269	-28.1902							8.0907	-26.9
	28.7034	-29.5723							7.67073	-24.3182
	28.9551	-32.2959							7.48056	-24.2877
	28.789	-31.1803							7.45723	-25.3194
	28.8411	-30.7076							7.18381	-22.5553
	28.9776	-31.6068							7.28873	-27.851
	29.0526	-29.1142							7.14427	-23.9297
	29.2722	-31.1883							6.98987	-23.9513
	29.1842	-31.6706							6.79138	-22.1672
	29.0864	-30.3591							6.62945	-22.8295
	29.2328	-30.5842							6.25183	-25.8744
	29.3729	-33.2004							6.00636	-27.692
	29.3758	-29.8151							17.0537	-16.9673
	29.3159	-26.9997							6.35378	-28.6797
	29.5237	-28.362							6.28767	-27.9
	29.5312	-29.9962							6.09587	-20.9725
	29.2504	-25.96							6.53529	-23.7002
	29.33	-26.8147							6.59461	-20.8092
	29.3932	-27.2094							6.9266	-23.7792
	29.3269	-25.3831							7.00009	-23.3489
	29.2314	-25.3536							6.55353	-18.8883
	29.314	-22.4244							7.17914	-23.31
	29.2957	-22.3816							7.26615	-19.5055
	29.1988	-21.9481							7.89105	-24.3889
	29.0025	-22.8603							7.95105	-23.6724
	29.1363	-22.041							7.81363	-22.1682
	29.0953	-21.4697							7.86914	-23.4297
	28.9626	-20.7191							7.7735	-23.469
	28.8012	-22.1531							7.65136	-22.6269
	28.9375	-21.9812							7.39717	-22.3179
	28.808	-20.9137							7.58132	-25.6851
	28.7247	-21.2967							7.27897	-24.9355
	28.6304	-21.8661							7.32239	-26.2886
	28.7653	-23.1231							7.10307	-26.3588
	28.7142	-22.87							7.14762	-29.6792
	28.7311	-26.8747							7.1639	-29.4669
	28.5135	-28.5428							6.98558	-30.5944
	28.8605	-29.5583							7.10224	-30.8363
	28.5429	-29.1604							6.93379	-29.784
	28.8475	-34.4809							6.84019	-30.0127
	28.7273	-35.2286							6.96555	-30.6426
	28.876	-36.1704							6.64965	-28.8896
	28.84	-36.0359							6.64147	-29.157
	28.9853	-37.7241							6.5829	-29.0788
	28.7989	-35.1999							6.47632	-27.4955
	28.7568	-40.0345							6.15136	-25.7954
	28.8237	-37.4278							6.24777	-26.2727
	28.7428	-39.4645							6.6032	-23.9242
	28.7592	-35.9046							6.48666	-18.3061
	28.6259	-32.6867							6.6851	-17.9226
	28.6271	-30.5748							6.92731	-19.8068
	28.6444	-28.8319							7.03714	-19.5695
	28.6202	-29.2025							7.18006	-18.319
	28.3745	-26.3671							7.51161	-18.4618
	28.5049	-27.1702							7.37384	-17.6574
	28.4478	-25.4359							7.51203	-17.7805
	31.5744	37.6976							7.73429	-15.9339
	31.6469	39.3576							7.95858	-15.0583
	31.5957	40.1791							7.92243	-15.2979
	31.5202	39.3006							8.18672	-13.4905
	31.6703	40.2605							8.21525	-12.318
	31.5961	39.7465							8.42595	-12.2409
	31.5777	38.0959							8.69537	-12.2633
	31.6225	37.8977							9.06183	-12.8715
	31.6021	37.5853							9.16489	-15.1554
	31.6186	38.0802							9.14176	-15.4555
	31.6221	38.445							9.0065	-18.6433
	31.6859	38.0514							8.86241	-19.9452
	31.5665	35.7878							9.007	-21.9142
	31.5738	34.8586							9.12002	-26.8278
	31.6948	35.5494							28.1479	-22.7033
	31.6866	35.0181							28.216	-23.8382
	31.672	33.1676							28.1899	-21.6371
	31.4616	27.4131							27.8762	-22.3404
	31.6825	29.6571							27.9031	-23.6182
	31.7663	29.5685							27.8377	-24.0748
	31.8461	27.9923							27.9568	-24.5347
	31.8618	27.2111							27.5204	-22.1618
	31.8909	27.3056							27.3856	-20.1229
	32.0564	26.887							27.4037	-18.105
	32.0368	25.2408							27.2044	-17.4469
	32.0735	24.0509							26.9868	-11.2089
	31.9792	21.9323							26.8423	-12.1444
	32.0969	22.5694							26.7421	-10.4839
	31.9736	20.1458							26.4908	-8.88349
	32.0249	19.9446							26.2991	-8.48034
	32.0696	19.7354							26.0993	-6.8387
	31.7984	15.5738							26.018	-6.59258
	31.9527	17.4501							25.8395	-8.75249
	32.0233	17.7149							25.6375	-7.30276
	32.0227	17.634							25.6027	-9.29038
	31.9836	17.1431							25.5603	-10.8136
	32.0823	18.8482							25.3686	-10.5319
	32.1863	21.1562							25.2103	-11.8846
	32.1594	20.7273							25.1648	-13.9193
	32.1656	21.2559							24.9968	-10.8044
	32.11	20.8699							24.9522	-12.2616
	32.0814	20.953							24.8201	-10.3613
	31.9386	19.4766							24.5924	-8.37554
	31.8857	18.5656							24.519	-9.82339
	32.2507	25.2103							24.351	-7.61061
	32.1941	25.0651							24.2489	-10.8648
	32.1343	25.0235							23.9184	-9.47329
	32.2364	26.7749							23.8595	-10.1398
	31.9844	25.6152							23.6869	-10.3951
	32.0922	27.0134							23.5112	-10.3481
	31.9314	25.5132							23.3068	-11.0593
	31.926	27.7593							23.1165	-11.2647
	31.7809	26.7274							23.0013	-9.91053
	31.8261	27.7315							22.73	-10.7403
	31.7605	29.4204							22.7321	-9.8634
	31.8709	31.5643							22.4426	-10.4119
	31.7717	31.8576							22.3776	-11.1133
	31.7742	32.3037							22.0692	-9.43083
	31.7112	33.7323							21.8574	-7.45253
	31.712	34.8779							21.6108	-5.87981
	31.7705	37.0128							21.4435	-7.67745
	31.6765	35.9133							21.0933	-5.75506
	31.618	36.4755							21.0773	-6.79564
	31.5972	36.513							20.7363	-7.19099
	31.6157	38.9315							20.4836	-6.91898
	31.7263	41.6952							20.4218	-9.59093
	31.5722	40.5189							19.9203	-7.94961
	31.4721	38.9499							19.8773	-10.9699
	31.3379	39.073							19.6148	-11.7036
	31.3465	39.3999							19.3153	-12.046
	31.3425	38.6907							19.1316	-12.6726
	31.2728	36.4559							18.9658	-15.0331
	31.1772	36.427							18.776	-15.6667
	31.1077	35.171							18.5171	-15.0565
	30.8242	32.1503							18.3167	-14.8501
	30.7322	32.1743							18.1961	-16.0834
	30.6142	31.3072							17.9725	-15.3069
	30.4598	29.8108							17.7693	-13.5851
	30.2342	28.6455							17.5399	-13.4699
	30.1936	27.8639							17.0418	-8.22262
	30.1422	24.7433							17.0567	-10.4852
	30.0703	27.0528							16.9051	-10.2754
	30.0208	24.8311							16.5119	-7.21625
	29.8451	25.0945							16.3218	-7.21374
	29.8092	23.3798							16.1753	-7.43336
	29.5679	22.76							15.9664	-5.66204
	29.6198	22.4889							15.8178	-7.84643
	29.2774	20.0188							15.5785	-6.40482
	29.1344	18.2564							15.265	-5.69855
	28.9674	16.0572							15.0574	-5.48615
	28.9126	16.8473							14.7554	-4.85454
	28.6943	12.8229							14.6507	-6.56904
	28.5708	11.5894							14.223	-5.3357
	28.4815	9.54023							14.0611	-6.31034
	28.3604	7.81237							13.5993	-4.34197
	28.2722	5.0439							13.3752	-5.30213
	28.0615	4.76292							13.36	-9.02552
	27.8765	2.52191							13.0593	-9.06445
	27.8552	0.349691							13.0539	-11.7597
	27.612	-1.60906							12.6017	-10.7335
	27.543	-2.70787							12.4668	-12.0547
	27.2484	-5.52377							12.1732	-11.5671
	27.235	-4.10568							11.9204	-10.8892
	27.3183	-6.74679							11.6207	-11.0984
	27.0785	-8.39214							11.3879	-10.8117
	26.9472	-9.5814							11.1828	-11.6709
	26.7103	-9.45619							11.0385	-12.5241
	26.8274	-10.3249							10.6269	-10.8801
	26.8645	-10.8277							10.2931	-9.45985
	26.7266	-11.7994							10.1225	-10.1005
	26.7642	-12.5186							9.90584	-10.0682
	26.7597	-14.4028							9.50705	-7.54613
	26.5899	-10.1619							9.34956	-7.99134
	26.5786	-16.2271							8.94378	-5.97199
	26.5355	-13.3639							8.89579	-8.83216
	26.3883	-15.6779							8.6349	-8.67508
	26.3654	-13.4396							8.20831	-6.85681
	26.3468	-15.3768							8.04922	-9.39316
	26.2353	-16.8675							8.01167	-12.1285
	26.2406	-16.263							7.57939	-11.1714
	26.1706	-16.0563							7.34424	-11.3598
	25.9713	-18.5591							7.10639	-12.7179
	25.9767	-16.9072							6.77894	-12.7562
	25.9093	-18.4191							6.58588	-13.8355
	25.8893	-18.5499							6.30451	-13.3747
	25.9153	-17.8513							6.15956	-14.5842
	25.8076	-20.3013							6.40656	-16.96
	25.6839	-19.5187							6.40142	-10.7807
	25.7093	-20.0323							6.69042	-14.3869
	25.7	-19.8697							6.97584	-14.9091
	25.6782	-18.6896							7.10794	-15.5353
	25.5474	-17.4751							7.38045	-15.5191
	25.4851	-17.118							7.5503	-17.1089
	25.4783	-16.9544							7.81063	-17.2025
	25.3436	-16.4742							8.08827	-18.8656
	25.3781	-17.9711							8.2787	-18.7926
	25.1951	-12.9034							8.72181	-17.9845
	25.2659	-14.6827							8.70798	-19.3047
	25.222	-14.0415							8.9533	-19.8968
	25.2308	-14.0775							9.13203	-18.2433
	25.2253	-14.1064							9.62368	-20.4569
	25.1975	-13.4793							9.85872	-19.9287
	25.1972	-14.4535							9.99175	-19.4259
	24.9665	-15.2449							10.3816	-19.5394
	25.0842	-18.9005							10.5315	-19.2993
	24.9934	-19.2681							10.502	-17.3467
	24.8548	-19.2037							10.4426	-17.0206
	24.781	-27.8638							10.3832	-15.861
	24.717	-23.2467							10.3348	-14.8169
	24.502	-23.8192							10.2308	-12.3103
	24.152	-25.4202							10.1719	-11.7369
	24.4175	-27.0239							10.1571	-12.3665
	24.1706	-27.2115							9.84465	-8.59193
	24.1534	-28.5474							9.59034	-6.40582
	24.1798	-30.0139							9.6119	-6.29131
	24.1928	-31.7824							9.3973	-5.00103
	24.202	-33.3519							9.23675	-4.45325
	23.9391	-32.1326							9.14434	-5.33192
	23.9456	-33.6637							9.0916	-6.8047
	23.8901	-33.9687							8.85557	-5.43974
	23.7891	-33.0122							8.71656	-6.24132
	23.6522	-31.9827							8.63882	-7.02597
	23.5658	-32.0121							8.46508	-7.31089
	23.5139	-30.324							8.30949	-8.7104
	23.4811	-30.8939							8.33823	-9.56023
	23.2447	-28.3687							8.19936	-11.6088
	23.3951	-31.1359							8.15928	-12.3325
	23.3576	-30.2166							7.81596	-7.59722
	23.2172	-31.5793							8.06236	-11.1617
	23.1169	-29.4386							7.94175	-11.5246
	23.0313	-29.9962							7.88118	-11.6513
	22.7728	-28.357							7.63648	-9.96391
	22.827	-29.927							7.56919	-12.6453
	22.8096	-31.9646							7.45952	-11.6743
	22.6397	-29.7954							7.43495	-13.4938
	22.5263	-30.8763							7.29389	-13.1999
	22.5256	-32.0407							7.16223	-11.9857
	22.4364	-32.0216							7.09509	-13.6877
	22.3709	-31.1808							6.94173	-12.5622
	22.0773	-29.144							6.74332	-11.0032
	22.1648	-30.7145							6.86447	-12.0735
	21.9714	-27.2975							6.72509	-10.763
	21.9163	-28.0396							6.65211	-11.1688
	21.8099	-25.7718							6.53503	-9.86504
	21.5754	-24.5493							6.51682	-9.06454
	21.5503	-23.4747							6.90727	-10.0389
	21.3876	-22.5495							7.32748	-10.746
	21.3121	-23.7024							7.62111	-9.05839
	21.1581	-23.1573							7.83037	-11.9003
	20.9829	-20.6168							8.06767	-10.575
	21.1053	-23.5128							8.38094	-12.11
	20.9207	-21.0339							8.55384	-13.1231
	20.896	-24.2131							8.92388	-15.2915
	20.7829	-24.9583							9.16573	-14.873
	20.7291	-24.8363							9.51216	-17.3925
	20.6041	-24.9097							9.66359	-16.2635
	20.6032	-25.646							10.083	-18.3154
	20.3887	-25.3277							10.2569	-16.0364
	20.3291	-25.0895							10.5819	-18.3009
	20.2602	-24.4477							10.6083	-14.7505
	20.1132	-24.0928							10.752	-13.9683
	20.1406	-24.6586							10.7599	-12.9762
	20.0056	-22.8075							10.9119	-11.8557
	19.9425	-22.3354							11.3639	-12.4282
	19.7774	-22.6921							11.3929	-10.4287
	19.7276	-21.9106							11.7907	-11.5459
	19.6296	-22.9722							11.6592	-12.7442
	19.4046	-19.3702							11.3264	-10.4372
	19.4116	-19.344							11.5945	-13.2058
	19.2104	-20.7288							11.5479	-14.6684
	19.1673	-20.073							11.8568	-18.3618
	18.9597	-19.3545							11.9252	-18.4831
	18.9516	-20.0199							11.7216	-19.433
	18.7181	-18.9636							11.7898	-20.0477
	18.7826	-20.6829							11.5856	-20.3839
	18.4792	-19.3287							11.5252	-18.9097
	18.6372	-20.2182							11.6622	-20.974
	18.278	-18.3089							11.3884	-18.6272
	18.5341	-20.1909							11.3549	-18.2268
	18.5807	-19.4053							11.0349	-16.5178
	18.2553	-18.399							10.7635	-16.3716
	18.1542	-18.1972							10.2437	-12.175
	18.3508	-15.67							10.0734	-9.08077
	18.2352	-16.4759							9.96437	-8.45429
	18.2569	-15.6004							9.85544	-7.77087
	18.1164	-13.7467							9.40331	-4.83231
	18.0243	-14.6591							9.20462	-5.35949
	17.958	-13.7404							8.81813	-1.95854
	17.6633	-11.7174							8.45709	0.597894
	17.6778	-14.6201							8.33463	-0.788958
	17.542	-15.3165							7.86381	2.07593
	17.3985	-16.9552							7.86118	-1.66105
	17.3475	-13.5862							7.59961	-1.44868
	17.5041	-17.8521							7.28905	-0.553728
	17.2191	-17.8619							7.08261	-1.62176
	17.1205	-17.6096							6.89265	-3.01243
	17.1898	-18.0508							6.75635	-4.19021
	16.9276	-16.136							6.33754	-4.5702
	16.727	-18.9084							6.16062	-5.25915
	16.7023	-18.6535							6.16187	-7.8862
	16.5329	-19.7738							6.06806	61.1888
	16.5512	-21.6168							6.15007	58.9375
	16.3258	-23.0397							6.31579	57.2084
	16.2365	-24.2253							6.39672	57.8146
	16.0955	-24.6828							6.31883	56.4509
	15.9631	-25.9968							6.2894	56.2186
	15.889	-26.5109							6.29336	55.0538
	15.9118	-30.6845							6.26408	52.957
	15.6803	-28.9584							6.2684	51.8195
	15.4665	-31.0669							6.32344	52.8495
	15.3048	-31.4757							6.38285	52.6404
	15.2095	-31.1411							6.33106	53.2281
	14.9591	-29.9788							6.29906	52.8496
	14.7367	-29.2735							6.31251	52.9896
	14.6583	-30.1467							6.34224	53.0614
	14.2246	-25.6956							6.30123	53.7788
	14.1263	-25.7276							6.29323	53.6399
	14.0571	-27.4096							6.25654	53.4918
	13.8048	-24.954							6.37084	55.8255
	13.3998	-22.0659							6.35037	53.9479
	13.2063	-21.5553							6.38984	53.9725
	12.9944	-21.6281							6.56575	54.5265
	12.668	-21.9157							6.68741	57.17
	12.6225	-23.8071							6.70234	57.884
	12.3603	-22.5111							6.76989	58.9853
	12.1175	-22.4265							6.75244	59.163
	11.9907	-22.0581							6.85395	62.2336
	11.8426	-22.5579							6.83766	59.1202
	11.6977	-22.0658							7.00198	62.2179
	11.4008	-20.495							7.03247	63.0405
	11.2261	-21.229							7.00613	62.7586
	11.1263	-20.9665							7.20065	64.5696
	10.9327	-20.7096							7.42713	64.2478
	10.8007	-21.1665							7.31062	63.6733
	10.6789	-21.1662							7.52022	66.1323
	10.4884	-21.1972							7.53501	66.4537
	10.2611	-22.156							7.53038	66.9173
	10.1449	-23.1644							7.54349	66.3802
	9.84741	-22.0575							7.57078	65.7794
	9.62625	-21.745							7.45864	62.5745
	9.60657	-22.4865							7.52644	60.7258
	9.56919	-23.9473							7.72194	62.2928
	9.43375	-24.1716							7.69479	59.9672
	9.14719	-21.4251							7.65999	57.2728
	8.93045	-20.9397							7.67184	57.59
	8.71745	-18.813							7.71293	56.7406
	8.63825	-19.6107							7.64885	55.8689
	8.40225	-18.7229							7.67459	57.457
	8.21817	-17.291							7.72156	56.5031
	7.88414	-15.8346							7.79267	55.6008
	7.67123	-14.7517							7.80225	55.9363
	7.59725	-16.762							7.79127	55.3092
	7.38402	-17.738							7.76531	54.4961
	7.27079	-19.5526							7.87506	56.0609
	6.96656	-19.3944							7.83987	55.4002
	6.81071	-19.9659							7.8307	55.6519
	6.61675	-20.4526							7.73526	56.0103
	6.37924	-20.4304							7.88572	56.735
	6.17033	-19.4213							7.84853	55.5301
	6.06744	-16.2653							7.90102	56.8289
	6.14119	-17.2194							7.94954	56.8256
	32.0099	7.35321							7.96077	56.8263
	31.81	2.40948							7.96216	56.8292
	31.8369	2.22077							7.9147	55.8867
	31.8417	1.92125							7.90788	55.8508
	31.9359	2.01358							7.90049	55.814
	31.8901	1.30315							7.89573	55.2861
	31.6845	-0.130618							7.8769	57.0832
	31.6145	-1.13093							7.85187	55.8903
	31.6312	-1.47736							7.9168	55.8239
	31.7077	-1.15011							7.91423	57.4994
	31.8377	-0.752123							7.88083	57.5057
	31.729	-3.20294							7.95744	55.9604
	31.8159	-3.72736							8.00481	56.5101
	31.9976	-2.83943							8.02218	57.2778
	31.6284	-7.43679							7.88144	57.0663
	31.9685	-2.44581							7.91736	59.541
	31.9395	-2.57726							8.0187	59.0683
	31.9508	-4.01808							8.02572	57.989
	31.8379	-5.40004							8.06176	61.0917
	31.7218	-7.25646							8.09182	60.7916
	31.5342	-8.69866							8.05488	61.791
	31.6998	-8.38016							8.21781	64.0334
	31.5888	-10.7395							8.22591	63.3116
	31.5472	-11.7271							8.20741	64.3154
	31.6809	-11.5405							8.21578	64.2534
	31.4394	-14.4617							8.22631	64.6683
	31.4961	-15.2356							8.23725	64.9803
	31.3226	-17.3643							8.22755	63.9947
	31.244	-18.3083							8.14664	60.4164
	31.1275	-19.8455							8.16579	60.8188
	31.1134	-20.6237							8.18489	61.6506
	31.2118	-19.1444							8.06922	56.3573
	31.1904	-19.0969							8.08767	57.1484
	31.0197	-21.0937							8.15549	58.5339
	31.0463	-19.8157							8.13658	57.875
	30.9589	-20.9831							8.19055	58.2161
	30.885	-20.515							8.12372	54.9017
	30.8137	-22.5783							8.08945	56.24
	30.7285	-24.493							8.09728	53.2661
	30.7343	-24.8584							8.09267	54.0668
	30.6892	-23.5621							8.11816	50.8531
	30.6599	-24.2578							7.99816	48.6738
	30.5518	-26.9019							8.01415	47.9614
	30.575	-27.2344							7.94805	46.6348
	30.5901	-24.8708							7.86816	45.8508
	30.4004	-26.3958							7.8506	45.9532
	30.4827	-27.7323							7.81427	43.3431
	30.4797	-27.0667							7.84359	42.589
	30.432	-27.4868							7.77371	42.6969
	30.4511	-28.639							7.68528	40.9828
	30.4293	-28.7522							7.65775	39.8074
	30.3067	-29.5936							7.66968	36.6794
	30.3157	-32.0654							7.59877	35.4832
	30.3608	-31.0508							7.55267	34.2085
	30.5215	-29.3524							7.55486	31.3962
	30.4072	-29.1856							7.56126	28.9263
	30.483	-27.8496							7.53474	27.1788
	30.4324	-28.7198							7.55047	22.9114
	30.6552	-26.5636							7.44158	22.9365
	30.7226	-25.9789							7.34906	22.1993
	30.7099	-26.5111							7.59207	16.602
	30.7481	-26.8794							7.34085	17.7662
	30.7554	-27.6587							7.36305	14.8379
	30.6955	-27.9498							7.33101	10.1309
	30.6692	-28.1947							7.35512	8.29267
	30.6708	-28.6202							7.10773	7.73814
	30.6346	-29.05							7.07046	5.22022
	30.8456	-28.5683							6.93794	4.10782
	30.714	-29.6035							7.14842	-0.945418
	30.7817	-29.5083							6.92217	-0.855079
	30.848	-30.443							6.83933	-2.30921
	30.8208	-30.4036							6.84013	-3.87019
	30.8374	-30.3217							6.62589	-3.86386
	30.6411	-28.868							6.80338	-7.16808
	30.6603	-30.5402							6.41728	-4.97988
	30.5039	-32.0134							6.82248	-8.76055
	30.5262	-30.5676							6.64538	-9.83294
	30.6659	-29.9957							6.65452	-9.94888
	30.4908	-32.377							6.54901	-11.4287
	30.5097	-32.176							6.56037	-10.3068
	30.4653	-32.3959							6.51366	-12.1188
	30.3945	-33.5185							6.55447	-12.7123
	30.3761	-30.8302							6.53181	-14.5974
	30.2362	-34.3454							6.46072	-14.0907
	30.186	-33.3095							6.47182	-15.4181
	30.0528	-33.9882							6.45638	-16.2573
	30.029	-32.0557							6.2751	-16.3542
	29.9636	-31.5067							6.24758	-16.7597
	29.9052	-33.2171							6.29578	-18.9562
	29.8692	-31.9933							6.36039	-20.57
	29.95	-32.5005							6.26236	-21.6742
	29.9582	-34.688							6.35335	-22.2666
	29.8761	-33.6588							6.41323	-21.8343
	29.9233	-32.1587							6.3958	-24.1378
	29.8094	-31.8521							6.3168	-23.4566
	29.7426	-30.835							6.33451	-24.0762
	29.5806	-32.1149							6.35405	-23.7566
	29.6313	-34.0787							6.23831	-24.6045
	29.3107	-34.9686							6.16904	-22.4007
	29.2522	-34.6489							6.16062	-22.7641
	29.3027	-32.5552							6.27778	-22.918
	22.5919	-35.3292							6.0962	-21.0896
	22.7265	-33.1318							6.23118	-21.7731
	22.6411	-33.7492							6.36507	-21.4843
	22.6712	-31.3616							6.32363	-20.7439
	22.3279	-32.3142							6.35796	-21.3253
	21.6395	-31.4283							6.10162	-18.5818
	21.0878	-29.2175							6.12761	-17.4933
	20.652	-26.652							6.09468	-17.5679
	20.2677	-26.3177							6.09424	-18.3435
	19.8494	-25.2223							29.0098	-34.1169
	19.6422	-20.9456							28.8502	-35.5769
	19.0359	-19.4919							28.7509	-36.8872
	18.5028	-17.3427							28.7305	-37.8648
	18.2049	-14.7945							28.3912	-37.6166
	17.6467	-14.1302							28.296	-36.9856
	17.2599	-13.3091							28.1492	-38.2098
	16.8327	-8.93338							27.9325	-37.4976
	16.5281	-4.59604							27.8112	-36.0841
	16.109	-4.24954							27.5519	-36.1358
	15.5632	-2.78955							27.6422	-36.5319
	15.3023	-2.67767							27.4408	-36.1752
	15.0123	-1.09756							27.2859	-33.8322
	14.4276	-2.71411							27.2679	-31.8232
	14.0582	-3.09539							27.0542	-31.4818
	13.7413	-2.88552							26.9629	-31.4358
	13.576	-1.38611							26.9595	-31.6863
	13.1581	-2.07904							27.0148	-32.6374
	13.0689	-1.27125							26.8241	-29.9706
	12.9883	-1.85827							26.9574	-32.9631
	12.8882	-0.897253							26.8245	-30.8165
	12.9737	-0.112481							26.7726	-33.3058
	13.0382	1.18944							26.8173	-33.2189
	13.2914	2.46361							26.5405	-34.3459
	13.2621	2.96976							26.6245	-33.1352
	13.5166	3.71232							26.3795	-31.3991
	13.6358	4.85531							26.3507	-32.4766
	13.6965	4.38011							26.2146	-31.9157
	13.8809	6.85211							26.0541	-31.2003
	13.9217	5.61112							26.0829	-32.2759
	13.9581	4.13002							26.0269	-33.2642
	14.2508	4.90434							25.85	-33.619
	14.4079	5.12428							25.8211	-32.5519
	14.3765	3.17646							25.945	-35.4745
	14.5476	2.35327							25.8678	-34.4716
	14.7609	0.760823							25.8172	-36.5737
	14.9138	0.101345							25.7859	-38.6768
	15.0169	-1.90427							25.8516	-40.0148
	15.2729	-5.06411							25.688	-38.236
	15.6209	-3.05638							25.5946	-38.6584
	15.7678	-4.073							25.5194	-38.8115
	15.8505	-7.2657							25.4272	-37.0769
	16.2039	-5.79492							25.3797	-36.0414
	16.3341	-7.44057							25.1109	-33.1863
	16.4034	-9.46857							25.1302	-32.7713
	16.6285	-9.96063							24.8026	-29.7284
	16.8809	-9.16086							24.8375	-29.5013
	16.9961	-10.8497							24.6576	-27.765
	17.0568	-13.8246							24.6321	-29.1755
	17.2543	-13.9353							24.3541	-26.9062
	17.5371	-13.0483							24.2721	-27.4143
	17.687	-13.2066							24.1531	-26.3152
	17.9256	-14.2605							24.0088	-26.446
	18.1158	-14.3296							23.7965	-25.991
	18.2458	-15.7512							23.6209	-25.9003
	18.3981	-16.8529							23.5233	-24.2064
	18.5081	-18.841							23.4717	-26.1161
	18.646	-21.0752							23.3771	-27.1842
	18.6368	-25.8211							23.003	-24.263
	19.0524	-21.8082							22.7547	-23.0937
	18.9068	-26.4863							22.7429	-25.181
	18.9692	-27.2168							22.4528	-23.4661
	19.2421	-25.0654							22.1513	-21.8699
	19.301	-24.6908							21.9519	-21.2468
	19.3756	-25.6323							21.6277	-19.6831
	19.5185	-24.0375							21.4267	-18.5531
	19.7752	-20.5897							21.3401	-19.5108
	19.7613	-22.3452							20.9627	-16.7228
	20.113	-17.31							20.8621	-16.5635
	20.2398	-16.278							20.605	-16.7022
	20.1979	-17.0673							20.5776	-19.4442
	20.5089	-12.8388							20.345	-18.4953
	20.6466	-11.1476							20.124	-18.5011
	20.7774	-9.05219							19.9463	-18.8734
	20.9244	-7.43841							19.8787	-19.6842
	21.1158	-4.64652							19.6935	-19.1606
	21.3864	-3.65088							19.6589	-20.023
	21.5948	-0.98952							19.4789	-19.1849
	21.4997	-2.48741							19.1766	-17.2116
	21.7245	-1.60866							19.0635	-18.0309
	21.6761	-3.08007							18.971	-19.55
	21.828	-3.78915							19.0271	-22.9078
	21.9912	-4.15619							18.8156	-23.2559
	22.268	-4.05557							18.7264	-27.5186
	22.1691	-7.50773							18.5453	-28.9984
	22.2013	-11.4125							18.5316	-33.4621
	22.4084	-9.68839							18.4577	-35.7789
	22.4613	-11.998							18.5077	-39.4991
	22.6532	-10.5727							18.4089	-40.3057
	22.6098	-12.2319							18.4052	-42.1409
	22.8187	-9.96025							18.2399	-41.1892
	22.8577	-12.3397							18.2396	-41.9576
	22.8305	-13.6009							18.2274	-41.6245
	23.146	-10.7771							17.9053	-36.6818
	23.0968	-12.7673							18.06	-37.6234
	23.1323	-13.9007							18.1389	-36.192
	22.9238	-17.0096							18.0653	-34.1932
	23.1807	-13.4499							17.9895	-32.1535
	23.1533	-11.9079							18.0959	-29.9666
	23.1419	-15.2765							17.9282	-28.0461
	23.0524	-14.6157							17.9164	-26.0408
	23.3338	-11.143							18.0302	-24.6218
	23.1261	-13.1026							17.7544	-22.2028
	23.0791	-9.2526							17.3582	-16.4131
	23.0166	-10.9565							17.3912	-16.9483
	22.8313	-10.4377							17.5709	-19.2679
	22.7531	-6.69588							17.1613	-16.146
	22.6897	-9.03347							17.233	-20.4871
	22.954	-5.13079							17.06	-19.7991
	22.5201	-8.74929							16.969	-20.7589
	22.8165	-6.08277							16.8554	-22.3788
	22.6364	-6.11778							16.8838	-26.104
	22.675	-6.64505							16.4467	-21.4842
	22.4706	-8.08007							16.6967	-26.854
	22.4805	-8.60363							16.4933	-24.6802
	22.3316	-7.81702							16.533	-26.5437
	22.2316	-9.03247							16.3112	-24.8217
	21.9745	-13.3216							16.0188	-22.165
	21.8462	-13.1673							15.9439	-22.2204
	21.7403	-10.3444							15.7055	-20.4782
	21.6045	-10.9348							15.495	-17.783
	21.558	-16.616							15.2334	-17.1764
	21.1688	-17.0463							14.9484	-14.6835
	21.0775	-17.2796							14.9973	-16.7864
	20.8728	-20.4787							14.7183	-16.3878
	20.6365	-18.8337							14.756	-18.762
	20.4354	-21.4961							14.7357	-21.2631
	20.2209	-21.4448							14.5314	-19.9371
	19.9314	-20.4433							14.3866	-21.5236
	19.8548	-18.6216							14.2743	-21.9095
	19.4958	-18.0045							14.2034	-23.1143
	19.1893	-18.2582							13.9603	-22.225
	19.229	-19.2577							13.716	-19.4409
	19.054	-20.5243							13.7303	-18.8908
	18.6906	-21.2718							13.5627	-18.5625
	18.6068	-22.1412							13.4563	-19.2026
	18.6128	-23.5017							13.0582	-16.0658
	18.5222	-26.781							13.0592	-17.666
	18.2651	-27.6989							12.7493	-16.2644
	17.8305	-26.9126							12.5422	-15.6045
	17.8162	-29.7078							12.3987	-16.6681
	17.61	-31.3533							12.1457	-16.9881
	17.5868	-32.993							12.0063	-18.1705
	17.5546	-33.7153							11.844	-19.5056
	17.5111	-34.8344							11.6102	-21.2551
	17.485	-35.7824							11.3688	-21.2954
	17.3168	-35.7534							11.4577	-24.5756
	17.4264	-37.6231							11.2432	-23.8923
	17.1914	-36.1845							10.9195	-20.0701
	17.3827	-37.84							10.6596	-19.2207
	17.417	-35.9289							10.5672	-18.0497
	17.3193	-39.1475							10.5018	-18.2831
	17.3381	-39.9203							10.5831	-19.3729
	17.4401	-39.5849							10.4856	-18.486
	17.3236	-40.0069							10.3244	-16.86
	17.361	-37.8243							10.1085	-14.9664
	17.3878	-39.5213							10.2345	-15.4606
	17.3673	-36.5114							9.98155	-13.0509
	17.2771	-37.6885							9.80876	-12.8183
	17.348	-35.9645							9.60262	-12.6822
	17.4461	-35.6297							9.37611	-11.971
	17.3634	-33.9889							9.08441	-11.8553
	17.346	-32.2532							9.17513	-17.0248
	17.2877	-29.1624							8.91277	-16.7627
	17.3166	-29.2942							8.67533	-16.7384
	17.363	-27.9667							8.57439	-17.5552
	17.4882	-28.1768							8.46589	-19.1737
	17.2876	-25.1086							8.3976	-19.5578
	17.5355	-25.1196							8.07212	-17.9549
	17.4087	-24.7091							7.90362	-18.757
	17.4116	-23.1633							7.56237	-15.5637
	17.1849	-23.5786							7.36353	-16.4673
	17.4019	-24.4635							7.08689	-15.1922
	17.3146	-23.8665							7.04687	-15.3027
	17.2634	-23.8731							6.78123	-13.5389
	17.2752	-22.7516							6.34162	-10.7797
	17.384	-24.2328							6.3298	-12.7256
	17.345	-24.6777							6.18677	-13.4151
	17.2534	-22.9539							16.8389	-27.6339
	17.2112	-23.652							16.6857	-28.23
	17.1979	-25.2187							16.7708	-30.1387
	17.1713	-27.0357							16.7143	-31.45
	16.9652	-25.22							16.523	-31.1642
	16.9944	-27.7378							16.4935	-31.3384
	39.9987	5.98835							16.3754	-31.0665
	39.9936	7.66949							16.4856	-34.3562
	39.9217	9.92583							16.2539	-32.5814
	39.802	8.60602							16.1974	-32.4816
	39.8023	10.2005							16.1069	-31.5556
	39.759	9.86935							15.995	-31.049
	39.2048	12.6163							15.9417	-30.8385
	39.6244	9.44							15.6142	-28.7704
	39.3488	11.6663							15.6885	-29.6636
	39.3402	11.1763							15.4974	-28.2446
	39.0519	11.4914							15.4438	-28.642
	38.8682	11.3027							15.4082	-29.0096
	38.8298	11.7181							15.4399	-29.346
	38.5957	14.1425							15.2947	-28.5015
	38.4009	14.4826							15.1638	-29.2104
	38.2975	17.0803							15.0108	-27.7191
	38.0926	15.8921							15.092	-28.9269
	37.9609	16.6665							14.9949	-28.1954
	37.9373	15.5233							14.6662	-25.0874
	37.4024	21.6461							14.7494	-25.6718
	37.2572	17.6318							14.5731	-25.2284
	37.1128	14.8434							14.3943	-23.7214
	37.2368	20.0289							14.2393	-21.8565
	36.8947	17.4253							14.1584	-20.8391
	36.6042	17.3543							14.0645	-19.9089
	36.3646	18.3946							14.0256	-19.1472
	36.6482	11.0183							13.9797	-19.212
	36.1761	12.9696							13.6656	-16.0339
	36.2827	7.25717							13.6957	-18.0117
	36.1531	3.59291							13.4003	-15.4578
	35.5463	3.22717							13.4061	-16.0438
	36.0656	-2.73528							13.1207	-13.0618
	35.3718	-0.864313							13.1236	-13.346
	35.0039	-0.78554							12.8518	-11.7613
	35.3029	-2.72519							12.8099	-11.8172
	35.1361	-4.06066							12.6138	-12.2879
	34.8362	-3.33767							12.3713	-10.1348
	34.5981	-2.69789							12.3057	-10.2118
	34.3501	-1.36976							12.1855	-10.667
	33.9729	0.0123555							12.0863	-10.4028
	34.4092	-6.06611							11.2198	13.5474
	34.06	-5.11629							11.6923	-9.98101
	33.5789	1.87593							11.5973	-10.9535
	33.2504	2.63152							11.3446	-10.9019
	32.9526	2.15919							11.1533	-10.3094
	33.219	-4.53032							11.071	-12.0221
	32.9676	-3.27309							10.7894	-10.2752
	32.9809	-4.32678							10.6672	-11.9968
	32.8242	-4.9284							10.454	-11.1579
	32.5035	-5.64776							10.447	-12.0675
	32.3289	-4.77975							10.3137	-12.0488
	32.0587	-5.10354							10.1629	-12.1574
	31.8471	-5.49368							9.78144	-8.82515
	31.2213	-1.46829							9.7247	-9.5008
	30.7739	1.95072							9.55572	-8.07459
	30.6404	0.414797							9.41601	-8.20978
	30.6401	1.65883							9.17829	-6.98894
	30.1399	3.88811							9.13787	-8.10249
	29.6979	7.83397							8.90928	-6.77418
	30.0827	4.04628							8.7748	-8.11192
	29.5947	6.27339							8.49513	-6.14296
	29.5375	8.89879							8.263	-7.16925
	29.1775	8.74092							8.14751	-8.1306
	28.8943	9.37678							7.81621	-8.74318
	28.6532	9.12893							7.49392	-9.20211
	28.8607	6.32158							7.24329	-9.95746
	28.464	6.54438							6.92277	-10.0879
	28.5233	6.40502							6.92546	-12.6232
	28.1273	9.8272							6.66063	-13.1872
	27.7746	9.828							6.4298	-13.0452
	27.7788	9.27983							6.16207	-13.6816
	27.5619	8.97169							14.7432	-2.7954
	27.3102	12.2685							14.8526	-2.37724
	27.2459	11.04							14.724	0.250421
	27.3332	8.37335							14.6604	1.51948
	26.7149	13.8845							15.0782	-3.08213
	26.7777	12.5593							15.0506	-2.2018
	26.3796	16.4002							15.0549	-2.72584
	26.6802	10.8362							14.8521	-0.560281
	26.3354	13.9905							14.7957	-0.602257
	26.0519	13.6211							14.8775	-1.69865
	26.0057	14.3308							15.0807	-2.16969
	26.0498	11.9897							14.8104	1.22424
	25.6503	14.2554							14.9782	-3.06317
	25.4979	12.2045							14.9583	-2.11564
	25.8143	6.61376							15.2871	-5.45572
	25.0712	10.0178							14.9043	-4.23105
	25.2664	6.29087							14.8908	-4.83796
	24.9182	7.19218							15.0286	-6.55403
	24.6215	5.90048							15.059	-7.83693
	24.5859	3.03026							14.9233	-8.07242
	24.1668	3.75259							14.7268	-6.69851
	24.0973	2.24187							14.5777	-6.32345
	24.5274	-3.4784							15.016	-9.73562
	24.1435	-2.76784							14.8334	-10.1533
	23.9896	-4.30266							14.99	-15.4011
	23.6758	-4.98324							14.8196	-12.5528
	23.5672	-3.94193							14.9054	-15.2287
	23.3361	-4.40807							14.7538	-15.7458
	23.2279	-5.00031							14.4002	-12.9308
	22.8469	-1.35018							14.6108	-15.2216
	22.6587	-2.06613							14.4787	-16.4221
	22.1643	1.17675							14.6534	-18.4702
	22.3667	-0.766622							14.1211	-12.5706
	22.0405	-1.24291							14.3146	-15.6065
	22.1572	-2.36327							14.3922	-16.2834
	21.7754	-0.235917							14.0179	-15.1833
	21.9549	-2.15008							14.111	-15.0905
	21.407	3.95598							14.1312	-15.504
	21.1409	7.98436							13.965	-16.9888
	21.1392	9.22722							14.026	-17.2147
	20.6975	12.1384							13.7274	-12.4564
	20.5539	14.2771							14.0207	-16.7465
	20.5849	12.8164							13.669	-14.7753
	20.8081	10.5605							13.5894	-12.64
	20.9608	7.88414							13.6272	-12.4889
	20.827	9.77322							13.658	-14.4208
	20.2593	12.4545							13.6576	-13.9351
	20.4572	10.0505							13.9836	-18.9094
	20.2767	12.8897							13.999	-17.4402
	20.4728	10.3213							13.5237	-14.6242
	20.0733	15.8539							13.72	-17.165
	20.19	14.7198							13.5842	-15.6302
	20.2153	14.1752							13.5182	-16.4003
	20.3278	17.437							13.6895	-17.2909
	20.2106	18.2579							13.1799	-12.9
	20.2886	17.7391							13.1332	-13.2226
	20.1116	22.6584							13.4569	-17.7697
	19.95	22.2866							13.4006	-17.8765
	19.9986	24.9799							12.8616	-12.4484
	20.0839	23.3653							13.0707	-16.5842
	19.9772	26.191							13.1147	-18.0041
	19.9057	28.926							12.7363	-14.3422
	19.9398	25.7402							12.4541	-11.4276
	19.6329	29.5292							12.5973	-16.6097
	19.652	29.2538							12.1493	-10.924
	19.8255	28.0796							12.1086	-12.3594
	19.8801	31.0621							12.0161	-11.7799
	19.8476	27.3177							11.7799	-10.7658
	19.6613	27.4084							12.1655	-17.3247
	19.6547	27.0185							11.6858	-10.7704
	19.6376	26.252							11.788	-12.5611
	19.8053	26.3056							11.6424	-14.1865
	19.4172	31.8181							11.7925	-17.2197
	19.347	28.5913							11.3986	-13.584
	19.622	31.1055							11.4961	-16.7878
	19.4011	33.1892							10.8604	-9.82971
	19.2882	36.0459							11.2105	-15.1933
	19.514	35.6853							10.9557	-15.1865
	19.3513	38.3045							10.6981	-12.3626
	19.273	40.4006							10.9277	-16.8274
	19.3511	38.3193							10.3856	-10.6787
	19.2647	39.307							10.3775	-12.6799
	19.1962	39.2816							10.2142	-12.7806
	18.9124	38.6734							10.1882	-12.5664
	19.0934	38.1685							10.082	-13.7121
	19.1209	36.7241							10.0694	-13.4809
	18.9484	33.7678							9.64449	-10.7713
	18.9131	30.9748							9.92973	-15.3345
	18.6655	29.8365							9.66079	-12.9496
	18.6957	29.0676							9.44201	-11.7361
	18.6351	25.6466							9.57522	-16.0221
	18.6572	22.8239							9.33273	-14.135
	18.7528	21.7215							9.17691	-13.715
	18.6985	21.3015							8.97099	-12.5317
	18.6592	19.735							9.08924	-15.5393
	18.7135	16.1251							8.82085	-13.87
	18.4398	18.8039							8.50042	-11.8891
	18.6322	14.9912							8.64592	-15.5609
	18.4998	14.6549							8.60947	-15.2172
	18.1781	14.9935							8.42038	-15.1503
	18.187	13.403							8.42624	-15.9359
	18.9117	9.44845							8.33235	-14.4391
	19.0608	14.4296							8.19799	-15.3463
	19.809	7.24044							8.05866	-14.3494
	20.4433	6.96863							8.33337	-18.0302
	20.6303	7.85799							7.92907	-11.6409
	21.2717	8.86647							8.06179	-14.7665
	21.9515	6.70582							8.31788	-17.0967
	22.6106	7.2923							7.82528	-13.1478
	23.1827	5.1014							7.75706	-11.1074
	23.7493	4.74852							7.65278	-9.93104
	24.1324	7.63093							7.80493	-14.0992
	25.3871	0.982723							7.40805	-9.51888
	25.7706	2.95549							7.52702	-10.5626
	26.2573	3.08449							7.47925	-9.51869
	26.8307	2.64443							7.30791	-7.3353
	26.8751	5.9211							7.45951	-11.217
	27.7951	5.13527							7.43448	-10.8895
	28.4351	5.63955							7.47895	-11.7831
	29.0064	4.63511							7.09634	-7.67455
	29.6096	4.57583							7.2302	-10.0271
	29.6711	6.71827							6.96221	-8.59446
	29.5786	7.46859							7.06585	-10.2402
	29.7132	5.74814							7.20125	-14.7373
	29.589	5.63415							6.97325	-10.7992
	29.0544	9.83758							6.74964	-10.1786
	29.1425	8.09535							7.17787	-16.3528
	29.2272	4.76162							6.64105	-11.2447
	28.7713	7.35448							6.86358	-12.9476
	28.5676	7.65962							6.64616	-11.5712
	28.7078	6.1936							6.56565	-11.2193
	28.3446	7.63792							6.51803	-10.3483
	28.3906	6.43315							6.64879	-13.1561
	28.1164	8.0043							6.56185	-12.0876
	27.652	9.60056							6.46798	-10.0095
	27.8169	10.4528							6.32575	-10.4292
	27.5298	13.3071							6.2742	-8.73942
	27.8582	9.78888							6.4732	-13.1545
	27.6093	10.6791							6.22076	-9.46943
	26.932	16.5478							6.04798	-6.70609
	26.7961	16.8828							6.11691	-9.91921
	27.08	14.3241							30.1954	-6.627
	27.1193	13.4382							30.0133	-5.90025
	26.8532	15.8231							29.9655	-7.03819
	26.2889	17.2503							29.7184	-4.53863
	25.7196	17.5381							29.4328	-5.06392
	25.4032	17.0951							29.3546	-5.78762
	25.0204	18.4517							29.3565	-8.72204
	25.1935	16.0318							29.1326	-10.3506
	25.123	17.4368							28.8318	-9.22969
	25.0126	13.5502							28.8495	-13.6617
	24.7849	15.7133							28.808	-18.0516
	24.5919	13.3449							28.4606	-15.5124
	24.1484	16.1156							28.3516	-18.3777
	24.4089	12.7425							28.2047	-19.7099
	23.9925	12.1413							27.7012	-16.6232
	23.7566	11.5648							27.6715	-18.4727
	23.7126	11.4828							27.5501	-19.2075
	23.2539	13.168							27.62	-23.8849
	23.0306	13.1701							27.38	-23.6438
	23.023	12.6529							26.9092	-19.8791
	22.6839	14.3538							26.5348	-19.6808
	22.5651	12.4438							26.4604	-22.3311
	22.4333	13.1268							26.3912	-23.3307
	22.5083	13.6017							26.104	-23.0376
	22.137	15.1838							25.8923	-20.5622
	22.1175	14.9893							26.0502	-25.8617
	22.1583	14.5619							25.2938	-20.6238
	22.3522	12.0326							25.3042	-21.8881
	22.384	11.2509							24.9952	-20.2821
	22.2842	13.6779							24.7809	-19.8235
	22.0747	11.6941							24.7771	-21.809
	21.8397	11.6404							24.41	-19.3038
	22.0251	9.39535							24.3515	-21.2158
	21.8842	9.96284							23.9402	-17.7566
	21.9347	9.91559							24.0203	-20.7815
	21.8339	10.6265							23.456	-15.0544
	21.7224	11.1909							23.3566	-17.1171
	21.7773	10.5993							23.3476	-18.3126
	21.7998	10.0289							23.2274	-21.482
	21.8321	13.2104							22.9244	-18.8549
	21.7868	13.1118							22.6537	-18.9243
	21.7481	12.7663							22.4893	-18.3088
	21.884	9.69129							22.6221	-21.8373
	21.8573	9.54451							22.3508	-20.4699
	21.7449	12.1474							22.1015	-18.5613
	21.5342	9.78749							21.8856	-17.4536
	21.459	8.02857							21.8716	-20.607
	21.4975	7.5941							21.6879	-20.3236
	21.7073	4.39907							21.3581	-19.5213
	21.6996	3.05992							21.4592	-22.7097
	21.3922	4.39649							21.3406	-24.3304
	21.092	5.89382							21.012	-21.8612
	21.048	5.76627							20.1352	-11.0176
	21.1316	2.67051							20.6851	-23.2541
	21.3497	-1.0559							20.1485	-19.6902
	21.3501	0.471063							20.0622	-20.0619
	21.4253	-1.53646							19.8114	-19.7985
	21.3773	-1.99136							19.514	-19.0821
	20.9349	-0.065984							19.4043	-19.6911
	21.0647	-0.800566							18.7585	-15.2903
	21.1279	-4.60007							18.3472	-14.7452
	21.1404	-3.64986							18.4796	-19.8316
	21.1948	-5.12072							18.1943	-17.8877
	20.7477	-2.21593							17.7567	-16.7302
	20.9636	-5.15764							17.6704	-18.6845
	20.9489	-5.15876							17.379	-17.3865
	20.8306	-4.23775							16.9738	-15.2237
	20.8041	-3.0219							16.7243	-15.4425
	20.3891	0.26268							16.2746	-15.9002
	20.4359	-0.156739							16.105	-16.9285
	20.5845	-0.706936							15.6558	-14.5274
	20.5091	-3.38838							15.4555	-12.7871
	20.3439	-0.441215							15.2677	-15.1601
	20.2905	1.42186							15.1069	-16.8726
	20.088	2.17997							14.4922	-13.5751
	20.2106	1.58996							14.412	-16.7287
	19.6055	4.59858							13.9838	-13.0913
	19.7314	2.13924							13.8553	-14.8412
	19.9734	0.0555372							13.6395	-16.9809
	19.6488	2.30885							13.4811	-18.012
	19.1351	4.62546							13.0654	-14.2966
	19.2997	4.94165							13.1065	-18.6258
	19.3489	1.85536							12.9033	-18.8581
	19.4096	2.28304							12.4983	-13.5345
	19.1632	2.30829							12.5093	-19.5381
	19.1816	1.02934							12.5929	-21.298
	19.0019	1.34784							12.1113	-18.2399
	19.2412	-2.82019							11.9832	-17.439
	18.9974	-1.67478							11.6814	-14.8466
	18.4001	2.90002							11.6261	-15.2622
	18.5926	-0.283491							11.3799	-15.1092
	18.6936	-2.71178							11.1875	-16.5942
	18.4615	-2.83865							10.9817	-16.1697
	18.3229	-2.52663							10.8563	-15.2176
	18.0014	-1.85351							10.5006	-14.7196
	18.056	-3.75368							10.3359	-15.1027
	17.6531	-1.7575							9.96586	-13.6198
	17.7763	-3.28326							9.93058	-14.6989
	17.5791	-3.24276							9.64879	-13.2796
	17.6108	-4.59747							9.52707	-13.7608
	17.4795	-4.77469							9.19815	-11.1784
	17.3069	-4.32865							9.04368	-13.1224
	17.4946	-6.91199							9.0143	-15.3184
	17.0036	-2.82727							8.70847	-13.7702
	17.0533	-4.99286							8.42756	-11.1487
	16.901	-3.11952							8.43179	-13.1511
	16.6897	-2.9817							8.31781	-13.1322
	17.1471	-9.0389							8.13514	-14.7211
	16.8524	-9.40123							7.94126	-14.0209
	16.6697	-6.44651							7.82248	-14.2371
	16.6963	-5.60948							8.01289	-19.5469
	16.8957	-10.2084							7.77394	-16.2864
	16.6265	-8.15476							7.55287	-17.3504
	16.3571	-7.0029							7.5792	-19.3076
	16.638	-10.549							7.16908	-15.8361
	16.5201	-8.11292							7.14721	-17.4759
	16.3382	-8.47561							6.89508	-16.6193
	16.3489	-10.1127							6.96546	-18.5323
	16.3163	-9.75266							6.6289	-17.0552
	16.3512	-8.60247							6.55723	-16.6958
	16.1998	-7.46964							6.50964	-17.703
	16.2609	-10.1054							6.3879	-18.1098
	16.3268	-10.0092							6.07531	-15.7558
	16.3436	-9.88307							6.15068	-17.8708
	16.3429	-9.9028							29.559	-32.6078
	16.0452	-6.7391							29.2029	-29.0581
	16.1427	-9.97562							29.1505	-30.709
	15.9741	-8.57352							29.2116	-31.3249
	15.8749	-7.26443							28.728	-26.5727
	15.7037	-6.65317							28.6979	-28.2068
	15.7659	-8.44937							28.6409	-30.0207
	15.7731	-7.52378							28.4585	-28.1808
	15.6885	-7.20462							28.3591	-29.7224
	15.6846	-7.43066							28.0566	-28.4731
	15.5722	-5.45393							27.7719	-26.2599
	15.4189	-4.45266							27.6954	-26.0198
	15.369	-4.37834							27.6186	-26.9982
	15.5148	-7.77216							27.2118	-22.955
	15.3877	-5.48323							27.2158	-24.7522
	15.3027	-4.80628							26.8734	-23.7746
	15.3485	-6.05605							26.6838	-23.6321
	15.2977	-7.21785							26.3867	-20.9536
	15.1761	-5.92643							26.1046	-21.3838
	15.2102	-6.47682							25.8516	-19.9836
	15.3435	-8.59399							25.8985	-23.5277
	15.247	-8.3479							25.6465	-22.391
	15.1283	-6.9164							25.391	-21.6341
	15.076	-6.48421							25.1663	-22.823
	14.8887	-6.6042							24.8708	-22.8271
	14.9163	-6.48854							24.627	-22.6406
	14.9353	-7.26303							24.3664	-22.6294
	15.012	-7.01512							24.3178	-23.6221
	14.8821	-4.7107							24.2047	-24.3828
	36.1949	14.3166							23.9007	-23.6946
	36.1544	16.1393							23.5437	-22.2151
	35.9065	13.4071							23.3047	-22.7955
	36.201	16.9919							23.245	-23.1782
	36.0818	16.1106							23.3001	-25.9899
	35.7016	14.5186							23.2042	-26.6328
	35.6041	11.5917							22.9226	-26.8842
	35.4405	12.0011							22.8025	-27.7019
	35.6638	14.9201							22.6582	-28.0414
	35.5356	14.6814							22.4269	-28.3424
	35.1352	10.9902							22.414	-31.3373
	35.4485	16.7177							22.0857	-28.3711
	35.4484	18.4727							22.0332	-29.3167
	35.4533	18.9529							21.7295	-27.1198
	35.4293	26.3793							21.7174	-29.8174
	35.4106	22.6687							21.705	-30.0596
	35.4022	22.2307							21.3527	-27.6978
	35.3108	22.9333							21.2785	-30.9606
	35.215	24.007							21.3835	-30.3641
	35.3209	26.0989							21.2564	-30.415
	35.3375	25.1146							21.1745	-31.4589
	35.0973	22.8313							20.9187	-28.2142
	35.0804	22.8676							20.9347	-32.4756
	35.0457	19.79							20.8134	-28.4443
	35.0589	20.2131							20.8046	-29.749
	34.9524	19.1123							20.6998	-27.6653
	34.8773	15.8652							20.4464	-27.7617
	34.4494	11.3819							20.4717	-27.256
	34.8024	12.4313							20.4274	-29.5363
	34.3246	5.9168							20.16	-27.7212
	34.2367	4.26457							19.9292	-25.1628
	34.3375	0.91526							19.4882	-21.6325
	34.0458	0.567585							19.7365	-26.037
	34.011	-4.1886							19.1945	-21.7561
	33.8619	-1.19854							19.6028	-26.9535
	33.8403	-7.67564							19.2551	-25.4901
	33.7495	-13.0409							19.1397	-24.2289
	33.5261	-10.5877							18.5496	-20.3734
	33.2015	-14.8708							19.023	-27.9711
	33.3543	-14.8437							18.6004	-24.3239
	32.9713	-16.5471							18.3496	-23.0212
	33.1745	-17.0021							18.2011	-22.6526
	33.0456	-16.4281							18.0466	-22.3954
	32.7721	-13.0848							17.9497	-23.8707
	32.8239	-14.4267							17.7636	-23.433
	32.7505	-17.7173							17.8439	-26.4838
	32.8303	-20.2249							17.3522	-23.2305
	32.4343	-21.3919							17.0947	-22.2125
	32.4755	-26.5761							17.0774	-24.1256
	32.5014	-17.6364							16.8954	-24.1724
	32.3731	-23.1356							16.5225	-24.157
	32.2341	-19.5104							16.3411	-26.7174
	32.3545	-23.2818							16.2182	-27.9161
	32.1399	-25.7118							16.0711	-27.6397
	32.0981	-24.2325							15.8556	-27.0803
	32.3833	-28.889							15.8489	-30.4927
	32.16	-28.0698							15.7322	-29.6951
	32.0979	-26.966							15.6582	-31.8195
	32.0996	-26.3374							15.5261	-29.6739
	32.3946	-27.8019							15.3592	-30.1747
	32.1647	-27.8376							15.1099	-28.2984
	32.138	-25.9156							15.2253	-32.2555
	32.3469	-26.938							15.2392	-32.4286
	32.5145	-26.5915							14.848	-28.6483
	32.4381	-18.6064							14.8383	-30.2738
	32.2279	-26.134							14.7864	-32.0685
	32.2641	-23.7586							14.5565	-30.6144
	32.334	-18.7937							14.3987	-27.9133
	32.3518	-21.6701							14.1456	-27.3146
	32.6109	-19.4262							14.1635	-29.1066
	32.3517	-19.9824							14.0962	-28.3264
	32.4199	-17.5695							13.8615	-26.6841
	32.5553	-18.8153							13.6131	-26.7676
	32.332	-20.3714							13.5148	-24.2816
	32.2325	-21.2876							13.2182	-22.9528
	32.3641	-22.3272							13.0962	-22.3024
	32.4051	-23.0773							12.758	-19.7174
	32.2959	-22.8997							12.8603	-21.3308
	32.5201	-24.283							12.6589	-19.9338
	32.6624	-20.1593							12.3985	-20.138
	32.518	-20.7175							12.0793	-18.3519
	32.8268	-19.8111							12.1157	-20.8257
	32.8027	-18.6793							11.8471	-20.7749
	32.7199	-18.7446							11.7205	-21.3163
	33.0072	-18.687							11.6658	-23.5121
	32.8308	-21.0586							11.74	-23.8895
	33.0479	-18.4261							11.424	-22.5393
	33.2005	-16.1702							11.5295	-26.2626
	33.0527	-14.9752							11.1106	-24.562
	33.2929	-16.609							10.9654	-22.6612
	33.451	-11.577							10.8733	-22.4326
	33.3012	-13.4845							10.7357	-21.8551
	33.731	-10.3816							10.7758	-21.9025
	33.4669	-11.1214							10.4177	-20.1548
	33.5559	-7.97969							10.4614	-22.4489
	33.7086	-11.7888							10.2634	-19.8983
	33.5489	-9.79232							10.0279	-21.9325
	33.8971	-11.8285							9.81677	-18.5678
	33.9194	-9.04459							9.83952	-20.3477
	34.0197	-12.2714							9.74887	-22.5622
	34.0036	-10.5987							9.37202	-19.2005
	34.3656	-11.0522							9.45458	-22.7303
	34.3552	-7.69961							9.42032	-24.3393
	34.4886	-9.90125							9.31881	-25.0338
	34.6312	-11.0467							9.1073	-24.3622
	34.4697	-11.4028							9.27057	-25.3615
	34.949	-10.4855							9.02398	-25.0508
	34.8547	-10.3166							8.80573	-25.0435
	34.983	-10.5343							8.90055	-26.5144
	35.0496	-10.907							8.75898	-24.8782
	35.0606	-13.1747							8.63679	-25.4427
	35.1051	-10.1049							8.30951	-26.6337
	35.3366	-9.70743							8.40666	-27.2839
	35.192	-12.7409							8.19231	-24.2665
	35.3033	-12.9678							7.95631	-23.7633
	35.2288	-10.0223							7.94802	-24.8947
	35.2935	-12.5109							7.8828	-24.399
	35.372	-11.1473							7.42391	-22.0219
	35.4723	-9.87831							7.36824	-21.1205
	35.4337	-11.5773							7.17062	-20.137
	35.6231	-7.84835							6.92874	-20.2098
	35.8455	-7.07524							6.93574	-21.5233
	35.8102	-8.54625							6.80093	-19.9662
	35.7393	-9.15209							6.41059	-16.5502
	35.8694	-10.089							6.32651	-19.0881
	35.9535	-12.6295							6.14009	-16.591
	35.8471	-12.2564							6.02249	-18.4555
	35.9447	-13.841							6.04246	-21.869
	35.9546	-13.3785							16.7274	-23.4391
	36.0225	-13.562							16.7282	-22.5466
	36.2184	-13.0357							16.7561	-25.5191
	36.1069	-15.2239							16.548	-23.7514
	36.2019	-15.9993							16.6146	-23.045
	36.2754	-16.7129							16.5204	-22.4135
	36.4404	-14.1849							16.1707	-20.3073
	36.4368	-15.1476							16.2719	-22.9822
	36.6742	-13.0671							15.9258	-19.1551
	36.4009	-20.3189							16.049	-23.3128
	36.7102	-12.6807							15.5786	-22.699
	36.6914	-14.8237							15.3336	-18.6791
	36.9673	-12.4683							15.5038	-19.739
	36.804	-15.6023							15.1386	-17.0128
	36.9026	-11.877							15.1639	-20.6071
	37.0692	-11.2594							14.758	-15.7521
	37.323	-12.0495							14.8319	-20.3471
	37.3108	-11.2073							14.9327	-21.7561
	37.4665	-11.4893							14.7103	-21.3195
	37.4746	-13.3584							14.6363	-20.3943
	37.6951	-9.53307							14.5338	-20.4577
	37.7552	-10.3672							14.7549	-23.3479
	37.8355	-11.2469							14.6623	-21.7008
	38.0554	-10.9083							14.5273	-20.8908
	37.9118	-10.1985							14.3589	-20.2394
	38.1199	-13.449							14.2029	-18.7445
	38.3491	-10.2161							14	-15.5392
	38.6245	-8.74814							14.0428	-16.1359
	38.5085	-11.326							13.9212	-16.1815
	38.7293	-9.90906							13.8537	-15.925
	38.8479	-10.0237							13.6971	-16.4127
	38.8647	-9.12864							13.4737	-15.4348
	39.1305	-7.13386							13.5216	-15.4369
	39.1655	-5.43287							13.3572	-15.8771
	39.2393	-8.42469							13.0165	-13.3385
	39.4489	-4.11235							12.7918	-12.405
	39.4911	-3.33146							12.6002	-11.607
	39.5694	-5.30686							12.6218	-13.7213
	39.4629	-5.99022							12.362	-12.2893
	39.742	-0.686311							12.2029	-12.7314
	39.8971	-3.45106							12.0901	-13.412
	39.7554	-6.40931							11.9883	-14.4696
	39.8943	-6.28608							11.8706	-15.1858
	39.9655	-5.55256							11.6787	-14.9651
	39.9589	-19.91							11.4542	-13.1969
	39.3387	-13.9817							11.2557	-13.3521
	39.4837	-20.2231							11.0916	-14.8943
	39.4893	-22.8892							11.1147	-17.2416
	39.255	-22.9472							11.0079	-17.7215
	39.2549	-24.9854							10.812	-17.4861
	38.9003	-24.4947							10.6773	-18.2567
	38.8383	-26.7293							10.3294	-15.6988
	38.8672	-29.2809							10.2156	-17.0489
	38.4546	-25.224							10.1833	-19.1609
	38.0863	-24.0224							9.96514	-18.3972
	38.0335	-25.4304							9.89787	-18.4983
	37.9195	-24.8031							9.4773	-14.9376
	37.6964	-23.8012							9.22098	-13.8816
	37.2361	-19.2413							9.12104	-15.0687
	37.1936	-20.7835							8.99667	-14.6808
	37.0596	-21.04							8.85965	-18.9224
	36.8574	-20.1146							8.68485	-17.6986
	36.6011	-18.9092							8.35157	-13.8181
	36.4331	-18.9931							8.12821	-15.5954
[truncated: 1,766 more rows]

## Sheet: 5C
Non-Tracking	Trajectory 1		Trajectory 2		Trajectory 3		Trajectory 4		Trajectory 5		Trajectory 6		Trajectory 7		Trajectory 8		Trajectory 9		Trajectory 10		Trajectory 11		Trajectory 12		Trajectory 13
	X (cm)	Y (cm)	X (cm)	Y (cm)	X (cm)	Y (cm)	X (cm)	Y (cm)	X (cm)	Y (cm)	X (cm)	Y (cm)	X (cm)	Y (cm)	X (cm)	Y (cm)	X (cm)	Y (cm)	X (cm)	Y (cm)	X (cm)	Y (cm)	X (cm)	Y (cm)	X (cm)	Y (cm)
	-39.5636	1.12075e-14	-39.5009	2.41873e-15	-39.5124	2.41943e-15	-39.4921	2.41819e-15	-39.7642	2.43486e-15	-39.4871	-6.35001e-15	-39.5469	2.42155e-15	-39.5584	2.42225e-15	-39.5136	-6.35427e-15	-39.5116	2.41939e-15	-38.8841	2.38097e-15	-39.7791	2.43576e-15	-39.505	2.41898e-15
	-39.4248	-0.0335547	-39.2424	-0.128174	-39.3976	-0.19512	-39.2974	0.108701	-39.4631	-0.140522	-39.2584	0.291889	-39.2249	0.0117347	-39.4018	-0.130871	-39.2161	0.250077	-39.306	0.0375064	-38.6327	0.116171	-39.4691	-0.00871188	-39.3071	-0.0347125
	-39.4046	-0.0192066	-39.0171	-0.0479019	-38.9893	-0.258378	-39.1238	0.435643	-39.4656	0.0774692	-39.075	0.238379	-39.0448	0.226456	-39.2133	0.00441436	-39.2593	0.0273823	-38.8876	0.098771	-38.5169	0.366658	-39.3472	-0.108217	-39.2612	-0.0708789
	-39.1606	0.0056818	-38.7621	-0.154628	-38.8708	-0.341356	-39.025	0.593932	-39.2314	-0.224579	-39.0529	0.145776	-38.8901	0.0447353	-39.1867	-0.0309341	-38.8975	0.0218177	-38.9	0.222893	-38.3952	0.263946	-39.0086	-0.120731	-39.0325	0.163601
	-39.0991	-0.017123	-38.4866	-0.321586	-38.4213	-0.14877	-38.9354	0.809613	-39.2306	-0.206827	-38.9924	0.579287	-38.599	-0.261609	-38.8893	-0.102215	-38.7614	0.193771	-38.5046	0.250982	-38.1759	0.348341	-38.9383	-0.0990852	-38.9529	0.243222
	-39.148	-0.0605157	-38.3549	-0.394382	-38.3924	-0.242843	-38.794	0.897434	-39.16	0.124947	-38.7831	0.565978	-38.5007	-0.131134	-38.8029	-0.0231209	-38.6662	0.184661	-38.2811	0.453456	-38.1184	0.319786	-38.7142	-0.230549	-38.8853	0.355157
	-38.8703	-0.0431169	-37.9758	-0.33614	-38.2198	-0.0405603	-38.7126	1.05584	-38.9741	0.0393024	-38.7605	0.649898	-38.2035	-0.32089	-38.4025	0.145207	-38.2393	0.20903	-38.1092	0.526624	-37.9684	0.555009	-38.4962	-0.239074	-38.6076	0.514646
	-38.6987	0.029199	-37.7834	-0.265118	-37.9658	-0.402758	-38.6721	1.41499	-38.8406	-0.168741	-38.7042	0.665038	-37.9643	-0.585447	-38.1848	-0.0269941	-38.3424	0.251016	-37.8109	0.713077	-37.9051	0.426678	-38.3043	-0.264524	-38.3369	0.455104
	-38.7739	-0.0797178	-37.3749	-0.164512	-37.5971	-0.468462	-38.4645	1.62121	-38.7002	-0.153601	-38.2873	-0.288974	-37.7107	-0.531625	-38.1165	0.250159	-38.3135	0.250955	-37.7539	0.609205	-37.8715	0.639838	-38.379	-0.292386	-38.2528	0.694813
	-38.4994	-0.0306027	-37.2086	-0.293251	-37.3308	-0.323003	-38.4413	1.63584	-38.6636	0.0275034	-38.2879	0.541432	-37.5768	-0.632037	-37.7984	0.168391	-37.9698	0.338892	-37.5034	0.975158	-37.6614	0.853681	-37.922	-0.42307	-38.1598	0.706339
	-38.3899	-0.026152	-37.0048	-0.295182	-37.1469	-0.185601	-38.4207	1.93043	-38.3539	-0.104983	-38.5577	0.932262	-37.0642	-0.697999	-37.6536	0.0639489	-37.9261	0.442977	-37.1938	1.04223	-37.4839	0.932983	-37.944	-0.289135	-38.0495	0.865464
	-38.43	0.0761961	-36.6151	-0.331375	-36.7031	-0.500473	-38.2294	2.08941	-38.4175	0.0286474	-38.0346	0.467663	-36.8088	-1.03729	-37.5129	0.234465	-37.5932	0.483036	-36.9506	1.132	-37.3234	0.98026	-37.8418	-0.515217	-38.0252	1.14259
	-38.2494	0.158753	-36.5624	-0.284943	-36.2242	-0.611229	-38.1738	2.14917	-38.3543	-0.162681	-37.8938	0.545788	-36.623	-1.17044	-37.3766	-0.00221351	-37.4057	0.573764	-36.7396	1.23369	-37.1059	0.900299	-37.5385	-0.642849	-37.7592	1.25152
	-38.2429	0.29105	-36.281	-0.244996	-36.5665	-0.244547	-38.0698	2.2876	-38.1057	-0.257247	-37.8716	0.607089	-36.3842	-1.3681	-37.2357	0.205598	-37.3517	0.618093	-36.5468	1.41932	-36.9587	0.981759	-37.3199	-0.496725	-37.3966	1.1175
	-37.9088	0.385982	-36.1135	-0.0719442	-36.4003	-0.303366	-37.7796	2.49174	-38.3383	-0.063596	-37.4796	0.57949	-36.1014	-1.42374	-36.9763	0.335887	-37.1216	0.681796	-36.2847	1.42977	-36.8191	0.962101	-36.9457	-0.426177	-37.1971	0.97115
	-37.8232	0.492584	-35.9073	-0.0344002	-36.078	-0.570005	-37.8207	2.52833	-37.9056	0.152975	-37.5234	0.744111	-35.8757	-1.70736	-36.5959	0.12143	-37.1649	0.675768	-36.0875	1.56006	-36.7379	1.20906	-37.0268	-0.7169	-36.9054	1.32309
	-37.8121	0.509821	-35.5171	0.00132703	-35.9113	-0.507728	-37.5879	2.68988	-37.9639	0.0897444	-37.5713	0.702898	-35.5466	-1.72461	-36.6172	0.299687	-37.0344	0.851641	-35.7223	1.7385	-36.6946	1.23536	-36.777	-0.986812	-36.9855	1.27332
	-37.7972	0.308063	-35.5277	-0.147069	-35.6848	-0.647491	-37.6059	2.91263	-37.7809	-0.00503735	-37.4234	0.492697	-35.2795	-1.82979	-36.1824	0.424056	-36.6173	0.850986	-35.5926	1.75246	-36.3632	1.28533	-36.5417	-1.05814	-36.7821	1.37509
	-37.9174	0.327746	-35.3477	-0.0119035	-35.8321	-0.270813	-37.3691	3.228	-37.8317	-0.0583135	-37.4047	0.949344	-34.9907	-2.06643	-36.1337	0.269662	-36.509	1.00988	-35.2949	1.83389	-36.1035	1.61842	-36.4177	-0.805499	-36.6474	1.41342
	-37.9985	0.389528	-35.0543	0.18577	-35.8552	-0.120837	-37.2699	3.288	-37.5247	-0.00209476	-37.1487	0.982292	-34.7562	-2.16461	-35.7966	0.621074	-36.2397	0.986757	-35.1316	1.88736	-36.1168	1.4991	-36.5293	-0.741531	-36.4301	1.38544
	-37.5024	0.385915	-34.7026	0.0578421	-35.3144	-0.731662	-37.3186	3.51959	-37.4336	-0.0243465	-37.0346	0.980382	-34.5203	-2.46652	-35.6387	0.350369	-35.9554	0.96566	-34.8066	2.08432	-35.8709	1.69679	-36.2994	-0.780548	-36.1075	1.49491
	-37.5062	0.33897	-34.3949	0.228997	-35.437	-0.676819	-37.131	3.52475	-37.3417	0.00158293	-36.8828	0.94916	-34.2938	-2.54513	-35.3871	0.417289	-35.9802	1.07675	-34.6361	2.16483	-35.5921	1.66252	-35.8623	-1.50729	-35.8365	1.5429
	-37.3174	0.355727	-34.0634	0.130038	-35.0451	-0.747093	-36.8858	3.76123	-37.2163	-0.116898	-36.708	1.04187	-34.0293	-2.65477	-35.4547	0.553974	-35.7377	1.08192	-34.365	2.08342	-35.8556	1.82514	-35.6718	-1.37703	-35.8905	1.41769
	-37.2248	0.423029	-33.9442	0.236918	-34.9729	-0.908278	-36.7119	3.87195	-37.2668	0.0213753	-36.8684	0.988011	-33.9359	-2.87857	-35.0276	0.316133	-35.5597	1.13839	-34.1521	2.19139	-35.4238	1.79645	-35.6492	-1.4228	-35.5694	1.47955
	-37.0595	0.446503	-33.7445	0.172073	-35.4233	-0.256717	-36.2143	3.76727	-37.1796	0.035774	-36.735	1.05895	-33.7025	-3.07835	-35.1874	0.667868	-35.3612	1.22317	-33.9507	2.1926	-35.1469	1.9235	-35.5603	-1.61071	-35.3726	1.46655
	-36.7103	0.749987	-33.5961	0.216559	-34.9478	-0.160432	-36.0621	4.18279	-37.1534	-0.0345079	-36.4957	0.543078	-33.5659	-3.28255	-34.8093	0.533397	-35.081	1.20619	-33.6656	2.22977	-35.1762	1.89548	-35.3455	-1.6451	-35.1146	1.65922
	-36.7211	0.719022	-33.3588	0.185839	-34.7745	-0.240805	-35.804	4.30799	-36.8685	0.056634	-36.631	1.02167	-33.3343	-3.16068	-34.8875	0.632036	-34.9425	1.38138	-33.5329	2.29924	-35.0366	1.82141	-35.1732	-1.65735	-34.9446	1.42634
	-36.6799	0.642798	-32.8337	0.499134	-34.424	-0.0992498	-35.4479	4.35463	-36.6357	0.0860532	-36.7387	1.32011	-33.0751	-3.513	-34.5379	0.562382	-34.6923	1.27601	-33.3005	2.48852	-34.7303	1.93761	-35.11	-1.70408	-34.7752	1.42429
	-36.6377	0.845327	-32.3465	0.256612	-34.1284	-0.410408	-35.2142	4.26198	-36.743	0.110664	-36.7313	1.31355	-32.6423	-3.60717	-34.5644	0.927197	-34.3542	1.31282	-33.0147	2.5394	-34.7415	1.7541	-35.0431	-1.89456	-34.6464	1.37509
	-36.392	0.791362	-32.1729	0.396304	-34.5912	0.134028	-34.8432	4.55777	-36.5587	0.117944	-36.4246	1.39138	-32.5165	-3.54731	-34.0082	0.788034	-34.2334	1.46863	-32.8561	2.58833	-34.5688	2.06475	-34.7862	-2.02886	-34.422	1.63355
	-36.3379	0.79596	-32.111	0.389124	-34.2846	0.315123	-34.6634	4.84777	-36.2867	0.184704	-36.4498	1.45724	-32.1515	-3.87997	-34.2283	0.914995	-34.2857	1.39172	-32.6003	2.65368	-34.3926	2.0008	-34.5643	-2.02383	-34.2132	1.61271
	-35.9499	0.816782	-31.7272	0.454594	-33.9829	0.154828	-34.3846	5.01543	-36.0361	0.212088	-36.315	1.43689	-32.0354	-3.82579	-34.0413	1.0493	-34.1324	1.35233	-32.412	2.78093	-34.3973	2.18663	-34.682	-2.09251	-34.0575	1.49352
	-35.9948	0.841269	-31.3866	0.637069	-33.7298	0.0700359	-34.0751	5.35746	-35.878	0.195393	-36.6792	2.00452	-31.7568	-3.77309	-33.6389	0.828962	-33.8147	1.38883	-32.0784	2.82356	-34.0451	2.09192	-34.2668	-2.06156	-33.8724	1.78887
	-36.0574	0.885807	-31.0129	0.352477	-33.4106	0.233529	-33.8469	5.33612	-35.6839	0.161454	-36.5991	1.86749	-31.5068	-3.83995	-33.7877	1.33396	-33.7088	1.4292	-31.7383	2.96295	-33.9886	2.1372	-34.199	-2.29934	-33.6084	1.77244
	-36.1259	0.870343	-30.7324	0.669032	-33.3718	0.108977	-33.4687	5.63702	-35.4082	0.235371	-36.466	1.85013	-31.1829	-4.12474	-33.48	1.21041	-33.3964	1.48369	-31.6659	2.89348	-33.8172	1.98706	-34.0006	-2.21552	-33.5863	1.77285
	-35.971	0.474005	-30.6268	0.542059	-33.3343	0.322855	-33.2545	5.81484	-35.5477	0.326998	-36.5954	1.94135	-31.0083	-4.05581	-33.2374	1.22761	-33.1204	1.57739	-31.3045	3.12974	-33.7186	2.12907	-33.9997	-2.32928	-33.4919	1.89003
	-35.7501	0.546451	-30.4853	0.59274	-33.3377	0.409311	-32.9583	6.00116	-35.3185	0.344377	-36.534	2.10536	-30.7733	-4.20422	-33.1632	1.28441	-33.1101	1.52578	-31.1551	3.14793	-33.4871	2.21308	-33.6476	-2.29401	-33.2878	1.93857
	-35.7046	0.506592	-30.0095	0.732455	-32.9882	0.271696	-32.8021	6.20467	-34.9899	0.28751	-36.4325	2.33453	-30.4383	-4.13225	-33.1464	1.29985	-32.7743	1.52275	-30.8678	3.17203	-33.3247	2.2236	-33.4397	-2.22117	-32.9736	2.05073
	-35.5566	0.496952	-29.9992	0.553989	-32.4551	0.329056	-32.46	6.46041	-35.2323	0.229896	-36.4694	2.39101	-30.284	-4.18308	-32.7395	1.2656	-32.7567	1.50153	-30.5863	3.19427	-33.0911	2.4976	-33.6066	-2.32903	-32.8435	1.95227
	-35.3887	0.534122	-29.7609	0.611481	-32.3045	0.341472	-32.2297	6.59133	-34.9521	0.402775	-36.4089	2.5095	-30.1304	-4.23851	-32.6077	1.46319	-32.4946	1.66917	-30.7381	3.26384	-32.9095	2.50947	-33.3303	-2.27283	-32.7019	2.11315
	-35.6105	0.620222	-29.3544	0.833481	-32.5124	0.318959	-32.0189	6.68765	-34.7937	0.327486	-36.4516	2.4637	-29.8257	-4.40246	-32.6506	1.37117	-32.3439	1.60446	-30.2089	3.27735	-32.727	2.47011	-33.164	-2.66034	-32.7724	2.3343
	-35.4547	0.755997	-29.1291	0.53425	-32.0922	0.458891	-31.6286	6.9353	-34.4749	0.220692	-36.6774	2.5482	-29.6296	-4.38671	-32.4546	1.44747	-32.1006	1.63493	-30.2288	3.42907	-32.544	2.42514	-33.1078	-2.31948	-32.579	2.43268
	-35.3512	0.826246	-28.9358	0.711785	-31.8522	0.451573	-31.4448	7.1461	-34.2607	0.467409	-36.4531	2.53762	-29.1471	-4.69894	-32.0438	1.27547	-31.972	1.74433	-29.9851	3.50521	-32.516	2.62948	-32.8461	-2.69984	-32.4634	2.46192
	-35.3386	0.741221	-28.3639	0.704441	-31.6845	0.414753	-31.2178	7.28437	-34.1006	0.473246	-36.5385	2.58933	-28.6774	-4.58882	-32.0979	1.35575	-31.8035	1.92067	-29.8021	3.50377	-32.2799	2.54952	-32.6231	-2.59145	-32.2724	2.57062
	-34.9992	0.915067	-28.0705	0.605435	-31.6542	0.303502	-31.0675	7.41446	-34.0423	0.50954	-36.4316	2.66273	-28.5122	-4.36642	-31.8839	1.3904	-31.6908	1.77464	-29.474	3.50676	-32.2348	2.55515	-32.24	-2.80574	-32.2077	2.69515
	-35.0301	0.659803	-27.7348	0.597958	-30.9323	0.317152	-30.8385	7.61985	-33.9135	0.557971	-36.4972	2.54226	-28.1776	-4.33269	-31.591	1.43397	-31.3448	2.01927	-29.2641	3.51966	-32.0572	2.54591	-32.2636	-2.70954	-32.154	2.97118
	-35.1164	0.86555	-27.6021	0.666803	-31.2078	0.400694	-30.4633	7.7858	-33.3499	0.623454	-36.7353	2.94842	-27.7707	-4.334	-31.5487	1.38405	-31.3024	2.13075	-29.4157	3.61542	-31.916	2.74749	-32.0459	-2.79384	-31.8466	2.94236
	-34.9871	0.915052	-27.2651	0.481993	-30.6411	0.106844	-30.2617	7.89565	-33.5709	0.672345	-36.4771	2.64545	-27.4721	-4.46293	-31.0996	1.48503	-31.0321	2.07649	-28.7631	3.46345	-31.7786	2.69391	-31.833	-2.79981	-31.811	3.14332
	-34.7077	1.00835	-26.8591	0.277307	-30.4495	0.30761	-30.0089	8.14223	-33.1658	0.639525	-36.6657	2.73955	-27.1795	-4.48638	-30.9539	1.68596	-30.6675	2.15829	-28.5726	3.31769	-31.6656	2.79478	-31.6578	-2.82834	-31.6562	3.15654
	-34.629	0.950285	-26.4835	0.225714	-30.2883	0.114035	-29.7338	8.31937	-33.1499	0.766512	-36.3908	2.50286	-26.7355	-4.55525	-30.7488	1.59726	-30.5359	2.31202	-28.5394	3.5368	-31.8611	2.74198	-31.3756	-2.85836	-31.696	3.47836
	-34.6426	0.864026	-26.2745	-0.0648453	-29.76	0.126963	-29.3491	8.48594	-32.7781	0.931352	-36.4663	2.72577	-26.5611	-4.35585	-30.636	1.50271	-30.427	2.1995	-28.2141	3.40512	-31.5054	2.70083	-31.2322	-2.85956	-31.3879	3.73566
	-34.5445	0.806059	-25.8206	-0.110234	-29.9171	0.149397	-29.1613	8.56967	-32.4876	1.04906	-36.5538	2.71211	-26.1168	-4.58872	-30.5421	1.60983	-30.2574	2.28993	-27.9466	3.46993	-31.3969	2.98808	-31.1406	-2.93221	-31.3217	3.79415
	-34.336	0.902639	-25.6694	-0.143674	-29.7312	0.00477225	-28.7462	8.88461	-32.5539	0.948354	-36.6789	2.71712	-26.0183	-4.17201	-30.5798	1.70993	-30.1565	2.34605	-27.9384	3.17919	-31.2234	3.0132	-31.0177	-2.92736	-31.4781	4.08223
	-34.3286	1.07442	-25.2877	-0.0689647	-29.2277	-0.0697096	-28.5315	8.9723	-32.6559	0.965945	-36.4926	2.11376	-25.6805	-4.17425	-30.3347	1.54221	-30.0419	2.30357	-27.7652	3.19068	-31.0864	2.90216	-30.6836	-2.96535	-31.5149	4.06105
	-34.1233	0.993357	-25.0921	-0.0984477	-29.0304	-0.0766734	-28.3899	8.9831	-32.0477	1.05561	-36.5455	2.3364	-25.1925	-4.59614	-30.2382	1.61903	-30.0189	2.16207	-27.4364	3.03861	-30.856	3.14964	-30.6199	-3.05394	-31.4031	4.22168
	-34.095	0.907652	-24.8141	-0.249472	-29.1783	-0.0207144	-28.1582	9.18671	-31.9519	1.13838	-36.3739	2.51248	-24.8373	-4.36191	-30.0108	1.57428	-29.7055	2.38588	-27.393	2.95451	-30.8195	3.03875	-30.1772	-3.02567	-31.2139	4.42538
	-33.9647	1.09477	-24.4843	-0.437254	-28.8041	-0.256709	-28.0324	9.34592	-31.7468	1.22107	-36.4308	2.51911	-24.6712	-4.20829	-29.9291	1.66822	-29.563	2.40247	-27.0558	2.98431	-30.7124	3.21068	-30.176	-3.19818	-31.1834	4.57917
	-33.8464	1.02256	-24.1705	-0.675047	-28.2532	-0.332135	-27.7004	9.54708	-31.4194	1.21075	-36.435	2.50169	-24.4059	-4.14617	-29.7257	1.81477	-29.2401	2.33174	-26.9857	2.77248	-30.7957	3.12538	-29.9597	-3.17539	-31.1646	4.61187
	-33.7273	1.00004	-24.0981	-0.612474	-28.0035	-0.368243	-27.4381	9.71192	-31.3052	1.30697	-36.4889	2.51325	-23.9766	-3.94564	-29.6755	1.64923	-29.0458	2.54664	-26.7882	2.62194	-30.5048	3.19328	-29.8896	-3.18615	-31.0798	4.91955
	-33.7178	1.07346	-23.8089	-0.724215	-27.8409	-0.261701	-27.2708	9.82543	-31.4026	1.31016	-36.6542	2.64344	-23.5212	-3.95491	-29.58	1.69519	-28.9711	2.57729	-26.814	2.70409	-30.1978	3.29342	-29.7274	-3.23628	-30.8853	5.15944
	-33.6336	0.931313	-23.5023	-0.956425	-27.6454	-0.504838	-27.2021	10.1296	-31.3405	1.35673	-36.5551	2.6096	-23.3482	-4.13892	-29.4197	1.72136	-28.7545	2.62699	-26.4898	2.28222	-30.0932	3.61409	-29.3451	-3.33656	-30.911	5.3254
	-33.4888	1.00386	-23.1133	-1.08859	-27.6251	-0.260285	-26.8184	10.273	-30.9354	1.57967	-36.5722	2.64976	-22.957	-3.69636	-29.2917	1.89198	-28.5808	2.51537	-26.3496	2.26803	-29.846	3.55806	-29.4279	-3.49489	-30.8694	5.46216
	-33.4758	0.656257	-22.8971	-1.03052	-27.433	-0.539089	-26.5844	10.4694	-30.8683	1.60675	-36.6206	2.70983	-22.7761	-3.85481	-29.1344	1.84836	-28.3821	2.67738	-26.3134	2.30921	-29.8697	3.57071	-29.1372	-3.34795	-30.6757	5.49263
	-33.2482	1.22586	-22.6398	-1.22699	-27.1956	-0.673996	-26.4487	10.7305	-30.6461	1.54043	-36.5514	2.76966	-22.6684	-3.82632	-28.9979	2.00949	-28.1783	2.59786	-25.9959	2.0995	-29.5948	3.73316	-29.0505	-3.51105	-30.6803	5.78022
	-33.2053	1.06789	-22.4149	-1.36538	-26.8532	-0.785422	-26.2076	10.9276	-30.5988	1.72188	-36.5322	2.85179	-22.333	-3.5007	-29.27	1.79147	-28.2713	2.82791	-25.7366	1.98741	-29.4401	3.74842	-28.8195	-3.60163	-30.6237	5.91488
	-33.0089	1.13235	-22.3873	-1.20446	-26.614	-0.894711	-25.9536	11.0007	-30.2546	1.76536	-36.5534	2.77793	-22.1811	-3.7924	-28.6515	1.95169	-27.9022	2.71236	-25.6211	1.81115	-29.262	3.83956	-28.5255	-3.59337	-30.6203	6.12061
	-33.0443	1.19358	-22.113	-1.45153	-26.4767	-1.00914	-25.8275	11.3176	-30.0273	1.92444	-36.5092	2.59744	-22.3006	-3.50887	-28.6688	1.93052	-27.8529	2.69989	-25.5478	1.78541	-29.1263	3.88764	-28.4391	-3.78381	-30.3376	6.21504
	-33.0359	1.17434	-21.8375	-1.3991	-26.4433	-1.02904	-25.5791	11.5648	-29.912	1.92844	-36.4017	2.29107	-22.0561	-3.45577	-28.3903	2.14054	-27.5637	2.79566	-25.1282	1.70636	-29.0226	3.9108	-28.1089	-3.77822	-30.261	6.30191
	-32.7767	1.16837	-21.704	-1.6083	-26.2846	-0.848253	-25.2963	11.8423	-29.631	2.03547	-36.7612	2.52995	-21.9181	-3.58118	-28.4432	1.98105	-27.5525	2.79248	-25.1038	1.62309	-28.7401	4.02322	-27.9925	-3.85505	-30.2281	6.61157
	-32.7081	1.08238	-21.6367	-1.71397	-25.7009	-1.08164	-25.0455	11.8753	-29.6593	2.03895	-36.2279	2.25725	-21.9492	-3.52709	-28.2027	2.0205	-27.3654	2.6778	-25.0494	1.98678	-28.5953	4.09978	-27.8317	-3.96928	-30.0196	6.68345
	-32.7478	1.00193	-21.3737	-1.78929	-25.5426	-1.29973	-24.9503	12.1086	-29.3124	2.14749	-36.4434	2.75491	-21.8732	-3.5331	-27.9137	2.0883	-27.2378	2.84697	-24.641	1.41552	-28.5621	4.17902	-27.6319	-4.06105	-29.9348	6.77389
	-32.6161	1.17778	-20.9187	-2.00059	-25.5804	-1.25704	-24.8057	12.1994	-29.1378	2.15934	-36.2037	2.8826	-21.8974	-3.69663	-27.9046	2.34472	-27.0796	2.79139	-24.4714	1.36941	-28.4618	4.17569	-27.558	-3.94148	-29.8772	6.77396
	-32.6818	1.23848	-20.7917	-2.12042	-25.1609	-1.39757	-24.5398	12.3327	-29.0471	2.30374	-36.3554	2.64828	-21.817	-3.72135	-27.6072	2.23264	-26.971	2.77272	-24.313	1.34981	-28.365	4.24169	-27.3293	-4.03639	-29.7231	6.9826
	-32.5866	1.20138	-20.6569	-1.99209	-24.5707	-1.42477	-24.3905	12.6104	-28.8508	2.43543	-36.2472	2.7104	-21.8121	-3.70549	-27.4771	2.33682	-26.8066	2.85714	-24.041	1.21181	-28.3663	4.17713	-27.2236	-4.05021	-29.5903	7.06427
	-32.4253	1.20004	-20.3887	-2.15603	-24.7576	-1.59588	-24.0439	12.7957	-28.535	2.2583	-36.1772	2.56739	-21.7321	-3.79068	-27.3396	2.27221	-26.4337	3.23566	-23.9523	1.33075	-28.1812	4.24142	-26.8975	-4.07986	-29.4648	7.18967
	-32.2145	1.34441	-20.1726	-2.41955	-24.345	-1.82767	-23.7329	12.9765	-28.4211	2.42412	-36.0034	2.59174	-21.4167	-4.00202	-26.9886	2.3981	-26.754	2.85043	-23.659	0.954821	-27.9235	4.36853	-26.6091	-4.15481	-29.3751	7.40206
	-32.2916	1.31683	-19.8404	-2.58631	-24.2484	-1.57169	-23.6064	12.966	-28.1108	2.50415	-36.1071	2.64301	-21.3437	-3.96883	-26.8572	2.44461	-26.307	2.98654	-23.6654	0.952974	-27.7158	4.38556	-26.5607	-4.18205	-29.2501	7.60826
	-32.1914	1.28618	-19.6335	-2.79727	-24.2157	-1.85815	-23.5388	13.2355	-27.8994	2.39358	-36.0326	2.69165	-21.2395	-4.21733	-26.6667	2.47063	-26.2881	3.00334	-23.4461	0.930157	-27.6826	4.34327	-26.4389	-4.22082	-28.9825	7.66879
	-32.1836	1.24785	-19.1748	-3.02021	-23.5934	-1.92328	-23.1864	13.4179	-27.7189	2.5338	-35.9722	2.69308	-21.1837	-4.32576	-26.5677	2.67908	-26.1664	3.04327	-23.1861	0.587582	-27.4032	4.6841	-26.161	-4.3199	-28.9229	7.84285
	-32.1131	1.2277	-18.9851	-3.12979	-23.753	-1.93427	-22.952	13.4271	-27.3974	2.73666	-36.0534	2.74	-21.0661	-4.18679	-26.1774	2.39472	-26.0758	2.95237	-23.0312	0.536051	-27.4392	4.56454	-25.8678	-4.4071	-28.7079	7.91451
	-31.9841	1.31215	-18.7451	-3.24643	-23.3433	-1.93272	-22.6522	13.5576	-27.2522	2.67522	-35.8981	2.3043	-20.8991	-4.37354	-26.2251	2.61109	-25.8862	3.1329	-22.9113	0.691673	-27.472	4.49799	-25.6811	-4.32469	-28.6268	7.91776
	-31.8826	1.30807	-18.4876	-3.41636	-23.2352	-2.02053	-22.4552	13.6165	-27.0311	2.78259	-35.8114	2.3491	-20.7047	-4.65431	-25.9698	2.7789	-25.5358	3.123	-22.682	0.507095	-27.0832	4.73057	-25.3901	-4.41203	-28.5406	8.21778
	-31.7922	1.24194	-18.1487	-3.65288	-23.3475	-1.81383	-22.1982	13.6713	-26.8124	2.86726	-35.7636	2.66447	-20.5306	-4.71009	-25.7333	2.98772	-25.4137	3.14482	-22.6141	0.460938	-27.2975	4.59695	-25.4331	-4.50111	-28.5678	8.28666
	-31.7572	1.16947	-17.9999	-3.7353	-23.296	-1.78792	-22.0949	13.7825	-26.6663	2.91231	-35.657	2.5023	-20.5509	-4.77306	-25.5327	2.788	-25.2523	3.24019	-22.3387	0.259764	-27.1179	4.68673	-25.1266	-4.53958	-28.1176	8.26413
	-31.9584	1.17769	-17.7935	-3.82152	-22.9265	-1.93293	-21.6616	13.5808	-26.5515	2.93739	-35.588	2.52712	-20.3244	-5.05085	-25.3866	2.96663	-25.2208	3.23314	-22.2442	0.247859	-27.0714	4.47545	-24.8692	-4.53626	-28.181	8.4554
	-31.6269	1.2543	-17.6594	-4.10165	-22.5541	-1.98772	-21.5092	13.7036	-26.0588	3.18332	-35.2756	2.10218	-20.0134	-5.01222	-25.2181	3.03498	-24.8753	3.21976	-22.1235	0.12501	-26.7904	4.5798	-24.7614	-4.59445	-28.0408	8.51951
	-31.5993	1.21701	-17.2873	-4.10473	-22.3749	-2.04771	-21.2976	13.6488	-25.8947	2.96682	-35.3309	2.35332	-19.9791	-5.19195	-24.9945	2.96165	-24.6801	3.28784	-21.864	0.0788045	-26.7645	4.52247	-24.5702	-4.56858	-28.0594	8.74016
	-31.6809	1.06871	-17.095	-4.18405	-22.7898	-1.70558	-21.1356	13.6186	-25.6206	3.29123	-35.3693	2.4583	-19.6944	-5.53414	-24.8434	3.18069	-24.6492	3.37688	-21.7379	0.00603541	-26.8762	4.45032	-24.3349	-4.65403	-27.9576	8.82305
	-31.6143	1.07631	-16.8012	-4.26082	-22.3249	-2.09103	-20.8714	13.572	-25.5579	3.00455	-35.3274	2.35638	-19.4749	-5.66722	-24.3487	2.98327	-24.3392	3.47184	-21.6728	-0.101078	-26.5983	4.53372	-24.2498	-4.68966	-27.585	8.69276
	-31.5792	1.03605	-16.7344	-4.57252	-22.3862	-1.83741	-20.7109	13.8373	-25.3421	3.20822	-34.8835	2.23965	-19.4314	-5.57891	-24.5365	3.14393	-24.3646	3.47994	-21.5893	-0.207089	-26.5477	4.5875	-24.0774	-4.84994	-27.5327	8.78411
	-31.5002	1.07896	-16.3716	-4.6884	-21.9502	-1.66286	-20.6426	13.6438	-25.0373	3.11218	-35.0619	2.45167	-19.1846	-6.08229	-24.1925	3.23474	-24.1302	3.42598	-21.3564	-0.237605	-26.2375	4.45238	-24.0276	-4.92115	-27.5695	8.71817
	-31.3555	1.07075	-16.1352	-4.79049	-22.0415	-1.58199	-20.1622	13.5625	-24.9356	3.17893	-34.8235	2.56174	-18.9957	-6.09165	-23.9371	3.16166	-23.9226	3.39775	-21.2511	-0.311331	-26.1798	4.41691	-23.6103	-5.10363	-27.3071	8.76668
	-31.2712	1.26388	-15.7057	-4.97296	-21.8137	-1.85478	-20.4925	13.8519	-24.7866	3.31912	-34.6659	2.14885	-18.9017	-6.08294	-24.0467	3.30496	-23.8956	3.47732	-20.9581	-0.519119	-26.2131	4.33043	-23.7234	-4.96085	-27.2681	8.79144
	-31.2791	1.14513	-15.6167	-5.11584	-21.453	-1.68727	-20.3513	13.6521	-24.4601	3.25496	-34.3845	2.08121	-18.5687	-6.56734	-23.8452	3.10607	-23.78	3.4988	-20.8814	-0.644344	-25.5893	4.29891	-23.3421	-5.09176	-26.9781	8.77434
	-31.1392	1.1236	-15.3302	-5.24774	-21.1982	-1.77872	-20.2696	13.7471	-24.2537	3.3904	-34.4194	1.84533	-18.4916	-6.56253	-23.3166	3.19629	-23.2808	3.65777	-20.7038	-0.652445	-25.3294	4.28108	-23.1128	-5.3596	-26.8237	8.84644
	-30.893	1.3635	-15.0348	-5.28005	-21.1544	-1.69611	-20.3023	13.8083	-23.8472	3.2282	-34.1249	1.90897	-18.203	-6.78251	-23.5303	3.42399	-23.3361	3.49666	-20.4782	-0.615959	-25.6839	4.30361	-22.9409	-5.43404	-26.6547	8.86987
	-30.69	1.33185	-14.695	-5.35962	-20.9249	-1.47063	-20.3117	13.6962	-23.816	3.45405	-34.2549	2.15059	-18.1389	-6.87761	-23.3426	3.17223	-23.1993	3.6453	-20.2948	-0.754494	-25.1841	4.33719	-22.8377	-5.22841	-26.5276	8.71201
	-30.6528	1.39502	-14.6017	-5.46535	-20.6185	-1.49521	-20.2485	13.4242	-23.5201	3.45277	-34.1533	2.26999	-17.8775	-6.97703	-22.97	3.3337	-23.0548	3.58926	-20.3504	-0.652051	-25.416	4.30035	-22.4218	-5.49948	-26.5301	8.75833
	-30.4331	1.48067	-14.2519	-5.42757	-20.7883	-1.19185	-20.1693	13.2887	-23.3571	3.54776	-33.9819	2.21689	-17.7988	-7.20426	-22.9745	3.20616	-22.9565	3.57362	-20.291	-0.626435	-25.2653	4.44258	-22.3658	-5.63937	-26.3994	8.82666
	-30.5371	1.15805	-14.1223	-5.46163	-20.6833	-0.909708	-20.2873	13.2723	-23.1665	3.74483	-33.7445	2.14238	-17.6651	-7.42836	-22.7794	3.26591	-22.6786	3.57988	-20.0912	-0.796041	-25.0067	4.4684	-22.4316	-5.60203	-26.2582	8.98101
	-30.4204	1.28746	-13.9369	-5.48047	-20.4858	-1.09054	-20.2181	13.1488	-22.8975	3.82118	-33.6953	2.26567	-17.3543	-7.64843	-22.5793	3.28756	-22.5817	3.61746	-19.6365	-1.05875	-25.1085	4.46996	-22.0327	-5.7657	-25.9104	8.90832
	-30.3302	1.37903	-13.5319	-5.41309	-20.3217	-0.683149	-20.1857	12.9634	-22.7515	3.7535	-33.4749	2.19609	-17.3016	-7.61635	-22.5405	3.24445	-22.2678	3.92344	-19.5656	-0.803016	-24.9309	4.47127	-21.7822	-5.72796	-26.0971	8.98427
	-30.1581	1.40581	-13.3988	-5.56416	-20.1631	-0.429464	-20.0035	13.0384	-22.4969	3.84251	-33.1849	2.25036	-17.0792	-7.84154	-22.0074	3.24211	-22.0944	3.81995	-19.6003	-0.775526	-24.6442	4.38317	-21.8499	-5.88977	-25.8308	8.89792
	-29.9689	1.37449	-12.9362	-5.61737	-20.1617	-0.48611	-20.0136	12.7118	-22.2546	3.86758	-33.2474	2.16856	-16.9059	-7.90573	-22.0396	3.29517	-21.9983	3.69985	-19.3637	-0.83879	-24.66	4.37798	-21.6569	-5.94489	-25.7151	8.98481
	-29.6571	1.57185	-12.7752	-5.69918	-20.0502	-0.239407	-19.9204	12.5146	-22.0209	4.0526	-32.7852	2.11011	-16.6383	-7.92121	-22.0181	3.4458	-21.629	3.61033	-19.3535	-0.870705	-24.5185	4.31363	-21.2661	-6.14456	-25.4777	8.8532
	-29.7784	1.19745	-12.4303	-5.89795	-19.9397	-0.132038	-19.7857	12.4122	-21.6105	3.74972	-32.6954	2.21268	-16.4939	-8.18276	-21.9695	3.38292	-21.5448	3.78345	-19.0069	-0.862473	-24.2679	4.37925	-21.1485	-6.14334	-25.367	8.85626
	-29.5544	1.38429	-12.1673	-5.84177	-19.6747	-0.060155	-19.6646	12.0828	-21.3773	3.98187	-32.7478	2.4275	-16.3884	-8.12134	-21.8347	3.3187	-21.4379	3.75425	-18.9481	-0.952897	-24.1169	4.66253	-20.9272	-6.20778	-25.1967	8.67618
	-29.482	1.19433	-12.024	-5.66342	-19.4823	0.287592	-19.6786	12.063	-21.1434	3.87401	-32.4395	2.1277	-16.0742	-8.36764	-21.6065	3.28266	-21.2528	3.63766	-18.4817	-1.00318	-24.0377	4.43261	-20.8571	-6.43898	-25.1207	9.00079
	-29.4405	1.39199	-11.6942	-5.77807	-19.5081	-0.00803987	-19.6405	12.1225	-20.9199	3.94721	-32.3419	2.19173	-15.919	-8.31153	-21.5548	3.31212	-20.9387	3.72671	-18.2778	-1.06805	-23.8276	4.64402	-20.7364	-6.26356	-24.8571	8.88392
	-29.1433	1.36392	-11.5737	-5.73549	-19.421	0.359145	-19.5307	11.8589	-20.5708	4.14328	-32.0303	1.83044	-15.8521	-8.3794	-21.2348	3.3836	-21.0793	3.55101	-18.4148	-1.05477	-23.9135	4.4267	-20.559	-6.34885	-24.8693	8.84502
	-29.1028	1.3628	-11.2892	-5.66247	-19.1543	0.444457	-19.4636	11.6145	-20.2748	4.03338	-32.3459	2.17135	-15.8376	-8.30928	-21.2336	3.38842	-20.7825	3.69352	-17.9677	-1.1793	-23.5684	4.59221	-20.338	-6.48316	-24.6576	8.83155
	-29.1107	1.27622	-11.1133	-5.66444	-19.0544	0.685721	-19.5752	11.6952	-20.1169	4.00491	-32.3723	2.48336	-15.8288	-8.37262	-20.8801	3.27127	-20.3544	3.6334	-17.9611	-1.1266	-23.5961	4.53762	-20.045	-6.47259	-24.4381	8.86757
	-29.1012	1.28586	-10.9912	-5.67093	-18.6907	0.626493	-19.4992	11.2345	-19.8664	4.08073	-31.9659	2.0938	-15.744	-8.36376	-21.0058	3.46451	-20.1947	3.56071	-17.8882	-1.13966	-23.3067	4.54314	-19.8139	-6.54955	-24.5674	8.80723
	-28.913	1.29262	-10.7068	-5.58419	-18.5871	0.761549	-19.4962	11.3894	-19.5431	4.16653	-32.0063	2.17934	-15.7216	-8.40544	-20.5688	3.39427	-19.9593	3.52067	-17.7363	-1.10722	-23.1262	4.61135	-19.8885	-6.4929	-24.2639	8.91598
	-28.7634	1.22403	-10.8292	-5.8056	-18.3309	0.703546	-19.3006	11.1086	-19.2766	4.1466	-31.8998	2.13912	-15.64	-8.73564	-20.6197	3.41131	-19.8202	3.37974	-17.2254	-1.21659	-23.1353	4.73591	-19.3448	-6.7138	-24.2938	8.78953
	-28.5817	1.36436	-10.788	-5.82699	-18.1454	0.99547	-19.3532	10.8604	-18.9891	4.25889	-31.6065	2.26829	-15.6324	-8.72584	-20.4062	3.44122	-19.6536	3.4479	-17.3322	-1.22354	-22.9601	4.63819	-19.2973	-6.8203	-24.129	8.97264
	-28.5352	1.43089	-10.4915	-5.79897	-18.0709	1.02626	-19.2296	10.636	-18.6788	4.44712	-31.6195	2.16311	-15.7715	-8.92368	-20.2693	3.6079	-19.4829	3.41722	-17.2507	-1.2078	-22.9571	4.59662	-19.1089	-6.90386	-24.1798	9.11479
	-28.4335	1.34914	-10.1243	-5.71945	-17.6499	1.18675	-19.1433	10.5914	-18.397	4.34669	-31.2854	1.98357	-15.758	-9.0151	-19.9466	3.45991	-19.2339	3.50307	-16.9218	-1.23725	-22.7959	4.7205	-18.865	-6.88039	-23.9364	9.24483
	-28.3465	1.28861	-10.1907	-5.75735	-17.5855	1.10032	-19.1784	10.4861	-18.0343	4.36367	-31.1248	2.10493	-15.6224	-8.85317	-20.0655	3.6883	-19.2001	3.39521	-16.7501	-1.09667	-22.7698	4.65588	-18.7338	-6.95653	-23.7246	9.06968
	-28.2129	1.13634	-10.0058	-5.69897	-17.39	1.34478	-18.9486	10.0775	-17.8933	4.48562	-31.311	2.06598	-15.6678	-9.222	-19.5677	3.61223	-19.0051	3.32047	-16.4391	-1.18362	-22.6861	4.67865	-18.4124	-6.91514	-23.7438	9.1641
	-28.2565	1.10158	-9.71515	-5.50787	-17.0328	1.27495	-19.1244	9.87433	-17.5067	4.56304	-31.2329	1.97468	-15.6848	-9.47536	-19.4529	3.67893	-18.8607	3.32915	-16.4374	-1.18742	-22.6556	4.70589	-18.1838	-7.00548	-23.6255	9.24588
	-28.0169	1.20695	-9.47663	-5.50907	-16.888	1.41436	-18.874	9.88542	-17.1955	4.63256	-30.8504	2.00353	-15.6304	-9.49003	-19.4395	3.74686	-18.5673	3.33872	-16.1654	-1.2621	-22.5549	4.68245	-17.9981	-6.87885	-23.6879	9.35531
	-27.6691	1.31354	-9.49393	-5.42284	-16.7922	1.69047	-18.7659	9.58436	-16.9829	4.69819	-30.5641	1.89794	-15.6489	-9.59852	-18.9971	3.74665	-18.3022	3.368	-16.0172	-1.14308	-22.7464	4.62966	-18.0081	-6.94155	-23.479	9.5886
	-27.7978	1.23949	-9.26857	-5.523	-16.4713	1.70142	-18.6197	9.51168	-16.8081	4.48257	-30.5757	1.88618	-15.6981	-9.7079	-19.021	3.97913	-17.8821	3.34292	-15.7761	-1.20698	-22.4609	4.37492	-17.8436	-6.95613	-23.4089	9.56505
	-27.6337	1.23051	-8.84112	-5.32273	-16.3233	1.78492	-18.612	9.32617	-16.4707	4.63032	-30.4697	1.91241	-15.8901	-9.86468	-18.6963	4.10548	-17.8279	3.29614	-15.679	-0.96559	-22.4136	4.40729	-17.4103	-6.8925	-23.1335	9.64547
	-27.4502	1.24155	-8.85821	-5.34205	-16.216	1.88953	-18.5631	9.07825	-16.4221	4.68371	-30.2317	2.06056	-15.7958	-10.1764	-18.6744	3.97406	-17.2091	3.20542	-15.4381	-1.02881	-22.3053	4.51635	-17.1117	-7.0388	-23.1292	9.63942
	-27.3064	1.38218	-8.32916	-5.2205	-16.0233	1.85953	-18.2406	8.95779	-16.2251	4.77329	-30.1529	1.7059	-15.9153	-10.3714	-18.4206	3.88979	-17.2162	3.17854	-15.1651	-0.990729	-22.3934	4.60896	-17.118	-7.1098	-22.9627	9.8153
	-27.353	1.30274	-8.18014	-5.22961	-15.6803	2.04513	-18.0326	8.84303	-16.1947	4.69946	-29.8545	1.94095	-15.8488	-10.3569	-18.2526	3.71718	-16.8451	3.15223	-14.9986	-1.01382	-22.4227	4.39665	-17.0967	-7.15672	-22.7506	9.79615
	-27.1061	1.15182	-7.93728	-5.12727	-15.437	1.97439	-17.8031	8.71354	-15.9768	4.82207	-29.7207	1.77324	-15.9351	-10.5402	-18.117	4.03821	-16.6983	3.14619	-14.9408	-0.902949	-22.4118	4.22221	-16.911	-7.13996	-22.7852	9.91863
	-27.0509	1.27511	-7.71999	-5.34785	-15.2654	2.28318	-17.7986	8.84112	-15.8776	4.81534	-29.4607	1.79888	-15.9752	-10.5796	-17.8142	3.9095	-16.5135	3.04594	-14.4623	-0.956615	-22.2592	4.08719	-16.5472	-7.38039	-22.6427	10.0422
	-26.9849	1.30458	-7.6114	-5.33029	-15.294	2.46344	-17.7057	8.99167	-15.8247	4.76246	-29.2195	1.90689	-16.0081	-11.173	-17.6746	4.16645	-16.1617	3.03737	-14.3974	-0.864771	-22.2908	3.88685	-16.3242	-7.27213	-22.47	10.1023
	-26.9281	1.35584	-7.18409	-5.29732	-14.9243	2.42725	-17.5978	8.87456	-15.3849	4.91235	-29.0661	1.69244	-16.0358	-11.3993	-17.4283	4.14776	-15.8752	3.09261	-14.4248	-0.823493	-21.99	4.06337	-16.2515	-7.35696	-22.2273	10.143
	-26.5646	1.31528	-7.22838	-5.41537	-14.5865	2.61249	-17.5487	8.95239	-15.3574	4.97743	-29.2309	1.976	-16.0511	-11.2512	-17.2204	4.18394	-15.7364	2.99857	-14.1157	-0.846017	-21.9646	3.93942	-15.957	-7.49658	-22.069	10.3553
	-26.7306	1.43839	-6.92058	-5.50146	-14.5586	2.76475	-17.518	8.9713	-15.3281	5.02737	-28.6585	1.89074	-15.8303	-11.5311	-16.8443	4.03759	-15.4515	2.99169	-13.894	-0.654429	-22.3596	3.96264	-15.8538	-7.42215	-22.0212	10.3332
	-26.4821	1.46609	-7.23487	-5.61042	-14.1668	2.94084	-17.4949	9.18798	-15.202	5.01697	-28.7685	1.75986	-16.1404	-11.862	-16.6514	4.20368	-15.2667	2.8314	-13.7367	-0.877377	-22.3641	3.8174	-15.7464	-7.49369	-21.8875	10.4177
	-26.5268	1.44247	-6.89858	-5.6106	-13.9581	3.0119	-17.5168	9.00631	-14.9128	5.0444	-28.4665	1.80793	-15.9822	-11.8174	-16.7577	4.08447	-14.9824	2.80254	-13.8884	-0.967694	-22.2888	3.56525	-15.3674	-7.76373	-21.7156	10.4922
	-26.1171	1.527	-7.0369	-5.31659	-13.7263	2.99902	-17.2699	9.27468	-14.8467	5.06103	-28.1255	1.84948	-16.0272	-11.9568	-16.4661	4.10086	-14.6748	2.89177	-13.3742	-0.735022	-21.8673	3.75096	-15.1832	-7.66551	-21.7334	10.7136
	-26.0705	1.56024	-6.94544	-5.45846	-13.5795	3.28591	-17.3449	9.28368	-14.574	5.00825	-27.8959	1.69558	-15.9343	-12.0713	-16.2472	4.14906	-14.4131	2.86672	-13.2999	-0.700839	-22.0587	3.67201	-15.1354	-7.6175	-21.3271	10.5122
	-26.2365	1.46704	-6.91626	-5.472	-13.4086	3.36428	-17.2192	9.38078	-14.3268	5.1422	-27.5354	1.86066	-16.0609	-12.3096	-15.8223	4.07933	-14.2503	2.78385	-13.1668	-0.863208	-22.0456	3.64081	-14.9254	-7.72052	-21.1515	10.9249
	-26.0178	1.55599	-7.04427	-5.2394	-13.2248	3.50137	-17.0288	9.34006	-14.3438	4.95524	-27.3691	1.71698	-15.856	-12.5906	-16.248	4.00616	-13.9118	2.7404	-13.1521	-0.643662	-21.8821	3.6502	-14.7712	-7.90687	-21.0683	10.9685
	-25.9443	1.48249	-6.64029	-4.99673	-12.9656	3.61399	-16.9021	9.03052	-14.2489	5.17242	-27.12	1.85992	-15.6906	-12.6322	-15.6596	4.18467	-13.7574	2.66075	-12.8859	-0.508569	-21.6868	3.50424	-14.6145	-7.91458	-21.2926	11.2201
	-25.7555	1.80554	-6.63615	-4.96703	-12.9475	3.71315	-16.8782	9.25663	-13.9839	5.08026	-26.991	1.88506	-15.4966	-12.7834	-15.4035	4.28514	-13.4398	2.64716	-12.8172	-0.415795	-21.7751	3.29057	-14.5293	-7.96454	-20.894	11.2788
	-25.7668	1.68859	-6.51745	-4.93644	-12.6504	3.76049	-16.7965	8.90254	-14.0232	5.12273	-26.6547	1.69816	-15.832	-12.8872	-15.0811	4.02086	-13.2306	2.46392	-12.4222	-0.575998	-21.6897	3.35475	-14.4398	-7.99709	-20.8866	11.3548
	-25.7546	1.69704	-6.27093	-4.56384	-12.5104	4.00594	-16.6833	8.78745	-13.9478	5.28003	-26.3205	1.61958	-15.7053	-13.1454	-14.5648	4.0042	-13.2217	2.38421	-12.1301	-0.569583	-21.7226	3.40686	-14.1987	-8.03622	-20.8987	11.4269
	-25.6019	1.62092	-6.06065	-4.24504	-12.3537	4.05054	-16.5177	8.62992	-13.9146	5.10046	-25.9084	1.7078	-15.6976	-13.2512	-14.6424	4.08028	-13.127	2.3929	-12.2777	-0.324739	-21.6316	3.24904	-14.1152	-8.18707	-20.4094	11.6329
	-25.5639	1.63228	-5.82847	-4.22452	-12.1152	4.08685	-16.8596	8.64204	-13.7543	5.33464	-25.7903	1.65728	-15.5607	-13.5569	-14.4943	3.96464	-12.8095	2.36238	-11.8933	-0.347518	-21.7608	3.06525	-13.8767	-8.27421	-20.3853	11.5056
	-25.6175	1.69295	-5.70742	-3.87734	-11.9724	4.31387	-16.6972	8.72025	-13.7043	5.48644	-25.6623	1.78849	-15.479	-13.6624	-14.2325	3.9712	-12.7034	2.2671	-11.8215	-0.324506	-21.7477	2.87484	-13.8596	-8.29928	-20.2368	11.835
	-25.5659	1.6061	-5.4868	-3.87002	-11.6794	4.27223	-16.4181	8.34588	-13.7923	5.56049	-25.5412	1.948	-15.4048	-13.8044	-14.0183	3.98343	-12.4161	2.23494	-11.5623	-0.276388	-21.635	3.13042	-13.5761	-8.32375	-20.2277	11.9833
	-25.48	1.76067	-5.40816	-3.61431	-11.5402	4.40423	-16.4047	8.35674	-13.7655	5.53238	-25.1101	1.78143	-15.3942	-14.2123	-13.9568	3.71839	-12.1016	2.21949	-11.4257	-0.247201	-21.6014	2.90541	-13.3898	-8.50538	-20.0851	12.1203
	-25.3321	1.81274	-5.14598	-3.47508	-11.4039	4.28755	-16.2526	7.95558	-13.5555	5.98124	-24.7358	1.95091	-15.0539	-14.291	-13.7561	3.66192	-12.2074	2.21939	-11.1668	-0.0817251	-21.5962	2.90891	-13.1244	-8.50795	-19.9082	12.2424
	-25.37	1.82834	-4.96936	-3.30131	-11.071	4.40327	-16.1857	8.02461	-13.6562	5.7283	-24.5687	1.72038	-15.3268	-14.7618	-13.4842	3.6216	-11.8726	2.13916	-10.9596	-0.0294259	-20.955	2.65139	-13.1994	-8.45271	-19.9072	12.2155
	-25.3854	1.80051	-4.83329	-3.09379	-10.8919	4.81489	-16.2025	7.6676	-13.5481	5.63732	-24.4252	1.94887	-14.3542	-14.0856	-13.0779	3.69003	-11.3903	2.19977	-10.9103	-0.0457106	-21.4487	2.78935	-12.9738	-8.68925	-19.6457	12.376
	-25.3348	1.80382	-4.69449	-3.23515	-10.59	4.80225	-16.2039	7.5156	-13.4879	5.69151	-24.2816	1.89662	-14.5355	-14.5584	-13.1833	3.64927	-11.7644	2.03354	-10.5987	0.114465	-21.4895	2.88396	-12.454	-8.47518	-19.5264	12.5064
	-25.155	1.95402			-10.3814	4.77856	-16.2334	7.48951	-13.4537	5.80431	-23.9001	1.90483	-14.5247	-14.693	-13.0171	3.59919	-11.349	2.12339	-10.4388	0.225515	-21.6144	2.84241	-12.7419	-8.65693	-19.3128	12.6685
	-25.1689	2.11425			-10.116	4.81354	-16.0746	7.27647	-13.5291	5.87372	-23.5701	1.86621	-14.5936	-14.8395	-12.5911	3.60751	-11.5519	1.99365	-10.2342	0.115678	-21.3592	2.71535	-12.3077	-8.68486	-19.1791	12.6514
	-25.1281	2.17818			-9.78478	4.94338	-16.1604	6.9452	-13.3167	5.90648	-23.4506	1.96898	-14.8441	-14.8433	-12.4666	3.68478	-11.0355	1.88091	-9.99466	0.160255	-21.3161	2.74385	-12.3288	-8.71961	-19.0833	12.8082
	-25.1028	2.22708			-9.84724	4.93473	-16.0636	6.83573	-13.3779	5.78259	-23.2701	1.75997	-14.8449	-15.2343	-12.3294	3.5341	-10.7094	2.14116	-9.90522	0.324906	-21.2696	2.69807	-12.22	-8.79311	-18.9887	12.8372
	-25.1128	2.22435			-9.61924	4.77863	-15.8838	6.646	-13.1722	5.85728	-22.8727	1.56415	-15.1592	-15.2428	-11.9563	3.44533	-10.5712	1.93221	-9.48946	0.19152	-21.3079	2.68213	-12.098	-8.93222	-18.7558	12.9456
	-25.1313	1.86648			-9.21705	4.80527	-15.7209	6.53621	-13.0863	5.96553	-22.8446	1.98245	-15.2556	-15.4794	-11.8801	3.44284	-10.4382	1.83937	-9.39256	0.301669	-21.3691	2.52279	-11.791	-8.98331	-18.5016	13.2629
	-25.1335	1.95087			-9.31086	4.65564	-15.6286	6.32365	-13.0662	6.18	-22.4689	1.69749	-15.3914	-15.6964	-11.0346	3.57957	-10.0321	1.85384	-9.23079	0.504395	-21.2842	2.74376	-11.7302	-8.7799	-18.1752	13.1351
	-25.089	1.95557			-9.03057	4.43592	-15.04	6.31391	-12.9857	5.98814	-21.9934	1.55847	-15.751	-15.6489	-11.3719	3.59466	-9.99319	1.70862	-9.26103	0.727172	-21.1724	2.90813	-11.49	-8.86496	-17.9521	13.3789
	-24.8359	1.89892			-9.06837	4.58978	-14.8272	6.00212	-12.9839	5.74675	-21.7855	1.68927	-15.8432	-16.0031	-11.1046	3.39091	-9.76975	1.77427	-9.16427	0.978428	-20.876	2.88718	-11.3088	-8.98548	-17.9602	13.4021
	-24.9916	1.83272			-8.66423	4.43828	-14.6043	5.92485	-12.9883	5.91754	-21.2592	1.39434	-15.8737	-16.1746	-10.7616	3.65179	-9.56105	1.78256	-8.57179	0.618683	-20.6708	2.76528	-11.1993	-8.8856	-17.5436	13.4916
	-24.7985	1.80569			-8.50222	4.37551	-14.7737	5.4982	-13.0132	5.91129	-21.0197	1.59763	-15.9721	-15.938	-10.6837	3.60738	-9.57797	1.73472	-8.47362	0.745632	-20.8638	2.89611	-11.0687	-8.891	-17.3068	13.6997
	-24.5059	2.29206			-8.34028	4.48225	-14.4615	5.35643	-12.9382	5.96012	-20.4529	1.50429	-15.9315	-16.2193	-10.3349	3.54106	-9.16232	1.79378	-8.20749	0.787391	-20.8415	2.78793	-11.0943	-8.8639	-17.0795	13.7264
	-24.585	1.76357			-8.1505	4.5377	-14.1185	5.01895	-12.9265	5.98373	-20.3235	1.59295	-16.1573	-16.5551	-10.2385	3.40735	-9.12197	1.76646	-8.11001	0.862945	-20.3279	2.5369	-10.8435	-8.83309	-16.8688	13.7314
	-24.5584	1.8391			-7.83664	4.27068	-13.9955	4.94346	-12.8724	5.93468	-19.8787	1.42289	-16.2561	-16.6233	-9.83193	3.39456	-8.83367	1.77216	-7.94796	0.97562	-20.7776	2.74467	-10.6438	-8.78117	-16.7083	13.7955
	-24.4527	1.84727			-7.73914	4.26973	-13.6702	4.65588	-12.8454	5.91547	-19.7177	1.44821	-16.2317	-16.7288	-9.66411	3.26003	-8.56486	1.75552	-7.69327	0.991581	-20.1732	2.59794	-10.7399	-8.74822	-16.2847	13.5347
	-24.4387	1.76399			-7.45258	3.93149	-13.3088	4.69156	-12.7861	6.07136	-19.4206	1.47262	-16.333	-16.9905	-9.46076	3.36465	-8.60973	1.61965	-7.70627	1.06418	-20.519	2.78798	-10.5552	-8.67501	-16.0848	13.9964
	-24.2153	1.92553			-7.19511	3.86906	-13.0938	4.42195	-12.6836	6.11936	-19.1729	1.46288	-16.4826	-17.0445	-9.3525	3.30379	-8.34519	1.66094	-7.26627	0.908954	-20.6577	2.59151	-10.4373	-8.73836	-15.879	14.0105
	-24.1283	1.93518			-7.05667	3.74884	-12.8756	4.4109	-12.7207	6.21531	-18.6062	1.74577	-16.6435	-17.2056	-9.41482	3.22543	-8.22709	1.64969	-7.16032	0.872361	-20.6194	2.68317	-10.1874	-8.61249	-15.6411	13.9886
	-23.9376	1.90271			-6.7466	3.80779	-12.7839	3.97906	-12.5377	5.95948	-18.1649	1.4057	-16.6693	-17.3361	-9.32483	3.25667	-8.21862	1.6356	-7.02724	1.09335	-20.4718	2.7247	-10.1566	-8.65395	-15.3723	14.0055
	-23.8898	1.87616			-6.52609	3.71672	-12.5174	3.6532	-12.5032	5.95489	-18.0114	1.3491	-16.6666	-17.178	-8.97597	3.06041	-7.94909	1.70822	-6.91995	0.998711	-20.0839	2.51652	-9.99409	-8.5097	-15.1356	14.1437
	-23.8776	1.74955			-6.4109	3.66902	-12.3889	3.78185	-12.5122	5.9935	-17.7337	1.39374	-16.7182	-17.0575	-8.51499	2.92168	-7.67431	1.62354	-6.21936	0.674873	-20.0239	2.80542	-9.68938	-8.47916	-14.8804	13.9689
	-23.8719	1.49037			-6.2004	3.49854	-12.2313	3.68844	-12.1046	5.77313	-17.3785	1.30456	-16.7967	-17.166	-8.4681	2.86801	-7.61201	1.54916	-5.95215	0.959179	-19.8048	2.64916	-9.66828	-8.4181	-14.6862	13.9334
	-23.8813	1.68913			-5.91041	3.44141	-11.6422	3.49466	-12.0954	6.03887	-17.1401	1.64053	-16.9084	-17.3942	-8.08398	2.89027	-7.11876	1.50056	-6.03948	0.898227	-19.9854	2.84231	-9.54107	-8.5613	-14.4538	13.9721
	-23.5545	1.64875			-5.6301	3.33057	-11.4133	3.17073	-12.1325	5.92738	-17.1475	1.11118	-16.7858	-17.4209	-8.20542	2.95269	-7.10722	1.44			-20.0292	2.75188	-9.36107	-8.35695	-14.3859	13.884
	-23.4033	1.59783			-5.61109	3.22682	-11.3024	3.11186	-11.9616	5.91714	-17.0269	0.795037	-16.9565	-17.4748	-7.92651	2.88491	-7.28694	1.27309			-19.888	2.69147	-9.28389	-8.27218	-14.1805	13.9085
	-23.1696	1.77258			-5.42095	2.99535	-11.3066	2.93013	-11.9122	5.86335	-17.0224	0.886975	-16.5416	-17.4446	-7.81418	2.53163	-6.63972	1.3256			-19.9393	3.01146	-9.20892	-8.31068	-13.9528	13.8487
	-23.0796	1.7488			-5.29362	2.79366	-11.2066	2.72859	-11.8162	5.74423	-16.767	0.735948	-16.6881	-17.4813	-7.61845	2.55573	-6.75989	1.20258			-19.8132	2.77708	-9.07221	-8.29856	-13.5995	13.8434
	-23.1233	1.41565					-10.897	2.60141	-11.5705	5.80917	-16.683	0.731975	-16.6905	-17.6427	-7.61572	2.54033	-6.74021	1.11255			-19.7893	2.69262	-8.93377	-8.21002	-13.3999	13.7373
	-23.2064	1.43879					-10.6699	2.49728	-11.2936	5.78558	-16.4961	0.501905	-16.5275	-17.3682	-7.3956	2.35898	-6.44843	1.20138			-19.6142	2.73643	-8.77159	-8.27984	-13.2865	13.7764
	-23.1158	1.41264					-10.5647	2.21775	-11.3281	5.6534	-16.5831	0.585731	-16.5532	-17.353	-7.35926	2.2789	-6.25598	1.11723			-19.6334	2.71427	-8.45586	-7.95227	-12.91	13.7203
	-22.8244	1.30274					-10.1997	2.18236	-11.0593	5.73547	-16.1031	0.334847	-16.5806	-17.4856	-6.96156	2.26481	-6.24863	0.917572			-19.3557	2.66555	-8.58605	-8.23238	-12.6771	13.7581
	-22.7984	1.33347					-10.1221	2.10855	-11.0446	5.58596	-16.0622	0.310804	-16.8199	-17.5127	-6.97191	2.34334	-6.11237	0.935438			-19.372	2.65089	-8.30716	-8.0582	-12.3133	13.5694
	-22.3146	1.50979					-9.70881	2.09086	-10.6408	5.6088	-15.5775	0.103109	-16.8275	-17.2733	-6.83425	2.14804	-5.75667	0.93679			-19.3563	2.60326	-8.3777	-8.02021	-12.134	13.58
	-22.5611	1.16357					-9.53283	1.87531	-10.5238	5.59178	-15.5141	0.129609	-16.8988	-17.4187	-6.66904	1.97716	-5.71173	0.794224			-19.0507	2.58846	-8.224	-8.11774	-11.9585	13.5681
	-22.3436	1.16817					-9.34338	1.96322	-10.5076	5.55323	-15.4063	0.208722	-17.0601	-17.5583	-6.63435	2.03492	-5.67106	0.91826			-18.9939	2.59862	-7.91295	-8.08387	-11.6328	13.4606
	-22.1573	1.22446					-9.09769	1.81187	-10.2374	5.50794	-15.2026	-0.0544279	-17.0237	-17.4125	-6.5461	2.14733					-18.9735	2.64692	-7.7464	-8.20297	-11.3699	13.3192
	-21.7389	1.53354					-8.83586	1.69531	-10.1269	5.38522	-15.1444	-0.0474972	-17.1705	-17.5742	-6.19577	2.0119					-19.0251	2.33589	-7.81341	-8.12346	-11.1629	13.3193
	-21.976	1.26321					-8.62798	1.62325	-9.93424	5.52816	-14.6968	0.00869529	-17.3711	-17.6318	-6.09125	1.94144					-18.7945	2.36507	-7.641	-8.14788	-10.9497	13.3237
	-21.789	1.16088					-8.34975	1.57146	-9.85913	5.42746	-14.7461	-0.0468183	-17.2174	-17.5855	-6.01004	1.74168					-18.7853	2.30106	-7.56294	-8.08668	-10.7598	13.3281
	-21.7961	1.16767					-8.1304	1.43733	-9.67319	5.43668	-14.4892	4.75079e-05	-17.5677	-17.4002	-5.84652	1.9296					-18.7385	2.41615	-7.48114	-8.08858	-10.6179	13.3213
	-21.4326	1.28197					-8.01874	1.29952	-9.46383	5.44567	-14.1184	0.160018	-17.5097	-17.3917	-5.6936	1.84412					-18.6027	2.19417	-7.42635	-8.10303	-10.4743	13.2834
	-21.4391	1.03479					-7.74384	1.06095	-9.48113	5.5731	-13.8773	0.230266	-17.4925	-17.4528	-5.51	1.786					-18.5227	2.18254	-7.30553	-8.18375	-10.237	13.3989
	-21.0042	1.17971					-7.43507	1.11774	-9.06652	5.61046	-13.7654	0.470242	-17.5557	-17.4311	-5.39211	1.67948					-18.3994	2.25767	-7.04506	-8.13687	-9.90195	13.5145
	-21.2265	0.965851					-7.28493	0.925979	-9.07338	5.68637	-13.4166	0.533093	-17.8184	-17.4198							-18.3798	2.31161	-7.12549	-8.11871	-9.92851	13.5483
	-20.8543	1.01999					-7.0318	0.606833	-8.82166	5.51429	-13.021	0.694882	-18.099	-17.2603							-18.3648	1.80517	-6.99056	-7.94067	-9.70276	13.6455
	-20.9719	0.885007					-6.85473	0.91577	-8.68479	5.51747	-13.0177	0.613546	-18.2862	-17.436							-18.2179	1.87421	-6.90557	-7.96011	-9.57197	13.6546
	-20.7757	0.969096					-6.61578	0.767637	-8.46101	5.42794	-12.9183	1.12108	-18.3352	-17.5833							-18.107	1.86875	-6.78158	-7.8374	-9.54385	13.6557
	-20.4392	0.826894					-6.30193	0.508047	-8.18827	5.53086	-12.5058	1.15821	-18.2719	-17.5085							-18.2063	1.96844	-6.77805	-7.9633	-9.32817	13.9014
	-20.3392	0.831615					-6.15192	0.378873	-7.98687	5.43768	-12.2844	1.09198	-18.4332	-17.5705							-17.8786	1.91584	-6.83982	-7.9142	-8.98403	13.9259
	-20.2435	0.90548					-6.02877	0.290895	-7.91078	5.60938	-12.1967	1.38061	-18.4113	-17.4007							-17.8409	1.95719	-6.58655	-7.59652	-8.7355	13.8623
	-19.6826	1.34225					-5.74662	0.296212	-7.63232	5.49837	-12.0652	1.68422	-18.6564	-17.4371							-17.7539	1.74122	-6.59598	-7.6768	-8.62103	13.8269
	-19.9561	1.04879					-5.57677	0.214458	-7.29234	5.5254	-11.6283	1.70687	-18.5717	-17.2958							-17.6936	1.73308	-6.47848	-7.61297	-8.35774	13.9834
	-19.8377	0.953756					-5.52373	0.0893425	-7.22534	5.37896	-11.4923	1.71178	-18.7037	-17.5231							-17.4982	1.73652	-6.61048	-7.58051	-8.14597	14.152
	-19.5939	1.09545					-5.39515	0.113718	-6.90685	5.55161	-11.3299	2.03626	-18.4527	-17.4333							-17.4031	1.678	-6.12782	-7.31727	-8.11484	14.1466
	-19.6391	1.08666					-5.27142	0.0366476	-6.7418	5.43529	-11.294	2.26954	-18.6756	-17.5308							-17.3135	1.75949	-6.44756	-7.40306	-7.65038	14.0917
	-19.4107	1.07691					-5.24495	-0.134734	-6.53536	5.4608	-10.9022	2.19681	-18.6656	-17.6285							-17.1177	1.49287	-6.23609	-7.44063	-7.61943	14.2319
	-19.1779	1.10708							-6.37172	5.39359	-10.3346	2.67689	-18.7755	-17.6338							-17.1787	1.52907	-6.02883	-7.33265	-7.70881	14.4104
	-18.9412	1.10608							-6.053	5.38559	-10.2929	2.57993	-18.8445	-17.4601							-17.0872	1.68588	-6.00339	-7.31783	-7.3057	14.4156
	-19.1357	1.12347							-6.0587	5.30304	-10.0388	2.75136	-18.7896	-17.3449							-17.0161	1.31794	-6.03587	-7.07585	-7.20616	14.6214
	-18.8042	1.18							-5.77535	5.31577	-9.82784	2.8455	-18.8145	-17.3836							-16.8957	1.45343	-5.89915	-7.15219	-7.09647	14.6933
	-18.5002	1.26736							-5.66275	5.48949	-9.43657	3.01688	-18.6786	-17.4239							-16.6964	1.28142	-5.99592	-6.85529	-7.03252	14.7632
	-18.5166	1.13188							-5.53769	5.24123	-9.29738	3.17494	-18.7726	-17.1906							-16.596	1.35771	-5.4476	-7.10674	-6.7962	14.9537
	-18.5129	1.13329							-5.44964	5.42303	-9.13238	3.28336	-18.4562	-17.1313							-16.4007	1.10305	-5.60177	-6.95063	-6.45678	14.9708
	-18.3869	1.08115							-5.26954	5.48995	-9.0364	3.26757	-18.6207	-17.2099							-16.2828	1.29389	-5.57553	-6.86689	-6.46687	15.0807
	-18.2092	1.05254							-5.29379	5.19619	-9.08054	3.48378	-18.4155	-17.0914							-16.1995	1.2183	-5.53721	-6.85092	-6.39519	15.2493
	-17.7434	1.58139							-5.01495	5.33564	-8.88917	3.74663	-18.1992	-17.0469							-16.107	1.07447	-5.67195	-6.70979	-5.87363	15.2735
	-17.923	1.20993							-4.89678	5.4277	-8.92224	3.87223	-18.2237	-16.9772							-16.019	1.12957	-5.46522	-6.81288	-6.01237	15.3393
	-17.8197	1.2336							-4.84992	5.35162	-8.72443	3.92958	-17.9937	-17.0302							-15.8378	1.19804	-5.44276	-6.60184	-5.78747	15.3126
	-17.7784	1.27631							-4.70131	5.45635	-8.69809	4.55659	-18.0732	-16.874							-15.9116	1.19094	-5.38793	-6.46177	-5.54315	15.4494
	-17.669	1.25089							-4.77532	5.33363	-8.72186	4.76316	-17.7202	-16.7867							-15.6328	0.85087	-5.58886	-6.50725	-5.30882	15.3111
	-17.553	1.20939							-4.36031	5.5741	-8.57229	5.16174	-17.7205	-16.9204							-15.5308	1.01306	-5.53438	-6.4412	-5.2037	15.4469
	-17.1904	1.32183							-4.1292	5.58368	-8.71145	5.41632	-17.5133	-16.8485							-15.6612	1.16787	-5.24097	-6.41219	-5.15258	15.447
	-17.0282	1.6492							-3.84492	5.62743	-8.55061	5.69156	-17.3997	-16.7651							-15.4703	0.955174	-5.31649	-6.33403	-4.72251	15.5413
	-17.0085	1.35026							-3.80303	5.52184	-8.57772	5.81556	-17.156	-16.6564							-15.2215	0.804563	-5.0203	-6.13225	-4.72191	15.3891
	-17.3212	1.24264							-3.67519	5.49857	-8.60012	5.85965	-16.9429	-16.5628							-15.4839	1.04367	-5.00332	-6.17737	-4.67466	15.4244
	-16.7735	1.36908							-3.54539	5.41331	-8.39639	6.13874	-16.7247	-16.3696							-15.2581	0.928171	-5.55303	-6.03144	-4.5928	15.3492
	-16.8115	1.3083							-3.32516	5.35117	-8.40397	6.41528	-16.5747	-16.4457							-15.205	0.892069	-5.05969	-6.16445	-4.51902	15.321
	-16.4568	1.21447							-3.17719	5.27983	-8.46147	6.40225	-16.4643	-16.4096							-15.1717	1.04869	-5.49806	-5.92969	-4.30009	15.2005
	-16.4995	1.31496							-3.04634	5.17388	-8.37941	6.54422	-16.2328	-16.3628							-15.0835	0.987726	-5.61723	-5.91091	-4.20201	15.1207
	-16.3146	1.33839							-2.77623	5.05104	-8.28887	6.45932	-16.1715	-16.4847							-14.977	0.949402	-5.6302	-5.90228	-4.1608	15.039
	-16.1402	1.35555							-2.84039	4.88172	-8.05076	6.44402	-15.9175	-16.1428							-14.949	1.12515	-4.79168	-5.47659	-3.96201	14.9187
	-15.9551	1.83148							-2.45142	4.88925	-8.06439	6.51583	-15.7483	-16.1392							-14.7206	0.91989	-5.18014	-5.6284	-3.98247	14.9528
	-16.0581	1.19125							-2.38717	4.85457	-7.91823	6.62344	-15.7716	-16.3916							-14.841	1.10901	-5.16118	-5.5907	-3.70721	14.977
	-15.8324	1.31446							-2.46411	4.6709	-7.58172	6.65038	-15.5974	-16.131							-14.6011	0.99004	-5.21601	-5.63127	-3.62718	14.7903
	-15.7501	1.30452							-2.07017	4.66673	-7.68241	6.60437	-15.3969	-16.0604							-14.591	0.978335	-5.4751	-5.55163	-3.47466	14.6445
	-15.6474	1.3389							-1.99105	4.52882	-7.62633	6.62277	-15.2955	-15.9003							-14.4957	1.00214	-5.17484	-5.50567	-3.26924	14.5759
	-15.7011	1.31615							-1.87295	4.84654	-7.34921	6.45777	-15.149	-15.9639							-14.3369	1.01694	-5.10818	-5.47814	-3.32379	14.5339
	-15.0828	1.49812							-1.7595	4.92687	-7.01673	6.82523	-15.2381	-15.9595							-14.4453	1.04959	-5.08228	-5.47168	-3.06512	14.5006
	-15.3412	1.42977							-1.49549	4.95987	-6.96099	6.65222	-14.8845	-15.6601							-14.193	0.965369	-5.10973	-5.44979	-2.89573	14.3114
	-15.2509	1.36661							-1.61082	4.80529	-6.94273	6.57643	-14.8527	-15.8936							-14.0034	0.746578	-5.32189	-5.24838	-2.9154	14.1327
	-15.0007	1.40193							-1.13423	4.74448	-6.69407	6.62675	-14.8166	-15.7729							-14.031	1.0946	-5.10497	-5.15935	-2.66773	14.1135
	-14.971	1.5218							-0.944125	4.69942	-6.43999	6.50968	-14.6988	-15.7308							-14.0179	0.97602	-5.10753	-5.14154	-2.56055	13.8393
	-14.9938	1.53629							-0.534313	4.6343	-6.35001	6.45663	-14.5227	-15.7334							-13.8486	0.942312	-5.04671	-5.19687	-2.49796	14.0298
	-14.7221	1.57301							-0.586313	4.7126	-6.00267	6.50237	-14.4929	-15.7385							-13.7916	0.878313	-4.85436	-4.93124	-2.43079	13.8585
	-14.5839	1.43792							-0.110415	4.62068	-5.67661	6.36358	-14.4171	-15.809							-13.9547	0.940556	-5.13308	-4.90265	-2.08586	13.7831
	-14.3904	1.74043							-0.0117814	4.66507	-5.33479	6.21367	-14.3772	-15.5274							-13.6932	0.962554	-4.99421	-4.87401	-2.0348	13.6759
	-14.2954	1.86001							0.369321	4.47171	-5.04264	6.20364	-14.2583	-15.6044							-13.791	0.933086	-4.96851	-4.97071	-1.85833	13.5561
	-14.1825	1.61625							0.598068	4.61589	-4.58884	6.08978	-14.0527	-15.6933							-13.604	0.878323	-4.97973	-4.83234	-1.62921	13.4077
	-14.1462	1.77232							0.690934	4.50365	-4.22595	6.15094	-13.8477	-15.4543							-13.6003	0.883863	-4.84778	-4.7959	-1.48742	13.494
	-14.0395	1.63956							0.931184	4.67873	-3.752	5.9942	-13.7637	-15.1195							-13.6664	0.900884	-4.73646	-4.66773	-1.32972	13.4539
	-13.7107	1.64984							1.25985	4.49178	-3.4505	6.00167	-13.4898	-15.1182							-13.5457	0.985434	-4.69168	-4.60533	-1.2067	13.2961
	-13.492	1.75979							1.37175	4.55914	-3.10573	5.91476	-13.2933	-14.7804							-13.4336	0.606634	-4.41581	-4.53955	-1.04547	13.4362
	-13.6164	1.69146							1.48069	4.79744	-2.64759	5.93696	-13.1846	-14.9009							-13.3709	0.650893	-4.4572	-4.69317	-0.778424	13.4155
	-13.3623	1.8571							1.6815	4.62885	-2.30556	6.00959	-13.1257	-14.5966							-13.2644	0.561555	-4.1117	-4.42752	-0.838378	13.2432
	-13.5153	1.77247							1.92676	4.52061	-1.845	6.00936	-13.0305	-14.6321							-13.151	0.664514	-4.17894	-4.32048	-0.744868	13.3265
	-13.1784	1.85788							1.93719	4.60095	-1.60251	6.06665	-12.8207	-14.6491							-13.1118	0.669426			-0.66086	13.0627
	-13.2246	2.10781							2.21643	4.48465	-1.30792	6.10238	-12.7485	-14.2005							-13.085	0.667217			-0.451818	13.1734
	-13.0051	2.03792							2.19689	4.65735	-0.987414	6.33839	-12.5063	-14.3578							-12.8692	0.616176			-0.165603	13.1756
	-12.5761	2.35365							2.32805	4.49009	-0.543828	6.26832	-12.4018	-14.1855							-12.807	0.62595			-0.287009	13.0812
	-12.8633	2.1733							2.29662	4.6322	-0.334963	6.29286	-12.237	-14.0992							-12.8154	0.62755			-0.283525	12.9526
	-12.8632	2.0035							2.42966	4.47131	-0.00324351	6.63889	-11.9987	-13.9888							-12.8664	0.318378			-0.314605	12.8189
	-12.8322	2.03775							2.70916	4.56384	0.214712	6.695	-11.7682	-14.2736							-12.8702	0.449907			-0.259755	12.696
	-12.6761	2.24066							2.60558	4.43288	0.253904	7.06413	-11.7147	-14.1933							-12.5067	0.251523			-0.233215	12.5548
	-12.5919	2.20496							2.38962	4.61454	0.205583	7.14916	-11.5427	-14.2116							-12.354	0.205039			-0.0156057	12.3561
	-12.4682	2.29002							2.67698	4.45301	0.559996	7.26465	-11.4056	-13.8852							-12.3772	0.225135			-0.099901	12.351
	-12.3877	2.16335							2.91079	4.33689	0.583579	7.59757	-11.4653	-14.1033							-12.4443	0.278528			0.0809023	11.9939
	-12.3097	2.18158							2.91161	4.32375	1.01689	7.73662	-11.2517	-14.2103							-12.4193	0.273005			0.00784661	11.9366
	-12.2363	2.29672							2.94044	4.29859	1.14277	7.92435	-11.1575	-14.0027							-12.114	0.291291			-0.0825678	11.6102
	-12.3606	2.32519							3.12616	4.59962	1.26975	7.92966	-11.2134	-14.0515							-12.0207	0.317539			-0.0492232	11.4682
	-12.2569	2.39871							2.6738	4.38074	1.44951	8.03337	-11.0126	-14.2274							-12.0944	0.212039			-0.0974722	11.2559
	-12.0619	2.37434							2.68823	4.33193	1.51475	8.16833	-10.9577	-14.2931							-11.9479	0.113321			-0.107704	11.0158
	-11.9928	2.3452							2.71849	4.45814	1.55346	8.10639	-10.8978	-14.2239							-11.9092	0.119772			-0.0584479	10.7242
	-12.0035	2.34573							2.76205	4.49933	1.51637	8.01507	-10.8887	-14.4357							-11.6194	0.0671652			-0.118448	10.6035
	-11.7798	2.57807							2.74977	4.48487	1.52806	7.94206	-10.7411	-14.2658							-11.5934	-0.0568337			-0.0805705	10.3625
	-11.6872	2.61236							2.72503	4.41501	1.56701	8.02872	-10.7252	-14.0632							-11.6032	0.081215			-0.245372	10.24
	-11.7915	2.44411							2.74019	4.45075	1.53634	7.91528	-10.6509	-14.0515							-11.3358	0.00389697			-0.395191	10.1342
	-11.9457	2.46095							2.76531	4.48756	1.53993	7.952	-10.5282	-13.979							-11.3481	-0.281143			-0.273756	9.95916
	-11.8473	2.30137							2.78604	4.49731	1.46588	7.95839	-10.554	-13.897							-11.2269	-0.287892			-0.350512	9.77679
	-11.6911	2.35709							2.77337	4.48311	2.87884	6.91149	-10.4747	-13.908							-11.0898	-0.223705			-0.475917	9.69352
	-11.6169	2.54306							2.80655	4.61564	1.81846	7.29446	-10.4475	-13.9205							-11.1153	-0.336127			-0.455388	9.41685
	-11.774	2.59106							2.74881	4.94477	1.81832	7.29333	-10.3338	-13.8861							-10.9893	-0.511429			-0.238508	9.1428
	-11.7502	2.55831							2.89053	4.71047	1.75201	7.47026	-10.271	-13.6995							-10.7643	-0.60011			-0.356209	9.15744
	-11.529	2.74668							3.08157	4.79302	1.79996	7.28547	-10.1822	-13.7372							-10.7442	-0.539034			-0.43592	9.02357
	-11.4863	2.65198							3.2179	4.78246	1.99335	7.12669	-10.1732	-13.5538							-10.7491	-0.817243			-0.593994	8.78948
	-11.5209	2.74495							2.85705	4.63623	1.4814	7.38785	-9.93408	-13.5875							-10.3748	-0.884696			-0.686227	8.55255
	-11.2343	2.64189							2.81907	4.56076	2.15701	7.02494	-9.90075	-13.4273							-10.6587	-0.790612			-0.620801	8.29334
	-10.9786	2.90538							2.81108	4.72735	1.53985	7.2827	-9.86827	-13.3226							-10.2746	-0.856134			-0.720823	8.16878
	-11.0687	2.72038							2.95064	4.80974	1.10573	7.40207	-9.67236	-13.2759							-10.1429	-1.00007			-0.706252	7.88274
	-10.9028	2.72468							3.02753	4.82492	1.23331	7.54252	-9.58056	-13.3122							-10.0237	-1.03559			-0.605982	7.68667
	-10.8219	2.81401							3.05709	4.74843	1.31401	7.31651	-9.46329	-13.2867							-9.98198	-1.01043			-0.768164	7.456
	-10.9899	2.73863							2.82875	5.02778	1.54462	7.83087	-9.34385	-13.3793							-10.0667	-1.08653			-0.643759	7.27915
	-10.3386	2.897							2.65162	4.99581	1.58473	7.62827	-9.24235	-13.1647							-10.0291	-1.06777			-0.678898	7.02453
	-10.6257	2.50706							2.70082	4.99541	1.2807	7.61503	-8.99256	-13.2358							-9.97773	-1.05633			-0.679086	6.80258
	-10.7101	2.68067							2.71271	4.9781	1.13565	7.39176	-8.88378	-13.0424							-9.91014	-0.990147			-0.665536	6.64002
	-10.0747	2.67146							2.71978	4.70701	1.32377	7.54284	-8.70788	-13.2102							-9.73705	-1.10802			-0.681365	6.3978
	-10.3297	2.61481							2.59247	4.9191	1.49074	7.18364	-8.54419	-13.4416							-9.63429	-1.12934			-0.588343	6.14404
	-10.4155	2.63424							2.97151	4.79101	1.47318	7.11499	-8.44226	-13.419							-9.73986	-1.02222			-0.536915	5.93348
	-10.4047	2.66927							2.91407	4.77035	1.531	6.80014	-8.21435	-13.5419							-9.49707	-1.15199			-0.440772	5.62955
	-10.2274	2.50364							3.2635	4.93323	1.53037	6.64946	-7.98886	-13.7283							-9.37106	-1.03812			-0.478102	5.41486
	-10.1322	2.44996							2.86214	4.82644	1.55011	6.61757	-7.87042	-13.7627							-9.36813	-1.00305			-0.412737	5.18096
	-10.0382	2.22153							2.8041	4.97278	1.60715	6.58556	-7.69014	-13.7106							-9.26372	-1.11316			-0.175997	4.92099
	-9.879	2.31163							3.15943	5.03491	1.68722	6.24993	-7.44306	-13.8282							-9.18895	-1.12339
	-9.90804	2.26073							2.98837	5.29685	1.6154	6.10621	-7.20614	-13.8741							-9.09373	-0.906793
	-9.61163	2.29633							2.88058	5.05571	1.56509	5.86898	-6.98561	-14.1928							-8.90865	-1.01544
	-9.58307	2.20891							2.68372	5.14909	1.61981	5.81721	-6.75795	-14.1947							-9.1238	-1.06449
	-9.472	2.27176							2.81316	5.27719	1.69599	5.5398	-6.56818	-14.467							-9.06566	-1.10092
	-9.59205	2.14203							2.74231	5.34672	1.6675	5.37147	-6.47408	-14.2317							-9.02894	-1.08529
	-9.2217	2.27077							2.88966	5.04018	1.61578	5.15863	-6.12648	-14.1151							-8.85942	-1.1359
	-8.7831	1.91995							2.81027	5.3529	1.6201	5.07081	-6.04313	-14.1343							-8.63837	-1.16401
	-9.10242	2.07469							2.54386	5.42054			-5.51342	-14.1573							-8.88998	-1.0423
	-8.95028	1.99567							2.54862	5.59687			-5.58957	-14.0907							-8.60081	-1.12131
	-9.04007	2.04833							2.80453	5.29325			-5.29713	-14.2591							-8.45041	-1.1673
	-8.85843	1.95559							2.4013	5.55723			-5.09033	-14.2748							-8.28002	-1.30082
	-8.75978	2.00606							2.40967	5.47421			-4.96534	-14.1446							-8.07461	-1.30693
	-8.52825	2.08658							2.77489	5.38136			-4.82003	-14.1899							-8.1027	-1.17968
	-8.17521	2.18611							2.74564	5.30579			-4.58665	-14.1996							-8.01818	-1.13315
	-8.3737	1.90039							2.59355	5.32408			-4.40854	-14.1022							-8.19173	-1.07803
	-8.22114	1.89455							2.56521	5.24098			-4.23377	-13.9803							-8.07737	-1.07666
	-8.091	1.925							2.5823	5.22427			-4.30433	-13.8728							-7.9524	-1.05617
	-8.04601	2.05509							2.82566	5.31603			-4.18684	-14.0224							-7.91002	-1.01078
	-8.00284	1.89538							2.8034	5.34532			-4.16601	-13.9893							-7.45124	-1.27451
	-7.54181	1.88313							2.70597	5.45579			-4.23257	-13.7176							-7.64146	-1.20109
	-7.63037	1.90048							2.58847	5.55611			-4.11683	-13.8218							-7.17798	-1.13971
	-7.22039	1.73937							2.58894	5.55753			-4.31014	-13.8179							-7.35203	-1.13308
	-7.12315	1.79491							2.54628	5.53418			-4.28058	-13.7495							-7.334	-1.16955
	-7.18404	1.75091							2.57976	5.47601			-4.40252	-13.438							-6.77308	-1.27114
	-7.0989	1.6744							2.56142	5.47387			-4.47239	-13.2617							-7.06879	-1.09488
	-7.11096	1.61471							2.56516	5.46612			-4.62725	-13.3056							-7.07445	-1.16606
	-6.77327	1.75291							2.55761	5.46277			-4.32178	-13.5478							-6.83535	-1.08681
	-6.76141	1.65669							2.32704	5.39146			-4.43557	-13.217							-6.93528	-0.814922
	-6.65022	1.76141							2.32645	5.38878			-4.35291	-13.1845							-7.08653	-0.744005
	-6.50323	1.81273							2.41626	5.31096			-4.45182	-12.998							-6.62104	-0.772364
	-6.32789	1.78817							2.33608	5.321			-4.1852	-12.3717							-7.21914	-0.519548
	-6.31731	1.79157							2.48249	5.28551			-4.30233	-12.1633							-6.75911	-0.573576
	-6.07623	1.92358							2.40039	5.32382			-4.46265	-12.2958							-6.65295	-0.703557
	-5.81226	1.83077							2.42844	5.29532			-4.60775	-12.26							-6.31613	-0.640239
	-5.96302	1.76191							2.39674	5.31079			-4.69108	-12.0126							-6.82863	-0.405088
	-5.79548	1.74144							2.30085	5.22186			-4.72889	-11.8489							-6.84019	-0.534887
	-5.5935	1.82913							2.38504	5.24979			-4.69771	-11.7326							-6.36233	-0.583303
	-5.63866	1.78262							2.37556	5.13508			-4.76421	-11.4365							-6.23605	-0.589924
	-5.53762	1.76746							2.33366	5.26621			-4.87106	-11.3642							-6.2431	-0.538643
	-4.99181	2.00515							2.31005	5.1131			-4.87319	-11.4255							-6.2787	-0.556103
	-5.23041	1.85338							2.28105	5.43448			-4.88789	-11.2167							-6.36468	-0.542279
	-4.71307	1.97572							2.16537	5.47566			-4.9097	-11.2483							-6.56842	-0.474504
	-5.01505	1.86999							2.26522	5.30669			-4.89486	-11.1237							-6.57905	-0.455027
	-5.00286	1.74605							2.06409	5.08725			-4.90179	-10.9475							-6.39591	-0.12652
	-4.35563	2.0601							1.8456	5.44068			-4.88906	-10.7047							-6.2344	-0.35814
	-4.86208	1.70911							2.00204	5.66612			-4.79939	-10.6277							-6.18354	-0.294491
	-4.6434	1.94202							2.37586	5.35674			-4.90398	-10.5532							-6.16474	-0.239016
	-4.19393	2.09615							1.72342	5.39686			-4.90419	-10.1719							-6.16962	-0.225242
	-4.72843	1.6292							2.05694	5.44503			-4.78967	-10.1807							-5.86692	-0.314144
	-3.97658	1.93679							2.05231	5.4652			-4.89046	-9.90353							-6.0416	-0.304657
	-3.73698	1.95418							2.06396	5.47481			-4.84729	-9.67999							-6.08816	-0.105811
	-4.09817	1.72819							1.96465	5.347			-5.09453	-9.61856							-6.11207	-0.138219
	-3.9356	1.78795							2.0053	5.38329			-5.05519	-9.50182							-6.10826	-0.184813
	-3.88695	1.63752							2.16796	5.51548			-4.94447	-9.24834							-6.02762	-0.22342
	-3.53656	1.61711							2.21418	5.5688			-5.04407	-9.10234							-6.00343	-0.243711
	-3.67359	1.33169							2.19606	5.53016			-5.00933	-8.97727							-6.04603	-0.17838
	-3.34613	1.72657							2.1018	5.49877			-4.88543	-8.70046							-6.01455	-0.207071
	-3.23816	1.38029											-4.9583	-8.65387							-5.87533	-0.319608
	-2.89983	1.39786											-4.9681	-8.64179							-5.99157	-0.266625
	-3.1841	1.23878											-4.71093	-8.2667							-5.93917	-0.256759
	-2.76229	1.20482											-4.67048	-8.21764							-5.9214	-0.406751
	-2.97124	1.18074											-4.51514	-8.01807							-5.76736	-0.431454
	-2.94754	1.26922											-4.53603	-8.00569							-5.63136	-0.421749
	-2.6701	1.27845											-4.41363	-7.76697							-5.6662	-0.453775
	-2.70047	1.27386											-4.36595	-7.48994							-5.73245	-0.394073
	-2.64182	1.36596											-4.40651	-7.34199							-5.76357	-0.379009
	-2.38057	1.22549											-4.24959	-7.25871							-5.80257	-0.340806
	-2.40877	1.12926											-3.98214	-7.02131							-5.74139	-0.400696
	-2.29551	1.18266											-3.97316	-6.96985							-5.58051	-0.503634
	-2.26875	1.13164											-3.76234	-6.72614							-5.56263	-0.448897
	-2.34798	1.10451											-3.74064	-6.4421							-5.49666	-0.593594
	-1.94342	1.03815											-3.54237	-6.47875							-5.54064	-0.492146
	-1.75435	1.15328											-3.2728	-6.01373							-5.32397	-0.744267
	-2.0901	1.03567											-3.2916	-5.92216							-5.31804	-0.742582
	-1.62904	0.949932											-3.31679	-5.60769							-5.30357	-0.739899
	-1.73359	1.17487											-3.38187	-6.00138							-5.23421	-0.689602
	-1.04161	1.16908											-2.9255	-5.46481							-5.21643	-0.725027
	-1.47076	1.09068											-3.00671	-5.28445							-5.13974	-0.710291
	-1.34357	0.981243											-2.48486	-5.05378							-5.13793	-0.695341
	-1.47466	1.10892																			-5.1342	-0.69071
	-1.23343	1.10694																			-5.12409	-0.705086
	-1.11834	0.925946																			-5.1136	-0.70881
	-0.819887	1.06417																			-5.11274	-0.707541
	-1.19827	0.838388																			-5.07166	-0.853441
	-0.841205	0.897119																			-5.04084	-0.846457
	-0.651367	0.912039																			-5.06425	-0.740594
	-0.73267	0.956213																			-5.0258	-0.871988
	-0.367287	1.05544																			-4.6663	-1.06371
	-0.651029	0.808446																			-4.77372	-0.845926
	-0.185358	0.836657																			-4.79771	-0.86326
	-0.573728	0.645716																			-4.81273	-0.864254
	-0.598	0.528108																			-4.8457	-0.854265
	-0.198483	0.732871																			-4.8425	-0.857224
	-0.0169486	0.65527																			-4.78969	-0.978483
	-0.199496	0.58407																			-4.59098	-0.826238
	-0.171748	0.530305																			-4.61389	-0.938418
	-0.151824	0.451031																			-4.58726	-0.903937
	-0.105704	0.411202																			-4.53936	-0.953981
	-0.129187	0.457081																			-4.48307	-1.08598
	-0.140472	0.445524																			-4.46961	-1.0876
	0.204798	0.567943																			-4.5345	-1.03593
																					-4.50911	-0.959977
																					-4.43471	-0.94198
																					-4.21983	-1.11936
																					-3.84165	-1.14846
																					-3.83604	-1.21557
																					-3.88239	-1.21694
																					-4.24184	-1.03478
																					-4.11785	-0.958497
																					-4.21559	-1.02895

## Sheet: 5D
Tracking	Trajectory 1		Trajectory 2		Trajectory 3		Trajectory 4		Trajectory 5		Trajectory 6		Trajectory 7		Trajectory 8		Trajectory 9		Trajectory 10		Trajectory 11		Trajectory 12		Trajectory 13
	X (cm)	Y (cm)	X (cm)	Y (cm)	X (cm)	Y (cm)	X (cm)	Y (cm)	X (cm)	Y (cm)	X (cm)	Y (cm)	X (cm)	Y (cm)	X (cm)	Y (cm)	X (cm)	Y (cm)	X (cm)	Y (cm)	X (cm)	Y (cm)	X (cm)	Y (cm)	X (cm)	Y (cm)
	-40.05	0	-40	0	-39.98	0	-39.89	0	-40.02	0	-39.92	0	-39.95	0	-39.94	0	-39.99	0	-40.03	0	-39.96	0	-39.85	0	-40.01	0
	-39.8	-0.01	-40.06	-0.47	-39.69	-0.04	-39.75	0.09	-39.72	-0.17	-39.54	-0.09	-39.99	0.13	-40	0.08	-39.88	0.11	-39.56	-0.03	-40.23	0.23	-39.69	0.25	-39.93	0.14
	-39.76	-0.18	-39.82	-0.5	-39.68	0.08	-39.67	0.15	-39.54	-0.29	-39.51	0.06	-39.84	0.26	-39.77	0	-39.7	0.24	-39.6	-0.04	-39.72	0.08	-39.74	0.3	-39.79	0.13
	-39.45	-0.06	-39.79	-0.38	-39.51	0.13	-39.48	0.13	-39.27	-0.1	-39.16	-0.18	-39.46	0.02	-39.39	-0.03	-39.75	0.42	-39.28	0	-39.58	-0.11	-39.38	0.08	-39.71	0.06
	-39.46	0.11	-39.51	-0.51	-39.33	0.2	-39.3	0.24	-39.18	-0.22	-39	-0.01	-39.2	0.27	-39.38	-0.41	-39.47	0.51	-38.97	-0.18	-39.2	0.08	-39.4	0.06	-39.42	0.24
	-39.2	0.12	-39.56	-0.64	-39.27	0.21	-39.2	0.03	-39.03	-0.4	-38.78	-0.11	-39.39	0.23	-39.26	-0.39	-39.42	0.57	-39.07	-0.26	-38.97	-0.42	-39.35	-0.35	-39.31	0.2
	-39.16	0.1	-39.36	-0.63	-38.98	0.28	-39.14	0.07	-38.64	-0.4	-38.48	-0.04	-39.08	0.22	-39.01	-0.17	-39.23	0.69	-38.67	-0.26	-39.23	0.08	-39.1	-0.27	-38.92	0.24
	-38.7	0	-39.4	-0.82	-39.02	0.43	-38.85	0.01	-38.33	-0.31	-38.47	0.07	-38.77	0.53	-38.93	-0.18	-38.98	0.74	-38.38	-0.28	-38.72	-0.39	-39.02	-0.37	-38.94	0.41
	-38.72	0.15	-39.14	-0.97	-38.86	0.34	-38.63	0.06	-38.18	-0.3	-38.14	0.14	-38.82	0.33	-38.5	-0.17	-38.93	0.93	-38.43	-0.24	-38.99	0.28	-38.94	-0.52	-38.87	0.58
	-38.41	0.13	-39.11	-0.97	-38.7	0.45	-38.4	0.07	-38.06	-0.48	-38.02	0.05	-38.74	0.31	-38.4	-0.38	-38.79	0.73	-38.1	-0.48	-38.48	-0.04	-38.88	-0.6	-38.49	0.37
	-38.43	0.41	-38.86	-1.17	-38.62	0.49	-38.26	-0.03	-37.82	-0.5	-37.81	0.33	-38.39	0.43	-38.64	-0.6	-38.61	0.84	-37.97	-0.53	-38.28	-0.08	-38.74	-0.8	-38.64	0.55
	-38.48	0.5	-38.86	-1.19	-38.46	0.42	-37.98	0.01	-37.6	-0.62	-37.56	0.18	-38.26	0.32	-38.03	0.11	-38.59	0.91	-37.68	-0.32	-37.99	-0.24	-38.46	-1.02	-38.19	0.4
	-38.11	0.53	-38.76	-1.24	-38.29	0.52	-37.93	-0.08	-37.28	-0.75	-37.29	0.19	-37.97	0.33	-37.82	-0.46	-38.13	1.04	-37.54	-0.41	-38.1	-0.13	-38.64	-1.3	-37.9	0.53
	-37.88	0.64	-38.54	-1.29	-38.15	0.59	-37.81	-0.13	-37.27	-0.79	-37.04	0.16	-37.63	0.4	-37.77	-0.38	-38.13	1.06	-37.37	-0.42	-37.68	-0.28	-38.18	-1.42	-37.87	0.42
	-38.11	0.65	-38.42	-1.33	-37.94	0.84	-37.47	-0.02	-37.03	-0.83	-36.85	0.14	-37.6	0.47	-37.67	-0.69	-37.7	1.34	-37.21	-0.45	-37.79	-0.09	-38.24	-1.58	-37.76	0.47
	-37.76	0.74	-38.05	-1.72	-37.76	0.55	-37.54	-0.16	-36.99	-0.91	-36.63	0.19	-37.27	0.53	-37.26	-0.53	-37.72	1.21	-37.15	-0.54	-37.14	-0.41	-38.24	-1.51	-37.51	0.38
	-37.71	0.79	-38.17	-1.48	-37.62	0.75	-37.16	-0.39	-36.59	-0.86	-36.49	0.16	-37.19	0.54	-37.31	-0.5	-37.36	1.23	-36.89	-0.34	-37.25	-0.47	-38.01	-1.52	-37.5	0.49
	-37.5	0.85	-37.48	-1.52	-37.23	0.8	-37.13	-0.21	-36.68	-0.87	-36.29	0.24	-37.01	0.75	-37.17	-0.48	-37.07	1.39	-36.65	-0.57	-36.69	-0.58	-38.08	-1.8	-37.08	0.45
	-37.33	0.78	-38.03	-0.91	-37.16	0.95	-36.97	-0.21	-36.24	-0.81	-36.01	0.14	-36.83	0.48	-37.03	-0.8	-36.92	1.39	-36.5	-0.54	-37.08	-0.3	-38.05	-2.07	-37.07	0.46
	-37.16	0.93	-38.57	-0.3	-37	0.98	-36.79	-0.33	-36.06	-0.89	-35.74	0.24	-36.59	0.69	-36.76	-0.64	-36.81	1.18	-36.17	-0.42	-36.6	-0.43	-37.79	-2.08	-37.02	0.45
	-37.03	0.95	-37.65	-1.97	-36.74	1.21	-36.73	-0.26	-35.93	-0.72	-35.51	0	-36.26	0.94	-36.96	-0.79	-36.74	1.29	-36.12	-0.51	-36.37	-0.66	-37.84	-2.22	-36.64	0.44
	-36.71	1.13	-37.54	-1.89	-36.5	1.06	-36.43	-0.4	-35.57	-0.8	-35.2	0.19	-36.19	0.49	-35.98	-0.06	-36.24	1.4	-36.04	-0.65	-35.63	-0.91	-37.76	-2.3	-36.61	0.58
	-36.85	1.2	-37.36	-2.1	-36.16	1.19	-36.03	-0.47	-35.41	-0.99	-34.98	0.01	-36.04	0.93	-36.15	-0.4	-35.9	1.23	-35.9	-0.56	-35.8	-0.89	-37.84	-2.42	-36.4	0.71
	-36.67	1.14	-37.2	-2.24	-36.07	1.11	-35.98	-0.44	-35.28	-0.8	-34.69	0.15	-35.99	0.81	-35.75	-0.09	-35.94	1.35	-35.38	-0.41	-35.76	-0.89	-37.71	-2.52	-36.14	0.7
	-36.49	1.1	-37.08	-2.3	-35.74	1.21	-35.52	-0.45	-34.97	-0.89	-34.49	0.34	-35.72	0.66	-35.86	-0.36	-35.79	1.22	-35.25	-0.39	-35.11	-1.09	-37.56	-2.82	-35.97	0.84
	-36.33	1.12	-36.99	-2.16	-35.56	1.18	-35.7	-0.51	-34.66	-1.02	-34.25	0.15	-35.64	1.06	-35.62	-0.5	-35.65	1.31	-35.09	-0.24	-34.86	-0.88	-37.45	-2.85	-35.93	0.82
	-36.26	1.18	-36.76	-2.23	-35.26	1.34	-35.5	-0.43	-34.63	-1.01	-33.91	0.04	-35.58	0.67	-35.42	-0.34	-35.52	1.39	-34.8	-0.35	-34.8	-1.19	-37.46	-3.07	-35.67	1.06
	-36	1.03	-36.66	-2.24	-35.16	1.27	-35.24	-0.5	-34.42	-0.96	-33.66	0.28	-35.22	0.93	-35.04	0.07	-35.22	1.31	-34.64	-0.24	-35.38	-0.69	-37.6	-3.15	-35.66	0.93
	-35.87	1.08	-36.48	-2.3	-34.84	1.45	-34.89	-0.48	-34.15	-1.18	-33.43	-0.03	-35.16	1.18	-35.13	-0.19	-35.09	1.34	-34.29	-0.24	-35.12	-0.61	-37.29	-3.21	-35.32	0.98
	-35.89	1.13	-36.33	-2.33	-34.61	1.33	-34.72	-0.57	-33.81	-1.23	-33.3	0.08	-34.96	1.08	-34.89	-0.28	-34.89	1.24	-34.27	-0.33	-34.6	-0.95	-36.97	-3.29	-35.14	1.06
	-35.61	1.03	-36.01	-2.44	-34.34	1.29	-34.77	-0.6	-33.58	-1.11	-32.88	-0.07	-34.73	1.01	-34.56	-0.14	-34.65	1.32	-33.98	-0.17	-34.52	-1.14	-36.8	-3.44	-35.03	1.12
	-35.36	0.93	-35.97	-2.35	-34.18	1.19	-34.52	-0.65	-33.58	-1.27	-32.86	-0.03	-34.64	1.17	-34.66	-0.24	-34.52	1.41	-33.91	-0.27	-34.64	-0.55	-36.77	-3.63	-35.06	1.33
	-35.32	0.92	-35.78	-2.29	-33.98	1.24	-34.2	-0.62	-33.26	-1.27	-32.45	-0.06	-34.52	1.27	-34.32	-0.28	-34.42	1.58	-33.57	-0.15	-34.9	-0.36	-36.68	-3.41	-34.72	1.27
	-35.12	0.94	-35.61	-2.23	-34	1.07	-34.25	-0.79	-33.19	-1.21	-32.28	0.12	-34.25	1.5	-34	-0.1	-34.05	1.43	-33.04	-0.01	-34.36	-0.45	-36.42	-3.65	-34.49	1.41
	-35.12	0.96	-35.36	-2.22	-33.63	1.2	-33.94	-0.76	-33.09	-1.14	-32.06	0.09	-34.19	1.39	-33.62	-0.05	-33.92	1.39	-33.19	-0.19	-34.1	-0.42	-36.14	-3.79	-34.32	1.47
	-34.98	0.82	-35.24	-2.37	-33.67	1.18	-33.88	-0.8	-32.71	-1.34	-31.71	-0.07	-33.95	1.36	-33.74	-0.18	-33.63	1.09	-32.85	-0.22	-34.11	-0.46	-36.12	-3.83	-34.35	1.45
	-34.79	0.81	-35.07	-2.22	-33.34	1.12	-33.82	-0.88	-32.52	-1.08	-31.43	0.2	-33.8	1.43	-33.51	-0.08	-33.26	1.43	-32.65	-0.08	-33.78	-0.12	-35.99	-3.85	-33.94	1.8
	-34.7	0.73	-34.91	-2.2	-33.14	0.97	-33.71	-0.99	-32.26	-1.36	-31.08	0.03	-33.64	1.78	-33.23	-0.11	-33.27	1.53	-32.85	-0.18	-33.56	-0.49	-35.78	-3.82	-33.97	1.61
	-34.55	0.85	-34.63	-2.32	-32.98	1	-33.45	-0.94	-32.11	-1.26	-31.04	0.25	-33.42	1.56	-33.03	-0.24	-32.96	1.49	-32.6	-0.29	-33.57	-0.34	-35.57	-4.17	-33.99	1.88
	-34.47	0.89	-34.53	-2.27	-32.55	1.08	-33.23	-0.9	-31.96	-1.22	-30.66	0.08	-33.31	1.79	-32.56	-0.15	-32.89	1.39	-32.23	-0.38	-33.83	-0.15	-35.67	-4.12	-33.65	1.9
	-34.26	0.89	-34.37	-2.13	-32.43	1.04	-33.21	-1.18	-31.63	-1.3	-30.44	0.24	-33.08	1.64	-32.81	-0.28	-32.85	1.59	-32.03	-0.39	-33.46	-0.74	-35.41	-4.2	-33.46	2.26
	-34.16	0.82	-34.17	-2.27	-32.19	0.94	-33.08	-1.2	-31.64	-1.35	-30.27	0.3	-33.11	1.35	-32.59	-0.51	-32.65	1.49	-31.7	-0.27	-33	-0.5	-35.29	-4.33	-33.57	2.27
	-34.05	0.71	-33.97	-2.09	-32.05	0.83	-32.92	-1.18	-31.27	-1.42	-29.89	0.27	-32.65	1.71	-32.49	-0.16	-32.5	1.63	-31.51	-0.45	-32.91	-0.61	-35.19	-4.36	-33.37	2.4
	-33.84	0.68	-33.87	-2.11	-31.88	1.02	-32.72	-1.28	-31.25	-1.35	-29.61	0.3	-32.57	1.82	-32.28	-0.71	-32.61	1.69	-31.19	-0.39	-33.44	-0.26	-35.07	-4.48	-33.22	2.55
	-33.8	0.78	-33.52	-2.26	-31.68	0.87	-32.43	-1.29	-30.87	-1.52	-29.33	0.55	-32.52	1.76	-32.23	-0.53	-31.84	1.82	-31.17	-0.5	-33.13	-0.41	-35.07	-4.6	-32.76	2.42
	-33.87	0.42	-33.51	-2.13	-31.52	0.88	-32.27	-1.19	-30.78	-1.25	-29.29	0.55	-32.18	1.54	-31.86	-0.41	-31.76	1.85	-30.93	-0.39	-32.7	-0.5	-34.84	-4.43	-32.7	2.57
	-33.7	0.63	-33.08	-2.1	-31.41	0.74	-32.15	-1.54	-30.59	-1.57	-29.17	0.64	-32.01	1.79	-31.89	-0.72	-31.48	1.83	-31.04	-0.58	-32.33	-0.82	-34.86	-4.37	-32.55	2.57
	-33.28	0.48	-33.06	-2.06	-31.24	0.7	-31.83	-1.53	-30.29	-1.25	-28.85	0.57	-31.99	1.63	-31.62	-0.73	-31.44	1.83	-30.38	-0.25	-32.46	-0.73	-34.43	-4.54	-32.43	2.76
	-33.34	0.43	-32.72	-1.81	-30.96	0.72	-31.91	-1.43	-30.08	-1.55	-28.59	0.44	-31.75	1.78	-31.36	-0.58	-31.29	2.02	-30.65	-0.88	-32.31	-0.94	-34.45	-4.69	-32.28	2.83
	-33.18	0.58	-32.6	-1.92	-30.75	0.59	-31.59	-1.36	-30.07	-1.57	-28.44	0.63	-31.51	1.73	-31.38	-0.56	-31.08	2.13	-30.44	-0.92	-32.27	-0.66	-34.26	-4.55	-32.28	2.87
	-33.37	0.38	-32.39	-1.9	-30.69	0.5	-31.42	-1.62	-29.75	-1.46	-28.28	0.53	-31.33	1.69	-31.3	-0.66	-30.61	2.12	-30.06	-0.67	-32.42	-0.93	-34.17	-4.73	-31.87	2.94
	-33.37	0.71	-32.15	-1.81	-30.39	0.25	-31.33	-1.59	-29.57	-1.7	-28.07	0.67	-31.41	2	-31.08	-0.87	-30.89	2.25	-29.94	-0.72	-31.83	-0.77	-33.91	-4.74	-31.7	3.02
	-32.96	0.54	-31.9	-1.8	-30.3	0.22	-31.18	-1.62	-29.41	-1.75	-27.85	0.51	-31.07	2.01	-31.04	-0.78	-30.6	2.22	-29.59	-0.71	-32.16	-0.71	-34.03	-4.83	-31.65	3.11
	-32.94	0.56	-31.72	-1.75	-30.21	0.02	-30.66	-1.59	-29.2	-1.57	-27.57	0.46	-30.99	1.8	-31.07	-0.91	-30.13	2.1	-29.56	-0.7	-31.77	-1.05	-33.8	-4.91	-31.3	3
	-32.63	0.56	-31.59	-1.7	-29.87	0.06	-30.71	-1.78	-29.13	-1.5	-27.24	0.5	-30.76	2.15	-30.76	-0.65	-30.44	2.23	-29.23	-0.82	-31.4	-1.16	-33.79	-4.98	-31.37	3.08
	-32.67	0.45	-31.37	-1.8	-29.7	-0.12	-30.68	-1.83	-28.71	-1.65	-26.89	0.46	-30.45	2.03	-30.47	-0.72	-30	2.25	-29.04	-0.79	-31.63	-0.72	-33.7	-5.27	-31.24	3.12
	-32.46	0.48	-31.32	-1.81	-29.64	-0.25	-30.35	-1.85	-28.55	-1.36	-26.83	0.49	-30.48	2.07	-30.57	-0.87	-29.79	2.4	-28.78	-0.83	-31.49	-0.96	-33.54	-5.19	-30.87	2.97
	-32.23	0.33	-31	-1.73	-29.26	-0.38	-30.3	-1.68	-28.41	-1.49	-26.47	0.25	-30.17	2.09	-30.23	-0.51	-29.67	2.66	-28.68	-1.02	-31.24	-0.88	-33.41	-5.27	-30.58	3.06
	-32.21	0.43	-30.72	-1.71	-29.18	-0.52	-30.17	-1.96	-28.2	-1.48	-26.23	0.37	-29.85	2.34	-30.32	-0.53	-29.59	2.52	-28.41	-0.83	-31.07	-1	-33.18	-5.53	-30.59	2.92
	-31.96	0.52	-30.35	-1.68	-28.95	-0.63	-30	-1.97	-28.1	-1.35	-25.91	0.26	-29.97	2.34	-30.19	-0.6	-29.35	2.62	-27.78	-0.66	-31.02	-0.82	-33.07	-5.53	-30.41	2.93
	-31.79	0.54	-30.23	-1.88	-28.8	-0.69	-29.96	-1.99	-27.7	-1.42	-25.7	0.28	-29.6	2.28	-29.44	-0.31	-28.94	2.5	-27.89	-0.68	-30.46	-0.57	-32.87	-5.24	-30.15	2.93
	-31.76	0.52	-29.93	-1.75	-28.64	-0.64	-29.64	-2.21	-27.65	-1.24	-25.63	0.37	-29.56	2.34	-29.8	-0.4	-29.06	2.65	-27.94	-0.71	-30.71	-0.8	-33.1	-5.38	-30.26	2.7
	-31.52	0.36	-29.91	-1.83	-28.44	-0.65	-29.51	-1.99	-27.45	-1.29	-25.16	0.27	-29.37	2.14	-29.74	-0.18	-28.84	2.55	-27.59	-0.96	-30.08	-1.12	-32.81	-5.54	-29.83	2.9
	-31.55	0.57	-29.62	-1.94	-28.41	-0.47	-29.31	-2.21	-27.13	-1.05	-24.96	0.35	-29.27	2.22	-29.17	-0.1	-28.62	2.75	-27.45	-0.94	-30.41	-0.66	-32.79	-5.36	-29.8	2.7
	-31.37	0.5	-29.26	-1.79	-28.17	-0.61	-28.99	-2.01	-26.84	-1.1	-24.8	0.46	-29.12	2.11	-29.48	-0.37	-28.42	2.68	-27.04	-0.67	-30.38	-0.73	-32.46	-5.29	-29.55	2.71
	-31.26	0.62	-29.23	-1.9	-28.14	-0.6	-29	-2.23	-26.79	-1.24	-24.6	0.24	-28.88	2.44	-29.41	-0.43	-28.26	2.33	-26.85	-0.66	-29.82	-0.95	-32.36	-5.17	-29.48	2.75
	-31.13	0.54	-28.9	-1.94	-27.91	-0.75	-28.63	-2.22	-26.48	-1.1	-24.26	0.23	-28.87	2.35	-29.37	-0.26	-28.14	2.58	-26.91	-0.79	-30.03	-0.69	-32.46	-5.49	-29.28	2.68
	-31	0.44	-28.76	-1.96	-27.9	-0.66	-28.51	-2.04	-26.37	-1.13	-24.09	0.4	-28.72	2.35	-29.14	-1.01	-27.95	2.84	-26.15	-0.2	-29.25	-0.87	-32.11	-5.24	-28.87	2.57
	-31.04	0.48	-28.52	-1.89	-27.68	-0.65	-28.27	-2.17	-26.22	-1.11	-23.92	0.15	-28.29	2.3	-28.92	-1.04	-27.93	2.6	-26.1	-0.51	-29.54	-0.8	-31.85	-5.5	-28.78	2.89
	-30.85	0.53	-28.34	-2.02	-27.49	-0.69	-28.06	-2.1	-25.87	-1.14	-23.66	0.36	-28.13	2.37	-29.07	-0.57	-27.83	2.78	-25.89	-0.23	-29.13	-1	-31.73	-5.37	-28.76	2.94
	-30.73	0.54	-28.19	-2.07	-27.39	-0.76	-27.74	-2.17	-25.88	-0.87	-23.41	0.36	-27.91	2.73	-28.68	-0.53	-27.74	2.71	-25.71	-0.46	-29.35	-0.59	-31.75	-5.43	-28.55	2.56
	-30.67	0.58	-27.88	-2.02	-27.19	-0.71	-27.39	-2.25	-25.58	-0.86	-23.15	0.38	-27.75	2.64	-28.43	-0.25	-27.54	2.69	-25.48	0.12	-28.89	-0.67	-31.68	-5.41	-28.4	2.8
	-30.42	0.47	-27.82	-1.97	-26.95	-0.53	-27.48	-2.04	-25.63	-0.8	-22.86	0.29	-27.79	2.58	-28.23	0.25	-27.46	2.53	-25.26	-0.44	-28.54	-0.85	-31.63	-5.52	-28.33	2.81
	-30.55	0.64	-27.57	-1.87	-26.8	-0.6	-27.34	-2.04	-25.25	-0.66	-22.68	0.39	-27.59	2.79	-28.58	-0.76	-27.08	2.6	-25.21	-0.51	-28.6	-0.93	-31.52	-5.58	-28.22	2.83
	-30.26	0.61	-27.34	-1.89	-26.51	-0.65	-27.04	-2.16	-24.97	-0.77	-22.36	0.44	-27.34	2.49	-28.27	-0.78	-26.95	2.53	-25.06	-0.47	-28.59	-0.53	-31.21	-5.67	-27.82	2.88
	-30.27	0.56	-26.95	-1.78	-26.38	-0.86	-27.01	-2.12	-25.01	-0.63	-22.2	0.52	-27.2	2.61	-28.19	-0.82	-26.71	2.34	-24.63	-0.37	-27.96	-0.58	-31.32	-5.69	-27.7	2.83
	-30.21	0.64	-26.65	-1.75	-26.13	-0.62	-26.63	-2.21	-24.81	-0.76	-21.9	0.34	-27	2.77	-27.98	-0.34	-26.72	2.29	-24.47	-0.62	-28.07	-0.68	-31.27	-5.7	-27.48	2.82
	-30.02	0.65	-26.43	-1.75	-25.95	-0.67	-26.56	-2	-24.42	-0.68	-21.53	0.38	-27	2.89	-27.99	-0.51	-26.34	2.23	-24.45	-0.36	-27.88	-0.58	-31.11	-5.89	-27.29	2.66
	-30.05	0.66	-26.27	-1.59	-25.71	-0.42	-26.33	-2.06	-24.51	-0.73	-21.46	0.59	-26.52	3.08	-27.73	-0.51	-26.09	2.03	-24.26	-0.46	-28.02	-0.29	-31.08	-5.93	-26.96	2.71
	-29.85	0.7	-26.11	-1.84	-25.61	-0.61	-26.23	-2.27	-24.12	-0.68	-21.25	0.43	-26.55	2.95	-27.61	-0.61	-25.8	1.96	-23.92	0.04	-27.98	-0.31	-30.94	-5.98	-26.93	2.73
	-29.72	0.72	-25.77	-1.64	-25.43	-0.44	-25.8	-2.09	-24.07	-0.76	-21.06	0.38	-26.11	2.86	-27.21	-0.23	-25.75	2.31	-24.14	-0.81	-27.83	-0.25	-30.84	-6.08	-26.79	2.86
	-29.66	0.79	-25.42	-1.41	-25.04	-0.42	-25.69	-1.87	-23.8	-0.7	-20.94	0.59	-26.15	2.93	-26.96	-0.19	-25.49	2.1	-23.93	-0.66	-27.29	-0.38	-30.72	-6.08	-26.5	2.65
	-29.63	0.73	-25.2	-1.03	-25	-0.41	-25.69	-2.22	-23.53	-0.62	-20.64	0.48	-26.03	2.83	-27.15	-0.73	-25.39	1.75	-23.5	-0.61	-27.07	-0.26	-30.67	-6.12	-26.38	2.77
	-29.56	0.77	-24.94	-1.11	-24.73	-0.38	-25.14	-2.3	-23.41	-0.69	-20.47	0.59	-25.87	2.6	-26.71	-0.43	-25.18	1.96	-23.27	-0.44	-26.95	-0.19	-30.62	-6.22	-26.15	2.74
	-29.5	0.7	-24.88	-1.33	-24.54	-0.16	-25.18	-2.26	-23.23	-0.57	-20.21	0.6	-25.53	2.95	-26.63	-0.04	-24.75	1.85	-22.83	-0.24	-26.92	-0.26	-30.32	-6.34	-25.55	2.84
	-29.35	0.74	-24.66	-1.18	-24.38	-0.23	-24.93	-2.05	-23.05	-0.77	-20.06	0.56	-25.32	3.13	-26.23	-0.53	-24.75	1.73	-22.82	-0.62	-26.73	-0.09	-30.25	-6.39	-25.67	2.85
	-29.32	0.78	-24.3	-1	-24.26	-0.19	-24.67	-2.25	-22.95	-0.51	-19.8	0.5	-25.21	2.63	-26.06	-0.34	-24.51	1.76	-22.73	-0.63	-26.58	-0.27	-30.25	-6.43	-25.79	3.08
	-29	0.73	-24.13	-0.88	-24.04	-0.13	-24.45	-2.15	-22.67	-0.73	-19.59	0.75	-24.97	2.78	-25.99	-0.57	-24.2	1.63	-22.64	-1.01	-25.86	-0.37	-30.06	-6.4	-25.61	2.99
	-28.9	0.62	-24.04	-0.85	-23.81	-0.2	-24.14	-2.23	-22.63	-0.68	-19.4	0.69	-25.09	2.82	-25.82	-0.61	-23.95	1.52	-22.25	-0.49	-25.89	-0.11	-29.97	-6.51	-25.38	3.02
	-28.82	0.87	-23.63	-0.73	-23.73	-0.23	-23.87	-2.3	-22.38	-0.44	-19.08	0.75	-24.94	2.82	-25.52	-0.52	-23.79	1.38	-22.32	-0.87	-25.98	-0.23	-29.94	-6.66	-25.03	3.26
	-28.7	0.77	-23.58	-0.74	-23.39	-0.2	-23.86	-2.29	-22.38	-0.67	-18.89	0.72	-24.8	2.68	-25.74	-1	-23.75	1.4	-22.04	-0.92	-26.04	-0.05	-29.87	-6.64	-24.92	3.36
	-28.7	0.69	-23.23	-0.72	-23.16	-0.19	-23.55	-2.27	-22.14	-0.61	-18.76	0.88	-24.54	2.81	-25.37	-0.78	-23.75	1.29	-21.65	-0.7	-25.86	-0.08	-29.89	-6.77	-24.67	3.36
	-28.55	0.69	-23.06	-0.57	-23.02	-0.2	-23.38	-2.16	-22	-0.42	-18.62	0.65	-24.28	3.25	-25.34	-0.65	-23.15	1.17	-21.32	-0.46	-25.23	-0.37	-29.71	-6.78	-24.69	3.34
	-28.4	0.62	-22.7	-0.49	-22.81	-0.22	-23.14	-2.27	-21.83	-0.44	-18.28	0.7	-24.21	3.03	-25.18	-1.23	-22.97	1.13	-21.43	-0.98	-25.19	-0.19	-29.69	-6.79	-24.39	3.43
	-28.4	0.63	-22.29	-0.51	-22.34	-0.08	-23.02	-2.32	-21.84	-0.35	-18.03	0.52	-23.89	3.09	-25.1	-0.93	-22.74	1.19	-20.9	-0.16	-25.35	0.04	-29.55	-6.97	-24.2	3.36
	-28.21	0.64	-22.23	-0.4	-22.17	-0.06	-22.81	-2.23	-21.58	-0.22	-17.82	0.61	-23.78	3.18	-24.93	-0.87	-22.32	0.99	-20.65	-0.33	-24.62	-0.45	-29.52	-7.15	-23.9	3.21
	-27.95	0.68	-21.82	-0.3	-21.81	-0.07	-22.54	-2.26	-21.45	-0.15	-17.7	0.64	-23.87	2.84	-24.79	-0.73	-22.21	0.9	-20.83	-0.63	-24.72	-0.1	-29.36	-7.18	-23.9	3.32
	-27.86	0.78	-21.55	-0.34	-21.65	-0.02	-22.35	-2.32	-21.24	-0.21	-17.56	0.79	-23.52	3.12	-24.69	-0.94	-22.03	0.84	-20.29	-0.52	-24.64	-0.03	-29.37	-7.09	-23.79	3.4
	-27.82	0.77	-21.19	-0.26	-21.41	-0.08	-22.12	-2.21	-21.05	-0.27	-17.24	0.67	-23.39	3.23	-24.65	-1.04	-21.86	0.6	-20.23	-0.46	-24.23	0.1	-28.85	-7.4	-23.37	3.19
	-27.69	0.68	-20.97	-0.23	-21.18	-0.01	-21.75	-2.27	-21.13	-0.29	-17.16	0.62	-23.14	3.22	-24.55	-0.92	-21.81	0.63	-20.04	-0.46	-24.28	0.4	-28.83	-7.52	-23.3	3.29
	-27.43	0.54	-20.77	-0.12	-21.04	-0.05	-21.73	-2.19	-20.78	-0.12	-17.08	0.82	-22.97	3.31	-24.39	-0.73	-21.78	0.73	-20.28	-0.92	-24.05	0.16	-28.63	-7.66	-23.12	3.47
	-27.45	0.51	-20.38	-0.19	-20.72	-0.04	-21.6	-2.17	-20.71	-0.36	-16.65	0.75	-22.64	3.18	-24.35	-0.63	-21.48	0.55	-19.83	-0.62	-23.51	-0.25	-28.73	-7.73	-22.9	3.28
	-27.21	0.5	-20.04	0.01	-20.73	-0.02	-21.24	-2.07	-20.52	-0.18	-16.61	0.89	-22.53	3.2	-24	-0.89	-21.18	0.49	-19.5	-0.77	-23.37	-0.27	-28.63	-7.76	-22.86	3.53
	-27.06	0.41	-19.84	0.02	-20.34	-0.13	-21.04	-2.2	-20.31	-0.19	-16.29	0.86	-22.46	3.25	-24.04	-0.71	-21.15	0.19	-19.4	-0.66	-23.13	-0.28	-28.35	-7.91	-22.85	3.56
	-26.82	0.52	-19.69	-0.07	-20.09	-0.17	-20.69	-2.17	-20.13	-0.28	-16.09	0.85	-22.23	3.43	-24.07	-0.9	-20.93	0.43	-19	-0.58	-22.98	-0.14	-28.27	-8.03	-22.58	3.36
	-26.83	0.38	-19.43	-0.06	-20	0.13	-20.55	-2.18	-20	-0.12	-15.85	0.78	-22.04	3.28	-23.65	-0.69	-20.85	0.69	-18.68	-0.32	-23.06	-0.1	-28.33	-7.88	-22.45	3.37
	-26.64	0.22	-19.18	0.06	-19.82	-0.04	-20.54	-1.99	-19.97	-0.22	-15.81	0.99	-21.8	3.48	-23.55	-0.54	-20.47	0.37	-18.54	-0.36	-22.66	-0.09	-27.95	-7.89	-22.01	3.43
	-26.66	0.36	-18.83	0.16	-19.55	-0.17	-20.26	-2.08	-19.72	-0.5	-15.61	1.08	-21.76	3.55	-23.42	-0.5	-20.37	0.57	-18.71	-0.68	-22.9	0.14	-27.82	-8.23	-21.99	3.6
	-26.41	0.16	-18.52	0.11	-19.37	0.01	-20.04	-2	-19.66	-0.5	-15.35	0.93	-21.6	3.57	-23.28	-0.67	-20.23	0.23	-18.65	-0.89	-22.31	0	-27.93	-8.27	-21.67	3.42
	-26.15	0.22	-18.07	0.24	-19.16	0.14	-19.82	-2.02	-19.39	-0.3	-15.02	0.98	-21.35	3.45	-23.41	-0.57	-19.91	0.17	-18.27	-0.57	-22.23	-0.05	-27.62	-8.45	-21.42	3.41
	-26.07	0.23	-17.9	0.25	-18.96	0.14	-19.55	-2.03	-19.13	-0.65	-14.8	1.23	-21.19	3.4	-23.04	-0.35	-19.94	-0.02	-17.95	-0.4	-22.33	0.25	-27.6	-8.3	-21.37	3.43
	-25.95	0.01	-17.51	0.19	-18.59	0.23	-19.32	-1.96	-19.2	-0.45	-14.75	1.12	-21.03	3.55	-22.96	-0.19	-19.61	0.03	-18.17	-0.79	-21.82	0.24	-27.45	-8.39	-21.11	3.43
	-26.02	0.03	-17.15	0.16	-18.39	0	-19.11	-1.89	-19	-0.66	-14.59	1.1	-20.9	3.67	-22.85	-0.09	-19.36	-0.13	-17.74	-0.71	-21.81	0.11	-27.25	-8.45	-20.84	3.33
	-25.73	0	-17.01	0.16	-18.32	0.32	-18.86	-1.85	-18.81	-0.23	-14.28	1.18	-20.65	3.65	-22.88	-0.25	-19.14	-0.03	-17.93	-0.48	-21.51	-0.05	-27.08	-8.29	-20.8	3.26
	-25.53	-0.02	-16.75	0.26	-18.06	0.42	-18.8	-1.68	-18.69	-0.52	-14.02	1.13	-20.42	3.68	-22.7	-0.19	-18.81	-0.32	-17.26	-0.28	-21.7	0.16	-27.18	-8.53	-20.5	3.34
	-25.42	0.14	-16.49	0.3	-17.97	0.38	-18.47	-1.82	-18.57	-0.5	-14.08	1.2	-20.15	3.72	-22.64	-0.14	-18.84	-0.26	-17.37	-0.57	-21.07	-0.22	-26.9	-8.61	-20.51	3.34
	-25.33	0.03	-16.06	0.34	-17.74	0.53	-18.26	-1.89	-18.42	-0.51	-13.81	1.11	-19.98	3.53	-22.29	-0.06	-18.78	-0.31	-17.15	-0.58	-20.94	0.01	-26.95	-8.44	-20.25	3.25
	-25.18	-0.1	-15.85	0.2	-17.44	0.6	-18.19	-1.84	-18.17	-0.53	-13.61	1.07	-19.8	3.85	-22.26	-0.09	-18.23	-0.65	-16.91	-0.61	-20.89	-0.12	-26.9	-8.59	-19.89	3.38
	-24.93	-0.19	-15.54	0.29	-17.28	0.84	-17.87	-1.74	-18.02	-0.51	-13.45	1.18	-19.59	3.67	-22.41	-0.09	-18.06	-0.65	-16.93	-0.61	-20.71	-0.06	-26.43	-8.52	-19.88	3.3
	-24.67	0.02	-15.41	0.25	-17.04	0.8	-17.63	-1.9	-17.88	-0.67	-13.05	1.19	-19.46	3.57	-22.21	-0.09	-18.14	-0.46	-16.3	-0.56	-20.61	-0.06	-26.46	-8.51	-19.59	3.3
	-24.48	-0.16	-15.02	0.22	-16.9	0.77	-17.27	-1.83	-17.76	-0.66	-12.88	1.24	-19.06	3.79	-22.25	-0.19	-17.86	-0.69	-16.3	-0.82	-20.52	0.05	-26.2	-8.62	-19.37	3.17
	-24.35	-0.23	-14.75	0.4	-16.73	0.77	-17.02	-1.69	-17.49	-0.55	-12.92	1.4	-18.91	3.74	-21.85	-0.02	-17.78	-0.9	-16.04	-0.33	-20.15	-0.15	-25.97	-8.55	-19.12	3.2
	-24.13	-0.24	-14.47	0.09	-16.39	0.89	-16.93	-1.62	-17.18	-0.67	-12.59	1.25	-18.76	3.68	-21.92	-0.01	-17.43	-1.15	-16.14	-0.51	-20.08	-0.42	-26.04	-8.43	-19.01	3.11
	-24.11	-0.34	-14.12	0.18	-16.27	0.91	-16.85	-1.69	-17.19	-0.77	-12.33	1.36	-18.28	3.79	-21.64	-0.03	-17.38	-0.96	-16.05	-0.61	-20.08	0.04	-25.71	-8.46	-18.85	3.21
	-23.89	-0.4	-13.89	0.01	-16.03	1.01	-16.53	-1.73	-16.95	-0.76	-12.4	1.23	-18.37	3.46	-21.51	0.08	-17.18	-0.98	-15.62	-0.22	-19.53	-0.38	-25.4	-8.47	-18.59	3.18
	-23.74	-0.32	-13.35	0.11	-15.91	0.81	-16.39	-1.72	-16.92	-0.68	-12.1	1.47	-18	3.75	-21.19	0.15	-16.7	-1.21	-15.53	-0.21	-19.51	-0.35	-25.42	-8.42	-18.23	3.21
	-23.52	-0.35	-13.13	0.15	-15.56	0.84	-16.16	-1.76	-16.67	-0.69	-11.74	1.51	-17.89	3.69	-21.15	0.2	-16.61	-1.39	-15.61	-0.55	-19.17	-0.69	-25.1	-8.36	-17.98	3.21
	-23.41	-0.47	-12.87	-0.06	-15.47	0.79	-15.96	-1.57	-16.42	-0.84	-11.65	1.4	-17.61	3.92	-21.19	0.04	-16.6	-1.34	-15.44	-0.59	-19.15	-0.53	-25	-8.43	-18.04	3.33
	-23.31	-0.37	-12.62	-0.03	-15.25	0.99	-15.63	-1.69	-16.31	-0.96	-11.3	1.45	-17.55	3.92	-21.28	0.06	-16.44	-1.46	-15.08	-0.4	-18.89	-0.61	-24.99	-8.28	-17.81	3.48
	-23.06	-0.54	-12.3	-0.12	-15.04	1.02	-15.44	-1.58	-16	-0.95	-11.36	1.43	-17.35	3.91	-20.67	0.02	-16.03	-1.52	-14.88	-0.61	-18.68	-0.48	-24.73	-8.36	-17.66	3.29
	-22.77	-0.53	-11.73	-0.07	-14.92	1.08	-15.29	-1.45	-16.04	-0.85	-10.94	1.5	-17.27	3.76	-20.79	0.1	-15.78	-1.71	-14.79	-0.55	-18.35	-0.92	-24.72	-8.04	-17.42	3.44
	-22.62	-0.46	-11.44	-0.01	-14.86	1	-15.07	-1.47	-15.54	-0.89	-10.82	1.6	-16.9	3.87	-20.51	0.03	-15.91	-1.6	-14.7	-0.53	-18.37	-0.68	-24.46	-8.11	-17.23	3.44
	-22.49	-0.56	-11.34	-0.14	-14.54	0.85	-14.91	-1.58	-15.64	-0.96	-10.58	1.33	-16.81	4.1	-20.13	0.06	-15.41	-1.88	-14.47	-0.61	-18.22	-0.48	-24.43	-8.05	-17.06	3.3
	-22.37	-0.49	-10.99	-0.24	-14.56	0.82	-14.74	-1.43	-15.47	-1.04	-10.46	1.56	-16.58	3.7	-20	0.12	-15.15	-1.78	-14.46	-0.85	-18.36	-0.8	-24.14	-7.91	-16.9	3.44
	-22.04	-0.66	-10.49	-0.26	-14.46	0.64	-14.49	-1.37	-15.13	-0.93	-10.19	1.33	-16.52	3.68	-20.24	0.25	-15.16	-1.6	-13.9	-0.59	-18.19	-0.61	-24.15	-7.92	-16.82	3.62
	-21.84	-0.71	-10.24	-0.25	-14.3	0.61	-14.23	-1.5	-14.83	-1	-9.97	1.52	-16.12	3.83	-19.76	-0.12	-15.06	-1.89	-13.91	-0.64	-17.56	-1.25	-23.84	-7.63	-16.58	3.3
	-21.74	-0.64	-9.88	-0.34	-14.1	0.92	-13.79	-1.4	-14.88	-1.08	-9.96	1.61	-15.8	4.2	-19.58	0.08	-14.66	-1.67	-13.64	-0.39	-17.65	-1.37	-23.73	-7.7	-16.51	3.42
	-21.62	-0.86	-9.53	-0.21	-13.8	0.78	-13.74	-1.45	-14.64	-1.18	-9.64	1.37	-15.89	4.08	-19.33	-0.15	-14.39	-1.86	-13.71	-0.79	-17.7	-1.04	-23.58	-7.55	-16.24	3.27
	-21.38	-1.23	-9.21	-0.36	-13.67	0.67	-13.52	-1.47	-14.48	-0.97	-9.53	1.44	-15.72	4.04	-19.23	-0.15	-14.35	-1.64	-13.36	-0.43	-17.21	-1.17	-23.43	-7.54	-16.06	3.26
	-21.29	-1.03	-9.07	-0.45	-13.41	0.5	-13.39	-1.46	-14.24	-0.9	-9.29	1.47	-15.25	4.11	-18.97	0.12	-13.88	-2.02	-13.31	-0.78	-16.93	-1.34	-23.16	-7.36	-16.03	3.34
	-21.03	-0.92	-8.62	-0.27	-13.47	0.53	-13.12	-1.49	-14.06	-1.21	-9.06	1.66	-15.11	4.15	-18.73	0.02	-13.91	-2.18	-13.06	-0.78	-17	-1.51	-22.74	-7.38	-15.67	3.23
	-21.03	-1.41	-8.2	-0.32	-13.31	0.47	-13.02	-1.37	-13.97	-0.98	-8.78	1.48	-15.02	4.26	-18.58	0.01	-13.86	-2.16	-12.76	-0.44	-16.73	-1.47	-22.56	-7.18	-15.56	3.29
	-20.8	-1.23	-7.97	-0.43	-12.97	0.47	-12.79	-1.38	-13.75	-1.13	-8.74	1.49	-14.86	4.28	-18.52	-0.02	-13.4	-2.39	-12.78	-0.54	-16.48	-1.39	-22.4	-7.22	-15.53	3.33
	-20.61	-1.17	-7.77	-0.35	-12.81	0.38	-12.44	-1.44	-13.72	-1.17	-8.52	1.79	-14.86	4.15	-18.48	0.02	-13.37	-2.19	-12.57	-0.49	-16.59	-1	-22.17	-7.3	-15.33	3.21
	-20.38	-1.25	-7.31	-0.21	-12.72	0.42	-12.15	-1.38	-13.4	-1.04	-8.15	1.59	-14.72	4.37	-18.12	0.11	-13.27	-2.2	-12.39	-0.31	-16.2	-1.42	-22.43	-7.19	-15.15	3.14
	-20.21	-1.2	-7.18	-0.3	-12.38	0.34	-11.99	-1.33	-13.29	-1.28	-7.93	1.52	-14.61	4.34	-17.84	0.02	-12.81	-2.23	-12.29	-0.33	-16.22	-1.16	-21.81	-6.94	-14.91	3
	-20.06	-1.24	-6.79	-0.32	-12.31	0.18	-11.95	-1.35	-13.05	-1.02	-7.59	1.51	-14.42	4.51	-17.67	0.11	-12.6	-2.36	-12.21	-0.74	-16.02	-1.28	-21.7	-6.94	-14.65	2.92
	-19.93	-1.39	-6.43	-0.35	-12.19	0.27	-11.5	-1.32	-12.82	-1.21	-7.6	1.48	-14.2	4.48	-17.53	-0.2	-12.38	-2	-12.18	-0.58	-15.71	-1.25	-21.57	-6.9	-14.7	2.92
	-19.74	-1.24	-6.27	-0.28	-12.01	0.1	-11.09	-1.39	-12.65	-1.25	-7.41	1.52	-14.11	4.38	-17.4	0.17	-12.27	-2.38	-11.85	-0.44	-15.63	-1.44	-21.25	-6.92	-14.15	2.82
	-19.64	-1.34	-5.9	-0.41	-11.66	0.23	-11.22	-1.54	-12.63	-1.38	-6.92	1.36	-14.06	4.52	-17.1	0.25	-12.09	-2.26	-11.56	-0.29	-15.21	-1.49	-21.04	-6.78	-14.2	2.68
	-19.53	-1.32	-5.79	-0.39	-11.58	0.12	-10.76	-1.68	-12.27	-1.36	-6.93	1.45	-13.75	4.79	-17.03	0.06	-11.64	-2.44	-11.6	-0.48	-15.19	-1.51	-20.87	-6.87	-13.86	2.54
	-19.31	-1.33	-5.53	-0.39	-11.31	0.08	-10.8	-1.3	-12.27	-1.48	-6.73	1.54	-13.76	4.33	-16.79	-0.01	-11.7	-2.6	-11.31	-0.19	-15.04	-1.65	-20.57	-6.8	-13.9	2.6
	-19.31	-1.53	-5.16	-0.5	-11.17	0.01	-10.64	-1.63	-12.17	-1.47	-6.62	1.45	-13.52	4.55	-16.54	0.12	-11.36	-2.43	-11.45	-0.54	-14.81	-1.6	-20.4	-6.67	-13.64	2.42
	-19.02	-1.4	-4.92	-0.52	-10.63	0.15	-10.23	-1.69	-11.93	-1.58	-6.46	1.52	-13.13	4.71	-16.45	0.03	-11.16	-2.86	-11.16	-0.53	-14.64	-1.52	-20.17	-6.65	-13.81	2.43
	-18.93	-1.33	-4.53	-0.45	-10.49	-0.09	-9.87	-1.75	-11.89	-1.48	-6.18	1.51	-13.26	4.65	-16.12	0.41	-11.23	-2.9	-10.9	-0.33	-14.49	-1.37	-19.9	-6.48	-13.63	2.26
	-18.87	-1.41	-4.2	-0.57	-10.16	0.01	-9.87	-1.65	-11.97	-1.59	-6.12	1.78	-13.02	4.82	-15.84	0.28	-11.06	-2.86	-10.67	-0.17	-14.42	-1.41	-19.63	-6.53	-13.26	2.1
	-18.73	-1.4	-3.8	-0.45	-9.75	-0.02	-9.68	-1.58	-11.58	-1.75	-5.94	1.77	-12.85	4.66	-15.72	0.76	-10.85	-2.71	-10.34	0.01	-14.31	-1.68	-19.6	-6.52	-13.29	2
	-18.51	-1.42			-9.67	-0.04	-9.52	-1.61	-11.39	-1.71			-12.77	4.72	-15.37	0.61	-10.71	-3.02	-10.38	-0.44	-14.02	-1.24	-19.35	-6.42	-13.12	2.01
	-18.31	-1.28			-9.29	-0.17	-9.28	-1.68	-11.24	-1.92			-12.75	4.58	-15.1	0.57	-10.53	-2.81	-10.11	-0.32	-13.79	-1.47	-19.1	-6.39	-13.07	1.95
	-18.15	-1.49			-8.87	-0.14	-9.18	-1.86	-11.05	-1.63			-12.34	4.82	-15.18	0.48	-10.46	-2.82	-9.94	-0.31	-13.83	-1.49	-18.81	-6.27	-13.04	1.89
	-18.16	-1.56			-8.34	-0.14	-8.87	-1.81	-11.05	-1.58			-12.23	4.71	-14.53	0.75	-10.26	-3.15	-9.86	-0.56	-13.64	-1.37	-18.65	-6.24	-12.62	1.74
	-17.97	-1.5			-8.13	-0.04	-8.47	-1.7	-10.78	-1.95			-12.1	4.64	-14.64	0.49	-9.99	-2.9	-9.47	-0.29	-13.72	-1.43	-18.4	-6.21	-12.19	1.62
	-17.76	-1.49			-7.74	-0.1	-8.24	-1.73	-10.64	-1.82			-11.94	4.69	-14.65	0.48	-9.69	-2.97	-9.37	-0.36	-13.53	-1.39	-18.28	-6.21	-11.96	1.65
	-17.71	-1.45			-7.35	-0.05	-8.11	-1.69	-10.51	-1.94			-11.7	4.59	-14.31	0.76	-9.88	-3.17	-9.16	-0.42	-13.29	-1.72	-18.03	-6.03	-11.72	1.64
	-17.63	-1.61			-6.9	-0.13	-7.94	-1.41	-10.45	-1.55			-11.79	4.5	-14.26	0.3	-9.57	-3.03	-9.08	-0.44	-13.21	-1.42	-17.91	-5.96	-11.75	1.6
	-17.37	-1.51			-6.59	-0.27	-7.9	-1.6	-10.32	-2.04			-11.37	4.67	-13.94	0.28	-9.45	-3.23	-8.87	-0.42	-13.1	-1.45	-17.83	-5.75	-11.5	1.44
	-17.17	-1.54			-6.24	-0.06	-7.61	-1.72	-10.16	-1.96			-11.32	4.68	-13.7	0.22	-9.43	-3.15	-8.7	-0.21	-12.67	-1.92	-17.66	-5.99	-11.27	1.33
	-17.17	-1.53			-5.98	-0.22	-7.34	-1.8	-9.91	-1.9			-11.24	4.65	-13.48	0.41	-9.32	-3.01	-8.87	-0.58	-12.82	-1.43	-17.52	-5.85	-11.16	1.12
	-16.9	-1.47					-7.2	-1.76	-10.1	-2.02			-11.08	4.48	-13.01	0.46	-9.23	-2.85	-8.32	-0.04	-12.68	-1.34	-17.27	-5.66	-11.1	1.15
	-16.7	-1.53					-6.86	-1.71	-9.7	-2.02			-10.92	4.69	-12.87	0.9	-9.07	-2.92	-8.16	-0.31	-12.58	-1.22	-17.09	-5.68	-10.64	1.14
	-16.58	-1.47					-6.58	-1.82	-9.81	-2.03			-10.85	4.53	-12.91	0.56	-8.5	-2.88	-8.13	-0.74	-12.27	-1.67	-17.03	-5.46	-10.52	1.1
	-16.43	-1.39					-6.5	-1.73	-9.61	-2.04			-10.62	4.19	-12.23	1.01	-8.59	-2.81	-7.75	-0.31	-12.14	-1.82	-16.64	-5.34	-10.32	1.15
	-16.32	-1.41					-6.15	-1.77	-9.4	-1.99			-10.55	4.34	-12.46	0.17	-8.27	-3.06	-7.55	-0.09	-12.09	-1.24	-16.64	-5.44	-10.12	1.13
	-16.23	-1.44					-6.1	-1.86	-9.21	-2.1			-10.22	4.64	-11.88	0.74	-8.42	-2.82	-7.55	-0.29	-12.06	-1.43	-16.38	-5.28	-9.93	0.93
	-16.07	-1.78					-5.87	-1.83	-9.18	-2.17			-10.12	4.51	-12.16	0.33	-8.16	-2.8	-7.2	-0.31	-11.68	-1.8	-16.27	-5.26	-9.89	0.99
	-15.91	-1.25					-5.35	-1.87	-9.16	-2.19			-10.18	4.22	-11.9	0.59	-7.99	-2.78	-7.17	-0.46	-11.84	-1.44	-16.01	-5.32	-9.77	0.92
	-15.88	-1.22					-5.29	-1.72	-9	-2.1			-9.86	4.55	-11.18	1.09	-8.19	-2.78	-6.96	-0.31	-11.41	-1.86	-15.79	-5.07	-9.67	0.74
	-15.73	-1.17					-5.12	-1.73	-8.76	-2.19			-9.76	4.2	-11.02	0.91	-7.67	-2.67	-6.74	-0.29	-11.61	-1.81	-15.64	-5.01	-9.51	0.87
	-15.47	-1.26					-4.89	-1.73	-8.48	-2.33			-9.61	4.24	-11.23	0.7	-7.74	-2.86	-6.62	-0.19	-11.59	-1.51	-15.38	-4.99	-9.21	0.98
	-15.54	-1.09					-4.74	-1.8	-8.38	-2.26			-9.49	4.21	-11.12	0.58	-7.37	-2.73	-6.54	-0.19	-11.03	-1.84	-15.35	-5.03	-8.98	1.11
	-15.36	-1.17							-7.93	-2.24			-9.5	4.14	-11.05	0.53	-7.3	-2.65	-6.36	-0.17	-11.27	-1.61	-15	-4.88	-8.98	1.03
	-15.14	-1.12							-8.13	-2.3			-9.15	4.43	-10.92	0.48	-7.49	-2.5	-6.31	-0.14	-10.78	-1.98	-15.03	-4.88	-8.67	1
	-14.95	-1.19							-7.8	-2.35			-9.22	4.37	-10.57	0.67	-7.22	-2.4	-6.01	-0.17	-10.7	-1.71	-14.85	-4.91	-8.32	0.9
	-15.06	-1.23							-7.39	-2.35			-9	4.3	-10.44	0.54	-7.04	-2.55			-10.76	-1.56	-14.5	-4.8	-8.52	0.73
	-14.87	-1.24							-7.4	-2.16			-8.96	4.25	-10.22	0.56	-7	-2.7			-10.6	-1.69	-14.41	-4.8	-7.88	0.66
	-14.73	-1.24							-7.33	-2.24			-8.75	4.32	-9.74	0.57	-6.8	-2.59			-10.57	-1.48	-14.16	-4.73	-7.73	0.63
	-14.68	-1.24							-7.34	-2.21			-8.69	4.16	-9.44	0.57	-6.83	-2.5			-10.51	-1.69	-13.83	-4.77	-7.66	0.79
	-14.53	-1.21							-6.98	-2.16			-8.62	4.22	-9.45	0.57	-6.61	-2.33			-10.25	-1.44	-14	-4.66	-7.94	0.65
	-14.36	-1.33							-6.63	-2.07			-8.37	4.09	-9.13	0.56	-6.8	-2.38			-10.1	-1.47	-13.75	-4.6	-7.62	0.85
	-14.22	-1.27							-6.52	-2.28			-8.49	4.07	-8.79	0.57	-6.53	-2.29			-9.97	-1.59	-13.57	-4.52	-7.51	0.77
	-14.08	-1.23							-6.36	-2.24			-8.18	3.95	-8.85	1.06	-6.4	-2.36			-9.85	-1.59	-13.16	-4.35	-7.49	0.5
	-14.18	-1.3							-6.44	-2.15			-8.1	3.92	-8.2	0.88	-6.42	-2.3			-9.78	-1.63	-13.22	-4.46	-7.07	0.89
	-13.85	-1.36							-6.16	-2.19			-7.95	4.04	-8.35	0.65	-6.16	-2.2			-9.87	-1.37	-12.79	-4.46	-7.36	0.47
	-13.76	-1.57							-5.96	-2.16			-7.69	4.01	-8.12	0.98	-6.14	-2.23			-9.3	-1.72	-12.77	-4.3	-6.95	0.5
	-13.69	-1.41											-7.67	4.06	-8.01	0.8	-6.02	-2.07			-9.33	-1.38	-12.55	-4.35	-6.7	0.39
	-13.71	-1.37											-7.61	4.06	-7.56	0.8	-5.72	-2.35			-9.24	-1.26	-12.4	-4.18	-7.13	0.45
	-13.63	-1.5											-7.47	3.86	-7.51	0.74	-5.65	-2.33			-8.99	-1.45	-12.05	-4.22	-6.71	0.27
	-13.72	-1.28											-7.36	3.75	-7.21	0.87	-5.66	-1.95			-9.1	-1.08	-11.87	-4.24	-6.74	0.45
	-13.55	-1.47											-7.31	3.91	-7.19	0.82	-5.54	-1.97			-8.69	-1.17	-11.75	-4.14	-6.09	0.17
	-13.38	-1.41											-7.11	3.65	-6.88	0.75	-5.55	-1.77			-8.9	-1.06	-11.42	-3.98	-6.19	0.46
	-13.3	-1.58											-7.1	3.67	-6.55	0.78	-5.57	-1.86			-8.29	-1.18	-11.62	-4.06	-6.01	0.42
	-13.15	-1.52											-6.93	3.62	-6.23	0.69	-5.23	-1.9			-8.37	-1.05	-11.16	-3.94
	-13.05	-1.4											-6.9	3.37	-6.14	0.87					-8.3	-1.13	-11.22	-4.03
	-13.02	-1.25											-6.84	3.6							-8	-1.27	-10.82	-3.96
	-13.02	-1.2											-6.74	3.53							-7.98	-1	-10.52	-3.97
	-12.8	-1.18											-6.66	3.44							-7.77	-1.09	-10.62	-3.77
	-12.89	-1.19											-6.52	3.5							-7.69	-0.96	-10.15	-3.64
	-12.61	-1.42											-6.4	3.36							-7.56	-0.86	-10.3	-3.64
	-12.4	-1.47											-6.38	3.41							-7.83	-0.81	-9.9	-3.78
	-12.07	-1.5											-6.28	3.43							-7.35	-0.98	-9.79	-3.62
	-12.02	-1.4											-6.22	3.15							-7.15	-0.97	-9.6	-3.58
	-11.79	-1.43											-6.06	3.33							-7.18	-0.61	-9.27	-3.44
	-11.7	-1.46																			-7.33	-0.86	-9.22	-3.3
	-11.47	-1.6																			-6.82	-0.96	-8.95	-3.39
	-11.42	-1.44																			-6.85	-0.65	-8.88	-3.08
	-11.2	-1.76																			-6.83	-0.66	-8.66	-3.2
	-11.09	-1.45																			-6.48	-0.92	-8.35	-3.21
	-11.13	-1.43																			-6.49	-0.78	-8.13	-3.04
	-10.62	-1.85																			-6.47	-0.71	-8.06	-2.85
	-10.68	-1.73																			-6.17	-0.88	-7.95	-2.79
	-10.63	-1.64																			-5.9	-0.96	-7.82	-2.7
	-10.49	-1.78																			-5.79	-1.13	-7.66	-2.59
	-10.39	-1.87																			-5.81	-0.98	-7.55	-2.62
	-10.26	-2.05																			-5.7	-0.97	-7.33	-2.43
	-10.18	-1.8																			-5.46	-1.15	-7.37	-2.57
	-10.03	-1.76																					-7.14	-2.43
	-9.74	-1.81																					-6.85	-2.28
	-10.11	-1.56																					-6.71	-2.22
	-9.63	-1.59																					-6.53	-2.14
	-9.36	-1.9																					-6.35	-2.08
	-9.43	-1.58																					-6.06	-1.86
	-9.23	-1.67																					-6.07	-1.84
	-9.1	-1.67																					-5.67	-1.75
	-9.16	-1.68																					-5.44	-1.59
	-8.98	-1.61																					-5.33	-1.54
	-8.84	-1.8																					-5.36	-1.45
	-8.63	-1.84																					-5.05	-1.34
	-8.65	-1.77																					-4.78	-1.3
	-8.51	-1.69
	-8.46	-1.71
	-8.29	-1.81
	-8.2	-1.75
	-8.01	-1.79
	-7.91	-2.02
	-8.05	-1.84
	-7.83	-1.86
	-7.72	-1.73
	-7.49	-1.95
	-7.64	-1.79
	-7.22	-1.81
	-7.34	-1.82
	-7.24	-1.9
	-7.09	-1.84
	-7.39	-1.64
	-6.92	-1.79
	-7.05	-1.75
	-7	-1.68
	-7.03	-1.69
	-6.86	-1.58
	-6.58	-1.8
	-6.65	-1.55
	-6.69	-1.46
	-6.65	-1.51
	-6.58	-1.41
	-6.32	-1.63
	-6.28	-1.74
	-6.19	-1.49
	-6.13	-1.43
	-6.12	-1.45
	-6	-1.4
	-5.75	-1.5
	-5.8	-1.47
	-5.46	-1.61
	-5.37	-1.55

## Sheet: 5E
Non-tracking	abs(Y) at 20 cm (cm)	Mean	SD	N	Tracking	Y at 20 cm (cm)	Mean	SD	N
	1.0951	4.34828	3.99487	13		1.30926	1.42803	1.9726	13
	2.5062					0.00856292
	0.1906					0.124452
	12.683					2.00022
	4.0403					0.130321
	1.4693					0.546597
	5.0826					3.5544
	3.6783					0.068687
	3.5276					0.187957
	0.8487					0.732956
	2.7394					0.0181656
	6.4876					6.54012
	12.179					3.34265

## Sheet: 5F
Non-tracking	Max Abs(Y) (cm)	Mean	SD	N		Tracking	Max abs(Y) (cm)	Mean	SD	N
	2.9054	7.74705	4.89443	13			2.0506	2.84075	2.0206	13
	5.898						2.4445
	4.9434						1.4522
	13.8519						2.3229
	6.2153						2.3515
	8.1683						1.7928
	17.6427						4.8214
	4.2851						1.234
	3.9234						3.2252
	3.6154						1.0153
	4.7359						1.9821
	8.9855						8.6154
	15.5413						3.6219

## Sheet: 5G
Non-tracking	Area under curve	Mean	SD	N	Tracking	Area under curve	Mean	SD	N
	(cm2)					(cm2)
	387.08	135.641	102.734	13		179.055	51.2843	45.7542	13
	263.951					97.866
	229.802					74.3616
	184.313					59.5553
	131.473					54.3699
	90.9736					37.1206
	85.3743					34.1343
	85.2087					33.9778
	77.3888					26.197
	74.2834					22.1256
	58.2888					16.9325
	48.6146					16.1384
	46.5763					14.862
