# Supplementary material for: Visual pursuit behavior in mice maintains the pursued prey on the retinal region with least optic flow
Source: eLife. 2021 Oct 26;10:e70838. doi: 10.7554/eLife.70838 (PMC8547958; doi:10.7554/eLife.70838)
Supplement: Figure 7—source data 1. [file elife-70838-fig7-data1.xlsx]

## Sheet: 7C
No Spot		TiO2 spot		N						Wilcoxon's Rank Sum Test
Light	Dark	Light	Dark	No spot	No spot	TiO2 spot	TiO2 spot	N Mice	N mice			p value (calculated using Matlab ranksum function)
Time to capture (s)	Time to capture (s)	Time to capture (s)	Time to capture (s)	Light	Dark	Light	Dark	No spot	TiO2 spot	Light vs Dark (No spot)	0.00119197
12.65	6.3	17.25	31.1	19	19	10	9	6	3	Light vs Dark (TiO2 spot)	0.0132716
7.61	48.24	6.56	90							Light (spot) vs Light (TiO2 spot)	0.696532
9.55	42.2	3.9	23.2							Dark (spot) vs Dark (TiO2 spot)	1
16.14	51.91	25.35	25.47
22.34	42.19	12.22	9.09
13.99	53.79	10.66	18.34
14.74	27.21	11.53	118.48
19.61	42.19	23.34	58.52
11.28	22.97	16.48	28.45
12.09	45.51	27.94
15.09	62.1
11.03	13.5
10.6	15.95
16.37	127.2
20.07	17.7
14.88	90.96
18.75	10.01
15.39	90.3
9.13	11.6
